# Supplementary material for: QTL mapping of human retina DNA methylation identifies 87 gene-epigenome interactions in age-related macular degeneration
Source: Research Square preprint supplement (doi:10.21203/rs.3.rs-3011096/v1), 2023-06-16
Supplement: Supplementary file 22 [file Supplementary_Table16.xlsx]

## Sheet: Sheet1
E	M	best.snp.EM	PPA.EM	chr	Gene_symbol	Biotype
ENSG00000164008	cg26010711	rs2008207	0.800034	chr1	C1orf50	protein_coding
ENSG00000156876	cg06426831	rs2784172	0.800154	chr1	SASS6	protein_coding
ENSG00000189339	cg22827694	rs143038747	0.800155	chr1	SLC35E2B	protein_coding
ENSG00000004455	cg26816552	rs11581686	0.800195	chr1	AK2	protein_coding
ENSG00000235098	cg09368716	rs1781135	0.800312	chr1	ANKRD65	protein_coding
ENSG00000181873	cg03054277	rs10916277	0.800336	chr1	IBA57	protein_coding
ENSG00000185499	cg16848098	rs41264939	0.80074	chr1	MUC1	protein_coding
ENSG00000134744	cg13221868	rs17107217	0.80078	chr1	ZCCHC11	protein_coding
ENSG00000181873	cg01557798	rs72757811	0.800782	chr1	IBA57	protein_coding
ENSG00000206652	cg02375669	rs113847540	0.800832	chr1	RNU1-1	snRNA
ENSG00000142632	cg24838495	rs67833669	0.80091	chr1	ARHGEF19	protein_coding
ENSG00000185499	cg00034416	rs12081433	0.800982	chr1	MUC1	protein_coding
ENSG00000271853	cg19849754	rs35760493	0.801227	chr1	RP1-178F15.5	processed_transcript
ENSG00000225828	cg08859095	rs147271820	0.801252	chr1	FAM229A	protein_coding
ENSG00000158109	cg17827148	rs13328662	0.80126	chr1	TPRG1L	protein_coding
ENSG00000117305	cg18888403	rs974698	0.801335	chr1	HMGCL	protein_coding
ENSG00000175756	cg26114254	rs202103056	0.801358	chr1	AURKAIP1	protein_coding
ENSG00000116675	cg05347379	rs2118104	0.801384	chr1	DNAJC6	protein_coding
ENSG00000171603	cg27553947	rs11121497	0.801401	chr1	CLSTN1	protein_coding
ENSG00000225828	cg12064008	rs12140988	0.801505	chr1	FAM229A	protein_coding
ENSG00000215915	cg11140595	rs6704200	0.801555	chr1	ATAD3C	protein_coding
ENSG00000185436	cg11967466	rs142115060	0.8016	chr1	IFNLR1	protein_coding
ENSG00000134686	cg27526149	rs61769872	0.80166	chr1	PHC2	protein_coding
ENSG00000117394	cg18394614	rs116550328	0.801667	chr1	SLC2A1	protein_coding
ENSG00000162910	cg08845001	rs11585491	0.801822	chr1	MRPL55	protein_coding
ENSG00000125945	cg11067453	rs754984	0.801833	chr1	ZNF436	protein_coding
ENSG00000266472	cg02763817	rs71086513	0.801889	chr1	MRPS21	protein_coding
ENSG00000116514	cg06419113	rs194666	0.801944	chr1	RNF19B	protein_coding
ENSG00000185220	cg03764335	rs11488135	0.801993	chr1	PGBD2	protein_coding
ENSG00000225828	cg09598054	rs12135109	0.802134	chr1	FAM229A	protein_coding
ENSG00000160097	cg14167389	rs116120304	0.802142	chr1	FNDC5	protein_coding
ENSG00000160058	cg12064008	rs12143026	0.802195	chr1	BSDC1	protein_coding
ENSG00000162688	cg16724148	rs10875245	0.802291	chr1	AGL	protein_coding
ENSG00000162688	cg14063843	rs10875245	0.802357	chr1	AGL	protein_coding
ENSG00000117500	cg14550667	rs4434844	0.80238	chr1	TMED5	protein_coding
ENSG00000131238	cg16829135	rs60640112	0.802403	chr1	PPT1	protein_coding
ENSG00000117408	cg18446895	rs116119000	0.80258	chr1	IPO13	protein_coding
ENSG00000117408	cg20452714	rs116119000	0.802581	chr1	IPO13	protein_coding
ENSG00000117408	cg06207804	rs116119000	0.802581	chr1	IPO13	protein_coding
ENSG00000143179	cg02449975	rs2018265	0.80263	chr1	UCK2	protein_coding
ENSG00000162461	cg00601916	rs1108185	0.802796	chr1	SLC25A34	protein_coding
ENSG00000236200	cg15994385	rs11210871	0.802843	chr1	KDM4A-AS1	antisense
ENSG00000160058	cg26079579	rs72652105	0.802884	chr1	BSDC1	protein_coding
ENSG00000235131	cg21262776	rs6669612	0.803012	chr1	RP5-1092A11.2	antisense
ENSG00000225828	cg01555014	rs2273376	0.803027	chr1	FAM229A	protein_coding
ENSG00000162755	cg23374266	rs150053906	0.803153	chr1	KLHDC9	protein_coding
ENSG00000143374	cg01705587	rs7521171	0.803265	chr1	TARS2	protein_coding
ENSG00000143457	cg04286638	rs35002905	0.803297	chr1	GOLPH3L	protein_coding
ENSG00000078618	cg20341067	rs61780593	0.803321	chr1	NRDC	protein_coding
ENSG00000189171	cg16494429	rs79219014	0.803405	chr1	S100A13	protein_coding
ENSG00000182873	cg22851557	rs3107155	0.803425	chr1	RP11-181G12.2	antisense
ENSG00000273382	cg23280418	rs7519442	0.803512	chr1	RP5-1065J22.8	antisense
ENSG00000225828	cg08859095	rs12140988	0.803539	chr1	FAM229A	protein_coding
ENSG00000271853	cg11343894	rs35890519	0.803736	chr1	RP1-178F15.5	processed_transcript
ENSG00000160058	cg08859095	rs12143026	0.80386	chr1	BSDC1	protein_coding
ENSG00000116299	cg07389870	rs41281344	0.803902	chr1	KIAA1324	protein_coding
ENSG00000116903	cg09506761	rs1411019	0.803982	chr1	EXOC8	protein_coding
ENSG00000142677	cg05446908	rs67540009	0.804022	chr1	IL22RA1	protein_coding
ENSG00000219481	cg18194393	rs281826	0.804103	chr1	NBPF1	protein_coding
ENSG00000160097	cg17327404	rs4951774	0.80411	chr1	FNDC5	protein_coding
ENSG00000171603	cg02634861	rs72855780	0.804114	chr1	CLSTN1	protein_coding
ENSG00000189171	cg15512175	rs72698169	0.80421	chr1	S100A13	protein_coding
ENSG00000117305	cg24699146	rs11588187	0.804253	chr1	HMGCL	protein_coding
ENSG00000049239	cg17805199	rs9435144	0.804267	chr1	H6PD	protein_coding
ENSG00000261168	cg06179645	rs7522608	0.804364	chr1	RP11-68I18.10	sense_overlapping
ENSG00000116329	cg06352483	rs140467828	0.804464	chr1	OPRD1	protein_coding
ENSG00000143537	cg24250549	rs45444697	0.804474	chr1	ADAM15	protein_coding
ENSG00000133059	cg23362667	rs10793727	0.804601	chr1	DSTYK	protein_coding
ENSG00000132681	cg03377265	rs72713642	0.804635	chr1	ATP1A4	protein_coding
ENSG00000162545	cg13904704	rs10916779	0.804644	chr1	CAMK2N1	protein_coding
ENSG00000160097	cg26115470	rs12070847	0.804708	chr1	FNDC5	protein_coding
ENSG00000142632	cg25793964	rs1780609	0.804721	chr1	ARHGEF19	protein_coding
ENSG00000117407	cg17260276	rs783304	0.804874	chr1	ARTN	protein_coding
ENSG00000206652	cg08887581	rs3738637	0.804925	chr1	RNU1-1	snRNA
ENSG00000117408	cg11837102	rs116119000	0.80501	chr1	IPO13	protein_coding
ENSG00000271853	cg06562291	rs9660679	0.805093	chr1	RP1-178F15.5	processed_transcript
ENSG00000164010	cg04131063	rs80085693	0.805165	chr1	ERMAP	protein_coding
ENSG00000127054	cg11808871	rs4648631	0.80521	chr1	CPSF3L	protein_coding
ENSG00000162650	cg03461243	rs3120639	0.805213	chr1	ATXN7L2	protein_coding
ENSG00000182004	cg10519709	rs10736846	0.805323	chr1	SNRPE	protein_coding
ENSG00000117408	cg11958827	rs116119000	0.805339	chr1	IPO13	protein_coding
ENSG00000143157	cg03050684	rs7531189	0.805361	chr1	POGK	protein_coding
ENSG00000117408	cg13666471	rs116119000	0.805374	chr1	IPO13	protein_coding
ENSG00000226029	cg09178529	rs2610597	0.805528	chr1	RP4-798A10.2	lincRNA
ENSG00000122218	cg13149276	rs6669689	0.805584	chr1	COPA	protein_coding
ENSG00000213064	cg19948045	rs3835595	0.805602	chr1	SFT2D2	protein_coding
ENSG00000118298	cg04503063	rs6685252	0.805606	chr1	CA14	protein_coding
ENSG00000158769	cg04130057	rs112701077	0.805662	chr1	F11R	protein_coding
ENSG00000117408	cg08959526	rs116119000	0.805716	chr1	IPO13	protein_coding
ENSG00000238287	cg25195960	rs4534368	0.805753	chr1	RP11-656D10.3	antisense
ENSG00000143398	cg17623046	rs150990548	0.806027	chr1	PIP5K1A	protein_coding
ENSG00000004455	cg13488944	rs56790183	0.806103	chr1	AK2	protein_coding
ENSG00000280378	cg13764106	rs56047272	0.806135	chr1	RP4-758J24.6	TEC
ENSG00000188643	cg24304714	rs79204205	0.806186	chr1	S100A16	protein_coding
ENSG00000272145	cg12284566	rs2294753	0.806377	chr1	NFYC-AS1	antisense
ENSG00000207513	cg08887581	rs141853016	0.806615	chr1	RNU1-3	snRNA
ENSG00000273487	cg00331081	rs139786195	0.806658	chr1	RP4-621B10.8	lincRNA
ENSG00000273382	cg11284811	rs112082443	0.806669	chr1	RP5-1065J22.8	antisense
ENSG00000143811	cg04482794	rs77157663	0.806736	chr1	PYCR2	protein_coding
ENSG00000174529	cg25006786	rs143823297	0.806827	chr1	TMEM81	protein_coding
ENSG00000169213	cg00151525	rs2842579	0.806834	chr1	RAB3B	protein_coding
ENSG00000143318	cg22891465	rs6427572	0.806881	chr1	CASQ1	protein_coding
ENSG00000207005	cg00978570	rs3738637	0.806896	chr1	RNU1-2	snRNA
ENSG00000237975	cg26644914	rs140771909	0.806935	chr1	FLG-AS1	antisense
ENSG00000219481	cg14553527	rs11585710	0.807163	chr1	NBPF1	protein_coding
ENSG00000181873	cg01200585	rs10916277	0.807514	chr1	IBA57	protein_coding
ENSG00000160716	cg23216745	rs150900974	0.807576	chr1	CHRNB2	protein_coding
ENSG00000189171	cg25525754	rs41267636	0.807715	chr1	S100A13	protein_coding
ENSG00000134222	cg01526259	rs1475693	0.807816	chr1	PSRC1	protein_coding
ENSG00000186301	cg15291289	rs2761490	0.80782	chr1	MST1P2	unprocessed_pseudogene
ENSG00000117425	cg27048324	rs59317019	0.807822	chr1	PTCH2	protein_coding
ENSG00000182118	cg22430231	rs1321132	0.807836	chr1	FAM89A	protein_coding
ENSG00000049239	cg15090005	rs4360526	0.807845	chr1	H6PD	protein_coding
ENSG00000160716	cg06418219	rs150900974	0.807902	chr1	CHRNB2	protein_coding
ENSG00000207513	cg12282516	rs12131407	0.807905	chr1	RNU1-3	snRNA
ENSG00000225828	cg27539046	rs2273376	0.807921	chr1	FAM229A	protein_coding
ENSG00000107404	cg01949002	rs4648829	0.807962	chr1	DVL1	protein_coding
ENSG00000159479	cg03511605	rs6429604	0.807999	chr1	MED8	protein_coding
ENSG00000225828	cg26079579	rs12135109	0.808016	chr1	FAM229A	protein_coding
ENSG00000181873	cg24846680	rs10916277	0.808061	chr1	IBA57	protein_coding
ENSG00000158006	cg20801718	rs78092370	0.808177	chr1	PAFAH2	protein_coding
ENSG00000215883	cg22118858	rs2141078	0.808386	chr1	CYB5RL	protein_coding
ENSG00000118298	cg09082263	rs147248456	0.808397	chr1	CA14	protein_coding
ENSG00000163050	cg03307360	rs35213802	0.8084	chr1	ADCK3	protein_coding
ENSG00000152760	cg21115004	rs3806321	0.80857	chr1	TCTEX1D1	protein_coding
ENSG00000081026	cg08339208	rs1683252	0.808629	chr1	MAGI3	protein_coding
ENSG00000152760	cg14626797	rs3806321	0.808746	chr1	TCTEX1D1	protein_coding
ENSG00000182873	cg00391668	rs3128294	0.809229	chr1	RP11-181G12.2	antisense
ENSG00000117425	cg03146154	rs77789589	0.809253	chr1	PTCH2	protein_coding
ENSG00000283495	cg03956908	rs9887771	0.809379	chr1	AC096949.1	protein_coding
ENSG00000162688	cg03956908	rs7543433	0.809411	chr1	AGL	protein_coding
ENSG00000163349	cg18973817	rs924778	0.809463	chr1	HIPK1	protein_coding
ENSG00000188643	cg21846488	rs79204205	0.809504	chr1	S100A16	protein_coding
ENSG00000170382	cg23035341	rs4252707	0.809513	chr1	LRRN2	protein_coding
ENSG00000204178	cg22391348	rs12041604	0.809545	chr1	TMEM57	protein_coding
ENSG00000283495	cg24916377	rs9887771	0.809603	chr1	AC096949.1	protein_coding
ENSG00000162688	cg14553297	rs9887771	0.809644	chr1	AGL	protein_coding
ENSG00000273382	cg09250146	rs579947	0.809692	chr1	RP5-1065J22.8	antisense
ENSG00000162688	cg24916377	rs7543433	0.809727	chr1	AGL	protein_coding
ENSG00000162688	cg25758167	rs7543433	0.809729	chr1	AGL	protein_coding
ENSG00000163485	cg25482438	rs4950928	0.809761	chr1	ADORA1	protein_coding
ENSG00000134686	cg15080335	rs61769872	0.809772	chr1	PHC2	protein_coding
ENSG00000162688	cg01933228	rs7543433	0.809774	chr1	AGL	protein_coding
ENSG00000271853	cg11915664	rs9729773	0.809777	chr1	RP1-178F15.5	processed_transcript
ENSG00000162688	cg27425127	rs7543433	0.809782	chr1	AGL	protein_coding
ENSG00000142937	cg07296918	rs1637284	0.809789	chr1	RPS8	protein_coding
ENSG00000283495	cg14553297	rs9887771	0.80983	chr1	AC096949.1	protein_coding
ENSG00000271853	cg04077668	rs9729773	0.809992	chr1	RP1-178F15.5	processed_transcript
ENSG00000118298	cg03797628	rs41304255	0.810031	chr1	CA14	protein_coding
ENSG00000283495	cg01933228	rs9887771	0.810116	chr1	AC096949.1	protein_coding
ENSG00000283495	cg27425127	rs9887771	0.810235	chr1	AC096949.1	protein_coding
ENSG00000283495	cg25758167	rs9887771	0.810275	chr1	AC096949.1	protein_coding
ENSG00000237950	cg13246856	rs6801	0.810304	chr1	RP11-7O11.3	antisense
ENSG00000273382	cg23639374	rs579947	0.810327	chr1	RP5-1065J22.8	antisense
ENSG00000116138	cg07715257	rs76843015	0.810488	chr1	DNAJC16	protein_coding
ENSG00000215845	cg13906823	rs1556260	0.810533	chr1	TSTD1	protein_coding
ENSG00000248485	cg09387559	rs2501866	0.810735	chr1	PCP4L1	protein_coding
ENSG00000196071	cg04353581	rs6701018	0.810762	chr1	OR2L13	protein_coding
ENSG00000116221	cg17182355	rs686106	0.810771	chr1	MRPL37	protein_coding
ENSG00000117305	cg15997130	rs11588187	0.810776	chr1	HMGCL	protein_coding
ENSG00000162688	cg19693677	rs9887771	0.810862	chr1	AGL	protein_coding
ENSG00000174529	cg20824939	rs3820338	0.810896	chr1	TMEM81	protein_coding
ENSG00000273382	cg23706211	rs579947	0.810971	chr1	RP5-1065J22.8	antisense
ENSG00000099260	cg10424513	rs834984	0.811144	chr1	PALMD	protein_coding
ENSG00000176022	cg20300707	rs6603782	0.81117	chr1	B3GALT6	protein_coding
ENSG00000116514	cg04906435	rs8040	0.811188	chr1	RNF19B	protein_coding
ENSG00000283495	cg19693677	rs9887771	0.811226	chr1	AC096949.1	protein_coding
ENSG00000143434	cg00318000	rs12088941	0.811258	chr1	SEMA6C	protein_coding
ENSG00000185436	cg26835312	rs61772905	0.811269	chr1	IFNLR1	protein_coding
ENSG00000162688	cg24916377	rs9887771	0.811287	chr1	AGL	protein_coding
ENSG00000189171	cg27469660	rs35890519	0.811317	chr1	S100A13	protein_coding
ENSG00000164002	cg25568243	rs75831615	0.811415	chr1	EXO5	protein_coding
ENSG00000273382	cg16562342	rs579947	0.811467	chr1	RP5-1065J22.8	antisense
ENSG00000189171	cg16762532	rs41267636	0.811705	chr1	S100A13	protein_coding
ENSG00000283495	cg24916377	rs9887771	0.811716	chr1	AC096949.1	protein_coding
ENSG00000162688	cg20948262	rs7543433	0.811956	chr1	AGL	protein_coding
ENSG00000283495	cg20948262	rs9887771	0.812016	chr1	AC096949.1	protein_coding
ENSG00000189171	cg07898899	rs35890519	0.812028	chr1	S100A13	protein_coding
ENSG00000242485	cg13798228	rs2843154	0.812099	chr1	MRPL20	protein_coding
ENSG00000143641	cg16316407	rs59207846	0.812101	chr1	GALNT2	protein_coding
ENSG00000162688	cg04308687	rs7543433	0.812173	chr1	AGL	protein_coding
ENSG00000001461	cg21531089	rs195730	0.812181	chr1	NIPAL3	protein_coding
ENSG00000169914	cg02853781	rs76946123	0.812207	chr1	OTUD3	protein_coding
ENSG00000162688	cg10018845	rs7543433	0.812223	chr1	AGL	protein_coding
ENSG00000283495	cg04308687	rs9887771	0.812319	chr1	AC096949.1	protein_coding
ENSG00000283495	cg10018845	rs9887771	0.812392	chr1	AC096949.1	protein_coding
ENSG00000207389	cg08887581	rs141853016	0.812524	chr1	RNU1-4	snRNA
ENSG00000121905	cg16007395	rs4951771	0.812696	chr1	HPCA	protein_coding
ENSG00000271853	cg11596404	rs9729773	0.812826	chr1	RP1-178F15.5	processed_transcript
ENSG00000116497	cg26787521	rs6694085	0.812873	chr1	S100PBP	protein_coding
ENSG00000225828	cg21172540	rs12140988	0.812992	chr1	FAM229A	protein_coding
ENSG00000261168	cg03258749	rs115847329	0.813062	chr1	RP11-68I18.10	sense_overlapping
ENSG00000143457	cg11329713	rs35002905	0.813083	chr1	GOLPH3L	protein_coding
ENSG00000160058	cg09598054	rs72652105	0.81324	chr1	BSDC1	protein_coding
ENSG00000229444	cg23028072	rs114361356	0.813353	chr1	RP11-184I16.4	antisense
ENSG00000143774	cg20999799	rs111433618	0.81353	chr1	GUK1	protein_coding
ENSG00000197747	cg16762532	rs41267636	0.813665	chr1	S100A10	protein_coding
ENSG00000117305	cg07813615	rs11588187	0.813869	chr1	HMGCL	protein_coding
ENSG00000235527	cg11518509	rs17032048	0.813997	chr1	HIPK1-AS1	antisense
ENSG00000162461	cg07715257	rs76843015	0.814016	chr1	SLC25A34	protein_coding
ENSG00000207005	cg00978570	rs9442191	0.814033	chr1	RNU1-2	snRNA
ENSG00000117305	cg23574449	rs12116511	0.814059	chr1	HMGCL	protein_coding
ENSG00000160072	cg18392644	rs1781149	0.814172	chr1	ATAD3B	protein_coding
ENSG00000182118	cg07390013	rs12407450	0.81438	chr1	FAM89A	protein_coding
ENSG00000160058	cg21172540	rs12143026	0.814389	chr1	BSDC1	protein_coding
ENSG00000271853	cg02873163	rs35760493	0.814408	chr1	RP1-178F15.5	processed_transcript
ENSG00000272455	cg02668764	rs1695855	0.814583	chr1	RP4-758J18.13	lincRNA
ENSG00000143195	cg12850103	rs186023662	0.814595	chr1	ILDR2	protein_coding
ENSG00000207513	cg21860499	rs113847540	0.814627	chr1	RNU1-3	snRNA
ENSG00000157881	cg09828310	rs70956305	0.814934	chr1	PANK4	protein_coding
ENSG00000221986	cg01291099	rs333957	0.814956	chr1	MYBPHL	protein_coding
ENSG00000117425	cg12978857	rs59317019	0.815117	chr1	PTCH2	protein_coding
ENSG00000189266	cg04989128	rs55899369	0.81519	chr1	PNRC2	protein_coding
ENSG00000189339	cg17507949	rs143038747	0.815197	chr1	SLC35E2B	protein_coding
ENSG00000117407	cg14220329	rs79483007	0.815197	chr1	ARTN	protein_coding
ENSG00000189171	cg02873163	rs11497739	0.815247	chr1	S100A13	protein_coding
ENSG00000160097	cg02455803	rs12070847	0.815292	chr1	FNDC5	protein_coding
ENSG00000203963	cg16996144	rs56333102	0.815307	chr1	C1orf141	protein_coding
ENSG00000272455	cg24475622	rs141714940	0.815426	chr1	RP4-758J18.13	lincRNA
ENSG00000183888	cg11895451	rs188748499	0.815609	chr1	C1orf64	protein_coding
ENSG00000159189	cg24931346	rs148121416	0.815641	chr1	C1QC	protein_coding
ENSG00000143434	cg15185033	rs61817692	0.815848	chr1	SEMA6C	protein_coding
ENSG00000181873	cg26176362	rs12740965	0.816223	chr1	IBA57	protein_coding
ENSG00000189339	cg02823370	rs9442430	0.81623	chr1	SLC35E2B	protein_coding
ENSG00000160058	cg01627483	rs115307537	0.816239	chr1	BSDC1	protein_coding
ENSG00000158769	cg25548811	rs34339899	0.816241	chr1	F11R	protein_coding
ENSG00000143434	cg17724175	rs12742185	0.816291	chr1	SEMA6C	protein_coding
ENSG00000197747	cg08531528	rs61819223	0.81641	chr1	S100A10	protein_coding
ENSG00000185436	cg26835312	rs12094257	0.816446	chr1	IFNLR1	protein_coding
ENSG00000182827	cg25629409	rs80058969	0.816498	chr1	ACBD3	protein_coding
ENSG00000237950	cg12599982	rs4314918	0.816563	chr1	RP11-7O11.3	antisense
ENSG00000143740	cg21459583	rs2295994	0.816694	chr1	SNAP47	protein_coding
ENSG00000185436	cg08700651	rs12094257	0.816736	chr1	IFNLR1	protein_coding
ENSG00000122176	cg26987645	rs16851364	0.816759	chr1	FMOD	protein_coding
ENSG00000117305	cg10205764	rs59640963	0.816797	chr1	HMGCL	protein_coding
ENSG00000177868	cg05525368	rs200240184	0.816844	chr1	SVBP	protein_coding
ENSG00000122176	cg16289210	rs16851364	0.817035	chr1	FMOD	protein_coding
ENSG00000178922	cg07906567	rs6692611	0.817185	chr1	HYI	protein_coding
ENSG00000134198	cg14272177	rs34301696	0.817253	chr1	TSPAN2	protein_coding
ENSG00000160058	cg01676680	rs16834996	0.817664	chr1	BSDC1	protein_coding
ENSG00000189171	cg26148377	rs1046381	0.817696	chr1	S100A13	protein_coding
ENSG00000117408	cg23028072	rs142156869	0.817804	chr1	IPO13	protein_coding
ENSG00000080947	cg21601498	rs139452064	0.817861	chr1	CROCCP3	transcribed_unprocessed_pseudogene
ENSG00000116329	cg04993605	rs10915205	0.817977	chr1	OPRD1	protein_coding
ENSG00000271853	cg02331910	rs35890519	0.818022	chr1	RP1-178F15.5	processed_transcript
ENSG00000121903	cg23442151	rs2641957	0.818045	chr1	ZSCAN20	protein_coding
ENSG00000197747	cg10978274	rs11205084	0.818103	chr1	S100A10	protein_coding
ENSG00000242485	cg04840417	rs1171	0.818175	chr1	MRPL20	protein_coding
ENSG00000080947	cg01164671	rs7545418	0.818406	chr1	CROCCP3	transcribed_unprocessed_pseudogene
ENSG00000182873	cg19413397	rs3107155	0.81842	chr1	RP11-181G12.2	antisense
ENSG00000188643	cg02873163	rs35760493	0.818507	chr1	S100A16	protein_coding
ENSG00000238142	cg04803684	rs698864	0.818539	chr1	RP11-108M9.4	lincRNA
ENSG00000184454	cg20433521	rs139523965	0.818663	chr1	NCMAP	protein_coding
ENSG00000159189	cg05169722	rs140100650	0.818794	chr1	C1QC	protein_coding
ENSG00000220785	cg23012731	rs199780319	0.818817	chr1	MTMR9LP	transcribed_unprocessed_pseudogene
ENSG00000189171	cg17776284	rs11497739	0.818839	chr1	S100A13	protein_coding
ENSG00000189339	cg10057528	rs12566205	0.818906	chr1	SLC35E2B	protein_coding
ENSG00000180098	cg21438252	rs1342086	0.818921	chr1	TRNAU1AP	protein_coding
ENSG00000197747	cg17170458	rs61819223	0.819056	chr1	S100A10	protein_coding
ENSG00000158109	cg06970451	rs13328662	0.819216	chr1	TPRG1L	protein_coding
ENSG00000215908	cg23269169	rs142266983	0.819226	chr1	CROCCP2	transcribed_unprocessed_pseudogene
ENSG00000203663	cg20507276	rs6701018	0.819237	chr1	OR2L2	protein_coding
ENSG00000188643	cg13946767	rs9330298	0.819449	chr1	S100A16	protein_coding
ENSG00000066185	cg08263040	rs116039993	0.819658	chr1	ZMYND12	protein_coding
ENSG00000207389	cg12282516	rs12131407	0.819707	chr1	RNU1-4	snRNA
ENSG00000159479	cg06350161	rs111288020	0.819741	chr1	MED8	protein_coding
ENSG00000117408	cg16047291	rs142156869	0.819851	chr1	IPO13	protein_coding
ENSG00000117419	cg09212210	rs601901	0.819978	chr1	ERI3	protein_coding
ENSG00000169504	cg09314770	rs12033777	0.819986	chr1	CLIC4	protein_coding
ENSG00000169224	cg07313626	rs2141544	0.820148	chr1	GCSAML	protein_coding
ENSG00000215883	cg01264363	rs2141078	0.820151	chr1	CYB5RL	protein_coding
ENSG00000121454	cg17237951	rs113620330	0.820225	chr1	LHX4	protein_coding
ENSG00000121905	cg00959725	rs41263989	0.820366	chr1	HPCA	protein_coding
ENSG00000162378	cg24141115	rs79568889	0.82039	chr1	ZYG11B	protein_coding
ENSG00000122176	cg11297324	rs79410290	0.820417	chr1	FMOD	protein_coding
ENSG00000117408	cg05180596	rs142156869	0.820467	chr1	IPO13	protein_coding
ENSG00000090432	cg26379429	rs33996125	0.820504	chr1	MUL1	protein_coding
ENSG00000225828	cg21172540	rs12135109	0.820532	chr1	FAM229A	protein_coding
ENSG00000162461	cg20843478	rs1108185	0.820544	chr1	SLC25A34	protein_coding
ENSG00000143753	cg07838035	rs12143576	0.820744	chr1	DEGS1	protein_coding
ENSG00000181754	cg09898793	rs17358800	0.820805	chr1	AMIGO1	protein_coding
ENSG00000272145	cg15920552	rs2744798	0.82083	chr1	NFYC-AS1	antisense
ENSG00000207389	cg21860499	rs113847540	0.820837	chr1	RNU1-4	snRNA
ENSG00000132676	cg19246549	rs1106236	0.820857	chr1	DAP3	protein_coding
ENSG00000162433	cg10142878	rs3934817	0.820934	chr1	AK4	protein_coding
ENSG00000126091	cg23028072	rs114361356	0.820943	chr1	ST3GAL3	protein_coding
ENSG00000117408	cg25041176	rs142156869	0.821001	chr1	IPO13	protein_coding
ENSG00000132681	cg11748139	rs116627627	0.821082	chr1	ATP1A4	protein_coding
ENSG00000280378	cg17826594	rs114768998	0.821082	chr1	RP4-758J24.6	TEC
ENSG00000080947	cg14608553	rs4595409	0.821274	chr1	CROCCP3	transcribed_unprocessed_pseudogene
ENSG00000215845	cg11742801	rs1556259	0.821289	chr1	TSTD1	protein_coding
ENSG00000227372	cg18723167	rs3765767	0.821289	chr1	TP73-AS1	unitary_pseudogene
ENSG00000184908	cg12651933	rs12059258	0.821329	chr1	CLCNKB	protein_coding
ENSG00000143772	cg23717186	rs835662	0.821403	chr1	ITPKB	protein_coding
ENSG00000242485	cg27642349	rs34442823	0.821418	chr1	MRPL20	protein_coding
ENSG00000122176	cg11914824	rs12092451	0.821441	chr1	FMOD	protein_coding
ENSG00000066136	cg15920552	rs545218	0.821707	chr1	NFYC	protein_coding
ENSG00000189266	cg26991199	rs55899369	0.821725	chr1	PNRC2	protein_coding
ENSG00000169231	cg16907075	rs2842872	0.821759	chr1	THBS3	protein_coding
ENSG00000058668	cg03140800	rs149181220	0.821866	chr1	ATP2B4	protein_coding
ENSG00000189171	cg26548293	rs1046381	0.821922	chr1	S100A13	protein_coding
ENSG00000158769	cg11161846	rs34339899	0.82194	chr1	F11R	protein_coding
ENSG00000171621	cg20546648	rs139022564	0.821947	chr1	SPSB1	protein_coding
ENSG00000158793	cg13934223	rs10917746	0.822019	chr1	NIT1	protein_coding
ENSG00000225828	cg12064008	rs2273376	0.822234	chr1	FAM229A	protein_coding
ENSG00000271853	cg27469660	rs35890519	0.822242	chr1	RP1-178F15.5	processed_transcript
ENSG00000271853	cg07898899	rs35760493	0.8223	chr1	RP1-178F15.5	processed_transcript
ENSG00000122218	cg15108521	rs6685911	0.822316	chr1	COPA	protein_coding
ENSG00000225828	cg08859095	rs2273376	0.822347	chr1	FAM229A	protein_coding
ENSG00000152763	cg10495572	rs115304639	0.822482	chr1	WDR78	protein_coding
ENSG00000143458	cg07315993	rs12401456	0.822619	chr1	GABPB2	protein_coding
ENSG00000143819	cg07193504	rs12563243	0.822649	chr1	EPHX1	protein_coding
ENSG00000215908	cg08064161	rs9435723	0.82265	chr1	CROCCP2	transcribed_unprocessed_pseudogene
ENSG00000162461	cg22874802	rs9442199	0.822765	chr1	SLC25A34	protein_coding
ENSG00000203663	cg26309691	rs114912909	0.822915	chr1	OR2L2	protein_coding
ENSG00000122176	cg21600897	rs61825748	0.823188	chr1	FMOD	protein_coding
ENSG00000188643	cg15104031	rs56366330	0.823241	chr1	S100A16	protein_coding
ENSG00000168159	cg26998389	rs3839025	0.823331	chr1	RNF187	protein_coding
ENSG00000158109	cg04865841	rs2760317	0.823414	chr1	TPRG1L	protein_coding
ENSG00000160716	cg18196712	rs79794939	0.823503	chr1	CHRNB2	protein_coding
ENSG00000227533	cg06094523	rs200895692	0.823616	chr1	SLC2A1-AS1	lincRNA
ENSG00000119280	cg09938881	rs11122494	0.823683	chr1	C1orf198	protein_coding
ENSG00000122218	cg13149276	rs4656892	0.823697	chr1	COPA	protein_coding
ENSG00000237975	cg25170409	rs140771909	0.823712	chr1	FLG-AS1	antisense
ENSG00000117602	cg00917251	rs195707	0.823799	chr1	RCAN3	protein_coding
ENSG00000116514	cg12815354	rs12075604	0.823953	chr1	RNF19B	protein_coding
ENSG00000117602	cg04095045	rs2050070	0.823995	chr1	RCAN3	protein_coding
ENSG00000131238	cg00695362	rs3131654	0.824029	chr1	PPT1	protein_coding
ENSG00000143398	cg21828982	rs182830202	0.824037	chr1	PIP5K1A	protein_coding
ENSG00000142632	cg03585734	rs1780609	0.824069	chr1	ARHGEF19	protein_coding
ENSG00000117602	cg08518475	rs195709	0.824079	chr1	RCAN3	protein_coding
ENSG00000229444	cg04693106	rs76760124	0.824105	chr1	RP11-184I16.4	antisense
ENSG00000268869	cg27540189	rs113099533	0.82411	chr1	ESPNP	transcribed_unprocessed_pseudogene
ENSG00000085832	cg16001451	rs148648502	0.824163	chr1	EPS15	protein_coding
ENSG00000188783	cg04788534	rs6702882	0.824224	chr1	PRELP	protein_coding
ENSG00000090432	cg26474473	rs10916714	0.82426	chr1	MUL1	protein_coding
ENSG00000117242	cg17903275	rs3790743	0.824263	chr1	PINK1-AS	antisense
ENSG00000176022	cg05527507	rs6603782	0.82435	chr1	B3GALT6	protein_coding
ENSG00000181754	cg16315020	rs9440550	0.824455	chr1	AMIGO1	protein_coding
ENSG00000189171	cg13946767	rs9729773	0.824468	chr1	S100A13	protein_coding
ENSG00000271853	cg01347250	rs35890519	0.824623	chr1	RP1-178F15.5	processed_transcript
ENSG00000080947	cg09690283	rs4595409	0.824626	chr1	CROCCP3	transcribed_unprocessed_pseudogene
ENSG00000185220	cg09506600	rs28684663	0.824657	chr1	PGBD2	protein_coding
ENSG00000215845	cg20012024	rs1556259	0.824721	chr1	TSTD1	protein_coding
ENSG00000237975	cg18273593	rs35058813	0.824848	chr1	FLG-AS1	antisense
ENSG00000271853	cg27469660	rs35760493	0.824863	chr1	RP1-178F15.5	processed_transcript
ENSG00000215915	cg17507949	rs1781137	0.824949	chr1	ATAD3C	protein_coding
ENSG00000181873	cg19025525	rs10916277	0.824961	chr1	IBA57	protein_coding
ENSG00000080947	cg23269169	rs7545418	0.824984	chr1	CROCCP3	transcribed_unprocessed_pseudogene
ENSG00000215915	cg21107210	rs2843158	0.825065	chr1	ATAD3C	protein_coding
ENSG00000215845	cg00945666	rs1556260	0.825109	chr1	TSTD1	protein_coding
ENSG00000196187	cg07193504	rs12563243	0.825148	chr1	TMEM63A	protein_coding
ENSG00000132676	cg21199495	rs1106236	0.825156	chr1	DAP3	protein_coding
ENSG00000058668	cg11786870	rs143423078	0.82518	chr1	ATP2B4	protein_coding
ENSG00000142949	cg00053617	rs2367617	0.825198	chr1	PTPRF	protein_coding
ENSG00000118298	cg20006164	rs61819386	0.825246	chr1	CA14	protein_coding
ENSG00000126091	cg06322035	rs12024345	0.825269	chr1	ST3GAL3	protein_coding
ENSG00000207513	cg02375669	rs113847540	0.825398	chr1	RNU1-3	snRNA
ENSG00000160058	cg08859095	rs2273376	0.825472	chr1	BSDC1	protein_coding
ENSG00000160058	cg12064008	rs2273376	0.825569	chr1	BSDC1	protein_coding
ENSG00000158793	cg25720371	rs36123104	0.82565	chr1	NIT1	protein_coding
ENSG00000066322	cg08075269	rs2992037	0.825684	chr1	ELOVL1	protein_coding
ENSG00000162910	cg06895665	rs12408826	0.825692	chr1	MRPL55	protein_coding
ENSG00000181873	cg06786773	rs10916277	0.825692	chr1	IBA57	protein_coding
ENSG00000198520	cg03044096	rs4660821	0.825755	chr1	C1orf228	protein_coding
ENSG00000133069	cg08326593	rs1668871	0.825926	chr1	TMCC2	protein_coding
ENSG00000225828	cg01627483	rs111931107	0.826034	chr1	FAM229A	protein_coding
ENSG00000080947	cg14981532	rs139452064	0.826104	chr1	CROCCP3	transcribed_unprocessed_pseudogene
ENSG00000143195	cg25503136	rs6660754	0.826104	chr1	ILDR2	protein_coding
ENSG00000196071	cg08868915	rs7368310	0.826177	chr1	OR2L13	protein_coding
ENSG00000117305	cg11081247	rs2473375	0.826185	chr1	HMGCL	protein_coding
ENSG00000271853	cg02331910	rs35760493	0.82625	chr1	RP1-178F15.5	processed_transcript
ENSG00000184313	cg15258974	rs7548057	0.82626	chr1	MROH7	protein_coding
ENSG00000160058	cg14167389	rs115307537	0.826353	chr1	BSDC1	protein_coding
ENSG00000235098	cg20300707	rs2649610	0.826375	chr1	ANKRD65	protein_coding
ENSG00000207513	cg16109817	rs146556192	0.82642	chr1	RNU1-3	snRNA
ENSG00000143158	cg25949191	rs60975248	0.826541	chr1	MPC2	protein_coding
ENSG00000207513	cg10321393	rs146556192	0.82657	chr1	RNU1-3	snRNA
ENSG00000271723	cg17823561	rs300270	0.826572	chr1	MROH7-TTC4	protein_coding
ENSG00000189339	cg13298359	rs12566205	0.826601	chr1	SLC35E2B	protein_coding
ENSG00000160058	cg21172540	rs72652105	0.826689	chr1	BSDC1	protein_coding
ENSG00000283495	cg14855972	rs9887771	0.826745	chr1	AC096949.1	protein_coding
ENSG00000272030	cg22861691	rs10908848	0.82675	chr1	RP1-178F15.4	antisense
ENSG00000196071	cg16593812	rs6701018	0.826799	chr1	OR2L13	protein_coding
ENSG00000088280	cg12023170	rs2077066	0.826818	chr1	ASAP3	protein_coding
ENSG00000143195	cg03433241	rs11576904	0.826851	chr1	ILDR2	protein_coding
ENSG00000235501	cg10607462	rs76032537	0.826876	chr1	RP4-639F20.1	antisense
ENSG00000174529	cg23362667	rs10793726	0.826897	chr1	TMEM81	protein_coding
ENSG00000116906	cg17034966	rs11122486	0.826921	chr1	GNPAT	protein_coding
ENSG00000176022	cg14324200	rs6603782	0.827074	chr1	B3GALT6	protein_coding
ENSG00000121905	cg05695699	rs41263989	0.827144	chr1	HPCA	protein_coding
ENSG00000243709	cg25629409	rs76889922	0.827318	chr1	LEFTY1	protein_coding
ENSG00000080947	cg02739641	rs140127045	0.827347	chr1	CROCCP3	transcribed_unprocessed_pseudogene
ENSG00000160072	cg15513868	rs1781149	0.827443	chr1	ATAD3B	protein_coding
ENSG00000215845	cg27180868	rs1556260	0.827529	chr1	TSTD1	protein_coding
ENSG00000162688	cg14855972	rs7543433	0.827633	chr1	AGL	protein_coding
ENSG00000169914	cg03470939	rs76946123	0.827671	chr1	OTUD3	protein_coding
ENSG00000227533	cg16200077	rs710214	0.827755	chr1	SLC2A1-AS1	lincRNA
ENSG00000037637	cg05059632	rs11260710	0.827859	chr1	FBXO42	protein_coding
ENSG00000162585	cg00391668	rs3128294	0.827913	chr1	FAAP20	protein_coding
ENSG00000117013	cg12627726	rs60237568	0.828061	chr1	KCNQ4	protein_coding
ENSG00000158109	cg00930781	rs3034639	0.828131	chr1	TPRG1L	protein_coding
ENSG00000164002	cg12075306	rs6699445	0.828162	chr1	EXO5	protein_coding
ENSG00000215845	cg11731300	rs1556259	0.828283	chr1	TSTD1	protein_coding
ENSG00000085832	cg16193299	rs77236920	0.828387	chr1	EPS15	protein_coding
ENSG00000185495	cg08742135	rs851203	0.828548	chr1	RP11-504P24.3	transcribed_unprocessed_pseudogene
ENSG00000203663	cg04353581	rs6701018	0.829	chr1	OR2L2	protein_coding
ENSG00000171793	cg18186394	rs61320636	0.829151	chr1	CTPS1	protein_coding
ENSG00000242485	cg16903000	rs2799066	0.82927	chr1	MRPL20	protein_coding
ENSG00000189339	cg12222277	rs400132	0.829319	chr1	SLC35E2B	protein_coding
ENSG00000118292	cg26738728	rs4926418	0.829347	chr1	C1orf54	protein_coding
ENSG00000229444	cg04899180	rs78050663	0.829378	chr1	RP11-184I16.4	antisense
ENSG00000215908	cg22050733	rs142266983	0.829458	chr1	CROCCP2	transcribed_unprocessed_pseudogene
ENSG00000271853	cg01347250	rs35760493	0.829499	chr1	RP1-178F15.5	processed_transcript
ENSG00000178922	cg07517557	rs56349810	0.829583	chr1	HYI	protein_coding
ENSG00000242485	cg15688253	rs34442823	0.829634	chr1	MRPL20	protein_coding
ENSG00000163131	cg20817941	rs6587520	0.82989	chr1	CTSS	protein_coding
ENSG00000187147	cg23014221	rs77468496	0.829903	chr1	RNF220	protein_coding
ENSG00000117305	cg13894747	rs10903090	0.829907	chr1	HMGCL	protein_coding
ENSG00000117408	cg19406481	rs116119000	0.829939	chr1	IPO13	protein_coding
ENSG00000207005	cg21860499	rs113847540	0.830008	chr1	RNU1-2	snRNA
ENSG00000118298	cg03851496	rs147248456	0.830038	chr1	CA14	protein_coding
ENSG00000181873	cg23231462	rs10753445	0.830234	chr1	IBA57	protein_coding
ENSG00000272145	cg02495604	rs7549005	0.830238	chr1	NFYC-AS1	antisense
ENSG00000225828	cg14167389	rs12135475	0.830249	chr1	FAM229A	protein_coding
ENSG00000158769	cg06210630	rs6665815	0.830342	chr1	F11R	protein_coding
ENSG00000121310	cg09161043	rs6667002	0.830388	chr1	ECHDC2	protein_coding
ENSG00000206652	cg19470726	rs113847540	0.830401	chr1	RNU1-1	snRNA
ENSG00000162433	cg12752586	rs111928305	0.830427	chr1	AK4	protein_coding
ENSG00000159189	cg13357518	rs187509586	0.830636	chr1	C1QC	protein_coding
ENSG00000163357	cg17383186	rs112559935	0.83065	chr1	DCST1	protein_coding
ENSG00000215915	cg10143960	rs1312568	0.830655	chr1	ATAD3C	protein_coding
ENSG00000189266	cg26856289	rs75910560	0.830661	chr1	PNRC2	protein_coding
ENSG00000164002	cg10206828	rs7549375	0.830703	chr1	EXO5	protein_coding
ENSG00000143369	cg25686336	rs77444832	0.830721	chr1	ECM1	protein_coding
ENSG00000158161	cg25273602	rs116836168	0.830791	chr1	EYA3	protein_coding
ENSG00000188643	cg25638698	rs6427631	0.830847	chr1	S100A16	protein_coding
ENSG00000171603	cg06456464	rs72855780	0.83091	chr1	CLSTN1	protein_coding
ENSG00000158008	cg01568397	rs4253906	0.830939	chr1	EXTL1	protein_coding
ENSG00000158769	cg23055938	rs34339899	0.831265	chr1	F11R	protein_coding
ENSG00000207389	cg16109817	rs146556192	0.831454	chr1	RNU1-4	snRNA
ENSG00000143162	cg24693760	rs16859159	0.831489	chr1	CREG1	protein_coding
ENSG00000207389	cg02375669	rs113847540	0.831509	chr1	RNU1-4	snRNA
ENSG00000207389	cg10321393	rs146556192	0.831606	chr1	RNU1-4	snRNA
ENSG00000179163	cg16976865	rs2503003	0.831866	chr1	FUCA1	protein_coding
ENSG00000133069	cg21545522	rs1668871	0.831872	chr1	TMCC2	protein_coding
ENSG00000158769	cg13567636	rs34339899	0.832019	chr1	F11R	protein_coding
ENSG00000116497	cg10023872	rs145761115	0.832116	chr1	S100PBP	protein_coding
ENSG00000169224	cg02713706	rs2141544	0.832371	chr1	GCSAML	protein_coding
ENSG00000219481	cg04861793	rs2985125	0.832384	chr1	NBPF1	protein_coding
ENSG00000154358	cg23231462	rs10753445	0.832457	chr1	OBSCN	protein_coding
ENSG00000271853	cg26148377	rs1046381	0.832473	chr1	RP1-178F15.5	processed_transcript
ENSG00000133059	cg00857998	rs11577406	0.832488	chr1	DSTYK	protein_coding
ENSG00000158769	cg04981885	rs34339899	0.832561	chr1	F11R	protein_coding
ENSG00000158109	cg15397472	rs6663736	0.83264	chr1	TPRG1L	protein_coding
ENSG00000121905	cg03125875	rs4951771	0.832758	chr1	HPCA	protein_coding
ENSG00000169224	cg05639522	rs2141544	0.832901	chr1	GCSAML	protein_coding
ENSG00000271853	cg26548293	rs1046381	0.833153	chr1	RP1-178F15.5	processed_transcript
ENSG00000226029	cg07194829	rs2610597	0.833431	chr1	RP4-798A10.2	lincRNA
ENSG00000116514	cg04906435	rs194647	0.833518	chr1	RNF19B	protein_coding
ENSG00000163393	cg24682551	rs12144702	0.833528	chr1	SLC22A15	protein_coding
ENSG00000203663	cg14820154	rs6701018	0.833639	chr1	OR2L2	protein_coding
ENSG00000196187	cg09025960	rs360078	0.833809	chr1	TMEM63A	protein_coding
ENSG00000220785	cg12206571	rs72666741	0.833993	chr1	MTMR9LP	transcribed_unprocessed_pseudogene
ENSG00000135744	cg02931783	rs79410167	0.834152	chr1	AGT	protein_coding
ENSG00000188643	cg16282977	rs9726753	0.834445	chr1	S100A16	protein_coding
ENSG00000280114	cg16466254	rs2235932	0.834465	chr1	RP5-875O13.7	unprocessed_pseudogene
ENSG00000187815	cg09825488	rs6600339	0.834468	chr1	ZFP69	protein_coding
ENSG00000169224	cg11166453	rs2141544	0.834474	chr1	GCSAML	protein_coding
ENSG00000171621	cg13131263	rs139022564	0.834484	chr1	SPSB1	protein_coding
ENSG00000154358	cg14159230	rs35741505	0.834662	chr1	OBSCN	protein_coding
ENSG00000130770	cg10846285	rs12138440	0.834725	chr1	ATPIF1	protein_coding
ENSG00000158109	cg05790380	rs13328662	0.834765	chr1	TPRG1L	protein_coding
ENSG00000132676	cg21199495	rs2364408	0.834778	chr1	DAP3	protein_coding
ENSG00000184908	cg17179842	rs150833594	0.834925	chr1	CLCNKB	protein_coding
ENSG00000169224	cg22374474	rs2141544	0.835025	chr1	GCSAML	protein_coding
ENSG00000004455	cg13690407	rs10914639	0.835231	chr1	AK2	protein_coding
ENSG00000185499	cg16848098	rs41264939	0.835269	chr1	MUC1	protein_coding
ENSG00000066185	cg06885757	rs11210504	0.83529	chr1	ZMYND12	protein_coding
ENSG00000169224	cg26060667	rs2141544	0.835302	chr1	GCSAML	protein_coding
ENSG00000157191	cg04803684	rs12031735	0.835328	chr1	NECAP2	protein_coding
ENSG00000188643	cg25686513	rs79204205	0.835399	chr1	S100A16	protein_coding
ENSG00000188643	cg09895009	rs79204205	0.835406	chr1	S100A16	protein_coding
ENSG00000169224	cg21399703	rs2141544	0.835451	chr1	GCSAML	protein_coding
ENSG00000143786	cg17156011	rs112209045	0.835454	chr1	CNIH3	protein_coding
ENSG00000162461	cg19916794	rs1108185	0.835505	chr1	SLC25A34	protein_coding
ENSG00000169224	cg20771596	rs2141544	0.835624	chr1	GCSAML	protein_coding
ENSG00000122218	cg22891465	rs111847432	0.835713	chr1	COPA	protein_coding
ENSG00000122176	cg21089380	rs4971252	0.83575	chr1	FMOD	protein_coding
ENSG00000189339	cg01229567	rs9442430	0.835782	chr1	SLC35E2B	protein_coding
ENSG00000143434	cg06035839	rs12088941	0.835821	chr1	SEMA6C	protein_coding
ENSG00000176022	cg09870910	rs1153105	0.835851	chr1	B3GALT6	protein_coding
ENSG00000271853	cg16282977	rs35760493	0.835957	chr1	RP1-178F15.5	processed_transcript
ENSG00000116514	cg10120255	rs194646	0.836065	chr1	RNF19B	protein_coding
ENSG00000116157	cg01400822	rs6588431	0.83612	chr1	GPX7	protein_coding
ENSG00000122176	cg11914824	rs4971252	0.836246	chr1	FMOD	protein_coding
ENSG00000143252	cg14978304	rs139869240	0.836278	chr1	SDHC	protein_coding
ENSG00000185220	cg12080717	rs11485458	0.836312	chr1	PGBD2	protein_coding
ENSG00000188643	cg11276308	rs79204205	0.836414	chr1	S100A16	protein_coding
ENSG00000143369	cg12479415	rs77444832	0.836435	chr1	ECM1	protein_coding
ENSG00000116157	cg03452047	rs6588431	0.836548	chr1	GPX7	protein_coding
ENSG00000116514	cg14806693	rs194647	0.836653	chr1	RNF19B	protein_coding
ENSG00000196071	cg20389361	rs7368310	0.836798	chr1	OR2L13	protein_coding
ENSG00000272491	cg13513652	rs11205462	0.836799	chr1	RP5-1024N4.4	antisense
ENSG00000143434	cg11717150	rs3806387	0.836868	chr1	SEMA6C	protein_coding
ENSG00000121904	cg12745289	rs75425953	0.8369	chr1	CSMD2	protein_coding
ENSG00000099260	cg15240619	rs72732426	0.836932	chr1	PALMD	protein_coding
ENSG00000242485	cg02416993	rs1171	0.836941	chr1	MRPL20	protein_coding
ENSG00000162729	cg08918937	rs10643819	0.837074	chr1	IGSF8	protein_coding
ENSG00000179163	cg04160030	rs12404321	0.837144	chr1	FUCA1	protein_coding
ENSG00000203663	cg16593812	rs6701018	0.837242	chr1	OR2L2	protein_coding
ENSG00000179163	cg26873754	rs3003332	0.837308	chr1	FUCA1	protein_coding
ENSG00000066185	cg26337430	rs192338557	0.837355	chr1	ZMYND12	protein_coding
ENSG00000179163	cg05560725	rs2070953	0.837423	chr1	FUCA1	protein_coding
ENSG00000203663	cg01905420	rs139333060	0.837468	chr1	OR2L2	protein_coding
ENSG00000179163	cg12626384	rs2070954	0.837512	chr1	FUCA1	protein_coding
ENSG00000162729	cg11950577	rs34401812	0.837552	chr1	IGSF8	protein_coding
ENSG00000157873	cg13104257	rs1065247	0.83759	chr1	TNFRSF14	protein_coding
ENSG00000189171	cg02331910	rs9729773	0.837615	chr1	S100A13	protein_coding
ENSG00000119283	cg01960686	rs6659596	0.837627	chr1	TRIM67	protein_coding
ENSG00000197965	cg10325912	rs72697771	0.837828	chr1	MPZL1	protein_coding
ENSG00000122176	cg07972572	rs59815839	0.837846	chr1	FMOD	protein_coding
ENSG00000219481	cg00156947	rs2985125	0.837862	chr1	NBPF1	protein_coding
ENSG00000116857	cg27058077	rs6427880	0.837874	chr1	TMEM9	protein_coding
ENSG00000090432	cg05278081	rs1152990	0.838022	chr1	MUL1	protein_coding
ENSG00000126091	cg23930257	rs114361356	0.838025	chr1	ST3GAL3	protein_coding
ENSG00000196071	cg14820154	rs61857507	0.83808	chr1	OR2L13	protein_coding
ENSG00000179163	cg07568418	rs2070954	0.838082	chr1	FUCA1	protein_coding
ENSG00000162585	cg09612202	rs56051051	0.8381	chr1	FAAP20	protein_coding
ENSG00000179163	cg10953003	rs2503003	0.83811	chr1	FUCA1	protein_coding
ENSG00000179163	cg24792360	rs2503003	0.838157	chr1	FUCA1	protein_coding
ENSG00000117408	cg06792911	rs2428956	0.838173	chr1	IPO13	protein_coding
ENSG00000179163	cg19367136	rs74937660	0.838191	chr1	FUCA1	protein_coding
ENSG00000176022	cg10784110	rs190796582	0.838196	chr1	B3GALT6	protein_coding
ENSG00000121454	cg03732293	rs146187127	0.838227	chr1	LHX4	protein_coding
ENSG00000189266	cg12569845	rs75910560	0.838242	chr1	PNRC2	protein_coding
ENSG00000179163	cg22614927	rs12133557	0.838253	chr1	FUCA1	protein_coding
ENSG00000135766	cg26391634	rs183028638	0.838267	chr1	EGLN1	protein_coding
ENSG00000143369	cg23098012	rs7536239	0.838315	chr1	ECM1	protein_coding
ENSG00000179163	cg22077361	rs143150363	0.838331	chr1	FUCA1	protein_coding
ENSG00000121454	cg00255405	rs146187127	0.838401	chr1	LHX4	protein_coding
ENSG00000189266	cg00693915	rs55899369	0.838409	chr1	PNRC2	protein_coding
ENSG00000219481	cg11079989	rs12088911	0.838448	chr1	NBPF1	protein_coding
ENSG00000179163	cg12084952	rs143150363	0.838492	chr1	FUCA1	protein_coding
ENSG00000179163	cg16976865	rs2503003	0.838531	chr1	FUCA1	protein_coding
ENSG00000117500	cg00325112	rs1057257	0.838629	chr1	TMED5	protein_coding
ENSG00000126091	cg25041176	rs114361356	0.838651	chr1	ST3GAL3	protein_coding
ENSG00000122176	cg01739509	rs16851364	0.838668	chr1	FMOD	protein_coding
ENSG00000126091	cg11837102	rs114361356	0.838928	chr1	ST3GAL3	protein_coding
ENSG00000154358	cg14377781	rs910494	0.839162	chr1	OBSCN	protein_coding
ENSG00000189266	cg03384426	rs75910560	0.839202	chr1	PNRC2	protein_coding
ENSG00000235131	cg13205528	rs6669612	0.839244	chr1	RP5-1092A11.2	antisense
ENSG00000189266	cg22358066	rs75910560	0.839392	chr1	PNRC2	protein_coding
ENSG00000189266	cg27409662	rs75910560	0.839457	chr1	PNRC2	protein_coding
ENSG00000116514	cg16007395	rs520309	0.839518	chr1	RNF19B	protein_coding
ENSG00000084623	cg21324883	rs35564360	0.839598	chr1	EIF3I	protein_coding
ENSG00000090432	cg17714127	rs1152990	0.839878	chr1	MUL1	protein_coding
ENSG00000272420	cg20155988	rs12069588	0.840023	chr1	RP4-740C4.7	sense_intronic
ENSG00000207005	cg02375669	rs113847540	0.840066	chr1	RNU1-2	snRNA
ENSG00000204219	cg07356011	rs946266	0.840072	chr1	TCEA3	protein_coding
ENSG00000116157	cg23065788	rs946155	0.840215	chr1	GPX7	protein_coding
ENSG00000142632	cg11799650	rs1780609	0.840228	chr1	ARHGEF19	protein_coding
ENSG00000215845	cg11578532	rs1556260	0.84036	chr1	TSTD1	protein_coding
ENSG00000188643	cg00963799	rs79204205	0.840394	chr1	S100A16	protein_coding
ENSG00000001460	cg15741663	rs72654625	0.840459	chr1	STPG1	protein_coding
ENSG00000116678	cg03514351	rs9436746	0.840461	chr1	LEPR	protein_coding
ENSG00000133059	cg00977805	rs76762905	0.84051	chr1	DSTYK	protein_coding
ENSG00000122218	cg10787292	rs111847432	0.840537	chr1	COPA	protein_coding
ENSG00000143771	cg16000154	rs10916606	0.840559	chr1	CNIH4	protein_coding
ENSG00000158109	cg07330442	rs12757620	0.840575	chr1	TPRG1L	protein_coding
ENSG00000117862	cg10782081	rs77272464	0.840576	chr1	TXNDC12	protein_coding
ENSG00000236200	cg08959526	rs114361356	0.840622	chr1	KDM4A-AS1	antisense
ENSG00000126091	cg20452714	rs12120287	0.840719	chr1	ST3GAL3	protein_coding
ENSG00000242485	cg25234611	rs34442823	0.840906	chr1	MRPL20	protein_coding
ENSG00000189266	cg16924704	rs75910560	0.840962	chr1	PNRC2	protein_coding
ENSG00000189339	cg26163375	rs143038747	0.840987	chr1	SLC35E2B	protein_coding
ENSG00000215845	cg12426196	rs1556260	0.840998	chr1	TSTD1	protein_coding
ENSG00000180098	cg14378564	rs113156082	0.841067	chr1	TRNAU1AP	protein_coding
ENSG00000142632	cg20050767	rs1780609	0.841213	chr1	ARHGEF19	protein_coding
ENSG00000049239	cg06988251	rs9435144	0.841252	chr1	H6PD	protein_coding
ENSG00000143409	cg17353890	rs145902781	0.841279	chr1	FAM63A	protein_coding
ENSG00000143786	cg16000154	rs6672859	0.841374	chr1	CNIH3	protein_coding
ENSG00000134686	cg03331207	rs4653002	0.841441	chr1	PHC2	protein_coding
ENSG00000126091	cg23848055	rs114361356	0.841466	chr1	ST3GAL3	protein_coding
ENSG00000180098	cg03375056	rs183647845	0.841579	chr1	TRNAU1AP	protein_coding
ENSG00000163131	cg25872684	rs143185028	0.84166	chr1	CTSS	protein_coding
ENSG00000271853	cg07898899	rs35760493	0.841672	chr1	RP1-178F15.5	processed_transcript
ENSG00000188643	cg19849754	rs9700179	0.841703	chr1	S100A16	protein_coding
ENSG00000237950	cg23954153	rs6680421	0.841764	chr1	RP11-7O11.3	antisense
ENSG00000162913	cg00779928	rs4607844	0.841793	chr1	C1orf145	protein_coding
ENSG00000143387	cg09462224	rs56303945	0.841911	chr1	CTSK	protein_coding
ENSG00000203663	cg15595212	rs6701018	0.84196	chr1	OR2L2	protein_coding
ENSG00000237975	cg07252308	rs140771909	0.841999	chr1	FLG-AS1	antisense
ENSG00000196071	cg10034335	rs61857507	0.84204	chr1	OR2L13	protein_coding
ENSG00000215845	cg00446235	rs1556260	0.84212	chr1	TSTD1	protein_coding
ENSG00000189266	cg04021497	rs75910560	0.842131	chr1	PNRC2	protein_coding
ENSG00000162377	cg01599460	rs681865	0.84238	chr1	COA7	protein_coding
ENSG00000188643	cg16348003	rs11548102	0.842439	chr1	S100A16	protein_coding
ENSG00000215845	cg16097078	rs16831388	0.842464	chr1	TSTD1	protein_coding
ENSG00000037637	cg17463745	rs11260710	0.842482	chr1	FBXO42	protein_coding
ENSG00000203663	cg08130084	rs6701018	0.842575	chr1	OR2L2	protein_coding
ENSG00000160097	cg21774018	rs11576800	0.84275	chr1	FNDC5	protein_coding
ENSG00000176022	cg08647342	rs3107125	0.842854	chr1	B3GALT6	protein_coding
ENSG00000066135	cg23028072	rs142156869	0.842859	chr1	KDM4A	protein_coding
ENSG00000203663	cg09506600	rs6701018	0.843115	chr1	OR2L2	protein_coding
ENSG00000143771	cg21058413	rs12740255	0.843218	chr1	CNIH4	protein_coding
ENSG00000219481	cg26664206	rs281826	0.84323	chr1	NBPF1	protein_coding
ENSG00000271853	cg02873163	rs35760493	0.843233	chr1	RP1-178F15.5	processed_transcript
ENSG00000189171	cg06562291	rs11497739	0.843288	chr1	S100A13	protein_coding
ENSG00000196071	cg09598075	rs61857507	0.843341	chr1	OR2L13	protein_coding
ENSG00000159208	cg26065909	rs115422057	0.843491	chr1	CIART	protein_coding
ENSG00000143437	cg06061967	rs113211472	0.843723	chr1	ARNT	protein_coding
ENSG00000181754	cg22461780	rs17358800	0.843767	chr1	AMIGO1	protein_coding
ENSG00000116329	cg20801348	rs138045396	0.843842	chr1	OPRD1	protein_coding
ENSG00000188643	cg08477332	rs9726753	0.843858	chr1	S100A16	protein_coding
ENSG00000121905	cg17327404	rs7548570	0.843996	chr1	HPCA	protein_coding
ENSG00000143162	cg14617280	rs57323848	0.844074	chr1	CREG1	protein_coding
ENSG00000235098	cg02668764	rs3766165	0.844091	chr1	ANKRD65	protein_coding
ENSG00000133069	cg00142815	rs1172113	0.844175	chr1	TMCC2	protein_coding
ENSG00000143162	cg19948045	rs57323848	0.844332	chr1	CREG1	protein_coding
ENSG00000204138	cg09605828	rs6598920	0.844341	chr1	PHACTR4	protein_coding
ENSG00000126091	cg05180596	rs114361356	0.844437	chr1	ST3GAL3	protein_coding
ENSG00000179743	cg16109817	rs6666548	0.844448	chr1	FLJ37453	antisense
ENSG00000160097	cg06946551	rs12070847	0.844529	chr1	FNDC5	protein_coding
ENSG00000127054	cg15034659	rs3121821	0.8447	chr1	CPSF3L	protein_coding
ENSG00000126091	cg11958827	rs114361356	0.844759	chr1	ST3GAL3	protein_coding
ENSG00000133069	cg13303403	rs1172113	0.844765	chr1	TMCC2	protein_coding
ENSG00000243709	cg16487577	rs74340154	0.844771	chr1	LEFTY1	protein_coding
ENSG00000126091	cg16047291	rs114361356	0.844918	chr1	ST3GAL3	protein_coding
ENSG00000188783	cg23371584	rs12141919	0.844973	chr1	PRELP	protein_coding
ENSG00000126091	cg08959526	rs114361356	0.845137	chr1	ST3GAL3	protein_coding
ENSG00000004455	cg04306220	rs56790183	0.845227	chr1	AK2	protein_coding
ENSG00000182004	cg16223596	rs12402865	0.845418	chr1	SNRPE	protein_coding
ENSG00000117505	cg00049156	rs10782959	0.845638	chr1	DR1	protein_coding
ENSG00000176022	cg11837076	rs3107125	0.84568	chr1	B3GALT6	protein_coding
ENSG00000117505	cg06211375	rs80251022	0.845814	chr1	DR1	protein_coding
ENSG00000143819	cg14849071	rs111701809	0.845871	chr1	EPHX1	protein_coding
ENSG00000229444	cg19247548	rs78050663	0.846009	chr1	RP11-184I16.4	antisense
ENSG00000116675	cg03054432	rs942861	0.846062	chr1	DNAJC6	protein_coding
ENSG00000125945	cg07356011	rs946266	0.846123	chr1	ZNF436	protein_coding
ENSG00000185499	cg14508643	rs150713468	0.846362	chr1	MUC1	protein_coding
ENSG00000158109	cg21262776	rs13328662	0.84644	chr1	TPRG1L	protein_coding
ENSG00000162585	cg09560161	rs2503705	0.846443	chr1	FAAP20	protein_coding
ENSG00000182004	cg06642677	rs11240607	0.84651	chr1	SNRPE	protein_coding
ENSG00000158109	cg26864297	rs13328662	0.846634	chr1	TPRG1L	protein_coding
ENSG00000117013	cg10234579	rs727147	0.846727	chr1	KCNQ4	protein_coding
ENSG00000163545	cg00407231	rs9793526	0.846746	chr1	NUAK2	protein_coding
ENSG00000189171	cg01572735	rs72698169	0.846804	chr1	S100A13	protein_coding
ENSG00000215883	cg01902939	rs140708162	0.846882	chr1	CYB5RL	protein_coding
ENSG00000066135	cg25041176	rs142156869	0.846971	chr1	KDM4A	protein_coding
ENSG00000207389	cg12681623	rs114702817	0.847136	chr1	RNU1-4	snRNA
ENSG00000122218	cg00446235	rs111847432	0.847186	chr1	COPA	protein_coding
ENSG00000154358	cg15514896	rs35741505	0.847203	chr1	OBSCN	protein_coding
ENSG00000080947	cg15036616	rs149590665	0.847239	chr1	CROCCP3	transcribed_unprocessed_pseudogene
ENSG00000189266	cg22359362	rs72540327	0.847282	chr1	PNRC2	protein_coding
ENSG00000235098	cg10380643	rs1781135	0.847353	chr1	ANKRD65	protein_coding
ENSG00000196071	cg16717532	rs61857507	0.84758	chr1	OR2L13	protein_coding
ENSG00000281406	cg03143531	rs3738744	0.847587	chr1	BLACAT1	lincRNA
ENSG00000143786	cg21058413	rs12738799	0.847629	chr1	CNIH3	protein_coding
ENSG00000066135	cg05180596	rs142156869	0.847647	chr1	KDM4A	protein_coding
ENSG00000169213	cg13221868	rs12407301	0.847706	chr1	RAB3B	protein_coding
ENSG00000143162	cg01169725	rs57323848	0.847782	chr1	CREG1	protein_coding
ENSG00000248485	cg21091503	rs12033011	0.847826	chr1	PCP4L1	protein_coding
ENSG00000204219	cg12023170	rs36007732	0.84812	chr1	TCEA3	protein_coding
ENSG00000196071	cg15595212	rs61857507	0.848122	chr1	OR2L13	protein_coding
ENSG00000162585	cg16022081	rs56051051	0.848216	chr1	FAAP20	protein_coding
ENSG00000066135	cg16047291	rs142156869	0.848316	chr1	KDM4A	protein_coding
ENSG00000249087	cg22502492	rs638722	0.848421	chr1	ZNF436-AS1	antisense
ENSG00000219481	cg06947191	rs2985125	0.848481	chr1	NBPF1	protein_coding
ENSG00000143622	cg15466245	rs111310167	0.848528	chr1	RIT1	protein_coding
ENSG00000117425	cg07343611	rs137942576	0.848622	chr1	PTCH2	protein_coding
ENSG00000196071	cg27483432	rs61857507	0.848654	chr1	OR2L13	protein_coding
ENSG00000261168	cg12582028	rs1879533	0.84873	chr1	RP11-68I18.10	sense_overlapping
ENSG00000176022	cg16601494	rs77994686	0.848739	chr1	B3GALT6	protein_coding
ENSG00000189171	cg11596404	rs9729773	0.848793	chr1	S100A13	protein_coding
ENSG00000207005	cg08887581	rs1763612	0.848859	chr1	RNU1-2	snRNA
ENSG00000001460	cg26890309	rs679429	0.849031	chr1	STPG1	protein_coding
ENSG00000163125	cg08130307	rs12753380	0.849096	chr1	RPRD2	protein_coding
ENSG00000169213	cg10884068	rs2994536	0.849103	chr1	RAB3B	protein_coding
ENSG00000196071	cg25983401	rs61857507	0.849112	chr1	OR2L13	protein_coding
ENSG00000280114	cg01467503	rs10927860	0.849201	chr1	RP5-875O13.7	unprocessed_pseudogene
ENSG00000203663	cg02104434	rs114912909	0.849205	chr1	OR2L2	protein_coding
ENSG00000227533	cg00290994	rs78411500	0.849243	chr1	SLC2A1-AS1	lincRNA
ENSG00000189171	cg11915664	rs9729773	0.849251	chr1	S100A13	protein_coding
ENSG00000196071	cg10886419	rs61857507	0.849373	chr1	OR2L13	protein_coding
ENSG00000188643	cg11596404	rs76099002	0.849513	chr1	S100A16	protein_coding
ENSG00000143162	cg17936236	rs57323848	0.84963	chr1	CREG1	protein_coding
ENSG00000142937	cg17536413	rs1637284	0.849683	chr1	RPS8	protein_coding
ENSG00000143458	cg06035839	rs113869543	0.849753	chr1	GABPB2	protein_coding
ENSG00000158769	cg20012024	rs34339899	0.849795	chr1	F11R	protein_coding
ENSG00000206652	cg20696698	rs2018430	0.84983	chr1	RNU1-1	snRNA
ENSG00000203663	cg08861456	rs6701018	0.849836	chr1	OR2L2	protein_coding
ENSG00000049239	cg04566694	rs9435144	0.849898	chr1	H6PD	protein_coding
ENSG00000133059	cg19092322	rs76762905	0.850028	chr1	DSTYK	protein_coding
ENSG00000189171	cg04077668	rs9729773	0.850034	chr1	S100A13	protein_coding
ENSG00000163393	cg20623690	rs2452551	0.850036	chr1	SLC22A15	protein_coding
ENSG00000261168	cg26714626	rs1879533	0.850207	chr1	RP11-68I18.10	sense_overlapping
ENSG00000116903	cg14660449	rs1411019	0.850236	chr1	EXOC8	protein_coding
ENSG00000133069	cg02716605	rs1172113	0.850316	chr1	TMCC2	protein_coding
ENSG00000143811	cg13305444	rs6426538	0.850331	chr1	PYCR2	protein_coding
ENSG00000280114	cg20848377	rs156916	0.850578	chr1	RP5-875O13.7	unprocessed_pseudogene
ENSG00000249087	cg16430505	rs678007	0.850662	chr1	ZNF436-AS1	antisense
ENSG00000162433	cg23523648	rs2889130	0.850674	chr1	AK4	protein_coding
ENSG00000154358	cg14159230	rs35741505	0.85091	chr1	OBSCN	protein_coding
ENSG00000117305	cg21686600	rs974698	0.850983	chr1	HMGCL	protein_coding
ENSG00000207513	cg12681623	rs114702817	0.851064	chr1	RNU1-3	snRNA
ENSG00000204219	cg14122784	rs2849025	0.851252	chr1	TCEA3	protein_coding
ENSG00000131236	cg17103666	rs187268841	0.851284	chr1	CAP1	protein_coding
ENSG00000143369	cg12479415	rs7536239	0.851411	chr1	ECM1	protein_coding
ENSG00000236200	cg16047291	rs114347687	0.851571	chr1	KDM4A-AS1	antisense
ENSG00000189339	cg02625725	rs9442431	0.851802	chr1	SLC35E2B	protein_coding
ENSG00000237950	cg15962314	rs6801	0.851806	chr1	RP11-7O11.3	antisense
ENSG00000143633	cg03987748	rs12036963	0.851895	chr1	C1orf131	protein_coding
ENSG00000196071	cg20507276	rs61857507	0.852059	chr1	OR2L13	protein_coding
ENSG00000237950	cg02329117	rs6801	0.852097	chr1	RP11-7O11.3	antisense
ENSG00000235098	cg00653281	rs1781136	0.852165	chr1	ANKRD65	protein_coding
ENSG00000238142	cg14553527	rs11585710	0.852245	chr1	RP11-108M9.4	lincRNA
ENSG00000189339	cg02668764	rs143038747	0.852271	chr1	SLC35E2B	protein_coding
ENSG00000037637	cg03048488	rs2015352	0.852306	chr1	FBXO42	protein_coding
ENSG00000203865	cg27639056	rs850610	0.852316	chr1	ATP1A1-AS1	processed_transcript
ENSG00000163354	cg00504075	rs2364408	0.85236	chr1	DCST2	protein_coding
ENSG00000143772	cg25469800	rs835662	0.852456	chr1	ITPKB	protein_coding
ENSG00000181873	cg24624353	rs11800309	0.852458	chr1	IBA57	protein_coding
ENSG00000266472	cg24629122	rs16836230	0.852524	chr1	MRPS21	protein_coding
ENSG00000176022	cg06443533	rs35659545	0.852525	chr1	B3GALT6	protein_coding
ENSG00000158793	cg10787292	rs6694881	0.852562	chr1	NIT1	protein_coding
ENSG00000037637	cg03969515	rs35225769	0.852643	chr1	FBXO42	protein_coding
ENSG00000162433	cg06339716	rs3934817	0.85291	chr1	AK4	protein_coding
ENSG00000133069	cg25393376	rs1668871	0.853028	chr1	TMCC2	protein_coding
ENSG00000237975	cg19933610	rs35058813	0.853213	chr1	FLG-AS1	antisense
ENSG00000122218	cg11161846	rs111847432	0.853333	chr1	COPA	protein_coding
ENSG00000143390	cg26738728	rs148412874	0.853378	chr1	RFX5	protein_coding
ENSG00000143819	cg17211296	rs41266231	0.853582	chr1	EPHX1	protein_coding
ENSG00000117500	cg02421543	rs61799471	0.853678	chr1	TMED5	protein_coding
ENSG00000189171	cg12650227	rs145513183	0.853743	chr1	S100A13	protein_coding
ENSG00000198842	cg21693676	rs10918634	0.853896	chr1	DUSP27	protein_coding
ENSG00000272455	cg17507949	rs34817085	0.853915	chr1	RP4-758J18.13	lincRNA
ENSG00000134207	cg20611115	rs35412337	0.854112	chr1	SYT6	protein_coding
ENSG00000163050	cg03307360	rs11582528	0.854158	chr1	ADCK3	protein_coding
ENSG00000143622	cg15466245	rs111310167	0.854255	chr1	RIT1	protein_coding
ENSG00000203663	cg08861456	rs35231679	0.85429	chr1	OR2L2	protein_coding
ENSG00000203663	cg20433858	rs35231679	0.854296	chr1	OR2L2	protein_coding
ENSG00000158109	cg07230639	rs6697769	0.85437	chr1	TPRG1L	protein_coding
ENSG00000280114	cg05059632	rs2863845	0.854378	chr1	RP5-875O13.7	unprocessed_pseudogene
ENSG00000203663	cg20507276	rs35231679	0.854447	chr1	OR2L2	protein_coding
ENSG00000243709	cg25629409	rs74340154	0.854508	chr1	LEFTY1	protein_coding
ENSG00000163354	cg16859077	rs2364408	0.854612	chr1	DCST2	protein_coding
ENSG00000143811	cg04582838	rs6426538	0.854675	chr1	PYCR2	protein_coding
ENSG00000203663	cg10886419	rs35231679	0.854688	chr1	OR2L2	protein_coding
ENSG00000196187	cg17211296	rs12563243	0.854695	chr1	TMEM63A	protein_coding
ENSG00000196071	cg08130084	rs61857507	0.854696	chr1	OR2L13	protein_coding
ENSG00000203663	cg09506600	rs35231679	0.854724	chr1	OR2L2	protein_coding
ENSG00000203663	cg08944170	rs35231679	0.854843	chr1	OR2L2	protein_coding
ENSG00000206652	cg22332106	rs146556192	0.854878	chr1	RNU1-1	snRNA
ENSG00000171603	cg24760690	rs11121497	0.854891	chr1	CLSTN1	protein_coding
ENSG00000143437	cg20817941	rs12568757	0.854911	chr1	ARNT	protein_coding
ENSG00000271723	cg02576601	rs630538	0.854918	chr1	MROH7-TTC4	protein_coding
ENSG00000163349	cg22193404	rs4839349	0.854998	chr1	HIPK1	protein_coding
ENSG00000143387	cg15441434	rs56303945	0.855029	chr1	CTSK	protein_coding
ENSG00000203663	cg03748376	rs35231679	0.855074	chr1	OR2L2	protein_coding
ENSG00000116514	cg10120255	rs518440	0.855196	chr1	RNF19B	protein_coding
ENSG00000186715	cg03660835	rs12146078	0.855213	chr1	MST1L	transcribed_unprocessed_pseudogene
ENSG00000117640	cg11518020	rs190641399	0.855231	chr1	MTFR1L	protein_coding
ENSG00000203663	cg00785941	rs6701018	0.855291	chr1	OR2L2	protein_coding
ENSG00000215908	cg12218389	rs55751345	0.855348	chr1	CROCCP2	transcribed_unprocessed_pseudogene
ENSG00000159208	cg08468904	rs12142278	0.855365	chr1	CIART	protein_coding
ENSG00000157873	cg15151929	rs4648828	0.855391	chr1	TNFRSF14	protein_coding
ENSG00000152382	cg23085466	rs10494448	0.855479	chr1	TADA1	protein_coding
ENSG00000142632	cg27576785	rs2273312	0.855565	chr1	ARHGEF19	protein_coding
ENSG00000133059	cg22936775	rs138662683	0.855701	chr1	DSTYK	protein_coding
ENSG00000116157	cg22129364	rs6588431	0.855717	chr1	GPX7	protein_coding
ENSG00000143537	cg01769968	rs61751623	0.855769	chr1	ADAM15	protein_coding
ENSG00000207005	cg08887581	rs3738637	0.855841	chr1	RNU1-2	snRNA
ENSG00000116157	cg26251270	rs6588431	0.855853	chr1	GPX7	protein_coding
ENSG00000204138	cg03227305	rs521809	0.855923	chr1	PHACTR4	protein_coding
ENSG00000203663	cg08944170	rs6701018	0.855962	chr1	OR2L2	protein_coding
ENSG00000171603	cg15411927	rs11121497	0.856031	chr1	CLSTN1	protein_coding
ENSG00000159208	cg09082263	rs147248456	0.856086	chr1	CIART	protein_coding
ENSG00000229444	cg03822565	rs114361356	0.856093	chr1	RP11-184I16.4	antisense
ENSG00000143387	cg20817941	rs12725667	0.856201	chr1	CTSK	protein_coding
ENSG00000143252	cg25720371	rs77230296	0.856211	chr1	SDHC	protein_coding
ENSG00000197747	cg25525754	rs41267636	0.856225	chr1	S100A10	protein_coding
ENSG00000143374	cg08654379	rs114941413	0.856242	chr1	TARS2	protein_coding
ENSG00000117425	cg14118364	rs115321906	0.856323	chr1	PTCH2	protein_coding
ENSG00000121454	cg03732293	rs146187127	0.856338	chr1	LHX4	protein_coding
ENSG00000203663	cg25983401	rs35231679	0.856345	chr1	OR2L2	protein_coding
ENSG00000133069	cg11170025	rs1668871	0.856375	chr1	TMCC2	protein_coding
ENSG00000121454	cg00255405	rs146187127	0.856379	chr1	LHX4	protein_coding
ENSG00000196071	cg09506600	rs61857507	0.856418	chr1	OR2L13	protein_coding
ENSG00000122176	cg08925398	rs59815839	0.856534	chr1	FMOD	protein_coding
ENSG00000132681	cg00551648	rs860294	0.856552	chr1	ATP1A4	protein_coding
ENSG00000169231	cg24042452	rs12134456	0.856611	chr1	THBS3	protein_coding
ENSG00000160072	cg09172260	rs1153102	0.856663	chr1	ATAD3B	protein_coding
ENSG00000117505	cg01466031	rs2281525	0.856792	chr1	DR1	protein_coding
ENSG00000226029	cg23913963	rs12093260	0.857446	chr1	RP4-798A10.2	lincRNA
ENSG00000237975	cg24529535	rs34428306	0.857463	chr1	FLG-AS1	antisense
ENSG00000249087	cg00677945	rs9699605	0.857648	chr1	ZNF436-AS1	antisense
ENSG00000143157	cg18267943	rs7548191	0.857848	chr1	POGK	protein_coding
ENSG00000116157	cg23272399	rs6588431	0.857849	chr1	GPX7	protein_coding
ENSG00000116157	cg02453146	rs6588431	0.857992	chr1	GPX7	protein_coding
ENSG00000203663	cg10580513	rs6701018	0.858019	chr1	OR2L2	protein_coding
ENSG00000203663	cg08868915	rs6701018	0.858039	chr1	OR2L2	protein_coding
ENSG00000196071	cg08861456	rs61857507	0.858084	chr1	OR2L13	protein_coding
ENSG00000215915	cg08757091	rs6704200	0.858122	chr1	ATAD3C	protein_coding
ENSG00000142632	cg17236143	rs10927747	0.858168	chr1	ARHGEF19	protein_coding
ENSG00000126091	cg03822565	rs114361356	0.858169	chr1	ST3GAL3	protein_coding
ENSG00000143194	cg03050684	rs6675153	0.858189	chr1	MAEL	protein_coding
ENSG00000117242	cg08233218	rs12135822	0.858266	chr1	PINK1-AS	antisense
ENSG00000160072	cg10240778	rs1153102	0.858327	chr1	ATAD3B	protein_coding
ENSG00000160072	cg15875062	rs1153102	0.858327	chr1	ATAD3B	protein_coding
ENSG00000158109	cg23631759	rs13328662	0.858396	chr1	TPRG1L	protein_coding
ENSG00000162585	cg15798497	rs56051051	0.858441	chr1	FAAP20	protein_coding
ENSG00000143768	cg06418002	rs77445396	0.858514	chr1	LEFTY2	protein_coding
ENSG00000107404	cg14380230	rs4648829	0.858523	chr1	DVL1	protein_coding
ENSG00000162909	cg11145399	rs12563291	0.858719	chr1	CAPN2	protein_coding
ENSG00000116138	cg08815479	rs41270281	0.858784	chr1	DNAJC16	protein_coding
ENSG00000160097	cg00873050	rs12070847	0.858834	chr1	FNDC5	protein_coding
ENSG00000237975	cg15397087	rs140771909	0.858933	chr1	FLG-AS1	antisense
ENSG00000177868	cg11731606	rs200240184	0.858942	chr1	SVBP	protein_coding
ENSG00000118292	cg16431914	rs35413284	0.858976	chr1	C1orf54	protein_coding
ENSG00000143811	cg06939851	rs77157663	0.859062	chr1	PYCR2	protein_coding
ENSG00000203663	cg20433858	rs6701018	0.85917	chr1	OR2L2	protein_coding
ENSG00000116514	cg09510416	rs12075604	0.859224	chr1	RNF19B	protein_coding
ENSG00000203663	cg03748376	rs6701018	0.859379	chr1	OR2L2	protein_coding
ENSG00000049239	cg07173218	rs9435144	0.859424	chr1	H6PD	protein_coding
ENSG00000203663	cg20389361	rs6701018	0.859445	chr1	OR2L2	protein_coding
ENSG00000273487	cg21166360	rs139786195	0.859486	chr1	RP4-621B10.8	lincRNA
ENSG00000162585	cg08510499	rs2503705	0.85951	chr1	FAAP20	protein_coding
ENSG00000143387	cg10416503	rs4970976	0.859627	chr1	CTSK	protein_coding
ENSG00000117242	cg22506534	rs4021228	0.859714	chr1	PINK1-AS	antisense
ENSG00000160097	cg03125875	rs4951774	0.859901	chr1	FNDC5	protein_coding
ENSG00000157881	cg23713146	rs70956305	0.859984	chr1	PANK4	protein_coding
ENSG00000143811	cg15633273	rs10737420	0.860139	chr1	PYCR2	protein_coding
ENSG00000223745	cg00325112	rs6685271	0.860235	chr1	CCDC18-AS1	processed_transcript
ENSG00000116514	cg20340029	rs194642	0.860415	chr1	RNF19B	protein_coding
ENSG00000116514	cg26266099	rs194671	0.860449	chr1	RNF19B	protein_coding
ENSG00000142632	cg03969515	rs221063	0.8606	chr1	ARHGEF19	protein_coding
ENSG00000066135	cg11224575	rs17381720	0.86062	chr1	KDM4A	protein_coding
ENSG00000116157	cg06612871	rs6588431	0.860732	chr1	GPX7	protein_coding
ENSG00000272420	cg15151929	rs10910055	0.860807	chr1	RP4-740C4.7	sense_intronic
ENSG00000164011	cg00946598	rs114178023	0.860817	chr1	ZNF691	protein_coding
ENSG00000125945	cg22040403	rs11249063	0.861057	chr1	ZNF436	protein_coding
ENSG00000196071	cg00785941	rs6701018	0.861079	chr1	OR2L13	protein_coding
ENSG00000163050	cg01557798	rs140622693	0.861096	chr1	ADCK3	protein_coding
ENSG00000080947	cg22050733	rs7545418	0.861234	chr1	CROCCP3	transcribed_unprocessed_pseudogene
ENSG00000198691	cg05390563	rs4612636	0.861256	chr1	ABCA4	protein_coding
ENSG00000215908	cg23269169	rs12745538	0.861309	chr1	CROCCP2	transcribed_unprocessed_pseudogene
ENSG00000272455	cg27312944	rs11587831	0.861317	chr1	RP4-758J18.13	lincRNA
ENSG00000227533	cg00568910	rs17387775	0.861424	chr1	SLC2A1-AS1	lincRNA
ENSG00000159208	cg17353890	rs11204662	0.861595	chr1	CIART	protein_coding
ENSG00000203663	cg09598075	rs35231679	0.861681	chr1	OR2L2	protein_coding
ENSG00000162585	cg00656881	rs2503705	0.861734	chr1	FAAP20	protein_coding
ENSG00000196071	cg08944170	rs6701018	0.86186	chr1	OR2L13	protein_coding
ENSG00000116857	cg03981535	rs56327794	0.861918	chr1	TMEM9	protein_coding
ENSG00000163050	cg04193160	rs140622693	0.862035	chr1	ADCK3	protein_coding
ENSG00000131238	cg22128527	rs149215296	0.862266	chr1	PPT1	protein_coding
ENSG00000143740	cg20274441	rs2793461	0.862285	chr1	SNAP47	protein_coding
ENSG00000162433	cg21942430	rs2889130	0.86231	chr1	AK4	protein_coding
ENSG00000187147	cg14220329	rs77468496	0.862322	chr1	RNF220	protein_coding
ENSG00000171603	cg02425407	rs12725898	0.862398	chr1	CLSTN1	protein_coding
ENSG00000237975	cg23107878	rs12130219	0.862417	chr1	FLG-AS1	antisense
ENSG00000280114	cg12616097	rs1977269	0.862461	chr1	RP5-875O13.7	unprocessed_pseudogene
ENSG00000143420	cg03851496	rs149152727	0.862499	chr1	ENSA	protein_coding
ENSG00000143157	cg02063079	rs7548191	0.862525	chr1	POGK	protein_coding
ENSG00000142937	cg07343611	rs56071727	0.862689	chr1	RPS8	protein_coding
ENSG00000249087	cg04989128	rs6424144	0.863079	chr1	ZNF436-AS1	antisense
ENSG00000280114	cg09750171	rs117955269	0.863298	chr1	RP5-875O13.7	unprocessed_pseudogene
ENSG00000177868	cg00290994	rs78411500	0.863302	chr1	SVBP	protein_coding
ENSG00000143437	cg10416503	rs12568757	0.863332	chr1	ARNT	protein_coding
ENSG00000235098	cg13865934	rs34817085	0.863617	chr1	ANKRD65	protein_coding
ENSG00000180098	cg14724283	rs183647845	0.863658	chr1	TRNAU1AP	protein_coding
ENSG00000169231	cg01972745	rs7517412	0.863796	chr1	THBS3	protein_coding
ENSG00000196071	cg10580513	rs6701018	0.863877	chr1	OR2L13	protein_coding
ENSG00000237975	cg13498757	rs34428306	0.863915	chr1	FLG-AS1	antisense
ENSG00000233482	cg07732145	rs1146514	0.863967	chr1	RP11-78O9.1	antisense
ENSG00000196071	cg08868915	rs6701018	0.864018	chr1	OR2L13	protein_coding
ENSG00000162585	cg03732007	rs262663	0.864045	chr1	FAAP20	protein_coding
ENSG00000133069	cg10768996	rs1172113	0.864102	chr1	TMCC2	protein_coding
ENSG00000058668	cg11968713	rs4262605	0.864468	chr1	ATP2B4	protein_coding
ENSG00000237975	cg09127314	rs140771909	0.864515	chr1	FLG-AS1	antisense
ENSG00000176022	cg27059105	rs6603782	0.864552	chr1	B3GALT6	protein_coding
ENSG00000196071	cg20389361	rs6701018	0.864613	chr1	OR2L13	protein_coding
ENSG00000237975	cg13498757	rs140771909	0.864807	chr1	FLG-AS1	antisense
ENSG00000237975	cg15025200	rs140771909	0.864841	chr1	FLG-AS1	antisense
ENSG00000237975	cg21280320	rs140771909	0.864844	chr1	FLG-AS1	antisense
ENSG00000237975	cg23107878	rs140771909	0.864953	chr1	FLG-AS1	antisense
ENSG00000237975	cg02754945	rs140771909	0.864971	chr1	FLG-AS1	antisense
ENSG00000237975	cg26320663	rs140771909	0.865016	chr1	FLG-AS1	antisense
ENSG00000184313	cg19249107	rs146042564	0.865061	chr1	MROH7	protein_coding
ENSG00000162377	cg10482750	rs860671	0.865123	chr1	COA7	protein_coding
ENSG00000203865	cg27157434	rs75590072	0.865184	chr1	ATP1A1-AS1	processed_transcript
ENSG00000162378	cg10959408	rs72670837	0.865239	chr1	ZYG11B	protein_coding
ENSG00000213190	cg24210818	rs72710142	0.865349	chr1	MLLT11	protein_coding
ENSG00000197568	cg19342782	rs12732737	0.865372	chr1	HHLA3	protein_coding
ENSG00000127054	cg15706223	rs2765020	0.865445	chr1	CPSF3L	protein_coding
ENSG00000159208	cg03851496	rs4971010	0.865455	chr1	CIART	protein_coding
ENSG00000196071	cg20433858	rs6701018	0.865492	chr1	OR2L13	protein_coding
ENSG00000117505	cg05157376	rs150029429	0.865601	chr1	DR1	protein_coding
ENSG00000198842	cg23659062	rs10918634	0.865607	chr1	DUSP27	protein_coding
ENSG00000188643	cg04755954	rs79204205	0.865668	chr1	S100A16	protein_coding
ENSG00000162461	cg03420647	rs11577746	0.865681	chr1	SLC25A34	protein_coding
ENSG00000236200	cg11958827	rs114347687	0.865684	chr1	KDM4A-AS1	antisense
ENSG00000280114	cg25602718	rs10907231	0.865719	chr1	RP5-875O13.7	unprocessed_pseudogene
ENSG00000219481	cg12616097	rs1977269	0.865738	chr1	NBPF1	protein_coding
ENSG00000196071	cg03748376	rs6701018	0.865793	chr1	OR2L13	protein_coding
ENSG00000037637	cg02987928	rs35225769	0.865823	chr1	FBXO42	protein_coding
ENSG00000162461	cg22956858	rs1108185	0.86588	chr1	SLC25A34	protein_coding
ENSG00000162461	cg10483611	rs1108185	0.865884	chr1	SLC25A34	protein_coding
ENSG00000188672	cg04907595	rs11249204	0.865922	chr1	RHCE	protein_coding
ENSG00000037637	cg14429204	rs11260710	0.866098	chr1	FBXO42	protein_coding
ENSG00000142949	cg03511605	rs11210863	0.866151	chr1	PTPRF	protein_coding
ENSG00000186715	cg12616097	rs1977269	0.866162	chr1	MST1L	transcribed_unprocessed_pseudogene
ENSG00000223745	cg05157376	rs150029429	0.866172	chr1	CCDC18-AS1	processed_transcript
ENSG00000049239	cg15325734	rs12057259	0.866175	chr1	H6PD	protein_coding
ENSG00000189266	cg10150518	rs115515935	0.866257	chr1	PNRC2	protein_coding
ENSG00000280114	cg03735492	rs7526779	0.866518	chr1	RP5-875O13.7	unprocessed_pseudogene
ENSG00000143162	cg19948045	rs10918628	0.866519	chr1	CREG1	protein_coding
ENSG00000272455	cg12642568	rs908743	0.866582	chr1	RP4-758J18.13	lincRNA
ENSG00000182827	cg12214012	rs80058969	0.866739	chr1	ACBD3	protein_coding
ENSG00000158109	cg09891226	rs13328662	0.866787	chr1	TPRG1L	protein_coding
ENSG00000143772	cg20274441	rs1071530	0.866843	chr1	ITPKB	protein_coding
ENSG00000171603	cg26899284	rs60044002	0.86687	chr1	CLSTN1	protein_coding
ENSG00000196187	cg06418002	rs78142369	0.866874	chr1	TMEM63A	protein_coding
ENSG00000117408	cg12619880	rs114347687	0.86688	chr1	IPO13	protein_coding
ENSG00000116514	cg00843917	rs194642	0.866992	chr1	RNF19B	protein_coding
ENSG00000237975	cg12650227	rs4845424	0.867022	chr1	FLG-AS1	antisense
ENSG00000168159	cg07701678	rs10916451	0.867055	chr1	RNF187	protein_coding
ENSG00000188672	cg00349061	rs34626290	0.867057	chr1	RHCE	protein_coding
ENSG00000272420	cg17843887	rs12069588	0.867081	chr1	RP4-740C4.7	sense_intronic
ENSG00000037637	cg03522107	rs35225769	0.867153	chr1	FBXO42	protein_coding
ENSG00000266472	cg08667682	rs7519691	0.867206	chr1	MRPS21	protein_coding
ENSG00000159479	cg24509649	rs12407785	0.867256	chr1	MED8	protein_coding
ENSG00000162433	cg25290445	rs7534177	0.867341	chr1	AK4	protein_coding
ENSG00000188643	cg21988207	rs79204205	0.867364	chr1	S100A16	protein_coding
ENSG00000143771	cg17210999	rs11588322	0.867389	chr1	CNIH4	protein_coding
ENSG00000117408	cg18880737	rs114361356	0.867496	chr1	IPO13	protein_coding
ENSG00000143318	cg08912361	rs1316275	0.867539	chr1	CASQ1	protein_coding
ENSG00000143772	cg12136950	rs697847	0.867629	chr1	ITPKB	protein_coding
ENSG00000121904	cg16484018	rs4653352	0.867963	chr1	CSMD2	protein_coding
ENSG00000037637	cg20611680	rs41269189	0.867982	chr1	FBXO42	protein_coding
ENSG00000121903	cg12919773	rs903217	0.868012	chr1	ZSCAN20	protein_coding
ENSG00000160072	cg15868629	rs1153102	0.868068	chr1	ATAD3B	protein_coding
ENSG00000226029	cg26946938	rs1877623	0.868227	chr1	RP4-798A10.2	lincRNA
ENSG00000088280	cg24699146	rs2742973	0.868267	chr1	ASAP3	protein_coding
ENSG00000122483	cg07586725	rs114418355	0.868315	chr1	CCDC18	protein_coding
ENSG00000280114	cg05055766	rs2235932	0.868368	chr1	RP5-875O13.7	unprocessed_pseudogene
ENSG00000143776	cg25983849	rs10916036	0.868468	chr1	CDC42BPA	protein_coding
ENSG00000236200	cg05180596	rs114347687	0.868661	chr1	KDM4A-AS1	antisense
ENSG00000272455	cg00060374	rs12089560	0.868673	chr1	RP4-758J18.13	lincRNA
ENSG00000160072	cg12723840	rs9329412	0.868675	chr1	ATAD3B	protein_coding
ENSG00000143194	cg21693676	rs56310651	0.868727	chr1	MAEL	protein_coding
ENSG00000117408	cg06248699	rs618369	0.868733	chr1	IPO13	protein_coding
ENSG00000143457	cg21679169	rs607518	0.868756	chr1	GOLPH3L	protein_coding
ENSG00000164008	cg01782487	rs61775637	0.868834	chr1	C1orf50	protein_coding
ENSG00000187147	cg02939577	rs112096253	0.869486	chr1	RNF220	protein_coding
ENSG00000142949	cg12276329	rs201549563	0.869669	chr1	PTPRF	protein_coding
ENSG00000272455	cg10156298	rs1695855	0.869733	chr1	RP4-758J18.13	lincRNA
ENSG00000158864	cg26015133	rs35630547	0.869777	chr1	NDUFS2	protein_coding
ENSG00000196187	cg06418002	rs78142369	0.869862	chr1	TMEM63A	protein_coding
ENSG00000249087	cg22358066	rs6424144	0.869892	chr1	ZNF436-AS1	antisense
ENSG00000180098	cg13182756	rs113156082	0.870006	chr1	TRNAU1AP	protein_coding
ENSG00000175756	cg13027345	rs56378990	0.870074	chr1	AURKAIP1	protein_coding
ENSG00000249087	cg26856289	rs6424144	0.870116	chr1	ZNF436-AS1	antisense
ENSG00000143753	cg19318393	rs140957523	0.870137	chr1	DEGS1	protein_coding
ENSG00000117528	cg09160344	rs72727492	0.870163	chr1	ABCD3	protein_coding
ENSG00000268869	cg04558298	rs10907231	0.870561	chr1	ESPNP	transcribed_unprocessed_pseudogene
ENSG00000160072	cg10240778	rs9329412	0.870606	chr1	ATAD3B	protein_coding
ENSG00000159208	cg06902698	rs61819214	0.870794	chr1	CIART	protein_coding
ENSG00000049239	cg11521888	rs9435144	0.871158	chr1	H6PD	protein_coding
ENSG00000207005	cg19470726	rs113847540	0.871179	chr1	RNU1-2	snRNA
ENSG00000121903	cg14806693	rs7531293	0.871225	chr1	ZSCAN20	protein_coding
ENSG00000272455	cg22827694	rs34817085	0.871285	chr1	RP4-758J18.13	lincRNA
ENSG00000162873	cg09662818	rs7533637	0.871407	chr1	KLHDC8A	protein_coding
ENSG00000238142	cg20065512	rs11585710	0.871525	chr1	RP11-108M9.4	lincRNA
ENSG00000206652	cg25851313	rs113847540	0.871729	chr1	RNU1-1	snRNA
ENSG00000261168	cg24153003	rs1879533	0.87186	chr1	RP11-68I18.10	sense_overlapping
ENSG00000160712	cg25525754	rs12043556	0.871915	chr1	IL6R	protein_coding
ENSG00000176022	cg03521652	rs6603782	0.871971	chr1	B3GALT6	protein_coding
ENSG00000085840	cg10137383	rs71654987	0.872063	chr1	ORC1	protein_coding
ENSG00000188643	cg13697387	rs79204205	0.872117	chr1	S100A16	protein_coding
ENSG00000178922	cg02145259	rs56349810	0.872134	chr1	HYI	protein_coding
ENSG00000229444	cg06322035	rs37469	0.872141	chr1	RP11-184I16.4	antisense
ENSG00000162461	cg26664206	rs77811513	0.872187	chr1	SLC25A34	protein_coding
ENSG00000049239	cg25284492	rs9435144	0.872189	chr1	H6PD	protein_coding
ENSG00000272420	cg26568075	rs4648832	0.872343	chr1	RP4-740C4.7	sense_intronic
ENSG00000242485	cg20747739	rs2275915	0.872392	chr1	MRPL20	protein_coding
ENSG00000186715	cg27071325	rs3850722	0.872441	chr1	MST1L	transcribed_unprocessed_pseudogene
ENSG00000182118	cg02530879	rs1321132	0.872556	chr1	FAM89A	protein_coding
ENSG00000219481	cg20065512	rs11585710	0.872619	chr1	NBPF1	protein_coding
ENSG00000280114	cg03180011	rs12404333	0.872747	chr1	RP5-875O13.7	unprocessed_pseudogene
ENSG00000171621	cg19092837	rs12135219	0.872859	chr1	SPSB1	protein_coding
ENSG00000242485	cg15706223	rs2765020	0.873218	chr1	MRPL20	protein_coding
ENSG00000066135	cg27033754	rs150936757	0.873481	chr1	KDM4A	protein_coding
ENSG00000118194	cg06750292	rs2360545	0.873512	chr1	TNNT2	protein_coding
ENSG00000235098	cg17507949	rs3766165	0.873521	chr1	ANKRD65	protein_coding
ENSG00000198216	cg22856976	rs2609473	0.873708	chr1	CACNA1E	protein_coding
ENSG00000160072	cg00653281	rs1153102	0.87382	chr1	ATAD3B	protein_coding
ENSG00000116329	cg02251754	rs12089573	0.873869	chr1	OPRD1	protein_coding
ENSG00000066322	cg12656391	rs839752	0.87401	chr1	ELOVL1	protein_coding
ENSG00000162873	cg01243924	rs61313780	0.874055	chr1	KLHDC8A	protein_coding
ENSG00000158882	cg07385423	rs6664288	0.874117	chr1	TOMM40L	protein_coding
ENSG00000157191	cg12548558	rs6603888	0.874165	chr1	NECAP2	protein_coding
ENSG00000221986	cg01995520	rs11591056	0.874247	chr1	MYBPHL	protein_coding
ENSG00000272455	cg00040588	rs146584313	0.874411	chr1	RP4-758J18.13	lincRNA
ENSG00000176022	cg00211609	rs190796582	0.874439	chr1	B3GALT6	protein_coding
ENSG00000131236	cg03130816	rs260970	0.874629	chr1	CAP1	protein_coding
ENSG00000049239	cg09122657	rs9435144	0.874629	chr1	H6PD	protein_coding
ENSG00000116544	cg02703525	rs10908306	0.874766	chr1	DLGAP3	protein_coding
ENSG00000131591	cg24475622	rs12731385	0.874814	chr1	C1orf159	protein_coding
ENSG00000229444	cg06207804	rs37469	0.8749	chr1	RP11-184I16.4	antisense
ENSG00000219481	cg09507771	rs2985125	0.87493	chr1	NBPF1	protein_coding
ENSG00000142937	cg04122461	rs1637284	0.875078	chr1	RPS8	protein_coding
ENSG00000117500	cg23933261	rs9659100	0.875136	chr1	TMED5	protein_coding
ENSG00000143434	cg17865371	rs116398299	0.87519	chr1	SEMA6C	protein_coding
ENSG00000197747	cg24914149	rs41267636	0.875493	chr1	S100A10	protein_coding
ENSG00000116329	cg11975685	rs12089573	0.875591	chr1	OPRD1	protein_coding
ENSG00000049239	cg23913482	rs6577563	0.875596	chr1	H6PD	protein_coding
ENSG00000171621	cg21546874	rs139022564	0.875635	chr1	SPSB1	protein_coding
ENSG00000176022	cg00657094	rs190796582	0.875666	chr1	B3GALT6	protein_coding
ENSG00000135828	cg00308770	rs72727017	0.875954	chr1	RNASEL	protein_coding
ENSG00000188643	cg21347427	rs79204205	0.876057	chr1	S100A16	protein_coding
ENSG00000204138	cg10746943	rs6700020	0.876088	chr1	PHACTR4	protein_coding
ENSG00000215915	cg23441090	rs2843158	0.876095	chr1	ATAD3C	protein_coding
ENSG00000186301	cg12442246	rs2165678	0.87612	chr1	MST1P2	unprocessed_pseudogene
ENSG00000116514	cg03177171	rs8040	0.876134	chr1	RNF19B	protein_coding
ENSG00000118194	cg00328217	rs2360545	0.876143	chr1	TNNT2	protein_coding
ENSG00000163050	cg13980580	rs1800674	0.87628	chr1	ADCK3	protein_coding
ENSG00000215883	cg23261103	rs4575030	0.8763	chr1	CYB5RL	protein_coding
ENSG00000160097	cg14144977	rs4652890	0.876494	chr1	FNDC5	protein_coding
ENSG00000203663	cg23028721	rs6701018	0.876495	chr1	OR2L2	protein_coding
ENSG00000135750	cg02838825	rs4333882	0.876546	chr1	KCNK1	protein_coding
ENSG00000158109	cg09269935	rs2244942	0.876578	chr1	TPRG1L	protein_coding
ENSG00000116678	cg11746396	rs59255837	0.876703	chr1	LEPR	protein_coding
ENSG00000177868	cg22397365	rs6692564	0.876741	chr1	SVBP	protein_coding
ENSG00000158793	cg10711303	rs4656983	0.876778	chr1	NIT1	protein_coding
ENSG00000196071	cg23028721	rs6701018	0.87678	chr1	OR2L13	protein_coding
ENSG00000058453	cg01648953	rs12756041	0.876799	chr1	CROCC	protein_coding
ENSG00000160097	cg04503267	rs12070847	0.876829	chr1	FNDC5	protein_coding
ENSG00000158769	cg05392764	rs112334085	0.876846	chr1	F11R	protein_coding
ENSG00000143420	cg25066665	rs149152727	0.876862	chr1	ENSA	protein_coding
ENSG00000162378	cg24141115	rs79568889	0.876868	chr1	ZYG11B	protein_coding
ENSG00000131591	cg27399052	rs12731385	0.876978	chr1	C1orf159	protein_coding
ENSG00000160058	cg05570827	rs115307537	0.876993	chr1	BSDC1	protein_coding
ENSG00000272420	cg12866100	rs10910055	0.877004	chr1	RP4-740C4.7	sense_intronic
ENSG00000160712	cg21714592	rs12043556	0.877172	chr1	IL6R	protein_coding
ENSG00000266472	cg14008937	rs76413654	0.87732	chr1	MRPS21	protein_coding
ENSG00000176022	cg24034746	rs78107697	0.877421	chr1	B3GALT6	protein_coding
ENSG00000001460	cg22502492	rs11591176	0.877478	chr1	STPG1	protein_coding
ENSG00000117408	cg11837102	rs114361356	0.87753	chr1	IPO13	protein_coding
ENSG00000184908	cg12648811	rs848213	0.877853	chr1	CLCNKB	protein_coding
ENSG00000176022	cg12345380	rs112603604	0.877953	chr1	B3GALT6	protein_coding
ENSG00000142632	cg06365898	rs34693808	0.878065	chr1	ARHGEF19	protein_coding
ENSG00000163393	cg04245104	rs12726299	0.878098	chr1	SLC22A15	protein_coding
ENSG00000215915	cg00567930	rs2840535	0.878106	chr1	ATAD3C	protein_coding
ENSG00000215908	cg25602718	rs12745538	0.878117	chr1	CROCCP2	transcribed_unprocessed_pseudogene
ENSG00000188643	cg08732526	rs79204205	0.878175	chr1	S100A16	protein_coding
ENSG00000143318	cg24329783	rs76240791	0.878247	chr1	CASQ1	protein_coding
ENSG00000142949	cg02959555	rs11210863	0.878356	chr1	PTPRF	protein_coding
ENSG00000122218	cg20012024	rs111847432	0.878471	chr1	COPA	protein_coding
ENSG00000176022	cg09331144	rs112603604	0.878623	chr1	B3GALT6	protein_coding
ENSG00000273487	cg02468108	rs11423955	0.878716	chr1	RP4-621B10.8	lincRNA
ENSG00000176022	cg20411340	rs112603604	0.878742	chr1	B3GALT6	protein_coding
ENSG00000066135	cg12619880	rs114347687	0.878755	chr1	KDM4A	protein_coding
ENSG00000188643	cg00204728	rs79204205	0.878875	chr1	S100A16	protein_coding
ENSG00000186301	cg25602718	rs7537985	0.878913	chr1	MST1P2	unprocessed_pseudogene
ENSG00000186715	cg07240000	rs3850722	0.878929	chr1	MST1L	transcribed_unprocessed_pseudogene
ENSG00000152078	cg00666014	rs2766003	0.878969	chr1	TMEM56	protein_coding
ENSG00000236200	cg23930257	rs114347687	0.879003	chr1	KDM4A-AS1	antisense
ENSG00000117408	cg23848055	rs114361356	0.879079	chr1	IPO13	protein_coding
ENSG00000188643	cg23027387	rs79204205	0.879119	chr1	S100A16	protein_coding
ENSG00000272455	cg15633699	rs4970372	0.87923	chr1	RP4-758J18.13	lincRNA
ENSG00000236200	cg12619880	rs114347687	0.879238	chr1	KDM4A-AS1	antisense
ENSG00000085832	cg07364646	rs61782074	0.879302	chr1	EPS15	protein_coding
ENSG00000117408	cg11958827	rs114361356	0.879333	chr1	IPO13	protein_coding
ENSG00000117408	cg16047291	rs114361356	0.879351	chr1	IPO13	protein_coding
ENSG00000158882	cg24437523	rs678456	0.879373	chr1	TOMM40L	protein_coding
ENSG00000272491	cg03438665	rs4927002	0.879399	chr1	RP5-1024N4.4	antisense
ENSG00000143387	cg26549034	rs138174426	0.879414	chr1	CTSK	protein_coding
ENSG00000188643	cg16354520	rs79204205	0.879437	chr1	S100A16	protein_coding
ENSG00000117408	cg23930257	rs114361356	0.879502	chr1	IPO13	protein_coding
ENSG00000066135	cg18880737	rs114347687	0.879571	chr1	KDM4A	protein_coding
ENSG00000236200	cg25041176	rs114347687	0.879582	chr1	KDM4A-AS1	antisense
ENSG00000226029	cg04763852	rs2610597	0.879614	chr1	RP4-798A10.2	lincRNA
ENSG00000189339	cg11649182	rs9442430	0.879679	chr1	SLC35E2B	protein_coding
ENSG00000236200	cg23848055	rs114347687	0.879682	chr1	KDM4A-AS1	antisense
ENSG00000268869	cg19809791	rs1977269	0.879688	chr1	ESPNP	transcribed_unprocessed_pseudogene
ENSG00000117408	cg25041176	rs114361356	0.879713	chr1	IPO13	protein_coding
ENSG00000117408	cg08959526	rs114361356	0.879769	chr1	IPO13	protein_coding
ENSG00000117408	cg05180596	rs114361356	0.879928	chr1	IPO13	protein_coding
ENSG00000143753	cg11060701	rs12133599	0.880108	chr1	DEGS1	protein_coding
ENSG00000143252	cg17450446	rs111257998	0.880248	chr1	SDHC	protein_coding
ENSG00000235098	cg00040588	rs3766165	0.88027	chr1	ANKRD65	protein_coding
ENSG00000269896	cg02237208	rs2843142	0.880288	chr1	RP4-740C4.5	transcribed_processed_pseudogene
ENSG00000143434	cg00984468	rs12742185	0.880302	chr1	SEMA6C	protein_coding
ENSG00000171603	cg04254468	rs72855780	0.880343	chr1	CLSTN1	protein_coding
ENSG00000122218	cg12426196	rs111847432	0.880442	chr1	COPA	protein_coding
ENSG00000066135	cg23930257	rs114361356	0.880446	chr1	KDM4A	protein_coding
ENSG00000188643	cg21543102	rs11578822	0.880462	chr1	S100A16	protein_coding
ENSG00000066135	cg25041176	rs114361356	0.88054	chr1	KDM4A	protein_coding
ENSG00000160072	cg03742705	rs9329412	0.880632	chr1	ATAD3B	protein_coding
ENSG00000236200	cg18880737	rs114347687	0.880647	chr1	KDM4A-AS1	antisense
ENSG00000126091	cg18880737	rs114361356	0.880901	chr1	ST3GAL3	protein_coding
ENSG00000126091	cg23930257	rs114361356	0.88098	chr1	ST3GAL3	protein_coding
ENSG00000126091	cg25041176	rs114361356	0.88099	chr1	ST3GAL3	protein_coding
ENSG00000116299	cg11885396	rs41281344	0.881001	chr1	KIAA1324	protein_coding
ENSG00000116678	cg03607891	rs9436746	0.881038	chr1	LEPR	protein_coding
ENSG00000126091	cg05180596	rs114361356	0.881051	chr1	ST3GAL3	protein_coding
ENSG00000126091	cg11958827	rs114361356	0.881073	chr1	ST3GAL3	protein_coding
ENSG00000126091	cg16047291	rs114361356	0.88108	chr1	ST3GAL3	protein_coding
ENSG00000126091	cg23848055	rs114361356	0.881113	chr1	ST3GAL3	protein_coding
ENSG00000220785	cg13065299	rs35622844	0.881124	chr1	MTMR9LP	transcribed_unprocessed_pseudogene
ENSG00000126091	cg08959526	rs114361356	0.881147	chr1	ST3GAL3	protein_coding
ENSG00000131591	cg08663263	rs12731385	0.881163	chr1	C1orf159	protein_coding
ENSG00000143437	cg15164641	rs12568757	0.881195	chr1	ARNT	protein_coding
ENSG00000204219	cg06902109	rs4655108	0.881198	chr1	TCEA3	protein_coding
ENSG00000178922	cg11731606	rs56349810	0.881214	chr1	HYI	protein_coding
ENSG00000163131	cg15164641	rs6587520	0.881232	chr1	CTSS	protein_coding
ENSG00000131591	cg10156298	rs12731385	0.881265	chr1	C1orf159	protein_coding
ENSG00000229444	cg23930257	rs114361356	0.881292	chr1	RP11-184I16.4	antisense
ENSG00000229444	cg25041176	rs114361356	0.881304	chr1	RP11-184I16.4	antisense
ENSG00000229444	cg18880737	rs114361356	0.88132	chr1	RP11-184I16.4	antisense
ENSG00000066135	cg05180596	rs114361356	0.881359	chr1	KDM4A	protein_coding
ENSG00000235098	cg22827694	rs3766165	0.881383	chr1	ANKRD65	protein_coding
ENSG00000143387	cg09365446	rs56303945	0.881433	chr1	CTSK	protein_coding
ENSG00000188643	cg24332770	rs79204205	0.881457	chr1	S100A16	protein_coding
ENSG00000213625	cg26299980	rs12145690	0.881483	chr1	LEPROT	protein_coding
ENSG00000179743	cg04861793	rs2985126	0.88157	chr1	FLJ37453	antisense
ENSG00000126091	cg11837102	rs114361356	0.88157	chr1	ST3GAL3	protein_coding
ENSG00000066135	cg23848055	rs114361356	0.881716	chr1	KDM4A	protein_coding
ENSG00000229444	cg11837102	rs37469	0.881743	chr1	RP11-184I16.4	antisense
ENSG00000066135	cg08959526	rs114361356	0.881747	chr1	KDM4A	protein_coding
ENSG00000125945	cg12473606	rs55993452	0.881802	chr1	ZNF436	protein_coding
ENSG00000116678	cg21119717	rs12403808	0.881897	chr1	LEPR	protein_coding
ENSG00000229444	cg05180596	rs114361356	0.881928	chr1	RP11-184I16.4	antisense
ENSG00000229444	cg17536413	rs1637284	0.882042	chr1	RP11-184I16.4	antisense
ENSG00000066135	cg11958827	rs114361356	0.882049	chr1	KDM4A	protein_coding
ENSG00000066135	cg16047291	rs114361356	0.88206	chr1	KDM4A	protein_coding
ENSG00000066135	cg11837102	rs114361356	0.882184	chr1	KDM4A	protein_coding
ENSG00000160072	cg09172260	rs9329412	0.882196	chr1	ATAD3B	protein_coding
ENSG00000272420	cg03324138	rs10910055	0.882281	chr1	RP4-740C4.7	sense_intronic
ENSG00000229444	cg08959526	rs114361356	0.882282	chr1	RP11-184I16.4	antisense
ENSG00000229444	cg23848055	rs114361356	0.882402	chr1	RP11-184I16.4	antisense
ENSG00000122218	cg00945666	rs111847432	0.882478	chr1	COPA	protein_coding
ENSG00000189339	cg13323817	rs12566205	0.882502	chr1	SLC35E2B	protein_coding
ENSG00000178922	cg18394614	rs112473641	0.882564	chr1	HYI	protein_coding
ENSG00000229444	cg11958827	rs114361356	0.882597	chr1	RP11-184I16.4	antisense
ENSG00000229444	cg16047291	rs114361356	0.882603	chr1	RP11-184I16.4	antisense
ENSG00000238142	cg24306142	rs279024	0.882609	chr1	RP11-108M9.4	lincRNA
ENSG00000236200	cg17536413	rs1637284	0.882663	chr1	KDM4A-AS1	antisense
ENSG00000171603	cg16436377	rs72855780	0.882868	chr1	CLSTN1	protein_coding
ENSG00000143387	cg04414720	rs56303945	0.882942	chr1	CTSK	protein_coding
ENSG00000270171	cg05342510	rs72640073	0.882956	chr1	RP11-338N10.1	lincRNA
ENSG00000280114	cg03969515	rs2863845	0.882965	chr1	RP5-875O13.7	unprocessed_pseudogene
ENSG00000160072	cg15875062	rs9329412	0.882978	chr1	ATAD3B	protein_coding
ENSG00000229444	cg11837102	rs114361356	0.883107	chr1	RP11-184I16.4	antisense
ENSG00000215915	cg03442254	rs6704200	0.883186	chr1	ATAD3C	protein_coding
ENSG00000268869	cg07194829	rs1977269	0.883203	chr1	ESPNP	transcribed_unprocessed_pseudogene
ENSG00000131591	cg21779088	rs12731385	0.883249	chr1	C1orf159	protein_coding
ENSG00000164008	cg16655129	rs35938849	0.883275	chr1	C1orf50	protein_coding
ENSG00000143387	cg15164641	rs4970976	0.883315	chr1	CTSK	protein_coding
ENSG00000133059	cg23805457	rs138662683	0.883348	chr1	DSTYK	protein_coding
ENSG00000171603	cg11222217	rs72855780	0.883435	chr1	CLSTN1	protein_coding
ENSG00000238142	cg05055766	rs2311481	0.883471	chr1	RP11-108M9.4	lincRNA
ENSG00000213625	cg16413020	rs12145690	0.883596	chr1	LEPROT	protein_coding
ENSG00000169231	cg11734019	rs148911079	0.883756	chr1	THBS3	protein_coding
ENSG00000188643	cg22616525	rs79204205	0.883797	chr1	S100A16	protein_coding
ENSG00000215915	cg21779088	rs2710873	0.883882	chr1	ATAD3C	protein_coding
ENSG00000204219	cg27468586	rs4655108	0.884125	chr1	TCEA3	protein_coding
ENSG00000117305	cg16430505	rs138824565	0.884144	chr1	HMGCL	protein_coding
ENSG00000143740	cg24947555	rs708761	0.884163	chr1	SNAP47	protein_coding
ENSG00000188643	cg23380974	rs77338529	0.884249	chr1	S100A16	protein_coding
ENSG00000181873	cg21436055	rs11800309	0.884318	chr1	IBA57	protein_coding
ENSG00000219481	cg09004167	rs2143808	0.884648	chr1	NBPF1	protein_coding
ENSG00000066185	cg05724479	rs1537522	0.884679	chr1	ZMYND12	protein_coding
ENSG00000213625	cg14976592	rs12145690	0.884962	chr1	LEPROT	protein_coding
ENSG00000143256	cg19735514	rs116601080	0.884983	chr1	PFDN2	protein_coding
ENSG00000179743	cg12651933	rs1995302	0.885028	chr1	FLJ37453	antisense
ENSG00000261168	cg20778468	rs1879533	0.885201	chr1	RP11-68I18.10	sense_overlapping
ENSG00000238142	cg03735492	rs7531637	0.885456	chr1	RP11-108M9.4	lincRNA
ENSG00000116678	cg19057348	rs139569596	0.885477	chr1	LEPR	protein_coding
ENSG00000160072	cg09172260	rs4994703	0.885563	chr1	ATAD3B	protein_coding
ENSG00000235098	cg00060374	rs12089560	0.885622	chr1	ANKRD65	protein_coding
ENSG00000196187	cg22904066	rs78142369	0.885806	chr1	TMEM63A	protein_coding
ENSG00000131591	cg09363892	rs12731385	0.886182	chr1	C1orf159	protein_coding
ENSG00000135828	cg07212848	rs10558987	0.886222	chr1	RNASEL	protein_coding
ENSG00000186301	cg24791205	rs2005457	0.886249	chr1	MST1P2	unprocessed_pseudogene
ENSG00000117407	cg23028072	rs75406671	0.886711	chr1	ARTN	protein_coding
ENSG00000117407	cg16047291	rs75406671	0.886752	chr1	ARTN	protein_coding
ENSG00000117407	cg11958827	rs75406671	0.886752	chr1	ARTN	protein_coding
ENSG00000117407	cg13666471	rs75406671	0.886769	chr1	ARTN	protein_coding
ENSG00000163131	cg13178372	rs143185028	0.886793	chr1	CTSS	protein_coding
ENSG00000117425	cg21902252	rs145709231	0.886833	chr1	PTCH2	protein_coding
ENSG00000117407	cg23848055	rs75406671	0.886994	chr1	ARTN	protein_coding
ENSG00000117407	cg08959526	rs75406671	0.887145	chr1	ARTN	protein_coding
ENSG00000226029	cg00605147	rs1746722	0.887157	chr1	RP4-798A10.2	lincRNA
ENSG00000189171	cg10302420	rs72708737	0.887227	chr1	S100A13	protein_coding
ENSG00000117407	cg05180596	rs75406671	0.887406	chr1	ARTN	protein_coding
ENSG00000269896	cg12131894	rs2843142	0.887459	chr1	RP4-740C4.5	transcribed_processed_pseudogene
ENSG00000122218	cg11578532	rs111847432	0.887486	chr1	COPA	protein_coding
ENSG00000117407	cg18880737	rs75406671	0.887582	chr1	ARTN	protein_coding
ENSG00000117505	cg17858364	rs10782959	0.887633	chr1	DR1	protein_coding
ENSG00000122218	cg27180868	rs111847432	0.887711	chr1	COPA	protein_coding
ENSG00000117407	cg23930257	rs75406671	0.887984	chr1	ARTN	protein_coding
ENSG00000117407	cg25041176	rs75406671	0.887984	chr1	ARTN	protein_coding
ENSG00000268869	cg20848377	rs156916	0.888007	chr1	ESPNP	transcribed_unprocessed_pseudogene
ENSG00000215908	cg25602718	rs12745538	0.888041	chr1	CROCCP2	transcribed_unprocessed_pseudogene
ENSG00000227533	cg09824328	rs200895692	0.888048	chr1	SLC2A1-AS1	lincRNA
ENSG00000122218	cg11731300	rs111847432	0.888246	chr1	COPA	protein_coding
ENSG00000163545	cg20034980	rs1980051	0.888269	chr1	NUAK2	protein_coding
ENSG00000162873	cg00855731	rs61313780	0.88832	chr1	KLHDC8A	protein_coding
ENSG00000122218	cg24411043	rs111847432	0.88833	chr1	COPA	protein_coding
ENSG00000116329	cg26058965	rs204048	0.888411	chr1	OPRD1	protein_coding
ENSG00000189171	cg17572196	rs41267636	0.88844	chr1	S100A13	protein_coding
ENSG00000117408	cg27033754	rs150936757	0.888774	chr1	IPO13	protein_coding
ENSG00000133059	cg00855731	rs61313780	0.888788	chr1	DSTYK	protein_coding
ENSG00000066056	cg15935905	rs35938849	0.888792	chr1	TIE1	protein_coding
ENSG00000117410	cg22797514	rs869896	0.888897	chr1	ATP6V0B	protein_coding
ENSG00000248485	cg26162836	rs2501866	0.888905	chr1	PCP4L1	protein_coding
ENSG00000159479	cg22709362	rs12742974	0.888974	chr1	MED8	protein_coding
ENSG00000117407	cg12619880	rs75406671	0.88913	chr1	ARTN	protein_coding
ENSG00000117407	cg27033754	rs75406671	0.88913	chr1	ARTN	protein_coding
ENSG00000188643	cg26466858	rs79204205	0.889244	chr1	S100A16	protein_coding
ENSG00000162755	cg08279665	rs58876387	0.889345	chr1	KLHDC9	protein_coding
ENSG00000164010	cg08263040	rs323717	0.889523	chr1	ERMAP	protein_coding
ENSG00000235098	cg15633699	rs3766165	0.889779	chr1	ANKRD65	protein_coding
ENSG00000197747	cg23724738	rs41267636	0.889881	chr1	S100A10	protein_coding
ENSG00000184908	cg02394978	rs61772382	0.889892	chr1	CLCNKB	protein_coding
ENSG00000122218	cg18147168	rs111847432	0.889978	chr1	COPA	protein_coding
ENSG00000122218	cg13466383	rs111847432	0.890138	chr1	COPA	protein_coding
ENSG00000122218	cg13906823	rs111847432	0.890391	chr1	COPA	protein_coding
ENSG00000081248	cg20362147	rs114204297	0.89046	chr1	CACNA1S	protein_coding
ENSG00000229444	cg22797514	rs10789443	0.890576	chr1	RP11-184I16.4	antisense
ENSG00000122218	cg24161057	rs111847432	0.890616	chr1	COPA	protein_coding
ENSG00000001460	cg22040403	rs6655974	0.890697	chr1	STPG1	protein_coding
ENSG00000227533	cg00102166	rs17387775	0.890929	chr1	SLC2A1-AS1	lincRNA
ENSG00000116329	cg07913096	rs138045396	0.890961	chr1	OPRD1	protein_coding
ENSG00000173614	cg25013184	rs140532807	0.891093	chr1	NMNAT1	protein_coding
ENSG00000134744	cg06905679	rs200263495	0.891222	chr1	ZCCHC11	protein_coding
ENSG00000162585	cg26566407	rs7536087	0.891316	chr1	FAAP20	protein_coding
ENSG00000143194	cg01169725	rs56310651	0.891502	chr1	MAEL	protein_coding
ENSG00000134686	cg01555014	rs9970917	0.891605	chr1	PHC2	protein_coding
ENSG00000177868	cg21681327	rs139399468	0.891621	chr1	SVBP	protein_coding
ENSG00000226029	cg20065512	rs1877623	0.891678	chr1	RP4-798A10.2	lincRNA
ENSG00000248485	cg14978304	rs2501866	0.891692	chr1	PCP4L1	protein_coding
ENSG00000175756	cg21288685	rs56378990	0.891748	chr1	AURKAIP1	protein_coding
ENSG00000280114	cg19809791	rs1977269	0.89182	chr1	RP5-875O13.7	unprocessed_pseudogene
ENSG00000236200	cg24483304	rs61776944	0.891951	chr1	KDM4A-AS1	antisense
ENSG00000204219	cg00917251	rs501748	0.892048	chr1	TCEA3	protein_coding
ENSG00000235098	cg10156298	rs12731385	0.892062	chr1	ANKRD65	protein_coding
ENSG00000280114	cg02987928	rs2863845	0.892079	chr1	RP5-875O13.7	unprocessed_pseudogene
ENSG00000122218	cg00329300	rs111847432	0.892097	chr1	COPA	protein_coding
ENSG00000142937	cg00002837	rs1637284	0.892132	chr1	RPS8	protein_coding
ENSG00000160058	cg03177171	rs2273376	0.89258	chr1	BSDC1	protein_coding
ENSG00000160072	cg16347928	rs1153102	0.892661	chr1	ATAD3B	protein_coding
ENSG00000268869	cg05208572	rs1977269	0.892836	chr1	ESPNP	transcribed_unprocessed_pseudogene
ENSG00000235098	cg22827694	rs2765030	0.892936	chr1	ANKRD65	protein_coding
ENSG00000235098	cg15633699	rs2765030	0.892937	chr1	ANKRD65	protein_coding
ENSG00000272420	cg07821364	rs3795272	0.892975	chr1	RP4-740C4.7	sense_intronic
ENSG00000160072	cg08128007	rs1153102	0.892987	chr1	ATAD3B	protein_coding
ENSG00000235098	cg00060374	rs2765030	0.892993	chr1	ANKRD65	protein_coding
ENSG00000268869	cg12442246	rs1977269	0.893037	chr1	ESPNP	transcribed_unprocessed_pseudogene
ENSG00000121905	cg21578869	rs4653015	0.893055	chr1	HPCA	protein_coding
ENSG00000189171	cg02060465	rs41267636	0.893303	chr1	S100A13	protein_coding
ENSG00000215915	cg15151929	rs6704200	0.893378	chr1	ATAD3C	protein_coding
ENSG00000143398	cg26549034	rs138174426	0.893409	chr1	PIP5K1A	protein_coding
ENSG00000272455	cg15633699	rs2765030	0.893437	chr1	RP4-758J18.13	lincRNA
ENSG00000127054	cg04557908	rs4648631	0.893439	chr1	CPSF3L	protein_coding
ENSG00000272455	cg22827694	rs2765030	0.893441	chr1	RP4-758J18.13	lincRNA
ENSG00000158769	cg22608657	rs2490430	0.893448	chr1	F11R	protein_coding
ENSG00000272455	cg00060374	rs2765030	0.893453	chr1	RP4-758J18.13	lincRNA
ENSG00000227533	cg20282814	rs710217	0.893522	chr1	SLC2A1-AS1	lincRNA
ENSG00000219481	cg19809791	rs1977269	0.893596	chr1	NBPF1	protein_coding
ENSG00000268869	cg25602718	rs10907231	0.893838	chr1	ESPNP	transcribed_unprocessed_pseudogene
ENSG00000227533	cg12101479	rs17387775	0.893873	chr1	SLC2A1-AS1	lincRNA
ENSG00000238142	cg16466254	rs2311481	0.893919	chr1	RP11-108M9.4	lincRNA
ENSG00000273487	cg16833230	rs11423955	0.894024	chr1	RP4-621B10.8	lincRNA
ENSG00000178922	cg09988116	rs56349810	0.894178	chr1	HYI	protein_coding
ENSG00000143374	cg19693494	rs114941413	0.894182	chr1	TARS2	protein_coding
ENSG00000280114	cg20611680	rs2863845	0.894263	chr1	RP5-875O13.7	unprocessed_pseudogene
ENSG00000268869	cg12648811	rs1977269	0.894484	chr1	ESPNP	transcribed_unprocessed_pseudogene
ENSG00000143155	cg23826681	rs142392018	0.894506	chr1	TIPRL	protein_coding
ENSG00000142937	cg04307162	rs17404795	0.894598	chr1	RPS8	protein_coding
ENSG00000187815	cg04341486	rs736861	0.894678	chr1	ZFP69	protein_coding
ENSG00000266472	cg18529259	rs7512552	0.894685	chr1	MRPS21	protein_coding
ENSG00000268869	cg09004167	rs1977269	0.894776	chr1	ESPNP	transcribed_unprocessed_pseudogene
ENSG00000237975	cg15185033	rs61815149	0.8949	chr1	FLG-AS1	antisense
ENSG00000280114	cg12442246	rs1977269	0.894921	chr1	RP5-875O13.7	unprocessed_pseudogene
ENSG00000272455	cg10705488	rs908743	0.894924	chr1	RP4-758J18.13	lincRNA
ENSG00000186715	cg19809791	rs1977269	0.894998	chr1	MST1L	transcribed_unprocessed_pseudogene
ENSG00000116138	cg06365898	rs41270281	0.895048	chr1	DNAJC16	protein_coding
ENSG00000049245	cg16833163	rs149492309	0.895109	chr1	VAMP3	protein_coding
ENSG00000280114	cg07194829	rs1977269	0.895258	chr1	RP5-875O13.7	unprocessed_pseudogene
ENSG00000121903	cg00668227	rs2641957	0.895259	chr1	ZSCAN20	protein_coding
ENSG00000186715	cg07194829	rs1977269	0.895262	chr1	MST1L	transcribed_unprocessed_pseudogene
ENSG00000235098	cg27399052	rs12731385	0.895264	chr1	ANKRD65	protein_coding
ENSG00000225828	cg03177171	rs2273376	0.895379	chr1	FAM229A	protein_coding
ENSG00000227533	cg21615440	rs200895692	0.895386	chr1	SLC2A1-AS1	lincRNA
ENSG00000162585	cg00213113	rs7536087	0.89553	chr1	FAAP20	protein_coding
ENSG00000280114	cg05208572	rs1977269	0.895787	chr1	RP5-875O13.7	unprocessed_pseudogene
ENSG00000184588	cg14976592	rs11208769	0.895917	chr1	PDE4B	protein_coding
ENSG00000219481	cg12442246	rs1977269	0.896043	chr1	NBPF1	protein_coding
ENSG00000178922	cg20276103	rs56349810	0.896188	chr1	HYI	protein_coding
ENSG00000272455	cg22273474	rs2765030	0.896193	chr1	RP4-758J18.13	lincRNA
ENSG00000272455	cg17132079	rs2765030	0.896224	chr1	RP4-758J18.13	lincRNA
ENSG00000197747	cg02493487	rs41267636	0.896259	chr1	S100A10	protein_coding
ENSG00000272455	cg00970622	rs2765030	0.896298	chr1	RP4-758J18.13	lincRNA
ENSG00000227533	cg03128534	rs710217	0.89641	chr1	SLC2A1-AS1	lincRNA
ENSG00000235098	cg00970622	rs2765030	0.896466	chr1	ANKRD65	protein_coding
ENSG00000116514	cg06296959	rs587149	0.896482	chr1	RNF19B	protein_coding
ENSG00000207513	cg25851313	rs113847540	0.896483	chr1	RNU1-3	snRNA
ENSG00000235098	cg22273474	rs2765030	0.896499	chr1	ANKRD65	protein_coding
ENSG00000235098	cg17132079	rs2765030	0.896511	chr1	ANKRD65	protein_coding
ENSG00000237950	cg22797514	rs12030367	0.896601	chr1	RP11-7O11.3	antisense
ENSG00000204178	cg20263885	rs12041604	0.896626	chr1	TMEM57	protein_coding
ENSG00000158882	cg14978304	rs116266331	0.89668	chr1	TOMM40L	protein_coding
ENSG00000186301	cg06959664	rs41272739	0.896691	chr1	MST1P2	unprocessed_pseudogene
ENSG00000127054	cg02573276	rs3121821	0.896819	chr1	CPSF3L	protein_coding
ENSG00000197747	cg01093088	rs201772754	0.896866	chr1	S100A10	protein_coding
ENSG00000197747	cg24332770	rs41267636	0.896997	chr1	S100A10	protein_coding
ENSG00000225828	cg01676680	rs16834996	0.897	chr1	FAM229A	protein_coding
ENSG00000219481	cg07194829	rs1977269	0.897115	chr1	NBPF1	protein_coding
ENSG00000160072	cg22335801	rs35737009	0.897138	chr1	ATAD3B	protein_coding
ENSG00000204178	cg21298759	rs12041604	0.897392	chr1	TMEM57	protein_coding
ENSG00000116138	cg03969515	rs41270281	0.897496	chr1	DNAJC16	protein_coding
ENSG00000116138	cg02987928	rs41270281	0.897528	chr1	DNAJC16	protein_coding
ENSG00000187815	cg23319597	rs736861	0.897633	chr1	ZFP69	protein_coding
ENSG00000160716	cg18006944	rs3811450	0.89765	chr1	CHRNB2	protein_coding
ENSG00000160072	cg11596239	rs1887284	0.897728	chr1	ATAD3B	protein_coding
ENSG00000219481	cg05208572	rs1977269	0.897732	chr1	NBPF1	protein_coding
ENSG00000186715	cg12648811	rs1977269	0.897817	chr1	MST1L	transcribed_unprocessed_pseudogene
ENSG00000204178	cg19697558	rs12041604	0.897969	chr1	TMEM57	protein_coding
ENSG00000078618	cg02899037	rs856613	0.897989	chr1	NRDC	protein_coding
ENSG00000160072	cg14661234	rs35737009	0.898049	chr1	ATAD3B	protein_coding
ENSG00000127054	cg10380643	rs4648631	0.898125	chr1	CPSF3L	protein_coding
ENSG00000186715	cg09004167	rs1977269	0.898145	chr1	MST1L	transcribed_unprocessed_pseudogene
ENSG00000280114	cg03522107	rs2863845	0.898158	chr1	RP5-875O13.7	unprocessed_pseudogene
ENSG00000280114	cg12648811	rs1977269	0.898189	chr1	RP5-875O13.7	unprocessed_pseudogene
ENSG00000215915	cg14743859	rs6704200	0.898249	chr1	ATAD3C	protein_coding
ENSG00000186715	cg05208572	rs1977269	0.89847	chr1	MST1L	transcribed_unprocessed_pseudogene
ENSG00000280114	cg09004167	rs1977269	0.898483	chr1	RP5-875O13.7	unprocessed_pseudogene
ENSG00000235098	cg08663263	rs12731385	0.898506	chr1	ANKRD65	protein_coding
ENSG00000117528	cg21372392	rs947386	0.898708	chr1	ABCD3	protein_coding
ENSG00000117305	cg16262774	rs7514394	0.898834	chr1	HMGCL	protein_coding
ENSG00000227533	cg07803811	rs710217	0.899172	chr1	SLC2A1-AS1	lincRNA
ENSG00000117425	cg18845703	rs34094632	0.899241	chr1	PTCH2	protein_coding
ENSG00000215915	cg11782208	rs1695823	0.899381	chr1	ATAD3C	protein_coding
ENSG00000236200	cg26473777	rs61769029	0.89949	chr1	KDM4A-AS1	antisense
ENSG00000162585	cg15153700	rs56051051	0.899594	chr1	FAAP20	protein_coding
ENSG00000160058	cg03177171	rs115307537	0.899722	chr1	BSDC1	protein_coding
ENSG00000238142	cg02563469	rs4661349	0.899935	chr1	RP11-108M9.4	lincRNA
ENSG00000261168	cg01609658	rs1879533	0.900057	chr1	RP11-68I18.10	sense_overlapping
ENSG00000186715	cg12442246	rs1977269	0.900131	chr1	MST1L	transcribed_unprocessed_pseudogene
ENSG00000186715	cg24791205	rs1977269	0.900154	chr1	MST1L	transcribed_unprocessed_pseudogene
ENSG00000078618	cg03072343	rs12074299	0.900168	chr1	NRDC	protein_coding
ENSG00000219481	cg12648811	rs1977269	0.900219	chr1	NBPF1	protein_coding
ENSG00000236200	cg03782518	rs116428789	0.900239	chr1	KDM4A-AS1	antisense
ENSG00000127054	cg17405058	rs3107155	0.900277	chr1	CPSF3L	protein_coding
ENSG00000085832	cg03814321	rs148648502	0.900615	chr1	EPS15	protein_coding
ENSG00000242485	cg11808581	rs2765020	0.900674	chr1	MRPL20	protein_coding
ENSG00000219481	cg09004167	rs1977269	0.900684	chr1	NBPF1	protein_coding
ENSG00000143387	cg13178372	rs12139770	0.900757	chr1	CTSK	protein_coding
ENSG00000206652	cg17463745	rs12044142	0.900919	chr1	RNU1-1	snRNA
ENSG00000125945	cg18323236	rs11577291	0.900997	chr1	ZNF436	protein_coding
ENSG00000213625	cg04111102	rs10493377	0.901098	chr1	LEPROT	protein_coding
ENSG00000280378	cg19249107	rs114768998	0.901129	chr1	RP4-758J24.6	TEC
ENSG00000125945	cg25108531	rs11577291	0.901373	chr1	ZNF436	protein_coding
ENSG00000173641	cg27540189	rs12141388	0.90171	chr1	HSPB7	protein_coding
ENSG00000227533	cg06792911	rs17387775	0.901713	chr1	SLC2A1-AS1	lincRNA
ENSG00000227533	cg09003612	rs17387775	0.901911	chr1	SLC2A1-AS1	lincRNA
ENSG00000227533	cg12656391	rs17387775	0.901911	chr1	SLC2A1-AS1	lincRNA
ENSG00000171603	cg01934856	rs72855780	0.901977	chr1	CLSTN1	protein_coding
ENSG00000207389	cg25851313	rs113847540	0.902186	chr1	RNU1-4	snRNA
ENSG00000215915	cg10143960	rs1240700	0.902364	chr1	ATAD3C	protein_coding
ENSG00000162585	cg11332951	rs7536087	0.902392	chr1	FAAP20	protein_coding
ENSG00000207005	cg20696698	rs2018430	0.902773	chr1	RNU1-2	snRNA
ENSG00000266472	cg08130307	rs74589051	0.903028	chr1	MRPS21	protein_coding
ENSG00000116138	cg21601498	rs41270281	0.903305	chr1	DNAJC16	protein_coding
ENSG00000117500	cg18146737	rs72730438	0.903341	chr1	TMED5	protein_coding
ENSG00000186301	cg00605147	rs149562	0.903566	chr1	MST1P2	unprocessed_pseudogene
ENSG00000125945	cg14499653	rs12132473	0.903676	chr1	ZNF436	protein_coding
ENSG00000219481	cg24791205	rs1977269	0.903849	chr1	NBPF1	protein_coding
ENSG00000280114	cg17463745	rs2863845	0.903911	chr1	RP5-875O13.7	unprocessed_pseudogene
ENSG00000176022	cg14793596	rs6603782	0.903919	chr1	B3GALT6	protein_coding
ENSG00000116221	cg02607723	rs55817205	0.903928	chr1	MRPL37	protein_coding
ENSG00000280114	cg24791205	rs1977269	0.904026	chr1	RP5-875O13.7	unprocessed_pseudogene
ENSG00000268869	cg24791205	rs10907231	0.904611	chr1	ESPNP	transcribed_unprocessed_pseudogene
ENSG00000268869	cg18117094	rs1977269	0.904651	chr1	ESPNP	transcribed_unprocessed_pseudogene
ENSG00000133059	cg26895569	rs61313780	0.90478	chr1	DSTYK	protein_coding
ENSG00000176022	cg22047469	rs1153105	0.904958	chr1	B3GALT6	protein_coding
ENSG00000127054	cg03648020	rs112495999	0.905246	chr1	CPSF3L	protein_coding
ENSG00000186715	cg18117094	rs1977269	0.905463	chr1	MST1L	transcribed_unprocessed_pseudogene
ENSG00000176022	cg09756115	rs6603782	0.905528	chr1	B3GALT6	protein_coding
ENSG00000176022	cg18770446	rs1153105	0.905584	chr1	B3GALT6	protein_coding
ENSG00000164010	cg19552482	rs12136064	0.905802	chr1	ERMAP	protein_coding
ENSG00000143318	cg11161846	rs1209804	0.90598	chr1	CASQ1	protein_coding
ENSG00000227533	cg00102166	rs710214	0.906189	chr1	SLC2A1-AS1	lincRNA
ENSG00000127054	cg19413397	rs3107155	0.906287	chr1	CPSF3L	protein_coding
ENSG00000176022	cg10143960	rs1153105	0.906324	chr1	B3GALT6	protein_coding
ENSG00000179743	cg14429204	rs4661328	0.906433	chr1	FLJ37453	antisense
ENSG00000261168	cg11690979	rs1879533	0.907042	chr1	RP11-68I18.10	sense_overlapping
ENSG00000143458	cg04446723	rs114315156	0.90726	chr1	GABPB2	protein_coding
ENSG00000004455	cg13623108	rs10914660	0.907327	chr1	AK2	protein_coding
ENSG00000116678	cg06748470	rs9436746	0.907403	chr1	LEPR	protein_coding
ENSG00000197747	cg00647966	rs11205084	0.907462	chr1	S100A10	protein_coding
ENSG00000187147	cg11837102	rs201738480	0.907537	chr1	RNF220	protein_coding
ENSG00000162873	cg24503407	rs61313780	0.907611	chr1	KLHDC8A	protein_coding
ENSG00000162873	cg11965913	rs61313780	0.907666	chr1	KLHDC8A	protein_coding
ENSG00000162873	cg14893161	rs61313780	0.90768	chr1	KLHDC8A	protein_coding
ENSG00000134686	cg15061530	rs9970917	0.907682	chr1	PHC2	protein_coding
ENSG00000004455	cg24237848	rs10914660	0.907752	chr1	AK2	protein_coding
ENSG00000162873	cg05841700	rs61313780	0.907763	chr1	KLHDC8A	protein_coding
ENSG00000162873	cg16334093	rs61313780	0.907804	chr1	KLHDC8A	protein_coding
ENSG00000127054	cg20341253	rs143070056	0.907811	chr1	CPSF3L	protein_coding
ENSG00000162873	cg14159672	rs61313780	0.907816	chr1	KLHDC8A	protein_coding
ENSG00000143369	cg05790073	rs11577302	0.907856	chr1	ECM1	protein_coding
ENSG00000158109	cg24312874	rs34128889	0.907998	chr1	TPRG1L	protein_coding
ENSG00000173614	cg21807930	rs140532807	0.908086	chr1	NMNAT1	protein_coding
ENSG00000133059	cg24503407	rs61313780	0.908089	chr1	DSTYK	protein_coding
ENSG00000121454	cg02763800	rs61812121	0.908095	chr1	LHX4	protein_coding
ENSG00000125945	cg13827179	rs55993452	0.908118	chr1	ZNF436	protein_coding
ENSG00000133059	cg11965913	rs61313780	0.908141	chr1	DSTYK	protein_coding
ENSG00000133059	cg14893161	rs61313780	0.908156	chr1	DSTYK	protein_coding
ENSG00000078618	cg24348107	rs12074299	0.908157	chr1	NRDC	protein_coding
ENSG00000133059	cg05841700	rs61313780	0.908235	chr1	DSTYK	protein_coding
ENSG00000117500	cg09303339	rs9659100	0.90824	chr1	TMED5	protein_coding
ENSG00000133059	cg16334093	rs61313780	0.908276	chr1	DSTYK	protein_coding
ENSG00000133059	cg14159672	rs61313780	0.908287	chr1	DSTYK	protein_coding
ENSG00000249087	cg04703069	rs638722	0.908438	chr1	ZNF436-AS1	antisense
ENSG00000215908	cg10858576	rs11260756	0.908584	chr1	CROCCP2	transcribed_unprocessed_pseudogene
ENSG00000280114	cg18117094	rs1977269	0.908624	chr1	RP5-875O13.7	unprocessed_pseudogene
ENSG00000163131	cg08189652	rs11204760	0.908976	chr1	CTSS	protein_coding
ENSG00000272145	cg15901364	rs7549005	0.909299	chr1	NFYC-AS1	antisense
ENSG00000066136	cg02773041	rs2935895	0.909328	chr1	NFYC	protein_coding
ENSG00000272145	cg07317551	rs7549005	0.909557	chr1	NFYC-AS1	antisense
ENSG00000176022	cg18770446	rs6603782	0.909635	chr1	B3GALT6	protein_coding
ENSG00000261168	cg00036347	rs115847329	0.910145	chr1	RP11-68I18.10	sense_overlapping
ENSG00000196071	cg04157864	rs61857507	0.91022	chr1	OR2L13	protein_coding
ENSG00000272455	cg04919596	rs13303254	0.910237	chr1	RP4-758J18.13	lincRNA
ENSG00000143458	cg24545100	rs114315156	0.910542	chr1	GABPB2	protein_coding
ENSG00000219481	cg18117094	rs1977269	0.910596	chr1	NBPF1	protein_coding
ENSG00000203663	cg15391271	rs55692539	0.910616	chr1	OR2L2	protein_coding
ENSG00000272455	cg18432292	rs13303254	0.910709	chr1	RP4-758J18.13	lincRNA
ENSG00000127054	cg09180820	rs143070056	0.910997	chr1	CPSF3L	protein_coding
ENSG00000164008	cg01934756	rs79549518	0.911118	chr1	C1orf50	protein_coding
ENSG00000127054	cg04339679	rs3121821	0.911253	chr1	CPSF3L	protein_coding
ENSG00000135823	cg11640200	rs2183424	0.911257	chr1	STX6	protein_coding
ENSG00000134686	cg08859095	rs9970917	0.911539	chr1	PHC2	protein_coding
ENSG00000134686	cg12064008	rs9970917	0.911767	chr1	PHC2	protein_coding
ENSG00000181873	cg02525420	rs11800309	0.911787	chr1	IBA57	protein_coding
ENSG00000207005	cg25851313	rs113847540	0.911859	chr1	RNU1-2	snRNA
ENSG00000164008	cg15935905	rs35938849	0.911875	chr1	C1orf50	protein_coding
ENSG00000186409	cg12101479	rs1981080	0.911972	chr1	CCDC30	protein_coding
ENSG00000160058	cg13870102	rs116230501	0.912332	chr1	BSDC1	protein_coding
ENSG00000117407	cg06277031	rs4596943	0.912389	chr1	ARTN	protein_coding
ENSG00000158161	ch.1.28801140F	rs116836168	0.912511	chr1	EYA3	protein_coding
ENSG00000117408	cg05260789	rs41270401	0.912615	chr1	IPO13	protein_coding
ENSG00000272420	cg24729577	rs12069588	0.912943	chr1	RP4-740C4.7	sense_intronic
ENSG00000189171	cg02493487	rs41267636	0.913031	chr1	S100A13	protein_coding
ENSG00000237975	cg03277515	rs34292016	0.913263	chr1	FLG-AS1	antisense
ENSG00000272455	cg01787285	rs908743	0.913316	chr1	RP4-758J18.13	lincRNA
ENSG00000164010	cg09903430	rs72539440	0.913399	chr1	ERMAP	protein_coding
ENSG00000188761	cg00648735	rs6677404	0.913414	chr1	BCL2L15	protein_coding
ENSG00000164008	cg19335498	rs35938849	0.913578	chr1	C1orf50	protein_coding
ENSG00000118298	cg03616833	rs59942146	0.913666	chr1	CA14	protein_coding
ENSG00000157191	cg09819513	rs6603888	0.91536	chr1	NECAP2	protein_coding
ENSG00000117410	cg17781893	rs3216995	0.916237	chr1	ATP6V0B	protein_coding
ENSG00000238142	cg25494767	rs157251	0.916282	chr1	RP11-108M9.4	lincRNA
ENSG00000160058	cg17501574	rs116230501	0.916323	chr1	BSDC1	protein_coding
ENSG00000176022	cg08038080	rs6603782	0.91653	chr1	B3GALT6	protein_coding
ENSG00000186715	cg21858823	rs74407262	0.916582	chr1	MST1L	transcribed_unprocessed_pseudogene
ENSG00000134262	cg22220403	rs11102600	0.916607	chr1	AP4B1	protein_coding
ENSG00000272455	cg24649713	rs11587831	0.916764	chr1	RP4-758J18.13	lincRNA
ENSG00000142937	cg23028072	rs12127328	0.916872	chr1	RPS8	protein_coding
ENSG00000143458	cg05517686	rs114315156	0.917046	chr1	GABPB2	protein_coding
ENSG00000226029	cg20065512	rs1877623	0.9171	chr1	RP4-798A10.2	lincRNA
ENSG00000280114	cg14429204	rs2863845	0.91751	chr1	RP5-875O13.7	unprocessed_pseudogene
ENSG00000206652	cg10445474	rs113847540	0.917619	chr1	RNU1-1	snRNA
ENSG00000142937	cg18446895	rs2201941	0.917676	chr1	RPS8	protein_coding
ENSG00000235098	cg24475622	rs12731385	0.917697	chr1	ANKRD65	protein_coding
ENSG00000163050	cg14255644	rs140622693	0.918184	chr1	ADCK3	protein_coding
ENSG00000235098	cg21779088	rs12731385	0.918669	chr1	ANKRD65	protein_coding
ENSG00000158161	cg08366446	rs12563861	0.919446	chr1	EYA3	protein_coding
ENSG00000160072	cg16347928	rs9329412	0.919834	chr1	ATAD3B	protein_coding
ENSG00000066135	cg24643057	rs114347687	0.9202	chr1	KDM4A	protein_coding
ENSG00000127054	cg26332488	rs149441632	0.920287	chr1	CPSF3L	protein_coding
ENSG00000236200	cg24643057	rs114347687	0.920313	chr1	KDM4A-AS1	antisense
ENSG00000162873	cg26895569	rs61313780	0.920319	chr1	KLHDC8A	protein_coding
ENSG00000235098	cg09363892	rs12731385	0.920376	chr1	ANKRD65	protein_coding
ENSG00000127054	cg09363892	rs12731385	0.920441	chr1	CPSF3L	protein_coding
ENSG00000143318	cg25076881	rs1316275	0.920508	chr1	CASQ1	protein_coding
ENSG00000226029	cg01968256	rs12096215	0.921301	chr1	RP4-798A10.2	lincRNA
ENSG00000185495	cg21058413	rs147505887	0.921305	chr1	RP11-504P24.3	transcribed_unprocessed_pseudogene
ENSG00000121454	cg11824956	rs61812121	0.921538	chr1	LHX4	protein_coding
ENSG00000177868	cg10820528	rs138554701	0.921714	chr1	SVBP	protein_coding
ENSG00000177868	cg21268658	rs141218161	0.922165	chr1	SVBP	protein_coding
ENSG00000158161	cg21870545	rs116836168	0.922233	chr1	EYA3	protein_coding
ENSG00000117407	cg18845703	rs4596943	0.922886	chr1	ARTN	protein_coding
ENSG00000058453	cg26098312	rs12756041	0.923303	chr1	CROCC	protein_coding
ENSG00000238142	cg21645973	rs2019755	0.923623	chr1	RP11-108M9.4	lincRNA
ENSG00000116761	cg17963245	rs192276410	0.923771	chr1	CTH	protein_coding
ENSG00000179743	cg09507771	rs2985126	0.923971	chr1	FLJ37453	antisense
ENSG00000177868	cg25844639	rs141218161	0.924252	chr1	SVBP	protein_coding
ENSG00000162729	cg15442538	rs11265329	0.92429	chr1	IGSF8	protein_coding
ENSG00000198952	cg01088035	rs61813288	0.924526	chr1	SMG5	protein_coding
ENSG00000143374	cg13899718	rs114941413	0.924662	chr1	TARS2	protein_coding
ENSG00000229444	cg19247548	rs78050663	0.924684	chr1	RP11-184I16.4	antisense
ENSG00000223745	cg12167803	rs150029429	0.92482	chr1	CCDC18-AS1	processed_transcript
ENSG00000117505	cg12167803	rs150029429	0.92495	chr1	DR1	protein_coding
ENSG00000236200	cg04307162	rs116786318	0.925049	chr1	KDM4A-AS1	antisense
ENSG00000229444	cg04307162	rs1637284	0.925054	chr1	RP11-184I16.4	antisense
ENSG00000143776	cg19025525	rs116645351	0.925172	chr1	CDC42BPA	protein_coding
ENSG00000215908	cg10858576	rs11260756	0.925202	chr1	CROCCP2	transcribed_unprocessed_pseudogene
ENSG00000163050	cg24846680	rs140622693	0.925264	chr1	ADCK3	protein_coding
ENSG00000176022	cg01789792	rs6603782	0.925687	chr1	B3GALT6	protein_coding
ENSG00000186715	cg16851799	rs11580675	0.925808	chr1	MST1L	transcribed_unprocessed_pseudogene
ENSG00000160072	cg26566407	rs7536087	0.925935	chr1	ATAD3B	protein_coding
ENSG00000236200	cg04307162	rs1637284	0.925973	chr1	KDM4A-AS1	antisense
ENSG00000160072	cg11224984	rs28498068	0.926007	chr1	ATAD3B	protein_coding
ENSG00000117500	cg16684543	rs149531017	0.926079	chr1	TMED5	protein_coding
ENSG00000142632	cg12442246	rs67833669	0.926164	chr1	ARHGEF19	protein_coding
ENSG00000272420	cg08034916	rs35986070	0.926748	chr1	RP4-740C4.7	sense_intronic
ENSG00000185495	cg14849237	rs4653656	0.927121	chr1	RP11-504P24.3	transcribed_unprocessed_pseudogene
ENSG00000280114	cg23105827	rs10927860	0.927438	chr1	RP5-875O13.7	unprocessed_pseudogene
ENSG00000160072	cg26332488	rs4994703	0.927729	chr1	ATAD3B	protein_coding
ENSG00000197747	cg17572196	rs41267636	0.928349	chr1	S100A10	protein_coding
ENSG00000163050	cg24846680	rs138158121	0.928378	chr1	ADCK3	protein_coding
ENSG00000162434	cg10912053	rs1926309	0.928533	chr1	JAK1	protein_coding
ENSG00000186715	cg17463745	rs61433142	0.928883	chr1	MST1L	transcribed_unprocessed_pseudogene
ENSG00000203663	cg15545861	rs55692539	0.929078	chr1	OR2L2	protein_coding
ENSG00000085832	cg00041014	rs148648502	0.929135	chr1	EPS15	protein_coding
ENSG00000134744	cg19995437	rs138390855	0.929994	chr1	ZCCHC11	protein_coding
ENSG00000143434	cg20292245	rs955955	0.930036	chr1	SEMA6C	protein_coding
ENSG00000215908	cg01648953	rs12756041	0.930466	chr1	CROCCP2	transcribed_unprocessed_pseudogene
ENSG00000163393	cg18620631	rs10923890	0.930692	chr1	SLC22A15	protein_coding
ENSG00000164008	cg24483304	rs2008207	0.930761	chr1	C1orf50	protein_coding
ENSG00000186409	cg20700731	rs4660542	0.931201	chr1	CCDC30	protein_coding
ENSG00000143740	cg01318248	rs201027636	0.931243	chr1	SNAP47	protein_coding
ENSG00000117748	cg20819218	rs189756809	0.931626	chr1	RPA2	protein_coding
ENSG00000227533	cg10197057	rs17387775	0.932206	chr1	SLC2A1-AS1	lincRNA
ENSG00000142949	cg19552482	rs710225	0.932407	chr1	PTPRF	protein_coding
ENSG00000215908	cg21645973	rs12756041	0.93299	chr1	CROCCP2	transcribed_unprocessed_pseudogene
ENSG00000272455	cg13865934	rs34817085	0.933378	chr1	RP4-758J18.13	lincRNA
ENSG00000177868	cg02567157	rs141218161	0.933384	chr1	SVBP	protein_coding
ENSG00000219481	cg09787549	rs72639756	0.933667	chr1	NBPF1	protein_coding
ENSG00000164010	cg02567157	rs75307152	0.934794	chr1	ERMAP	protein_coding
ENSG00000187147	cg07159951	rs201738480	0.93554	chr1	RNF220	protein_coding
ENSG00000268869	cg21660130	rs1236822	0.936237	chr1	ESPNP	transcribed_unprocessed_pseudogene
ENSG00000207005	cg17463745	rs12044142	0.936434	chr1	RNU1-2	snRNA
ENSG00000160072	cg02850689	rs4994703	0.936614	chr1	ATAD3B	protein_coding
ENSG00000117748	cg11226328	rs17185038	0.937791	chr1	RPA2	protein_coding
ENSG00000066136	cg10820528	rs4660526	0.937904	chr1	NFYC	protein_coding
ENSG00000143771	cg12060906	rs72747990	0.938129	chr1	CNIH4	protein_coding
ENSG00000207513	cg16109817	rs146556192	0.938469	chr1	RNU1-3	snRNA
ENSG00000207513	cg10321393	rs146556192	0.93864	chr1	RNU1-3	snRNA
ENSG00000160072	cg12053769	rs35611435	0.939735	chr1	ATAD3B	protein_coding
ENSG00000261168	cg02596550	rs6673178	0.941405	chr1	RP11-68I18.10	sense_overlapping
ENSG00000266472	cg05467523	rs61817552	0.941432	chr1	MRPS21	protein_coding
ENSG00000078618	cg08121408	rs78272062	0.941983	chr1	NRDC	protein_coding
ENSG00000117425	cg03335125	rs72676586	0.942282	chr1	PTCH2	protein_coding
ENSG00000188460	cg22352176	rs17476564	0.942731	chr1	ACTBP11	processed_pseudogene
ENSG00000143369	cg18801370	rs10532452	0.94278	chr1	ECM1	protein_coding
ENSG00000207389	cg16109817	rs146556192	0.943953	chr1	RNU1-4	snRNA
ENSG00000207389	cg10321393	rs146556192	0.944126	chr1	RNU1-4	snRNA
ENSG00000085840	cg07364646	rs80069192	0.944739	chr1	ORC1	protein_coding
ENSG00000223745	cg17074213	rs112783550	0.945245	chr1	CCDC18-AS1	processed_transcript
ENSG00000143374	cg01705587	rs7521171	0.948083	chr1	TARS2	protein_coding
ENSG00000229444	cg04118124	rs10789443	0.948277	chr1	RP11-184I16.4	antisense
ENSG00000179743	cg01164671	rs28736783	0.949008	chr1	FLJ37453	antisense
ENSG00000159208	cg05790073	rs61819214	0.949855	chr1	CIART	protein_coding
ENSG00000116514	cg23376894	rs79630412	0.950168	chr1	RNF19B	protein_coding
ENSG00000187147	cg04700938	rs201738480	0.950446	chr1	RNF220	protein_coding
ENSG00000118298	cg05790073	rs59942146	0.95147	chr1	CA14	protein_coding
ENSG00000273487	cg23964342	rs116677839	0.953679	chr1	RP4-621B10.8	lincRNA
ENSG00000142632	cg15590113	rs35960604	0.953842	chr1	ARHGEF19	protein_coding
ENSG00000117500	cg03237839	rs114794189	0.956508	chr1	TMED5	protein_coding
ENSG00000207005	cg10445474	rs113847540	0.957296	chr1	RNU1-2	snRNA
ENSG00000215883	cg03330022	rs61769650	0.959519	chr1	CYB5RL	protein_coding
ENSG00000117505	cg03237839	rs80251022	0.964171	chr1	DR1	protein_coding
ENSG00000116299	cg02266253	rs2761446	0.965894	chr1	KIAA1324	protein_coding
ENSG00000117425	cg03671193	rs111440976	0.966976	chr1	PTCH2	protein_coding
ENSG00000169231	cg15119100	rs148911079	0.968984	chr1	THBS3	protein_coding
ENSG00000117425	cg07673710	rs111440976	0.973864	chr1	PTCH2	protein_coding
ENSG00000138035	cg25124366	rs7596552	0.800581	chr2	PNPT1	protein_coding
ENSG00000118965	cg23811268	rs2242192	0.800677	chr2	WDR35	protein_coding
ENSG00000169629	cg11201567	rs2241976	0.800825	chr2	RGPD8	protein_coding
ENSG00000124383	cg18303261	rs72899728	0.801014	chr2	MPHOSPH10	protein_coding
ENSG00000171303	cg16842187	rs55874196	0.801261	chr2	KCNK3	protein_coding
ENSG00000134324	cg07258474	rs11691889	0.801285	chr2	LPIN1	protein_coding
ENSG00000154518	cg16564277	rs148424118	0.801363	chr2	ATP5G3	protein_coding
ENSG00000115310	cg11238902	rs10208690	0.801383	chr2	RTN4	protein_coding
ENSG00000114999	cg11317677	rs3833479	0.801619	chr2	TTL	protein_coding
ENSG00000115649	cg18887096	rs921968	0.802059	chr2	CNPPD1	protein_coding
ENSG00000279267	cg17711395	rs11684486	0.802082	chr2	RP11-395L14.18	TEC
ENSG00000181378	cg23933193	rs12467665	0.802476	chr2	CFAP65	protein_coding
ENSG00000178623	cg06551828	rs4676411	0.802484	chr2	GPR35	protein_coding
ENSG00000135624	cg05203213	rs909065	0.803049	chr2	CCT7	protein_coding
ENSG00000115685	cg10631368	rs55777737	0.803189	chr2	PPP1R7	protein_coding
ENSG00000072135	cg14825985	rs112040677	0.803192	chr2	PTPN18	protein_coding
ENSG00000135636	cg03170698	rs78820776	0.803202	chr2	DYSF	protein_coding
ENSG00000181378	cg11765003	rs12467665	0.803213	chr2	CFAP65	protein_coding
ENSG00000079156	cg04735635	rs7589907	0.803232	chr2	OSBPL6	protein_coding
ENSG00000162997	cg07999476	rs111606289	0.803313	chr2	PRORSD1P	transcribed_unitary_pseudogene
ENSG00000172292	cg06528485	rs3815679	0.803323	chr2	CERS6	protein_coding
ENSG00000260942	cg03457784	rs112248634	0.80334	chr2	CAPN10-AS1	antisense
ENSG00000065413	cg09096031	rs150462661	0.804003	chr2	ANKRD44	protein_coding
ENSG00000144152	cg06024411	rs6708896	0.80403	chr2	FBLN7	protein_coding
ENSG00000115556	cg14110710	rs832800	0.804234	chr2	PLCD4	protein_coding
ENSG00000065802	cg12524725	rs72983863	0.80433	chr2	ASB1	protein_coding
ENSG00000153214	cg00212275	rs4848992	0.804848	chr2	TMEM87B	protein_coding
ENSG00000115685	cg01835656	rs6709462	0.804865	chr2	PPP1R7	protein_coding
ENSG00000134324	cg06500134	rs7591344	0.80499	chr2	LPIN1	protein_coding
ENSG00000115685	cg01588581	rs2074829	0.805314	chr2	PPP1R7	protein_coding
ENSG00000127824	cg06894303	rs1109866	0.805371	chr2	TUBA4A	protein_coding
ENSG00000138378	cg08081450	rs13006096	0.805408	chr2	STAT4	protein_coding
ENSG00000115687	cg01763239	rs2074829	0.805436	chr2	PASK	protein_coding
ENSG00000204822	cg05038466	rs1063588	0.805664	chr2	MRPL53	protein_coding
ENSG00000122085	cg12310130	rs76679054	0.80569	chr2	MTERF4	protein_coding
ENSG00000122085	cg11642880	rs55938551	0.805728	chr2	MTERF4	protein_coding
ENSG00000135636	cg16273873	rs6725697	0.805878	chr2	DYSF	protein_coding
ENSG00000134324	cg19893438	rs11691889	0.806354	chr2	LPIN1	protein_coding
ENSG00000115687	cg17116034	rs10933531	0.80683	chr2	PASK	protein_coding
ENSG00000072182	cg02527669	rs7597875	0.807397	chr2	ASIC4	protein_coding
ENSG00000122085	cg07612300	rs2302042	0.807399	chr2	MTERF4	protein_coding
ENSG00000134324	cg01876978	rs11691889	0.807642	chr2	LPIN1	protein_coding
ENSG00000118997	cg23392804	rs60151241	0.807681	chr2	DNAH7	protein_coding
ENSG00000162804	cg03785076	rs113226763	0.80802	chr2	SNED1	protein_coding
ENSG00000144152	cg07880854	rs9308669	0.808096	chr2	FBLN7	protein_coding
ENSG00000181378	cg09617556	rs7592246	0.808337	chr2	CFAP65	protein_coding
ENSG00000115282	cg07373867	rs3755440	0.808673	chr2	TTC31	protein_coding
ENSG00000134324	cg01158574	rs11691889	0.808936	chr2	LPIN1	protein_coding
ENSG00000134324	cg17916490	rs11691889	0.808974	chr2	LPIN1	protein_coding
ENSG00000225449	cg00401745	rs4600594	0.809073	chr2	RAB6C-AS1	transcribed_unprocessed_pseudogene
ENSG00000162994	cg05084827	rs17046778	0.809179	chr2	CLHC1	protein_coding
ENSG00000135636	cg00013475	rs35526551	0.809357	chr2	DYSF	protein_coding
ENSG00000135636	cg10944735	rs6725697	0.80936	chr2	DYSF	protein_coding
ENSG00000134324	cg13827224	rs11691889	0.809641	chr2	LPIN1	protein_coding
ENSG00000072135	cg12519248	rs185083462	0.809676	chr2	PTPN18	protein_coding
ENSG00000178623	cg22079149	rs4676411	0.809801	chr2	GPR35	protein_coding
ENSG00000142327	cg04034577	rs62187251	0.809825	chr2	RNPEPL1	protein_coding
ENSG00000144136	cg16771198	rs186446441	0.809935	chr2	SLC20A1	protein_coding
ENSG00000124357	cg19421443	rs66885555	0.809991	chr2	NAGK	protein_coding
ENSG00000134324	cg19584871	rs11691889	0.810116	chr2	LPIN1	protein_coding
ENSG00000144231	cg19921829	rs112636716	0.810426	chr2	POLR2D	protein_coding
ENSG00000115687	cg00189101	rs10933531	0.810501	chr2	PASK	protein_coding
ENSG00000231747	cg26324010	rs113369144	0.810783	chr2	AC079922.2	processed_pseudogene
ENSG00000122085	cg10314439	rs55938551	0.810994	chr2	MTERF4	protein_coding
ENSG00000134324	cg09295081	rs11691889	0.811649	chr2	LPIN1	protein_coding
ENSG00000127824	cg06889481	rs72955832	0.81217	chr2	TUBA4A	protein_coding
ENSG00000072182	cg11027285	rs7597875	0.812228	chr2	ASIC4	protein_coding
ENSG00000153208	cg11931949	rs72825673	0.812325	chr2	MERTK	protein_coding
ENSG00000135636	cg11027058	rs10779954	0.812366	chr2	DYSF	protein_coding
ENSG00000135624	cg01329511	rs62147624	0.812509	chr2	CCT7	protein_coding
ENSG00000153208	cg06723287	rs72825673	0.812603	chr2	MERTK	protein_coding
ENSG00000134324	cg02069619	rs3795974	0.812654	chr2	LPIN1	protein_coding
ENSG00000134324	cg01242772	rs11691889	0.813101	chr2	LPIN1	protein_coding
ENSG00000072182	cg27185933	rs7597875	0.813141	chr2	ASIC4	protein_coding
ENSG00000204822	cg11955373	rs7605410	0.813153	chr2	MRPL53	protein_coding
ENSG00000125618	cg27273780	rs2863243	0.813503	chr2	PAX8	protein_coding
ENSG00000135636	cg15370332	rs6725697	0.813812	chr2	DYSF	protein_coding
ENSG00000236107	cg25116839	rs4386334	0.813864	chr2	AC010127.3	antisense
ENSG00000135617	cg24691835	rs72846979	0.814048	chr2	PRADC1	protein_coding
ENSG00000072135	cg19407943	rs11683316	0.814119	chr2	PTPN18	protein_coding
ENSG00000144152	cg11676442	rs6708896	0.814372	chr2	FBLN7	protein_coding
ENSG00000197872	cg06448298	rs1722418	0.814417	chr2	FAM49A	protein_coding
ENSG00000146205	cg21638035	rs35155396	0.814644	chr2	ANO7	protein_coding
ENSG00000115274	cg11955373	rs2240443	0.814664	chr2	INO80B	protein_coding
ENSG00000142327	cg21238404	rs62186545	0.814816	chr2	RNPEPL1	protein_coding
ENSG00000260942	cg13892514	rs72620858	0.814843	chr2	CAPN10-AS1	antisense
ENSG00000171174	cg15747402	rs150398273	0.815019	chr2	RBKS	protein_coding
ENSG00000135636	cg16965027	rs6725697	0.815187	chr2	DYSF	protein_coding
ENSG00000236209	cg02715572	rs66649485	0.815295	chr2	AC104135.2	lincRNA
ENSG00000237753	cg25377510	rs7607358	0.815503	chr2	AC079922.3	lincRNA
ENSG00000236209	cg16570455	rs12366	0.815548	chr2	AC104135.2	lincRNA
ENSG00000115685	cg20014207	rs73013893	0.815593	chr2	PPP1R7	protein_coding
ENSG00000189223	cg27273780	rs4849177	0.815767	chr2	PAX8-AS1	processed_transcript
ENSG00000196975	cg03227191	rs200996112	0.816036	chr2	ANXA4	protein_coding
ENSG00000178623	cg13097816	rs4676411	0.816077	chr2	GPR35	protein_coding
ENSG00000144043	cg24573743	rs7583998	0.816135	chr2	TEX261	protein_coding
ENSG00000162927	cg18485141	rs144276542	0.816238	chr2	PUS10	protein_coding
ENSG00000135636	cg14958017	rs13032033	0.816345	chr2	DYSF	protein_coding
ENSG00000144134	cg07276183	rs115862875	0.816656	chr2	RABL2A	protein_coding
ENSG00000146205	cg11564239	rs77183814	0.817288	chr2	ANO7	protein_coding
ENSG00000122085	cg24269863	rs55938551	0.817518	chr2	MTERF4	protein_coding
ENSG00000153214	cg06024411	rs6708896	0.817586	chr2	TMEM87B	protein_coding
ENSG00000163013	cg05203213	rs17008885	0.817747	chr2	FBXO41	protein_coding
ENSG00000135636	cg17974684	rs13032033	0.81784	chr2	DYSF	protein_coding
ENSG00000186235	cg26686512	rs143142867	0.81795	chr2	AC016757.3	processed_transcript
ENSG00000115274	cg05038466	rs1063588	0.81846	chr2	INO80B	protein_coding
ENSG00000072182	cg07959018	rs6436153	0.818665	chr2	ASIC4	protein_coding
ENSG00000144136	cg01263739	rs58129446	0.818718	chr2	SLC20A1	protein_coding
ENSG00000153214	cg26001287	rs28637361	0.818811	chr2	TMEM87B	protein_coding
ENSG00000235072	cg26165826	rs138089631	0.818823	chr2	AC012074.2	lincRNA
ENSG00000231747	cg10898730	rs6711037	0.818824	chr2	AC079922.2	processed_pseudogene
ENSG00000187944	cg23720379	rs10931765	0.818869	chr2	C2orf66	protein_coding
ENSG00000135636	cg00672622	rs6725697	0.8189	chr2	DYSF	protein_coding
ENSG00000130414	cg23482872	rs7603433	0.819002	chr2	NDUFA10	protein_coding
ENSG00000231747	cg01804891	rs11678996	0.819519	chr2	AC079922.2	processed_pseudogene
ENSG00000236107	cg23808213	rs201399353	0.819881	chr2	AC010127.3	antisense
ENSG00000018510	cg27440866	rs112136982	0.819972	chr2	AGPS	protein_coding
ENSG00000169629	cg02452253	rs34980063	0.820003	chr2	RGPD8	protein_coding
ENSG00000138030	cg22740783	rs11126836	0.820159	chr2	KHK	protein_coding
ENSG00000144043	cg22387939	rs191519435	0.820423	chr2	TEX261	protein_coding
ENSG00000144043	cg22520507	rs191519435	0.820427	chr2	TEX261	protein_coding
ENSG00000135636	cg17974684	rs78820776	0.820507	chr2	DYSF	protein_coding
ENSG00000115649	cg24352985	rs34001204	0.820791	chr2	CNPPD1	protein_coding
ENSG00000088205	cg01352656	rs72834333	0.820971	chr2	DDX18	protein_coding
ENSG00000235072	cg06621861	rs11681084	0.820981	chr2	AC012074.2	lincRNA
ENSG00000197121	cg21300403	rs4241192	0.82105	chr2	PGAP1	protein_coding
ENSG00000163016	cg22996555	rs72814192	0.821183	chr2	ALMS1P1	transcribed_unprocessed_pseudogene
ENSG00000153107	cg26324010	rs12999807	0.821531	chr2	ANAPC1	protein_coding
ENSG00000144040	cg27456519	rs139159939	0.821597	chr2	SFXN5	protein_coding
ENSG00000270574	cg03991736	rs12464787	0.82162	chr2	RP11-171I2.2	antisense
ENSG00000181378	cg10115987	rs200887150	0.821669	chr2	CFAP65	protein_coding
ENSG00000172428	cg10631368	rs10432570	0.821725	chr2	COPS9	protein_coding
ENSG00000138073	cg27296547	rs58242251	0.82195	chr2	PREB	protein_coding
ENSG00000240356	cg07276183	rs115862875	0.822847	chr2	RPL23AP7	transcribed_processed_pseudogene
ENSG00000124383	cg21610384	rs741161	0.823483	chr2	MPHOSPH10	protein_coding
ENSG00000153214	cg11676442	rs6708896	0.823523	chr2	TMEM87B	protein_coding
ENSG00000018510	cg26709537	rs59274646	0.823561	chr2	AGPS	protein_coding
ENSG00000138074	cg04178439	rs62130680	0.823573	chr2	SLC5A6	protein_coding
ENSG00000130414	cg16061482	rs7603433	0.82366	chr2	NDUFA10	protein_coding
ENSG00000115687	cg11723410	rs10933531	0.823803	chr2	PASK	protein_coding
ENSG00000127824	cg22385231	rs1109866	0.8241	chr2	TUBA4A	protein_coding
ENSG00000153107	cg16771198	rs12999807	0.824104	chr2	ANAPC1	protein_coding
ENSG00000115241	cg04000199	rs11126714	0.824557	chr2	PPM1G	protein_coding
ENSG00000278962	cg07880854	rs7580507	0.824759	chr2	RP11-399B17.1	TEC
ENSG00000240356	cg07276183	rs58934170	0.82504	chr2	RPL23AP7	transcribed_processed_pseudogene
ENSG00000153107	cg21389524	rs7600096	0.825325	chr2	ANAPC1	protein_coding
ENSG00000138085	cg06536868	rs11692776	0.825424	chr2	ATRAID	protein_coding
ENSG00000115687	cg23852488	rs10933531	0.82552	chr2	PASK	protein_coding
ENSG00000138085	cg00470044	rs76263646	0.82601	chr2	ATRAID	protein_coding
ENSG00000125618	cg07276183	rs55786321	0.826015	chr2	PAX8	protein_coding
ENSG00000138029	cg00967120	rs41288775	0.826579	chr2	HADHB	protein_coding
ENSG00000163016	cg18326616	rs17349049	0.826607	chr2	ALMS1P1	transcribed_unprocessed_pseudogene
ENSG00000189223	cg11635702	rs59544264	0.826632	chr2	PAX8-AS1	processed_transcript
ENSG00000196950	cg13869872	rs7558395	0.827075	chr2	SLC39A10	protein_coding
ENSG00000236209	cg00702091	rs66649485	0.827165	chr2	AC104135.2	lincRNA
ENSG00000134324	cg14420123	rs7591344	0.827213	chr2	LPIN1	protein_coding
ENSG00000115687	cg06779884	rs10933531	0.82747	chr2	PASK	protein_coding
ENSG00000186235	cg03294225	rs1867935	0.827673	chr2	AC016757.3	processed_transcript
ENSG00000135925	cg15490781	rs3840475	0.827707	chr2	WNT10A	protein_coding
ENSG00000143970	cg25046621	rs6546577	0.827744	chr2	ASXL2	protein_coding
ENSG00000138074	cg10956977	rs116230865	0.828826	chr2	SLC5A6	protein_coding
ENSG00000273275	cg12452813	rs2278789	0.828831	chr2	RP11-474G23.2	antisense
ENSG00000197872	cg11514839	rs181357259	0.829185	chr2	FAM49A	protein_coding
ENSG00000115685	cg22463529	rs34667857	0.8294	chr2	PPP1R7	protein_coding
ENSG00000115687	cg15989276	rs10933531	0.829526	chr2	PASK	protein_coding
ENSG00000196659	cg27490568	rs10497499	0.83002	chr2	TTC30B	protein_coding
ENSG00000197121	cg00792783	rs10182318	0.830133	chr2	PGAP1	protein_coding
ENSG00000236209	cg23692114	rs12366	0.830241	chr2	AC104135.2	lincRNA
ENSG00000075292	cg24334149	rs6546697	0.830312	chr2	ZNF638	protein_coding
ENSG00000144320	cg10607685	rs11682260	0.830648	chr2	KIAA1715	protein_coding
ENSG00000138074	cg14242246	rs76263646	0.830695	chr2	SLC5A6	protein_coding
ENSG00000154518	cg17273725	rs57022618	0.830891	chr2	ATP5G3	protein_coding
ENSG00000187944	cg02514318	rs10931765	0.83095	chr2	C2orf66	protein_coding
ENSG00000236209	cg08541846	rs12366	0.831284	chr2	AC104135.2	lincRNA
ENSG00000144136	cg01804891	rs4368335	0.831367	chr2	SLC20A1	protein_coding
ENSG00000124356	cg24220031	rs17009396	0.8314	chr2	STAMBP	protein_coding
ENSG00000115687	cg21399778	rs10933531	0.831425	chr2	PASK	protein_coding
ENSG00000162994	cg22480459	rs10197309	0.831759	chr2	CLHC1	protein_coding
ENSG00000075292	cg07972565	rs61739971	0.832008	chr2	ZNF638	protein_coding
ENSG00000118965	cg04406400	rs1017446	0.832113	chr2	WDR35	protein_coding
ENSG00000236209	cg10293909	rs12366	0.832325	chr2	AC104135.2	lincRNA
ENSG00000018280	cg05933241	rs6722049	0.832404	chr2	SLC11A1	protein_coding
ENSG00000260942	cg10937776	rs112248634	0.832479	chr2	CAPN10-AS1	antisense
ENSG00000144320	cg05881870	rs11682260	0.832597	chr2	KIAA1715	protein_coding
ENSG00000138074	cg12946832	rs62130680	0.832898	chr2	SLC5A6	protein_coding
ENSG00000079785	cg18822792	rs73915402	0.832899	chr2	DDX1	protein_coding
ENSG00000240401	cg12795981	rs116265454	0.833024	chr2	AC012358.8	antisense
ENSG00000115687	cg01588581	rs2074829	0.833164	chr2	PASK	protein_coding
ENSG00000144136	cg26445457	rs4368335	0.833323	chr2	SLC20A1	protein_coding
ENSG00000134324	cg02069619	rs2358126	0.83375	chr2	LPIN1	protein_coding
ENSG00000221823	cg03161775	rs7586748	0.834377	chr2	PPP3R1	protein_coding
ENSG00000054356	cg03739129	rs34967637	0.834474	chr2	PTPRN	protein_coding
ENSG00000138101	cg26995204	rs60756214	0.834686	chr2	DTNB	protein_coding
ENSG00000115687	cg01835656	rs10933531	0.83497	chr2	PASK	protein_coding
ENSG00000186235	cg21532103	rs2304669	0.835424	chr2	AC016757.3	processed_transcript
ENSG00000134324	cg25654774	rs3795974	0.835699	chr2	LPIN1	protein_coding
ENSG00000213225	cg19257464	rs11674689	0.83572	chr2	NOC2LP1	transcribed_processed_pseudogene
ENSG00000181378	cg09297636	rs7592246	0.83575	chr2	CFAP65	protein_coding
ENSG00000231747	cg11339384	rs11678996	0.835856	chr2	AC079922.2	processed_pseudogene
ENSG00000143947	cg03820688	rs77518853	0.836119	chr2	RPS27A	protein_coding
ENSG00000163013	cg17264028	rs7588946	0.836214	chr2	FBXO41	protein_coding
ENSG00000162997	cg06299644	rs111606289	0.836272	chr2	PRORSD1P	transcribed_unitary_pseudogene
ENSG00000115649	cg24578623	rs34001204	0.836601	chr2	CNPPD1	protein_coding
ENSG00000235655	cg23895340	rs115937222	0.836623	chr2	H3F3AP4	processed_pseudogene
ENSG00000134324	cg16440984	rs3795974	0.836625	chr2	LPIN1	protein_coding
ENSG00000146556	cg22329711	rs4849195	0.836698	chr2	WASH2P	transcribed_unprocessed_pseudogene
ENSG00000119772	cg01400712	rs7588724	0.836749	chr2	DNMT3A	protein_coding
ENSG00000138071	cg15247039	rs75723206	0.837029	chr2	ACTR2	protein_coding
ENSG00000124374	cg27183962	rs2111591	0.837457	chr2	PAIP2B	protein_coding
ENSG00000186235	cg17032848	rs143142867	0.837926	chr2	AC016757.3	processed_transcript
ENSG00000138074	cg00470044	rs76263646	0.838219	chr2	SLC5A6	protein_coding
ENSG00000144136	cg03495769	rs58129446	0.839032	chr2	SLC20A1	protein_coding
ENSG00000163170	cg02237855	rs72822155	0.839956	chr2	BOLA3	protein_coding
ENSG00000128655	cg00037058	rs76771282	0.840384	chr2	PDE11A	protein_coding
ENSG00000143970	cg12257341	rs10865438	0.840552	chr2	ASXL2	protein_coding
ENSG00000217702	cg07909619	rs56208981	0.840737	chr2	RP11-287D1.4	lincRNA
ENSG00000138101	cg08847512	rs60756214	0.840748	chr2	DTNB	protein_coding
ENSG00000181378	cg17931041	rs12463605	0.84089	chr2	CFAP65	protein_coding
ENSG00000135925	cg00981994	rs3840475	0.841005	chr2	WNT10A	protein_coding
ENSG00000171303	cg19236247	rs1554902	0.84118	chr2	KCNK3	protein_coding
ENSG00000225449	cg08886046	rs11679667	0.841351	chr2	RAB6C-AS1	transcribed_unprocessed_pseudogene
ENSG00000146205	cg13892514	rs35155396	0.841393	chr2	ANO7	protein_coding
ENSG00000115415	cg24782228	rs148393549	0.841764	chr2	STAT1	protein_coding
ENSG00000144040	cg17264028	rs73943410	0.841769	chr2	SFXN5	protein_coding
ENSG00000136718	cg12519248	rs4458251	0.841817	chr2	IMP4	protein_coding
ENSG00000231943	cg21854348	rs4252041	0.842164	chr2	PGM5P4-AS1	lincRNA
ENSG00000138074	cg25522894	rs76263646	0.842356	chr2	SLC5A6	protein_coding
ENSG00000115310	cg19008784	rs2627767	0.843087	chr2	RTN4	protein_coding
ENSG00000204334	cg19846314	rs2356236	0.8431	chr2	ERICH2	protein_coding
ENSG00000115310	cg14053055	rs34155202	0.843319	chr2	RTN4	protein_coding
ENSG00000079785	cg14520482	rs73915402	0.843425	chr2	DDX1	protein_coding
ENSG00000144043	cg05939956	rs2418653	0.843447	chr2	TEX261	protein_coding
ENSG00000163013	cg24220031	rs11692420	0.843561	chr2	FBXO41	protein_coding
ENSG00000135624	cg17264028	rs3817459	0.843747	chr2	CCT7	protein_coding
ENSG00000213225	cg14417784	rs11691267	0.843857	chr2	NOC2LP1	transcribed_processed_pseudogene
ENSG00000231747	cg09759994	rs6711037	0.844183	chr2	AC079922.2	processed_pseudogene
ENSG00000163013	cg26965637	rs11692420	0.84433	chr2	FBXO41	protein_coding
ENSG00000243667	cg03161775	rs7586748	0.845	chr2	WDR92	protein_coding
ENSG00000144136	cg11339384	rs4368335	0.845107	chr2	SLC20A1	protein_coding
ENSG00000054356	cg24743778	rs34967637	0.845348	chr2	PTPRN	protein_coding
ENSG00000128655	cg26082400	rs72648258	0.845454	chr2	PDE11A	protein_coding
ENSG00000260942	cg13892514	rs72620858	0.845637	chr2	CAPN10-AS1	antisense
ENSG00000115685	cg23302603	rs34667857	0.846804	chr2	PPP1R7	protein_coding
ENSG00000171303	cg01704636	rs55874196	0.847184	chr2	KCNK3	protein_coding
ENSG00000153107	cg02242681	rs12999807	0.847681	chr2	ANAPC1	protein_coding
ENSG00000231747	cg21086293	rs11678996	0.848082	chr2	AC079922.2	processed_pseudogene
ENSG00000138029	cg27170947	rs13383267	0.84815	chr2	HADHB	protein_coding
ENSG00000143970	cg20371505	rs10198667	0.848328	chr2	ASXL2	protein_coding
ENSG00000135925	cg16937778	rs3840475	0.848634	chr2	WNT10A	protein_coding
ENSG00000115685	cg15211453	rs34667857	0.848748	chr2	PPP1R7	protein_coding
ENSG00000162804	cg25798782	rs7419333	0.848756	chr2	SNED1	protein_coding
ENSG00000233392	cg02826735	rs147061844	0.848771	chr2	AC104809.4	processed_transcript
ENSG00000171303	cg27485108	rs67888806	0.848792	chr2	KCNK3	protein_coding
ENSG00000144161	cg08852667	rs72825607	0.849223	chr2	ZC3H8	protein_coding
ENSG00000135925	cg24813176	rs3840475	0.849459	chr2	WNT10A	protein_coding
ENSG00000138074	cg04902443	rs78250434	0.849591	chr2	SLC5A6	protein_coding
ENSG00000154518	cg03838215	rs56262474	0.849716	chr2	ATP5G3	protein_coding
ENSG00000197872	cg21145290	rs72783861	0.849716	chr2	FAM49A	protein_coding
ENSG00000162928	cg01923102	rs3814032	0.849768	chr2	PEX13	protein_coding
ENSG00000236209	cg22052672	rs66649485	0.849998	chr2	AC104135.2	lincRNA
ENSG00000162804	cg26250154	rs2953152	0.850413	chr2	SNED1	protein_coding
ENSG00000079785	cg11502844	rs7598483	0.850488	chr2	DDX1	protein_coding
ENSG00000162994	cg25477606	rs17046778	0.850727	chr2	CLHC1	protein_coding
ENSG00000162994	cg26336264	rs17046778	0.85078	chr2	CLHC1	protein_coding
ENSG00000162994	cg02717117	rs17046778	0.850814	chr2	CLHC1	protein_coding
ENSG00000162994	cg05027052	rs17046778	0.850835	chr2	CLHC1	protein_coding
ENSG00000144231	cg17651576	rs869146	0.851172	chr2	POLR2D	protein_coding
ENSG00000135925	cg00011225	rs3840475	0.851439	chr2	WNT10A	protein_coding
ENSG00000144136	cg21086293	rs4368335	0.851954	chr2	SLC20A1	protein_coding
ENSG00000146556	cg11635702	rs1448866	0.852203	chr2	WASH2P	transcribed_unprocessed_pseudogene
ENSG00000118997	cg00230895	rs12620948	0.852539	chr2	DNAH7	protein_coding
ENSG00000163013	cg12870699	rs11692420	0.852846	chr2	FBXO41	protein_coding
ENSG00000115415	cg24528866	rs57250041	0.853335	chr2	STAT1	protein_coding
ENSG00000144134	cg27665312	rs7560480	0.853438	chr2	RABL2A	protein_coding
ENSG00000144134	cg22972126	rs7577893	0.853539	chr2	RABL2A	protein_coding
ENSG00000163016	cg17264028	rs17349049	0.853866	chr2	ALMS1P1	transcribed_unprocessed_pseudogene
ENSG00000267520	cg17854533	rs34402009	0.853888	chr2	RP11-373L24.1	3prime_overlapping_ncRNA
ENSG00000135925	cg26094599	rs67367269	0.853906	chr2	WNT10A	protein_coding
ENSG00000072135	cg18754629	rs185083462	0.854038	chr2	PTPN18	protein_coding
ENSG00000163093	cg06674089	rs11901329	0.85428	chr2	BBS5	protein_coding
ENSG00000115275	cg15080077	rs62149809	0.855132	chr2	MOGS	protein_coding
ENSG00000079785	cg06970082	rs7598483	0.85517	chr2	DDX1	protein_coding
ENSG00000217702	cg19325132	rs6714060	0.85532	chr2	RP11-287D1.4	lincRNA
ENSG00000136718	cg07894391	rs6729562	0.855349	chr2	IMP4	protein_coding
ENSG00000163093	cg12071679	rs58003485	0.855378	chr2	BBS5	protein_coding
ENSG00000217702	cg19729930	rs6714060	0.855388	chr2	RP11-287D1.4	lincRNA
ENSG00000079785	cg24674087	rs73915402	0.85555	chr2	DDX1	protein_coding
ENSG00000171303	cg20491914	rs55874196	0.856426	chr2	KCNK3	protein_coding
ENSG00000225449	cg11722376	rs4600594	0.856504	chr2	RAB6C-AS1	transcribed_unprocessed_pseudogene
ENSG00000138073	cg06869899	rs143904516	0.856622	chr2	PREB	protein_coding
ENSG00000072182	cg02144258	rs56042015	0.856883	chr2	ASIC4	protein_coding
ENSG00000135925	cg06862374	rs67367269	0.856981	chr2	WNT10A	protein_coding
ENSG00000235655	cg14666564	rs80043438	0.8571	chr2	H3F3AP4	processed_pseudogene
ENSG00000163482	cg18102446	rs62182180	0.857313	chr2	STK36	protein_coding
ENSG00000127824	cg05001691	rs1109866	0.857318	chr2	TUBA4A	protein_coding
ENSG00000138029	cg07549406	rs13383267	0.857779	chr2	HADHB	protein_coding
ENSG00000075292	cg00707127	rs56300167	0.857871	chr2	ZNF638	protein_coding
ENSG00000162804	cg12184255	rs2953152	0.858306	chr2	SNED1	protein_coding
ENSG00000162804	cg19506686	rs113226763	0.859467	chr2	SNED1	protein_coding
ENSG00000079785	cg09951666	rs2302932	0.86014	chr2	DDX1	protein_coding
ENSG00000072135	cg18743464	rs112040677	0.860928	chr2	PTPN18	protein_coding
ENSG00000136731	cg19998573	rs6732051	0.86097	chr2	UGGT1	protein_coding
ENSG00000079785	cg02038690	rs12475009	0.861148	chr2	DDX1	protein_coding
ENSG00000115556	cg21838310	rs62193334	0.861251	chr2	PLCD4	protein_coding
ENSG00000135925	cg20888386	rs3840475	0.861314	chr2	WNT10A	protein_coding
ENSG00000135925	cg22344703	rs67367269	0.861317	chr2	WNT10A	protein_coding
ENSG00000162804	cg20375721	rs7419333	0.861429	chr2	SNED1	protein_coding
ENSG00000236209	cg01739446	rs66649485	0.861491	chr2	AC104135.2	lincRNA
ENSG00000138074	cg03562199	rs116230865	0.861541	chr2	SLC5A6	protein_coding
ENSG00000236209	cg03368481	rs66649485	0.86196	chr2	AC104135.2	lincRNA
ENSG00000125630	cg00212275	rs4848992	0.862041	chr2	POLR1B	protein_coding
ENSG00000135925	cg12001120	rs67367269	0.862358	chr2	WNT10A	protein_coding
ENSG00000240253	cg12519248	rs12232961	0.862409	chr2	FAR2P3	transcribed_unprocessed_pseudogene
ENSG00000128655	cg21570130	rs6745398	0.862649	chr2	PDE11A	protein_coding
ENSG00000128655	cg27008248	rs6710329	0.862649	chr2	PDE11A	protein_coding
ENSG00000146205	cg11463903	rs6437282	0.862782	chr2	ANO7	protein_coding
ENSG00000257800	cg17105139	rs3755439	0.86307	chr2	FNBP1P1	processed_pseudogene
ENSG00000240253	cg07894391	rs6729562	0.86316	chr2	FAR2P3	transcribed_unprocessed_pseudogene
ENSG00000163170	cg00327537	rs1667601	0.863161	chr2	BOLA3	protein_coding
ENSG00000128654	cg12504882	rs112729575	0.863282	chr2	MTX2	protein_coding
ENSG00000115355	cg02986924	rs113795361	0.863334	chr2	CCDC88A	protein_coding
ENSG00000115556	cg08908213	rs12998464	0.863479	chr2	PLCD4	protein_coding
ENSG00000079263	cg04727866	rs183056273	0.863791	chr2	SP140	protein_coding
ENSG00000135925	cg22587479	rs67367269	0.86438	chr2	WNT10A	protein_coding
ENSG00000115275	cg11125589	rs62149809	0.865522	chr2	MOGS	protein_coding
ENSG00000072135	cg07815799	rs6431119	0.865655	chr2	PTPN18	protein_coding
ENSG00000088205	cg23729417	rs11689073	0.865774	chr2	DDX18	protein_coding
ENSG00000115685	cg09347723	rs34667857	0.865918	chr2	PPP1R7	protein_coding
ENSG00000115685	cg24828208	rs34667857	0.866349	chr2	PPP1R7	protein_coding
ENSG00000127824	cg13409952	rs1024131	0.866379	chr2	TUBA4A	protein_coding
ENSG00000178623	cg01835656	rs6730107	0.866561	chr2	GPR35	protein_coding
ENSG00000172428	cg14842376	rs74000120	0.866584	chr2	COPS9	protein_coding
ENSG00000135925	cg22167208	rs3840475	0.86698	chr2	WNT10A	protein_coding
ENSG00000135925	cg14639163	rs3840475	0.867016	chr2	WNT10A	protein_coding
ENSG00000178623	cg21399778	rs6730107	0.86711	chr2	GPR35	protein_coding
ENSG00000088205	cg09450085	rs11689073	0.86713	chr2	DDX18	protein_coding
ENSG00000217702	cg05776053	rs4563249	0.867162	chr2	RP11-287D1.4	lincRNA
ENSG00000114978	cg00327537	rs1667601	0.86725	chr2	MOB1A	protein_coding
ENSG00000162804	cg11036279	rs7419333	0.867463	chr2	SNED1	protein_coding
ENSG00000272606	cg05027052	rs4671267	0.868211	chr2	RP11-554J4.1	antisense
ENSG00000272606	cg02717117	rs4671267	0.868236	chr2	RP11-554J4.1	antisense
ENSG00000135624	cg17046766	rs58649746	0.868261	chr2	CCT7	protein_coding
ENSG00000157851	cg19084174	rs74601329	0.8684	chr2	DPYSL5	protein_coding
ENSG00000154518	cg25047379	rs115375493	0.869144	chr2	ATP5G3	protein_coding
ENSG00000115556	cg12001120	rs13022785	0.869237	chr2	PLCD4	protein_coding
ENSG00000235072	cg26870999	rs679112	0.869611	chr2	AC012074.2	lincRNA
ENSG00000125618	cg00422909	rs2863243	0.869629	chr2	PAX8	protein_coding
ENSG00000135925	cg00518417	rs3840475	0.869767	chr2	WNT10A	protein_coding
ENSG00000115339	cg23702716	rs10497272	0.869885	chr2	GALNT3	protein_coding
ENSG00000275052	cg16719235	rs6718247	0.870127	chr2	PPP4R3B	protein_coding
ENSG00000072182	cg04255268	rs56171119	0.87029	chr2	ASIC4	protein_coding
ENSG00000125618	cg09704166	rs7576384	0.870416	chr2	PAX8	protein_coding
ENSG00000125618	cg07594247	rs7576384	0.870483	chr2	PAX8	protein_coding
ENSG00000187605	cg07909619	rs28569001	0.870559	chr2	TET3	protein_coding
ENSG00000125618	cg23156509	rs7576384	0.870657	chr2	PAX8	protein_coding
ENSG00000125618	cg23122642	rs7576384	0.870938	chr2	PAX8	protein_coding
ENSG00000125618	cg21482265	rs7576384	0.871079	chr2	PAX8	protein_coding
ENSG00000115649	cg22712983	rs34001204	0.871146	chr2	CNPPD1	protein_coding
ENSG00000125618	cg01577475	rs2863243	0.871608	chr2	PAX8	protein_coding
ENSG00000127824	cg22845754	rs1024131	0.871702	chr2	TUBA4A	protein_coding
ENSG00000125618	cg19083407	rs7576384	0.871712	chr2	PAX8	protein_coding
ENSG00000125618	cg17445212	rs2863243	0.87178	chr2	PAX8	protein_coding
ENSG00000127824	cg00496455	rs2071385	0.871833	chr2	TUBA4A	protein_coding
ENSG00000125618	cg02675527	rs7576384	0.871886	chr2	PAX8	protein_coding
ENSG00000217702	cg05890377	rs4563249	0.871966	chr2	RP11-287D1.4	lincRNA
ENSG00000125618	cg11763394	rs7576384	0.871967	chr2	PAX8	protein_coding
ENSG00000123607	cg06915970	rs1432275	0.87205	chr2	TTC21B	protein_coding
ENSG00000125618	cg07772999	rs2863243	0.872063	chr2	PAX8	protein_coding
ENSG00000125618	cg21550016	rs2863243	0.872105	chr2	PAX8	protein_coding
ENSG00000127824	cg23977332	rs1024131	0.872125	chr2	TUBA4A	protein_coding
ENSG00000235192	cg00918282	rs2304003	0.872135	chr2	AC009495.2	lincRNA
ENSG00000125618	cg06675538	rs2863243	0.872201	chr2	PAX8	protein_coding
ENSG00000127824	cg01693157	rs939574	0.872454	chr2	TUBA4A	protein_coding
ENSG00000127824	cg03253255	rs939574	0.872975	chr2	TUBA4A	protein_coding
ENSG00000189223	cg23156509	rs4849177	0.87344	chr2	PAX8-AS1	processed_transcript
ENSG00000127824	cg08378442	rs939574	0.873474	chr2	TUBA4A	protein_coding
ENSG00000127824	cg16725050	rs939574	0.873485	chr2	TUBA4A	protein_coding
ENSG00000127824	cg08396863	rs1024131	0.873542	chr2	TUBA4A	protein_coding
ENSG00000217702	cg19729930	rs4563249	0.873566	chr2	RP11-287D1.4	lincRNA
ENSG00000189223	cg09704166	rs4849177	0.873567	chr2	PAX8-AS1	processed_transcript
ENSG00000127824	cg11348442	rs939574	0.873602	chr2	TUBA4A	protein_coding
ENSG00000127824	cg08640923	rs939574	0.873629	chr2	TUBA4A	protein_coding
ENSG00000217702	cg20891558	rs4563249	0.873849	chr2	RP11-287D1.4	lincRNA
ENSG00000217702	cg01017244	rs4563249	0.874227	chr2	RP11-287D1.4	lincRNA
ENSG00000138101	cg21494337	rs114793284	0.874285	chr2	DTNB	protein_coding
ENSG00000186235	cg00573606	rs1867935	0.874424	chr2	AC016757.3	processed_transcript
ENSG00000225449	cg07929412	rs4600594	0.874589	chr2	RAB6C-AS1	transcribed_unprocessed_pseudogene
ENSG00000225449	cg18754629	rs13398687	0.874676	chr2	RAB6C-AS1	transcribed_unprocessed_pseudogene
ENSG00000163013	cg16545223	rs11692420	0.874951	chr2	FBXO41	protein_coding
ENSG00000189223	cg00422909	rs4849177	0.875061	chr2	PAX8-AS1	processed_transcript
ENSG00000189223	cg07594247	rs4849177	0.875109	chr2	PAX8-AS1	processed_transcript
ENSG00000135925	cg08243612	rs3840475	0.875348	chr2	WNT10A	protein_coding
ENSG00000114978	cg18326616	rs1723292	0.875475	chr2	MOB1A	protein_coding
ENSG00000189223	cg23122642	rs4849177	0.87601	chr2	PAX8-AS1	processed_transcript
ENSG00000115241	cg00500027	rs4665854	0.87602	chr2	PPM1G	protein_coding
ENSG00000189223	cg21482265	rs4849177	0.876041	chr2	PAX8-AS1	processed_transcript
ENSG00000115380	cg03128421	rs191694417	0.876192	chr2	EFEMP1	protein_coding
ENSG00000189223	cg19083407	rs4849177	0.876477	chr2	PAX8-AS1	processed_transcript
ENSG00000079785	cg09951666	rs2302932	0.876853	chr2	DDX1	protein_coding
ENSG00000189223	cg02675527	rs4849177	0.876866	chr2	PAX8-AS1	processed_transcript
ENSG00000189223	cg17445212	rs4849177	0.87707	chr2	PAX8-AS1	processed_transcript
ENSG00000189223	cg11763394	rs4849177	0.877106	chr2	PAX8-AS1	processed_transcript
ENSG00000189223	cg01577475	rs4849177	0.877178	chr2	PAX8-AS1	processed_transcript
ENSG00000123607	cg22847367	rs144677180	0.877183	chr2	TTC21B	protein_coding
ENSG00000189223	cg21550016	rs4849177	0.877316	chr2	PAX8-AS1	processed_transcript
ENSG00000189223	cg07772999	rs4849177	0.877457	chr2	PAX8-AS1	processed_transcript
ENSG00000189223	cg06675538	rs4849177	0.877798	chr2	PAX8-AS1	processed_transcript
ENSG00000257800	cg19543987	rs502930	0.87862	chr2	FNBP1P1	processed_pseudogene
ENSG00000257800	cg06433106	rs502930	0.878939	chr2	FNBP1P1	processed_pseudogene
ENSG00000127824	cg27638196	rs72955832	0.878961	chr2	TUBA4A	protein_coding
ENSG00000236107	cg09800774	rs4386334	0.879105	chr2	AC010127.3	antisense
ENSG00000127824	cg23933193	rs1024131	0.880118	chr2	TUBA4A	protein_coding
ENSG00000146205	cg27214687	rs35155396	0.880547	chr2	ANO7	protein_coding
ENSG00000114978	cg08529030	rs6546946	0.880587	chr2	MOB1A	protein_coding
ENSG00000065802	cg01112020	rs502932	0.88137	chr2	ASB1	protein_coding
ENSG00000144134	cg04170071	rs6748854	0.881728	chr2	RABL2A	protein_coding
ENSG00000115556	cg21838310	rs62193334	0.882521	chr2	PLCD4	protein_coding
[truncated: 7,683 more rows]
