# Supplementary material for: QTL mapping of human retina DNA methylation identifies 87 gene-epigenome interactions in age-related macular degeneration
Source: Research Square preprint supplement (doi:10.21203/rs.3.rs-3011096/v1), 2023-06-16
Supplement: Supplementary file 34 [file Supplementary_Table2.xlsx]

## Sheet: meQTLs
CpG	chr	CpG_start	CpG_end	snp	hg38_pos_start	hg38_pos_end	Rank	Backward_nom_pval	Backward_slope	Backward_slope_se	Retina_specific
cg08128007	chr1	904056	904055	rs4475691	911428	911428	0	1.54301e-12	-0.367056	0.0475621	FALSE
cg23733394	chr1	904373	904372	rs4411087:834832:G:C	899452	899452	0	4.57295e-17	-0.922416	0.0970257	FALSE
cg01789792	chr1	923168	923167	1:860788:TTGGCGC:T	925408	925414	0	4.07521e-08	-0.514408	0.0889163	TRUE
cg00582671	chr1	936856	936855	rs4504834:871683:G:A	936303	936303	0	1.37788e-08	-0.223936	0.037286	TRUE
cg07582955	chr1	961384	961383	exm2253575	946247	946247	0	1.03488e-06	-0.0922182	0.0181004	TRUE
cg07390924	chr1	966346	966345	rs7522959:905165:A:G	969785	969785	0	4.37542e-08	0.280251	0.0485646	TRUE
cg25107893	chr1	976222	976221	rs28552711:918238:C:G	982858	982858	0	3.95292e-18	1.10772	0.11174	FALSE
cg25107893	chr1	976222	976221	rs7417106:911595:A:G	976215	976215	1	7.15991e-08	0.827101	0.145907	TRUE
cg05505459	chr1	976616	976615	rs28552711:918238:C:G	982858	982858	0	3.78537e-25	0.741544	0.0590944	FALSE
cg23635910	chr1	976676	976675	rs2341354	983193	983193	0	1.32441e-24	-1.09357	0.088583	FALSE
cg23635910	chr1	976676	976675	rs9777703	993456	993456	1	2.7156e-06	1.42193	0.291539	TRUE
cg09582238	chr1	981284	981283	rs2341354	983193	983193	0	9.71166e-08	-0.156686	0.0279544	TRUE
cg11782208	chr1	982513	982512	rs2341354	983193	983193	0	5.47785e-07	0.173497	0.0331416	TRUE
cg03394722	chr1	984537	984536	rs2341357:919998:A:C	984618	984618	0	4.32697e-15	-0.324692	0.0371495	TRUE
cg03648020	chr1	995948	995947	rs6665587:927741:G:A	992361	992361	0	1.81933e-08	0.173114	0.0290958	FALSE
cg00447632	chr1	1000482	1000481	rs2710882:930923:A:G	995543	995543	0	1.55486e-24	0.365105	0.0296371	FALSE
cg26339484	chr1	1000484	1000483	rs3121571:935492:G:T	1000112	1000112	0	2.88677e-24	0.400195	0.0327525	FALSE
cg09363892	chr1	1019240	1019239	rs9442612:953952:G:A	1018572	1018572	0	2.07361e-19	-0.274675	0.0264143	FALSE
cg03185752	chr1	1019252	1019251	rs9442612:953952:G:A	1018572	1018572	0	6.16531e-18	-0.286336	0.0290996	FALSE
cg00299257	chr1	1020838	1020837	rs151160018:776556:C:T	841176	841176	0	6.814e-14	1.07126	0.129599	TRUE
cg02138082	chr1	1043194	1043193	rs35881187:978603:CCT:C	1043223	1043225	0	1.46356e-10	-0.368428	0.0534976	FALSE
cg04919596	chr1	1060675	1060674	rs2799072:990773:C:T	1055393	1055393	0	2.54246e-07	0.18483	0.0342206	TRUE
cg21779088	chr1	1065477	1065476	rs60881902:984494:GC:G	1049114	1049115	0	1.92015e-12	0.250928	0.0326797	TRUE
cg18432292	chr1	1068376	1068375	rs4246502:1002932:C:G	1067552	1067552	0	2.32709e-29	0.48628	0.0344151	FALSE
cg24475622	chr1	1068472	1068471	rs4246502:1002932:C:G	1067552	1067552	0	1.22554e-07	0.121408	0.0218511	FALSE
cg11200797	chr1	1081091	1081090	rs2275812:985446:G:T	1050066	1050066	0	2.44947e-09	-0.20021	0.0315379	TRUE
cg23812948	chr1	1095277	1095276	rs36161240:1043829:A:G	1108449	1108449	0	8.36564e-07	0.161011	0.0313131	FALSE
cg00918900	chr1	1121956	1121955	rs80109121:1044319:C:T	1108939	1108939	0	1.42149e-07	0.19081	0.0345366	TRUE
cg05528516	chr1	1134661	1134660	rs112054464:1069420:G:C	1134040	1134040	0	5.07925e-07	-0.19199	0.036559	TRUE
cg22433276	chr1	1137263	1137262	rs56956005:1072613:C:G	1137233	1137233	0	4.68375e-18	0.295975	0.0299408	TRUE
cg12097325	chr1	1141052	1141051	rs55750860:1077962:C:T	1142582	1142582	0	5.89723e-07	0.25035	0.04797	TRUE
cg13560058	chr1	1161854	1161853	rs55750860:1077962:C:T	1142582	1142582	0	4.22555e-07	-0.141596	0.0267588	TRUE
cg27631599	chr1	1173441	1173440	rs11260536:1108518:T:C	1173138	1173138	0	1.39833e-07	0.288134	0.0521195	TRUE
cg21288685	chr1	1173865	1173864	rs11260536:1108518:T:C	1173138	1173138	0	3.26138e-17	0.24286	0.025395	TRUE
cg10143960	chr1	1174107	1174106	rs11260543:1110127:C:T	1174747	1174747	0	2.16738e-23	0.816413	0.068654	FALSE
cg01511231	chr1	1174297	1174296	rs11260543:1110127:C:T	1174747	1174747	0	5.88896e-18	0.585088	0.0594151	FALSE
cg03278726	chr1	1174453	1174452	rs11260536:1108518:T:C	1173138	1173138	0	6.49262e-23	0.724349	0.061838	FALSE
cg15417666	chr1	1174461	1174460	rs11260545:1110368:C:T	1174988	1174988	0	4.07215e-16	0.650066	0.0711189	FALSE
cg18770446	chr1	1174604	1174603	rs11260536:1108518:T:C	1173138	1173138	0	2.06675e-14	0.372338	0.0439482	FALSE
cg22047469	chr1	1174728	1174727	rs11260537:1109554:G:C	1174174	1174174	0	3.048e-13	0.496753	0.0620608	FALSE
cg04154653	chr1	1197869	1197868	rs61768488:1127948:A:C	1192568	1192568	0	2.65604e-08	-0.213454	0.0363452	FALSE
cg00086243	chr1	1207026	1207025	rs4314833:1122024:T:C	1186644	1186644	0	7.09163e-07	0.184396	0.0356086	FALSE
cg22335801	chr1	1213712	1213711	rs115516254:1127561:T:C	1192181	1192181	0	1.66361e-07	-0.472635	0.0860658	TRUE
cg14661234	chr1	1213813	1213812	rs78717314:1124974:C:T	1189594	1189594	0	5.38004e-12	-0.539005	0.0719291	FALSE
cg00657094	chr1	1238811	1238810	rs78107697:1161866:C:T	1226486	1226486	0	8.89922e-09	-0.150875	0.0247598	FALSE
cg20411340	chr1	1239991	1239990	rs77994686:1170982:C:A	1235602	1235602	0	8.45539e-30	-0.460898	0.0322392	FALSE
cg24034746	chr1	1240472	1240471	rs77994686:1170982:C:A	1235602	1235602	0	1.55512e-18	-0.463126	0.0460024	FALSE
cg09331144	chr1	1240997	1240996	rs77994686:1170982:C:A	1235602	1235602	0	7.14323e-26	-0.604103	0.0471245	FALSE
cg00211609	chr1	1242660	1242659	rs12036216:1153113:G:A	1217733	1217733	0	1.32635e-17	-0.246842	0.0254139	TRUE
cg12345380	chr1	1244682	1244681	rs77994686:1170982:C:A	1235602	1235602	0	3.68096e-11	-0.400416	0.0560558	FALSE
cg02279987	chr1	1246378	1246377	rs75972122:1151973:G:C	1216593	1216593	0	3.86672e-14	-0.235094	0.0281075	TRUE
cg26314055	chr1	1247279	1247278	rs12089192:1171022:G:C	1235642	1235642	0	6.60801e-15	-0.680758	0.0785384	FALSE
cg20747739	chr1	1247878	1247877	1:1183443:T:C	1248063	1248063	0	1.89794e-10	-0.212328	0.031051	TRUE
cg17405058	chr1	1301824	1301823	rs11260584:1239339:T:G	1303959	1303959	0	8.09858e-12	0.39203	0.0528367	FALSE
cg21679391	chr1	1351538	1351537	rs2765029:1316670:C:G	1381290	1381290	0	7.66296e-08	-0.269423	0.047647	TRUE
cg14793596	chr1	1354713	1354712	rs34050356:2078250:T:G	2146811	2146811	0	9.5511e-08	0.56826	0.101321	TRUE
cg17132079	chr1	1358761	1358760	rs1810745:1257593:A:G	1322213	1322213	0	9.80233e-09	0.306763	0.0505023	TRUE
cg22273474	chr1	1358886	1358885	rs150789461:1284490:G:A	1349110	1349110	0	4.42981e-14	0.383361	0.0459634	TRUE
cg18550476	chr1	1358974	1358973	rs1810745:1257593:A:G	1322213	1322213	0	2.41654e-07	0.261784	0.0483709	TRUE
cg00970622	chr1	1358983	1358982	rs28755011:1436059:C:T	1500679	1500679	0	1.24873e-07	1.69063	0.304496	TRUE
cg00970622	chr1	1358983	1358982	rs150215528:1301807:AGTGTGATTGAATGAGT:A	1366427	1366443	1	5.46558e-07	1.2077	0.230675	TRUE
cg02416993	chr1	1364380	1364379	1:1299479:CCATG:C	1364099	1364103	0	7.88856e-15	-0.276846	0.0320515	TRUE
cg05397857	chr1	1369791	1369790	rs12410087:1239935:A:C	1304555	1304555	0	1.00701e-18	0.310028	0.0305777	FALSE
cg18546249	chr1	1375649	1375648	rs9730511:1311542:G:C	1376162	1376162	0	3.6659e-26	-0.263417	0.0203761	TRUE
cg00060374	chr1	1419856	1419855	rs1781134:1357461:C:T	1422081	1422081	0	4.76031e-17	0.497238	0.0523396	TRUE
cg22827694	chr1	1421063	1421062	rs34817085:1350601:G:T	1415221	1415221	0	5.6949e-07	0.245575	0.0469864	TRUE
cg15633699	chr1	1421349	1421348	rs1781133:1355583:C:A	1420203	1420203	0	4.95246e-09	0.337323	0.0543197	TRUE
cg10380643	chr1	1421385	1421384	rs1781135:1358571:T:A	1423191	1423191	0	9.45649e-08	0.184212	0.0328326	FALSE
cg10156298	chr1	1426097	1426096	rs200966758:1359141:CCAT:C	1423761	1423764	0	6.52778e-08	0.314758	0.0553379	TRUE
cg12208770	chr1	1426287	1426286	rs200966758:1359141:CCAT:C	1423761	1423764	0	1.11885e-07	0.19778	0.0354741	TRUE
cg00391668	chr1	1468694	1468693	rs61776614:2166406:C:T	2234967	2234967	0	1.63526e-06	-0.161838	0.0324167	TRUE
cg16601494	chr1	1540358	1540357	rs7517401:1483010:G:A	1547630	1547630	0	1.44999e-10	0.500677	0.0726825	FALSE
cg15487867	chr1	1540363	1540362	rs7516190:1485347:C:G	1549967	1549967	0	8.86564e-09	0.489191	0.0802702	TRUE
cg00955674	chr1	1543448	1543447	rs35890823:1514790:AT:A	1579410	1579411	0	9.50333e-10	0.164736	0.0252208	TRUE
cg16848272	chr1	1575612	1575611	rs3766176:1486903:T:C	1551523	1551523	0	1.02206e-09	-0.265436	0.0407251	TRUE
cg09172260	chr1	1600722	1600721	rs12032637	1530002	1530002	0	2.10926e-10	0.734988	0.107799	FALSE
cg11649182	chr1	1604544	1604543	exm3962	1616547	1616547	0	7.46912e-07	-0.143097	0.0276944	TRUE
cg26976576	chr1	1632173	1632172	rs112512195:1524998:A:T	1589618	1589618	0	4.71327e-07	-0.187228	0.0355419	FALSE
cg14976190	chr1	1684298	1684297	rs138369165:1639046:C:G	1707607	1707607	0	1.01142e-07	-0.113781	0.0203306	TRUE
cg16990280	chr1	1743241	1743240	rs11486028:1674677:G:C	1743238	1743238	0	3.42412e-10	0.228695	0.0339983	TRUE
cg02400530	chr1	1779442	1779441	rs2748969:1867377:T:C	1935938	1935938	0	1.92168e-07	-0.109038	0.019967	FALSE
cg13336641	chr1	1789011	1789010	rs70937183:1651077:C:CTCGCTCTGTCACCCAGGCT	1719638	1719638	0	7.16256e-07	-0.21493	0.0415226	TRUE
cg03445765	chr1	1878157	1878156	rs11260629:1705945:T:C	1774506	1774506	0	4.60612e-08	-0.149075	0.0258808	FALSE
cg15827003	chr1	1891474	1891473	GIANT-BMI-Euro-Sex-Combined_chr1_1723031	1791592	1791592	0	6.55571e-08	0.216549	0.0380776	FALSE
cg23982607	chr1	1891941	1891940	1:1866721:T:C	1935282	1935282	0	1.82414e-07	-0.158096	0.0288919	TRUE
cg10096055	chr1	1919727	1919726	rs36018191:1889356:C:A	1957917	1957917	0	7.76498e-11	0.384179	0.0548429	FALSE
cg01428437	chr1	1920726	1920725	rs2803341:1878628:C:T	1947189	1947189	0	1.23729e-08	0.126787	0.0210346	FALSE
cg13027345	chr1	1930306	1930305	rs56378990:1163474:A:G	1228094	1228094	0	1.11314e-06	-0.236298	0.0465283	TRUE
cg08967668	chr1	1935888	1935887	rs2803325:1872412:C:T	1940973	1940973	0	2.35501e-16	0.264418	0.0286395	TRUE
cg11456906	chr1	1937682	1937681	rs3121831:1866004:G:A	1934565	1934565	0	1.42005e-16	-0.284097	0.0304906	TRUE
cg17747265	chr1	1944342	1944341	rs2803333:1875530:G:C	1944091	1944091	0	2.22017e-26	-0.596395	0.0458438	FALSE
cg03396347	chr1	1944365	1944364	rs2803332:1875513:T:C	1944074	1944074	0	7.75108e-26	-0.504581	0.0394018	FALSE
cg19684894	chr1	1944432	1944431	rs941530:1858309:T:C	1926870	1926870	0	1.50071e-21	-0.485703	0.0433531	FALSE
cg24525340	chr1	1946097	1946096	rs2803295:1861582:C:T	1930143	1930143	0	4.265e-15	0.122298	0.0139888	FALSE
cg13111532	chr1	1955105	1955104	exm4806	1955580	1955580	0	3.75689e-09	-0.952269	0.152012	FALSE
cg13111532	chr1	1955105	1955104	rs74473635:1886204:A:AGAGT	1954765	1954765	1	5.23083e-08	-0.679084	0.118435	TRUE
cg12035532	chr1	1955327	1955326	rs151085750:1884029:A:AAAAG	1952590	1952590	0	1.08224e-08	-0.26396	0.0435979	TRUE
cg22619719	chr1	1960140	1960139	rs76274023:1911326:G:A	1979887	1979887	0	3.84578e-07	-0.133257	0.0250863	TRUE
cg24495298	chr1	1966347	1966346	rs61233860:1900106:T:TCTC	1968667	1968667	0	8.86688e-12	-0.150423	0.0203185	TRUE
cg00213113	chr1	2001732	2001731	rs6675751:1926102:G:C	1994663	1994663	0	4.55863e-08	-0.230099	0.0399324	TRUE
cg03580279	chr1	2084536	2084535	rs2490561:2023504:T:C	2092065	2092065	0	5.07945e-13	-0.203106	0.0256628	FALSE
cg04349178	chr1	2094786	2094785	rs13303198:2020905:C:T	2089466	2089466	0	3.67595e-08	-0.116642	0.0200883	FALSE
cg12639453	chr1	2104342	2104341	rs3128337:2045882:A:G	2114443	2114443	0	5.80644e-16	-0.216135	0.0238015	FALSE
cg26910870	chr1	2115490	2115489	rs3107149:2050195:A:T	2118756	2118756	0	6.69612e-07	-0.122616	0.0236208	FALSE
cg03732007	chr1	2139878	2139877	rs262663:2084598:T:C	2153159	2153159	0	3.63646e-23	0.294933	0.024978	FALSE
cg08510499	chr1	2139964	2139963	rs3128293:2065339:A:G	2133900	2133900	0	5.48146e-08	-0.160144	0.0279769	TRUE
cg06854565	chr1	2157340	2157339	rs262675:2079682:A:G	2148243	2148243	0	1.98814e-10	0.203633	0.0298176	TRUE
cg24578937	chr1	2159376	2159375	rs74747369:2055850:G:A	2124411	2124411	0	7.59605e-10	0.202821	0.0308485	FALSE
cg24649713	chr1	2194541	2194540	rs34825103:2120733:T:TG	2189294	2189294	0	2.79533e-11	0.173562	0.0241266	TRUE
cg00656881	chr1	2207319	2207318	rs262663:2084598:T:C	2153159	2153159	0	9.03025e-19	-0.489035	0.0481477	FALSE
cg27528222	chr1	2207515	2207514	rs145625268:2087035:GTGA:G	2155596	2155599	0	2.41564e-11	-0.291998	0.0404397	TRUE
cg02185870	chr1	2237791	2237790	rs34974355:2166484:A:AT	2235045	2235045	0	3.41925e-09	0.175422	0.0279205	TRUE
cg26566407	chr1	2271493	2271492	rs260512:2182470:G:A	2251031	2251031	0	7.63082e-10	-0.149632	0.0227616	FALSE
cg06087623	chr1	2271574	2271573	rs34137908:2195452:TA:T	2264013	2264014	0	2.44092e-12	-0.128024	0.0167669	FALSE
cg11224984	chr1	2271607	2271606	rs263531:2164935:G:T	2233496	2233496	0	1.94839e-12	-0.1453	0.0189295	FALSE
cg21194808	chr1	2274060	2274059	rs12047069:2205548:A:C	2274109	2274109	0	6.70424e-11	-0.268978	0.0382487	TRUE
cg02421543	chr1	93345270	93345269	rs61799471:93663458:A:G	93197901	93197901	0	1.26605e-15	-0.211856	0.0236737	FALSE
cg14300062	chr1	93584717	93584716	rs12740779:94053973:A:G	93588416	93588416	0	7.83398e-10	-0.206584	0.031449	TRUE
cg01466031	chr1	93585148	93585147	rs35193256:94052066:AT:A	93586509	93586510	0	1.17316e-15	-0.310202	0.0346135	TRUE
cg00624378	chr1	93692608	93692607	rs1106833:94045355:T:C	93579798	93579798	0	6.06245e-12	0.860431	0.115154	TRUE
cg20651314	chr1	93732688	93732687	rs143191232:94317436:A:T	93851880	93851880	0	1.61481e-06	-0.243269	0.0486999	TRUE
cg09160344	chr1	93845838	93845837	rs12097812:94309777:T:C	93844221	93844221	0	8.48086e-10	0.181519	0.0276974	FALSE
cg16731318	chr1	93847788	93847787	rs12097812:94309777:T:C	93844221	93844221	0	3.84712e-38	0.62811	0.0358268	FALSE
cg17344060	chr1	93879611	93879610	rs58410484:94196349:C:T	93730793	93730793	0	7.687e-08	-0.275148	0.0486651	TRUE
cg15054400	chr1	93879931	93879930	rs17881810:94360756:G:C	93895200	93895200	0	1.58972e-09	-0.358581	0.0557463	TRUE
cg04831900	chr1	93882548	93882547	rs71813532:94349976:CTT:C	93884420	93884422	0	3.03051e-08	-0.142665	0.0244036	FALSE
cg25275758	chr1	93996120	93996119	exm75970	93996161	93996161	0	7.53253e-09	0.495003	0.0807931	TRUE
cg00397522	chr1	94012846	94012845	rs567370:94478573:C:T	94013017	94013017	0	1.19891e-11	0.163512	0.0222513	FALSE
cg22475139	chr1	94092570	94092569	rs4147882:94558255:TA:T	94092699	94092700	0	1.83567e-10	0.189322	0.0276613	TRUE
cg08916447	chr1	94117451	94117450	rs3838282:94583038:A:G	94117482	94117482	0	1.02405e-09	0.161903	0.0248418	TRUE
cg04491808	chr1	94119897	94119896	rs61773101:95582202:T:C	95116646	95116646	0	3.39541e-07	0.24166	0.0452641	TRUE
cg24150153	chr1	94237908	94237907	rs17396055:94730954:G:A	94265398	94265398	0	1.23546e-06	-0.102998	0.0203741	FALSE
cg24061914	chr1	94542924	94542923	rs1361600	94542362	94542362	0	1.3195e-09	-0.134951	0.0208629	TRUE
cg27295434	chr1	94544122	94544121	rs1361600	94542362	94542362	0	2.25272e-12	0.134357	0.0175632	FALSE
cg24013761	chr1	94808614	94808613	rs6686047	94808408	94808408	0	1.74849e-25	-0.333088	0.0262815	FALSE
cg20817062	chr1	94819794	94819793	rs6662427:95224881:G:A	94759325	94759325	0	1.12056e-07	-0.108516	0.0194646	TRUE
cg22424108	chr1	94819976	94819975	rs6693769:95271529:T:C	94805973	94805973	0	3.49775e-11	0.130364	0.0182261	FALSE
cg00505133	chr1	94854904	94854903	rs146053551:95424925:A:G	94959369	94959369	0	4.82777e-08	-0.327296	0.0569172	TRUE
cg06578870	chr1	94856126	94856125	rs71652586:95321573:G:C	94856017	94856017	0	1.12455e-08	-0.222463	0.0367907	FALSE
cg10607462	chr1	94926000	94925999	rs76032537:95391570:A:G	94926014	94926014	0	4.50528e-10	0.186304	0.0279127	TRUE
cg01206378	chr1	95233272	95233271	rs259349:95726637:T:A	95261081	95261081	0	1.12252e-06	0.196179	0.0386429	TRUE
cg21372392	chr1	95234028	95234027	rs6666528	95231934	95231934	0	2.73918e-41	1.15407	0.0613705	FALSE
cg00666014	chr1	95438065	95438064	rs12729821:95899507:T:G	95433951	95433951	0	2.73015e-08	-0.105961	0.0180595	FALSE
cg20535221	chr1	95509677	95509676	rs874821	95507474	95507474	0	9.33865e-07	-0.0878764	0.0171714	TRUE
cg26267890	chr1	95954464	95954463	rs1379970:96455093:T:C	95989537	95989537	0	5.69263e-07	-0.171452	0.0328037	TRUE
cg26506488	chr1	96236167	96236166	rs651499:96704585:T:A	96239029	96239029	0	4.75232e-27	-0.298033	0.0224758	FALSE
cg10096813	chr1	96389121	96389120	rs1592193:96365356:G:A	95899800	95899800	0	1.99532e-11	1.08851	0.150024	TRUE
cg13557213	chr1	96473975	96473974	rs12138749:96935938:A:G	96470382	96470382	0	8.53074e-08	-0.231447	0.0410937	FALSE
cg08223091	chr1	96753232	96753231	rs150293311:96250919:A:C	95785363	95785363	0	1.89839e-09	0.937145	0.146477	TRUE
cg05763335	chr1	97457885	97457884	rs12129397:97900552:A:T	97434996	97434996	0	1.1543e-07	0.0987444	0.0177318	FALSE
cg20421623	chr1	98429957	98429956	rs996770:98895530:A:G	98429974	98429974	0	1.3272e-09	-0.143887	0.0222484	FALSE
cg13239004	chr1	98749004	98749003	rs9659936:99178663:A:C	98713107	98713107	0	1.42945e-28	1.26803	0.0916718	TRUE
cg05108386	chr1	99503615	99503614	rs60546763:99972474:C:CA	99506918	99506918	0	3.57081e-07	-0.10467	0.0196452	TRUE
cg10841437	chr1	99544552	99544551	rs57760329:100011883:A:T	99546327	99546327	0	4.57822e-10	-0.14177	0.0212502	TRUE
cg10424513	chr1	99657535	99657534	rs834984:100123338:G:A	99657782	99657782	0	2.83698e-07	-0.226312	0.0420843	FALSE
cg05009352	chr1	99685839	99685838	rs58405312:100159552:C:CT	99693996	99693996	0	2.04469e-09	0.228298	0.035764	TRUE
cg04308687	chr1	99766127	99766126	rs7543433:100277039:T:C	99811483	99811483	0	1.18193e-10	0.196393	0.0283526	FALSE
cg20948262	chr1	99766422	99766421	rs7543433:100277039:T:C	99811483	99811483	0	2.38905e-08	0.19088	0.0323825	TRUE
cg10018845	chr1	99766469	99766468	rs7543433:100277039:T:C	99811483	99811483	0	3.2938e-12	0.182604	0.0240845	FALSE
cg19951356	chr1	99766483	99766482	rs72040433:100223506:GA:G	99757950	99757951	0	1.67676e-08	-0.153785	0.0257756	TRUE
cg24916377	chr1	99766639	99766638	1:100275518:CTT:C	99809962	99809964	0	1.77148e-07	0.196044	0.0357861	TRUE
cg19693677	chr1	99790854	99790853	rs76833637:100630934:A:G	100165378	100165378	0	4.60578e-12	-0.709195	0.0942882	TRUE
cg21562973	chr1	99809167	99809166	rs6688707:100268408:G:T	99802852	99802852	0	1.16526e-06	-0.0939463	0.0185357	FALSE
cg25758167	chr1	99849535	99849534	rs7543433:100277039:T:C	99811483	99811483	0	1.17619e-25	-0.332113	0.0260721	FALSE
cg14553297	chr1	99850908	99850907	rs9887771:100276744:C:G	99811188	99811188	0	3.52732e-11	-0.227519	0.0318163	FALSE
cg01933228	chr1	99851082	99851081	rs7543433:100277039:T:C	99811483	99811483	0	1.5584e-25	-0.48027	0.0378387	FALSE
cg03956908	chr1	99852266	99852265	rs7543433:100277039:T:C	99811483	99811483	0	3.95177e-08	-0.131207	0.0226546	FALSE
cg27425127	chr1	99852666	99852665	rs7543433:100277039:T:C	99811483	99811483	0	5.46219e-30	-0.566793	0.039448	FALSE
cg16724148	chr1	99860783	99860782	rs71660907:100223619:G:C	99758063	99758063	0	1.06223e-08	-0.389464	0.0642876	FALSE
cg14063843	chr1	99860796	99860795	rs71660907:100223619:G:C	99758063	99758063	0	3.14418e-11	-0.440343	0.0613959	FALSE
cg11347139	chr1	100037020	100037019	rs72728119:100518832:T:C	100053276	100053276	0	6.3901e-09	-0.264432	0.0429308	FALSE
cg04637881	chr1	100250216	100250215	rs60926925:100716456:T:TTTTG	100250900	100250900	0	2.50132e-23	1.02398	0.0862774	TRUE
cg11312524	chr1	100266243	100266242	rs4908058:100763868:T:A	100298312	100298312	0	3.28031e-19	0.323641	0.03135	FALSE
cg21895262	chr1	100266251	100266250	rs4908058:100763868:T:A	100298312	100298312	0	2.27006e-16	0.225914	0.0244527	FALSE
cg14884203	chr1	100352652	100352651	rs11166440:100808363:A:G	100342807	100342807	0	4.21034e-14	0.0856931	0.0102634	FALSE
cg00934037	chr1	100424117	100424116	rs56331099:101792769:G:A	101327213	101327213	0	4.14448e-07	-0.245327	0.0463252	TRUE
cg22600584	chr1	100628959	100628958	rs12568236:101117890:A:C	100652334	100652334	0	1.12761e-08	0.136473	0.0225718	TRUE
cg00063077	chr1	100895097	100895096	rs12740435:101357822:C:A	100892266	100892266	0	5.29772e-11	0.21587	0.0305075	FALSE
cg16556008	chr1	100895108	100895107	rs12740435:101357822:C:A	100892266	100892266	0	7.53945e-29	0.279164	0.0200303	FALSE
cg15686842	chr1	100895114	100895113	rs12740435:101357822:C:A	100892266	100892266	0	5.87051e-24	0.198684	0.0164153	FALSE
cg02492770	chr1	101201668	101201667	rs12407211:101675844:C:A	101210288	101210288	0	1.66365e-16	0.487811	0.0525038	FALSE
cg20859560	chr1	101323310	101323309	rs11164174:101821850:A:C	101356294	101356294	0	7.39346e-07	-0.160503	0.0310496	FALSE
cg04998153	chr1	101357776	101357775	rs10572382:101782733:CTTTTT:C	101317177	101317182	0	1.84669e-08	-0.37683	0.0633669	TRUE
cg21763415	chr1	101365091	101365090	rs9433790:101795325:C:T	101329769	101329769	0	3.03756e-22	0.538077	0.0469399	FALSE
cg00040744	chr1	101376365	101376364	rs9433783:101782990:C:T	101317434	101317434	0	9.01113e-11	-0.132737	0.0190238	FALSE
cg05160169	chr1	101770083	101770082	rs11164296	101770566	101770566	0	2.29707e-15	-0.407815	0.0460916	FALSE
cg01394944	chr1	104072988	104072987	rs11185368:104598622:T:A	104056000	104056000	0	8.53652e-08	-0.388084	0.0689065	FALSE
cg07188009	chr1	106083825	106083824	rs140075689:106247248:C:T	105704626	105704626	0	5.47969e-08	0.461167	0.0805643	TRUE
cg12137974	chr1	107055605	107055604	rs5776878:107551018:CA:C	107008396	107008397	0	1.12799e-06	0.159958	0.0315148	TRUE
cg14828511	chr1	107056504	107056503	rs12406721:107563243:G:T	107020621	107020621	0	5.3202e-15	0.232249	0.0266804	TRUE
cg09367891	chr1	107056625	107056624	rs72442711:107570761:TCTC:T	107028139	107028142	0	5.46341e-10	0.0862605	0.0129953	FALSE
cg02934600	chr1	107057755	107057754	rs61798463:107565934:G:A	107023312	107023312	0	2.15974e-21	0.330465	0.0296536	FALSE
cg15468180	chr1	107057788	107057787	rs72442711:107570761:TCTC:T	107028139	107028142	0	4.81929e-30	0.420726	0.02924	FALSE
cg25136326	chr1	107058058	107058057	rs61798463:107565934:G:A	107023312	107023312	0	5.30578e-15	0.24404	0.0280333	FALSE
cg07133347	chr1	107058141	107058140	rs72442711:107570761:TCTC:T	107028139	107028142	0	3.28487e-09	0.138155	0.0219614	TRUE
cg24343913	chr1	107394560	107394559	rs5776887:107951247:A:AT	107408625	107408625	0	4.61542e-07	-0.130204	0.0246955	TRUE
cg14015008	chr1	107516270	107516269	rs7548205:107488402:T:C	106945780	106945780	0	3.86517e-07	-0.214679	0.0404225	TRUE
cg01959838	chr1	107750292	107750291	rs11185171:108268985:T:C	107726363	107726363	0	4.65394e-07	0.157075	0.0298024	FALSE
cg04659311	chr1	107776699	107776698	rs79814083:107846958:T:G	107304336	107304336	0	6.49327e-07	-0.375229	0.0721902	TRUE
cg07750604	chr1	108113543	108113542	rs76976196:108657908:AT:A	108115286	108115287	0	1.66071e-09	0.184618	0.0287392	TRUE
cg06207961	chr1	108118609	108118608	rs1777448:108661274:C:T	108118652	108118652	0	2.81772e-14	0.18705	0.0222182	FALSE
cg18180276	chr1	108121320	108121319	rs2996918:108621812:A:G	108079190	108079190	0	9.08034e-12	0.276361	0.0373516	FALSE
cg08155972	chr1	108121503	108121502	rs2996918:108621812:A:G	108079190	108079190	0	2.94173e-08	0.180641	0.0308676	FALSE
cg06828260	chr1	108190943	108190942	rs12118280:108738780:T:C	108196158	108196158	0	2.57693e-08	-0.289594	0.049258	TRUE
cg05918124	chr1	108193092	108193091	rs61799377:108741774:T:A	108199152	108199152	0	6.12444e-18	-0.457439	0.0464831	TRUE
cg24323958	chr1	108199263	108199262	rs72693452:108740482:G:A	108197860	108197860	0	2.62617e-12	-0.311404	0.0408536	FALSE
cg04773602	chr1	108199611	108199610	rs663481:108743178:C:G	108200556	108200556	0	2.40582e-08	0.151805	0.0257596	TRUE
cg15496551	chr1	108201051	108201050	rs11584987:108743514:C:G	108200892	108200892	0	7.41849e-07	0.161739	0.0312933	TRUE
cg16315020	chr1	108816554	108816553	rs6696787:109358958:T:C	108816336	108816336	0	6.52947e-10	-0.122808	0.0185967	FALSE
cg22161131	chr1	108877657	108877656	rs11102642:109457151:C:T	108914529	108914529	0	2.60285e-15	-0.279375	0.0316511	FALSE
cg03461243	chr1	108943555	108943554	rs34619390:109494795:A:AT	108952173	108952173	0	2.99653e-07	0.112198	0.0209098	TRUE
cg27473416	chr1	180953781	180953780	rs141789904:180901510:T:TA	180932374	180932374	0	1.39212e-06	-0.248905	0.0494978	TRUE
cg22776392	chr1	180954434	180954433	rs76014269:180923595:G:A	180954459	180954459	0	1.36672e-09	0.505744	0.0782687	FALSE
cg06128826	chr1	180977631	180977630	rs1044595:180943529:C:T	180974393	180974393	0	2.60265e-07	0.115181	0.0213452	TRUE
cg16125762	chr1	181022979	181022978	rs114405188:180726764:C:T	180757628	180757628	0	4.7831e-07	0.377572	0.0717189	TRUE
cg11701819	chr1	181073708	181073707	rs2332058:181046911:T:C	181077775	181077775	0	1.54989e-13	0.280677	0.0345543	FALSE
cg19853902	chr1	181073765	181073764	rs4652557:181049375:C:G	181080239	181080239	0	4.25941e-13	0.237636	0.0299085	TRUE
cg22856976	chr1	181078446	181078445	rs76448591:181047438:T:C	181078302	181078302	0	8.87374e-16	0.247955	0.0275227	TRUE
cg06117891	chr1	181232744	181232743	rs10797696:181192739:C:G	181223603	181223603	0	6.91706e-09	-0.138752	0.0225842	TRUE
cg11824956	chr1	181317708	181317707	rs147877687:181239204:G:A	181270068	181270068	0	9.34222e-12	-0.211201	0.0285648	FALSE
cg15534876	chr1	181345460	181345459	rs144442149:182306703:G:C	182337568	182337568	0	1.61057e-06	0.259315	0.0519061	TRUE
cg11640200	chr1	181423697	181423696	rs2877606:181401494:T:C	181432358	181432358	0	5.36116e-12	-0.162988	0.0217486	FALSE
cg05665882	chr1	181460849	181460848	rs602009:181874667:A:G	181905532	181905532	0	2.63648e-07	-0.624003	0.115699	TRUE
cg22359828	chr1	181545081	181545080	rs67935857:181504841:C:T	181535705	181535705	0	8.41635e-08	-0.109271	0.0193914	TRUE
cg18761813	chr1	181675407	181675406	rs3766981:181644445:C:T	181675309	181675309	0	1.89579e-13	0.154573	0.0191125	FALSE
cg06869292	chr1	182069289	182069288	rs114863511:182031965:T:C	182062830	182062830	0	2.34677e-31	0.728008	0.0488995	FALSE
cg22100363	chr1	182069299	182069298	rs114863511:182031965:T:C	182062830	182062830	0	9.37325e-44	1.5004	0.0756735	FALSE
cg20955417	chr1	182085270	182085269	rs10911013:182051119:C:T	182081984	182081984	0	1.26881e-27	-0.339056	0.0251609	FALSE
cg12040931	chr1	182262618	182262617	rs77327293:182240244:C:T	182271109	182271109	0	1.84535e-11	-0.482094	0.0663142	TRUE
cg26135716	chr1	182391768	182391767	rs6424854:182371323:T:C	182402188	182402188	0	3.94933e-19	0.284676	0.0276572	FALSE
cg17999527	chr1	182391785	182391784	rs912902:182360930:A:G	182391795	182391795	0	2.66448e-14	0.143473	0.0170226	FALSE
cg02349066	chr1	182588412	182588411	rs610367:182571003:C:T	182601868	182601868	0	1.59429e-17	0.448772	0.0463496	FALSE
cg27563952	chr1	182588848	182588847	rs610367:182571003:C:T	182601868	182601868	0	3.87182e-24	0.597107	0.0490593	FALSE
cg20229934	chr1	182589182	182589181	rs620070:182556330:T:C	182587195	182587195	0	6.60911e-14	0.259149	0.0313315	FALSE
cg05616021	chr1	182589234	182589233	rs610367:182571003:C:T	182601868	182601868	0	9.63737e-18	0.37299	0.0381933	FALSE
cg10740215	chr1	182589254	182589253	rs7534480:182559353:C:T	182590218	182590218	0	1.9271e-18	-0.411939	0.0410622	FALSE
cg10931420	chr1	182589273	182589272	rs610367:182571003:C:T	182601868	182601868	0	2.12954e-24	0.465762	0.0379652	FALSE
cg00837947	chr1	182589414	182589413	rs610367:182571003:C:T	182601868	182601868	0	3.42275e-19	0.33869	0.0328299	FALSE
cg19841283	chr1	182589636	182589635	rs610367:182571003:C:T	182601868	182601868	0	1.65303e-25	0.649373	0.0512003	FALSE
cg02025632	chr1	182589721	182589720	rs610367:182571003:C:T	182601868	182601868	0	4.16276e-15	0.206993	0.0236652	FALSE
cg08156924	chr1	182589741	182589740	rs610367:182571003:C:T	182601868	182601868	0	8.71287e-21	0.299079	0.0273958	FALSE
cg04472447	chr1	182962826	182962825	rs10797796:182942152:G:A	182973017	182973017	0	1.04032e-19	0.413088	0.0392976	FALSE
cg15522984	chr1	183022549	183022548	rs9943067:182975102:C:T	183005967	183005967	0	6.48199e-10	0.140946	0.0213388	TRUE
cg07928641	chr1	183022713	183022712	rs141363957:182989615:CTTTTCT:C	183020480	183020486	0	1.31801e-17	0.199485	0.020536	FALSE
cg06495060	chr1	183024229	183024228	rs34679748:182988321:TA:T	183019186	183019187	0	3.70867e-07	-0.134389	0.025262	TRUE
cg12689670	chr1	183040213	183040212	rs35853177:183024123:CT:C	183054988	183054989	0	6.47456e-15	0.163494	0.0188546	TRUE
cg12552165	chr1	183185847	183185846	rs61333702:183138653:AT:A	183169518	183169519	0	4.47714e-09	-0.116526	0.0187043	TRUE
cg01949993	chr1	183185982	183185981	rs34551793:183024608:TA:T	183055473	183055474	0	5.54025e-09	-0.105971	0.0171258	TRUE
cg02767663	chr1	183198584	183198583	rs571158:183171361:A:C	183202226	183202226	0	8.80896e-13	-0.174699	0.0223485	TRUE
cg01417625	chr1	183218299	183218298	rs563015:183215236:T:C	183246101	183246101	0	5.71134e-13	0.246786	0.0312637	FALSE
cg06748143	chr1	183418505	183418504	rs35164473:183342754:CT:C	183373619	183373620	0	7.83175e-14	0.485649	0.0589256	TRUE
cg10202457	chr1	183418617	183418616	rs9425595:183369036:C:T	183399901	183399901	0	3.75274e-14	0.208633	0.0249284	TRUE
cg18116641	chr1	183420031	183420030	1:183310658:CAA:C	183341523	183341525	0	2.96296e-07	0.0959502	0.0178736	TRUE
cg09173681	chr1	183580560	183580559	rs12122217:183545665:C:T	183576530	183576530	0	4.97046e-26	0.878944	0.0682504	FALSE
cg25008509	chr1	183593559	183593558	rs374167209:183585962:C:T	183616827	183616827	0	7.69489e-08	0.0851052	0.015053	TRUE
cg04041654	chr1	183610336	183610335	rs1174670:183632435:C:T	183663300	183663300	0	2.51392e-23	0.258779	0.0218055	TRUE
cg08554947	chr1	183633974	183633973	rs17488675:183592570:C:T	183623435	183623435	0	1.78337e-10	-0.229644	0.033526	FALSE
cg19767650	chr1	183636047	183636046	rs10911386:183612828:C:T	183643693	183643693	0	3.99133e-18	0.315054	0.0317857	FALSE
cg24679106	chr1	183636117	183636116	1:183641073:C:CT	183671938	183671938	0	2.00219e-15	0.235924	0.0265941	TRUE
cg19108372	chr1	183636133	183636132	rs10453828:183716070:G:C	183746935	183746935	0	4.6567e-08	0.135585	0.0235478	FALSE
cg18856995	chr1	183698249	183698248	rs11581495:183750649:C:T	183781514	183781514	0	2.12804e-07	-0.389169	0.0715493	TRUE
cg16788860	chr1	183871952	183871951	exm-rs4651156	183867898	183867898	0	2.44929e-07	-0.151694	0.0280441	FALSE
cg17634520	chr1	183916223	183916222	rs79411014:183854703:A:G	183885569	183885569	0	6.45787e-07	0.319127	0.0613827	TRUE
cg01544890	chr1	183989409	183989408	exm2259885	184010114	184010114	0	2.96005e-12	-0.156627	0.0206061	FALSE
cg04200073	chr1	184037984	184037983	rs114661926:184006549:C:G	184037415	184037415	0	1.34352e-06	-0.117837	0.0233963	TRUE
cg02380535	chr1	184633893	184633892	rs7540093	184633964	184633964	0	3.63499e-08	0.186606	0.0321248	FALSE
cg21632224	chr1	184843938	184843937	rs591890:184824457:C:T	184855323	184855323	0	5.64149e-16	0.228959	0.0252002	FALSE
cg22000552	chr1	185366500	185366499	rs7512337:185335532:T:C	185366400	185366400	0	2.49458e-12	-0.189901	0.0248834	FALSE
cg22046043	chr1	185656911	185656910	rs74133224:185624612:G:T	185655480	185655480	0	1.78172e-06	-0.286877	0.0576859	FALSE
cg20315590	chr1	186033910	186033909	rs61829959:186003090:A:T	186033958	186033958	0	5.30745e-17	0.319962	0.0337439	FALSE
cg22571271	chr1	186722505	186722504	rs12407206:186757770:C:T	186788638	186788638	0	1.73805e-06	-0.123145	0.0247345	FALSE
cg25198029	chr1	186975565	186975564	rs10798078	186998570	186998570	0	5.52444e-29	-0.436263	0.0311883	FALSE
cg18132279	chr1	186977463	186977462	rs10798076:186944688:G:A	186975556	186975556	0	2.8146e-15	0.311032	0.0352909	FALSE
cg18691233	chr1	187092316	187092315	rs1924732:187071390:A:G	187102258	187102258	0	6.55376e-19	-0.568327	0.0556652	TRUE
cg03248088	chr1	187794738	187794737	rs2495405:187800996:A:T	187831865	187831865	0	3.71963e-07	0.117229	0.0220389	TRUE
cg13222036	chr1	187928499	187928498	rs35604685:187899548:GAA:G	187930417	187930419	0	1.74363e-13	-0.194015	0.023946	FALSE
cg03792111	chr1	189149834	189149833	rs4845186:189111912:T:C	189142781	189142781	0	5.6713e-11	-0.201065	0.0284659	FALSE
cg05749388	chr1	190144891	190144890	rs2990997:190119703:T:A	190150573	190150573	0	4.78832e-22	0.27849	0.0244522	FALSE
cg24622997	chr1	190373947	190373946	rs7545105:190365640:G:A	190396510	190396510	0	1.24074e-07	-0.186685	0.0336154	TRUE
cg06367647	chr1	190477700	190477699	rs12093056:190425826:G:A	190456696	190456696	0	5.02153e-12	0.252722	0.0336693	FALSE
cg24241726	chr1	190680468	190680467	rs11807712:190662425:G:C	190693295	190693295	0	2.47327e-08	0.167352	0.028425	TRUE
cg08469177	chr1	192453447	192453446	rs1892152:192416374:T:A	192447244	192447244	0	8.57553e-07	0.138678	0.0269985	TRUE
cg15041339	chr1	192517070	192517069	rs2146733:192502192:A:G	192533062	192533062	0	1.21909e-07	-0.150597	0.0270991	FALSE
cg13092082	chr1	192633391	192633390	rs6674661:192606617:A:C	192637487	192637487	0	1.78474e-09	0.151201	0.0235887	TRUE
cg09978023	chr1	192639459	192639458	rs4319308:192600491:T:C	192631361	192631361	0	2.46754e-07	0.153694	0.0284222	FALSE
cg08932474	chr1	192642163	192642162	rs6698108:192612851:T:G	192643721	192643721	0	1.44671e-06	-0.109599	0.0218325	FALSE
cg26227484	chr1	192808326	192808325	rs11305607:192765377:TA:T	192796247	192796248	0	7.14971e-25	-0.490335	0.0393995	TRUE
cg26913977	chr1	192808506	192808505	rs7549721:192771684:A:G	192802554	192802554	0	4.18799e-12	-0.584776	0.0775701	FALSE
cg05753482	chr1	192893518	192893517	rs36005848:192877943:G:T	192908813	192908813	0	1.74851e-08	0.195059	0.0327398	FALSE
cg12725760	chr1	192904783	192904782	rs200956781:192874351:C:CT	192905221	192905221	0	1.33488e-07	0.209806	0.0378838	FALSE
cg05576974	chr1	193059009	193059008	rs4657842:193028121:A:T	193058991	193058991	0	1.07149e-12	0.205798	0.0264445	FALSE
cg23627149	chr1	193186144	193186143	rs34268790:193057513:A:AT	193088383	193088383	0	3.20905e-10	-0.197639	0.029328	TRUE
cg08205993	chr1	193187113	193187112	rs142942063:193098617:A:AATTTATTTATTT	193129487	193129487	0	1.6024e-21	-0.552418	0.049355	TRUE
cg00905249	chr1	193303580	193303579	exm133014	193105381	193105381	0	7.03519e-16	-1.18265	0.130703	TRUE
cg04508951	chr1	193487011	193487010	rs79987731:193456138:T:C	193487008	193487008	0	1.8831e-10	-0.606371	0.0886571	FALSE
cg21054197	chr1	193730259	193730258	rs2031831:193694777:T:C	193725647	193725647	0	1.12184e-14	-0.339108	0.039536	FALSE
cg11230062	chr1	193732501	193732500	rs5779725:194230328:AT:A	194261198	194261199	0	4.97874e-16	1.47081	0.161509	TRUE
cg13360115	chr1	194103046	194103045	rs10801282:194004906:G:A	194035776	194035776	0	1.10161e-18	0.297937	0.029428	TRUE
cg24013909	chr1	29249194	29249193	rs139121461:29575675:C:CACAT	29249163	29249163	0	8.51617e-18	0.36528	0.0373254	TRUE
cg01115565	chr1	29257711	29257710	rs145141770:29583733:G:GAAGT	29257221	29257221	0	7.32698e-18	-0.255512	0.0260427	FALSE
cg27572007	chr1	29445025	29445024	rs12144024:29767522:C:T	29441010	29441010	0	1.02136e-07	-0.192742	0.0344523	FALSE
cg25160847	chr1	29449144	29449143	rs7552658:30852097:C:T	30379250	30379250	0	5.588e-11	-0.158924	0.022491	TRUE
cg10312476	chr1	29453757	29453756	rs7547385:29780038:G:C	29453526	29453526	0	2.84159e-20	0.391815	0.0365361	FALSE
cg01974817	chr1	29475741	29475740	rs1570818:29804613:A:C	29478101	29478101	0	1.93148e-10	0.227117	0.0332298	FALSE
cg07922345	chr1	29650024	29650023	rs143648679:29727993:C:T	29401481	29401481	0	1.14201e-06	-0.377805	0.0744755	TRUE
cg15656567	chr1	29672078	29672077	rs10915111:30143294:G:T	29670447	29670447	0	2.60912e-08	0.160661	0.0273392	FALSE
cg24806360	chr1	29825169	29825168	rs36085495:30298720:T:TCA	29825873	29825873	0	1.16041e-09	0.158918	0.0244742	TRUE
cg06493301	chr1	30006130	30006129	rs12032000:30485691:G:C	30012844	30012844	0	1.84405e-07	-0.179851	0.0328815	FALSE
cg10112249	chr1	30058199	30058198	rs11577620:30533441:G:T	30060594	30060594	0	1.24157e-07	-0.135697	0.0244348	FALSE
cg24084117	chr1	30101654	30101653	rs1694321:30570287:T:C	30097440	30097440	0	1.7465e-19	0.263299	0.0252519	FALSE
cg00931336	chr1	30414968	30414967	rs12034478:30886791:C:T	30413944	30413944	0	1.0537e-13	0.209974	0.0256375	FALSE
cg07679975	chr1	30471169	30471168	rs11582232:30943682:A:G	30470835	30470835	0	2.75631e-09	-0.152606	0.0241267	TRUE
cg07482917	chr1	30472072	30472071	rs1531923:30944867:T:C	30472020	30472020	0	4.90829e-08	-0.0966406	0.0168159	FALSE
cg17484671	chr1	30685312	30685311	rs522322:31118731:A:G	30645884	30645884	0	1.13328e-06	-0.343856	0.0677603	TRUE
cg12700145	chr1	30685354	30685353	rs1211456:31160359:T:C	30687512	30687512	0	5.73591e-17	-0.243194	0.0256829	FALSE
cg16107724	chr1	30685453	30685452	rs1188428:31139591:T:A	30666744	30666744	0	5.68912e-09	-0.440232	0.0712058	FALSE
cg21517016	chr1	30689840	30689839	rs34881668:31142712:GA:G	30669865	30669866	0	9.80452e-11	-0.126031	0.0181036	TRUE
cg00760904	chr1	30692003	30692002	rs138816952:31157078:AGTTAGTTTGTTT:A	30684231	30684243	0	3.03954e-09	0.23359	0.0370423	TRUE
cg16925659	chr1	30719305	30719304	rs4949290:31203860:G:A	30731013	30731013	0	6.13998e-18	0.302801	0.0307707	FALSE
cg01809819	chr1	30719319	30719318	rs12757994:31183435:G:T	30710588	30710588	0	6.37958e-09	0.213961	0.0347349	FALSE
cg06825886	chr1	30775698	30775697	rs4147103:31255905:T:C	30783058	30783058	0	4.50067e-07	0.125195	0.0237208	FALSE
cg25303761	chr1	30783182	30783181	rs728603:31246810:C:T	30773963	30773963	0	3.54958e-32	-1.26043	0.0829149	FALSE
cg16831933	chr1	30783404	30783403	rs728603:31246810:C:T	30773963	30773963	0	4.52527e-17	-0.270595	0.0284577	FALSE
cg08693658	chr1	30824094	30824093	rs10914216:31301797:G:A	30828950	30828950	0	6.81126e-13	0.163989	0.0208569	FALSE
cg08372168	chr1	30824233	30824232	rs3862889:31291348:A:G	30818501	30818501	0	2.49536e-21	0.276979	0.0249066	FALSE
cg13134475	chr1	30824252	30824251	rs4012688:31294939:C:CCCT	30822092	30822092	0	1.03839e-34	0.702955	0.0434464	TRUE
cg13854500	chr1	30824459	30824458	rs3862889:31291348:A:G	30818501	30818501	0	1.42266e-29	0.788173	0.0554635	FALSE
cg14585532	chr1	30824514	30824513	rs2377570:31298769:A:G	30825922	30825922	0	6.64099e-28	0.631472	0.0464961	FALSE
cg01299259	chr1	30824524	30824523	rs2377570:31298769:A:G	30825922	30825922	0	1.3759e-25	0.449311	0.0353432	FALSE
cg24996263	chr1	30824598	30824597	rs3862889:31291348:A:G	30818501	30818501	0	4.61161e-28	0.632956	0.0464018	FALSE
cg15367245	chr1	31240083	31240082	rs10798841:31755501:G:A	31282654	31282654	0	5.47713e-16	-0.244994	0.0269503	FALSE
cg20858149	chr1	31240087	31240086	rs12135961:31755330:G:C	31282483	31282483	0	3.45869e-10	-0.156339	0.0232484	TRUE
cg20249402	chr1	31240138	31240137	rs10798841:31755501:G:A	31282654	31282654	0	6.22764e-14	-0.283089	0.0341831	FALSE
cg07221201	chr1	31240357	31240356	rs12135961:31755330:G:C	31282483	31282483	0	1.05935e-14	-0.205343	0.0239132	TRUE
cg26923035	chr1	31256071	31256070	rs7535291:31763496:G:A	31290649	31290649	0	1.83143e-10	-0.209	0.0305345	FALSE
cg07345934	chr1	31373097	31373096	rs12121101:31725392:G:A	31252545	31252545	0	1.28071e-07	-0.152523	0.027497	TRUE
cg20318096	chr1	31373264	31373263	rs5773350:31777119:C:CT	31304272	31304272	0	5.69692e-07	-0.154048	0.0294747	TRUE
cg24539573	chr1	31373696	31373695	rs12404861:31861271:G:A	31388424	31388424	0	1.79189e-07	-0.10774	0.0196757	TRUE
cg24947847	chr1	31413643	31413642	rs111456525:31893379:G:GTTGT	31420532	31420532	0	4.40863e-11	0.395856	0.0556766	TRUE
cg24123738	chr1	31413646	31413645	rs11589125:31894396:C:T	31421549	31421549	0	1.55995e-11	0.95314	0.130558	FALSE
cg17570569	chr1	31563236	31563235	rs10157800:32028770:A:G	31563169	31563169	0	1.85721e-07	-0.123518	0.0225886	TRUE
cg15518761	chr1	31580146	31580145	rs12744206:31894974:C:T	31422127	31422127	0	9.84668e-07	0.539205	0.105605	FALSE
cg02644386	chr1	31594104	31594103	rs7518151:32061851:T:C	31596250	31596250	0	2.03985e-17	-0.275785	0.0286043	FALSE
cg19156395	chr1	31645272	31645271	rs75145224:32128140:T:C	31662539	31662539	0	1.08204e-07	0.302098	0.0541165	FALSE
cg13919466	chr1	31669898	31669897	rs4949448:32062066:G:T	31596465	31596465	0	2.67942e-07	-0.0973839	0.0180679	FALSE
cg14074118	chr1	31681930	31681929	rs11310373:32147615:AC:A	31682014	31682015	0	1.45624e-08	-0.135502	0.0226033	TRUE
cg27650656	chr1	31707819	31707818	rs1127100:32193647:T:C	31728046	31728046	0	2.0912e-07	0.108539	0.0199415	TRUE
cg24691844	chr1	31788995	31788994	rs144779055:32894885:A:G	32429284	32429284	0	1.17784e-06	0.625806	0.123531	TRUE
cg07802625	chr1	31816065	31816064	rs147745595:32289120:C:CA	31823519	31823519	0	7.2119e-10	-0.144365	0.0219243	FALSE
cg17803965	chr1	31816212	31816211	rs10914486:32302791:G:T	31837190	31837190	0	2.86608e-08	-0.210636	0.0359605	FALSE
cg17798347	chr1	32205493	32205492	rs7521501:32705193:G:C	32239592	32239592	0	6.1383e-07	0.158398	0.0304021	FALSE
cg03741348	chr1	32246637	32246636	rs11419057:33124151:C:CT	32658550	32658550	0	5.76924e-08	-0.270207	0.0472923	TRUE
cg12064008	chr1	32362130	32362129	rs2273376:32832292:A:G	32366691	32366691	0	8.73952e-07	0.539524	0.105123	TRUE
cg21172540	chr1	32362240	32362239	rs10914565:32958395:T:G	32492794	32492794	0	2.31786e-07	0.289275	0.0533627	TRUE
cg21324883	chr1	32650598	32650597	exm41165	32770188	32770188	0	2.16562e-07	0.360937	0.0664044	TRUE
cg13641837	chr1	32650956	32650955	rs12407521:33129559:G:A	32663958	32663958	0	1.64958e-20	-0.336451	0.0311158	FALSE
cg17339202	chr1	32695300	32695299	rs3844243:33082610:C:T	32617009	32617009	0	1.33872e-11	0.345088	0.0470892	FALSE
cg07191012	chr1	32716772	32716771	rs786459:33174244:G:A	32708643	32708643	0	2.72471e-11	-0.227275	0.0315726	FALSE
cg13991616	chr1	32717010	32717009	rs786459:33174244:G:A	32708643	32708643	0	6.28379e-08	-0.112919	0.0198248	FALSE
cg15212364	chr1	32736652	32736651	rs12042945:33213753:G:A	32748152	32748152	0	1.12052e-06	0.134248	0.0264419	FALSE
cg16007395	chr1	32765470	32765469	rs35154516:33396689:C:CA	32931088	32931088	0	3.2666e-07	-0.135782	0.025393	TRUE
cg17327404	chr1	32765509	32765508	rs34595471:33290399:C:CT	32824798	32824798	0	1.62743e-06	-0.120157	0.0240626	TRUE
cg26787521	chr1	32798901	32798900	rs6702519:33231403:G:T	32765802	32765802	0	4.72761e-10	-0.166752	0.0250176	FALSE
cg05660436	chr1	32893357	32893356	rs77242526:33344356:AG:A	32878755	32878756	0	7.68581e-07	-0.488684	0.0946938	TRUE
cg22166728	chr1	32924924	32924923	rs9425965:33382661:C:T	32917060	32917060	0	4.07982e-18	0.306929	0.0309773	FALSE
cg26266099	chr1	32926038	32926037	rs194670:33440699:C:T	32975098	32975098	0	1.07335e-18	0.425873	0.0420469	TRUE
cg14806693	chr1	32940242	32940241	rs171837:33404367:C:T	32938766	32938766	0	1.51167e-20	0.486279	0.0449132	FALSE
cg20340029	chr1	32949623	32949622	rs367613864:33421349:CA:C	32955748	32955749	0	6.94191e-07	0.14367	0.0277189	TRUE
cg00843917	chr1	32949647	32949646	rs194644	32943950	32943950	0	3.19116e-11	0.212253	0.0296052	FALSE
cg12919773	chr1	32959574	32959573	rs67835920:33366074:GGCCTCCCAGAGTGCT:G	32900473	32900488	0	9.6781e-09	0.204484	0.03365	TRUE
cg10120255	chr1	32961140	32961139	rs35049190:33420339:C:CA	32954738	32954738	0	7.04624e-13	0.233106	0.0296702	TRUE
cg04906435	chr1	32961207	32961206	rs171837:33404367:C:T	32938766	32938766	0	1.66193e-08	0.21086	0.0353312	FALSE
cg26406441	chr1	32961541	32961540	rs200136829:33401363:C:CT	32935762	32935762	0	2.12773e-07	-0.303231	0.0557491	TRUE
cg13690407	chr1	33007578	33007577	rs10914645:33489615:C:T	33024014	33024014	0	1.17867e-07	0.127667	0.0229437	FALSE
cg13488944	chr1	33045390	33045389	rs10914655:33526343:C:G	33060742	33060742	0	3.96585e-11	-0.125185	0.0175589	FALSE
cg04306220	chr1	33053635	33053634	rs71909186:33489002:TACA:T	33023401	33023404	0	6.6184e-29	0.668359	0.0478821	TRUE
cg02350320	chr1	33080551	33080550	rs12045975:33571731:A:C	33106130	33106130	0	1.69185e-16	-0.19034	0.0204928	FALSE
cg12731430	chr1	33080817	33080816	rs11448013:33542433:A:AT	33076832	33076832	0	5.54866e-18	-0.235182	0.0238586	FALSE
cg03177171	chr1	33082203	33082202	rs11448013:33542433:A:AT	33076832	33076832	0	1.98306e-11	-0.146987	0.0202553	TRUE
cg24398176	chr1	33082215	33082214	rs12732425:33541113:G:A	33075512	33075512	0	1.0729e-10	-0.12621	0.0181731	TRUE
cg11136886	chr1	33143909	33143908	rs4652979:34474209:G:A	34008608	34008608	0	1.13149e-06	0.212964	0.0419639	TRUE
cg01676680	chr1	33179171	33179170	rs72656240:33635384:A:G	33169783	33169783	0	3.79053e-07	0.116131	0.0218493	TRUE
cg23277061	chr1	33268788	33268787	rs148348297:33720329:CTCCCTT:C	33254728	33254734	0	7.44477e-10	-0.115092	0.0174948	TRUE
cg18238718	chr1	33276769	33276768	rs1570685:33913346:G:A	33447745	33447745	0	1.78391e-07	0.0712979	0.0130183	TRUE
cg13870102	chr1	33306919	33306918	rs11554674:33790496:G:A	33324895	33324895	0	9.18192e-23	0.237779	0.0203972	FALSE
cg00069002	chr1	33307136	33307135	rs10914681:33776154:C:T	33310553	33310553	0	7.08484e-13	0.132964	0.016926	FALSE
cg03331207	chr1	33318137	33318136	exm2251422	33330480	33330480	0	1.14372e-10	0.139311	0.0200941	FALSE
cg16987567	chr1	33324774	33324773	rs114013172:33916233:A:G	33450632	33450632	0	6.95364e-07	-0.0711985	0.0137377	TRUE
cg07461987	chr1	33355750	33355749	rs1123295:33910453:A:G	33444852	33444852	0	1.92855e-09	0.624098	0.0975939	TRUE
cg07461987	chr1	33355750	33355749	rs10157574:33871072:G:A	33405471	33405471	1	1.08491e-06	-1.0654	0.209547	TRUE
cg15586632	chr1	33376322	33376321	rs11422037:33838721:C:CT	33373120	33373120	0	1.37656e-17	-0.276522	0.0284878	TRUE
cg21578869	chr1	33376331	33376330	rs4233199	33353961	33353961	0	6.64905e-16	-0.166334	0.0183635	FALSE
cg26227027	chr1	33379286	33379285	rs12025675:33912754:G:A	33447153	33447153	0	2.59758e-07	-0.0843178	0.0156245	FALSE
cg17329292	chr1	33430290	33430289	rs79505176:33626833:G:A	33161232	33161232	0	1.03443e-09	-0.312294	0.0479315	FALSE
cg25334541	chr1	33442401	33442400	rs10914687:33813755:C:T	33348154	33348154	0	4.996e-13	-0.285453	0.0360543	FALSE
cg17501574	chr1	33444202	33444201	rs1130800:33789968:G:T	33324367	33324367	0	2.61184e-14	0.2064	0.0244785	FALSE
cg09805902	chr1	33534896	33534895	rs923879	33534209	33534209	0	7.91561e-20	0.279876	0.0265121	TRUE
cg11401957	chr1	33709570	33709569	rs6668431:33796879:G:A	33331278	33331278	0	4.52526e-07	-0.355156	0.0673068	TRUE
cg10732601	chr1	33880498	33880497	rs10914802	33879648	33879648	0	1.0757e-14	0.191482	0.0223058	FALSE
cg00305071	chr1	34038417	34038416	rs2625684	34039514	34039514	0	1.0619e-06	-0.0909517	0.0178719	TRUE
cg25452854	chr1	217137893	217137892	rs11117777:217325016:T:C	217151674	217151674	0	3.83079e-09	0.127702	0.0203977	TRUE
cg22512068	chr1	217542545	217542544	rs10495060	217553875	217553875	0	9.51906e-08	0.162416	0.0289551	FALSE
cg08096008	chr1	217614520	217614519	rs17046650:217788061:T:A	217614719	217614719	0	8.73336e-27	0.30516	0.0231865	TRUE
cg17741814	chr1	217631176	217631175	rs111540767:217098144:A:C	216924802	216924802	0	6.27433e-08	0.389687	0.0684123	TRUE
cg13615839	chr1	217921612	217921611	rs35973312:218097854:T:C	217924512	217924512	0	9.53631e-17	-0.186211	0.0198431	TRUE
cg24410255	chr1	217925252	217925251	rs6660339:218099076:G:A	217925734	217925734	0	3.57754e-08	0.127945	0.0220137	FALSE
cg21693060	chr1	218031362	218031361	rs5781012:218200934:C:CTAAA	218027592	218027592	0	2.08734e-20	-0.332801	0.030888	TRUE
cg07763320	chr1	218042180	218042179	rs6700287:218208901:C:T	218035559	218035559	0	1.4248e-17	0.244377	0.0251909	TRUE
cg16193928	chr1	218156639	218156638	rs586622:218314539:C:G	218141197	218141197	0	8.39731e-09	0.684643	0.112142	FALSE
cg16193928	chr1	218156639	218156638	exm2260003	218160259	218160259	1	1.59477e-07	-0.634106	0.115281	FALSE
cg14378539	chr1	218524670	218524669	rs2964991:218685232:C:T	218511890	218511890	0	1.9235e-27	-0.388753	0.0289949	TRUE
cg09629734	chr1	218669587	218669586	rs4558049:218838876:C:T	218665534	218665534	0	2.66953e-08	-0.336029	0.0572263	FALSE
cg11774116	chr1	218671819	218671818	rs4558049:218838876:C:T	218665534	218665534	0	3.36372e-15	-0.184919	0.0210541	FALSE
cg00514003	chr1	218674493	218674492	rs145750618:218823061:A:G	218649719	218649719	0	3.31518e-18	0.219101	0.0220368	FALSE
cg11598600	chr1	219220963	219220962	rs4846298:219584090:G:A	219410748	219410748	0	1.06815e-12	0.206754	0.0265654	TRUE
cg13547337	chr1	219665761	219665760	rs71767721:219841036:CCAGA:C	219667694	219667698	0	1.44635e-18	-0.203385	0.0201783	TRUE
cg16330477	chr1	219747552	219747551	rs4846578:219897709:A:T	219724367	219724367	0	2.12899e-10	0.170774	0.0250534	TRUE
cg07216884	chr1	219791114	219791113	1:219964469:A:ATTTTTTTTTT	219791127	219791127	0	6.6843e-16	0.172426	0.0190379	FALSE
cg20123108	chr1	219794645	219794644	rs34686274:219960124:T:TA	219786782	219786782	0	5.08866e-11	0.189055	0.0266899	TRUE
cg07982099	chr1	219991788	219991787	rs1768668:220163278:A:G	219989936	219989936	0	5.29352e-07	-0.164571	0.0313917	FALSE
cg17009631	chr1	220089676	220089675	rs140861606:220283480:T:TC	220110138	220110138	0	2.50144e-07	0.184028	0.0340502	TRUE
cg22547711	chr1	220400986	220400985	rs1361257:220548136:G:A	220374794	220374794	0	5.85476e-10	-0.122032	0.018421	FALSE
cg19720265	chr1	220527542	220527541	rs12123146:220624476:T:C	220451134	220451134	0	2.87073e-08	-0.141744	0.0242004	TRUE
cg06786860	chr1	220703055	220703054	rs35613432:220873981:TC:T	220700639	220700640	0	5.74588e-11	-0.18055	0.0255703	FALSE
cg07185695	chr1	220786245	220786244	rs6541159:220949178:T:C	220775836	220775836	0	3.26495e-08	-0.26783	0.0459336	FALSE
cg11245333	chr1	220786590	220786589	rs11118598:220941444:G:A	220768102	220768102	0	1.71599e-10	-0.275971	0.0402468	FALSE
cg01219672	chr1	220786745	220786744	rs12074049:220909579:G:A	220736237	220736237	0	7.16969e-10	-0.504357	0.076582	TRUE
cg26018382	chr1	220810452	220810451	rs11118607	220811022	220811022	0	3.21928e-08	0.151774	0.0260169	FALSE
cg06291348	chr1	220810512	220810511	rs150293444:221109293:AACC:A	220935951	220935954	0	4.77979e-09	0.185465	0.029832	TRUE
cg10386298	chr1	220877150	220877149	rs6541161:220994264:T:A	220820922	220820922	0	5.311e-09	-0.220459	0.03558	FALSE
cg24604749	chr1	220880500	220880499	rs78116009:221088756:A:T	220915414	220915414	0	4.78255e-08	0.205065	0.035649	FALSE
cg21282663	chr1	220880563	220880562	rs11118618:221011546:C:T	220838204	220838204	0	2.2368e-07	0.129865	0.0239227	FALSE
cg22698272	chr1	220881274	220881273	rs11118617:221009507:T:C	220836165	220836165	0	1.78744e-07	0.278797	0.0509096	FALSE
cg07179669	chr1	220881366	220881365	rs2807845:220996287:G:T	220822945	220822945	0	1.67066e-10	-0.255696	0.0372627	FALSE
cg12479878	chr1	220881484	220881483	rs2807845:220996287:G:T	220822945	220822945	0	2.90889e-09	-0.241575	0.0382564	FALSE
cg19306970	chr1	220881756	220881755	rs11118610:220990086:A:C	220816744	220816744	0	2.24836e-11	-0.248095	0.034297	FALSE
cg02455346	chr1	220882060	220882059	rs11118617:221009507:T:C	220836165	220836165	0	1.24837e-09	0.394586	0.0609008	FALSE
cg07584855	chr1	220882204	220882203	rs2807845:220996287:G:T	220822945	220822945	0	9.80415e-10	-0.203501	0.0311843	FALSE
cg04436994	chr1	220882324	220882323	rs4143772	220815004	220815004	0	3.90699e-14	-0.232472	0.0278	FALSE
cg14166284	chr1	220882378	220882377	rs7514450:220991171:C:T	220817829	220817829	0	1.81079e-12	0.240151	0.0312335	FALSE
cg09255910	chr1	220882449	220882448	rs4143772	220815004	220815004	0	8.11426e-13	-0.206253	0.0263361	FALSE
cg17852326	chr1	220882623	220882622	rs11118608:220987469:C:G	220814127	220814127	0	1.29103e-11	0.308833	0.0421041	TRUE
cg15450098	chr1	220884220	220884219	rs4143772	220815004	220815004	0	2.95495e-14	-0.818792	0.0973528	FALSE
cg15450098	chr1	220884220	220884219	rs2738751:221051713:C:G	220878371	220878371	1	2.35522e-07	0.78412	0.144738	TRUE
cg26440142	chr1	220884232	220884231	rs11118609:220988490:A:G	220815148	220815148	0	8.125e-11	-0.208532	0.0298046	FALSE
cg12053004	chr1	220884410	220884409	rs7514450:220991171:C:T	220817829	220817829	0	2.95179e-14	0.257496	0.0306151	FALSE
cg10975889	chr1	220884467	220884466	rs7514450:220991171:C:T	220817829	220817829	0	4.15646e-17	0.265451	0.0278752	FALSE
cg08655206	chr1	220884857	220884856	rs4143772	220815004	220815004	0	2.16866e-16	-0.195869	0.0211831	FALSE
cg07903237	chr1	220891047	220891046	rs2807866:221080929:A:G	220907587	220907587	0	5.43261e-15	0.227741	0.0261732	FALSE
cg06225634	chr1	220893011	220893010	rs2807867:221082794:C:A	220909452	220909452	0	5.66612e-07	-0.135702	0.0259586	FALSE
cg14035969	chr1	220895082	220895081	rs12141189:221053545:T:C	220880203	220880203	0	4.31864e-11	-0.204828	0.0287933	FALSE
cg14315054	chr1	220895389	220895388	rs12141189:221053545:T:C	220880203	220880203	0	4.34275e-08	-0.137289	0.0237845	FALSE
cg04539515	chr1	220895453	220895452	rs2807867:221082794:C:A	220909452	220909452	0	1.04781e-07	-0.115801	0.020719	FALSE
cg07241917	chr1	220896358	220896357	rs2491255:221071242:T:G	220897900	220897900	0	5.56759e-12	-0.151496	0.0202336	TRUE
cg27291539	chr1	221169179	221169178	rs201838560:221343704:A:AT	221170362	221170362	0	6.25233e-15	-0.266994	0.0307692	TRUE
cg19208107	chr1	221284169	221284168	rs61819312:221457653:G:C	221284311	221284311	0	2.07389e-12	0.330643	0.0431386	FALSE
cg17990279	chr1	221335971	221335970	rs4304588:221476976:C:T	221303634	221303634	0	8.35946e-08	-0.118193	0.0209696	TRUE
cg17372922	chr1	221394471	221394470	rs140277847:221558729:C:G	221385387	221385387	0	3.06871e-08	0.307271	0.0525836	FALSE
cg07355757	chr1	221478406	221478405	rs12757436:221631938:G:A	221458596	221458596	0	1.14219e-10	0.153715	0.0221709	FALSE
cg04222084	chr1	221742309	221742308	rs4601596:221914458:C:T	221741116	221741116	0	4.08107e-08	-0.44986	0.0777631	FALSE
cg04680713	chr1	221878564	221878563	rs12137702:222055757:G:C	221882415	221882415	0	1.00821e-06	-0.170773	0.0334809	FALSE
cg19445579	chr1	221892324	221892323	rs7517045:222146669:A:G	221973327	221973327	0	1.39044e-07	0.111482	0.0201612	TRUE
cg10446396	chr1	222048249	222048248	rs56060561:222187717:A:ACT	222014375	222014375	0	1.09241e-07	-0.143521	0.025719	TRUE
cg00937131	chr1	222230709	222230708	rs158713:222403611:A:C	222230269	222230269	0	6.87532e-24	-0.369462	0.0305898	FALSE
cg14661425	chr1	222546840	222546839	rs71175170:222756768:G:GA	222583426	222583426	0	7.76195e-08	-0.147578	0.0261113	TRUE
cg27048098	chr1	222618297	222618296	rs77351792:222857326:A:C	222683984	222683984	0	1.04327e-12	0.482778	0.0619978	TRUE
cg20875553	chr1	222641668	222641667	rs3002131:222775657:G:C	222602315	222602315	0	6.02413e-07	-0.142422	0.0273142	TRUE
cg00089945	chr1	222643517	222643516	rs12063226:222927255:A:G	222753913	222753913	0	8.23771e-07	0.219229	0.0426071	TRUE
cg22661701	chr1	222661906	222661905	rs10495197:222793700:C:T	222620358	222620358	0	3.98506e-14	-0.51463	0.0615668	FALSE
cg13253887	chr1	222814157	222814156	rs66605104:222987528:CATT:C	222814186	222814189	0	1.78609e-26	1.03972	0.0797049	TRUE
cg21908664	chr1	222814245	222814244	rs4609435:222991691:A:G	222818349	222818349	0	6.66389e-16	-0.326589	0.0360573	FALSE
cg22352176	chr1	222814504	222814503	rs4609435:222991691:A:G	222818349	222818349	0	3.62966e-16	-0.340754	0.0372006	FALSE
cg02635260	chr1	222814776	222814775	rs10495203:223001349:C:T	222828007	222828007	0	4.13503e-15	-0.260102	0.0297331	FALSE
cg11882616	chr1	222814985	222814984	rs72004674:222989414:AATATATAT:A	222816072	222816080	0	6.66869e-13	0.218703	0.0278025	TRUE
cg15448366	chr1	223129708	223129707	rs851180:223306354:T:C	223133012	223133012	0	1.45733e-10	-0.146084	0.0212097	FALSE
cg04232325	chr1	223364022	223364021	rs1618537:223537385:A:G	223364043	223364043	0	9.61257e-09	0.321464	0.0528886	FALSE
cg17491146	chr1	223480045	223480044	rs10430272:223645256:T:C	223471914	223471914	0	1.87603e-11	-0.171638	0.0236194	FALSE
cg16343357	chr1	223715547	223715546	rs111258277:223881275:T:G	223693573	223693573	0	1.38514e-18	0.233134	0.0231134	FALSE
cg11145399	chr1	223846777	223846776	rs17598:223933079:C:T	223745377	223745377	0	1.85386e-07	-0.234552	0.0428911	FALSE
cg05141656	chr1	224213325	224213324	rs12565875:224425165:T:A	224237463	224237463	0	7.75197e-08	0.155996	0.0275993	TRUE
cg16000154	chr1	224356803	224356802	rs11322243:224648475:GT:G	224460773	224460774	0	7.73457e-09	-0.157873	0.0257898	TRUE
cg21058413	chr1	224358035	224358034	rs35920703:224651116:C:CT	224463414	224463414	0	7.52425e-18	0.248479	0.0253372	TRUE
cg11060701	chr1	224644643	224644642	1:224833845:G:GACGTAAGACAGTA	224646143	224646143	0	1.22604e-11	0.1642	0.0223572	TRUE
cg06473507	chr1	225422521	225422520	rs11582134:225566618:C:G	225378916	225378916	0	9.26801e-22	0.51598	0.0457355	TRUE
cg17839226	chr1	225478062	225478061	rs1340865:225631404:T:C	225443702	225443702	0	2.89027e-09	-0.12989	0.0205656	FALSE
cg01077274	chr1	225677786	225677785	rs12039910:225864184:A:G	225676482	225676482	0	4.09155e-10	0.172843	0.025825	FALSE
cg15847496	chr1	225700404	225700403	rs6701838	225706721	225706721	0	5.44923e-07	-0.130242	0.0248735	FALSE
cg15633273	chr1	225809337	225809336	rs10737420	225809368	225809368	0	7.55102e-07	-0.231986	0.0449187	FALSE
cg23096144	chr1	225825254	225825253	kgp12212294	225825340	225825340	0	8.18769e-11	0.241338	0.0345004	FALSE
cg04582838	chr1	225877684	225877683	rs360083:226052830:A:G	225865130	225865130	0	1.79658e-07	0.110959	0.0202656	FALSE
cg06939851	chr1	225924835	225924834	rs77157663:226111945:T:C	225924245	225924245	0	2.47102e-09	-0.327849	0.0516579	TRUE
cg00053851	chr1	226082742	226082741	rs4570386:226270779:G:A	226083078	226083078	0	2.0551e-15	-0.266168	0.0300184	FALSE
cg01205584	chr1	226083024	226083023	rs4570386:226270779:G:A	226083078	226083078	0	5.12113e-29	-0.583533	0.0416796	FALSE
cg06965961	chr1	226083041	226083040	rs4570386:226270779:G:A	226083078	226083078	0	3.74559e-12	0.147128	0.0194645	FALSE
cg07731304	chr1	12064058	12064057	rs4314891:12115470:G:C	12055413	12055413	0	2.34172e-08	-0.154589	0.0262077	FALSE
cg01890404	chr1	12069758	12069757	rs61206685:12130218:TGGG:T	12070161	12070164	0	2.16527e-20	-0.269397	0.0250172	TRUE
cg01267259	chr1	12084090	12084089	rs111736717:11472334:A:G	11412277	11412277	0	6.5344e-08	0.746895	0.131317	TRUE
cg20274267	chr1	12104421	12104420	rs10864549:12165037:T:C	12104980	12104980	0	3.9728e-12	-0.320738	0.0424922	FALSE
cg20978923	chr1	12124518	12124517	rs17422381	12124366	12124366	0	6.89618e-07	0.0896959	0.0173006	FALSE
cg07499259	chr1	12128446	12128445	rs17456501:12188614:G:A	12128557	12128557	0	1.04031e-08	-0.469221	0.0773994	FALSE
cg00463840	chr1	12128493	12128492	rs17456501:12188614:G:A	12128557	12128557	0	4.82532e-17	-1.06359	0.111981	FALSE
cg18152455	chr1	12128581	12128580	rs17456501:12188614:G:A	12128557	12128557	0	1.0515e-11	-1.0089	0.13685	FALSE
cg07925752	chr1	12128602	12128601	rs17456501:12188614:G:A	12128557	12128557	0	4.61792e-24	-1.37884	0.113555	FALSE
cg20572374	chr1	12184215	12184214	rs2275416:12254201:G:A	12194144	12194144	0	3.05739e-22	-0.289193	0.0252305	FALSE
cg11726754	chr1	12230584	12230583	exm-rs4846033	11728507	11728507	0	6.33834e-13	-0.618738	0.0785669	TRUE
cg08611640	chr1	12448918	12448917	rs670279:12522308:G:C	12462253	12462253	0	2.93175e-11	-0.15049	0.0209449	FALSE
cg07804749	chr1	12550075	12550074	rs6541031:12609434:C:T	12549404	12549404	0	4.02738e-10	-0.192706	0.0287799	FALSE
cg10169393	chr1	12555871	12555870	rs12141685:12613820:T:C	12553790	12553790	0	3.9257e-07	-0.157265	0.0296305	TRUE
cg09126203	chr1	12601444	12601443	rs12136952:12661421:G:C	12601409	12601409	0	3.23884e-10	0.144168	0.0213989	FALSE
cg20849121	chr1	12619946	12619945	rs4240903:12675699:G:A	12615695	12615695	0	7.48346e-07	0.139112	0.0269255	FALSE
cg18888234	chr1	12856183	12856182	rs138150325:12793596:T:C	12733633	12733633	0	2.92975e-10	-0.464722	0.0687848	TRUE
cg01816014	chr1	13700884	13700883	rs1999943:14008734:A:T	13682239	13682239	0	2.85817e-08	0.109214	0.0186435	FALSE
cg24550112	chr1	13701027	13701026	rs742355:14126361:A:T	13799866	13799866	0	8.30519e-12	-1.03374	0.139411	FALSE
cg24550112	chr1	13701027	13701026	rs7521923:14893157:C:T	14566661	14566661	1	4.65833e-07	-1.42485	0.270352	FALSE
cg16680547	chr1	13701073	13701072	rs79712323:14120250:C:G	13793755	13793755	0	3.56618e-14	-0.237319	0.0283262	FALSE
cg26608693	chr1	13701087	13701086	rs139517091:14027737:TC:T	13701242	13701243	0	1.75469e-14	-0.351698	0.0413744	FALSE
cg09759386	chr1	13892402	13892401	rs2697973:14217159:G:A	13890664	13890664	0	1.07553e-13	-0.220815	0.026973	FALSE
cg14269708	chr1	13892433	13892432	rs2884820:14215074:G:C	13888579	13888579	0	8.58253e-11	-0.222876	0.031901	FALSE
cg06184863	chr1	13930255	13930254	rs12126232:14254728:A:C	13928233	13928233	0	1.54223e-10	0.200946	0.02922	FALSE
cg02366878	chr1	14140972	14140971	rs10803459	14137672	14137672	0	1.22218e-19	-0.323322	0.0308354	TRUE
cg01715450	chr1	14282625	14282624	rs1339363:14611211:A:G	14284716	14284716	0	1.01902e-08	-0.13084	0.0215678	FALSE
cg26270573	chr1	14437355	14437354	rs7547198:14767077:A:G	14440581	14440581	0	6.25386e-07	0.133117	0.0255698	TRUE
cg16293300	chr1	14683342	14683341	rs11584846:15023541:C:G	14697045	14697045	0	8.01437e-12	0.228977	0.030853	FALSE
cg22386492	chr1	14732146	14732145	rs12061422:15054213:C:T	14727717	14727717	0	1.41539e-18	0.820593	0.0813841	FALSE
cg02835848	chr1	14923886	14923885	rs7514440	14956721	14956721	0	1.83838e-10	0.144397	0.0210983	FALSE
cg14258148	chr1	14945265	14945264	rs6687730:15288613:G:C	14962117	14962117	0	5.42482e-07	0.127324	0.0243117	FALSE
cg21413173	chr1	14945457	14945456	rs6687730:15288613:G:C	14962117	14962117	0	1.79334e-14	0.243772	0.0286904	FALSE
cg00682038	chr1	14945776	14945775	rs10927602:15295333:A:G	14968837	14968837	0	1.24127e-07	0.0941013	0.0169446	FALSE
cg07218956	chr1	14977881	14977880	rs7518989:15306051:G:C	14979555	14979555	0	4.75832e-15	0.247428	0.028362	FALSE
cg23238147	chr1	15112518	15112517	rs12046842:15439227:C:A	15112731	15112731	0	6.1508e-17	-0.144994	0.0153312	FALSE
cg24349832	chr1	15152353	15152352	rs35890014:15479259:AG:A	15152763	15152764	0	1.46366e-09	-0.132627	0.0205674	FALSE
cg00188746	chr1	15153763	15153762	rs5772620:15480026:G:GC	15153530	15153530	0	1.3894e-29	0.37649	0.0264862	FALSE
cg07180646	chr1	15155046	15155045	rs10737906:15469455:T:C	15142959	15142959	0	1.03824e-07	0.153124	0.0273873	FALSE
cg22353206	chr1	15171468	15171467	rs6429713:15482235:G:C	15155739	15155739	0	3.58814e-08	-0.215306	0.0370485	TRUE
cg10001905	chr1	15171803	15171802	rs1883758:15503651:C:T	15177155	15177155	0	3.11039e-08	-0.149872	0.0256599	FALSE
cg12651933	chr1	15172056	15172055	rs1883758:15503651:C:T	15177155	15177155	0	1.78957e-22	-0.257152	0.0222661	FALSE
cg09229466	chr1	15172566	15172565	rs1883758:15503651:C:T	15177155	15177155	0	1.9956e-09	-0.162032	0.0253643	FALSE
cg21012057	chr1	15212416	15212415	rs4661607:15537858:T:C	15211362	15211362	0	3.47456e-17	-0.231168	0.0241992	FALSE
cg02394978	chr1	15247071	15247070	rs10927749:15580300:T:C	15253804	15253804	0	8.0886e-07	0.1047	0.0203324	FALSE
cg08815479	chr1	15247101	15247100	rs60912081:15594441:TA:T	15267945	15267946	0	2.38654e-15	0.885937	0.100203	FALSE
cg08815479	chr1	15247101	15247100	1:15583141:CAAAAAAAAAAAAAAA:C	15256645	15256660	1	7.81778e-07	0.595543	0.115484	TRUE
cg11799650	chr1	15247126	15247125	rs4420077:15587095:T:C	15260599	15260599	0	1.6833e-32	0.433817	0.0283064	FALSE
cg06838175	chr1	15247141	15247140	rs1927184:15591074:G:A	15264578	15264578	0	2.06814e-14	0.29507	0.0348285	FALSE
cg20050767	chr1	15272405	15272404	rs55822521:15581004:G:GGGT	15254508	15254508	0	9.59557e-19	0.151396	0.0149203	TRUE
cg13509283	chr1	15416334	15416333	rs2496316:15745254:C:T	15418758	15418758	0	9.63792e-11	0.252076	0.0361925	FALSE
cg19267254	chr1	15501581	15501580	1:15956091:CAA:C	15629596	15629598	0	3.49569e-08	0.131141	0.0225452	TRUE
cg05660106	chr1	15523923	15523922	rs111689880:15817519:AG:A	15491024	15491025	0	2.67511e-33	1.04325	0.0667334	FALSE
cg04708753	chr1	15524461	15524460	rs4233532:15821585:C:T	15495090	15495090	0	3.53511e-30	1.06137	0.0735035	TRUE
cg18379824	chr1	15524476	15524475	rs4593819:15852739:C:G	15526244	15526244	0	9.39358e-37	0.664642	0.0391406	FALSE
cg09992259	chr1	15541998	15541997	rs111689880:15817519:AG:A	15491024	15491025	0	1.03122e-25	-0.633117	0.0496188	TRUE
cg23749507	chr1	15585231	15585230	rs76986450:15852060:GA:G	15525565	15525566	0	2.80675e-10	-0.13803	0.0204058	TRUE
cg22956858	chr1	15737623	15737622	rs7539884	15729436	15729436	0	5.4051e-31	0.689905	0.0467741	FALSE
cg10483611	chr1	15737688	15737687	rs7539884	15729436	15729436	0	1.89477e-20	0.231788	0.0214813	FALSE
cg03420647	chr1	15737745	15737744	rs7539884	15729436	15729436	0	4.10223e-38	0.735781	0.0419949	FALSE
cg16109817	chr1	15835715	15835714	rs6666548:16162554:G:C	15836059	15836059	0	1.75285e-25	0.460508	0.0363364	FALSE
cg09819513	chr1	16013353	16013352	rs1572381:16344494:G:A	16017999	16017999	0	3.05688e-15	-0.137279	0.0156011	FALSE
cg27183248	chr1	16018201	16018200	rs6660685:16346988:A:G	16020493	16020493	0	5.15976e-16	-0.256981	0.0282376	FALSE
cg10182306	chr1	16031417	16031416	rs2003943:16366365:C:G	16039870	16039870	0	1.50049e-11	0.203449	0.0278407	TRUE
cg21660130	chr1	16043749	16043748	rs76283532:16369772:C:G	16043277	16043277	0	1.99282e-07	-0.141124	0.0258793	TRUE
cg21853568	chr1	16082408	16082407	rs4077113:16408820:G:C	16082325	16082325	0	2.38483e-07	-0.0890585	0.0164472	FALSE
cg10312679	chr1	16115885	16115884	rs4661686:16410124:C:G	16083629	16083629	0	2.86468e-12	0.218659	0.0287449	FALSE
cg14942617	chr1	16152555	16152554	rs6603867	16148206	16148206	0	8.17243e-13	-0.267335	0.034141	FALSE
cg00949922	chr1	16187888	16187887	rs12024558:16518748:T:A	16192253	16192253	0	3.99926e-16	0.158756	0.0173625	FALSE
cg03133876	chr1	16206496	16206495	rs72636555:16521236:A:G	16194741	16194741	0	3.75263e-09	0.458475	0.0731845	TRUE
cg20281040	chr1	16206569	16206568	rs221062:16536548:G:A	16210053	16210053	0	9.45191e-30	0.345257	0.0241813	FALSE
cg11895451	chr1	16207397	16207396	exm21605	16208151	16208151	0	3.50862e-17	-0.19631	0.0205537	FALSE
cg06365898	chr1	16207413	16207412	rs11260932:16519161:A:G	16192666	16192666	0	3.38496e-17	0.993913	0.103998	FALSE
cg06365898	chr1	16207413	16207412	rs12751725:16539577:G:A	16213082	16213082	1	3.06671e-07	0.64272	0.119891	FALSE
cg20430773	chr1	16207663	16207662	rs221053:16533096:C:T	16206601	16206601	0	1.13902e-30	-0.447331	0.0305835	FALSE
cg23105827	chr1	16212625	16212624	rs61771381:16514898:C:T	16188403	16188403	0	2.59962e-10	0.146138	0.0215582	FALSE
cg03522107	chr1	16226835	16226834	rs3738631:16559541:C:G	16233046	16233046	0	1.85916e-09	-0.125729	0.0196392	FALSE
cg02987928	chr1	16226962	16226961	rs3738631:16559541:C:G	16233046	16233046	0	1.11851e-09	-0.171861	0.0264387	FALSE
cg20611680	chr1	16227677	16227676	rs3795745:16557390:C:T	16230895	16230895	0	1.07151e-09	-0.168966	0.0259603	FALSE
cg17463745	chr1	16227908	16227907	rs11260710:16564863:A:G	16238368	16238368	0	1.95091e-07	-0.0950396	0.0174139	FALSE
cg27540189	chr1	16493165	16493164	rs156854:16817310:T:C	16490815	16490815	0	2.8378e-07	0.106647	0.019832	FALSE
cg06662252	chr1	16520663	16520662	rs277460:16847190:G:C	16520695	16520695	0	8.36071e-11	0.230288	0.032939	FALSE
cg07925738	chr1	16521345	16521344	rs277462	16521337	16521337	0	1.40463e-25	0.373712	0.0294043	TRUE
cg09507771	chr1	16613201	16613200	rs536183:17025690:C:T	16699195	16699195	0	1.43199e-08	0.268441	0.0447539	TRUE
cg25602718	chr1	16617570	16617569	rs10907231:16851440:C:T	16524945	16524945	0	5.21264e-12	0.524375	0.0699235	FALSE
cg12442246	chr1	16678270	16678269	rs10907261:17004785:A:C	16678290	16678290	0	1.44195e-10	0.636545	0.0923922	FALSE
cg05208572	chr1	16701447	16701446	rs567368:17026802:C:G	16700307	16700307	0	6.67224e-11	-0.142499	0.0202607	TRUE
cg12648811	chr1	16727392	16727391	rs1977269	16678355	16678355	0	5.26086e-10	0.921373	0.138657	FALSE
cg09004167	chr1	16727489	16727488	rs9663015:16950346:A:C	16623851	16623851	0	1.02134e-16	-0.918221	0.0979677	TRUE
cg14981532	chr1	16888983	16888982	1:17218530:A:G	16892035	16892035	0	1.88037e-07	-0.39963	0.0731181	TRUE
cg17179842	chr1	16889673	16889672	rs12757283:17293892:G:A	16967397	16967397	0	5.57703e-07	0.350843	0.0670687	TRUE
cg11079989	chr1	16896221	16896220	rs3928793:17213140:C:A	16886645	16886645	0	3.34945e-08	0.152345	0.0261512	TRUE
cg24306142	chr1	16905299	16905298	rs34939688:17211511:C:CT	16885016	16885016	0	4.18425e-10	-0.933979	0.139638	TRUE
cg24306142	chr1	16905299	16905298	exm22429	16931345	16931345	1	7.49194e-08	-1.44444	0.255235	TRUE
cg18117094	chr1	16913895	16913894	rs1831373:17211220:C:A	16884725	16884725	0	3.19222e-10	-0.182324	0.0270513	TRUE
cg20065512	chr1	16927937	16927936	rs35331284:17246587:AT:A	16920092	16920093	0	6.27265e-10	0.980531	0.148309	TRUE
cg24791205	chr1	16935307	16935306	rs10907231:16851440:C:T	16524945	16524945	0	5.02641e-09	-0.143914	0.0231856	TRUE
cg04558298	chr1	16951855	16951854	rs59177112:16831368:G:A	16504873	16504873	0	4.43647e-14	0.274884	0.0329585	TRUE
cg01783960	chr1	16972046	16972045	rs116376266:17284247:A:T	16957752	16957752	0	3.68108e-22	0.77914	0.0681549	TRUE
cg01968256	chr1	17016228	17016227	rs11203280:17342783:G:T	17016288	17016288	0	3.5208e-15	0.200267	0.0228217	FALSE
cg17574483	chr1	17024072	17024071	rs2746474:17348544:T:G	17022049	17022049	0	1.52175e-10	-0.149581	0.0217429	FALSE
cg06004306	chr1	17098666	17098665	rs910223	17133360	17133360	0	5.2245e-19	0.544392	0.053127	FALSE
cg06900068	chr1	17099829	17099828	rs910223	17133360	17133360	0	1.84252e-07	0.195516	0.0357443	FALSE
cg27529520	chr1	17112235	17112234	rs1022579:17439195:A:C	17112700	17112700	0	3.8167e-21	0.667469	0.0603963	FALSE
cg16835277	chr1	17113791	17113790	rs1022579:17439195:A:C	17112700	17112700	0	5.10958e-14	0.330063	0.0396908	FALSE
cg00597915	chr1	17115310	17115309	rs910223	17133360	17133360	0	4.78921e-14	0.476456	0.0572178	FALSE
cg15590113	chr1	17116486	17116485	rs35989645:17455376:AT:A	17128881	17128882	0	2.38275e-14	0.203501	0.0240895	TRUE
cg10233913	chr1	17119668	17119667	rs910223	17133360	17133360	0	1.09495e-07	0.269981	0.0483848	TRUE
cg25960632	chr1	17119824	17119823	rs12130579:17443793:T:A	17117298	17117298	0	1.41837e-07	0.285968	0.0517558	TRUE
cg00569276	chr1	17120051	17120050	rs910223	17133360	17133360	0	3.00005e-11	0.394967	0.0550031	FALSE
cg18879300	chr1	17120274	17120273	rs910223	17133360	17133360	0	2.66582e-09	0.203845	0.0321943	FALSE
cg21838303	chr1	17237463	17237462	rs2977306:17563967:T:C	17237472	17237472	0	9.78241e-12	-0.228776	0.0309768	TRUE
cg21966975	chr1	17248926	17248925	rs2977228	17250004	17250004	0	5.79718e-09	-0.137781	0.0222989	FALSE
cg08277548	chr1	17274386	17274385	rs11585357	17274670	17274670	0	5.19504e-31	-0.722246	0.048945	FALSE
cg17840833	chr1	17304880	17304879	rs12037653:17600317:C:T	17273822	17273822	0	7.74935e-14	0.164317	0.0199327	FALSE
cg11347165	chr1	17305150	17305149	rs57760668:17579633:T:G	17253138	17253138	0	2.25432e-07	0.174082	0.0320778	FALSE
cg20787649	chr1	17310404	17310403	rs2293917	17274588	17274588	0	2.35216e-11	-0.161233	0.0223147	FALSE
cg00279848	chr1	17336079	17336078	rs10888017:17638752:C:T	17312257	17312257	0	1.48407e-11	-0.164649	0.022525	FALSE
cg08545598	chr1	153866551	153866550	rs10127983	153950800	153950800	0	1.73557e-30	0.576825	0.0396252	FALSE
cg20739354	chr1	153926077	153926076	rs11264446	153833259	153833259	0	3.30011e-10	-0.605637	0.089942	FALSE
cg26530713	chr1	153955931	153955930	rs72149705:153989995:C:CT	154017519	154017519	0	1.17209e-06	-0.069855	0.013786	TRUE
cg06600967	chr1	153968510	153968509	rs4845586:153942597:T:G	153970121	153970121	0	1.42873e-11	-0.158512	0.0216649	FALSE
cg13328788	chr1	154154613	154154612	rs199864074:153808087:A:AC	153835611	153835611	0	4.29173e-12	-2.17921	0.28924	TRUE
cg05139571	chr1	154154663	154154662	rs199864074:153808087:A:AC	153835611	153835611	0	2.26613e-13	-1.88437	0.2339	TRUE
cg00006626	chr1	154154987	154154986	rs199864074:153808087:A:AC	153835611	153835611	0	2.25891e-12	-1.63106	0.213228	TRUE
cg03352427	chr1	154155048	154155047	rs199864074:153808087:A:AC	153835611	153835611	0	2.11734e-11	-1.28791	0.177773	TRUE
cg17167920	chr1	154155062	154155061	rs199864074:153808087:A:AC	153835611	153835611	0	1.32621e-11	-1.55059	0.211537	TRUE
cg17383186	chr1	154155154	154155153	rs199864074:153808087:A:AC	153835611	153835611	0	1.95295e-08	-0.888032	0.149615	TRUE
cg16274678	chr1	154155477	154155476	rs199864074:153808087:A:AC	153835611	153835611	0	4.83397e-09	-1.0034	0.161455	TRUE
cg19757176	chr1	154155566	154155565	rs199864074:153808087:A:AC	153835611	153835611	0	1.1891e-11	-1.04135	0.141681	TRUE
cg03424262	chr1	154348439	154348438	rs2297606:154321084:G:T	154348608	154348608	0	2.96544e-07	0.154571	0.0287945	FALSE
cg13364689	chr1	154559418	154559417	exm2259811	154559434	154559434	0	1.00607e-09	0.477734	0.0732634	FALSE
cg24498305	chr1	154568429	154568428	rs111467941:154535000:T:TA	154562524	154562524	0	3.89439e-11	0.30479	0.0427308	FALSE
cg20246707	chr1	154591554	154591553	rs36121466:154589648:C:A	154617172	154617172	0	3.62584e-08	0.137545	0.0236767	TRUE
cg03920003	chr1	154609532	154609531	rs1127313:154556425:G:A	154583949	154583949	0	3.07252e-08	-0.108141	0.0185071	FALSE
cg16489975	chr1	154760960	154760959	rs6682291	154760300	154760300	0	6.54881e-07	0.231759	0.0446041	FALSE
cg22732644	chr1	154772649	154772648	rs56995760:154744141:G:A	154771665	154771665	0	1.68413e-14	0.234673	0.0275844	FALSE
cg09359103	chr1	154867434	154867433	rs35704440:154878845:C:CT	154906369	154906369	0	1.81169e-10	-0.156389	0.0228413	TRUE
cg16680214	chr1	154867508	154867507	rs7553195	154865320	154865320	0	8.43537e-08	-0.154085	0.0273466	FALSE
cg03003668	chr1	154868414	154868413	rs7553195	154865320	154865320	0	5.87382e-14	-0.227425	0.0274281	FALSE
cg24250549	chr1	154936765	154936764	rs7553195	154865320	154865320	0	1.39926e-07	0.0873183	0.0157951	FALSE
cg03351412	chr1	154936776	154936775	rs4297285:154871690:T:A	154899214	154899214	0	5.39654e-10	0.152614	0.0229836	TRUE
cg06418219	chr1	154975830	154975829	rs12087657:154948327:G:T	154975851	154975851	0	3.76943e-24	0.545409	0.0447957	FALSE
cg22505006	chr1	155009354	155009353	rs6686021:154983539:C:T	155011063	155011063	0	8.47667e-08	-0.144692	0.0256842	FALSE
cg19352308	chr1	155033624	155033623	rs4845405:155007302:C:A	155034826	155034826	0	2.90719e-16	-0.263255	0.0286232	TRUE
cg21504176	chr1	155033643	155033642	rs4845704:155008318:C:A	155035842	155035842	0	2.19073e-11	-0.176724	0.0244145	FALSE
cg16830523	chr1	155050516	155050515	rs115165870:154303228:G:A	154330752	154330752	0	4.90659e-08	0.362361	0.0630518	TRUE
cg21199495	chr1	155086687	155086686	rs58925616:155067533:G:A	155095057	155095057	0	4.54228e-08	0.224972	0.0390375	FALSE
cg23973274	chr1	155087697	155087696	rs4845708:155053728:C:T	155081252	155081252	0	5.46309e-21	-0.351886	0.0320098	FALSE
cg23891169	chr1	155113681	155113680	rs11264322:155087933:G:A	155115457	155115457	0	9.57123e-17	0.25394	0.0270622	TRUE
cg22049894	chr1	155140671	155140670	rs4971073:155113104:G:T	155140628	155140628	0	3.21715e-08	0.0669322	0.0114732	FALSE
cg14375345	chr1	155230567	155230566	rs12034326	155244682	155244682	0	4.61607e-09	0.12382	0.0198945	FALSE
cg18157364	chr1	155236559	155236558	rs12407919:155199315:C:G	155229524	155229524	0	1.02584e-06	-0.228567	0.0448456	TRUE
cg18528640	chr1	155610174	155610173	rs111951498:155678945:CT:C	155709154	155709155	0	5.36516e-09	-0.124916	0.0201669	TRUE
cg06815194	chr1	155745720	155745719	rs66627415:155356352:AT:A	155386561	155386562	0	2.60449e-10	-0.314051	0.0463311	TRUE
cg00504075	chr1	155857766	155857765	rs12040894:155761508:A:G	155791717	155791717	0	7.69497e-20	-0.510398	0.0483279	TRUE
cg12738981	chr1	155858567	155858566	rs6662953:155754448:C:T	155784657	155784657	0	4.03655e-15	0.202152	0.0230979	FALSE
cg06440960	chr1	155859136	155859135	rs11578696:156056968:A:G	156087177	156087177	0	2.40705e-07	0.151682	0.0280227	TRUE
cg01769968	chr1	155921454	155921453	rs61751623:154938214:C:G	154965738	154965738	0	9.33407e-07	0.236165	0.0461466	TRUE
cg16859077	chr1	155929214	155929213	rs4661175:155931368:G:A	155961577	155961577	0	1.14682e-33	-0.896409	0.056824	FALSE
cg13550542	chr1	155934486	155934485	rs16837619:156674046:C:A	156704254	156704254	0	6.26891e-09	0.834165	0.135344	TRUE
cg16848098	chr1	155934574	155934573	rs5777963:155890042:A:AAC	155920251	155920251	0	8.54788e-24	0.656403	0.0545065	TRUE
cg08783638	chr1	155934957	155934956	rs61540196:155907151:C:CT	155937360	155937360	0	1.4778e-06	-0.153157	0.0305386	TRUE
cg06957790	chr1	155935057	155935056	rs6693528:155865064:A:T	155895273	155895273	0	4.41507e-09	-0.343716	0.0551478	FALSE
cg15685922	chr1	156075418	156075417	rs11264435:156059276:G:A	156089485	156089485	0	1.07705e-09	-0.110779	0.0170228	FALSE
cg12639442	chr1	156084594	156084593	rs74965833:156054119:C:T	156084328	156084328	0	7.71618e-08	0.194187	0.0343504	TRUE
cg00107970	chr1	156149667	156149666	rs536857:156111287:A:G	156141496	156141496	0	2.27267e-07	-0.0935596	0.0172456	TRUE
cg24544113	chr1	156193897	156193896	rs10157319:156157258:C:T	156187467	156187467	0	1.67208e-18	0.244069	0.0242722	TRUE
cg25208724	chr1	156194054	156194053	rs11264457:156157490:T:A	156187699	156187699	0	6.95768e-35	1.07851	0.0663802	FALSE
cg06970220	chr1	156194070	156194069	rs11264457:156157490:T:A	156187699	156187699	0	2.02699e-19	0.221925	0.0213339	FALSE
cg24450063	chr1	156194109	156194108	rs11264457:156157490:T:A	156187699	156187699	0	8.52929e-40	0.973381	0.0534922	FALSE
cg14980620	chr1	156247167	156247166	rs7512751:156234439:T:G	156264648	156264648	0	1.82716e-07	0.10755	0.0196558	FALSE
cg09604463	chr1	156248550	156248549	rs11389824:156306071:A:AT	156336280	156336280	0	2.12671e-11	0.245008	0.0338226	TRUE
cg11078824	chr1	156260111	156260110	rs933489	156265329	156265329	0	1.59342e-11	0.156407	0.0214354	FALSE
cg01646665	chr1	156281646	156281645	rs2842859:156324076:T:C	156354285	156354285	0	1.1606e-12	0.161823	0.0208317	FALSE
cg14500718	chr1	156281666	156281665	rs71636865:156282447:T:TAA	156312656	156312656	0	7.78263e-09	-0.146463	0.0239308	TRUE
cg21786334	chr1	156295640	156295639	rs2104404:156256913:C:A	156287122	156287122	0	3.53404e-07	-0.129391	0.0242748	FALSE
cg14496951	chr1	156295727	156295726	rs7523099:156234638:G:A	156264847	156264847	0	9.49122e-07	-0.136776	0.0267454	FALSE
cg12664795	chr1	156301128	156301127	rs58390527:156334116:C:T	156364325	156364325	0	4.55636e-07	0.128686	0.0243946	FALSE
cg19759212	chr1	156336370	156336369	rs2296375:156309372:G:C	156339581	156339581	0	4.4394e-17	0.710314	0.0746765	TRUE
cg07133861	chr1	156360146	156360145	rs12022657:156314147:A:G	156344356	156344356	0	6.83523e-15	0.160574	0.0185377	FALSE
cg07702888	chr1	156369003	156369002	rs10127551:156559659:G:A	156589867	156589867	0	5.20018e-07	0.150726	0.0287295	TRUE
cg18173474	chr1	156372949	156372948	rs11585523:156342801:G:A	156373010	156373010	0	1.43074e-21	0.404079	0.0360425	FALSE
cg14087168	chr1	156480878	156480877	rs1171557:156451264:C:T	156481472	156481472	0	8.42645e-09	-0.090541	0.014832	FALSE
cg12689752	chr1	156525762	156525761	rs7533916:156492927:A:C	156523135	156523135	0	2.6422e-17	0.461416	0.0480726	FALSE
cg16168311	chr1	156592156	156592155	rs1171564:156498673:T:A	156528881	156528881	0	5.32651e-07	0.0980638	0.0187104	FALSE
cg04127455	chr1	156602940	156602939	rs6427323:156577789:G:C	156607997	156607997	0	7.94895e-07	-0.139936	0.027155	FALSE
cg01612182	chr1	156623469	156623468	rs3795727:156589450:C:T	156619658	156619658	0	2.45465e-16	-0.260093	0.0281923	FALSE
cg24268531	chr1	156623848	156623847	rs3795727:156589450:C:T	156619658	156619658	0	1.17782e-17	-0.397932	0.0408865	FALSE
cg00735267	chr1	156623877	156623876	rs146098067:156586882:A:AAAAG	156617090	156617090	0	4.44162e-18	0.225466	0.0227878	TRUE
cg01561528	chr1	156623907	156623906	rs146098067:156586882:A:AAAAG	156617090	156617090	0	1.07164e-17	0.252911	0.0259442	FALSE
cg12567310	chr1	156624052	156624051	rs146098067:156586882:A:AAAAG	156617090	156617090	0	7.87044e-10	0.551389	0.0839514	TRUE
cg10640435	chr1	156624897	156624896	rs11576266:156572159:A:G	156602367	156602367	0	4.54104e-08	0.144272	0.025034	FALSE
cg02289013	chr1	156661715	156661714	rs10682421:156631566:C:CAT	156661774	156661774	0	1.91447e-17	0.252395	0.0261498	TRUE
cg12356261	chr1	156677468	156677467	rs11264519:156652303:A:G	156682511	156682511	0	1.08408e-07	0.12195	0.0218471	FALSE
cg04671462	chr1	156677811	156677810	rs2886443:156640678:G:A	156670886	156670886	0	2.2298e-12	0.205668	0.0268787	FALSE
cg24553170	chr1	48777801	48777800	rs11205541:49254416:C:T	48788744	48788744	0	1.88028e-15	0.212602	0.0239364	FALSE
cg15322801	chr1	50106272	50106271	rs4593875:50591851:G:A	50126179	50126179	0	1.09317e-07	0.0938757	0.016823	TRUE
cg07174182	chr1	50661890	50661889	rs59543294:51495673:T:C	51030001	51030001	0	3.03806e-09	-0.267339	0.0423935	TRUE
cg04603972	chr1	50960724	50960723	rs141543558:51942910:C:T	51477238	51477238	0	1.60656e-06	0.133807	0.0267806	TRUE
cg02899037	chr1	50961475	50961474	rs145798814:51084589:C:T	50618917	50618917	0	4.08571e-07	-0.294625	0.0556016	TRUE
cg10782081	chr1	51088773	51088772	rs72663117:52048969:A:G	51583297	51583297	0	2.03152e-06	-0.325091	0.0657628	TRUE
cg11927626	chr1	51322281	51322280	rs77987156:51841760:C:G	51376088	51376088	0	3.10296e-17	-1.37943	0.144118	TRUE
cg02451673	chr1	51518308	51518307	rs180919985:52431147:C:T	51965475	51965475	0	3.79512e-07	0.308721	0.0580865	TRUE
cg03072343	chr1	51616574	51616573	rs12064693:52206160:A:G	51740488	51740488	0	4.9752e-07	0.266437	0.0506916	FALSE
cg24348107	chr1	51616904	51616903	rs72896012:52082594:G:C	51616922	51616922	0	9.1819e-14	0.457655	0.055716	FALSE
cg20967006	chr1	51877729	51877728	rs12135327:52297961:C:T	51832289	51832289	0	4.46435e-08	-0.153009	0.0265339	FALSE
cg10884068	chr1	51909931	51909930	rs1891263:52377787:T:C	51912115	51912115	0	1.33767e-09	-0.195448	0.030228	FALSE
cg17140222	chr1	51919376	51919375	rs41293271:52385081:G:A	51919409	51919409	0	3.12318e-09	-0.774193	0.122874	TRUE
cg19751897	chr1	52055156	52055155	rs142834436:52520858:CACA:C	52055186	52055189	0	4.3523e-11	0.362967	0.0510337	TRUE
cg26251270	chr1	52602161	52602160	rs11810754:53067914:T:G	52602242	52602242	0	1.19392e-08	0.263633	0.0436861	FALSE
cg22129364	chr1	52602223	52602222	rs11810754:53067914:T:G	52602242	52602242	0	1.2341e-08	-0.195188	0.0323799	FALSE
cg06612871	chr1	52602262	52602261	rs946155:53073397:G:T	52607725	52607725	0	2.98054e-21	-0.383407	0.0345668	FALSE
cg23272399	chr1	52602908	52602907	rs946155:53073397:G:T	52607725	52607725	0	8.54423e-14	0.277504	0.0337326	FALSE
cg02453146	chr1	52602916	52602915	rs946155:53073397:G:T	52607725	52607725	0	2.07311e-12	0.218455	0.0285013	FALSE
cg23065788	chr1	52614408	52614407	rs11205978:53076057:G:A	52610385	52610385	0	4.98196e-12	1.42985	0.190458	FALSE
cg23065788	chr1	52614408	52614407	rs144831947:53063384:CTT:C	52597712	52597714	1	1.48209e-06	-0.589117	0.117482	TRUE
cg16325326	chr1	52726390	52726389	rs269291:53189297:C:T	52723625	52723625	0	1.53973e-25	1.04575	0.0823777	FALSE
cg04527603	chr1	52726417	52726416	rs76280926:53192082:T:G	52726410	52726410	0	1.6749e-19	0.229889	0.0220332	TRUE
cg24675658	chr1	52726425	52726424	rs76280926:53192082:T:G	52726410	52726410	0	2.13316e-19	0.217302	0.0209063	FALSE
cg18002154	chr1	52841662	52841661	rs564640:53285187:T:C	52819515	52819515	0	5.54919e-11	0.176033	0.0249078	FALSE
cg09167911	chr1	52842194	52842193	rs534070:53308858:T:G	52843186	52843186	0	2.06891e-07	-0.193893	0.0356081	FALSE
cg18184411	chr1	52843590	52843589	rs533935:53308807:T:C	52843135	52843135	0	9.12617e-07	-0.142936	0.0279024	FALSE
cg10554624	chr1	52920947	52920946	rs35488175:53439017:C:CT	52973345	52973345	0	2.99052e-13	0.164464	0.0205383	TRUE
cg12060472	chr1	52921759	52921758	rs56222568:53432786:T:C	52967114	52967114	0	1.4798e-08	0.177927	0.0296964	FALSE
cg06600287	chr1	52922048	52922047	rs36122767:53419653:CA:C	52953981	52953982	0	8.68927e-14	-0.252385	0.0306901	TRUE
cg21538631	chr1	52925991	52925990	rs12566379:53249669:T:G	52783997	52783997	0	5.78827e-08	0.18733	0.0327909	TRUE
cg22082456	chr1	52926867	52926866	rs35488175:53439017:C:CT	52973345	52973345	0	9.45417e-09	0.170367	0.0280141	TRUE
cg27535305	chr1	52926979	52926978	rs1242331:53392908:A:G	52927236	52927236	0	6.77001e-30	-0.575548	0.0401561	FALSE
cg08859206	chr1	52927103	52927102	rs1242331:53392908:A:G	52927236	52927236	0	7.56753e-22	-0.654277	0.057825	FALSE
cg25767906	chr1	52927110	52927109	rs1242331:53392908:A:G	52927236	52927236	0	3.29064e-27	-0.677413	0.0508564	FALSE
cg20055417	chr1	52927173	52927172	rs1242331:53392908:A:G	52927236	52927236	0	4.53817e-29	-0.980277	0.0699186	FALSE
cg05909164	chr1	52927188	52927187	rs112988376:53350982:T:TTTTTGTTTTG	52885310	52885310	0	1.89699e-28	-0.820899	0.0595458	TRUE
cg24543286	chr1	52927210	52927209	rs112988376:53350982:T:TTTTTGTTTTG	52885310	52885310	0	4.23164e-27	-0.701446	0.0528232	TRUE
cg03609269	chr1	52927352	52927351	rs1242331:53392908:A:G	52927236	52927236	0	2.30881e-26	-0.619781	0.0476647	FALSE
cg12220753	chr1	52927359	52927358	rs112988376:53350982:T:TTTTTGTTTTG	52885310	52885310	0	7.71096e-27	-0.75329	0.057148	TRUE
cg13685833	chr1	52927363	52927362	rs112988376:53350982:T:TTTTTGTTTTG	52885310	52885310	0	2.3785e-16	-0.779331	0.0844257	TRUE
cg04310824	chr1	52927626	52927625	rs1242331:53392908:A:G	52927236	52927236	0	1.86125e-11	-0.225744	0.0310588	TRUE
cg03579872	chr1	52927802	52927801	rs1242331:53392908:A:G	52927236	52927236	0	4.10193e-24	-0.426677	0.0350835	FALSE
cg01802117	chr1	52927889	52927888	rs1242331:53392908:A:G	52927236	52927236	0	5.61153e-28	-1.20508	0.0885522	FALSE
cg02813845	chr1	52928081	52928080	rs1242331:53392908:A:G	52927236	52927236	0	2.85066e-28	-0.839526	0.0611927	FALSE
cg05232215	chr1	52928154	52928153	rs112988376:53350982:T:TTTTTGTTTTG	52885310	52885310	0	1.34998e-24	-0.772112	0.0625593	FALSE
cg20290145	chr1	52994305	52994304	rs140655771:54229971:G:A	53764298	53764298	0	1.50927e-09	1.81745	0.282106	TRUE
cg17147442	chr1	53069985	53069984	rs58924052:53565054:T:C	53099382	53099382	0	2.40506e-09	-0.231762	0.0364876	TRUE
cg26391777	chr1	53070515	53070514	rs78624382:53547188:G:T	53081516	53081516	0	1.54029e-12	-0.608367	0.0788271	FALSE
cg08154998	chr1	53074826	53074825	rs78624382:53547188:G:T	53081516	53081516	0	2.97414e-15	-0.604551	0.0686678	FALSE
cg12689055	chr1	53075999	53075998	rs78624382:53547188:G:T	53081516	53081516	0	1.03961e-19	-0.582857	0.0554474	FALSE
cg13922745	chr1	53078913	53078912	rs35161056:53572574:C:G	53106902	53106902	0	2.6107e-14	0.264708	0.0313935	FALSE
cg05480453	chr1	53078943	53078942	rs55886134:53545671:TAAA:T	53079999	53080002	0	5.5889e-12	0.343614	0.0458967	FALSE
cg17127511	chr1	53080934	53080933	rs58924052:53565054:T:C	53099382	53099382	0	2.85398e-10	-0.373726	0.0552758	TRUE
cg12689689	chr1	53082857	53082856	rs138759094:53502464:AT:A	53036792	53036793	0	9.81881e-09	-0.336886	0.0554646	TRUE
cg15844936	chr1	53085628	53085627	rs1288397:53551293:A:G	53085621	53085621	0	2.58356e-09	-0.199077	0.031411	TRUE
cg10137383	chr1	53135258	53135257	rs1288335:53630531:A:G	53164859	53164859	0	2.30332e-08	0.207474	0.0351534	FALSE
cg14898108	chr1	53143018	53143017	rs2404211:53607666:T:C	53141994	53141994	0	1.58479e-15	0.188818	0.0211895	FALSE
cg24406619	chr1	53146313	53146312	rs200683145:53619701:AT:A	53154029	53154030	0	1.19527e-06	-0.109971	0.0217218	TRUE
cg18170581	chr1	53195151	53195150	exm60284	53210776	53210776	0	7.06155e-07	-0.128754	0.0248592	FALSE
cg20780708	chr1	53197143	53197142	rs72673121:53662823:C:A	53197151	53197151	0	2.75043e-13	0.179833	0.0224165	FALSE
cg11551829	chr1	53450014	53450013	rs112170557:53915383:T:A	53449710	53449710	0	4.29102e-11	-0.32431	0.0455817	TRUE
cg10892335	chr1	53500646	53500645	rs61533544:53960678:TTGTG:T	53495005	53495009	0	1.62496e-10	0.123104	0.0179264	TRUE
cg06905679	chr1	53542454	53542453	rs3889185:54008488:G:C	53542815	53542815	0	1.09063e-06	-0.142912	0.028115	FALSE
cg23988737	chr1	53663778	53663777	rs6658469:54133345:C:A	53667672	53667672	0	2.11105e-08	-0.154549	0.0261076	FALSE
cg26932889	chr1	53669798	53669797	rs28743002:54125615:G:A	53659942	53659942	0	1.55304e-08	-0.17893	0.0299125	FALSE
cg16733714	chr1	53853281	53853280	rs78078784:55030678:T:C	54565005	54565005	0	3.22775e-08	0.26347	0.0451678	TRUE
cg05803265	chr1	53886535	53886534	rs6687200:54335640:G:A	53869967	53869967	0	2.72636e-21	-0.181534	0.0163452	FALSE
cg01401694	chr1	53889888	53889887	rs6662856:54360879:T:C	53895206	53895206	0	1.83866e-27	0.256925	0.0191521	FALSE
cg06269281	chr1	53889898	53889897	rs6662856:54360879:T:C	53895206	53895206	0	1.26912e-24	0.318137	0.0257557	FALSE
cg24160082	chr1	53889900	53889899	rs7541876:54363897:C:G	53898224	53898224	0	2.63182e-14	0.149576	0.0177422	FALSE
cg03341469	chr1	53890234	53890233	rs10888814:54355041:A:G	53889368	53889368	0	1.97487e-18	0.379685	0.0378624	FALSE
cg25873615	chr1	53890588	53890587	rs6687200:54335640:G:A	53869967	53869967	0	1.80402e-07	-0.109372	0.019979	TRUE
cg26030025	chr1	54049113	54049112	rs140718974:54397856:T:C	53932183	53932183	0	2.16888e-09	-0.485984	0.0762688	FALSE
cg27428660	chr1	54053502	54053501	rs201851293:53601810:ACT:A	53136138	53136140	0	3.03806e-07	-0.195165	0.036392	TRUE
cg10965749	chr1	54154223	54154222	rs79950126:54606148:C:T	54140475	54140475	0	4.16539e-12	-0.229818	0.0304812	FALSE
cg04095833	chr1	54203392	54203391	rs34405903:54684259:A:G	54218586	54218586	0	4.58055e-16	-0.361803	0.0396682	FALSE
cg24995061	chr1	54250198	54250197	rs622808:54715921:A:G	54250248	54250248	0	5.31749e-08	-0.21023	0.0366866	TRUE
cg05461140	chr1	54298961	54298960	rs2183162:54762721:T:G	54297048	54297048	0	6.26043e-11	-0.363349	0.0515751	FALSE
cg08106066	chr1	54475498	54475497	rs79711866:54941934:T:C	54476261	54476261	0	7.04338e-07	-0.122463	0.0236419	TRUE
cg11985186	chr1	54499321	54499320	rs299875:54966165:T:C	54500492	54500492	0	1.01712e-09	0.124732	0.0191345	FALSE
cg15258974	chr1	54540931	54540930	rs7548057:55006557:A:C	54540884	54540884	0	3.12899e-16	-0.48657	0.0529752	FALSE
cg02410801	chr1	54580393	54580392	rs300271:55046039:G:T	54580366	54580366	0	3.28035e-08	0.12937	0.022191	FALSE
cg01517571	chr1	54624287	54624286	rs2060387:55089316:A:C	54623643	54623643	0	4.81867e-19	-0.457534	0.0445927	FALSE
cg13369817	chr1	54651194	54651193	rs1655523:55115501:T:G	54649828	54649828	0	4.7333e-08	0.159096	0.0276474	FALSE
cg10613814	chr1	54668765	54668764	rs36015308:55133445:T:TA	54667772	54667772	0	9.24877e-13	-0.239253	0.0306405	TRUE
cg16397644	chr1	54698650	54698649	rs644955:55168084:C:T	54702411	54702411	0	1.59228e-07	-0.141254	0.0256786	TRUE
cg06221218	chr1	54764953	54764952	rs7519299:55417370:T:C	54951697	54951697	0	4.95992e-08	0.123286	0.0214604	TRUE
cg20008667	chr1	54806009	54806008	rs2307949:55262958:CAT:C	54797285	54797287	0	3.99583e-10	-0.143803	0.0214717	TRUE
cg22409500	chr1	54806012	54806011	rs2307949:55262958:CAT:C	54797285	54797287	0	1.21406e-11	-0.275284	0.0374731	TRUE
cg17779831	chr1	54806021	54806020	rs2307949:55262958:CAT:C	54797285	54797287	0	2.01783e-09	-0.139265	0.0218077	TRUE
cg11734230	chr1	54937873	54937872	rs7516855:55387039:T:G	54921366	54921366	0	4.24438e-12	-0.145071	0.0192497	TRUE
cg05306153	chr1	54950742	54950741	rs7519299:55417370:T:C	54951697	54951697	0	3.72279e-10	0.265449	0.0395556	FALSE
cg15129052	chr1	54951083	54951082	rs12117612:55435971:A:G	54970298	54970298	0	4.47571e-12	-0.169711	0.0225479	FALSE
cg26903748	chr1	54979930	54979929	rs2433673:55443605:C:G	54977932	54977932	0	1.43364e-08	0.0963175	0.0160585	FALSE
cg07192718	chr1	54980165	54980164	rs200147176:55448782:G:T	54983109	54983109	0	1.23652e-16	-0.282099	0.0302011	TRUE
cg02008416	chr1	54980208	54980207	rs2500323:55451483:C:T	54985810	54985810	0	4.55118e-10	-0.212385	0.0318294	FALSE
cg19583968	chr1	54980715	54980714	rs2433672:55443519:C:A	54977846	54977846	0	7.76183e-11	0.205523	0.0293389	FALSE
cg18384681	chr1	54996454	54996453	rs2249490:55456442:G:A	54990769	54990769	0	8.86486e-12	-0.170063	0.0229714	FALSE
cg01444643	chr1	55039176	55039175	rs41294827:55531528:G:T	55065855	55065855	0	4.63139e-11	0.385982	0.0543573	FALSE
cg14993491	chr1	55039299	55039298	rs35785163:55663826:AT:A	55198153	55198154	0	1.91711e-14	-0.510283	0.0601384	TRUE
cg05118916	chr1	55039391	55039390	rs35785163:55663826:AT:A	55198153	55198154	0	1.20733e-13	-0.451734	0.0553163	TRUE
cg26666107	chr1	55039401	55039400	rs287231:55664060:G:C	55198387	55198387	0	8.60646e-23	-0.564812	0.0484074	FALSE
cg14214659	chr1	55039417	55039416	rs287231:55664060:G:C	55198387	55198387	0	2.88263e-19	-0.45608	0.0440883	FALSE
cg25957967	chr1	55039476	55039475	rs35785163:55663826:AT:A	55198153	55198154	0	6.40565e-22	-0.613465	0.0540886	TRUE
cg09072162	chr1	55039508	55039507	rs41294827:55531528:G:T	55065855	55065855	0	3.18383e-28	1.36507	0.0996303	TRUE
cg17167852	chr1	55039517	55039516	rs41294827:55531528:G:T	55065855	55065855	0	7.38952e-11	1.00554	0.143357	FALSE
cg13191808	chr1	55039655	55039654	rs287231:55664060:G:C	55198387	55198387	0	1.097e-19	-0.766114	0.0729417	FALSE
cg08920610	chr1	55039671	55039670	rs372258159:55536362:GAGAAGAGAGGCTTTGACAGGGC:G	55070689	55070711	0	8.83323e-13	0.836715	0.107044	TRUE
cg14752245	chr1	55040205	55040204	rs41294827:55531528:G:T	55065855	55065855	0	1.75008e-09	1.49916	0.233742	TRUE
cg14752245	chr1	55040205	55040204	rs2479410:55505861:G:A	55040188	55040188	1	1.30143e-07	0.62412	0.112586	TRUE
cg19249107	chr1	55040282	55040281	rs372258159:55536362:GAGAAGAGAGGCTTTGACAGGGC:G	55070689	55070711	0	6.92068e-13	2.03803	0.259299	TRUE
cg17826594	chr1	55040342	55040341	rs41294827:55531528:G:T	55065855	55065855	0	2.23854e-11	1.64354	0.22718	FALSE
cg17826594	chr1	55040342	55040341	rs28385704:55506103:C:G	55040430	55040430	1	3.17803e-11	1.05499	0.147135	FALSE
cg14977608	chr1	55040840	55040839	rs287229:55659819:G:T	55194146	55194146	0	1.16936e-06	-0.261511	0.0516044	TRUE
cg20245116	chr1	55056341	55056340	rs2479418:55494877:A:G	55029204	55029204	0	8.58891e-14	-0.565527	0.0687513	FALSE
cg13462158	chr1	55056432	55056431	rs2986946:55489660:A:G	55023987	55023987	0	4.86372e-14	-0.617004	0.0741201	FALSE
cg07972572	chr1	203267942	203267941	rs55815277:203239394:TC:T	203270266	203270267	0	9.80059e-11	-0.179607	0.0257991	FALSE
cg19769827	chr1	203290645	203290644	rs144127998:203204479:A:G	203235351	203235351	0	2.53168e-08	-0.485682	0.0825606	FALSE
cg24337809	chr1	203305755	203305754	rs7534752:203279039:G:T	203309911	203309911	0	8.38969e-07	0.269048	0.0523304	FALSE
cg11914824	chr1	203351170	203351169	rs10800921:203359501:A:G	203390373	203390373	0	6.4711e-07	-0.182503	0.0351066	FALSE
cg21089380	chr1	203351532	203351531	rs9803837:203365456:A:G	203396328	203396328	0	7.51187e-08	-0.154865	0.0273675	FALSE
cg01739509	chr1	203351605	203351604	rs4971252:203320408:G:C	203351280	203351280	0	8.11585e-07	-0.147555	0.0286589	TRUE
cg14120338	chr1	203356684	203356683	rs10494841	203359612	203359612	0	2.63082e-09	0.358918	0.0566627	FALSE
cg21121209	chr1	203364414	203364413	rs10800924:203364019:A:C	203394891	203394891	0	2.11179e-07	-0.21022	0.0386376	FALSE
cg13242199	chr1	203440953	203440952	rs9803837:203365456:A:G	203396328	203396328	0	6.88894e-15	0.306605	0.0354018	FALSE
cg22704788	chr1	203475391	203475390	rs9803837:203365456:A:G	203396328	203396328	0	2.01692e-14	-0.281409	0.0331991	FALSE
cg05955301	chr1	203475409	203475408	rs78449289:203393045:G:A	203423917	203423917	0	8.84132e-07	0.161025	0.0313906	FALSE
cg16281776	chr1	203475551	203475550	rs9803837:203365456:A:G	203396328	203396328	0	5.65408e-11	-0.254527	0.036032	FALSE
cg11786870	chr1	203607354	203607353	rs72743674:203576607:A:G	203607479	203607479	0	3.8716e-08	-0.0965005	0.01665	FALSE
cg02244243	chr1	203661791	203661790	rs4951204:203590786:G:C	203621658	203621658	0	4.59234e-09	0.183626	0.0294988	TRUE
ch.1.3947147F	chr1	203724636	203724635	rs7533409:203674637:C:T	203705509	203705509	0	7.44619e-24	-0.457794	0.0379438	FALSE
cg07731392	chr1	203768845	203768844	rs67072942:203738036:C:T	203768908	203768908	0	1.61905e-12	0.258872	0.0335812	FALSE
cg23035341	chr1	203860354	203860353	rs5780200:203829005:A:AT	203859877	203859877	0	1.46968e-14	0.215184	0.0252243	FALSE
cg06642677	chr1	203860648	203860647	rs368189070:203828803:TCTC:T	203859675	203859678	0	5.73954e-20	0.594138	0.0560025	FALSE
cg15481791	chr1	203860763	203860762	rs5780200:203829005:A:AT	203859877	203859877	0	1.1397e-11	-0.224598	0.0305257	FALSE
cg11216917	chr1	204075382	204075381	rs78714973:204053926:G:GTTC	204084798	204084798	0	2.8439e-07	-0.222492	0.0413779	FALSE
cg07026666	chr1	204081253	204081252	rs113096683:204056113:C:T	204086985	204086985	0	1.61636e-08	-0.290352	0.0486049	TRUE
cg16674699	chr1	204179104	204179103	rs7513165:204147186:T:C	204178058	204178058	0	3.86654e-09	0.119675	0.0191211	FALSE
cg12731349	chr1	204190492	204190491	rs4951315:204157168:C:A	204188040	204188040	0	2.17319e-08	0.123484	0.0208808	FALSE
cg05606799	chr1	204196180	204196179	rs4534452:204185184:A:G	204216056	204216056	0	4.62543e-12	-0.159828	0.0212515	FALSE
cg00358936	chr1	204196476	204196475	rs6659692:204253206:G:A	204284078	204284078	0	7.83394e-14	-0.154305	0.0187225	FALSE
cg11968713	chr1	204196982	204196981	rs72749756:204175367:C:T	204206239	204206239	0	2.37799e-08	-0.20833	0.0353373	FALSE
cg00165862	chr1	204213933	204213932	rs4489623:204190576:C:T	204221448	204221448	0	6.23121e-12	0.166669	0.0223206	FALSE
cg07011373	chr1	204213970	204213969	rs4489623:204190576:C:T	204221448	204221448	0	7.27375e-07	0.0833328	0.0161097	FALSE
cg09462567	chr1	204214134	204214133	rs4489623:204190576:C:T	204221448	204221448	0	1.12748e-15	0.199466	0.0222405	FALSE
cg15962547	chr1	204214210	204214209	rs4489623:204190576:C:T	204221448	204221448	0	1.39713e-08	0.117271	0.0195351	FALSE
cg11053306	chr1	204214226	204214225	rs4489623:204190576:C:T	204221448	204221448	0	1.2426e-15	0.164772	0.0184058	FALSE
cg05807885	chr1	204214228	204214227	rs4489623:204190576:C:T	204221448	204221448	0	2.19477e-14	0.223924	0.0264628	FALSE
cg17906339	chr1	204214402	204214401	rs6675149:204233776:A:G	204264648	204264648	0	4.78823e-11	0.118324	0.0166779	FALSE
cg12210036	chr1	204214454	204214453	rs4631764:204190508:C:T	204221380	204221380	0	3.61097e-08	0.141627	0.0243758	FALSE
cg11871090	chr1	204292943	204292942	rs5780225:204262031:CTGTTAG:C	204292903	204292909	0	6.99419e-21	0.290849	0.0265548	TRUE
cg09850925	chr1	204305163	204305162	rs4078324:204264359:C:T	204295231	204295231	0	1.71035e-17	0.221005	0.0228531	FALSE
cg26787863	chr1	204317340	204317339	rs35245269:204280447:T:C	204311319	204311319	0	8.38085e-08	-0.134259	0.0238223	TRUE
cg20034980	chr1	204377807	204377806	rs10494854	204354746	204354746	0	1.18692e-06	-0.0794165	0.0156817	FALSE
cg20148187	chr1	204412125	204412124	rs5007570:204381238:G:T	204412110	204412110	0	4.42745e-10	0.296735	0.0444357	FALSE
cg10118093	chr1	204493728	204493727	rs10640159:204448441:C:CCTCT	204479313	204479313	0	1.26873e-09	-0.165207	0.0255106	TRUE
cg15097530	chr1	204517267	204517266	rs4252718:204512195:A:T	204543067	204543067	0	1.76715e-07	0.12874	0.023498	FALSE
cg12456798	chr1	204630426	204630425	rs10793713:204607235:A:G	204638107	204638107	0	7.47352e-09	0.116256	0.0189701	TRUE
cg02438943	chr1	204685892	204685891	rs2815827:204642444:G:T	204673316	204673316	0	3.71951e-08	-0.14414	0.0248343	FALSE
cg00485540	chr1	204711909	204711908	rs10900424:204681010:C:T	204711882	204711882	0	1.88549e-09	-0.325028	0.0507917	TRUE
cg06853424	chr1	204764101	204764100	1:204723593:A:AT	204754465	204754465	0	1.44963e-07	0.358045	0.0648548	TRUE
cg10189817	chr1	204983406	204983405	rs187733534:205522317:A:G	205553189	205553189	0	6.49445e-08	-0.508763	0.0894294	TRUE
cg09481780	chr1	204984678	204984677	rs2290138:204956325:G:C	204987197	204987197	0	2.65697e-41	-0.672147	0.0357329	FALSE
cg14957195	chr1	205003162	205003161	rs2802839:204972288:G:T	205003160	205003160	0	9.06606e-28	-0.502673	0.0371514	FALSE
cg01243924	chr1	205069658	205069657	rs2305275:205038731:C:T	205069603	205069603	0	1.22464e-15	0.181011	0.0202143	FALSE
cg00857998	chr1	205210852	205210851	1:205132347:A:AT	205163219	205163219	0	6.82458e-10	0.11684	0.0177158	TRUE
cg20414749	chr1	205212134	205212133	rs10900470:205168614:C:T	205199486	205199486	0	2.18355e-07	0.138769	0.0255387	FALSE
cg21728107	chr1	205247858	205247857	rs370647985:205216972:G:A	205247844	205247844	0	9.06052e-07	0.385548	0.0752389	TRUE
cg10768996	chr1	205266875	205266874	rs1172113:205226288:T:C	205257160	205257160	0	1.2339e-12	0.176734	0.0227832	FALSE
cg00142815	chr1	205269131	205269130	rs61823972:205201325:A:C	205232197	205232197	0	1.04554e-07	0.12072	0.0215974	FALSE
cg21545522	chr1	205269172	205269171	rs113241103:205268803:G:A	205299675	205299675	0	1.35947e-09	0.147551	0.0228312	FALSE
cg02716605	chr1	205269702	205269701	rs1668868:205240141:G:T	205271013	205271013	0	5.79378e-07	0.113217	0.0216775	TRUE
cg25393376	chr1	205275267	205275266	rs1668871	205268009	205268009	0	1.16486e-07	0.139732	0.0251006	FALSE
cg11170025	chr1	205275317	205275316	rs1668871	205268009	205268009	0	7.10465e-18	0.223612	0.0227794	FALSE
cg13459217	chr1	205357310	205357309	rs61823092:205295907:C:T	205326779	205326779	0	9.73067e-07	0.126405	0.0247442	TRUE
cg09662818	chr1	205357724	205357723	rs1857508:205327083:G:C	205357955	205357955	0	6.87753e-08	-0.163562	0.028811	TRUE
cg14392798	chr1	205473138	205473137	rs1109953	205473066	205473066	0	1.46758e-14	0.156163	0.0183052	FALSE
cg13935009	chr1	205528586	205528585	rs7531230:205498021:T:C	205528893	205528893	0	1.10974e-13	0.2027	0.0247768	FALSE
cg24337829	chr1	205548599	205548598	rs11240516:205520138:A:G	205551010	205551010	0	3.08045e-07	0.111378	0.0207799	TRUE
cg12481266	chr1	205592679	205592678	rs35117752:205561913:T:TC	205592785	205592785	0	1.98415e-22	0.419283	0.0363573	FALSE
cg00855731	chr1	205592779	205592778	rs35117752:205561913:T:TC	205592785	205592785	0	1.68013e-16	0.623168	0.0670844	FALSE
cg22307414	chr1	205632290	205632289	rs3088136:205601464:G:C	205632336	205632336	0	6.36894e-10	-0.117426	0.0177689	FALSE
cg26846380	chr1	205693738	205693737	rs6676110	205693849	205693849	0	7.35902e-08	0.123889	0.0218769	FALSE
cg23034840	chr1	205813395	205813394	rs56152218:205782509:C:T	205813381	205813381	0	3.4291e-22	0.244501	0.0213661	FALSE
cg03827427	chr1	205813882	205813881	rs823074:205774839:T:C	205805711	205805711	0	2.72997e-17	-0.251373	0.0262041	FALSE
cg13453750	chr1	205814262	205814261	rs1772143:205799987:T:A	205830859	205830859	0	1.50088e-16	-0.24504	0.0263251	FALSE
cg00822735	chr1	205842002	205842001	rs823154	205793278	205793278	0	1.78437e-11	-0.255121	0.0350634	FALSE
cg17178900	chr1	205849829	205849828	rs1772143:205799987:T:A	205830859	205830859	0	6.83818e-21	0.486478	0.0444009	FALSE
cg14159672	chr1	205850052	205850051	rs823080:205789282:G:A	205820154	205820154	0	5.70161e-31	1.25618	0.0852171	FALSE
cg14893161	chr1	205850124	205850123	rs823080:205789282:G:A	205820154	205820154	0	1.04731e-32	1.1714	0.0760407	FALSE
cg07533224	chr1	205850218	205850217	rs1772143:205799987:T:A	205830859	205830859	0	7.24058e-35	1.16661	0.0718319	FALSE
cg12898220	chr1	205850229	205850228	rs1772143:205799987:T:A	205830859	205830859	0	7.17506e-32	1.06042	0.0702988	FALSE
cg05841700	chr1	205850256	205850255	rs1772143:205799987:T:A	205830859	205830859	0	2.03747e-30	0.973236	0.0669785	FALSE
cg11965913	chr1	205850279	205850278	rs1772143:205799987:T:A	205830859	205830859	0	5.0863e-34	1.46677	0.0921813	FALSE
cg07167872	chr1	205850336	205850335	rs823074:205774839:T:C	205805711	205805711	0	1.55865e-30	0.7895	0.0541689	FALSE
cg24503407	chr1	205850365	205850364	rs823080:205789282:G:A	205820154	205820154	0	5.12931e-29	0.707973	0.0505688	FALSE
cg16334093	chr1	205850473	205850472	rs823074:205774839:T:C	205805711	205805711	0	1.92287e-26	0.485945	0.0372867	FALSE
cg07157834	chr1	205850482	205850481	rs1772143:205799987:T:A	205830859	205830859	0	5.07945e-23	0.343403	0.0292171	FALSE
cg16325770	chr1	205918954	205918953	rs12723666:205888529:G:A	205919401	205919401	0	6.01402e-07	0.25973	0.0498083	FALSE
cg25519352	chr1	205925781	205925780	rs11240595:205898828:G:T	205929700	205929700	0	1.09587e-08	0.266467	0.0440302	FALSE
cg09740935	chr1	205930487	205930486	rs7512462:205899595:T:C	205930467	205930467	0	2.75811e-20	0.179671	0.0167464	FALSE
cg17558126	chr1	206506918	206506917	rs3813976:206680303:C:T	206506970	206506970	0	6.74595e-13	0.118435	0.0150599	FALSE
cg19452316	chr1	206507634	206507633	rs2095124:206680983:A:C	206507650	206507650	0	7.0171e-18	0.259772	0.0264575	FALSE
cg26605225	chr1	206511587	206511586	rs61263066:206699602:A:AGTGTGTGTGTGTGTGT	206526269	206526269	0	9.39719e-10	0.145983	0.0223424	TRUE
cg06949439	chr1	206555707	206555706	rs6660116:206749181:C:G	206575854	206575854	0	1.18795e-09	-0.097721	0.0150601	FALSE
cg17220933	chr1	206556286	206556285	rs71633591:206730641:C:A	206557313	206557313	0	1.19907e-10	-0.12005	0.017338	FALSE
cg22871559	chr1	206556927	206556926	rs1962350:206735988:T:C	206562660	206562660	0	4.25026e-16	-0.199322	0.0218236	FALSE
cg19638572	chr1	206559812	206559811	rs4489558:206755867:A:G	206582535	206582535	0	2.44449e-07	-0.147709	0.0273052	TRUE
cg09535179	chr1	206583137	206583136	rs11119107:206767938:G:A	206594589	206594589	0	1.16865e-06	0.118163	0.0233168	FALSE
cg16639185	chr1	206612826	206612825	rs3813967:206786006:C:G	206612653	206612653	0	3.20148e-08	0.30871	0.0529083	FALSE
cg10336193	chr1	206675045	206675044	rs4074958:206848140:T:C	206674795	206674795	0	1.07905e-11	0.209727	0.0284661	FALSE
cg23576477	chr1	206714366	206714365	rs4077462:206910120:G:A	206736775	206736775	0	3.1163e-08	0.381738	0.0653625	TRUE
cg02669047	chr1	206757889	206757888	rs10494878:206915809:A:G	206742464	206742464	0	6.661e-07	-0.177294	0.0341464	FALSE
cg05245760	chr1	206922234	206922233	rs2629647:207176155:A:G	207002810	207002810	0	4.83678e-11	-0.176463	0.0248792	TRUE
cg25853486	chr1	206923365	206923364	rs291086:207097071:G:A	206923726	206923726	0	5.00275e-12	0.121809	0.0162268	FALSE
cg22511455	chr1	206923429	206923428	rs291084:207095623:C:G	206922278	206922278	0	6.82163e-22	0.312677	0.0275933	FALSE
cg22945467	chr1	206923489	206923488	rs291084:207095623:C:G	206922278	206922278	0	7.97119e-19	0.26636	0.0261715	FALSE
cg21179433	chr1	206946518	206946517	rs11119909:207129053:C:T	206955708	206955708	0	8.61831e-08	0.0936956	0.0166421	TRUE
cg23916516	chr1	206985526	206985525	rs71303063:207166539:C:CA	206993194	206993194	0	5.49261e-11	-0.196841	0.0278445	TRUE
cg10505247	chr1	207053131	207053130	rs77913112:206956844:G:A	206783499	206783499	0	8.97824e-07	-0.162222	0.0316448	TRUE
cg02152968	chr1	207320869	207320868	rs201017835:207503675:T:TA	207330330	207330330	0	3.99068e-08	-0.139586	0.0241098	FALSE
cg00797651	chr1	207320992	207320991	rs368073631:207459659:GAA:G	207286314	207286316	0	3.58721e-20	1.00222	0.0937883	FALSE
cg00797651	chr1	207320992	207320991	rs35683092:207484091:CT:C	207310746	207310747	1	2.73808e-08	0.695503	0.11855	TRUE
cg25771140	chr1	207321128	207321127	rs2782845:207474397:C:T	207301052	207301052	0	3.3025e-08	0.211092	0.0362176	TRUE
cg24065395	chr1	207321384	207321383	rs2782845:207474397:C:T	207301052	207301052	0	2.66594e-07	0.170618	0.0316489	TRUE
cg22078638	chr1	207322019	207322018	rs2782845:207474397:C:T	207301052	207301052	0	2.35772e-08	0.20189	0.0342347	TRUE
cg19825186	chr1	207322218	207322217	rs6660557:207454596:G:C	207281251	207281251	0	4.44919e-08	0.202277	0.0350735	TRUE
cg24727952	chr1	207466973	207466972	rs2661361	207404849	207404849	0	1.87181e-07	0.140517	0.0257051	TRUE
cg09557387	chr1	207645051	207645050	rs4437879:207875977:G:A	207702632	207702632	0	1.46078e-17	0.514008	0.0530078	FALSE
cg09232269	chr1	207673464	207673463	rs11118323:207848209:G:T	207674864	207674864	0	9.32021e-16	-0.190476	0.0211621	FALSE
cg21066685	chr1	207751032	207751031	rs1962149:207956559:G:A	207783214	207783214	0	4.5683e-09	-0.169045	0.0271518	FALSE
cg23729020	chr1	207751737	207751736	rs10449303:207961058:A:G	207787713	207787713	0	7.74743e-12	-0.236974	0.0319041	FALSE
cg22525895	chr1	207803698	207803697	rs76425939:207959134:T:A	207785789	207785789	0	2.83993e-07	-0.230661	0.0428947	FALSE
cg12875393	chr1	231200816	231200815	rs12028750	231126274	231126274	0	2.94507e-10	0.140022	0.0207281	FALSE
cg00022642	chr1	231241865	231241864	rs476210:231403046:T:A	231267300	231267300	0	3.71558e-12	0.105909	0.0140088	FALSE
cg26417172	chr1	231274596	231274595	rs480357:231380807:A:G	231245061	231245061	0	3.84136e-07	0.102309	0.0192593	FALSE
cg12189363	chr1	231393338	231393337	rs480902	231395881	231395881	0	3.37072e-25	0.450461	0.0358439	FALSE
cg20853591	chr1	231407733	231407732	rs2808616:231554993:C:G	231419247	231419247	0	2.65857e-09	-0.152449	0.024075	FALSE
cg23162821	chr1	231528427	231528426	rs1765782	231575743	231575743	0	5.90906e-18	-0.284343	0.0288764	FALSE
cg19193962	chr1	231528440	231528439	rs1765782	231575743	231575743	0	1.10707e-20	-0.761664	0.0700193	FALSE
cg21153881	chr1	231545350	231545349	rs201621042:231338033:A:T	231202287	231202287	0	9.9265e-08	-0.271753	0.0485233	TRUE
cg04892437	chr1	231602156	231602155	rs9651124:231736611:C:T	231600865	231600865	0	6.56606e-10	-0.301769	0.045704	FALSE
cg24499839	chr1	231626493	231626492	rs1094654:231796216:A:T	231660470	231660470	0	1.29122e-10	-0.115858	0.016766	FALSE
cg03987748	chr1	231626614	231626613	exm-rs12042938	231681096	231681096	0	3.69838e-22	-0.283157	0.0247707	FALSE
cg08838517	chr1	231626623	231626622	exm-rs12042938	231681096	231681096	0	6.7916e-20	-0.430814	0.0407136	FALSE
cg09305898	chr1	231626627	231626626	rs823158:231782650:C:T	231646904	231646904	0	1.08849e-25	-0.332635	0.0260872	FALSE
cg02530879	chr1	231809224	231809223	rs12735888:231944888:T:C	231809142	231809142	0	1.32317e-13	-0.208378	0.0255666	FALSE
cg09186051	chr1	231846161	231846160	rs4658953:231977773:T:C	231842027	231842027	0	2.84229e-08	0.198979	0.0339605	FALSE
cg10388113	chr1	231867075	231867074	rs76945478:231974202:T:G	231838456	231838456	0	8.1006e-14	0.56731	0.0688829	TRUE
cg24169009	chr1	231897577	231897576	rs4649395:232763275:G:T	232627529	232627529	0	2.42581e-08	0.927337	0.157404	TRUE
cg22312657	chr1	232110748	232110747	rs10864715:232243817:G:A	232108071	232108071	0	6.87039e-08	-0.112795	0.0198678	FALSE
cg09506761	chr1	232129517	232129516	rs138721202:232256415:G:A	232120669	232120669	0	6.21097e-10	-0.204155	0.0308703	FALSE
cg07591362	chr1	232142964	232142963	rs9660316:232253635:T:C	232117889	232117889	0	2.30293e-07	-0.171255	0.0315835	TRUE
cg08863976	chr1	232462532	232462531	rs12030201	232432841	232432841	0	2.96148e-14	0.252488	0.0300218	FALSE
ch.1.230766435F	chr1	232564067	232564066	rs1285672:232715237:A:T	232579491	232579491	0	4.53857e-08	0.104442	0.0181224	FALSE
cg12077889	chr1	232568168	232568167	rs368352108:232699880:GT:G	232564134	232564135	0	8.83518e-09	0.131354	0.0215512	TRUE
cg05864683	chr1	232599636	232599635	rs10752794:232735448:C:G	232599702	232599702	0	1.02836e-08	0.166756	0.0274964	FALSE
cg17444090	chr1	232599705	232599704	rs10752794:232735448:C:G	232599702	232599702	0	1.44384e-16	0.252233	0.027079	FALSE
cg07817055	chr1	232697118	232697117	rs112412529:233015693:C:T	232879947	232879947	0	1.90778e-32	-2.38865	0.156071	TRUE
cg06935979	chr1	232805961	232805960	rs1845789:232944569:C:T	232808823	232808823	0	6.84021e-14	-0.226159	0.0273626	FALSE
cg16056164	chr1	233075827	233075826	rs74147313:233381768:C:T	233246022	233246022	0	3.46889e-08	0.87267	0.149985	TRUE
cg01402634	chr1	233296107	233296106	rs1294334:233443525:G:T	233307779	233307779	0	7.73396e-17	0.226597	0.024057	FALSE
cg12669731	chr1	233599097	233599096	rs61527499:233733241:G:A	233597495	233597495	0	9.01903e-14	-0.399797	0.0486538	FALSE
cg06895196	chr1	233599853	233599852	rs61527499:233733241:G:A	233597495	233597495	0	1.16368e-13	-0.381152	0.0466367	FALSE
cg18115428	chr1	233904233	233904232	rs12091762:234019703:C:A	233883957	233883957	0	3.83793e-07	0.148423	0.0279389	FALSE
cg10878114	chr1	233904300	233904299	rs1937257:234034336:C:T	233898590	233898590	0	3.01686e-10	0.163385	0.024203	FALSE
cg05051043	chr1	233905020	233905019	rs10910308	233904111	233904111	0	2.07446e-11	0.273528	0.0377361	FALSE
cg05449874	chr1	234140267	234140266	rs12059433:234259825:G:A	234124079	234124079	0	5.15498e-12	-0.207723	0.0276917	TRUE
cg09674468	chr1	234164554	234164553	rs4261174:234205662:T:C	234069916	234069916	0	2.07329e-10	0.264446	0.0387671	FALSE
cg10467711	chr1	234214582	234214581	rs4623775	234003835	234003835	0	1.40498e-08	-0.31248	0.0520628	TRUE
cg09811123	chr1	234214657	234214656	rs4623775	234003835	234003835	0	7.36772e-17	-0.444028	0.0471002	FALSE
cg10204807	chr1	234214770	234214769	rs4623775	234003835	234003835	0	1.11862e-13	-0.36621	0.0447707	FALSE
cg01420001	chr1	234229795	234229794	rs4623775	234003835	234003835	0	3.24679e-07	-0.322707	0.0603355	FALSE
cg26642082	chr1	234372602	234372601	rs73099929:234508535:C:T	234372789	234372789	0	7.9756e-09	0.251702	0.0411587	FALSE
cg04205689	chr1	234372746	234372745	rs149229387:234503118:GCTCTCTCTCTCTCTGT:G	234367372	234367388	0	1.49168e-08	0.253465	0.0423153	TRUE
cg08166961	chr1	234377553	234377552	rs6659527:234503848:A:G	234368102	234368102	0	9.35874e-07	0.0920792	0.0179943	TRUE
cg04905373	chr1	234435870	234435869	rs443685:234563060:T:C	234427314	234427314	0	3.18685e-07	0.146114	0.0272978	TRUE
cg17707347	chr1	234479222	234479221	rs271744:234623253:C:T	234487507	234487507	0	4.80641e-13	-0.250206	0.0315752	TRUE
cg03802191	chr1	234479424	234479423	rs150138392:234622577:AAG:A	234486831	234486833	0	5.24137e-25	-0.292175	0.0233822	FALSE
cg11137277	chr1	234479491	234479490	rs271744:234623253:C:T	234487507	234487507	0	1.08964e-17	-0.32728	0.0335827	FALSE
cg24050135	chr1	234523802	234523801	rs509235:234660054:A:G	234524308	234524308	0	1.6215e-07	-0.0924836	0.0168244	TRUE
cg13023668	chr1	234532621	234532620	rs271764:234673273:A:G	234537527	234537527	0	2.17758e-08	0.113463	0.0191875	FALSE
cg05990710	chr1	234544709	234544708	rs271761:234683129:C:T	234547383	234547383	0	1.09087e-17	0.223905	0.0229757	FALSE
cg10714509	chr1	234544766	234544765	rs271761:234683129:C:T	234547383	234547383	0	2.48851e-18	0.280074	0.0280358	FALSE
cg22176787	chr1	234600508	234600507	rs11581076:234725135:C:T	234589389	234589389	0	7.77372e-11	0.258112	0.0368474	FALSE
cg08464385	chr1	234944427	234944426	rs61837293:235076094:C:T	234940347	234940347	0	1.20768e-07	0.155038	0.0278883	FALSE
cg25368836	chr1	235299012	235299011	rs72756075:235397118:C:T	235233803	235233803	0	1.0102e-28	0.444627	0.0320126	FALSE
cg02985240	chr1	235304834	235304833	rs144647926:235467607:G:A	235304292	235304292	0	1.3836e-21	0.678961	0.0605316	FALSE
cg07794221	chr1	235411925	235411924	rs11449267:235540971:C:CT	235377656	235377656	0	2.56907e-19	0.346557	0.0334399	TRUE
cg19879264	chr1	235504682	235504681	rs291348:235667690:A:G	235504390	235504390	0	3.38284e-07	0.0622837	0.0116643	FALSE
cg17500055	chr1	235642261	235642260	rs10926341:235806794:A:G	235643494	235643494	0	1.09927e-09	-0.161689	0.0248611	TRUE
cg00652727	chr1	235648899	235648898	rs7521258:235811422:G:C	235648122	235648122	0	7.48815e-08	-0.18938	0.0334631	FALSE
cg19456318	chr1	235831531	235831530	rs3820555	235831567	235831567	0	6.27193e-14	-0.329377	0.0397784	TRUE
cg13677741	chr1	235867797	235867796	rs7541057:235860340:C:T	235697040	235697040	0	4.24277e-10	-0.465272	0.0695895	FALSE
cg17231522	chr1	235869746	235869745	rs1885253:236087324:C:T	235924024	235924024	0	3.41513e-08	-0.174532	0.0299802	FALSE
cg18837946	chr1	235914278	235914277	rs4660124:236072010:A:G	235908710	235908710	0	6.23813e-07	0.189379	0.0363731	FALSE
cg25310490	chr1	235946576	235946575	rs10495368:236120736:A:G	235957436	235957436	0	1.9801e-08	-0.221407	0.03732	FALSE
cg00874055	chr1	236143374	236143373	rs4006577:236301301:G:A	236138001	236138001	0	1.96404e-10	0.213022	0.0311819	FALSE
cg10981580	chr1	236143468	236143467	rs4006577:236301301:G:A	236138001	236138001	0	2.58722e-10	0.167978	0.0247767	FALSE
cg26604618	chr1	236287922	236287921	rs149271619:236448765:G:GC	236285465	236285465	0	6.4452e-19	-0.309301	0.0302866	TRUE
cg03880814	chr1	236347747	236347746	rs10218731:236488103:C:T	236324803	236324803	0	3.27869e-20	-1.00181	0.0936214	FALSE
cg18507290	chr1	236517083	236517082	rs147563958:236675576:C:CCTTTT	236512276	236512276	0	9.72999e-12	-0.396471	0.0536759	TRUE
cg23319037	chr1	236550297	236550296	rs12744425:236702447:T:G	236539147	236539147	0	6.78928e-08	0.119144	0.020977	FALSE
cg25160036	chr1	236604551	236604550	rs2853624:236763572:T:G	236600272	236600272	0	1.14606e-08	0.0839825	0.0138976	FALSE
cg00907549	chr1	236605067	236605066	rs1041936:236702209:C:T	236538909	236538909	0	6.96415e-07	-0.107202	0.0206858	FALSE
cg21218544	chr1	236795231	236795230	rs10925266:237068826:T:G	236905526	236905526	0	5.14098e-13	0.350607	0.0443118	TRUE
cg20601412	chr1	237005371	237005370	rs17611358:237168736:G:A	237005436	237005436	0	1.01819e-13	-0.270529	0.0330071	FALSE
cg18217832	chr1	237032367	237032366	rs12126370:237202166:G:A	237038866	237038866	0	3.07205e-12	-0.173025	0.0227835	FALSE
cg26502447	chr1	237115367	237115366	rs11810113	237114849	237114849	0	2.54453e-18	0.243903	0.024424	FALSE
cg08278466	chr1	237760804	237760803	rs6143694:237924114:C:CAATGAATGGAGACATGT	237760814	237760814	0	4.07202e-23	-0.34009	0.0288472	TRUE
cg17514199	chr1	237888152	237888151	rs3835532:238051188:T:TA	237887888	237887888	0	4.48885e-12	0.284857	0.0378487	TRUE
cg26716099	chr1	238336653	238336652	rs10754631:238501664:G:T	238338364	238338364	0	1.50713e-29	0.93661	0.0659529	FALSE
cg13865695	chr1	238474804	238474803	rs2039993:238642631:T:G	238479331	238479331	0	2.00092e-09	-0.289161	0.0452685	TRUE
cg15560047	chr1	238475419	238475418	rs1557131:238644290:T:C	238480990	238480990	0	5.55428e-21	-0.477695	0.0434649	FALSE
cg13285289	chr1	238558396	238558395	rs7516101:238725567:T:C	238562267	238562267	0	1.56569e-23	-0.494643	0.0414119	FALSE
cg03324695	chr1	238952129	238952128	rs1915269:239085483:T:C	238922183	238922183	0	1.07922e-08	0.186946	0.0308747	TRUE
cg01567173	chr1	239955051	239955050	rs6693510:240118752:A:G	239955452	239955452	0	7.09393e-24	0.484665	0.0401449	FALSE
cg15748490	chr1	240091661	240091660	rs1418049	240090020	240090020	0	2.41119e-08	-0.0973804	0.0165257	FALSE
cg00816406	chr1	240123327	240123326	rs6698474:240295364:G:A	240132064	240132064	0	1.49635e-07	0.134836	0.0244534	FALSE
cg26291133	chr1	240150447	240150446	rs723574:240317238:C:A	240153938	240153938	0	3.69072e-09	0.169165	0.0269889	FALSE
cg07418387	chr1	240212165	240212164	rs35339684:240398891:T:A	240235591	240235591	0	6.72752e-08	0.138028	0.0242935	TRUE
cg09373171	chr1	240337928	240337927	rs12406544:240503031:C:A	240339731	240339731	0	5.00107e-10	0.216391	0.0325173	FALSE
cg13357518	chr1	21936855	21936854	rs12033039:22257202:G:T	21930709	21930709	0	1.39723e-24	-0.369877	0.0299823	FALSE
cg13108653	chr1	21937997	21937996	rs9426781:22244592:C:T	21918099	21918099	0	2.91642e-07	-0.159617	0.0297147	FALSE
cg01110790	chr1	21961434	21961433	rs10917088:22304712:A:G	21978219	21978219	0	1.55776e-07	0.1308	0.023758	TRUE
cg26015888	chr1	22025611	22025610	rs12097709:22347138:C:T	22020645	22020645	0	2.46335e-08	-0.0987301	0.0167671	FALSE
cg07180649	chr1	22143798	22143797	rs12404660:22458794:A:G	22132301	22132301	0	5.7814e-09	0.144577	0.0233969	FALSE
cg21030858	chr1	22184905	22184904	rs10737465:22503776:T:C	22177283	22177283	0	1.16621e-09	-0.147664	0.0227445	TRUE
cg07090424	chr1	22208999	22208998	rs2807323:22559930:T:C	22233437	22233437	0	5.90617e-08	-0.14579	0.0255382	TRUE
cg14474618	chr1	22210369	22210368	rs2744740:22563105:C:T	22236612	22236612	0	2.13313e-08	-0.241899	0.0408781	FALSE
cg16885277	chr1	22212429	22212428	rs34904260:22564243:GA:G	22237750	22237751	0	1.07211e-07	-0.135588	0.0242803	TRUE
cg14764745	chr1	22212715	22212714	rs1569581:22547089:A:G	22220596	22220596	0	1.52282e-16	0.492546	0.052929	TRUE
cg17841765	chr1	22234207	22234206	rs2807325:22563153:G:A	22236660	22236660	0	1.52902e-11	-0.177329	0.0242778	FALSE
cg11383918	chr1	22236430	22236429	rs2807326:22563493:G:A	22237000	22237000	0	7.11806e-20	-0.338168	0.0319814	FALSE
cg12942052	chr1	22236631	22236630	rs2807325:22563153:G:A	22236660	22236660	0	7.07063e-08	-0.131481	0.0231834	TRUE
cg18199866	chr1	22289659	22289658	rs1980473:22616583:G:A	22290090	22290090	0	4.9786e-10	-0.270414	0.0406301	FALSE
cg13827179	chr1	22342147	22342146	rs4655051:22674007:G:A	22347514	22347514	0	2.84078e-13	-0.218388	0.0272417	FALSE
cg00724947	chr1	22391784	22391783	rs6704135	22391768	22391768	0	2.39016e-08	0.125293	0.0212562	FALSE
cg24834590	chr1	22448028	22448027	rs112912518:22773295:G:GA	22446802	22446802	0	1.93022e-09	-0.116718	0.0182524	TRUE
cg14851608	chr1	22450774	22450773	rs1890775	22447773	22447773	0	3.37332e-20	-0.212794	0.0198946	FALSE
cg17728472	chr1	22450816	22450815	rs1890775	22447773	22447773	0	6.35129e-22	-0.218907	0.0192984	FALSE
cg26870337	chr1	22451180	22451179	rs1890775	22447773	22447773	0	1.69919e-07	-0.130722	0.0238236	FALSE
cg21415347	chr1	22451347	22451346	rs1890775	22447773	22447773	0	8.5088e-16	-0.290709	0.0322429	FALSE
cg11847808	chr1	22563119	22563118	rs209741	22572518	22572518	0	3.44358e-09	-0.219233	0.0349011	FALSE
cg05941864	chr1	22567486	22567485	rs66713995:22913274:G:GGGGT	22586781	22586781	0	1.82068e-14	-0.455512	0.0536273	TRUE
cg13795941	chr1	22584288	22584287	rs209751:22893908:C:G	22567415	22567415	0	1.47389e-12	-0.281955	0.0364963	FALSE
cg27136384	chr1	22585057	22585056	rs649754	22579754	22579754	0	1.83843e-16	0.20882	0.0225162	FALSE
cg11721177	chr1	22593381	22593380	rs209696:22919904:C:T	22593411	22593411	0	8.60494e-09	0.14204	0.0232842	FALSE
cg05269784	chr1	22593677	22593676	rs209696:22919904:C:T	22593411	22593411	0	2.81367e-09	0.153593	0.0242982	FALSE
cg15399505	chr1	22636372	22636371	rs292001:22964958:G:A	22638465	22638465	0	1.3034e-10	-0.192655	0.0278866	TRUE
cg26928911	chr1	22642500	22642499	rs682658:22968815:G:T	22642322	22642322	0	2.3935e-07	-0.096308	0.0177885	TRUE
cg01740960	chr1	22642517	22642516	rs623607:22986716:T:A	22660223	22660223	0	3.64424e-08	-0.11171	0.0192329	FALSE
cg11610429	chr1	22704828	22704827	rs6687402:23031406:G:A	22704913	22704913	0	2.04641e-15	0.326384	0.0368065	FALSE
cg25682112	chr1	22739916	22739915	rs72653640:23067241:C:T	22740748	22740748	0	7.03593e-08	-0.171617	0.030255	TRUE
cg19818699	chr1	22800235	22800234	rs2582016:23122360:G:A	22795867	22795867	0	1.30895e-11	0.205411	0.0280138	FALSE
cg01502535	chr1	22841596	22841595	rs4655117:23137631:C:T	22811138	22811138	0	1.48571e-14	0.212208	0.0248808	FALSE
cg16262774	chr1	22888618	22888617	rs12046210:23211843:G:A	22885350	22885350	0	1.1773e-06	-0.118461	0.0233831	TRUE
cg18137921	chr1	22964426	22964425	rs925826:23291090:A:G	22964597	22964597	0	3.01196e-16	0.261229	0.0284214	FALSE
cg04163048	chr1	22964838	22964837	rs925826:23291090:A:G	22964597	22964597	0	6.79864e-13	0.225557	0.0286862	TRUE
cg24550515	chr1	23033823	23033822	rs3972269:23334295:A:AAAAT	23007802	23007802	0	8.01049e-20	-0.374083	0.0354427	TRUE
cg01439649	chr1	23084216	23084215	rs58815269:23339362:CTT:C	23012869	23012871	0	1.19836e-06	0.198885	0.0392888	TRUE
cg00023024	chr1	23194780	23194779	rs667329:23515256:C:T	23188763	23188763	0	2.73933e-29	-1.02387	0.0725992	FALSE
cg11953164	chr1	23194815	23194814	rs2746559:23524846:G:A	23198353	23198353	0	1.78605e-32	-1.3711	0.0895217	FALSE
cg21947136	chr1	23194817	23194816	rs667329:23515256:C:T	23188763	23188763	0	4.89432e-26	-0.933926	0.0725056	FALSE
cg20678835	chr1	23194840	23194839	rs667329:23515256:C:T	23188763	23188763	0	3.24514e-33	-1.29854	0.0832357	FALSE
cg08872493	chr1	23194925	23194924	rs2746559:23524846:G:A	23198353	23198353	0	1.22283e-31	-1.21253	0.0808574	FALSE
cg19743168	chr1	23218503	23218502	rs7414010:23543929:T:C	23217436	23217436	0	3.33863e-16	0.397933	0.0433763	FALSE
cg16430505	chr1	23225363	23225362	rs7535481:23546399:T:C	23219906	23219906	0	3.35687e-15	0.262357	0.0298696	FALSE
cg07645741	chr1	23273541	23273540	rs148433388:24538874:T:C	24212384	24212384	0	1.1024e-06	0.175892	0.0346193	TRUE
cg22502492	chr1	23371014	23371013	rs61777147:23715696:T:C	23389203	23389203	0	5.88523e-10	-0.188079	0.0283953	TRUE
cg07736389	chr1	23424642	23424641	rs74706087:23829799:C:T	23503307	23503307	0	3.36586e-08	0.296468	0.0508997	TRUE
cg15040770	chr1	23425441	23425440	rs7534474:23773851:A:G	23447358	23447358	0	1.43869e-08	-0.221637	0.0369567	FALSE
cg22040403	chr1	23531525	23531524	rs2742976:23858002:T:G	23531510	23531510	0	2.24736e-14	0.277114	0.0327644	FALSE
cg26847678	chr1	23559823	23559822	rs2811946	23575926	23575926	0	1.30178e-07	-0.135614	0.0244638	FALSE
cg08540100	chr1	23562497	23562496	rs10917395	23577855	23577855	0	4.4543e-11	0.121945	0.0171559	FALSE
cg06867363	chr1	23567901	23567900	rs6700851:23889725:T:G	23563235	23563235	0	1.23918e-07	0.0984824	0.0177323	TRUE
cg25141417	chr1	23619885	23619884	rs34004603:23949067:G:A	23622577	23622577	0	7.5005e-10	0.130238	0.0198015	FALSE
cg07960470	chr1	23722735	23722734	rs658387:24043445:A:G	23716955	23716955	0	1.38647e-12	0.178045	0.0230137	FALSE
cg24699146	chr1	23826090	23826089	rs11588187:24145047:T:A	23818557	23818557	0	3.23071e-08	0.198125	0.0339666	FALSE
cg18888403	chr1	23826285	23826284	rs12121387:24166536:T:G	23840046	23840046	0	4.20945e-08	-0.149462	0.0258646	FALSE
cg15997130	chr1	23838714	23838713	rs61380582:24142578:AT:A	23816088	23816089	0	1.02435e-13	0.194424	0.0237247	FALSE
cg10205764	chr1	23838739	23838738	rs61380582:24142578:AT:A	23816088	23816089	0	9.84075e-20	-0.210705	0.0200273	TRUE
cg07813615	chr1	23840020	23840019	rs11588187:24145047:T:A	23818557	23818557	0	6.0223e-13	0.254294	0.032253	TRUE
cg26873754	chr1	23867239	23867238	exm31606	23868283	23868283	0	1.37307e-09	-0.185235	0.0286708	FALSE
cg12626384	chr1	23868476	23868475	rs2070954:24194788:A:G	23868298	23868298	0	8.2107e-10	0.193356	0.0294758	TRUE
cg07568418	chr1	23868485	23868484	rs2070954:24194788:A:G	23868298	23868298	0	2.21916e-20	0.920466	0.08551	FALSE
cg12084952	chr1	23868490	23868489	rs143150363:24190106:C:G	23863616	23863616	0	5.24741e-25	0.685856	0.0548886	FALSE
cg05560725	chr1	23868500	23868499	rs2070953:24194862:A:C	23868372	23868372	0	9.37886e-10	0.205068	0.0313834	FALSE
cg19367136	chr1	23868570	23868569	rs201252026:24187137:C:CT	23860647	23860647	0	1.86932e-14	0.277872	0.0327313	FALSE
cg24792360	chr1	23868654	23868653	exm31621	23874672	23874672	0	7.28198e-27	0.509095	0.038595	FALSE
cg22077361	chr1	23868858	23868857	exm31621	23874672	23874672	0	3.5406e-22	0.605521	0.0529385	FALSE
cg10953003	chr1	23868980	23868979	exm31621	23874672	23874672	0	1.53503e-26	0.513569	0.0392958	FALSE
cg22614927	chr1	23869098	23869097	exm31621	23874672	23874672	0	4.48744e-15	0.245046	0.0280568	FALSE
cg04160030	chr1	23869170	23869169	rs12404321:24175763:A:G	23849273	23849273	0	2.57264e-11	0.399773	0.0554545	FALSE
cg01586797	chr1	23896763	23896762	rs34698652:24217235:CA:C	23890745	23890746	0	3.10907e-14	0.299134	0.0356037	TRUE
cg16873748	chr1	23903609	23903608	rs55963374:24221253:C:T	23894763	23894763	0	2.6352e-09	0.195553	0.0308737	TRUE
cg12569845	chr1	23951502	23951501	rs75910560:24322001:A:C	23995511	23995511	0	6.13102e-09	0.168463	0.0273137	TRUE
cg03384426	chr1	23958785	23958784	rs114172431:24286885:A:G	23960395	23960395	0	1.59754e-13	-0.348789	0.0429677	TRUE
cg27409662	chr1	23959053	23959052	rs140748141:24307980:GAA:G	23981490	23981492	0	1.43784e-17	0.283733	0.0292524	TRUE
cg00693915	chr1	23963610	23963609	rs72540327:24288476:T:C	23961986	23961986	0	1.53233e-07	-0.206162	0.0374228	TRUE
cg22358066	chr1	23970362	23970361	rs140748141:24307980:GAA:G	23981490	23981492	0	4.71794e-16	0.177171	0.0194357	TRUE
cg16924704	chr1	23980774	23980773	rs75910560:24322001:A:C	23995511	23995511	0	2.80217e-14	0.269164	0.0319683	TRUE
cg04021497	chr1	23980802	23980801	rs72540327:24288476:T:C	23961986	23961986	0	1.20192e-17	0.388368	0.0399177	TRUE
cg19079605	chr1	24009304	24009303	1:24275460:A:AT	23948970	23948970	0	9.45713e-09	0.498528	0.0819757	TRUE
cg14817175	chr1	24084268	24084267	rs6669996:24403004:T:C	24076514	24076514	0	1.46285e-11	-0.22069	0.030181	TRUE
cg18341045	chr1	24126513	24126512	rs2502451:24468431:G:C	24141941	24141941	0	8.71278e-09	-0.161241	0.0264426	FALSE
cg17246694	chr1	24154358	24154357	rs7532647:24481351:T:C	24154861	24154861	0	1.82005e-10	-0.266284	0.0388968	FALSE
cg06296752	chr1	24155850	24155849	rs140922177:24086810:T:C	23760320	23760320	0	1.6528e-16	-1.63346	0.175791	TRUE
cg26835312	chr1	24186984	24186983	rs12094257:24513608:C:T	24187118	24187118	0	7.08945e-07	0.166179	0.0320904	FALSE
cg08700651	chr1	24186993	24186992	rs12094257:24513608:C:T	24187118	24187118	0	9.00204e-08	0.148879	0.0264866	FALSE
cg27042782	chr1	24291476	24291475	rs7542749:24622610:C:T	24296120	24296120	0	3.60589e-11	0.152408	0.0213248	TRUE
cg15050111	chr1	24319361	24319360	rs12045977:24641759:A:G	24315269	24315269	0	1.20153e-07	0.0783375	0.0140886	FALSE
cg23820945	chr1	24319533	24319532	rs5773084:24642835:GA:G	24316345	24316346	0	6.26468e-08	0.0959231	0.016839	TRUE
cg01119512	chr1	24319716	24319715	rs12045977:24641759:A:G	24315269	24315269	0	4.48557e-08	0.0851562	0.0147698	FALSE
cg04238498	chr1	24329661	24329660	rs557811:24655384:T:C	24328894	24328894	0	4.06906e-19	0.366304	0.0356047	TRUE
cg21857251	chr1	24337318	24337317	rs11381974:24867808:T:TA	24541318	24541318	0	5.85863e-09	-0.378924	0.0613472	TRUE
cg25108531	chr1	24340481	24340480	rs35628511:24667702:C:T	24341212	24341212	0	8.03918e-16	-0.291475	0.0322935	FALSE
cg21531089	chr1	24392180	24392179	rs195720:24787947:A:G	24461457	24461457	0	1.03177e-06	-0.133831	0.0262646	FALSE
cg21686600	chr1	24393220	24393219	exm32381	24391589	24391589	0	2.12079e-16	-0.287317	0.0310605	FALSE
cg11081247	chr1	24415127	24415126	rs34975098:24763135:C:T	24436645	24436645	0	2.52166e-09	-0.149823	0.0236218	FALSE
cg10150518	chr1	24415188	24415187	rs144796893:24728916:ATCT:A	24402426	24402429	0	5.47594e-10	0.198064	0.0298408	TRUE
cg21298759	chr1	24415234	24415233	rs144796893:24728916:ATCT:A	24402426	24402429	0	5.04432e-11	0.215395	0.0304014	FALSE
cg18323236	chr1	24416540	24416539	rs4648987:24765522:G:A	24439032	24439032	0	2.28368e-11	0.189547	0.0262136	FALSE
cg00917251	chr1	24503498	24503497	rs195707:24814904:A:C	24488414	24488414	0	7.56197e-23	-0.302517	0.0258807	FALSE
cg08518475	chr1	24506127	24506126	rs195707:24814904:A:C	24488414	24488414	0	2.29586e-22	-0.35264	0.0306415	FALSE
cg04095045	chr1	24555709	24555708	rs6667854:24889994:C:A	24563503	24563503	0	5.02967e-07	0.100522	0.0191337	TRUE
cg21531925	chr1	24555912	24555911	rs4648995:24899348:A:G	24572857	24572857	0	2.63621e-17	0.165392	0.0172307	FALSE
cg09568594	chr1	24555950	24555949	rs1929302:24895051:A:G	24568560	24568560	0	8.20587e-13	0.120381	0.0153751	FALSE
cg20433521	chr1	24556501	24556500	rs6657703:24908625:A:C	24582134	24582134	0	4.97898e-07	-0.0999476	0.0190164	TRUE
cg17273683	chr1	24595241	24595240	rs146782244:24917553:AG:A	24591062	24591063	0	2.05259e-10	0.348468	0.0510704	TRUE
cg09874213	chr1	24641862	24641861	rs4649004:24946754:T:C	24620263	24620263	0	2.35548e-11	-0.145427	0.0201278	FALSE
cg05446908	chr1	24730554	24730553	rs142838832:25076811:TGGTA:T	24750320	24750324	0	5.63705e-07	-0.144209	0.02758	TRUE
cg10522447	chr1	24744770	24744769	rs3029333:25049690:A:T	24723199	24723199	0	5.78977e-09	-0.210681	0.034096	TRUE
cg21141264	chr1	24862421	24862420	rs2056956:25192559:A:G	24866068	24866068	0	2.88436e-07	-0.139925	0.0260372	TRUE
cg17258765	chr1	24876127	24876126	rs3116869:25198182:C:T	24871691	24871691	0	2.84204e-14	-0.200115	0.0237743	FALSE
cg20674490	chr1	24914442	24914441	rs2282719:25241090:A:C	24914599	24914599	0	6.88246e-08	-0.105489	0.0185821	FALSE
cg04907595	chr1	24931774	24931773	rs1005733:25261960:T:A	24935469	24935469	0	1.07058e-07	0.154556	0.0276754	FALSE
cg23273869	chr1	24970404	24970403	rs373993301:25294548:CTT:C	24968057	24968059	0	2.16682e-23	-0.260946	0.0219435	FALSE
cg14191459	chr1	25045773	25045772	rs149293740:24923019:C:T	24596528	24596528	0	2.83687e-08	-0.361208	0.0616445	TRUE
cg03920750	chr1	25051200	25051199	rs416365:25350186:G:C	25023695	25023695	0	2.976e-07	0.171336	0.0319221	TRUE
cg11922616	chr1	25148421	25148420	rs143646285:25474911:C:T	25148420	25148420	0	1.16531e-44	-4.21038	0.208345	TRUE
cg06678733	chr1	25248418	25248417	1:25689406:A:G	25362915	25362915	0	6.64573e-18	0.235174	0.0239303	FALSE
cg21826606	chr1	25266565	25266564	1:25689406:A:G	25362915	25362915	0	2.42134e-24	1.27123	0.103797	TRUE
cg25951697	chr1	25268017	25268016	1:25689406:A:G	25362915	25362915	0	4.4085e-22	1.77256	0.155452	TRUE
cg15741663	chr1	25320452	25320451	rs55794721:25561667:G:A	25235176	25235176	0	6.72781e-10	-0.336884	0.0510584	TRUE
cg13386331	chr1	25462005	25462004	rs34596921:25773708:T:TA	25447217	25447217	0	2.21131e-13	0.343029	0.0425563	TRUE
cg12211490	chr1	25501938	25501937	rs61775180:25793663:C:T	25467172	25467172	0	5.61128e-11	0.123193	0.0174362	FALSE
cg03362483	chr1	25520198	25520197	rs71577781:25852629:ATTGTTG:A	25526138	25526144	0	1.17172e-16	-0.278027	0.0297365	TRUE
cg21452808	chr1	25573645	25573644	Ancestry_EUROPE_Cluster124_chr1_25900215	25573724	25573724	0	9.68777e-09	-0.116355	0.0191481	FALSE
cg03257180	chr1	25700255	25700254	rs184471698:26026746:G:A	25700255	25700255	0	7.03552e-21	-1.20723	0.110231	TRUE
cg07424646	chr1	25704511	25704510	rs2744784:26030613:G:A	25704122	25704122	0	7.24848e-31	-0.811249	0.0551824	FALSE
cg04980428	chr1	25771724	25771723	rs139360922:26094137:T:TC	25767646	25767646	0	2.5838e-11	-0.185253	0.0257002	TRUE
cg16417374	chr1	25771820	25771819	rs149459496:26094257:A:AC	25767766	25767766	0	1.91442e-09	-0.139604	0.0218258	FALSE
cg14888636	chr1	25772041	25772040	rs71014387:26088937:CT:C	25762446	25762447	0	9.85781e-10	-0.165515	0.0253674	TRUE
cg15131146	chr1	25775265	25775264	rs2280998:26108578:G:A	25782087	25782087	0	1.76147e-09	0.104878	0.0163553	TRUE
cg09149784	chr1	25797368	25797367	rs7524771:26126375:A:G	25799884	25799884	0	7.23999e-13	-0.22634	0.0288266	FALSE
cg05887270	chr1	25803137	25803136	rs71577800:26123587:A:ATGTG	25797096	25797096	0	3.71874e-11	0.188318	0.0263703	FALSE
cg22189070	chr1	25819926	25819925	rs7364588:26182863:A:C	25856372	25856372	0	7.155e-33	-0.418075	0.0270274	FALSE
cg24596570	chr1	25819973	25819972	rs2280997:26135741:C:G	25809250	25809250	0	1.17682e-16	0.338882	0.036248	FALSE
cg06840154	chr1	25823264	25823263	rs55654329:26199000:ATT:A	25872509	25872511	0	9.96441e-10	-0.118456	0.0181607	TRUE
cg02900990	chr1	162021823	162021822	rs10918514:161996614:C:A	162026824	162026824	0	7.65922e-07	0.314274	0.0608887	TRUE
cg10810183	chr1	162024198	162024197	rs4657136:161994010:G:T	162024220	162024220	0	2.35976e-17	0.245851	0.0255638	FALSE
cg11169640	chr1	162362712	162362711	rs56123469:162341286:T:TAA	162371496	162371496	0	4.99855e-14	0.591428	0.0710881	TRUE
cg13092735	chr1	162382696	162382695	rs2655731:162363891:T:C	162394101	162394101	0	7.80559e-09	-0.106457	0.0173957	FALSE
cg24807394	chr1	162488370	162488369	rs61811791:162504856:C:T	162535066	162535066	0	3.21721e-07	-0.150109	0.0280549	TRUE
cg19814518	chr1	162497291	162497290	rs10919549:162467014:C:G	162497224	162497224	0	2.21695e-30	-0.692907	0.0477319	FALSE
cg22657016	chr1	162497326	162497325	rs6667797:162469091:G:A	162499301	162499301	0	3.37624e-29	-0.408419	0.0290302	FALSE
cg10967587	chr1	162497391	162497390	rs10128062:162477383:C:T	162507593	162507593	0	3.15147e-24	-0.345926	0.0283441	FALSE
cg00859178	chr1	162497419	162497418	rs10919549:162467014:C:G	162497224	162497224	0	2.02351e-32	-0.636811	0.0416351	FALSE
cg10796931	chr1	162497574	162497573	rs10800576:162462572:C:G	162492782	162492782	0	3.23241e-29	-0.435137	0.0309135	FALSE
cg21352794	chr1	162561002	162561001	rs7548699:162571816:A:G	162602026	162602026	0	6.44788e-10	-0.170387	0.0257923	FALSE
cg15103675	chr1	162561730	162561729	rs28384483:162531494:C:T	162561704	162561704	0	2.53497e-14	0.446158	0.052881	FALSE
cg11501313	chr1	162678578	162678577	rs61811976:162654724:A:C	162684934	162684934	0	6.13475e-14	-0.413246	0.049884	FALSE
cg09820101	chr1	162822303	162822302	rs75029947:162794437:A:T	162824647	162824647	0	4.68998e-08	0.164391	0.0285581	TRUE
cg12406726	chr1	162822779	162822778	rs10799873:162815806:G:A	162846016	162846016	0	9.41119e-10	-0.200309	0.0306582	TRUE
cg14252661	chr1	162822824	162822823	rs200752085:162786939:C:CTT	162817149	162817149	0	8.66296e-10	-0.17765	0.0271241	FALSE
cg17678047	chr1	162878215	162878214	rs2665492:162844172:A:G	162874382	162874382	0	4.28618e-18	0.466162	0.047087	FALSE
cg13727659	chr1	163063784	163063783	rs951437	163063721	163063721	0	7.89426e-19	0.247873	0.0243512	FALSE
cg20217549	chr1	163070540	163070539	rs7515900	163068823	163068823	0	3.47003e-07	-0.137122	0.0257062	FALSE
cg07521829	chr1	163322451	163322450	rs2292275:163292217:T:C	163322427	163322427	0	4.04551e-12	0.141738	0.018786	FALSE
cg06092702	chr1	163423120	163423119	rs4657268:163376507:A:T	163406717	163406717	0	2.90276e-08	-0.205464	0.035093	FALSE
cg24133079	chr1	164853626	164853625	rs12723035:164820162:A:G	164850925	164850925	0	7.0698e-18	-0.251845	0.0256534	FALSE
cg18206481	chr1	165235266	165235265	rs10494440:165216783:C:T	165247546	165247546	0	3.17081e-14	1.25959	0.14998	FALSE
cg18206481	chr1	165235266	165235265	rs112950764:165204400:GC:G	165235163	165235164	1	6.27828e-09	0.846763	0.137395	FALSE
cg17716664	chr1	165235563	165235562	rs10494440:165216783:C:T	165247546	165247546	0	6.49815e-18	0.322045	0.0327575	FALSE
cg27590049	chr1	165235963	165235962	rs4657418:165205078:G:C	165235841	165235841	0	2.59932e-11	-0.140334	0.0194715	FALSE
cg02885925	chr1	165356833	165356832	rs12081765	165372612	165372612	0	3.46904e-07	0.343547	0.0644038	TRUE
cg23971170	chr1	165357033	165357032	rs12081765	165372612	165372612	0	1.1315e-09	0.086701	0.0133425	FALSE
cg13901501	chr1	165445278	165445277	rs3753897:165414511:C:A	165445274	165445274	0	1.43074e-13	0.225544	0.0277192	FALSE
cg02449975	chr1	165602044	165602043	rs10800113:165571573:A:G	165602336	165602336	0	3.14102e-07	-0.0988985	0.018466	FALSE
cg16016063	chr1	165617324	165617323	rs11333321:165589424:TA:T	165620187	165620188	0	1.49993e-08	-0.154869	0.0258596	FALSE
cg08510884	chr1	165632041	165632040	rs12040685:165599858:G:A	165630621	165630621	0	9.52288e-24	0.217193	0.0180616	FALSE
cg21165486	chr1	165637621	165637620	rs4147596:165601365:T:C	165632128	165632128	0	6.2807e-09	0.105975	0.0171957	FALSE
cg25677919	chr1	165737982	165737981	rs5778470:165696836:G:GA	165727599	165727599	0	1.17485e-08	-0.210367	0.0348407	TRUE
cg15224822	chr1	165769517	165769516	rs11430311:165687073:A:AT	165717836	165717836	0	2.64014e-07	0.254597	0.0472085	TRUE
cg10234330	chr1	165769658	165769657	rs7518099:165736880:C:T	165767643	165767643	0	3.588e-12	0.333717	0.0441047	FALSE
cg23935261	chr1	165841971	165841970	rs11590711:165813862:G:A	165844625	165844625	0	9.47161e-08	0.114069	0.0203322	FALSE
cg01427815	chr1	165842748	165842747	rs6426941:165811486:C:A	165842249	165842249	0	1.10456e-25	-0.368698	0.0289209	FALSE
cg01574241	chr1	165904589	165904588	rs79244563:165172064:C:G	165202827	165202827	0	2.87719e-07	0.641478	0.119354	TRUE
cg11407681	chr1	166070682	166070681	rs6426942:165825166:G:A	165855929	165855929	0	2.04312e-07	-0.204985	0.0376268	FALSE
cg02412072	chr1	166350660	166350659	rs6680946:166329458:G:T	166360221	166360221	0	2.74219e-08	-0.150179	0.0255996	TRUE
cg21024022	chr1	166354491	166354490	rs4311865:166323776:C:G	166354539	166354539	0	7.00644e-13	-0.261109	0.0332302	FALSE
cg03530994	chr1	166700772	166700771	rs540656:166669237:G:A	166700000	166700000	0	3.91147e-09	-0.133445	0.021329	FALSE
cg13725898	chr1	166838116	166838115	rs183475333:166515296:T:C	166546059	166546059	0	1.2863e-07	0.587892	0.106003	TRUE
cg02063079	chr1	166838607	166838606	rs7554414:166803004:A:G	166833767	166833767	0	1.6571e-07	0.10653	0.0193959	FALSE
cg07049167	chr1	166849270	166849269	rs140146592:166835987:A:AT	166866750	166866750	0	7.20236e-20	0.320152	0.0302831	FALSE
cg03433241	chr1	166884042	166884041	rs7542169:166864373:A:G	166895136	166895136	0	1.04527e-06	0.0734293	0.0144188	FALSE
cg12850103	chr1	166974374	166974373	rs2072742:166929673:A:G	166960436	166960436	0	4.23024e-09	-0.185171	0.0296697	TRUE
cg00109164	chr1	167053375	167053374	rs60547385:167021730:GC:G	167052493	167052494	0	3.12447e-22	0.495502	0.043243	TRUE
cg06665322	chr1	167090129	167090128	rs4657622:167020322:A:T	167051085	167051085	0	2.20864e-07	0.177051	0.0325987	TRUE
cg21693676	chr1	167118573	167118572	rs10918634:167091899:A:T	167122662	167122662	0	2.81982e-09	-0.13623	0.0215529	TRUE
cg23659062	chr1	167119422	167119421	rs10918634:167091899:A:T	167122662	167122662	0	1.30634e-18	-0.343084	0.0339816	FALSE
cg20328570	chr1	167125907	167125906	exm120205	167125926	167125926	0	4.98229e-07	0.140124	0.0266613	FALSE
cg22621589	chr1	167138570	167138569	rs71594811:167111951:TATATG:T	167142714	167142719	0	1.35145e-12	0.269148	0.034769	TRUE
cg24693760	chr1	167540682	167540681	rs16859159	167538620	167538620	0	9.11612e-35	1.02747	0.0634171	FALSE
cg19948045	chr1	167547132	167547131	rs10918711:167515132:C:T	167545895	167545895	0	6.96606e-12	0.186208	0.0250047	FALSE
cg17936236	chr1	167551069	167551068	rs16859185:167513648:G:C	167544411	167544411	0	1.61002e-17	0.383996	0.0396662	FALSE
cg01169725	chr1	167551270	167551269	rs1043310:167511035:C:G	167541798	167541798	0	1.61782e-08	0.211512	0.0354081	FALSE
cg27153316	chr1	167556180	167556179	exm2250198	167562035	167562035	0	1.00097e-09	-0.134673	0.0206499	FALSE
cg12441716	chr1	168015820	168015819	rs12736786:167988283:C:G	168019045	168019045	0	1.7023e-07	0.144395	0.0263173	TRUE
cg25949191	chr1	168082329	168082328	rs60975248:167879253:C:A	167910015	167910015	0	5.38288e-15	-0.26996	0.0310196	FALSE
cg04846842	chr1	168177922	168177921	rs12728893:168115202:G:A	168145964	168145964	0	5.48725e-07	-0.150512	0.0287531	TRUE
cg17859187	chr1	168178692	168178691	rs4657739:168142489:C:T	168173251	168173251	0	5.14306e-21	0.301075	0.0273633	FALSE
cg05393023	chr1	168225589	168225588	rs34517084:168207079:A:ATG	168237841	168237841	0	8.42918e-08	0.182025	0.0323045	TRUE
cg20480045	chr1	168225709	168225708	rs4656572:168194927:C:T	168225689	168225689	0	4.14869e-12	0.178611	0.0236873	FALSE
cg23970458	chr1	168483959	168483958	rs10918902:168453192:A:T	168483954	168483954	0	1.02558e-13	-0.637504	0.0777936	TRUE
cg00677697	chr1	168488308	168488307	rs139843636:168457959:T:TA	168488721	168488721	0	6.95023e-10	0.243336	0.0369151	TRUE
cg24594348	chr1	169081868	169081867	rs146100522:169086815:G:GA	169117577	169117577	0	8.96753e-07	0.286035	0.0557943	TRUE
cg12299137	chr1	169103648	169103647	1:169075857:C:CCCG	169106619	169106619	0	1.35558e-17	0.239868	0.0247051	TRUE
cg23826681	chr1	169105573	169105572	rs1200130:169078572:C:T	169109334	169109334	0	6.21676e-07	0.0811063	0.0155754	FALSE
cg26846588	chr1	169147051	169147050	rs12127613:169133074:C:T	169163836	169163836	0	2.17098e-10	-0.184254	0.0270455	FALSE
cg21342350	chr1	169312353	169312352	rs1200153:169092825:A:C	169123587	169123587	0	4.94522e-07	0.222319	0.0422873	TRUE
cg03024037	chr1	169328063	169328062	rs929133:169294976:G:T	169325738	169325738	0	2.63095e-10	-0.202608	0.0298986	TRUE
cg14826711	chr1	169427672	169427671	rs10919146:169313682:T:G	169344444	169344444	0	2.13641e-08	-0.333419	0.056347	FALSE
cg25464921	chr1	169460461	169460460	rs1949426:169376867:G:A	169407629	169407629	0	3.25879e-07	-0.0920108	0.0172055	FALSE
cg04652611	chr1	169460545	169460544	rs1949426:169376867:G:A	169407629	169407629	0	4.47449e-07	-0.0725429	0.0137415	FALSE
cg15049744	chr1	169460816	169460815	rs34525133:169440938:A:G	169471700	169471700	0	7.38945e-09	0.131905	0.0215158	TRUE
cg07355428	chr1	169550561	169550560	rs74406869:169480371:A:G	169511133	169511133	0	3.03816e-07	0.29791	0.0555505	FALSE
cg25256723	chr1	169586707	169586706	rs200691061:169529141:GTA:G	169559903	169559905	0	8.99065e-09	1.72893	0.283826	TRUE
cg25256723	chr1	169586707	169586706	rs3766146:169817568:A:C	169848427	169848427	1	1.37825e-06	1.0202	0.202788	TRUE
cg08745595	chr1	169586775	169586774	rs10800458:169549811:G:T	169580573	169580573	0	3.3051e-08	0.800392	0.137329	FALSE
cg08745595	chr1	169586775	169586774	rs57805301:169776626:A:C	169807485	169807485	1	1.21564e-06	1.00997	0.199641	FALSE
cg08624834	chr1	169681435	169681434	rs61807817:169779810:T:C	169810669	169810669	0	1.96497e-07	-0.196294	0.0359765	FALSE
cg08264335	chr1	169712193	169712192	rs7513119:169690816:T:A	169721675	169721675	0	2.77506e-13	0.365022	0.0455096	FALSE
cg14796679	chr1	169712287	169712286	exm122215	169704697	169704697	0	5.79594e-14	0.382109	0.0460706	FALSE
cg26204283	chr1	169794322	169794321	rs79945836:169763807:G:C	169794666	169794666	0	1.09973e-14	0.455344	0.0530666	FALSE
cg15378869	chr1	169794477	169794476	rs115234612:169849141:A:G	169880000	169880000	0	6.15838e-10	0.168372	0.0254534	TRUE
cg15042942	chr1	170074781	170074780	rs1330377:170050602:C:T	170081461	170081461	0	5.22876e-10	0.112438	0.0169177	FALSE
cg02228073	chr1	170309804	170309803	rs11581269:170278878:T:G	170309737	170309737	0	1.7131e-07	-0.208827	0.03807	TRUE
cg13910263	chr1	170591355	170591354	rs11808978:170560767:A:G	170591626	170591626	0	2.79151e-18	-1.27233	0.127604	FALSE
cg13910263	chr1	170591355	170591354	rs5778672:170562170:A:AT	170593029	170593029	1	1.86731e-07	-0.595247	0.10888	TRUE
cg14183781	chr1	170663259	170663258	rs56250774:170632384:A:G	170663243	170663243	0	1.0936e-10	-0.167871	0.0241843	FALSE
cg02584225	chr1	170667429	170667428	rs651822:170619930:G:T	170650789	170650789	0	5.70285e-08	-0.149113	0.0260872	FALSE
cg09010107	chr1	170669667	170669666	rs645211:170583324:G:C	170614183	170614183	0	3.22162e-10	0.24125	0.0358034	FALSE
cg26299980	chr1	65419766	65419765	rs3838397:65877409:TG:T	65411726	65411727	0	1.35722e-08	-0.111232	0.018511	TRUE
cg14976592	chr1	65420478	65420477	rs12145690	65421330	65421330	0	2.21253e-31	0.333867	0.0224108	FALSE
cg16413020	chr1	65420734	65420733	rs12145690	65421330	65421330	0	1.01886e-17	0.189964	0.0194702	FALSE
cg03514351	chr1	65526083	65526082	rs142401607:65921035:A:C	65455352	65455352	0	3.12381e-07	-0.321498	0.060016	TRUE
cg16265717	chr1	65527467	65527466	rs1075473:65098136:T:C	64632453	64632453	0	8.29221e-08	-0.260882	0.0462714	TRUE
cg09168320	chr1	65565364	65565363	rs10789185:66045864:G:C	65580181	65580181	0	4.08738e-13	-0.336661	0.042333	FALSE
cg23534774	chr1	65570612	65570611	rs76303603:66165578:T:C	65699895	65699895	0	5.6359e-08	1.27525	0.223008	TRUE
cg03607891	chr1	65633933	65633932	rs9436746:65908473:A:C	65442790	65442790	0	2.49912e-08	-0.0949013	0.0161249	FALSE
cg09621235	chr1	65687955	65687954	rs78052673:66148652:T:C	65682969	65682969	0	1.04422e-13	0.209444	0.0255679	TRUE
cg04111102	chr1	65688112	65688111	rs79653480:66148954:T:A	65683271	65683271	0	2.9222e-13	0.185125	0.0231068	FALSE
cg22733910	chr1	65791871	65791870	rs77979890:66257654:G:T	65791971	65791971	0	4.14472e-08	0.143283	0.0247816	TRUE
cg04704294	chr1	65792140	65792139	rs66998583:66254460:CT:C	65788777	65788778	0	3.32916e-32	0.48258	0.0317233	FALSE
cg04700907	chr1	66248850	66248849	exm2268897	66248901	66248901	0	2.51221e-13	0.227844	0.0283451	FALSE
cg10495572	chr1	66445511	66445510	rs783435	66449442	66449442	0	1.29574e-07	-0.0986889	0.0177997	FALSE
cg13052034	chr1	66533556	66533555	1:66999215:G:GATAAT	66533532	66533532	0	2.04052e-28	0.778323	0.0565064	FALSE
cg23217983	chr1	66553143	66553142	rs72677052:66984572:G:A	66518889	66518889	0	3.23818e-09	0.128691	0.0204479	FALSE
cg09112723	chr1	66676726	66676725	rs78137332:67152483:C:G	66686800	66686800	0	3.30947e-07	0.481784	0.0901469	TRUE
cg16996144	chr1	66752268	66752267	rs376427492:67152981:C:CA	66687298	66687298	0	1.77021e-09	0.154651	0.0241209	TRUE
cg11580118	chr1	66758232	66758231	rs12059355:67223764:G:C	66758081	66758081	0	4.18257e-17	0.19035	0.0199909	FALSE
cg00044354	chr1	66924202	66924201	rs112558617:67457477:C:CT	66991794	66991794	0	4.72079e-11	-0.414138	0.0583516	TRUE
cg00704590	chr1	66996378	66996377	rs139016291:67437899:C:CAT	66972216	66972216	0	3.60022e-10	0.19321	0.0287638	TRUE
cg02640540	chr1	67053229	67053228	rs67794016:67522306:TACAG:T	67056623	67056627	0	7.16856e-20	0.267621	0.0253123	FALSE
cg14626797	chr1	67054576	67054575	rs3806321:67520083:C:T	67054400	67054400	0	1.07599e-09	-0.216878	0.0333257	FALSE
cg17031739	chr1	67134490	67134489	rs10789224	67139451	67139451	0	3.71794e-18	0.3412	0.0343829	FALSE
cg21684588	chr1	67134583	67134582	exm-rs11209003	67135449	67135449	0	2.57581e-20	0.298659	0.0278079	FALSE
cg08029281	chr1	67134746	67134745	rs12060309:67604219:T:C	67138536	67138536	0	1.0957e-11	0.596923	0.0810505	FALSE
cg17833169	chr1	67134865	67134864	rs12044149:67600686:G:T	67135003	67135003	0	2.35978e-16	0.745994	0.0808026	FALSE
cg22654157	chr1	67135016	67135015	rs12044149:67600686:G:T	67135003	67135003	0	1.28462e-28	0.41757	0.0301499	FALSE
cg12940439	chr1	67135025	67135024	rs12044149:67600686:G:T	67135003	67135003	0	6.14894e-25	0.353508	0.0283494	FALSE
cg09433222	chr1	67135140	67135139	rs12044149:67600686:G:T	67135003	67135003	0	5.18068e-27	0.502154	0.0379094	FALSE
cg03340356	chr1	67135153	67135152	exm-rs11209003	67135449	67135449	0	2.12936e-20	0.43622	0.0404988	FALSE
cg02132783	chr1	67135281	67135280	rs12060309:67604219:T:C	67138536	67138536	0	3.18245e-17	0.291698	0.030489	FALSE
cg04311496	chr1	67308037	67308036	rs3977732:67773778:TTA:T	67308095	67308097	0	4.10096e-08	-0.14468	0.0250138	TRUE
cg02565946	chr1	67539598	67539597	rs6702973:68001418:A:G	67535735	67535735	0	2.50625e-29	-0.511557	0.0362352	FALSE
cg04284321	chr1	67675527	67675526	rs12124131:67940214:C:G	67474531	67474531	0	1.03102e-06	-0.276652	0.054292	TRUE
cg03991309	chr1	67772079	67772078	rs1938442:68332661:G:A	67866978	67866978	0	8.13565e-08	0.186049	0.0329752	FALSE
cg22522961	chr1	67823135	67823134	rs115272975:69166987:G:A	68701304	68701304	0	3.30456e-08	0.542513	0.0930822	TRUE
cg03110901	chr1	67831904	67831903	rs1938442:68332661:G:A	67866978	67866978	0	1.99771e-20	0.393296	0.0364785	FALSE
cg06451878	chr1	67831941	67831940	rs12132157:68354885:C:T	67889202	67889202	0	1.53637e-22	0.455069	0.0393188	FALSE
cg10178795	chr1	67832750	67832749	rs11422955:68287749:G:GA	67822066	67822066	0	5.48409e-13	0.228843	0.0289643	TRUE
cg26764244	chr1	67833829	67833828	rs2249993:68296104:G:C	67830421	67830421	0	2.88173e-15	-0.234974	0.0266732	FALSE
cg02020667	chr1	68010615	68010614	rs6684626:68469094:G:A	68003411	68003411	0	4.18894e-14	-0.558788	0.0669188	FALSE
cg00242147	chr1	68231134	68231133	rs72670465:68695462:C:A	68229779	68229779	0	2.01909e-08	0.268918	0.0453586	FALSE
cg09094121	chr1	68231874	68231873	rs2566774:68694877:T:C	68229194	68229194	0	8.4509e-27	0.326253	0.0247791	FALSE
cg10192138	chr1	68378843	68378842	rs1952124	68376385	68376385	0	3.34769e-27	-0.630438	0.0473398	FALSE
cg27128435	chr1	68600405	68600404	rs2473802:69058824:C:T	68593141	68593141	0	2.14077e-26	-0.408184	0.0313621	FALSE
cg13448816	chr1	69567158	69567157	rs947420:70014986:C:T	69549303	69549303	0	4.15997e-10	-0.177354	0.0265115	FALSE
cg22413194	chr1	69568354	69568353	1:69975075:C:T	69509392	69509392	0	1.25664e-07	0.145716	0.0262509	TRUE
cg22076941	chr1	69570424	69570423	rs947420:70014986:C:T	69549303	69549303	0	1.3523e-10	0.143792	0.0208346	FALSE
cg02925615	chr1	70504547	70504546	rs622854:70977879:A:G	70512196	70512196	0	2.7574e-09	-0.197949	0.0312957	FALSE
cg13334096	chr1	70720971	70720970	rs2782788:71186714:A:G	70721031	70721031	0	1.39053e-16	-0.322354	0.0345835	FALSE
cg06937997	chr1	71046418	71046417	rs9970739:71539253:T:A	71073570	71073570	0	7.59342e-08	-0.263631	0.046607	TRUE
cg24940889	chr1	71464294	71464293	rs977145	71463606	71463606	0	1.18411e-08	0.181428	0.0300558	FALSE
cg16014655	chr1	73749965	73749964	rs77590512:74210645:TA:T	73744962	73744963	0	2.43756e-08	-0.119238	0.0202427	TRUE
cg23796177	chr1	73899380	73899379	rs72954138:74359097:A:T	73893414	73893414	0	7.95774e-08	0.172149	0.0304866	FALSE
cg16356856	chr1	74197900	74197899	rs571848:74671519:A:G	74205835	74205835	0	8.55646e-08	0.177656	0.0315466	FALSE
cg13900770	chr1	74197953	74197952	rs571848:74671519:A:G	74205835	74205835	0	1.23569e-08	0.203332	0.0337322	FALSE
cg21446242	chr1	74198144	74198143	rs67800484:74679219:TA:T	74213535	74213536	0	3.99876e-21	0.141386	0.0128022	TRUE
cg23752735	chr1	74198148	74198147	rs571848:74671519:A:G	74205835	74205835	0	4.21642e-10	0.0902744	0.0134997	FALSE
cg23364470	chr1	74198160	74198159	rs10890113:74602233:T:C	74136549	74136549	0	1.65301e-08	0.0951074	0.015933	FALSE
cg03837750	chr1	74198477	74198476	rs71798754:74681010:C:CT	74215326	74215326	0	7.35873e-11	0.119743	0.0170694	FALSE
cg07494719	chr1	74652678	74652677	rs35132035:75118230:CT:C	74652546	74652547	0	3.22798e-07	0.166558	0.0311334	TRUE
cg19634242	chr1	74673281	74673280	rs1424663:75150381:G:T	74684697	74684697	0	9.93301e-09	0.190457	0.0313686	FALSE
cg27393126	chr1	74673681	74673680	rs10789400:75140299:A:G	74674615	74674615	0	5.37622e-10	0.11172	0.016823	FALSE
cg22427475	chr1	74673787	74673786	rs10789400:75140299:A:G	74674615	74674615	0	3.01434e-14	0.139306	0.0165701	FALSE
cg27268184	chr1	74673898	74673897	rs7546095:75140559:A:T	74674875	74674875	0	2.00379e-08	0.130694	0.0220386	FALSE
cg13341453	chr1	74673900	74673899	rs10789400:75140299:A:G	74674615	74674615	0	4.37721e-08	0.122033	0.0211474	FALSE
cg03513964	chr1	74674063	74674062	rs7546095:75140559:A:T	74674875	74674875	0	2.40716e-14	0.153713	0.0181997	FALSE
cg09365529	chr1	74674606	74674605	rs10789400:75140299:A:G	74674615	74674615	0	6.9247e-17	0.244477	0.0259043	FALSE
cg12981534	chr1	74731714	74731713	rs1424671:75189847:T:C	74724163	74724163	0	1.15974e-12	0.232282	0.0299016	FALSE
cg17719053	chr1	74732528	74732527	rs28695657:75197614:G:T	74731930	74731930	0	1.81253e-28	0.42524	0.0308291	FALSE
cg10128416	chr1	74732720	74732719	rs28695657:75197614:G:T	74731930	74731930	0	3.77416e-16	0.336585	0.0367719	FALSE
cg21906852	chr1	74732899	74732898	rs28602706:75199973:T:C	74734289	74734289	0	3.45062e-18	0.436608	0.0439426	FALSE
cg09502221	chr1	74732916	74732915	rs28602706:75199973:T:C	74734289	74734289	0	6.79719e-10	0.211169	0.0320144	FALSE
cg13528603	chr1	74732985	74732984	rs79762448:75213566:CAT:C	74747882	74747884	0	7.31527e-08	0.22606	0.0399101	TRUE
cg07399417	chr1	74733085	74733084	rs2345435:75193271:T:C	74727587	74727587	0	2.61436e-08	0.176353	0.0300115	FALSE
cg26855724	chr1	74733135	74733134	rs79762448:75213566:CAT:C	74747882	74747884	0	4.16425e-11	0.346314	0.0486366	FALSE
cg02709834	chr1	74733158	74733157	rs1424671:75189847:T:C	74724163	74724163	0	9.3205e-09	0.21164	0.0347845	FALSE
cg26690034	chr1	74733280	74733279	rs28602706:75199973:T:C	74734289	74734289	0	3.54424e-08	0.278792	0.0479521	FALSE
cg26752657	chr1	74733392	74733391	rs28602706:75199973:T:C	74734289	74734289	0	1.86948e-13	0.355356	0.0439253	FALSE
cg21535942	chr1	74733417	74733416	rs28602706:75199973:T:C	74734289	74734289	0	2.67702e-15	0.310679	0.0352167	FALSE
cg00121533	chr1	74733434	74733433	rs28695657:75197614:G:T	74731930	74731930	0	5.29468e-15	0.445377	0.0511592	FALSE
cg26457504	chr1	74733461	74733460	rs79762448:75213566:CAT:C	74747882	74747884	0	4.34709e-12	0.428969	0.0569531	TRUE
cg09200014	chr1	74733494	74733493	rs1424671:75189847:T:C	74724163	74724163	0	1.36215e-15	0.467003	0.0522573	FALSE
cg09142399	chr1	74734411	74734410	rs28602706:75199973:T:C	74734289	74734289	0	1.1829e-09	0.139483	0.0214934	FALSE
cg20855608	chr1	74734547	74734546	rs28602706:75199973:T:C	74734289	74734289	0	6.06019e-12	0.14486	0.0193868	TRUE
cg10976790	chr1	75068148	75068147	rs67297875:75595588:TTCTC:T	75129903	75129907	0	7.84396e-26	0.358094	0.0279672	TRUE
cg12303627	chr1	75083573	75083572	rs184677113:75677577:T:C	75211892	75211892	0	4.51811e-14	-0.702311	0.0842387	TRUE
cg19188436	chr1	75133185	75133184	rs2077678:75534827:A:G	75069143	75069143	0	1.79884e-06	-0.125359	0.0252184	TRUE
cg17199271	chr1	75615355	75615354	rs6670607:76088640:C:G	75622955	75622955	0	1.71305e-06	-0.0950666	0.0190822	TRUE
cg05258079	chr1	75723508	75723507	rs2761587:76149181:T:C	75683496	75683496	0	2.52237e-13	-0.198594	0.0247083	TRUE
cg22875332	chr1	75724023	75724022	rs2761587:76149181:T:C	75683496	75683496	0	7.15891e-44	-0.912697	0.0459187	TRUE
cg10523679	chr1	75724086	75724085	rs66969748:76173920:AC:A	75708235	75708236	0	1.1152e-38	-0.610671	0.0344098	FALSE
cg14565881	chr1	75724356	75724355	rs146231459:76405003:A:C	75939318	75939318	0	1.25884e-07	0.317045	0.0571199	TRUE
cg27478651	chr1	75724744	75724743	rs79841811:76719077:G:A	76253392	76253392	0	3.27254e-07	0.105921	0.0198099	TRUE
cg13421759	chr1	75786068	75786067	rs5745353:76275137:A:T	75809452	75809452	0	1.47916e-08	-0.150189	0.0250665	TRUE
cg05598546	chr1	75786082	75786081	rs11161718:76308413:G:A	75842728	75842728	0	4.49357e-13	-0.137094	0.017275	FALSE
cg08702915	chr1	75788004	75788003	rs1146598:76237176:A:G	75771491	75771491	0	9.32059e-11	-0.326287	0.0468056	FALSE
cg16427752	chr1	75796618	75796617	rs139017743:76156677:G:GA	75690992	75690992	0	7.01117e-08	0.207315	0.0365436	TRUE
cg02161115	chr1	75796689	75796688	rs74832192:76137736:A:C	75672051	75672051	0	1.12117e-07	0.165491	0.0296851	TRUE
cg08431884	chr1	75796821	75796820	rs79552201:76215497:A:T	75749812	75749812	0	7.72398e-10	0.372163	0.0566324	TRUE
cg18010781	chr1	75796859	75796858	rs79552201:76215497:A:T	75749812	75749812	0	5.05315e-07	0.252916	0.0481503	TRUE
cg14200364	chr1	75796910	75796909	rs139017743:76156677:G:GA	75690992	75690992	0	2.77315e-09	0.325737	0.0515082	TRUE
cg22035229	chr1	75796964	75796963	rs12145334:76168496:G:A	75702811	75702811	0	4.07082e-08	0.436159	0.0753879	TRUE
cg22538495	chr1	76041117	76041116	rs291071:76535980:T:C	76070295	76070295	0	1.11974e-15	0.27448	0.0306006	FALSE
cg14618562	chr1	76154493	76154492	rs61771337:76610280:G:A	76144595	76144595	0	1.25523e-09	-0.208447	0.0321773	FALSE
cg24580071	chr1	76154587	76154586	rs12122853:76620253:G:A	76154568	76154568	0	2.57308e-10	-0.330507	0.0487424	FALSE
cg04073724	chr1	76154650	76154649	rs12122853:76620253:G:A	76154568	76154568	0	5.97749e-08	-0.260834	0.0457107	FALSE
cg11282105	chr1	76279644	76279643	rs6702605:76742579:A:G	76276894	76276894	0	4.45011e-07	-0.125818	0.0238278	FALSE
cg10541576	chr1	77448018	77448017	rs12044354:77918347:A:G	77452662	77452662	0	4.25076e-12	0.216144	0.0286816	FALSE
cg04072680	chr1	77760084	77760083	rs35944959:78056847:GT:G	77591162	77591163	0	5.56165e-15	0.166362	0.019128	TRUE
cg06914015	chr1	77889155	77889154	1:78295320:A:AT	77829635	77829635	0	9.34236e-10	-0.359431	0.0550007	TRUE
cg16889022	chr1	77889541	77889540	rs115007809:78166978:C:T	77701293	77701293	0	1.94089e-10	-0.347914	0.0509106	FALSE
cg20227495	chr1	77889584	77889583	rs202137648:78355115:A:AAGTTTACGT	77889430	77889430	0	1.55691e-09	-0.370887	0.0576232	TRUE
cg01014287	chr1	77979486	77979485	rs72685315:78292909:G:A	77827224	77827224	0	3.23437e-09	0.818365	0.130026	TRUE
cg09148021	chr1	78004734	78004733	rs41311176:78470506:C:T	78004822	78004822	0	1.40051e-10	0.850385	0.123333	TRUE
cg24795785	chr1	78004862	78004861	rs41311176:78470506:C:T	78004822	78004822	0	8.94478e-14	0.582563	0.0708833	TRUE
cg09826056	chr1	78045677	78045676	rs187176672:78824395:G:T	78358711	78358711	0	1.10858e-06	0.325903	0.0641603	TRUE
cg08061922	chr1	78333635	78333634	rs139650989:78778306:T:G	78312622	78312622	0	3.02621e-08	0.453848	0.0776295	TRUE
cg05002748	chr1	78685686	78685685	rs58830966:79122899:A:G	78657214	78657214	0	1.22209e-11	-0.209381	0.0285068	FALSE
cg27513759	chr1	78833640	78833639	exm2268710	78833726	78833726	0	1.55761e-16	-0.23748	0.02553	FALSE
cg17415326	chr1	78885234	78885233	rs228569:79637244:C:T	79171559	79171559	0	1.70368e-08	0.281943	0.0472813	FALSE
cg04360793	chr1	79006677	79006676	rs228556:79650782:T:C	79185097	79185097	1	1.34801e-06	0.781545	0.155197	TRUE
cg26719105	chr1	79006839	79006838	rs68145105:79584857:AT:A	79119172	79119173	0	1.23022e-16	-0.252107	0.0269877	TRUE
cg02154252	chr1	79006848	79006847	rs17408603	79121700	79121700	0	2.90375e-18	-0.300095	0.0301167	FALSE
cg18592365	chr1	79006852	79006851	rs228556:79650782:T:C	79185097	79185097	0	5.27231e-11	0.161176	0.0227751	FALSE
cg01402735	chr1	79006874	79006873	rs111705965:79583134:G:GC	79117449	79117449	0	2.62526e-07	-0.179566	0.0332884	TRUE
cg19532861	chr1	79124925	79124924	rs68145105:79584857:AT:A	79119172	79119173	0	2.2866e-17	-0.251438	0.0261306	TRUE
cg17175521	chr1	79161938	79161937	rs17408603	79121700	79121700	0	6.81247e-23	0.371994	0.0317785	FALSE
cg26518660	chr1	79262924	79262923	rs150718497:79706414:A:C	79240729	79240729	0	2.61655e-12	0.422006	0.0553589	TRUE
cg04353868	chr1	80218176	80218175	rs180983257:80679260:T:G	80213575	80213575	0	1.04477e-30	-1.36617	0.0933124	TRUE
cg22730457	chr1	80656787	80656786	rs114610745:81159002:C:G	80693317	80693317	0	3.02434e-23	-0.819359	0.0692164	TRUE
cg17879133	chr1	81143449	81143448	rs76737498:81642745:C:G	81177060	81177060	0	7.86579e-08	-0.155734	0.0275679	TRUE
cg13349503	chr1	81325686	81325685	rs114688104:81817295:A:G	81351610	81351610	0	3.57915e-07	-0.107691	0.0202141	TRUE
cg05512169	chr1	81557738	81557737	rs10874219:81821441:T:C	81355756	81355756	0	6.16996e-07	-0.0998545	0.0191697	TRUE
cg15828454	chr1	81760686	81760685	rs12045865:82252737:C:T	81787052	81787052	0	2.31927e-12	0.179219	0.0234436	FALSE
cg06940482	chr1	81802497	81802496	rs3842542:82316524:CT:C	81850839	81850840	0	2.50905e-19	0.402983	0.0388699	TRUE
cg09269935	chr1	4481496	4481495	rs76453659:4541660:C:T	4481600	4481600	0	7.56356e-09	0.246517	0.0402413	TRUE
cg16906964	chr1	4600112	4600111	rs7528368:4659248:T:A	4599188	4599188	0	6.77055e-23	-0.515253	0.0440129	FALSE
cg00930781	chr1	4600506	4600505	rs7528368:4659248:T:A	4599188	4599188	0	8.13486e-14	-0.385944	0.0468655	FALSE
cg04306992	chr1	4652296	4652295	rs34642555:4694470:G:A	4634410	4634410	0	9.60865e-08	-0.153466	0.0273692	TRUE
cg10146268	chr1	4654917	4654916	rs12135245:4724231:G:C	4664171	4664171	0	1.18904e-10	0.165223	0.0238566	FALSE
cg01982088	chr1	4654927	4654926	rs12135245:4724231:G:C	4664171	4664171	0	2.39141e-11	0.15921	0.0220439	TRUE
cg18957455	chr1	4742166	4742165	rs61766960:4799309:A:G	4739249	4739249	0	1.67728e-09	0.25054	0.039013	FALSE
cg23015920	chr1	4770385	4770384	rs3835205:4832143:ATTT:A	4772083	4772086	0	6.23574e-09	-0.173558	0.0281551	TRUE
cg19821682	chr1	4789004	4789003	rs6426434:4845892:G:A	4785832	4785832	0	7.35764e-08	0.114885	0.0202868	FALSE
cg23656015	chr1	4965115	4965114	rs3128678:5025179:A:G	4965119	4965119	0	1.71845e-08	-0.148213	0.0248623	TRUE
cg18947954	chr1	5235687	5235686	rs6603822:5288376:G:T	5228316	5228316	0	5.21806e-19	0.271871	0.0265312	FALSE
cg18036623	chr1	5239997	5239996	1:5274830:A:ATT	5214770	5214770	0	4.95205e-12	-0.301328	0.0401316	TRUE
cg07199764	chr1	5287409	5287408	rs565916:5347426:A:G	5287366	5287366	0	4.90663e-18	0.42943	0.0434749	TRUE
cg17548413	chr1	5800298	5800297	rs28411274:5871141:A:G	5811081	5811081	0	5.31686e-08	-0.180048	0.0314194	TRUE
cg12590793	chr1	5832083	5832082	rs10864638:5882579:G:A	5822519	5822519	0	7.1917e-21	0.380903	0.0347913	FALSE
cg14559147	chr1	5860404	5860403	rs10864451:5918002:C:T	5857942	5857942	0	1.45912e-09	-0.254389	0.0394463	FALSE
cg05302064	chr1	5862627	5862626	rs881635:5920491:G:A	5860431	5860431	0	4.16853e-07	-0.18098	0.0341826	FALSE
cg01031615	chr1	5881918	5881917	rs56270325:5959301:A:T	5899241	5899241	0	3.4618e-14	0.234433	0.0279646	FALSE
cg16993213	chr1	5991299	5991298	rs11120772:5973775:G:A	5913715	5913715	0	3.12874e-18	0.278627	0.0279969	FALSE
cg01096738	chr1	5993683	5993682	rs141175835:6052074:C:CCCA	5992014	5992014	0	3.17322e-15	-0.132937	0.0151185	TRUE
cg02630629	chr1	6051612	6051611	1:5282275:TTATAGGTC:T	5222215	5222223	0	1.2647e-17	-1.19537	0.122971	TRUE
cg05382282	chr1	6104676	6104675	rs1883768:6165419:C:T	6105359	6105359	0	4.48929e-08	0.129159	0.0224025	FALSE
cg13839957	chr1	6105424	6105423	rs201833923:6167590:G:C	6107530	6107530	0	1.62353e-08	0.155769	0.0260796	FALSE
cg05781512	chr1	6111621	6111620	rs78116825:6848799:C:T	6788739	6788739	0	2.19627e-07	-0.573786	0.105622	TRUE
cg12135344	chr1	6128061	6128060	rs2273041:6184192:A:G	6124132	6124132	0	8.13926e-07	0.241743	0.0469584	FALSE
cg00389386	chr1	6128077	6128076	rs12754107:6146161:C:G	6086101	6086101	0	4.82837e-07	-0.181244	0.0344402	TRUE
cg21211271	chr1	6205012	6205011	rs4908539:6262880:G:A	6202820	6202820	0	2.50583e-26	0.713916	0.0549606	FALSE
cg19180828	chr1	6205161	6205160	rs4908540:6266096:A:G	6206036	6206036	0	1.31372e-25	0.561588	0.044149	FALSE
cg15584788	chr1	6205241	6205240	rs4908864	6203294	6203294	0	7.77358e-33	0.990157	0.0640684	FALSE
cg12396368	chr1	6234791	6234790	rs12084175:6296621:A:T	6236561	6236561	0	1.98552e-08	0.266359	0.0449011	FALSE
cg11019172	chr1	6236662	6236661	rs4908865:6269340:A:G	6209280	6209280	0	6.16384e-10	-0.674299	0.101939	FALSE
cg12723684	chr1	6243669	6243668	rs1775409:5719467:G:A	5659407	5659407	0	2.45383e-07	0.261091	0.0482723	TRUE
cg04055049	chr1	6261494	6261493	rs6703384:6316217:A:G	6256157	6256157	0	1.27217e-06	-0.117412	0.0232556	TRUE
cg14566624	chr1	6261523	6261522	rs2057006:6316884:G:C	6256824	6256824	0	1.77747e-07	-0.1407	0.0256868	TRUE
cg05573161	chr1	6378309	6378308	rs149753777:6733180:T:G	6673120	6673120	0	4.13428e-08	-0.516926	0.0893973	TRUE
cg19056927	chr1	6385850	6385849	rs114200864:6334301:G:A	6274241	6274241	0	2.996e-14	0.591186	0.0703109	FALSE
cg06407172	chr1	6385857	6385856	rs114200864:6334301:G:A	6274241	6274241	0	1.44761e-12	0.544191	0.0704109	FALSE
cg25855436	chr1	6385916	6385915	rs114200864:6334301:G:A	6274241	6274241	0	4.09516e-08	1.99428	0.344774	FALSE
cg25855436	chr1	6385916	6385915	rs7550518:7238663:G:A	7178603	7178603	1	4.36659e-08	0.60217	0.104342	FALSE
cg00297432	chr1	6424725	6424724	rs77829738:6498162:G:T	6438102	6438102	0	6.15957e-07	0.119675	0.0229731	TRUE
cg18953405	chr1	6424761	6424760	rs113844756:6497658:C:T	6437598	6437598	0	7.78584e-07	0.195065	0.0378193	TRUE
cg10059687	chr1	6466070	6466069	exm9626	6473333	6473333	0	2.29551e-07	0.14761	0.0272192	TRUE
cg16681526	chr1	6466410	6466409	rs2986751:6534781:G:A	6474721	6474721	0	2.4668e-09	0.398144	0.0627307	FALSE
cg12905865	chr1	6485755	6485754	rs145084014:6541460:G:T	6481400	6481400	0	5.11181e-07	0.183158	0.0348864	FALSE
cg04818845	chr1	6520108	6520107	rs58167405:6607578:GA:G	6547518	6547519	0	9.43556e-13	-0.164875	0.0211247	TRUE
cg04434328	chr1	6520114	6520113	rs4908904:6580250:C:T	6520190	6520190	0	1.1179e-14	0.176264	0.0205489	FALSE
cg07408569	chr1	6520328	6520327	rs4908926:6617041:C:T	6556981	6556981	0	7.04767e-13	0.169065	0.021519	FALSE
cg06972903	chr1	6520466	6520465	rs747712:6587685:A:T	6527625	6527625	0	6.21065e-09	0.184494	0.0299253	FALSE
cg22792644	chr1	6554659	6554658	rs4434862:6602241:C:A	6542181	6542181	0	4.61286e-13	-0.36824	0.0464282	FALSE
cg22040963	chr1	6612942	6612941	rs75995367:5768379:G:A	5708319	5708319	0	9.43535e-08	0.360719	0.0642868	TRUE
cg08163621	chr1	6625937	6625936	rs6684534:6686022:G:C	6625962	6625962	0	1.51197e-12	0.611643	0.0792177	FALSE
cg02993722	chr1	6638398	6638397	rs11121316:6199455:C:T	6139395	6139395	0	8.44247e-07	0.198024	0.0385266	TRUE
cg09975787	chr1	6727446	6727445	rs11122122	6730886	6730886	0	8.64359e-13	-0.175953	0.0224993	FALSE
cg16833163	chr1	6735830	6735829	rs447558	6735170	6735170	0	1.31713e-17	-0.269327	0.0277256	FALSE
cg16585946	chr1	6771660	6771659	rs5772255:6829070:T:TA	6769010	6769010	0	1.3797e-08	0.0985368	0.0164074	FALSE
cg27642159	chr1	6806897	6806896	rs142501097:7780245:CT:C	7720185	7720186	0	8.93038e-07	-0.539662	0.105248	TRUE
cg27167221	chr1	7043052	7043051	rs7517585:7099266:C:T	7039206	7039206	0	2.10175e-11	-0.247826	0.0342014	FALSE
cg00538247	chr1	7053330	7053329	rs11120826:7116656:T:C	7056596	7056596	0	1.43592e-16	0.254863	0.0273586	FALSE
cg13097088	chr1	7060841	7060840	rs6656691:7122453:C:G	7062393	7062393	0	6.04822e-09	-0.146036	0.0236672	FALSE
cg20434152	chr1	7060867	7060866	rs4436414	7060855	7060855	0	1.57088e-13	-0.236953	0.0291799	FALSE
cg10115203	chr1	7061186	7061185	rs11120829:7123793:A:C	7063733	7063733	0	1.04499e-06	-0.136113	0.0267274	FALSE
cg03765258	chr1	7150889	7150888	rs11587739:7211045:A:G	7150985	7150985	0	5.39259e-19	-0.288021	0.0281221	FALSE
cg04342483	chr1	7199231	7199230	rs763195:7255371:C:T	7195311	7195311	0	4.17613e-08	-0.133808	0.0231491	FALSE
cg25072257	chr1	7318091	7318090	rs12739426:7386456:C:A	7326396	7326396	0	2.09536e-09	0.155479	0.0243747	FALSE
cg03695692	chr1	7385408	7385407	rs6577443:7476934:C:T	7416874	7416874	0	6.12809e-09	-0.261469	0.0423927	TRUE
cg08923594	chr1	7402117	7402116	rs845204:7465286:G:A	7405226	7405226	0	5.02895e-24	-0.57315	0.0472556	FALSE
cg26251680	chr1	7455653	7455652	rs34371913:7595125:G:A	7535065	7535065	0	6.48935e-08	-0.134769	0.0236887	FALSE
cg00911446	chr1	7460020	7460019	rs1725235:7520129:C:T	7460069	7460069	0	7.183e-09	-0.190923	0.0311139	FALSE
cg20681877	chr1	7461091	7461090	rs11805932	7461419	7461419	0	3.77288e-07	-0.343984	0.0647059	TRUE
cg11228127	chr1	7493751	7493750	rs36208941:7559313:ATGAG:A	7499253	7499257	0	2.44716e-12	-0.22553	0.0295387	TRUE
cg13789229	chr1	7502245	7502244	rs2478272:7564207:C:T	7504147	7504147	0	9.86332e-16	-0.289722	0.0322227	FALSE
cg18862883	chr1	7668635	7668634	rs34041060:7937932:TA:T	7877872	7877873	0	1.00012e-07	-0.0828674	0.0148007	TRUE
cg11633926	chr1	7671947	7671946	rs2995035:7775092:G:C	7715032	7715032	0	1.73983e-07	-0.125326	0.0228612	TRUE
cg25763306	chr1	7681157	7681156	rs12747548:7744856:T:C	7684796	7684796	0	1.50593e-31	0.888834	0.0594085	FALSE
cg23228279	chr1	7697315	7697314	rs34351762:7782533:C:CAGTT	7722473	7722473	0	1.14391e-08	-0.116776	0.0193232	FALSE
cg09696653	chr1	7705294	7705293	rs12119962:7742501:C:T	7682441	7682441	0	3.58071e-17	0.218173	0.0228509	FALSE
cg26816564	chr1	7770993	7770992	rs4908694:7850898:C:T	7790838	7790838	0	5.241e-26	0.495104	0.0384708	FALSE
cg01444397	chr1	7784391	7784390	rs2071987	7773966	7773966	0	5.96618e-24	0.300299	0.0248161	FALSE
cg08764927	chr1	7784836	7784835	1:7856379:C:CT	7796319	7796319	0	4.1956e-07	0.168759	0.0318829	TRUE
cg00019458	chr1	7827883	7827882	rs2794666:7822009:A:G	7761949	7761949	0	2.18598e-10	-0.291864	0.0428491	TRUE
cg00864860	chr1	7847937	7847936	rs12092614:7865710:C:T	7805650	7805650	0	9.66439e-07	0.204674	0.0400536	FALSE
cg23631229	chr1	7902791	7902790	rs12059274:7955286:A:G	7895226	7895226	0	6.56624e-11	0.673192	0.0956753	FALSE
cg25007680	chr1	7961762	7961761	rs226249:8021778:T:C	7961718	7961718	0	4.00789e-07	0.0629845	0.0118771	FALSE
cg00845930	chr1	7961878	7961877	rs200968609:8021910:GGTGCTGGACGGTGTCCCT:G	7961850	7961868	0	2.42899e-26	1.04121	0.0801258	TRUE
cg08027640	chr1	7961886	7961885	rs7517357:8025275:C:T	7965215	7965215	0	4.3879e-19	0.932183	0.0907174	TRUE
cg00042356	chr1	7961903	7961902	exm-rs35675666	7961913	7961913	0	1.03409e-16	0.355208	0.0379065	FALSE
cg10385390	chr1	7962446	7962445	rs200968609:8021910:GGTGCTGGACGGTGTCCCT:G	7961850	7961868	0	6.96161e-09	-0.162176	0.0264024	TRUE
cg19295092	chr1	8031676	8031675	rs11589090:8525615:C:T	8465555	8465555	0	4.50193e-07	0.150446	0.0285055	TRUE
cg10227331	chr1	8121588	8121587	rs6577466	8122475	8122475	0	2.89752e-09	-0.135519	0.0214584	FALSE
cg19795711	chr1	8168324	8168323	rs149997714:7761132:T:C	7701072	7701072	0	1.89827e-07	0.481085	0.0880541	TRUE
cg12778220	chr1	8267417	8267416	rs444966:8327648:C:T	8267588	8267588	0	6.25888e-08	0.127169	0.0223235	FALSE
cg24453604	chr1	8302354	8302353	rs35288526:8361620:T:C	8301560	8301560	0	4.04944e-07	0.115096	0.0217131	TRUE
cg19243717	chr1	8302596	8302595	rs2120459:8360487:A:G	8300427	8300427	0	5.40739e-09	0.162917	0.0263085	FALSE
cg21855467	chr1	8317363	8317362	rs139529766:8906286:C:T	8846227	8846227	0	7.39282e-07	0.322854	0.0624566	TRUE
cg14413262	chr1	8323987	8323986	rs10864349:8392610:T:C	8332550	8332550	0	4.0969e-08	0.183073	0.0316505	FALSE
cg16484858	chr1	8424635	8424634	rs301819:8501786:A:G	8441726	8441726	0	3.30175e-09	-0.101541	0.0161438	FALSE
cg14004768	chr1	8424644	8424643	rs301819:8501786:A:G	8441726	8441726	0	8.55818e-11	-0.0891057	0.0127531	FALSE
cg03281911	chr1	8438685	8438684	rs880320:8427002:C:A	8366942	8366942	0	3.63884e-07	-0.180743	0.0339491	TRUE
cg17029193	chr1	8450548	8450547	rs4581300:8610505:T:G	8550446	8550446	0	1.24633e-08	-0.180072	0.029882	FALSE
cg00055811	chr1	8482953	8482952	rs61785830:8382403:C:G	8322343	8322343	0	5.14654e-07	-0.168905	0.0321806	TRUE
cg24276315	chr1	8483177	8483176	rs34947776:8586352:CT:C	8526293	8526294	0	2.78708e-10	-0.151586	0.0224054	TRUE
cg18507560	chr1	8526239	8526238	rs2297867	8526504	8526504	0	2.22709e-20	0.228542	0.0212324	FALSE
cg25722041	chr1	8563415	8563414	rs113605276:8623490:C:T	8563431	8563431	0	6.77875e-11	0.374244	0.0532329	FALSE
cg20609715	chr1	8598523	8598522	rs80243135:8542448:A:C	8482388	8482388	0	2.56119e-07	0.12418	0.0229983	FALSE
cg11157816	chr1	113979564	113979563	exm2264892	113973095	113973095	0	1.15937e-07	-0.095759	0.0171986	FALSE
cg07794010	chr1	114122996	114122995	rs60036991:114665502:TC:T	114122880	114122881	0	1.17867e-08	0.10352	0.0171467	FALSE
cg22193404	chr1	114130913	114130912	rs670495	114133007	114133007	0	5.64845e-08	-0.0935043	0.0163528	FALSE
cg22646710	chr1	114154177	114154176	rs497304	114166695	114166695	0	6.33978e-13	0.225722	0.0286622	FALSE
cg15976388	chr1	114154325	114154324	rs11582324:114697001:A:G	114154379	114154379	0	4.51113e-12	0.171724	0.0228196	FALSE
cg06620092	chr1	114154902	114154901	rs2774294:114711751:T:C	114169129	114169129	0	5.13035e-10	-0.127549	0.0191809	FALSE
cg17570981	chr1	114292451	114292450	rs11588687	114290788	114290788	0	4.57933e-18	0.441597	0.044655	FALSE
cg02157078	chr1	114346148	114346147	rs559692:114888832:T:G	114346210	114346210	0	7.29919e-08	-0.181519	0.0320439	FALSE
cg06840427	chr1	114407133	114407132	rs71580620:114991785:T:TA	114449163	114449163	0	4.00663e-18	-0.417975	0.0421721	TRUE
cg25190176	chr1	114758073	114758072	rs75868777:115095171:A:C	114552550	114552550	0	9.70412e-11	0.314379	0.045146	TRUE
cg09811183	chr1	115088895	115088894	rs140480511:115631400:G:GGGTA	115088779	115088779	0	5.18926e-16	0.174839	0.0192137	FALSE
cg01522456	chr1	115089616	115089615	rs10458452:115654244:T:G	115111623	115111623	0	8.96077e-17	0.246717	0.0262616	FALSE
cg14867388	chr1	115089633	115089632	rs10458452:115654244:T:G	115111623	115111623	0	2.82092e-14	0.947248	0.112519	FALSE
cg14867388	chr1	115089633	115089632	rs372212159:115407843:AT:A	114865222	114865223	1	8.52976e-10	-1.67616	0.255804	TRUE
cg15558982	chr1	115089642	115089641	rs1146163:115654025:C:G	115111404	115111404	0	1.6753e-13	0.334025	0.041191	TRUE
cg24780648	chr1	115099595	115099594	rs184979196:115017170:T:C	114474548	114474548	0	2.42039e-18	-0.867457	0.0867939	TRUE
cg12956284	chr1	115239109	115239108	rs11802268:115781583:C:T	115238962	115238962	0	2.57202e-08	0.107738	0.0183243	FALSE
cg09354782	chr1	115281766	115281765	rs6656381:115822465:T:A	115279844	115279844	0	1.87522e-09	0.114161	0.0178368	FALSE
cg04245104	chr1	115330750	115330749	rs67088159:115873351:TCACTC:T	115330730	115330735	0	2.26191e-08	-0.411238	0.0696346	TRUE
cg13894908	chr1	115470051	115470050	rs112864886:115990049:C:T	115447428	115447428	0	6.55577e-07	-0.286677	0.055176	TRUE
cg17989241	chr1	115680587	115680586	rs4571967	115677830	115677830	0	1.66258e-20	0.306601	0.0283586	FALSE
cg20115925	chr1	115764862	115764861	rs6684209:116250612:C:T	115707991	115707991	0	1.96186e-08	0.197563	0.0332904	FALSE
cg10290455	chr1	115768779	115768778	rs4484922:116310818:G:C	115768197	115768197	0	8.31277e-07	-0.172903	0.0336166	TRUE
cg04773714	chr1	115841094	115841093	rs7538287:116396653:C:T	115854032	115854032	0	1.68589e-07	-0.0826948	0.0150663	FALSE
cg08284931	chr1	115842488	115842487	rs12132597:116398304:T:C	115855683	115855683	0	5.90637e-16	0.202544	0.0223119	FALSE
cg20623690	chr1	115977697	115977696	rs2452551:116519957:C:T	115977336	115977336	0	2.2128e-07	-0.199306	0.0366991	TRUE
cg16942568	chr1	116018977	116018976	rs41313286:116676143:A:G	116133522	116133522	0	4.78957e-07	0.454685	0.0863713	TRUE
cg26678765	chr1	116110473	116110472	rs974938:115775139:G:T	115232518	115232518	0	1.2953e-08	0.265411	0.0441003	FALSE
cg00969087	chr1	116167711	116167710	rs55685906:116711288:T:C	116168667	116168667	0	2.64585e-08	-0.117684	0.0200357	FALSE
cg02855836	chr1	116167910	116167909	rs7521356:116711972:C:T	116169351	116169351	0	6.78188e-10	-0.211997	0.032138	FALSE
cg01824919	chr1	116168719	116168718	rs10754433:116712676:C:G	116170055	116170055	0	6.07678e-12	-0.207306	0.0277459	FALSE
cg03974764	chr1	116466454	116466453	rs41276566:117568093:G:T	117025471	117025471	0	2.34464e-08	-0.372143	0.0630927	TRUE
cg05149108	chr1	116467560	116467559	rs1176385:117027445:T:C	116484823	116484823	0	2.96333e-07	-0.203588	0.0379247	TRUE
cg15387962	chr1	116467623	116467622	rs1176386	116483534	116483534	0	4.56561e-07	-0.250704	0.0475292	TRUE
cg26868111	chr1	116537754	116537753	rs148077146:117136806:G:A	116594184	116594184	0	3.20511e-19	-1.96233	0.190014	TRUE
cg00247512	chr1	116572686	116572685	rs1335531:117115377:G:C	116572755	116572755	0	1.27846e-12	0.209483	0.027027	FALSE
cg18620631	chr1	116877572	116877571	rs10494190	116850318	116850318	0	1.81083e-06	-0.119671	0.0240816	FALSE
cg06854150	chr1	116961331	116961330	rs12029240:117537801:T:A	116995179	116995179	0	7.18447e-07	-0.427394	0.0825795	FALSE
cg11708721	chr1	116987388	116987387	rs1127215:117532790:C:T	116990168	116990168	0	1.58229e-06	0.101798	0.0203602	FALSE
cg27258066	chr1	117172515	117172514	rs6657810	117172404	117172404	0	5.59289e-14	0.177572	0.0213938	FALSE
cg20760394	chr1	117312562	117312561	rs73013841:117854911:C:T	117312289	117312289	0	1.06703e-13	0.299085	0.0365276	FALSE
cg11527107	chr1	117339864	117339863	1:117953245:GA:G	117410623	117410624	0	2.47773e-10	0.232903	0.0343118	TRUE
cg04848349	chr1	117340217	117340216	rs12127779:118017416:T:C	117474794	117474794	0	4.11594e-08	0.156372	0.0270387	FALSE
cg20383390	chr1	117366401	117366400	rs7540437:117911833:G:A	117369211	117369211	0	9.47627e-12	0.27492	0.0371956	FALSE
cg22947679	chr1	117366554	117366553	1:118001140:T:G	117458518	117458518	0	8.48741e-07	0.126411	0.0245994	TRUE
cg20538800	chr1	117535376	117535375	1:117899085:A:C	117356463	117356463	0	6.70039e-10	-0.181624	0.0275237	TRUE
cg15685385	chr1	117594612	117594611	rs11577386:118171690:T:C	117629068	117629068	0	2.53331e-17	-0.3507	0.036511	FALSE
cg20306265	chr1	117615003	117615002	rs34754277:118147892:T:C	117605270	117605270	0	4.07299e-18	-0.316062	0.0318982	FALSE
cg04720592	chr1	117623103	117623102	rs71766466:118170466:CTG:C	117627844	117627846	0	1.7421e-21	-0.33897	0.0303216	FALSE
cg22381395	chr1	117671953	117671952	rs6428706:118207698:A:T	117665076	117665076	0	5.15208e-10	0.139261	0.0209448	FALSE
cg25273091	chr1	118945592	118945591	rs57194612:119615776:CAAAAAAGAAAAAAA:C	119073153	119073167	0	1.27155e-07	0.118969	0.021442	TRUE
cg11391335	chr1	118979306	118979305	rs200574605:119568021:G:T	119025398	119025398	0	4.74827e-10	0.276543	0.0414947	TRUE
cg22378919	chr1	118979566	118979565	rs200574605:119568021:G:T	119025398	119025398	0	1.93172e-08	0.212737	0.0358284	TRUE
cg09789768	chr1	118981701	118981700	rs4659146:119645535:C:T	119102912	119102912	0	1.58549e-08	0.148434	0.0248316	FALSE
cg16990168	chr1	118983438	118983437	rs111875108:119715883:C:T	119173260	119173260	0	4.9211e-10	0.248331	0.0372997	FALSE
cg24720355	chr1	118983633	118983632	rs111875108:119715883:C:T	119173260	119173260	0	1.23467e-10	0.203048	0.0293479	FALSE
cg05172122	chr1	118984161	118984160	rs57194612:119615776:CAAAAAAGAAAAAAA:C	119073153	119073167	0	8.13255e-09	0.167916	0.0274754	TRUE
cg13080379	chr1	118984534	118984533	rs10923704:119492931:C:T	118950308	118950308	0	2.59016e-10	0.157894	0.0232901	FALSE
cg25755283	chr1	118988471	118988470	rs12408286:119652601:C:T	119109978	119109978	0	3.7288e-09	0.238284	0.0380286	FALSE
cg03760839	chr1	118989096	118989095	rs201588069:119565132:T:C	119022509	119022509	0	1.4651e-09	0.170697	0.0264721	TRUE
cg14565725	chr1	118989422	118989421	rs3790553:119579276:A:G	119036653	119036653	0	4.72951e-10	0.152269	0.0228451	TRUE
cg05940231	chr1	118989567	118989566	rs1886918:119536721:C:T	118994098	118994098	0	1.31815e-09	0.148798	0.023003	TRUE
cg25340966	chr1	118989573	118989572	rs200377126:119567019:A:C	119024396	119024396	0	5.78636e-08	0.200001	0.0350084	FALSE
cg25507958	chr1	118989611	118989610	rs3790553:119579276:A:G	119036653	119036653	0	9.22698e-09	0.200822	0.0329956	TRUE
cg02362103	chr1	118990151	118990150	rs188264330:119567788:T:C	119025165	119025165	0	7.9509e-07	0.169121	0.0328187	TRUE
cg21301805	chr1	118992022	118992021	rs6428789:119550480:A:C	119007857	119007857	0	1.06382e-10	0.210414	0.0302908	FALSE
cg09815769	chr1	118997116	118997115	rs12034909:119602381:A:T	119059758	119059758	0	2.93346e-14	0.263499	0.0313249	FALSE
cg14204462	chr1	118997422	118997421	rs200100774:119564215:G:A	119021592	119021592	0	1.23787e-18	0.384492	0.0380495	TRUE
cg26570165	chr1	118999211	118999210	rs201588069:119565132:T:C	119022509	119022509	0	3.89461e-24	0.551456	0.045312	FALSE
cg25386234	chr1	118999537	118999536	rs57194612:119615776:CAAAAAAGAAAAAAA:C	119073153	119073167	0	1.26948e-08	0.168616	0.0279982	TRUE
cg26856924	chr1	118999951	118999950	rs1886918:119536721:C:T	118994098	118994098	0	5.62621e-14	0.171179	0.0206261	FALSE
cg11649715	chr1	119000818	119000817	rs2765539:119549418:C:T	119006795	119006795	0	1.67239e-18	0.454844	0.0452336	FALSE
cg20247486	chr1	119001707	119001706	rs201324037:119716239:CT:C	119173616	119173617	0	6.24942e-11	0.209554	0.0297434	TRUE
cg06764239	chr1	119002150	119002149	rs3790553:119579276:A:G	119036653	119036653	0	7.34801e-18	0.388749	0.0396246	FALSE
cg17180237	chr1	119002653	119002652	rs12034909:119602381:A:T	119059758	119059758	0	2.3681e-12	0.847305	0.11089	FALSE
cg17180237	chr1	119002653	119002652	rs12026797:119569779:G:A	119027156	119027156	1	2.41908e-09	-1.43609	0.226132	FALSE
cg17479943	chr1	119004306	119004305	rs12567111:119613429:A:T	119070806	119070806	0	5.31721e-14	0.958544	0.115363	FALSE
cg17479943	chr1	119004306	119004305	rs12724798:119605218:C:T	119062595	119062595	1	2.6317e-09	-1.43428	0.226433	FALSE
cg04256202	chr1	119004376	119004375	rs12724798:119605218:C:T	119062595	119062595	0	2.46318e-13	-1.71364	0.213094	FALSE
cg04256202	chr1	119004376	119004375	rs12034909:119602381:A:T	119059758	119059758	1	1.19651e-08	0.707478	0.117243	FALSE
cg15724945	chr1	119005905	119005904	rs201079995:119564806:G:C	119022183	119022183	0	2.32645e-12	0.912393	0.119359	FALSE
cg15724945	chr1	119005905	119005904	rs12026797:119569779:G:A	119027156	119027156	1	9.34614e-10	-1.46863	0.224734	FALSE
cg09232478	chr1	119006230	119006229	rs200100774:119564215:G:A	119021592	119021592	0	6.48246e-21	0.488364	0.0445377	TRUE
cg10572355	chr1	119006523	119006522	rs148559913:119563857:A:G	119021234	119021234	0	6.68172e-14	0.259803	0.0314177	TRUE
cg13933734	chr1	119007862	119007861	rs5004515:119749139:G:A	119206516	119206516	0	8.53131e-10	0.298229	0.0455139	TRUE
cg03476613	chr1	119008052	119008051	rs57194612:119615776:CAAAAAAGAAAAAAA:C	119073153	119073167	0	8.25296e-08	0.110559	0.0196059	TRUE
cg15159324	chr1	119008232	119008231	rs12034909:119602381:A:T	119059758	119059758	0	2.99379e-11	0.148319	0.0206539	FALSE
cg14609025	chr1	119008361	119008360	rs12022745:119563416:A:G	119020793	119020793	0	1.79237e-08	0.398422	0.0669297	TRUE
cg09628195	chr1	119008681	119008680	rs188264330:119567788:T:C	119025165	119025165	0	3.64885e-17	0.907236	0.0950526	TRUE
cg09628195	chr1	119008681	119008680	rs10923743:119612632:C:T	119070009	119070009	1	2.61415e-08	-0.638261	0.108618	FALSE
cg18261050	chr1	119008697	119008696	rs188264330:119567788:T:C	119025165	119025165	0	1.58663e-09	0.186015	0.0289169	TRUE
cg13573036	chr1	119009229	119009228	rs200574605:119568021:G:T	119025398	119025398	0	4.12084e-11	1.04787	0.147123	TRUE
cg13573036	chr1	119009229	119009228	rs12026797:119569779:G:A	119027156	119027156	1	2.38672e-09	-1.43656	0.226112	FALSE
cg24053992	chr1	119011942	119011941	rs6669254:119601091:C:T	119058468	119058468	0	1.53027e-06	-0.150271	0.0300101	TRUE
cg19316303	chr1	119140423	119140422	rs10923754	119126017	119126017	0	1.45735e-12	0.147279	0.0190589	FALSE
cg13512890	chr1	119141352	119141351	rs61319010:119743011:T:A	119200388	119200388	0	1.10929e-18	0.393814	0.0389025	TRUE
cg05288837	chr1	119337484	119337483	rs116411856:119701541:G:A	119158918	119158918	0	6.9793e-08	0.87887	0.154894	TRUE
cg25216580	chr1	119631367	119631366	rs147849165:120174206:CCCCCGCTTGGG:C	119631583	119631594	0	1.65498e-08	-0.131316	0.0219999	FALSE
cg00464946	chr1	119652416	119652415	rs377033:120196652:C:G	119654029	119654029	0	8.31922e-13	-0.204729	0.0261562	FALSE
cg09247623	chr1	119659607	119659606	rs561931:120254506:A:G	119711883	119711883	0	8.71847e-07	-0.10947	0.0213274	TRUE
cg20485607	chr1	119675074	119675073	rs561931:120254506:A:G	119711883	119711883	0	2.0532e-47	2.18281	0.102047	FALSE
cg20995928	chr1	119687241	119687240	rs10218713:120247899:A:G	119705276	119705276	0	8.47034e-09	0.124836	0.0204535	FALSE
cg19096424	chr1	119712482	119712481	rs477992	119714953	119714953	0	1.44771e-18	0.253344	0.0251352	FALSE
cg06763568	chr1	119742246	119742245	rs517237:120284988:T:C	119742365	119742365	0	4.51293e-10	-0.14391	0.0215621	FALSE
cg00950384	chr1	119766306	119766305	rs10685746:120304984:A:AGG	119762361	119762361	0	1.50125e-06	0.135674	0.0270716	TRUE
cg23019889	chr1	147072497	147072496	rs143142003:146537673:G:C	147066129	147066129	0	1.10695e-08	0.198662	0.0328373	FALSE
cg26010182	chr1	147241844	147241843	rs182893885:146833714:T:C	147362002	147362002	0	1.04564e-25	-1.45232	0.113842	TRUE
cg07572770	chr1	147242267	147242266	rs12092016:146716994:C:G	147245342	147245342	0	1.2834e-11	0.243161	0.033146	FALSE
cg21917976	chr1	147242310	147242309	rs12092016:146716994:C:G	147245342	147245342	0	8.26997e-13	0.177657	0.0226944	FALSE
cg11120551	chr1	147242347	147242346	rs12092016:146716994:C:G	147245342	147245342	0	6.09879e-13	0.172255	0.021854	FALSE
cg11983977	chr1	147242370	147242369	rs12092016:146716994:C:G	147245342	147245342	0	3.75266e-17	0.303415	0.0318048	FALSE
cg14210988	chr1	147491512	147491511	rs2803527:146940469:C:A	147468724	147468724	0	2.00986e-14	0.308293	0.0363681	FALSE
cg10020892	chr1	147545132	147545131	rs656323:147017140:T:C	147545370	147545370	0	1.17586e-06	-0.180155	0.035559	TRUE
cg27546670	chr1	147774728	147774727	rs12408247	147772337	147772337	0	1.37203e-19	-0.425348	0.0406392	FALSE
cg25862444	chr1	148264742	148264741	rs10752440:147785038:C:T	148312930	148312930	0	9.09531e-16	0.310761	0.03451	FALSE
cg24346776	chr1	148264750	148264749	rs7554334:147761344:T:C	148289238	148289238	0	1.01615e-11	0.256789	0.0348023	FALSE
cg22697853	chr1	148264934	148264933	rs7519981:147777876:C:G	148305768	148305768	0	2.19874e-09	0.237363	0.0372667	FALSE
cg23403636	chr1	148309105	148309104	rs539114:147807110:A:T	148334986	148334986	0	7.63369e-20	-0.439732	0.0416316	TRUE
cg18140268	chr1	148309720	148309719	rs488014:147818267:C:G	148346139	148346139	0	6.16647e-13	-0.316681	0.0401871	FALSE
cg23206461	chr1	148310009	148310008	rs553657:147783826:A:T	148311718	148311718	0	1.82566e-14	-0.283922	0.033428	FALSE
cg13392957	chr1	148310172	148310171	rs553657:147783826:A:T	148311718	148311718	0	2.24807e-12	-0.234781	0.0306893	FALSE
cg13067553	chr1	148310345	148310344	rs7519981:147777876:C:G	148305768	148305768	0	7.87559e-12	0.205874	0.0277282	FALSE
cg03242265	chr1	148310365	148310364	rs526708:147822212:T:C	148350084	148350084	0	1.03272e-12	-0.316602	0.0406483	FALSE
cg25200152	chr1	148318343	148318342	rs509493:147822005:A:G	148349877	148349877	0	5.46446e-11	-0.341722	0.0483325	FALSE
cg06804778	chr1	148318543	148318542	rs1855791:147820816:G:A	148348688	148348688	0	9.03677e-11	-0.191872	0.0275011	FALSE
cg10207181	chr1	148328966	148328965	rs539114:147807110:A:T	148334986	148334986	0	6.01263e-07	-0.0907097	0.0173952	FALSE
cg03951833	chr1	148328979	148328978	rs539114:147807110:A:T	148334986	148334986	0	1.84805e-10	-0.306541	0.044796	TRUE
cg03102494	chr1	148329597	148329596	rs1855791:147820816:G:A	148348688	148348688	0	3.89448e-11	-0.27906	0.0391236	TRUE
cg17476910	chr1	148334049	148334048	rs539114:147807110:A:T	148334986	148334986	0	8.68243e-20	-0.446566	0.0423631	FALSE
cg21919968	chr1	148351298	148351297	rs1582087:147822261:G:A	148350133	148350133	0	6.66127e-18	-0.210609	0.0214316	FALSE
cg13502125	chr1	148354064	148354063	rs76197525:147793344:G:A	148321245	148321245	0	1.5335e-19	-0.439559	0.0420702	FALSE
cg12099459	chr1	148354775	148354774	rs76197525:147793344:G:A	148321245	148321245	0	7.67741e-14	-0.376708	0.0456883	FALSE
cg24629122	chr1	149917779	149917778	rs3738319	149843756	149843756	0	3.09994e-08	0.216177	0.0370078	TRUE
cg01705587	chr1	149917813	149917812	rs3738319	149843756	149843756	0	3.05583e-08	0.213301	0.036497	FALSE
cg05467523	chr1	149917993	149917992	rs201115858:149846941:A:T	149875391	149875391	0	7.60186e-09	0.247349	0.0403837	TRUE
cg17353890	chr1	149936861	149936860	rs145902781:150833444:AAAG:A	150860968	150860971	0	6.59671e-07	0.331609	0.0638408	TRUE
cg20292245	chr1	150050784	150050783	rs6687454:149999764:T:A	150027806	150027806	0	4.06017e-13	-0.248268	0.0312135	FALSE
cg00499787	chr1	150187663	150187662	rs2027349	150067621	150067621	0	3.41968e-08	-0.166896	0.0286698	FALSE
cg19320294	chr1	150257477	150257476	rs61819176:150963510:G:T	150991034	150991034	0	2.38613e-06	-0.320225	0.065261	TRUE
cg02596550	chr1	150260739	150260738	rs35938158:150213828:T:C	150241470	150241470	0	1.37289e-07	-0.150273	0.0271632	TRUE
cg18529259	chr1	150283471	150283470	rs2318761:150257714:A:G	150285304	150285304	0	1.79111e-09	-0.193835	0.0302432	FALSE
cg03813961	chr1	150362860	150362859	1:150299531:C:CT	150327072	150327072	0	5.67618e-09	-0.434279	0.0702379	TRUE
cg26738728	chr1	150362913	150362912	rs11584070:150294925:A:G	150322476	150322476	0	4.31955e-11	-0.465883	0.065491	TRUE
cg10185505	chr1	150363021	150363020	1:150299531:C:CT	150327072	150327072	0	5.88344e-13	-1.36417	0.172933	TRUE
cg10185505	chr1	150363021	150363020	rs11810447:151048964:G:A	151076488	151076488	1	4.52563e-07	-0.67706	0.128313	TRUE
cg25066665	chr1	150363032	150363031	rs11578585:150354578:G:A	150382102	150382102	0	1.58352e-11	-0.446919	0.0612404	FALSE
cg08667682	chr1	150363295	150363294	rs113035859:150353736:C:CA	150381260	150381260	0	9.14585e-09	-0.300347	0.0493336	TRUE
cg11424069	chr1	150363975	150363974	rs6657461:150441950:T:A	150469474	150469474	0	4.51366e-18	-0.227585	0.0230082	FALSE
cg09082263	chr1	150487682	150487681	rs834239:150375458:C:A	150402982	150402982	0	9.34558e-24	0.209637	0.0174288	TRUE
cg03851496	chr1	150516330	150516329	rs10712406:150488722:CA:C	150516246	150516247	0	2.3582e-09	-0.123251	0.0193923	TRUE
cg08130307	chr1	150538150	150538149	rs1776270:150369337:G:A	150396861	150396861	0	2.47109e-24	-0.210427	0.0171861	FALSE
cg13175981	chr1	150579907	150579906	rs12139563:150578241:A:G	150605765	150605765	0	4.39399e-27	0.168895	0.0127247	FALSE
cg04414720	chr1	150697721	150697720	rs7529194:150622620:T:A	150650144	150650144	0	1.92168e-28	0.520654	0.0377727	FALSE
cg09365446	chr1	150697947	150697946	rs34154301:150672168:T:TG	150699692	150699692	0	5.19435e-31	0.417365	0.0282838	FALSE
cg15441434	chr1	150925917	150925916	rs71580345:150926002:C:CA	150953526	150953526	0	2.92189e-10	0.228114	0.0337614	TRUE
cg10589385	chr1	150925962	150925961	rs138981555:150798321:TA:T	150825845	150825846	0	2.70023e-13	0.357435	0.044537	FALSE
cg26257645	chr1	151070329	151070328	rs11810447:151048964:G:A	151076488	151076488	0	3.75023e-08	0.14654	0.0252551	FALSE
cg13181291	chr1	151117107	151117106	rs75645053:151880098:C:A	151907622	151907622	0	7.18903e-08	0.557617	0.0983822	TRUE
cg03879730	chr1	151253562	151253561	rs4971026:151234301:T:C	151261825	151261825	0	4.9781e-31	0.53235	0.0360589	FALSE
cg18515587	chr1	151372331	151372330	rs5777773:151351368:C:CATTTT	151378892	151378892	0	9.04503e-08	-0.191697	0.0341102	FALSE
cg18801370	chr1	151458017	151458016	rs12071705:151430504:G:C	151458028	151458028	0	2.15395e-22	0.309829	0.0268973	FALSE
cg17277896	chr1	151473066	151473065	rs144944427:151444964:CTT:C	151472488	151472490	0	1.70167e-08	-0.138578	0.0232383	TRUE
cg21954824	chr1	151479081	151479080	rs11204826:151451346:T:C	151478870	151478870	0	2.68535e-09	-0.133307	0.0210586	FALSE
cg13462599	chr1	151511736	151511735	rs2211435:151471971:C:A	151499495	151499495	0	3.66929e-10	0.133385	0.019868	FALSE
cg03011500	chr1	151511768	151511767	rs10788807:151477312:G:A	151504836	151504836	0	9.84222e-21	0.207643	0.0190549	FALSE
cg21028145	chr1	151540353	151540352	rs72692715:151519352:C:T	151546876	151546876	0	5.33326e-29	0.534425	0.0381901	FALSE
cg05838011	chr1	151540359	151540358	rs17640598	151551799	151551799	0	3.61113e-09	0.118111	0.0188309	FALSE
cg16414821	chr1	151544303	151544302	1:151527166:G:GC	151554690	151554690	0	2.22662e-09	0.188509	0.0296079	FALSE
cg04446723	chr1	151700204	151700203	rs3466:151672658:C:T	151700182	151700182	0	5.06573e-12	-0.149639	0.0199402	FALSE
cg11690979	chr1	151721845	151721844	rs11586446:151712488:A:G	151740012	151740012	0	3.09843e-12	-0.319141	0.0420321	FALSE
cg01609658	chr1	151722003	151722002	rs17568246:151736456:A:G	151763980	151763980	0	3.83363e-24	0.633073	0.0520074	FALSE
cg05906443	chr1	151722096	151722095	rs12567867:151781328:A:G	151808852	151808852	0	4.15117e-07	0.154215	0.0291224	TRUE
cg23864823	chr1	151763780	151763779	rs10888429:151725345:G:T	151752869	151752869	0	6.57934e-19	0.187403	0.0183564	FALSE
cg24153003	chr1	151764206	151764205	rs59622133:151719619:CT:C	151747143	151747144	0	4.66666e-09	0.158902	0.0255399	TRUE
cg12582028	chr1	151764224	151764223	rs1196467:151710038:T:C	151737562	151737562	0	6.47416e-15	0.326265	0.0376257	TRUE
cg01698998	chr1	151770194	151770193	rs6587616:151703940:C:T	151731464	151731464	0	4.15499e-07	0.106323	0.020079	TRUE
cg07092448	chr1	151790738	151790737	rs1521185:151764049:A:G	151791573	151791573	0	5.16238e-27	0.525309	0.0396557	FALSE
cg13563504	chr1	151805780	151805779	rs2293088:151777651:G:A	151805175	151805175	0	5.38425e-08	-0.123269	0.021521	FALSE
cg07206827	chr1	151805929	151805928	rs11585294:151769887:A:C	151797411	151797411	0	3.18863e-08	0.152517	0.0261355	FALSE
cg24545100	chr1	151806182	151806181	rs10888435:151772475:A:G	151799999	151799999	0	1.32655e-11	-0.21116	0.0288074	FALSE
cg14134508	chr1	151806320	151806319	rs2293088:151777651:G:A	151805175	151805175	0	5.94483e-09	-0.157024	0.0254338	FALSE
cg08566367	chr1	151809746	151809745	rs939594:151783597:C:T	151811121	151811121	0	5.60346e-11	0.167886	0.023761	FALSE
cg02493846	chr1	151837059	151837058	rs10888439:151812032:C:T	151839556	151839556	0	5.3247e-07	0.159045	0.030345	FALSE
cg00036347	chr1	151839448	151839447	rs2130529:151816049:A:C	151843573	151843573	0	8.38883e-07	-0.145092	0.0282205	FALSE
cg01062247	chr1	151853499	151853498	rs7556386:151825991:G:T	151853515	151853515	0	6.04078e-08	0.108274	0.0189821	FALSE
cg26935976	chr1	151972710	151972709	rs34457813:151898453:AT:A	151925977	151925978	0	1.29037e-06	-0.241852	0.0479333	TRUE
cg27310092	chr1	151973188	151973187	rs6667458:152147305:C:A	152174829	152174829	0	1.2391e-06	-0.173481	0.0343209	FALSE
cg21163489	chr1	151992744	151992743	rs2337689:151936629:T:C	151964153	151964153	0	4.65032e-10	-0.185791	0.027861	TRUE
cg19400001	chr1	152116614	152116613	rs12032307:152209612:A:G	152237136	152237136	0	3.6962e-07	-0.15776	0.0296509	FALSE
cg15025200	chr1	152188762	152188761	rs146830974:152238688:G:A	152266212	152266212	0	1.04605e-11	0.333732	0.0452625	TRUE
cg23107878	chr1	152188922	152188921	rs146830974:152238688:G:A	152266212	152266212	0	1.09912e-13	0.411059	0.0502348	TRUE
cg26320663	chr1	152189046	152189045	rs146830974:152238688:G:A	152266212	152266212	0	3.23881e-11	0.95659	0.133477	TRUE
cg26320663	chr1	152189046	152189045	rs4845425:152195034:G:A	152222558	152222558	1	1.13568e-06	0.560278	0.110419	FALSE
cg09127314	chr1	152189208	152189207	rs146830974:152238688:G:A	152266212	152266212	0	6.29106e-10	0.899668	0.13609	TRUE
cg09127314	chr1	152189208	152189207	rs4845425:152195034:G:A	152222558	152222558	1	5.6601e-08	0.619207	0.1083	FALSE
cg02754945	chr1	152189410	152189409	rs146830974:152238688:G:A	152266212	152266212	0	5.49929e-15	0.48392	0.055628	TRUE
cg13498757	chr1	152189452	152189451	rs146830974:152238688:G:A	152266212	152266212	0	2.03354e-12	1.00512	0.131077	TRUE
cg13498757	chr1	152189452	152189451	rs10443208:152226383:A:T	152253907	152253907	1	1.49846e-07	-0.724617	0.131421	FALSE
cg21280320	chr1	152189550	152189549	rs146830974:152238688:G:A	152266212	152266212	0	1.04914e-14	0.642519	0.0748099	TRUE
cg18273593	chr1	152211087	152211086	1:152210468:G:GTA	152237992	152237992	0	2.77369e-10	0.301682	0.0445845	TRUE
cg26020982	chr1	152223631	152223630	rs4845425:152195034:G:A	152222558	152222558	0	2.61947e-13	-0.802678	0.0999488	FALSE
cg26020982	chr1	152223631	152223630	rs12046937:152229109:C:T	152256633	152256633	1	5.16867e-07	0.626269	0.119341	FALSE
cg00888758	chr1	152224199	152224198	rs4845425:152195034:G:A	152222558	152222558	0	4.33004e-14	-0.824216	0.0987733	FALSE
cg00888758	chr1	152224199	152224198	rs10788825:152161709:G:A	152189233	152189233	1	2.76443e-07	0.597471	0.110989	FALSE
cg22719314	chr1	152317859	152317858	rs4845425:152195034:G:A	152222558	152222558	0	3.81632e-13	-0.447492	0.056184	FALSE
cg24914149	chr1	152326235	152326234	rs4845425:152195034:G:A	152222558	152222558	0	1.25292e-10	-0.174118	0.0251765	FALSE
cg24529535	chr1	152348565	152348564	rs10443208:152226383:A:T	152253907	152253907	0	3.08223e-10	0.385778	0.0571813	FALSE
cg20694572	chr1	152359054	152359053	rs1496042:152159773:C:T	152187297	152187297	0	7.20456e-08	0.230048	0.0405913	FALSE
cg09067269	chr1	152372533	152372532	rs61815460:152216342:A:C	152243866	152243866	0	2.80286e-08	-0.293609	0.0500869	FALSE
cg19933610	chr1	152373832	152373831	rs10443208:152226383:A:T	152253907	152253907	0	1.21644e-06	0.315087	0.062285	FALSE
cg23919288	chr1	152393168	152393167	rs4845425:152195034:G:A	152222558	152222558	0	2.09274e-13	-0.321687	0.0398609	FALSE
cg08912276	chr1	152399242	152399241	rs72698999:152452246:A:G	152479770	152479770	0	9.74706e-14	-0.277773	0.0338597	FALSE
cg13950578	chr1	152495269	152495268	rs12123907:152467751:G:A	152495275	152495275	0	4.91983e-23	0.716976	0.0609742	TRUE
cg09873164	chr1	152515618	152515617	rs4240882:152456358:G:C	152483882	152483882	0	1.78643e-10	0.179064	0.026143	FALSE
cg23254163	chr1	152534367	152534366	rs4845785:152510143:C:T	152537667	152537667	0	1.33458e-09	0.183621	0.0283969	FALSE
cg20991723	chr1	152534447	152534446	rs6658925:152482801:A:G	152510325	152510325	0	2.31204e-13	0.28319	0.0351667	FALSE
cg23724738	chr1	152565905	152565904	rs11205105:152757741:C:T	152785265	152785265	0	1.73136e-07	0.312426	0.05698	FALSE
cg20232307	chr1	152567278	152567277	rs512208:152552285:C:A	152579809	152579809	0	3.73542e-10	0.287378	0.0428274	FALSE
cg24384181	chr1	152568109	152568108	rs12081753:152593844:C:T	152621368	152621368	0	4.94094e-08	0.237786	0.0413857	TRUE
cg17242116	chr1	152582712	152582711	rs111543341:152589499:A:G	152617023	152617023	0	1.07097e-07	0.198293	0.0355076	TRUE
cg04982938	chr1	152585691	152585690	rs201870857:152589312:A:T	152616836	152616836	0	2.16879e-08	0.284379	0.0480841	TRUE
cg12650227	chr1	152600455	152600454	rs201627679:152588246:A:G	152615770	152615770	0	9.19564e-08	-0.338766	0.0603165	TRUE
cg09394134	chr1	152612391	152612390	rs6677595	152617711	152617711	0	4.15765e-13	0.744781	0.0936868	TRUE
cg16789847	chr1	152614013	152614012	rs4845450:152591200:T:C	152618724	152618724	0	6.19159e-15	-0.431758	0.0497476	TRUE
cg26135325	chr1	152622847	152622846	rs35131831:152608595:G:GA	152636119	152636119	0	2.52305e-08	-0.12536	0.0213074	FALSE
cg26466858	chr1	152623367	152623366	rs75196578:152588529:A:C	152616053	152616053	0	4.26427e-11	0.140414	0.019732	TRUE
cg13071333	chr1	152623407	152623406	rs7545817:152607331:G:T	152634855	152634855	0	1.41365e-06	0.145329	0.0289203	FALSE
cg07821297	chr1	152623702	152623701	rs201852806:152589963:T:TGCA	152617487	152617487	0	2.40923e-08	0.109069	0.0185088	FALSE
cg08378913	chr1	152626919	152626918	rs35655600:152599002:CT:C	152626526	152626527	0	2.15639e-30	0.744321	0.0512574	TRUE
cg02493487	chr1	152654175	152654174	rs12239456:152613593:T:G	152641117	152641117	0	1.3539e-08	0.224496	0.0373573	FALSE
cg00204728	chr1	152662764	152662763	rs75196578:152588529:A:C	152616053	152616053	0	1.56416e-06	0.190915	0.0381645	TRUE
cg24332770	chr1	152685812	152685811	rs75196578:152588529:A:C	152616053	152616053	0	6.60301e-09	0.256185	0.041636	TRUE
cg22616525	chr1	152697510	152697509	rs75196578:152588529:A:C	152616053	152616053	0	4.7631e-09	0.255019	0.0410152	TRUE
cg16354520	chr1	152699232	152699231	rs75196578:152588529:A:C	152616053	152616053	0	3.97311e-07	0.202428	0.0381586	TRUE
cg23027387	chr1	152706689	152706688	rs989834:152618544:A:T	152646068	152646068	0	2.94687e-09	0.41214	0.0652937	FALSE
cg21347427	chr1	152717235	152717234	rs80154606:152688119:T:C	152715643	152715643	0	4.44267e-07	0.544453	0.103103	TRUE
cg04755954	chr1	152718822	152718821	rs6143428:152681680:C:CAGCTCTGGGGGCTGCTGT	152709204	152709204	0	1.56064e-07	0.172554	0.0313444	TRUE
cg08895932	chr1	152806105	152806104	rs4845488:152778576:G:A	152806100	152806100	0	2.66406e-11	-0.284944	0.0395612	FALSE
cg00647966	chr1	152871532	152871531	rs6587710:152870716:A:G	152898240	152898240	0	3.0027e-12	-0.198368	0.0261064	FALSE
cg04546999	chr1	152983954	152983953	rs3737864:153029137:C:T	153056661	153056661	0	1.03519e-13	-0.386586	0.0471838	TRUE
cg25856811	chr1	153001482	153001481	rs2937263:153006756:T:C	153034280	153034280	0	4.88075e-07	-0.123901	0.0235544	FALSE
cg17572196	chr1	153216830	153216829	rs12564527:152941309:G:T	152968833	152968833	0	8.08573e-08	0.232155	0.0411376	FALSE
cg01798266	chr1	153347939	153347938	rs821432:153311960:A:G	153339484	153339484	0	4.22643e-09	-0.198913	0.0318708	FALSE
cg26844457	chr1	153347990	153347989	rs821421:153283523:T:G	153311047	153311047	0	5.87754e-14	-0.243631	0.029383	FALSE
cg27653765	chr1	153348168	153348167	rs5777857:153312250:GA:G	153339774	153339775	0	1.65258e-26	-1.09962	0.084215	TRUE
cg10215274	chr1	153348188	153348187	rs821410:153295136:T:G	153322660	153322660	0	1.7493e-14	-0.519901	0.0611583	TRUE
cg03277515	chr1	153348723	153348722	rs4845345:153324212:T:G	153351736	153351736	0	1.89477e-11	-0.1669	0.022973	FALSE
cg06954535	chr1	153349536	153349535	rs3014863:153315579:A:G	153343103	153343103	0	2.83282e-10	0.160686	0.0237612	FALSE
cg15998505	chr1	153507226	153507225	rs6696893:153479481:C:G	153507005	153507005	0	8.43407e-09	-0.333279	0.0545977	FALSE
cg27052234	chr1	153533475	153533474	exm2231338	153541765	153541765	0	1.31621e-06	0.262996	0.0521698	FALSE
cg17714793	chr1	153565956	153565955	rs2071576:153538449:C:T	153565973	153565973	0	2.22868e-07	-0.164818	0.0303572	TRUE
cg09207613	chr1	153613026	153613025	rs41264642:153392663:G:A	153420187	153420187	0	1.56983e-06	-0.236934	0.0473715	TRUE
cg16282977	chr1	153617046	153617045	rs28754733:153598094:T:C	153625618	153625618	0	2.72894e-17	-0.185621	0.0193497	FALSE
cg15104031	chr1	153617053	153617052	rs56366330:153584332:G:GGTTGTGAGGTAACCC	153611856	153611856	0	2.43686e-16	-0.167436	0.0181466	TRUE
cg16348003	chr1	153617306	153617305	rs11548102:153587256:A:T	153614780	153614780	0	1.19961e-19	0.255287	0.0243399	FALSE
cg08477332	chr1	153617768	153617767	rs9726753:153591652:G:A	153619176	153619176	0	8.37221e-37	0.877411	0.0516104	FALSE
cg13946767	chr1	153627196	153627195	rs9729773:153594623:A:G	153622147	153622147	0	2.77713e-07	0.0829335	0.0154089	FALSE
cg11343894	chr1	153627229	153627228	rs36115422:153646446:CT:C	153673970	153673971	0	2.45755e-10	0.135069	0.0198941	TRUE
cg27469660	chr1	153627234	153627233	rs35890519:153597117:GAA:G	153624641	153624643	0	5.68003e-11	0.164744	0.0233247	TRUE
cg11915664	chr1	153627294	153627293	rs9729773:153594623:A:G	153622147	153622147	0	1.78643e-15	0.164469	0.0184991	TRUE
cg11596404	chr1	153627297	153627296	rs9729773:153594623:A:G	153622147	153622147	0	1.53725e-13	0.189191	0.0232873	FALSE
cg02873163	chr1	153627354	153627353	rs35760493:153596603:G:A	153624127	153624127	0	3.55273e-09	0.195285	0.0311191	FALSE
cg02331910	chr1	153627356	153627355	rs999418:153600124:T:C	153627648	153627648	0	1.59312e-09	0.144143	0.0224104	FALSE
cg04077668	chr1	153627589	153627588	rs9729773:153594623:A:G	153622147	153622147	0	8.21645e-17	0.156939	0.0166796	FALSE
cg01347250	chr1	153627677	153627676	rs35890519:153597117:GAA:G	153624641	153624643	0	3.08699e-16	0.216168	0.0235294	TRUE
cg26148377	chr1	153633240	153633239	rs1046381:153604112:G:A	153631636	153631636	0	3.46568e-19	-0.332067	0.0321944	FALSE
cg26548293	chr1	153633703	153633702	rs1046381:153604112:G:A	153631636	153631636	0	2.63977e-20	-0.29919	0.0278677	FALSE
cg22176994	chr1	153633865	153633864	rs11264236:153658480:G:A	153686004	153686004	0	1.45932e-06	0.118792	0.023673	FALSE
cg22861691	chr1	153671347	153671346	rs6674929:153648661:A:G	153676185	153676185	0	4.00562e-10	0.0937776	0.0140032	FALSE
cg25741879	chr1	153783693	153783692	rs34121084:153760045:ATACT:A	153787569	153787573	0	2.13393e-07	0.166693	0.0306501	TRUE
cg11757484	chr1	39669209	39669208	1:40140924:A:AG	39675252	39675252	0	9.58779e-08	-0.183496	0.032722	TRUE
cg10052561	chr1	39671514	39671513	rs536003:40154898:G:A	39689226	39689226	0	2.50075e-07	0.196162	0.036295	FALSE
cg19509030	chr1	39672242	39672241	rs784597:40136070:C:G	39670398	39670398	0	4.09315e-10	-0.0961897	0.0143722	TRUE
cg01656955	chr1	39672295	39672294	rs1568146:40136928:C:T	39671256	39671256	0	6.53315e-10	-0.153133	0.0231893	FALSE
cg00990022	chr1	39672381	39672380	rs60241113:40112820:A:G	39647148	39647148	0	1.88475e-08	-0.187259	0.031511	FALSE
cg06209491	chr1	39672731	39672730	rs34131880:40121746:AG:A	39656074	39656075	0	3.08756e-13	-0.152235	0.0190245	FALSE
cg16837016	chr1	39688075	39688074	rs502910:40153531:A:C	39687859	39687859	0	6.26746e-17	0.499983	0.0528841	FALSE
cg15901364	chr1	39689322	39689321	rs59796683:40156767:T:C	39691095	39691095	0	5.26591e-07	-0.136116	0.0259582	TRUE
cg24920358	chr1	39738614	39738613	rs1046988	39753393	39753393	0	6.85448e-25	0.339609	0.0272733	FALSE
cg02773041	chr1	39738713	39738712	rs1046988	39753393	39753393	0	1.5477e-14	0.147795	0.0173428	FALSE
cg07883627	chr1	39738722	39738721	rs1046988	39753393	39753393	0	4.42558e-23	0.208	0.0176632	FALSE
cg17748822	chr1	39768370	39768369	rs230329:40253786:C:T	39788114	39788114	0	8.89988e-14	-0.217539	0.0264663	FALSE
cg18217145	chr1	39789024	39789023	rs126821:40253029:T:G	39787357	39787357	0	4.29154e-10	0.145296	0.0217387	FALSE
cg08551248	chr1	39789458	39789457	rs10158739:40183702:G:A	39718030	39718030	0	1.01188e-07	0.304587	0.0544251	TRUE
cg25107984	chr1	39793031	39793030	rs34325997:40262063:AAT:A	39796391	39796393	0	7.23953e-11	-0.268603	0.0382729	TRUE
cg04921771	chr1	39884016	39884015	rs6657848:40373232:A:G	39907560	39907560	0	5.84853e-09	0.349023	0.0565032	FALSE
cg10448144	chr1	39919273	39919272	rs142215506:40372928:AT:A	39907256	39907257	0	7.91733e-10	-0.224744	0.0342242	TRUE
cg04218880	chr1	39922593	39922592	rs7539338:40390361:C:G	39924689	39924689	0	4.58605e-12	-0.139272	0.0185145	FALSE
cg15196156	chr1	39922724	39922723	rs7539338:40390361:C:G	39924689	39924689	0	3.38707e-09	-0.151583	0.024119	FALSE
cg00695362	chr1	40040541	40040540	rs3131684:40512591:C:T	40046919	40046919	0	7.25953e-18	0.217745	0.0221898	FALSE
cg08659293	chr1	40041031	40041030	rs201693731:40495101:C:A	40029429	40029429	0	1.49214e-08	0.107012	0.0178656	TRUE
cg23639565	chr1	40042186	40042185	rs11806616:40507145:C:A	40041473	40041473	0	3.42296e-08	0.287969	0.0494698	FALSE
cg16555417	chr1	40133101	40133100	rs4492609	40133103	40133103	0	5.23728e-14	0.369157	0.0444148	FALSE
cg08166631	chr1	40133340	40133339	rs112323754:40626344:CAGG:C	40160672	40160675	0	1.5954e-15	0.282969	0.0317592	TRUE
cg08707192	chr1	40161275	40161274	rs11807468:40443627:C:T	39977955	39977955	0	2.5188e-07	0.179015	0.0331318	FALSE
cg22536963	chr1	40221565	40221564	rs34668921:40575514:G:A	40109842	40109842	0	1.15766e-08	0.267816	0.0443337	FALSE
cg20145692	chr1	40315618	40315617	rs111700365:40781175:CG:C	40315503	40315504	0	2.86925e-09	0.380729	0.0602674	TRUE
cg15876071	chr1	40344167	40344166	rs442418:40807033:T:C	40341361	40341361	0	3.82313e-10	0.247987	0.0369813	FALSE
cg01757525	chr1	40477715	40477714	rs4660167:41034811:T:C	40569139	40569139	0	1.06073e-06	0.178283	0.0350308	TRUE
cg09825488	chr1	40508335	40508334	rs148588691:40942698:C:CTGAA	40477026	40477026	0	3.77591e-08	0.181353	0.0312625	TRUE
cg21562355	chr1	40688712	40688711	rs12027614:41143186:C:T	40677514	40677514	0	9.2449e-10	0.12724	0.0194644	TRUE
cg15920552	chr1	40735110	40735109	rs12743517:41225354:A:C	40759682	40759682	0	1.93713e-12	-0.300636	0.0391614	FALSE
cg24884207	chr1	40783535	40783534	rs2769257:41249242:G:T	40783570	40783570	0	7.35647e-08	0.118789	0.0209761	FALSE
cg18812909	chr1	40862607	40862606	rs913382	40858210	40858210	0	2.57532e-10	0.154009	0.0227134	FALSE
cg17590083	chr1	40899059	40899058	rs58619864:41373221:CA:C	40907549	40907550	0	6.68079e-10	-0.203255	0.0307992	FALSE
cg02290550	chr1	41021646	41021645	rs139168471:41522949:G:T	41057277	41057277	0	1.25528e-08	0.161306	0.0267743	FALSE
cg02442501	chr1	41163115	41163114	rs17357905:41484317:T:C	41018645	41018645	0	1.1551e-09	0.155336	0.0239194	TRUE
cg22491976	chr1	41241973	41241972	rs35883594:41744093:A:G	41278421	41278421	0	4.0833e-12	0.205908	0.027297	TRUE
cg03387723	chr1	41242793	41242792	rs71692898:41706232:T:TA	41240560	41240560	0	1.80004e-08	-0.199085	0.0334485	FALSE
cg04341486	chr1	41282587	41282586	rs35883594:41744093:A:G	41278421	41278421	0	5.55925e-08	0.138976	0.0242912	FALSE
cg23319597	chr1	41329798	41329797	rs16828019:41745035:C:T	41279363	41279363	0	1.35564e-17	-0.435802	0.0448852	FALSE
cg19471466	chr1	41362459	41362458	rs71715635:41828124:A:AC	41362452	41362452	0	7.98961e-12	1.70474	0.229684	TRUE
cg15012766	chr1	41366698	41366697	rs4660192:41842350:C:T	41376678	41376678	0	1.10751e-11	0.598524	0.0812894	FALSE
cg03678139	chr1	41366717	41366716	rs4660192:41842350:C:T	41376678	41376678	0	1.13536e-11	0.329576	0.0447893	FALSE
cg11735311	chr1	41366978	41366977	rs4359027:41848296:G:A	41382624	41382624	0	2.06298e-07	0.0860906	0.0158086	FALSE
cg17016894	chr1	41423795	41423794	rs12133441	41423841	41423841	0	4.65899e-08	0.128554	0.0223271	FALSE
cg12437479	chr1	41432899	41432898	rs4451540:41905272:C:T	41439601	41439601	0	7.71558e-22	0.328412	0.0290332	FALSE
cg25193276	chr1	41435976	41435975	rs4451540:41905272:C:T	41439601	41439601	0	5.81707e-14	-0.236097	0.0284681	FALSE
cg05724479	chr1	41450462	41450461	rs2997336:41868738:G:A	41403066	41403066	0	6.97559e-07	-0.109817	0.0211918	FALSE
cg27238470	chr1	41484655	41484654	rs6674101:41950473:G:A	41484802	41484802	0	1.79762e-13	0.179362	0.0221521	FALSE
cg08460875	chr1	41484692	41484691	rs4660541:41954444:C:T	41488773	41488773	0	4.55124e-09	0.141569	0.022736	FALSE
cg15807154	chr1	41484722	41484721	rs6674101:41950473:G:A	41484802	41484802	0	3.08227e-12	0.155078	0.0204218	FALSE
cg04290779	chr1	41496397	41496396	rs747460:41962029:C:G	41496358	41496358	0	3.28212e-09	-0.603609	0.0959484	TRUE
cg07588874	chr1	41614085	41614084	rs4083497:42079867:A:G	41614196	41614196	0	3.74873e-09	-0.157783	0.0251854	FALSE
cg06885757	chr1	41623911	41623910	rs749200:42103769:A:G	41638098	41638098	0	5.72912e-07	0.146766	0.0280881	FALSE
cg17220055	chr1	41783328	41783327	rs1810202:42249204:C:T	41783533	41783533	0	5.40787e-09	-0.134695	0.021751	FALSE
cg24018522	chr1	41840716	41840715	rs12563071:42273653:C:T	41807982	41807982	0	1.29621e-07	0.123616	0.0222958	FALSE
cg04464434	chr1	41859912	41859911	rs6662131:42321335:A:G	41855664	41855664	0	4.43886e-11	0.275515	0.0387577	FALSE
cg09977515	chr1	41870977	41870976	rs783630:42346389:A:G	41880718	41880718	0	2.92899e-08	-0.214518	0.036651	TRUE
cg20075528	chr1	41870982	41870981	rs783633:42350172:C:A	41884501	41884501	0	8.94613e-11	-0.337546	0.0483678	TRUE
cg02031397	chr1	41917928	41917927	rs1408945:42364877:G:T	41899206	41899206	0	3.79546e-12	-0.227641	0.0301257	TRUE
cg14996491	chr1	41918614	41918613	rs2985846:42376915:A:G	41911244	41911244	0	9.6808e-07	-0.228765	0.0447714	FALSE
cg26038582	chr1	41918720	41918719	rs2985846:42376915:A:G	41911244	41911244	0	1.21414e-06	-0.304988	0.0602837	FALSE
cg05570491	chr1	41918767	41918766	rs11588703:42383814:C:G	41918143	41918143	0	9.31612e-10	-0.334897	0.0512422	FALSE
cg03884592	chr1	41918804	41918803	rs2985846:42376915:A:G	41911244	41911244	0	5.7537e-07	-0.234936	0.0449701	FALSE
cg08872577	chr1	41919810	41919809	rs76730011:42146686:T:A	41681015	41681015	0	7.67495e-08	0.350574	0.062002	TRUE
cg24049493	chr1	41920271	41920270	rs1998758:42386267:G:T	41920596	41920596	0	1.56256e-13	-0.247324	0.0304536	TRUE
cg16152117	chr1	41956028	41956027	rs647368:42274690:C:T	41809019	41809019	0	2.0851e-07	-0.131664	0.0241873	FALSE
cg01594290	chr1	42145716	42145715	rs883062:42609867:G:A	42144196	42144196	0	9.25802e-08	-0.183595	0.0326969	FALSE
cg24998527	chr1	42145937	42145936	rs1572041:42611553:G:A	42145882	42145882	0	2.23201e-17	-0.138981	0.0144375	FALSE
cg22816091	chr1	42146000	42145999	rs1572041:42611553:G:A	42145882	42145882	0	9.58399e-12	-0.115438	0.0156227	FALSE
cg06092502	chr1	42146017	42146016	1:42632881:A:G	42167210	42167210	0	3.22313e-11	0.221394	0.030888	FALSE
cg10197057	chr1	42146848	42146847	rs1572041:42611553:G:A	42145882	42145882	0	1.65753e-07	-0.130069	0.0236818	FALSE
cg19728577	chr1	42153493	42153492	rs35629903:42669666:C:CA	42203995	42203995	0	6.58933e-07	-0.103944	0.0200102	TRUE
cg09212118	chr1	42164856	42164855	rs12727077:42630724:G:A	42165053	42165053	0	4.63947e-09	-0.143934	0.0231298	FALSE
cg04775750	chr1	42229081	42229080	rs12759864:42633264:A:C	42167593	42167593	0	1.8021e-07	0.127092	0.0232149	TRUE
cg01990334	chr1	42335664	42335663	rs10540099:42801476:GTCTT:G	42335805	42335809	0	4.07157e-16	0.165405	0.0180957	TRUE
cg12375158	chr1	42336058	42336057	rs11587973:42761260:C:T	42295589	42295589	0	1.31086e-07	-0.0886959	0.0160044	TRUE
cg04353771	chr1	42463282	42463281	rs11286901:43005589:TA:T	42539918	42539919	0	7.17327e-14	0.103423	0.0125256	TRUE
cg06363865	chr1	42464099	42464098	rs143251938:43107630:C:T	42641959	42641959	0	1.12236e-06	-0.183224	0.0360908	FALSE
cg04580768	chr1	42646867	42646866	rs35170842:43106351:G:GGTCA	42640680	42640680	0	1.36931e-06	0.116511	0.0231526	TRUE
cg11853822	chr1	42657546	42657545	rs12567607:43102045:C:A	42636374	42636374	0	1.04439e-08	-0.169906	0.0280302	FALSE
cg04118124	chr1	42765579	42765578	rs3738504:43232807:C:G	42767136	42767136	0	1.10681e-11	-0.261278	0.0354853	FALSE
cg08116724	chr1	42765961	42765960	rs3738504:43232807:C:G	42767136	42767136	0	2.85983e-22	-0.257445	0.0224394	FALSE
cg02148318	chr1	42767177	42767176	rs55633857:43245924:CCAA:C	42780253	42780256	0	4.54897e-14	0.123675	0.0148363	TRUE
cg19552482	chr1	42846816	42846815	rs12136064:43312506:G:C	42846835	42846835	0	6.80631e-21	0.291461	0.0265998	FALSE
cg01934756	chr1	42887073	42887072	rs34864687:43355698:C:CA	42890027	42890027	0	7.61024e-12	0.137014	0.0184384	FALSE
cg15089806	chr1	42952529	42952528	rs841573:43436369:C:T	42970698	42970698	0	1.64689e-10	-0.151564	0.0220789	FALSE
cg20282814	chr1	42957402	42957401	rs2367159:43432589:T:C	42966918	42966918	0	1.00608e-07	0.218851	0.0390971	FALSE
cg03128534	chr1	42958306	42958305	rs3738515:43426621:G:C	42960950	42960950	0	2.12663e-21	0.165558	0.0148527	FALSE
cg07803811	chr1	42958311	42958310	rs3738515:43426621:G:C	42960950	42960950	0	2.52169e-16	0.179919	0.0195115	FALSE
cg26681016	chr1	42959254	42959253	rs76657494:43412051:G:A	42946380	42946380	0	3.18573e-09	0.748699	0.118901	TRUE
cg21615440	chr1	42959267	42959266	1:43414738:CAA:C	42949067	42949069	0	8.78239e-12	-0.409001	0.0552333	TRUE
cg14945834	chr1	42959298	42959297	rs12750584:43430883:G:A	42965212	42965212	0	1.1132e-38	-0.703726	0.0396525	FALSE
cg06792911	chr1	42959352	42959351	rs17387775	42950462	42950462	0	9.19843e-31	-0.593106	0.0404523	FALSE
cg12656391	chr1	42959486	42959485	rs17387775	42950462	42950462	0	2.77575e-40	-0.963446	0.0523772	FALSE
cg09003612	chr1	42959552	42959551	rs17387775	42950462	42950462	0	1.86282e-51	-1.16051	0.0500494	FALSE
cg00102166	chr1	42959667	42959666	rs12750584:43430883:G:A	42965212	42965212	0	3.29338e-33	-0.868683	0.0556908	FALSE
cg09824328	chr1	42959742	42959741	rs71654267:43433066:G:A	42967395	42967395	0	1.7092e-24	-1.16591	0.09476	FALSE
cg12101479	chr1	42960423	42960422	rs58062906:43438399:C:T	42972728	42972728	0	4.52469e-15	-0.351663	0.0402705	FALSE
cg13433694	chr1	43171569	43171568	rs606684:43592276:T:C	43126605	43126605	0	6.4237e-12	-0.268636	0.0360027	FALSE
cg13379971	chr1	43172805	43172804	rs606684:43592276:T:C	43126605	43126605	0	1.06164e-15	0.183568	0.0204446	FALSE
cg04228516	chr1	43225388	43225387	rs613956:43682461:G:A	43216790	43216790	0	2.31072e-12	-0.347174	0.0454099	TRUE
cg24464789	chr1	43285827	43285826	rs7523468:44493795:A:G	44028123	44028123	0	1.15003e-06	0.107829	0.0212624	TRUE
cg19406481	chr1	43294513	43294512	rs7549876:43760236:G:T	43294565	43294565	0	9.57039e-13	-0.234978	0.0301163	FALSE
cg24509649	chr1	43419145	43419144	rs12407785:43907092:G:A	43441421	43441421	0	2.69601e-17	-0.353019	0.0367921	TRUE
cg18394614	chr1	43592587	43592586	rs10652057:44062834:C:CTG	43597163	43597163	0	3.28364e-13	-0.259369	0.0324567	FALSE
cg00946598	chr1	43651423	43651422	rs597041:44118510:T:C	43652839	43652839	0	1.88053e-08	0.147784	0.0248664	FALSE
cg08462360	chr1	43653439	43653438	rs56960214:45078120:C:T	44612448	44612448	0	4.08717e-07	-0.217102	0.0409722	TRUE
cg12619880	chr1	43707128	43707127	rs77398040:43861086:T:G	43395415	43395415	0	6.84956e-26	1.91583	0.149369	TRUE
cg03511605	chr1	43715839	43715838	rs11429972:44096568:A:ATT	43630897	43630897	0	7.93155e-09	-0.165407	0.0270427	TRUE
cg23930257	chr1	43735521	43735520	rs77398040:43861086:T:G	43395415	43395415	0	3.83966e-11	-0.812713	0.113899	TRUE
cg25041176	chr1	43735546	43735545	rs77398040:43861086:T:G	43395415	43395415	0	3.33923e-11	-1.18899	0.166035	FALSE
cg18880737	chr1	43753438	43753437	rs77398040:43861086:T:G	43395415	43395415	0	7.3723e-10	-0.891547	0.135483	FALSE
cg05180596	chr1	43760873	43760872	rs77398040:43861086:T:G	43395415	43395415	0	1.4258e-10	-1.04435	0.151537	TRUE
cg02842833	chr1	43769727	43769726	rs374764715:44805040:GA:G	44339368	44339369	0	5.15775e-07	-1.5176	0.289167	TRUE
cg08959526	chr1	43770324	43770323	rs77398040:43861086:T:G	43395415	43395415	0	5.10672e-19	-1.57756	0.153897	FALSE
cg23848055	chr1	43774951	43774950	rs77398040:43861086:T:G	43395415	43395415	0	3.28561e-16	-1.73525	0.189094	FALSE
cg13666471	chr1	43783816	43783815	rs917294:44249485:A:G	43783814	43783814	0	1.53366e-19	0.535628	0.0512651	FALSE
cg11958827	chr1	43786456	43786455	rs114361356:44161275:G:A	43695604	43695604	0	4.02578e-13	-0.782528	0.0983647	TRUE
cg16047291	chr1	43786913	43786912	rs114361356:44161275:G:A	43695604	43695604	0	3.95993e-10	-0.897852	0.134027	TRUE
cg23028072	chr1	43791533	43791532	rs142156869:44122521:C:T	43656850	43656850	0	2.56376e-15	-1.47875	0.167483	FALSE
cg06322035	chr1	43800980	43800979	rs37460:44288364:C:G	43822692	43822692	0	7.21549e-08	0.158966	0.0280508	TRUE
cg11837102	chr1	43804515	43804514	rs37465:44283272:T:C	43817600	43817600	0	4.99464e-07	0.122306	0.0232734	TRUE
cg13964099	chr1	43924705	43924704	rs4660262:44382524:G:A	43916852	43916852	0	3.06479e-23	0.348518	0.0294469	FALSE
cg18446895	chr1	43933215	43933214	rs34224911:44258341:A:T	43792670	43792670	0	6.38176e-07	0.148841	0.0286147	FALSE
cg06207804	chr1	43933327	43933326	rs246776	43809028	43809028	0	2.34334e-07	0.100518	0.0185507	FALSE
cg20452714	chr1	43933398	43933397	rs12120287:44275686:A:G	43810015	43810015	0	2.42171e-07	-0.209058	0.0386319	TRUE
cg15962314	chr1	43934198	43934197	rs3791112:44379248:T:G	43913576	43913576	0	2.04684e-07	0.11738	0.0215476	FALSE
cg23954153	chr1	43936682	43936681	rs12127737:44402565:G:A	43936893	43936893	0	1.3937e-08	-0.185461	0.0308916	FALSE
cg12908607	chr1	43936851	43936850	rs12127737:44402565:G:A	43936893	43936893	0	3.73745e-16	-0.570563	0.0623227	FALSE
cg16583987	chr1	44043904	44043903	rs34522140:44520451:CT:C	44054779	44054780	0	3.4573e-07	0.172721	0.0323752	TRUE
cg03221998	chr1	44101432	44101431	rs11371574:44570562:T:TA	44104890	44104890	0	1.82972e-14	-0.426418	0.0502072	TRUE
cg09212210	chr1	44113584	44113583	rs601901:44582096:T:A	44116424	44116424	0	1.53071e-15	0.215044	0.0241167	FALSE
cg08533162	chr1	44239746	44239745	rs11210982:44793760:G:A	44328088	44328088	0	3.25118e-13	-0.508657	0.0636381	FALSE
cg22709362	chr1	44327909	44327908	rs34142138:44649621:CT:C	44183949	44183950	0	2.5425e-10	0.175045	0.0258066	TRUE
cg21534299	chr1	44355803	44355802	rs55938620:44830070:CT:C	44364398	44364399	0	1.19863e-06	0.100999	0.0199521	TRUE
cg07806732	chr1	44356126	44356125	rs12026967:44776240:C:A	44310568	44310568	0	1.32627e-26	0.655733	0.0500823	FALSE
cg27524602	chr1	44356141	44356140	rs12026967:44776240:C:A	44310568	44310568	0	8.97967e-33	1.14407	0.0741429	FALSE
cg02892772	chr1	44525371	44525370	rs270724	44525606	44525606	0	2.09533e-09	0.156853	0.0245902	FALSE
cg19158567	chr1	44565527	44565526	rs72671903:45055761:C:T	44590089	44590089	0	1.08547e-08	-0.146844	0.0242565	TRUE
cg05053708	chr1	44603824	44603823	rs6704426	44601763	44601763	0	9.03355e-07	0.125943	0.0245744	FALSE
cg02939577	chr1	44632905	44632904	1:45122683:C:CA	44657011	44657011	0	1.10116e-07	-0.114308	0.0204902	TRUE
cg03044096	chr1	44675198	44675197	rs12022097:45161553:C:G	44695881	44695881	0	2.98532e-07	-0.0938093	0.0174801	TRUE
cg06884882	chr1	44722275	44722274	rs188710918:45342355:C:G	44876683	44876683	0	4.99225e-07	-0.109587	0.0208527	TRUE
cg21991229	chr1	44775460	44775459	rs6693615:45180125:T:C	44714453	44714453	0	5.27559e-08	0.101243	0.0176626	TRUE
cg19247548	chr1	44813033	44813032	rs16832227:45222916:A:G	44757244	44757244	0	2.68447e-09	0.123065	0.0194405	FALSE
cg24643057	chr1	44815514	44815513	rs201524888:45401613:GT:G	44935941	44935942	0	3.8205e-12	0.211136	0.0279459	TRUE
cg17140737	chr1	44821299	44821298	rs11211035:45265240:G:A	44799568	44799568	0	1.70914e-08	-0.143184	0.0240143	TRUE
cg02581053	chr1	44949452	44949451	rs392410:45356638:C:T	44890966	44890966	0	5.0644e-21	-0.648299	0.0589074	FALSE
cg17278038	chr1	44986899	44986898	1:45437934:C:T	44972262	44972262	0	1.77344e-06	0.202619	0.0407346	TRUE
cg11530175	chr1	45001074	45001073	rs34279166:45464931:TA:T	44999259	44999260	0	8.57125e-07	-0.11325	0.0220477	TRUE
cg00940659	chr1	45007027	45007026	rs998418:45486272:T:C	45020600	45020600	0	4.39203e-12	-0.179274	0.0238075	FALSE
cg15801815	chr1	45010785	45010784	rs34579942:45492683:C:CA	45027011	45027011	0	3.68756e-22	0.195109	0.0170675	TRUE
cg22920538	chr1	45010792	45010791	rs12760109:45508306:G:A	45042634	45042634	0	4.94256e-09	0.116609	0.0187766	FALSE
cg18845703	chr1	45012026	45012025	rs10465876:45494750:T:C	45029078	45029078	0	5.17706e-25	0.270706	0.0216606	FALSE
cg25481479	chr1	45012902	45012901	rs56877547:44563279:T:TA	44097607	44097607	0	1.65364e-07	0.196569	0.0357864	TRUE
cg10320312	chr1	45365240	45365239	rs34768551:46020408:G:A	45554736	45554736	0	1.72946e-06	-0.196201	0.0393993	FALSE
cg24296786	chr1	45491343	45491342	1:46007032:CAA:C	45541360	45541362	0	1.72273e-18	0.186788	0.0185848	TRUE
cg11803389	chr1	45499349	45499348	rs56338311:45993198:C:CAA	45527526	45527526	0	2.12745e-13	0.212993	0.0264018	FALSE
cg03123370	chr1	45499672	45499671	rs2991966:45999503:G:A	45533831	45533831	0	3.27232e-17	-0.33498	0.0350298	FALSE
cg09791107	chr1	45557598	45557597	rs3790585:46023356:A:T	45557684	45557684	0	2.94384e-10	-0.203352	0.0301028	FALSE
cg22837372	chr1	45566825	45566824	rs145427440:45862703:C:T	45397031	45397031	0	3.24668e-09	0.258606	0.0410936	FALSE
cg06784218	chr1	45624133	45624132	rs12022673:46119373:T:C	45653701	45653701	0	4.62309e-10	0.152223	0.0228233	FALSE
cg18889144	chr1	45679396	45679395	rs201139656:46004687:AAAAAG:A	45539015	45539020	0	8.85284e-07	-0.0977446	0.0190556	FALSE
cg26899948	chr1	45687525	45687524	rs3013594:46138000:T:C	45672328	45672328	0	3.36209e-29	0.371995	0.0264399	TRUE
cg14122995	chr1	45723209	45723208	rs1707302:46600917:A:G	46135245	46135245	0	2.50185e-07	0.191523	0.0354371	FALSE
cg04038943	chr1	45730626	45730625	rs12022673:46119373:T:C	45653701	45653701	0	8.99523e-07	0.143868	0.0280668	TRUE
cg03146154	chr1	45751066	45751065	rs200134370:46193146:T:TTCCC	45727474	45727474	0	4.44958e-24	0.190538	0.015684	FALSE
cg04964007	chr1	45767440	45767439	rs111971542:46235998:A:T	45770326	45770326	0	9.20746e-08	0.21108	0.0375842	TRUE
cg17517453	chr1	45803308	45803307	rs35565437:46578969:AT:A	46113297	46113298	0	1.68719e-07	-0.0973552	0.0177378	TRUE
cg05450708	chr1	45923553	45923552	rs35378730:46539458:AT:A	46073786	46073787	0	1.3546e-17	-0.271987	0.0280128	TRUE
cg12978857	chr1	46045723	46045722	rs1416706:46602844:G:A	46137172	46137172	0	4.82014e-13	0.245798	0.0310209	FALSE
cg20650505	chr1	46063033	46063032	rs9429095:46603348:T:G	46137676	46137676	0	1.03551e-10	0.160084	0.0230287	FALSE
cg26011752	chr1	46084938	46084937	rs1707302:46600917:A:G	46135245	46135245	0	3.94802e-21	0.294758	0.0266846	FALSE
cg04181682	chr1	46108359	46108358	rs1707302:46600917:A:G	46135245	46135245	0	5.66131e-35	0.69138	0.0424617	FALSE
cg27584146	chr1	46134244	46134243	rs1416706:46602844:G:A	46137172	46137172	0	4.58499e-23	0.54857	0.046607	FALSE
cg20630926	chr1	46135694	46135693	rs9429095:46603348:T:G	46137676	46137676	0	1.08087e-12	0.280546	0.0360565	FALSE
cg06974930	chr1	46167482	46167481	rs9429095:46603348:T:G	46137676	46137676	0	2.23976e-15	0.260909	0.0294738	FALSE
cg05978555	chr1	46175081	46175080	rs35018988:46640602:C:CA	46174930	46174930	0	1.57606e-06	0.0752932	0.0150564	TRUE
cg04975920	chr1	46180553	46180552	rs35803383:46232758:CAA:C	45767086	45767088	0	1.28666e-06	0.0972892	0.0192795	TRUE
cg04036898	chr1	46198927	46198926	rs7552589:46657451:C:A	46191779	46191779	0	2.59451e-09	0.108444	0.0171128	FALSE
cg06212760	chr1	46199266	46199265	rs7521617:46664754:C:T	46199082	46199082	0	2.37792e-13	0.210586	0.0261667	FALSE
cg27651885	chr1	46202842	46202841	rs28363229:46732948:C:G	46267276	46267276	0	6.89784e-13	0.388824	0.0494666	FALSE
cg17344694	chr1	46203110	46203109	rs28363229:46732948:C:G	46267276	46267276	0	2.73057e-23	0.807311	0.0681032	FALSE
cg23431851	chr1	46203151	46203150	rs28363229:46732948:C:G	46267276	46267276	0	7.27896e-26	0.946138	0.0738234	FALSE
cg07862031	chr1	46203157	46203156	rs28363229:46732948:C:G	46267276	46267276	0	4.53256e-25	1.01688	0.0812256	FALSE
cg08160980	chr1	46203169	46203168	rs28363229:46732948:C:G	46267276	46267276	0	3.99276e-28	1.34926	0.0987437	FALSE
cg06787764	chr1	46203199	46203198	rs28363229:46732948:C:G	46267276	46267276	0	9.84581e-18	1.18301	0.121182	FALSE
cg01431908	chr1	46203211	46203210	rs28363229:46732948:C:G	46267276	46267276	0	1.63187e-18	0.675286	0.0671292	FALSE
cg15696662	chr1	46203550	46203549	rs28363229:46732948:C:G	46267276	46267276	0	5.91814e-14	0.243674	0.0293924	FALSE
cg18736474	chr1	46304841	46304840	rs11590411:46804254:T:G	46338582	46338582	0	3.75629e-07	-0.200787	0.0377627	TRUE
cg19323862	chr1	46339907	46339906	rs11589531:46803604:A:C	46337932	46337932	0	2.24341e-08	-0.173098	0.0293023	TRUE
cg13488501	chr1	46339913	46339912	rs11589531:46803604:A:C	46337932	46337932	0	2.54312e-11	-0.211254	0.0292955	FALSE
cg15580309	chr1	46348435	46348434	rs147712895:46817950:G:C	46352278	46352278	0	2.27133e-14	0.256089	0.0302851	FALSE
cg26667735	chr1	46397438	46397437	rs36170685:47459402:T:C	46993730	46993730	0	1.24259e-06	-0.247804	0.049031	TRUE
cg11134437	chr1	46407042	46407041	rs324418:46872698:A:G	46407026	46407026	0	1.10306e-07	-0.202554	0.0363109	FALSE
cg00403919	chr1	46407047	46407046	rs324418:46872698:A:G	46407026	46407026	0	4.79698e-10	-0.225246	0.0338075	FALSE
cg16990082	chr1	46423821	46423820	rs6678149:46854994:A:G	46389322	46389322	0	4.14534e-08	0.142107	0.0245784	FALSE
cg07370093	chr1	46432674	46432673	rs6687917:46898338:A:G	46432666	46432666	0	1.32462e-08	-0.216611	0.0360187	TRUE
cg03569909	chr1	46442709	46442708	rs868650:46925234:C:T	46459562	46459562	0	1.07564e-22	0.31935	0.0274551	FALSE
cg03812309	chr1	46472610	46472609	rs11211288:46940089:C:T	46474417	46474417	0	6.53688e-08	-0.217188	0.0381859	FALSE
cg16387850	chr1	46517218	46517217	rs12138736:46999758:T:C	46534086	46534086	0	1.45278e-16	-0.323943	0.0347814	FALSE
cg08643108	chr1	46543775	46543774	rs35998093:47007262:CT:C	46541590	46541591	0	1.89898e-13	0.151858	0.0187774	TRUE
cg06995548	chr1	46543856	46543855	rs1317949:47005429:C:T	46539757	46539757	0	7.88381e-07	0.0916553	0.0177796	FALSE
cg06660332	chr1	46544036	46544035	rs4442318:47012448:T:C	46546776	46546776	0	3.2095e-08	-0.255931	0.0438665	TRUE
cg13353942	chr1	46544552	46544551	rs4442318:47012448:T:C	46546776	46546776	0	3.6805e-09	-0.153148	0.0244315	FALSE
cg00228018	chr1	46617028	46617027	exm56927	46615069	46615069	0	8.81401e-12	-0.15535	0.0209811	FALSE
cg05965334	chr1	46617096	46617095	rs10890405:47040084:G:C	46574412	46574412	0	3.16693e-16	-0.215054	0.0234191	FALSE
cg07347511	chr1	46617160	46617159	rs7552833:47083025:A:C	46617353	46617353	0	2.0956e-17	-0.185141	0.0192117	FALSE
cg00950809	chr1	46617180	46617179	rs12048342:47078202:G:A	46612530	46612530	0	1.01719e-15	-0.164972	0.0183588	FALSE
cg05376185	chr1	46617198	46617197	rs7552833:47083025:A:C	46617353	46617353	0	2.48446e-10	-0.174544	0.0257163	FALSE
cg09338601	chr1	46643298	46643297	rs60675294:47169845:C:G	46704173	46704173	0	1.99557e-10	0.119133	0.0174462	FALSE
cg23254733	chr1	46668624	46668623	rs1971519:47207997:T:C	46742325	46742325	0	1.15047e-06	0.07344	0.0144817	TRUE
cg04879861	chr1	46668640	46668639	rs11403101:47099090:G:GA	46633418	46633418	0	1.76622e-07	-0.0949962	0.0173387	TRUE
cg07325614	chr1	46670542	46670541	rs2218190:47130594:C:T	46664922	46664922	0	3.00063e-07	0.11134	0.0207509	TRUE
cg15501359	chr1	46719380	46719379	rs4097354:47187073:T:G	46721401	46721401	0	2.56784e-12	0.263671	0.0345732	FALSE
cg13975894	chr1	47023056	47023055	rs9326152:47488569:T:C	47022897	47022897	0	3.84147e-15	0.277291	0.0316527	FALSE
cg06496648	chr1	47023290	47023289	rs1021828:47487568:T:C	47021896	47021896	0	1.0708e-14	0.25206	0.0293598	FALSE
cg02291556	chr1	47190469	47190468	rs2251786:47656998:T:A	47191326	47191326	0	4.77579e-07	-0.108381	0.0205855	FALSE
cg23649500	chr1	47224098	47224097	rs7664:47682017:T:G	47216345	47216345	0	3.74565e-09	-0.105172	0.0167871	FALSE
cg23803206	chr1	47333176	47333175	rs12729251:47756918:A:G	47291246	47291246	0	1.59149e-10	-0.16543	0.0240762	FALSE
cg26324491	chr1	47333416	47333415	rs12729251:47756918:A:G	47291246	47291246	0	7.48696e-07	-0.11639	0.0225279	FALSE
cg18983672	chr1	47415585	47415584	rs74074335:47596884:A:C	47131212	47131212	0	3.20068e-07	-0.194222	0.0362922	FALSE
cg27175287	chr1	47417563	47417562	rs7525184	47425689	47425689	0	7.30363e-07	0.0866717	0.0167581	FALSE
cg18595867	chr1	47433541	47433540	rs6665067:47914863:C:T	47449191	47449191	0	1.36363e-08	-0.140933	0.0234575	TRUE
cg13851904	chr1	47433559	47433558	rs11313296:47861661:CT:C	47395989	47395990	0	1.39229e-07	0.146505	0.0264964	TRUE
cg24931632	chr1	47433996	47433995	rs4926871:47919008:A:G	47453336	47453336	0	3.7775e-10	0.303249	0.045207	FALSE
cg09277376	chr1	47434005	47434004	rs60919562:47919703:C:CA	47454031	47454031	0	1.41407e-08	0.276628	0.0460993	TRUE
cg25880954	chr1	47434959	47434958	rs1316443:47907662:A:C	47441990	47441990	0	1.06942e-18	-0.70416	0.0695183	FALSE
cg06531379	chr1	47445778	47445777	rs571281:47914571:T:C	47448899	47448899	0	1.41337e-07	-0.195939	0.0354572	TRUE
cg21535606	chr1	47446269	47446268	rs571281:47914571:T:C	47448899	47448899	0	7.02709e-07	-0.168828	0.0325896	TRUE
cg02267408	chr1	47449198	47449197	rs571281:47914571:T:C	47448899	47448899	0	1.02533e-10	-0.223457	0.0321367	FALSE
cg17428085	chr1	47449337	47449336	rs12118186:47947056:G:T	47481384	47481384	0	1.37145e-06	-0.224494	0.0446137	TRUE
cg18017482	chr1	47449928	47449927	rs571281:47914571:T:C	47448899	47448899	0	6.31656e-07	-0.115125	0.0221231	TRUE
cg16761673	chr1	47504048	47504047	rs6588403:47964982:C:T	47499310	47499310	0	1.1748e-06	0.141857	0.0279987	FALSE
cg05514783	chr1	47725765	47725764	rs4926601	47727533	47727533	0	3.04623e-22	0.333902	0.0291295	FALSE
cg22345063	chr1	47726031	47726030	rs4926601	47727533	47727533	0	5.23594e-28	0.298571	0.0219215	FALSE
cg05901141	chr1	47918774	47918773	rs7532660:48359095:A:T	47893423	47893423	0	6.61647e-11	0.139207	0.0197883	FALSE
cg03438665	chr1	48205880	48205879	rs11205453:48671518:G:C	48205846	48205846	0	3.251e-08	-0.119364	0.0204682	TRUE
cg19377703	chr1	48207980	48207979	rs214214:48628867:T:A	48163195	48163195	0	2.33631e-13	0.240676	0.0298941	FALSE
cg00866264	chr1	48221212	48221211	rs17299309:48672919:C:G	48207247	48207247	0	5.64508e-07	-0.150858	0.0288533	FALSE
cg00247530	chr1	48228955	48228954	rs212961:48721749:T:C	48256077	48256077	0	6.49775e-07	-0.11657	0.0224276	FALSE
[truncated: 35,454 more rows]
