# Supplementary material for: QTL mapping of human retina DNA methylation identifies 87 gene-epigenome interactions in age-related macular degeneration
Source: Research Square preprint supplement (doi:10.21203/rs.3.rs-3011096/v1), 2023-06-16
Supplement: Supplementary file 37 [file Supplementary_Table20.xlsx]

## Sheet: Sheet1
GWAS Trait	GWAS variant	GWAS variant aligned (to 1kGenomes)	Effect allele	Other Allele	rsID_GWAS	GWAS_effect	ABS(GWAS_effect)	GWAS_p_value	LD interval start (b38)	LD interval end (b38)	LD interval size (kb)	Number variants tested in defined LD interval (r2 0.1 ¬± 50kb)	QTL Type	qtl_Variant_id	rsID_qtl	gene_id	Gene symbol	CPG	Tissue	QTL_pval_nominal	QTL_gwas_p_value	QTL_slope_relative_ALT	QTL_se	SEBETA_GC	GWAS_effect_relative_ALT	Qtl_gwas_relative_effect	eCAVIAR_prob in causal set	CLPP	id	QTL_variant_signif_emQTL_FDR05	QC_name_QTL_FDR05_P1E04_GWAS_P1E05
AMD EUR	chr1:196644043:T:C	chr1:196644043:T:C	C	T	rs148553336	-1.23787	1.23787	8.6e-26	195596401	197620474	2024.07	2534	mQTL	chr1:196898103:T:C	rs6685931	ENSG00000000971	CFH	cg04827773	Retina	5.99153e-18	0	0.295147	0.0299806	0.017204	0.78942	SAME	0.943235	1	chr1:196898103	FALSE	TRUE
AMD EUR	chr1:196747245:C:T	chr1:196747242:T:A	T	C	rs121913059	3.00964	3.00964	8.9e-24	196497245	196997245	500	960	mQTL	chr1:196898103:T:C	rs6685931	ENSG00000000971	CFH	cg04827773	Retina	5.99153e-18	0	0.295147	0.0299806	0.017204	0.78942	SAME	0.660887	1	chr1:196898103	FALSE	TRUE
AMD EUR	chr1:196411028:C:T	chr1:196411028:C:T	T	C	rs187328863	0.81978	0.81978	1.1e-68	195673199	197435434	1762.23	2381	mQTL	chr1:196898103:T:C	rs6685931	ENSG00000000971	CFH	cg04827773	Retina	5.99153e-18	0	0.295147	0.0299806	0.017204	0.78942	SAME	0.943235	1	chr1:196898103	FALSE	TRUE
AMD EUR	chr1:196687934:G:T	chr1:196687934:T:G	T	G	rs570618	0.8671	0.8671	0	196167205	197390966	1223.76	1957	mQTL	chr1:196898103:T:C	rs6685931	ENSG00000000971	CFH	cg04827773	Retina	5.99153e-18	0	0.295147	0.0299806	0.017204	0.78942	SAME	0.943235	1	chr1:196898103	FALSE	TRUE
AMD EUR	chr1:196846320:G:T	chr1:196846320:T:G	T	G	rs61818925	-0.510826	0.510826	6e-165	196329649	197390966	1061.32	1723	mQTL	chr1:196898103:T:C	rs6685931	ENSG00000000971	CFH	cg04827773	Retina	5.99153e-18	0	0.295147	0.0299806	0.017204	0.78942	SAME	0.943235	1	chr1:196898103	FALSE	TRUE
AMD EUR	chr1:196735502:C:A	chr1:196735502:C:A	A	C	rs10922109	-0.967584	0.967584	0	196329649	197240217	910.568	1559	mQTL	chr1:196898103:T:C	rs6685931	ENSG00000000971	CFH	cg04827773	Retina	5.99153e-18	0	0.295147	0.0299806	0.017204	0.78942	SAME	0.943235	1	chr1:196898103	FALSE	TRUE
AMD EUR	chr1:196737512:C:T	chr1:196737512:C:T	T	C	rs35292876	0.883768	0.883768	8.2e-37	195728092	197766425	2038.33	2566	mQTL	chr1:196898103:T:C	rs6685931	ENSG00000000971	CFH	cg04827773	Retina	5.99153e-18	0	0.295147	0.0299806	0.017204	0.78942	SAME	0.943235	1	chr1:196898103	FALSE	TRUE
AMD EUR	chr19:6718135:T:G	chr19:6718135:T:G	G	T	rs147859257	1.05082	1.05082	3.1e-28	5670846	7729841	2058.99	676	mQTL	chr19:6723113:A:T	rs235774	ENSG00000125733	TRIP10	cg07567260	Retina	1.69698e-08	3.24e-30	0.389476	0.0653056	0.017125	-0.19518	OPPOSITE	0.999926	0.98785	chr19:6723113	FALSE	TRUE
AMD EUR	chr19:6718135:T:G	chr19:6718135:T:G	G	T	rs147859257	1.05082	1.05082	3.1e-28	5670846	7729841	2058.99	676	mQTL	chr19:6723113:A:T	rs235774	ENSG00000125734	GPR108	cg07567260	Retina	1.69698e-08	3.24e-30	0.389476	0.0653056	0.017125	-0.19518	OPPOSITE	0.999926	0.98785	chr19:6723113	FALSE	TRUE
AMD EUR	chr19:6718135:T:G	chr19:6718135:T:G	G	T	rs147859257	1.05082	1.05082	3.1e-28	5670846	7729841	2058.99	676	mQTL	chr19:6723113:A:T	rs235774	ENSG00000283950	MIR6791	cg07567260	Retina	1.69698e-08	3.24e-30	0.389476	0.0653056	0.017125	-0.19518	OPPOSITE	0.999926	0.98785	chr19:6723113	FALSE	TRUE
AMD EUR	chr22:38080269:C:T	chr22:38080269:C:T	T	C	rs8135665	0.131028	0.131028	5.5e-11	37600688	38268926	668.238	453	mQTL	chr22:38081923:G:A	rs2235573	ENSG00000100156	SLC16A8	cg20832270	Retina	2.49228e-08	1.38e-08	0.134538	0.0228575	0.016403	0.093038	SAME	0.946231	0.979894	chr22:38081923	TRUE	TRUE
AMD EUR	chr22:38080269:C:T	chr22:38080269:C:T	T	C	rs8135665	0.131028	0.131028	5.5e-11	37600688	38268926	668.238	453	mQTL	chr22:38081923:G:A	rs2235573	ENSG00000128298	BAIAP2L2	cg20832270	Retina	2.49228e-08	1.38e-08	0.134538	0.0228575	0.016403	0.093038	SAME	0.946231	0.979894	chr22:38081923	TRUE	TRUE
AMD EUR	chr19:6718135:T:G	chr19:6718135:T:G	G	T	rs147859257	1.05082	1.05082	3.1e-28	5670846	7729841	2058.99	676	mQTL	chr19:6723113:A:T	rs235774	ENSG00000125733	TRIP10	cg12024887	Retina	4.57137e-08	3.24e-30	0.370644	0.0643295	0.017125	-0.19518	OPPOSITE	0.999947	0.979427	chr19:6723113	FALSE	TRUE
AMD EUR	chr19:6718135:T:G	chr19:6718135:T:G	G	T	rs147859257	1.05082	1.05082	3.1e-28	5670846	7729841	2058.99	676	mQTL	chr19:6723113:A:T	rs235774	ENSG00000125734	GPR108	cg12024887	Retina	4.57137e-08	3.24e-30	0.370644	0.0643295	0.017125	-0.19518	OPPOSITE	0.999947	0.979427	chr19:6723113	FALSE	TRUE
AMD EUR	chr19:6718135:T:G	chr19:6718135:T:G	G	T	rs147859257	1.05082	1.05082	3.1e-28	5670846	7729841	2058.99	676	mQTL	chr19:6723113:A:T	rs235774	ENSG00000283950	MIR6791	cg12024887	Retina	4.57137e-08	3.24e-30	0.370644	0.0643295	0.017125	-0.19518	OPPOSITE	0.999947	0.979427	chr19:6723113	FALSE	TRUE
AMD EUR	chr22:38080269:C:T	chr22:38080269:C:T	T	C	rs8135665	0.131028	0.131028	5.5e-11	37600688	38268926	668.238	453	mQTL	chr22:38081923:G:A	rs2235573	ENSG00000100156	SLC16A8	cg20439022	Retina	3.81442e-07	1.38e-08	0.110653	0.0208238	0.016403	0.093038	SAME	0.915615	0.978355	chr22:38081923	TRUE	TRUE
AMD EUR	chr22:38080269:C:T	chr22:38080269:C:T	T	C	rs8135665	0.131028	0.131028	5.5e-11	37600688	38268926	668.238	453	mQTL	chr22:38081923:G:A	rs2235573	ENSG00000100156	SLC16A8	cg20956278	Retina	3.18047e-08	1.38e-08	0.129296	0.0221543	0.016403	0.093038	SAME	0.93985	0.977112	chr22:38081923	TRUE	TRUE
AMD EUR	chr19:6718376:C:G	chr19:6718376:G:C	G	C	rs2230199	0.357674	0.357674	3.8e-69	6648126	6787633	139.507	454	eQTL	chr19:6723113:A:T	rs235774	ENSG00000125734	GPR108	NA	Retina	4.43648e-08	3.24e-30	-2.11647	0.379302	0.017125	-0.19518	SAME	1	0.939043	chr19:6723113	FALSE	TRUE
AMD EUR	chr19:6718135:T:G	chr19:6718135:T:G	G	T	rs147859257	1.05082	1.05082	3.1e-28	5670846	7729841	2058.99	677	eQTL	chr19:6723113:A:T	rs235774	ENSG00000125734	GPR108	NA	Retina	4.43648e-08	3.24e-30	-2.11647	0.379302	0.017125	-0.19518	SAME	1	0.914301	chr19:6723113	FALSE	TRUE
AMD EUR	chr19:6718376:C:G	chr19:6718376:G:C	G	C	rs2230199	0.357674	0.357674	3.8e-69	6648126	6787633	139.507	454	mQTL	chr19:6723113:A:T	rs235774	ENSG00000125733	TRIP10	cg12024887	Retina	4.57137e-08	3.24e-30	0.370644	0.0643295	0.017125	-0.19518	OPPOSITE	0.999973	0.897079	chr19:6723113	FALSE	TRUE
AMD EUR	chr19:6718376:C:G	chr19:6718376:G:C	G	C	rs2230199	0.357674	0.357674	3.8e-69	6648126	6787633	139.507	454	mQTL	chr19:6723113:A:T	rs235774	ENSG00000125734	GPR108	cg12024887	Retina	4.57137e-08	3.24e-30	0.370644	0.0643295	0.017125	-0.19518	OPPOSITE	0.999973	0.897079	chr19:6723113	FALSE	TRUE
AMD EUR	chr19:6718376:C:G	chr19:6718376:G:C	G	C	rs2230199	0.357674	0.357674	3.8e-69	6648126	6787633	139.507	454	mQTL	chr19:6723113:A:T	rs235774	ENSG00000283950	MIR6791	cg12024887	Retina	4.57137e-08	3.24e-30	0.370644	0.0643295	0.017125	-0.19518	OPPOSITE	0.999973	0.897079	chr19:6723113	FALSE	TRUE
AMD EUR	chr22:38080269:C:T	chr22:38080269:C:T	T	C	rs8135665	0.131028	0.131028	5.5e-11	37600688	38268926	668.238	453	eQTL	chr22:38081923:G:A	rs2235573	ENSG00000272720	CTA-228A9.3	NA	Retina	5.23563e-05	1.38e-08	0.194442	0.0475519	0.016403	0.093038	SAME	0.909811	0.820041	chr22:38081923	FALSE	TRUE
AMD EUR	chr19:6718376:C:G	chr19:6718376:G:C	G	C	rs2230199	0.357674	0.357674	3.8e-69	6648126	6787633	139.507	454	mQTL	chr19:6723113:A:T	rs235774	ENSG00000125733	TRIP10	cg07567260	Retina	1.69698e-08	3.24e-30	0.389476	0.0653056	0.017125	-0.19518	OPPOSITE	0.99996	0.650375	chr19:6723113	FALSE	TRUE
AMD EUR	chr19:6718376:C:G	chr19:6718376:G:C	G	C	rs2230199	0.357674	0.357674	3.8e-69	6648126	6787633	139.507	454	mQTL	chr19:6723113:A:T	rs235774	ENSG00000125734	GPR108	cg07567260	Retina	1.69698e-08	3.24e-30	0.389476	0.0653056	0.017125	-0.19518	OPPOSITE	0.99996	0.650375	chr19:6723113	FALSE	TRUE
AMD EUR	chr19:6718376:C:G	chr19:6718376:G:C	G	C	rs2230199	0.357674	0.357674	3.8e-69	6648126	6787633	139.507	454	mQTL	chr19:6723113:A:T	rs235774	ENSG00000283950	MIR6791	cg07567260	Retina	1.69698e-08	3.24e-30	0.389476	0.0653056	0.017125	-0.19518	OPPOSITE	0.99996	0.650375	chr19:6723113	FALSE	TRUE
AMD EUR	chr10:24710664:G:A	chr10:24710664:G:A	A	G	rs12357257	0.10436	0.10436	4.4e-08	24487469	24938127	450.658	323	mQTL	chr10:24710664:G:A	rs12357257	ENSG00000107863	ARHGAP21	cg22753919	Retina	1.31096e-07	4.39e-08	0.163582	0.029517	0.019645	0.1075	SAME	0.540988	0.649881	chr10:24710664	FALSE	TRUE
AMD EUR	chr10:24710664:G:A	chr10:24710664:G:A	A	G	rs12357257	0.10436	0.10436	4.4e-08	24487469	24938127	450.658	323	mQTL	chr10:24710664:G:A	rs12357257	ENSG00000199535	RNA5SP305	cg22753919	Retina	1.31096e-07	4.39e-08	0.163582	0.029517	0.019645	0.1075	SAME	0.540988	0.649881	chr10:24710664	FALSE	TRUE
AMD EUR	chr1:196747245:C:T	chr1:196747242:T:A	T	C	rs121913059	3.00964	3.00964	8.9e-24	196497245	196997245	500	960	mQTL	chr1:196910875:C:T	rs1409153	ENSG00000000971	CFH	cg04827773	Retina	1.18744e-17	0	-0.292114	0.0300182	0.01724	-0.79257	SAME	0.339113	0.513119	chr1:196910875	FALSE	TRUE
AMD EUR	chr22:38080269:C:T	chr22:38080269:C:T	T	C	rs8135665	0.131028	0.131028	5.5e-11	37600688	38268926	668.238	453	mQTL	chr22:38081923:G:A	rs2235573	ENSG00000100097	LGALS1	cg21737444	Retina	0.00193378	1.38e-08	0.125117	0.0396448	0.016403	0.093038	SAME	0.796097	0.282866	chr22:38081923	TRUE	TRUE
AMD EUR	chr20:45986352:TTTTC:T	chr20:45986338:A:T	T	TTTTC	rs142450006	-0.162519	0.162519	2.4e-10	45736352	46236352	500	194	eQTL	chr20:46005037:C:T	rs3848721	ENSG00000149634	SPATA25	NA	Retina	4.03986e-05	8.9e-07	-0.0999644	0.0240801	0.017199	-0.084459	SAME	0.518283	0.216995	chr20:46005037	FALSE	TRUE
AMD EUR	chr19:1031439:C:T	chr19:1031439:C:T	T	C	rs67538026	-0.105361	0.105361	2.6e-08	948322	1142512	194.19	929	eQTL	chr19:1031439:C:T	rs67538026	ENSG00000182087	TMEM259	NA	Retina	2.62276e-06	2.58e-08	-2.72325	0.571296	0.018543	-0.10318	SAME	0.350927	0.216796	chr19:1031439	FALSE	TRUE
AMD EUR	chr17:28322698:C:A	chr17:28322698:A:C	A	C	rs11080055	-0.0943107	0.0943107	1e-08	27998441	28520397	521.956	565	eQTL	chr17:28379927:G:T	rs2027993	ENSG00000244045	TMEM199	NA	Retina	4.3985e-07	3.31e-08	0.641029	0.124822	0.016569	0.091471	SAME	0.499044	0.195737	chr17:28379927	FALSE	TRUE
AMD EUR	chr7:105115879:C:T	chr7:105115879:C:T	T	C	rs1142	0.10436	0.10436	1.4e-09	104780475	105506002	725.527	586	mQTL	chr7:105012224:G:A	rs6950894	ENSG00000228393	LINC01004	cg11712338	Retina	4.58591e-20	9e-09	0.323546	0.0303919	0.016457	-0.094543	OPPOSITE	0.434552	0.168684	chr7:105012224	FALSE	TRUE
AMD EUR	chr17:28322698:C:A	chr17:28322698:A:C	A	C	rs11080055	-0.0943107	0.0943107	1e-08	27998441	28520397	521.956	565	eQTL	chr17:28306590:C:T	rs241777	ENSG00000244045	TMEM199	NA	Retina	4.25155e-07	1.25e-08	-0.651973	0.126785	0.016737	-0.095206	SAME	0.371532	0.145724	chr17:28306590	TRUE	TRUE
AMD EUR	chr7:105115879:C:T	chr7:105115879:C:T	T	C	rs1142	0.10436	0.10436	1.4e-09	104780475	105506002	725.527	586	mQTL	chr7:105008590:A:G	rs111595825	ENSG00000228393	LINC01004	cg11712338	Retina	4.82669e-20	8.74e-09	0.323443	0.030406	0.016459	-0.094639	OPPOSITE	0.372911	0.144757	chr7:105008590	FALSE	TRUE
AMD EUR	chr20:45986352:TTTTC:T	chr20:45986338:A:T	T	TTTTC	rs142450006	-0.162519	0.162519	2.4e-10	45736352	46236352	500	194	eQTL	chr20:46005181:A:G	rs3848722	ENSG00000149634	SPATA25	NA	Retina	4.00984e-05	1.04e-06	-0.100008	0.0240803	0.017195	-0.083923	SAME	0.311831	0.130557	chr20:46005181	FALSE	TRUE
AMD EUR	chr14:68520282:A:G	chr14:68520282:G:A	G	A	rs2842339	0.131028	0.131028	1.4e-06	68348153	68633168	285.015	747	mQTL	chr14:68381545:G:A	rs11627490	ENSG00000182185	RAD51B	cg04258899	Retina	7.94674e-13	1.05e-06	-0.205946	0.0262844	0.016413	0.080094	OPPOSITE	0.367133	0.121197	chr14:68381545	FALSE	TRUE
AMD EUR	chr10:24710664:G:A	chr10:24710664:G:A	A	G	rs12357257	0.10436	0.10436	4.4e-08	24487469	24938127	450.658	323	mQTL	chr10:24726689:A:T	rs4748969	ENSG00000107863	ARHGAP21	cg22753919	Retina	7.25608e-05	6.14e-07	-0.112698	0.0276136	0.01847	-0.092078	SAME	0.0964358	0.115847	chr10:24726689	FALSE	TRUE
AMD EUR	chr10:24710664:G:A	chr10:24710664:G:A	A	G	rs12357257	0.10436	0.10436	4.4e-08	24487469	24938127	450.658	323	mQTL	chr10:24726689:A:T	rs4748969	ENSG00000199535	RNA5SP305	cg22753919	Retina	7.25608e-05	6.14e-07	-0.112698	0.0276136	0.01847	-0.092078	SAME	0.0964358	0.115847	chr10:24726689	FALSE	TRUE
AMD EUR	chr19:1031439:C:T	chr19:1031439:C:T	T	C	rs67538026	-0.105361	0.105361	2.6e-08	948322	1142512	194.19	929	eQTL	chr19:1031551:C:T	rs113772652	ENSG00000182087	TMEM259	NA	Retina	2.71169e-06	4.83e-08	-2.71998	0.571463	0.018559	-0.10123	SAME	0.110262	0.068118	chr19:1031551	FALSE	TRUE
AMD EUR	chr1:196644043:T:C	chr1:196644043:T:C	C	T	rs148553336	-1.23787	1.23787	8.6e-26	195596401	197620474	2024.07	2534	mQTL	chr1:196910875:C:T	rs1409153	ENSG00000000971	CFH	cg04827773	Retina	1.18744e-17	0	-0.292114	0.0300182	0.01724	-0.79257	SAME	0.0567647	0.0601808	chr1:196910875	FALSE	TRUE
AMD EUR	chr1:196411028:C:T	chr1:196411028:C:T	T	C	rs187328863	0.81978	0.81978	1.1e-68	195673199	197435434	1762.23	2381	mQTL	chr1:196910875:C:T	rs1409153	ENSG00000000971	CFH	cg04827773	Retina	1.18744e-17	0	-0.292114	0.0300182	0.01724	-0.79257	SAME	0.0567647	0.0601808	chr1:196910875	FALSE	TRUE
AMD EUR	chr1:196687934:G:T	chr1:196687934:T:G	T	G	rs570618	0.8671	0.8671	0	196167205	197390966	1223.76	1957	mQTL	chr1:196910875:C:T	rs1409153	ENSG00000000971	CFH	cg04827773	Retina	1.18744e-17	0	-0.292114	0.0300182	0.01724	-0.79257	SAME	0.0567647	0.0601808	chr1:196910875	FALSE	TRUE
AMD EUR	chr1:196846320:G:T	chr1:196846320:T:G	T	G	rs61818925	-0.510826	0.510826	6e-165	196329649	197390966	1061.32	1723	mQTL	chr1:196910875:C:T	rs1409153	ENSG00000000971	CFH	cg04827773	Retina	1.18744e-17	0	-0.292114	0.0300182	0.01724	-0.79257	SAME	0.0567647	0.0601808	chr1:196910875	FALSE	TRUE
AMD EUR	chr1:196735502:C:A	chr1:196735502:C:A	A	C	rs10922109	-0.967584	0.967584	0	196329649	197240217	910.568	1559	mQTL	chr1:196910875:C:T	rs1409153	ENSG00000000971	CFH	cg04827773	Retina	1.18744e-17	0	-0.292114	0.0300182	0.01724	-0.79257	SAME	0.0567647	0.0601808	chr1:196910875	FALSE	TRUE
AMD EUR	chr1:196737512:C:T	chr1:196737512:C:T	T	C	rs35292876	0.883768	0.883768	8.2e-37	195728092	197766425	2038.33	2566	mQTL	chr1:196910875:C:T	rs1409153	ENSG00000000971	CFH	cg04827773	Retina	1.18744e-17	0	-0.292114	0.0300182	0.01724	-0.79257	SAME	0.0567647	0.0601808	chr1:196910875	FALSE	TRUE
AMD EUR	chr14:68520282:A:G	chr14:68520282:G:A	G	A	rs2842339	0.131028	0.131028	1.4e-06	68348153	68633168	285.015	747	mQTL	chr14:68370734:G:A	rs2331693	ENSG00000182185	RAD51B	cg13572771	Retina	1.36581e-07	1.73e-06	-0.0926175	0.0167382	0.016395	0.078373	OPPOSITE	0.238531	0.0520601	chr14:68370734	FALSE	TRUE
AMD EUR	chr14:68520282:A:G	chr14:68520282:G:A	G	A	rs2842339	0.131028	0.131028	1.4e-06	68348153	68633168	285.015	747	mQTL	chr14:68371165:A:C	rs2877461	ENSG00000182185	RAD51B	cg13572771	Retina	1.35272e-07	1.83e-06	-0.0926489	0.0167377	0.016395	0.078193	OPPOSITE	0.217062	0.0473745	chr14:68371165	FALSE	TRUE
AMD EUR	chr22:38080269:C:T	chr22:38080269:C:T	T	C	rs8135665	0.131028	0.131028	5.5e-11	37600688	38268926	668.238	453	mQTL	chr22:38104820:G:A	rs5995536	ENSG00000100156	SLC16A8	cg20439022	Retina	1.17732e-05	2.89e-08	-0.0975842	0.0215241	0.016457	-0.091249	SAME	0.042991	0.0459368	chr22:38104820	FALSE	TRUE
AMD EUR	chr22:38080269:C:T	chr22:38080269:C:T	T	C	rs8135665	0.131028	0.131028	5.5e-11	37600688	38268926	668.238	453	mQTL	chr22:38103579:A:C	rs6001002	ENSG00000100156	SLC16A8	cg20832270	Retina	3.36556e-08	8.35e-08	-0.133541	0.0229271	0.016411	-0.087907	SAME	0.0429229	0.0444499	chr22:38103579	FALSE	TRUE
AMD EUR	chr22:38080269:C:T	chr22:38080269:C:T	T	C	rs8135665	0.131028	0.131028	5.5e-11	37600688	38268926	668.238	453	mQTL	chr22:38103579:A:C	rs6001002	ENSG00000128298	BAIAP2L2	cg20832270	Retina	3.36556e-08	8.35e-08	-0.133541	0.0229271	0.016411	-0.087907	SAME	0.0429229	0.0444499	chr22:38103579	FALSE	TRUE
AMD EUR	chr14:68520282:A:G	chr14:68520282:G:A	G	A	rs2842339	0.131028	0.131028	1.4e-06	68348153	68633168	285.015	747	mQTL	chr14:68370734:G:A	rs2331693	ENSG00000182185	RAD51B	cg04258899	Retina	9.49642e-13	1.73e-06	-0.20546	0.0263285	0.016395	0.078373	OPPOSITE	0.123911	0.0409052	chr14:68370734	FALSE	TRUE
AMD EUR	chr14:68520282:A:G	chr14:68520282:G:A	G	A	rs2842339	0.131028	0.131028	1.4e-06	68348153	68633168	285.015	747	mQTL	chr14:68371165:A:C	rs2877461	ENSG00000182185	RAD51B	cg04258899	Retina	9.4034e-13	1.83e-06	-0.2055	0.0263277	0.016395	0.078193	OPPOSITE	0.113387	0.037431	chr14:68371165	FALSE	TRUE
AMD EUR	chr14:68520282:A:G	chr14:68520282:G:A	G	A	rs2842339	0.131028	0.131028	1.4e-06	68348153	68633168	285.015	747	mQTL	chr14:68380105:A:G	rs3784115	ENSG00000182185	RAD51B	cg04258899	Retina	7.67615e-13	1.07e-06	-0.206739	0.026365	0.016408	0.079995	OPPOSITE	0.108098	0.0356852	chr14:68380105	FALSE	TRUE
AMD EUR	chr20:45986352:TTTTC:T	chr20:45986338:A:T	T	TTTTC	rs142450006	-0.162519	0.162519	2.4e-10	45736352	46236352	500	194	eQTL	chr20:46005037:C:T	rs3848721	ENSG00000204044	RP11-465L10.10	NA	Retina	2.97553e-06	8.9e-07	-0.103342	0.0218029	0.017199	-0.084459	SAME	0.380386	0.0350716	chr20:46005037	FALSE	TRUE
AMD EUR	chr22:38080269:C:T	chr22:38080269:C:T	T	C	rs8135665	0.131028	0.131028	5.5e-11	37600688	38268926	668.238	453	mQTL	chr22:38103579:A:C	rs6001002	ENSG00000100156	SLC16A8	cg20956278	Retina	4.74055e-06	8.35e-08	-0.108776	0.0229063	0.016411	-0.087907	SAME	0.0335566	0.034887	chr22:38103579	FALSE	TRUE
AMD EUR	chr14:68520282:A:G	chr14:68520282:G:A	G	A	rs2842339	0.131028	0.131028	1.4e-06	68348153	68633168	285.015	747	mQTL	chr14:68369017:A:G	rs3784113	ENSG00000182185	RAD51B	cg13572771	Retina	1.4296e-07	1.98e-06	-0.092466	0.01674	0.016395	0.077927	OPPOSITE	0.156904	0.0342448	chr14:68369017	FALSE	TRUE
AMD EUR	chr22:38080269:C:T	chr22:38080269:C:T	T	C	rs8135665	0.131028	0.131028	5.5e-11	37600688	38268926	668.238	453	mQTL	chr22:38103579:A:C	rs6001002	ENSG00000100156	SLC16A8	cg20439022	Retina	9.23455e-06	8.35e-08	-0.0977036	0.0212778	0.016411	-0.087907	SAME	0.0276378	0.0295316	chr22:38103579	FALSE	TRUE
AMD EUR	chr7:105115879:C:T	chr7:105115879:C:T	T	C	rs1142	0.10436	0.10436	1.4e-09	104780475	105506002	725.527	586	mQTL	chr7:105006452:C:T	rs6466035	ENSG00000228393	LINC01004	cg11712338	Retina	4.81731e-20	8.89e-09	-0.323387	0.0303998	0.016467	0.094636	OPPOSITE	0.0702991	0.0272887	chr7:105006452	FALSE	TRUE
AMD EUR	chr19:45245104:G:C	chr19:45245104:G:C	C	G	rs73036519	-0.0943107	0.0943107	3.1e-07	45162939	45390057	227.118	664	mQTL	chr19:45263471:G:A	rs7255933	ENSG00000007047	MARK4	cg22763905	Retina	3.52648e-08	1.58e-06	0.159582	0.0274431	0.019178	-0.091985	OPPOSITE	0.502669	0.0265973	chr19:45263471	FALSE	TRUE
AMD EUR	chr14:68520282:A:G	chr14:68520282:G:A	G	A	rs2842339	0.131028	0.131028	1.4e-06	68348153	68633168	285.015	747	mQTL	chr14:68369017:A:G	rs3784113	ENSG00000182185	RAD51B	cg04258899	Retina	9.93158e-13	1.98e-06	-0.205273	0.0263313	0.016395	0.077927	OPPOSITE	0.0799168	0.026382	chr14:68369017	FALSE	TRUE
AMD EUR	chr22:38080269:C:T	chr22:38080269:C:T	T	C	rs8135665	0.131028	0.131028	5.5e-11	37600688	38268926	668.238	453	mQTL	chr22:38081923:G:A	rs2235573	ENSG00000100116	GCAT	cg16048805	Retina	0.0232707	1.38e-08	0.0442193	0.0192892	0.016403	0.093038	SAME	0.930201	0.0256077	chr22:38081923	TRUE	TRUE
AMD EUR	chr14:68520282:A:G	chr14:68520282:G:A	G	A	rs2842339	0.131028	0.131028	1.4e-06	68348153	68633168	285.015	747	mQTL	chr14:68380105:A:G	rs3784115	ENSG00000182185	RAD51B	cg13572771	Retina	1.29764e-07	1.07e-06	-0.093026	0.0167792	0.016408	0.079995	OPPOSITE	0.116285	0.0253795	chr14:68380105	FALSE	TRUE
AMD EUR	chr7:105115879:C:T	chr7:105115879:C:T	T	C	rs1142	0.10436	0.10436	1.4e-09	104780475	105506002	725.527	586	mQTL	chr7:105005731:A:G	rs12705296	ENSG00000228393	LINC01004	cg11712338	Retina	4.93527e-20	9.01e-09	-0.323367	0.0304093	0.016471	0.094626	OPPOSITE	0.0611315	0.02373	chr7:105005731	FALSE	TRUE
AMD EUR	chr14:68520282:A:G	chr14:68520282:G:A	G	A	rs2842339	0.131028	0.131028	1.4e-06	68348153	68633168	285.015	747	mQTL	chr14:68378078:C:G	rs1885014	ENSG00000182185	RAD51B	cg04258899	Retina	8.04161e-13	1.24e-06	-0.206419	0.0263519	0.016403	0.079508	OPPOSITE	0.0683163	0.0225525	chr14:68378078	FALSE	TRUE
AMD EUR	chr20:45986352:TTTTC:T	chr20:45986338:A:T	T	TTTTC	rs142450006	-0.162519	0.162519	2.4e-10	45736352	46236352	500	194	eQTL	chr20:46005181:A:G	rs3848722	ENSG00000204044	RP11-465L10.10	NA	Retina	2.95509e-06	1.04e-06	-0.103376	0.0218032	0.017195	-0.083923	SAME	0.228667	0.0210831	chr20:46005181	FALSE	TRUE
AMD EUR	chr14:68520282:A:G	chr14:68520282:G:A	G	A	rs2842339	0.131028	0.131028	1.4e-06	68348153	68633168	285.015	747	mQTL	chr14:68386158:G:A	rs3950069	ENSG00000182185	RAD51B	cg04258899	Retina	8.88516e-13	7.19e-07	-0.205773	0.0263288	0.016377	0.08112	OPPOSITE	0.0594734	0.0196332	chr14:68386158	FALSE	TRUE
AMD EUR	chr14:68520282:A:G	chr14:68520282:G:A	G	A	rs2842339	0.131028	0.131028	1.4e-06	68348153	68633168	285.015	747	mQTL	chr14:68378078:C:G	rs1885014	ENSG00000182185	RAD51B	cg13572771	Retina	1.28927e-07	1.24e-06	-0.0929704	0.0167651	0.016403	0.079508	OPPOSITE	0.0866189	0.0189049	chr14:68378078	FALSE	TRUE
AMD EUR	chr22:38080269:C:T	chr22:38080269:C:T	T	C	rs8135665	0.131028	0.131028	5.5e-11	37600688	38268926	668.238	453	mQTL	chr22:38081923:G:A	rs2235573	ENSG00000100201	DDX17	cg25016840	Retina	0.131499	1.38e-08	0.0165797	0.0109329	0.016403	0.093038	SAME	0.851941	0.0188532	chr22:38081923	TRUE	TRUE
AMD EUR	chr17:28322698:C:A	chr17:28322698:A:C	A	C	rs11080055	-0.0943107	0.0943107	1e-08	27998441	28520397	521.956	565	eQTL	chr17:28306590:C:T	rs241777	ENSG00000004139	SARM1	NA	Retina	0.00476407	1.25e-08	-1.92451	0.678021	0.016737	-0.095206	SAME	0.0983312	0.0152608	chr17:28306590	TRUE	TRUE
AMD EUR	chr14:68520282:A:G	chr14:68520282:G:A	G	A	rs2842339	0.131028	0.131028	1.4e-06	68348153	68633168	285.015	747	mQTL	chr14:68373384:A:G	rs55749276	ENSG00000182185	RAD51B	cg13572771	Retina	1.28376e-07	1.4e-06	-0.0928178	0.0167348	0.016399	0.079087	OPPOSITE	0.0669214	0.0146058	chr14:68373384	FALSE	TRUE
AMD EUR	chr22:38080269:C:T	chr22:38080269:C:T	T	C	rs8135665	0.131028	0.131028	5.5e-11	37600688	38268926	668.238	453	mQTL	chr22:38104820:G:A	rs5995536	ENSG00000100156	SLC16A8	cg20956278	Retina	8.7364e-06	2.89e-08	-0.106956	0.0232261	0.016457	-0.091249	SAME	0.0133667	0.0138966	chr22:38104820	FALSE	TRUE
AMD EUR	chr20:45986352:TTTTC:T	chr20:45986338:A:T	T	TTTTC	rs142450006	-0.162519	0.162519	2.4e-10	45736352	46236352	500	194	mQTL	chr20:46006464:C:T	rs6065913	ENSG00000124140	SLC12A5	cg07191594	Retina	2.83709e-18	4.07e-07	-0.26565	0.0266496	0.017288	-0.087508	SAME	0.434614	0.0138923	chr20:46006464	FALSE	TRUE
AMD EUR	chr17:28322698:C:A	chr17:28322698:A:C	A	C	rs11080055	-0.0943107	0.0943107	1e-08	27998441	28520397	521.956	565	eQTL	chr17:28389802:C:T	rs4795433	ENSG00000244045	TMEM199	NA	Retina	5.82235e-07	1.14e-08	0.630853	0.124206	0.016329	0.093154	SAME	0.0350237	0.0137371	chr17:28389802	FALSE	TRUE
AMD EUR	chr7:105115879:C:T	chr7:105115879:C:T	T	C	rs1142	0.10436	0.10436	1.4e-09	104780475	105506002	725.527	586	mQTL	chr7:104996493:T:C	rs6980244	ENSG00000228393	LINC01004	cg11712338	Retina	5.26083e-20	1.03e-08	-0.323098	0.0304139	0.016505	0.094451	OPPOSITE	0.0328031	0.0127335	chr7:104996493	FALSE	TRUE
AMD EUR	chr14:68520282:A:G	chr14:68520282:G:A	G	A	rs2842339	0.131028	0.131028	1.4e-06	68348153	68633168	285.015	747	mQTL	chr14:68373384:A:G	rs55749276	ENSG00000182185	RAD51B	cg04258899	Retina	8.8639e-13	1.4e-06	-0.20573	0.0263219	0.016399	0.079087	OPPOSITE	0.0383425	0.0126576	chr14:68373384	FALSE	TRUE
AMD EUR	chr14:68520282:A:G	chr14:68520282:G:A	G	A	rs2842339	0.131028	0.131028	1.4e-06	68348153	68633168	285.015	747	mQTL	chr14:68373350:G:A	rs61986910	ENSG00000182185	RAD51B	cg13572771	Retina	1.2845e-07	1.24e-06	-0.0928139	0.0167345	0.016447	0.079706	OPPOSITE	0.0498478	0.0108795	chr14:68373350	FALSE	TRUE
AMD EUR	chr5:39327786:G:T	chr5:39327786:G:T	T	G	rs62358361	0.587787	0.587787	1.3e-14	38362854	40352636	1989.78	266	mQTL	chr5:39400254:T:C	rs10043562	ENSG00000113600	C9	cg05393284	Retina	8.44371e-05	0.0041	-0.210122	0.0519854	0.019392	0.055628	OPPOSITE	1	0.999776	chr5:39400254	FALSE	FALSE
AMD EUR	chr15:58431740:G:A	chr15:58431740:G:A	A	G	rs2070895	-0.139262	0.139262	2.4e-11	58376031	58501510	125.479	461	mQTL	chr15:58386521:T:C	rs261290	ENSG00000128918	ALDH1A2	cg10704055	Retina	0.000107842	1.24e-11	0.175173	0.0440359	0.017593	0.11905	SAME	0.535541	0.998348	chr15:58386521	FALSE	FALSE
AMD EUR	chr12:55721994:C:A	chr12:55721994:C:A	A	C	rs3138141	0.14842	0.14842	4.3e-09	55641675	56007562	365.887	423	eQTL	chr12:55834720:C:G	rs750667	ENSG00000135441	BLOC1S1	NA	Retina	1.24026e-06	0.000819	1.4297	0.290341	0.018536	0.062	SAME	0.512867	0.998325	chr12:55834720	FALSE	FALSE
AMD EUR	chr15:58388755:T:C	chr15:58388755:T:C	C	T	rs2043085	-0.139262	0.139262	4.3e-15	58328698	58474416	145.718	641	mQTL	chr15:58386521:T:C	rs261290	ENSG00000128918	ALDH1A2	cg10704055	Retina	0.000107842	1.24e-11	0.175173	0.0440359	0.017593	0.11905	SAME	0.612668	0.985324	chr15:58386521	FALSE	FALSE
AMD EUR	chr12:55721994:C:A	chr12:55721994:C:A	A	C	rs3138141	0.14842	0.14842	4.3e-09	55641675	56007562	365.887	423	eQTL	chr12:55769452:C:G	rs2432579	ENSG00000135441	BLOC1S1	NA	Retina	5.1678e-06	0.00255	-1.30023	0.281406	0.01799	-0.054266	SAME	0.487023	0.948018	chr12:55769452	FALSE	FALSE
AMD EUR	chr15:58431740:G:A	chr15:58431740:G:A	A	G	rs2070895	-0.139262	0.139262	2.4e-11	58376031	58501510	125.479	461	mQTL	chr15:58387985:C:T	rs7177289	ENSG00000128918	ALDH1A2	cg10704055	Retina	0.000153914	2.65e-11	-0.167075	0.043021	0.017447	-0.11614	SAME	0.464417	0.865759	chr15:58387985	FALSE	FALSE
AMD EUR	chr22:38080269:C:T	chr22:38080269:C:T	T	C	rs8135665	0.131028	0.131028	5.5e-11	37600688	38268926	668.238	453	eQTL	chr22:38081923:G:A	rs2235573	ENSG00000100139	MICALL1	NA	Retina	0.00130442	1.38e-08	0.195521	0.0603855	0.016403	0.093038	SAME	0.934735	0.773769	chr22:38081923	FALSE	FALSE
AMD EUR	chr15:58388755:T:C	chr15:58388755:T:C	C	T	rs2043085	-0.139262	0.139262	4.3e-15	58328698	58474416	145.718	641	mQTL	chr15:58387985:C:T	rs7177289	ENSG00000128918	ALDH1A2	cg10704055	Retina	0.000153914	2.65e-11	-0.167075	0.043021	0.017447	-0.11614	SAME	0.385568	0.62009	chr15:58387985	FALSE	FALSE
AMD EUR	chr5:39327786:G:T	chr5:39327786:G:T	T	G	rs62358361	0.587787	0.587787	1.3e-14	38362854	40352636	1989.78	266	mQTL	chr5:39400254:T:C	rs10043562	ENSG00000113600	C9	cg23454504	Retina	0.0487686	0.0041	-0.0291499	0.0146719	0.019392	0.055628	OPPOSITE	0.92517	0.537133	chr5:39400254	FALSE	FALSE
AMD EUR	chr5:39327786:G:T	chr5:39327786:G:T	T	G	rs62358361	0.587787	0.587787	1.3e-14	38362854	40352636	1989.78	266	mQTL	chr5:39400254:T:C	rs10043562	ENSG00000153071	DAB2	cg23454504	Retina	0.0487686	0.0041	-0.0291499	0.0146719	0.019392	0.055628	OPPOSITE	0.92517	0.537133	chr5:39400254	FALSE	FALSE
AMD EUR	chr7:100393925:C:T	chr7:100393925:C:T	T	C	rs7803454	0.122218	0.122218	4.8e-09	99914532	100638465	723.933	453	mQTL	chr7:99959594:T:C	rs6962405	ENSG00000160862	AZGP1	cg22792024	Retina	4.4213e-11	0.000557	0.187932	0.0264343	0.016833	0.058086	SAME	0.884846	0.447491	chr7:99959594	FALSE	FALSE
AMD EUR	chr7:100393925:C:T	chr7:100393925:C:T	T	C	rs7803454	0.122218	0.122218	4.8e-09	99914532	100638465	723.933	453	mQTL	chr7:99959594:T:C	rs6962405	ENSG00000195401	Y_RNA	cg11013060	Retina	4.66311e-08	0.000557	0.316755	0.0550155	0.016833	0.058086	SAME	0.899089	0.446135	chr7:99959594	FALSE	FALSE
AMD EUR	chr7:100393925:C:T	chr7:100393925:C:T	T	C	rs7803454	0.122218	0.122218	4.8e-09	99914532	100638465	723.933	453	mQTL	chr7:99959594:T:C	rs6962405	ENSG00000199200	Y_RNA	cg11013060	Retina	4.66311e-08	0.000557	0.316755	0.0550155	0.016833	0.058086	SAME	0.899089	0.446135	chr7:99959594	FALSE	FALSE
AMD EUR	chr7:100393925:C:T	chr7:100393925:C:T	T	C	rs7803454	0.122218	0.122218	4.8e-09	99914532	100638465	723.933	453	mQTL	chr7:99959594:T:C	rs6962405	ENSG00000199201	Y_RNA	cg11013060	Retina	4.66311e-08	0.000557	0.316755	0.0550155	0.016833	0.058086	SAME	0.899089	0.446135	chr7:99959594	FALSE	FALSE
AMD EUR	chr7:100393925:C:T	chr7:100393925:C:T	T	C	rs7803454	0.122218	0.122218	4.8e-09	99914532	100638465	723.933	453	mQTL	chr7:99959594:T:C	rs6962405	ENSG00000199203	Y_RNA	cg11013060	Retina	4.66311e-08	0.000557	0.316755	0.0550155	0.016833	0.058086	SAME	0.899089	0.446135	chr7:99959594	FALSE	FALSE
AMD EUR	chr7:100393925:C:T	chr7:100393925:C:T	T	C	rs7803454	0.122218	0.122218	4.8e-09	99914532	100638465	723.933	453	mQTL	chr7:99959594:T:C	rs6962405	ENSG00000199204	Y_RNA	cg11013060	Retina	4.66311e-08	0.000557	0.316755	0.0550155	0.016833	0.058086	SAME	0.899089	0.446135	chr7:99959594	FALSE	FALSE
AMD EUR	chr7:100393925:C:T	chr7:100393925:C:T	T	C	rs7803454	0.122218	0.122218	4.8e-09	99914532	100638465	723.933	453	mQTL	chr7:99959594:T:C	rs6962405	ENSG00000199220	Y_RNA	cg11013060	Retina	4.66311e-08	0.000557	0.316755	0.0550155	0.016833	0.058086	SAME	0.899089	0.446135	chr7:99959594	FALSE	FALSE
AMD EUR	chr7:100393925:C:T	chr7:100393925:C:T	T	C	rs7803454	0.122218	0.122218	4.8e-09	99914532	100638465	723.933	453	mQTL	chr7:99959594:T:C	rs6962405	ENSG00000199222	Y_RNA	cg11013060	Retina	4.66311e-08	0.000557	0.316755	0.0550155	0.016833	0.058086	SAME	0.899089	0.446135	chr7:99959594	FALSE	FALSE
AMD EUR	chr7:100393925:C:T	chr7:100393925:C:T	T	C	rs7803454	0.122218	0.122218	4.8e-09	99914532	100638465	723.933	453	mQTL	chr7:99959594:T:C	rs6962405	ENSG00000199223	Y_RNA	cg11013060	Retina	4.66311e-08	0.000557	0.316755	0.0550155	0.016833	0.058086	SAME	0.899089	0.446135	chr7:99959594	FALSE	FALSE
AMD EUR	chr7:100393925:C:T	chr7:100393925:C:T	T	C	rs7803454	0.122218	0.122218	4.8e-09	99914532	100638465	723.933	453	mQTL	chr7:99959594:T:C	rs6962405	ENSG00000199224	Y_RNA	cg11013060	Retina	4.66311e-08	0.000557	0.316755	0.0550155	0.016833	0.058086	SAME	0.899089	0.446135	chr7:99959594	FALSE	FALSE
AMD EUR	chr7:100393925:C:T	chr7:100393925:C:T	T	C	rs7803454	0.122218	0.122218	4.8e-09	99914532	100638465	723.933	453	mQTL	chr7:99959594:T:C	rs6962405	ENSG00000199241	Y_RNA	cg11013060	Retina	4.66311e-08	0.000557	0.316755	0.0550155	0.016833	0.058086	SAME	0.899089	0.446135	chr7:99959594	FALSE	FALSE
AMD EUR	chr7:100393925:C:T	chr7:100393925:C:T	T	C	rs7803454	0.122218	0.122218	4.8e-09	99914532	100638465	723.933	453	mQTL	chr7:99959594:T:C	rs6962405	ENSG00000199245	Y_RNA	cg11013060	Retina	4.66311e-08	0.000557	0.316755	0.0550155	0.016833	0.058086	SAME	0.899089	0.446135	chr7:99959594	FALSE	FALSE
AMD EUR	chr7:100393925:C:T	chr7:100393925:C:T	T	C	rs7803454	0.122218	0.122218	4.8e-09	99914532	100638465	723.933	453	mQTL	chr7:99959594:T:C	rs6962405	ENSG00000199263	Y_RNA	cg11013060	Retina	4.66311e-08	0.000557	0.316755	0.0550155	0.016833	0.058086	SAME	0.899089	0.446135	chr7:99959594	FALSE	FALSE
AMD EUR	chr7:100393925:C:T	chr7:100393925:C:T	T	C	rs7803454	0.122218	0.122218	4.8e-09	99914532	100638465	723.933	453	mQTL	chr7:99959594:T:C	rs6962405	ENSG00000199273	Y_RNA	cg11013060	Retina	4.66311e-08	0.000557	0.316755	0.0550155	0.016833	0.058086	SAME	0.899089	0.446135	chr7:99959594	FALSE	FALSE
AMD EUR	chr7:100393925:C:T	chr7:100393925:C:T	T	C	rs7803454	0.122218	0.122218	4.8e-09	99914532	100638465	723.933	453	mQTL	chr7:99959594:T:C	rs6962405	ENSG00000199285	Y_RNA	cg11013060	Retina	4.66311e-08	0.000557	0.316755	0.0550155	0.016833	0.058086	SAME	0.899089	0.446135	chr7:99959594	FALSE	FALSE
AMD EUR	chr7:100393925:C:T	chr7:100393925:C:T	T	C	rs7803454	0.122218	0.122218	4.8e-09	99914532	100638465	723.933	453	mQTL	chr7:99959594:T:C	rs6962405	ENSG00000199290	Y_RNA	cg11013060	Retina	4.66311e-08	0.000557	0.316755	0.0550155	0.016833	0.058086	SAME	0.899089	0.446135	chr7:99959594	FALSE	FALSE
AMD EUR	chr7:100393925:C:T	chr7:100393925:C:T	T	C	rs7803454	0.122218	0.122218	4.8e-09	99914532	100638465	723.933	453	mQTL	chr7:99959594:T:C	rs6962405	ENSG00000199291	Y_RNA	cg11013060	Retina	4.66311e-08	0.000557	0.316755	0.0550155	0.016833	0.058086	SAME	0.899089	0.446135	chr7:99959594	FALSE	FALSE
AMD EUR	chr7:100393925:C:T	chr7:100393925:C:T	T	C	rs7803454	0.122218	0.122218	4.8e-09	99914532	100638465	723.933	453	mQTL	chr7:99959594:T:C	rs6962405	ENSG00000199303	Y_RNA	cg11013060	Retina	4.66311e-08	0.000557	0.316755	0.0550155	0.016833	0.058086	SAME	0.899089	0.446135	chr7:99959594	FALSE	FALSE
AMD EUR	chr7:100393925:C:T	chr7:100393925:C:T	T	C	rs7803454	0.122218	0.122218	4.8e-09	99914532	100638465	723.933	453	mQTL	chr7:99959594:T:C	rs6962405	ENSG00000199331	Y_RNA	cg11013060	Retina	4.66311e-08	0.000557	0.316755	0.0550155	0.016833	0.058086	SAME	0.899089	0.446135	chr7:99959594	FALSE	FALSE
AMD EUR	chr7:100393925:C:T	chr7:100393925:C:T	T	C	rs7803454	0.122218	0.122218	4.8e-09	99914532	100638465	723.933	453	mQTL	chr7:99959594:T:C	rs6962405	ENSG00000199332	Y_RNA	cg11013060	Retina	4.66311e-08	0.000557	0.316755	0.0550155	0.016833	0.058086	SAME	0.899089	0.446135	chr7:99959594	FALSE	FALSE
AMD EUR	chr7:100393925:C:T	chr7:100393925:C:T	T	C	rs7803454	0.122218	0.122218	4.8e-09	99914532	100638465	723.933	453	mQTL	chr7:99959594:T:C	rs6962405	ENSG00000199349	Y_RNA	cg11013060	Retina	4.66311e-08	0.000557	0.316755	0.0550155	0.016833	0.058086	SAME	0.899089	0.446135	chr7:99959594	FALSE	FALSE
AMD EUR	chr7:100393925:C:T	chr7:100393925:C:T	T	C	rs7803454	0.122218	0.122218	4.8e-09	99914532	100638465	723.933	453	mQTL	chr7:99959594:T:C	rs6962405	ENSG00000199357	Y_RNA	cg11013060	Retina	4.66311e-08	0.000557	0.316755	0.0550155	0.016833	0.058086	SAME	0.899089	0.446135	chr7:99959594	FALSE	FALSE
AMD EUR	chr7:100393925:C:T	chr7:100393925:C:T	T	C	rs7803454	0.122218	0.122218	4.8e-09	99914532	100638465	723.933	453	mQTL	chr7:99959594:T:C	rs6962405	ENSG00000199362	Y_RNA	cg11013060	Retina	4.66311e-08	0.000557	0.316755	0.0550155	0.016833	0.058086	SAME	0.899089	0.446135	chr7:99959594	FALSE	FALSE
AMD EUR	chr7:100393925:C:T	chr7:100393925:C:T	T	C	rs7803454	0.122218	0.122218	4.8e-09	99914532	100638465	723.933	453	mQTL	chr7:99959594:T:C	rs6962405	ENSG00000199366	Y_RNA	cg11013060	Retina	4.66311e-08	0.000557	0.316755	0.0550155	0.016833	0.058086	SAME	0.899089	0.446135	chr7:99959594	FALSE	FALSE
AMD EUR	chr7:100393925:C:T	chr7:100393925:C:T	T	C	rs7803454	0.122218	0.122218	4.8e-09	99914532	100638465	723.933	453	mQTL	chr7:99959594:T:C	rs6962405	ENSG00000199378	Y_RNA	cg11013060	Retina	4.66311e-08	0.000557	0.316755	0.0550155	0.016833	0.058086	SAME	0.899089	0.446135	chr7:99959594	FALSE	FALSE
AMD EUR	chr7:100393925:C:T	chr7:100393925:C:T	T	C	rs7803454	0.122218	0.122218	4.8e-09	99914532	100638465	723.933	453	mQTL	chr7:99959594:T:C	rs6962405	ENSG00000199398	Y_RNA	cg11013060	Retina	4.66311e-08	0.000557	0.316755	0.0550155	0.016833	0.058086	SAME	0.899089	0.446135	chr7:99959594	FALSE	FALSE
AMD EUR	chr7:100393925:C:T	chr7:100393925:C:T	T	C	rs7803454	0.122218	0.122218	4.8e-09	99914532	100638465	723.933	453	mQTL	chr7:99959594:T:C	rs6962405	ENSG00000199409	Y_RNA	cg11013060	Retina	4.66311e-08	0.000557	0.316755	0.0550155	0.016833	0.058086	SAME	0.899089	0.446135	chr7:99959594	FALSE	FALSE
AMD EUR	chr7:100393925:C:T	chr7:100393925:C:T	T	C	rs7803454	0.122218	0.122218	4.8e-09	99914532	100638465	723.933	453	mQTL	chr7:99959594:T:C	rs6962405	ENSG00000199410	Y_RNA	cg11013060	Retina	4.66311e-08	0.000557	0.316755	0.0550155	0.016833	0.058086	SAME	0.899089	0.446135	chr7:99959594	FALSE	FALSE
AMD EUR	chr7:100393925:C:T	chr7:100393925:C:T	T	C	rs7803454	0.122218	0.122218	4.8e-09	99914532	100638465	723.933	453	mQTL	chr7:99959594:T:C	rs6962405	ENSG00000199424	Y_RNA	cg11013060	Retina	4.66311e-08	0.000557	0.316755	0.0550155	0.016833	0.058086	SAME	0.899089	0.446135	chr7:99959594	FALSE	FALSE
AMD EUR	chr7:100393925:C:T	chr7:100393925:C:T	T	C	rs7803454	0.122218	0.122218	4.8e-09	99914532	100638465	723.933	453	mQTL	chr7:99959594:T:C	rs6962405	ENSG00000199440	Y_RNA	cg11013060	Retina	4.66311e-08	0.000557	0.316755	0.0550155	0.016833	0.058086	SAME	0.899089	0.446135	chr7:99959594	FALSE	FALSE
AMD EUR	chr7:100393925:C:T	chr7:100393925:C:T	T	C	rs7803454	0.122218	0.122218	4.8e-09	99914532	100638465	723.933	453	mQTL	chr7:99959594:T:C	rs6962405	ENSG00000199442	Y_RNA	cg11013060	Retina	4.66311e-08	0.000557	0.316755	0.0550155	0.016833	0.058086	SAME	0.899089	0.446135	chr7:99959594	FALSE	FALSE
AMD EUR	chr7:100393925:C:T	chr7:100393925:C:T	T	C	rs7803454	0.122218	0.122218	4.8e-09	99914532	100638465	723.933	453	mQTL	chr7:99959594:T:C	rs6962405	ENSG00000199444	Y_RNA	cg11013060	Retina	4.66311e-08	0.000557	0.316755	0.0550155	0.016833	0.058086	SAME	0.899089	0.446135	chr7:99959594	FALSE	FALSE
AMD EUR	chr7:100393925:C:T	chr7:100393925:C:T	T	C	rs7803454	0.122218	0.122218	4.8e-09	99914532	100638465	723.933	453	mQTL	chr7:99959594:T:C	rs6962405	ENSG00000199459	Y_RNA	cg11013060	Retina	4.66311e-08	0.000557	0.316755	0.0550155	0.016833	0.058086	SAME	0.899089	0.446135	chr7:99959594	FALSE	FALSE
AMD EUR	chr7:100393925:C:T	chr7:100393925:C:T	T	C	rs7803454	0.122218	0.122218	4.8e-09	99914532	100638465	723.933	453	mQTL	chr7:99959594:T:C	rs6962405	ENSG00000199461	Y_RNA	cg11013060	Retina	4.66311e-08	0.000557	0.316755	0.0550155	0.016833	0.058086	SAME	0.899089	0.446135	chr7:99959594	FALSE	FALSE
AMD EUR	chr7:100393925:C:T	chr7:100393925:C:T	T	C	rs7803454	0.122218	0.122218	4.8e-09	99914532	100638465	723.933	453	mQTL	chr7:99959594:T:C	rs6962405	ENSG00000199466	Y_RNA	cg11013060	Retina	4.66311e-08	0.000557	0.316755	0.0550155	0.016833	0.058086	SAME	0.899089	0.446135	chr7:99959594	FALSE	FALSE
AMD EUR	chr7:100393925:C:T	chr7:100393925:C:T	T	C	rs7803454	0.122218	0.122218	4.8e-09	99914532	100638465	723.933	453	mQTL	chr7:99959594:T:C	rs6962405	ENSG00000199471	Y_RNA	cg11013060	Retina	4.66311e-08	0.000557	0.316755	0.0550155	0.016833	0.058086	SAME	0.899089	0.446135	chr7:99959594	FALSE	FALSE
AMD EUR	chr7:100393925:C:T	chr7:100393925:C:T	T	C	rs7803454	0.122218	0.122218	4.8e-09	99914532	100638465	723.933	453	mQTL	chr7:99959594:T:C	rs6962405	ENSG00000199472	Y_RNA	cg11013060	Retina	4.66311e-08	0.000557	0.316755	0.0550155	0.016833	0.058086	SAME	0.899089	0.446135	chr7:99959594	FALSE	FALSE
AMD EUR	chr7:100393925:C:T	chr7:100393925:C:T	T	C	rs7803454	0.122218	0.122218	4.8e-09	99914532	100638465	723.933	453	mQTL	chr7:99959594:T:C	rs6962405	ENSG00000199476	Y_RNA	cg11013060	Retina	4.66311e-08	0.000557	0.316755	0.0550155	0.016833	0.058086	SAME	0.899089	0.446135	chr7:99959594	FALSE	FALSE
AMD EUR	chr7:100393925:C:T	chr7:100393925:C:T	T	C	rs7803454	0.122218	0.122218	4.8e-09	99914532	100638465	723.933	453	mQTL	chr7:99959594:T:C	rs6962405	ENSG00000199487	Y_RNA	cg11013060	Retina	4.66311e-08	0.000557	0.316755	0.0550155	0.016833	0.058086	SAME	0.899089	0.446135	chr7:99959594	FALSE	FALSE
AMD EUR	chr7:100393925:C:T	chr7:100393925:C:T	T	C	rs7803454	0.122218	0.122218	4.8e-09	99914532	100638465	723.933	453	mQTL	chr7:99959594:T:C	rs6962405	ENSG00000199490	Y_RNA	cg11013060	Retina	4.66311e-08	0.000557	0.316755	0.0550155	0.016833	0.058086	SAME	0.899089	0.446135	chr7:99959594	FALSE	FALSE
AMD EUR	chr7:100393925:C:T	chr7:100393925:C:T	T	C	rs7803454	0.122218	0.122218	4.8e-09	99914532	100638465	723.933	453	mQTL	chr7:99959594:T:C	rs6962405	ENSG00000199515	Y_RNA	cg11013060	Retina	4.66311e-08	0.000557	0.316755	0.0550155	0.016833	0.058086	SAME	0.899089	0.446135	chr7:99959594	FALSE	FALSE
AMD EUR	chr7:100393925:C:T	chr7:100393925:C:T	T	C	rs7803454	0.122218	0.122218	4.8e-09	99914532	100638465	723.933	453	mQTL	chr7:99959594:T:C	rs6962405	ENSG00000199516	Y_RNA	cg11013060	Retina	4.66311e-08	0.000557	0.316755	0.0550155	0.016833	0.058086	SAME	0.899089	0.446135	chr7:99959594	FALSE	FALSE
AMD EUR	chr7:100393925:C:T	chr7:100393925:C:T	T	C	rs7803454	0.122218	0.122218	4.8e-09	99914532	100638465	723.933	453	mQTL	chr7:99959594:T:C	rs6962405	ENSG00000199530	Y_RNA	cg11013060	Retina	4.66311e-08	0.000557	0.316755	0.0550155	0.016833	0.058086	SAME	0.899089	0.446135	chr7:99959594	FALSE	FALSE
AMD EUR	chr7:100393925:C:T	chr7:100393925:C:T	T	C	rs7803454	0.122218	0.122218	4.8e-09	99914532	100638465	723.933	453	mQTL	chr7:99959594:T:C	rs6962405	ENSG00000199540	Y_RNA	cg11013060	Retina	4.66311e-08	0.000557	0.316755	0.0550155	0.016833	0.058086	SAME	0.899089	0.446135	chr7:99959594	FALSE	FALSE
AMD EUR	chr7:100393925:C:T	chr7:100393925:C:T	T	C	rs7803454	0.122218	0.122218	4.8e-09	99914532	100638465	723.933	453	mQTL	chr7:99959594:T:C	rs6962405	ENSG00000199546	Y_RNA	cg11013060	Retina	4.66311e-08	0.000557	0.316755	0.0550155	0.016833	0.058086	SAME	0.899089	0.446135	chr7:99959594	FALSE	FALSE
AMD EUR	chr7:100393925:C:T	chr7:100393925:C:T	T	C	rs7803454	0.122218	0.122218	4.8e-09	99914532	100638465	723.933	453	mQTL	chr7:99959594:T:C	rs6962405	ENSG00000199550	Y_RNA	cg11013060	Retina	4.66311e-08	0.000557	0.316755	0.0550155	0.016833	0.058086	SAME	0.899089	0.446135	chr7:99959594	FALSE	FALSE
AMD EUR	chr7:100393925:C:T	chr7:100393925:C:T	T	C	rs7803454	0.122218	0.122218	4.8e-09	99914532	100638465	723.933	453	mQTL	chr7:99959594:T:C	rs6962405	ENSG00000199565	Y_RNA	cg11013060	Retina	4.66311e-08	0.000557	0.316755	0.0550155	0.016833	0.058086	SAME	0.899089	0.446135	chr7:99959594	FALSE	FALSE
AMD EUR	chr7:100393925:C:T	chr7:100393925:C:T	T	C	rs7803454	0.122218	0.122218	4.8e-09	99914532	100638465	723.933	453	mQTL	chr7:99959594:T:C	rs6962405	ENSG00000199567	Y_RNA	cg11013060	Retina	4.66311e-08	0.000557	0.316755	0.0550155	0.016833	0.058086	SAME	0.899089	0.446135	chr7:99959594	FALSE	FALSE
AMD EUR	chr7:100393925:C:T	chr7:100393925:C:T	T	C	rs7803454	0.122218	0.122218	4.8e-09	99914532	100638465	723.933	453	mQTL	chr7:99959594:T:C	rs6962405	ENSG00000199580	Y_RNA	cg11013060	Retina	4.66311e-08	0.000557	0.316755	0.0550155	0.016833	0.058086	SAME	0.899089	0.446135	chr7:99959594	FALSE	FALSE
AMD EUR	chr7:100393925:C:T	chr7:100393925:C:T	T	C	rs7803454	0.122218	0.122218	4.8e-09	99914532	100638465	723.933	453	mQTL	chr7:99959594:T:C	rs6962405	ENSG00000199584	Y_RNA	cg11013060	Retina	4.66311e-08	0.000557	0.316755	0.0550155	0.016833	0.058086	SAME	0.899089	0.446135	chr7:99959594	FALSE	FALSE
AMD EUR	chr7:100393925:C:T	chr7:100393925:C:T	T	C	rs7803454	0.122218	0.122218	4.8e-09	99914532	100638465	723.933	453	mQTL	chr7:99959594:T:C	rs6962405	ENSG00000199591	Y_RNA	cg11013060	Retina	4.66311e-08	0.000557	0.316755	0.0550155	0.016833	0.058086	SAME	0.899089	0.446135	chr7:99959594	FALSE	FALSE
AMD EUR	chr7:100393925:C:T	chr7:100393925:C:T	T	C	rs7803454	0.122218	0.122218	4.8e-09	99914532	100638465	723.933	453	mQTL	chr7:99959594:T:C	rs6962405	ENSG00000199595	Y_RNA	cg11013060	Retina	4.66311e-08	0.000557	0.316755	0.0550155	0.016833	0.058086	SAME	0.899089	0.446135	chr7:99959594	FALSE	FALSE
AMD EUR	chr7:100393925:C:T	chr7:100393925:C:T	T	C	rs7803454	0.122218	0.122218	4.8e-09	99914532	100638465	723.933	453	mQTL	chr7:99959594:T:C	rs6962405	ENSG00000199630	Y_RNA	cg11013060	Retina	4.66311e-08	0.000557	0.316755	0.0550155	0.016833	0.058086	SAME	0.899089	0.446135	chr7:99959594	FALSE	FALSE
AMD EUR	chr7:100393925:C:T	chr7:100393925:C:T	T	C	rs7803454	0.122218	0.122218	4.8e-09	99914532	100638465	723.933	453	mQTL	chr7:99959594:T:C	rs6962405	ENSG00000199635	Y_RNA	cg11013060	Retina	4.66311e-08	0.000557	0.316755	0.0550155	0.016833	0.058086	SAME	0.899089	0.446135	chr7:99959594	FALSE	FALSE
AMD EUR	chr7:100393925:C:T	chr7:100393925:C:T	T	C	rs7803454	0.122218	0.122218	4.8e-09	99914532	100638465	723.933	453	mQTL	chr7:99959594:T:C	rs6962405	ENSG00000199636	Y_RNA	cg11013060	Retina	4.66311e-08	0.000557	0.316755	0.0550155	0.016833	0.058086	SAME	0.899089	0.446135	chr7:99959594	FALSE	FALSE
AMD EUR	chr7:100393925:C:T	chr7:100393925:C:T	T	C	rs7803454	0.122218	0.122218	4.8e-09	99914532	100638465	723.933	453	mQTL	chr7:99959594:T:C	rs6962405	ENSG00000199667	Y_RNA	cg11013060	Retina	4.66311e-08	0.000557	0.316755	0.0550155	0.016833	0.058086	SAME	0.899089	0.446135	chr7:99959594	FALSE	FALSE
AMD EUR	chr7:100393925:C:T	chr7:100393925:C:T	T	C	rs7803454	0.122218	0.122218	4.8e-09	99914532	100638465	723.933	453	mQTL	chr7:99959594:T:C	rs6962405	ENSG00000199668	Y_RNA	cg11013060	Retina	4.66311e-08	0.000557	0.316755	0.0550155	0.016833	0.058086	SAME	0.899089	0.446135	chr7:99959594	FALSE	FALSE
AMD EUR	chr7:100393925:C:T	chr7:100393925:C:T	T	C	rs7803454	0.122218	0.122218	4.8e-09	99914532	100638465	723.933	453	mQTL	chr7:99959594:T:C	rs6962405	ENSG00000199676	Y_RNA	cg11013060	Retina	4.66311e-08	0.000557	0.316755	0.0550155	0.016833	0.058086	SAME	0.899089	0.446135	chr7:99959594	FALSE	FALSE
AMD EUR	chr7:100393925:C:T	chr7:100393925:C:T	T	C	rs7803454	0.122218	0.122218	4.8e-09	99914532	100638465	723.933	453	mQTL	chr7:99959594:T:C	rs6962405	ENSG00000199677	Y_RNA	cg11013060	Retina	4.66311e-08	0.000557	0.316755	0.0550155	0.016833	0.058086	SAME	0.899089	0.446135	chr7:99959594	FALSE	FALSE
AMD EUR	chr7:100393925:C:T	chr7:100393925:C:T	T	C	rs7803454	0.122218	0.122218	4.8e-09	99914532	100638465	723.933	453	mQTL	chr7:99959594:T:C	rs6962405	ENSG00000199698	Y_RNA	cg11013060	Retina	4.66311e-08	0.000557	0.316755	0.0550155	0.016833	0.058086	SAME	0.899089	0.446135	chr7:99959594	FALSE	FALSE
AMD EUR	chr7:100393925:C:T	chr7:100393925:C:T	T	C	rs7803454	0.122218	0.122218	4.8e-09	99914532	100638465	723.933	453	mQTL	chr7:99959594:T:C	rs6962405	ENSG00000199701	Y_RNA	cg11013060	Retina	4.66311e-08	0.000557	0.316755	0.0550155	0.016833	0.058086	SAME	0.899089	0.446135	chr7:99959594	FALSE	FALSE
AMD EUR	chr7:100393925:C:T	chr7:100393925:C:T	T	C	rs7803454	0.122218	0.122218	4.8e-09	99914532	100638465	723.933	453	mQTL	chr7:99959594:T:C	rs6962405	ENSG00000199705	Y_RNA	cg11013060	Retina	4.66311e-08	0.000557	0.316755	0.0550155	0.016833	0.058086	SAME	0.899089	0.446135	chr7:99959594	FALSE	FALSE
AMD EUR	chr7:100393925:C:T	chr7:100393925:C:T	T	C	rs7803454	0.122218	0.122218	4.8e-09	99914532	100638465	723.933	453	mQTL	chr7:99959594:T:C	rs6962405	ENSG00000199710	Y_RNA	cg11013060	Retina	4.66311e-08	0.000557	0.316755	0.0550155	0.016833	0.058086	SAME	0.899089	0.446135	chr7:99959594	FALSE	FALSE
AMD EUR	chr7:100393925:C:T	chr7:100393925:C:T	T	C	rs7803454	0.122218	0.122218	4.8e-09	99914532	100638465	723.933	453	mQTL	chr7:99959594:T:C	rs6962405	ENSG00000199711	Y_RNA	cg11013060	Retina	4.66311e-08	0.000557	0.316755	0.0550155	0.016833	0.058086	SAME	0.899089	0.446135	chr7:99959594	FALSE	FALSE
AMD EUR	chr7:100393925:C:T	chr7:100393925:C:T	T	C	rs7803454	0.122218	0.122218	4.8e-09	99914532	100638465	723.933	453	mQTL	chr7:99959594:T:C	rs6962405	ENSG00000199715	Y_RNA	cg11013060	Retina	4.66311e-08	0.000557	0.316755	0.0550155	0.016833	0.058086	SAME	0.899089	0.446135	chr7:99959594	FALSE	FALSE
AMD EUR	chr7:100393925:C:T	chr7:100393925:C:T	T	C	rs7803454	0.122218	0.122218	4.8e-09	99914532	100638465	723.933	453	mQTL	chr7:99959594:T:C	rs6962405	ENSG00000199716	Y_RNA	cg11013060	Retina	4.66311e-08	0.000557	0.316755	0.0550155	0.016833	0.058086	SAME	0.899089	0.446135	chr7:99959594	FALSE	FALSE
AMD EUR	chr7:100393925:C:T	chr7:100393925:C:T	T	C	rs7803454	0.122218	0.122218	4.8e-09	99914532	100638465	723.933	453	mQTL	chr7:99959594:T:C	rs6962405	ENSG00000199732	Y_RNA	cg11013060	Retina	4.66311e-08	0.000557	0.316755	0.0550155	0.016833	0.058086	SAME	0.899089	0.446135	chr7:99959594	FALSE	FALSE
AMD EUR	chr7:100393925:C:T	chr7:100393925:C:T	T	C	rs7803454	0.122218	0.122218	4.8e-09	99914532	100638465	723.933	453	mQTL	chr7:99959594:T:C	rs6962405	ENSG00000199740	Y_RNA	cg11013060	Retina	4.66311e-08	0.000557	0.316755	0.0550155	0.016833	0.058086	SAME	0.899089	0.446135	chr7:99959594	FALSE	FALSE
AMD EUR	chr7:100393925:C:T	chr7:100393925:C:T	T	C	rs7803454	0.122218	0.122218	4.8e-09	99914532	100638465	723.933	453	mQTL	chr7:99959594:T:C	rs6962405	ENSG00000199751	Y_RNA	cg11013060	Retina	4.66311e-08	0.000557	0.316755	0.0550155	0.016833	0.058086	SAME	0.899089	0.446135	chr7:99959594	FALSE	FALSE
AMD EUR	chr7:100393925:C:T	chr7:100393925:C:T	T	C	rs7803454	0.122218	0.122218	4.8e-09	99914532	100638465	723.933	453	mQTL	chr7:99959594:T:C	rs6962405	ENSG00000199755	Y_RNA	cg11013060	Retina	4.66311e-08	0.000557	0.316755	0.0550155	0.016833	0.058086	SAME	0.899089	0.446135	chr7:99959594	FALSE	FALSE
AMD EUR	chr7:100393925:C:T	chr7:100393925:C:T	T	C	rs7803454	0.122218	0.122218	4.8e-09	99914532	100638465	723.933	453	mQTL	chr7:99959594:T:C	rs6962405	ENSG00000199756	Y_RNA	cg11013060	Retina	4.66311e-08	0.000557	0.316755	0.0550155	0.016833	0.058086	SAME	0.899089	0.446135	chr7:99959594	FALSE	FALSE
AMD EUR	chr7:100393925:C:T	chr7:100393925:C:T	T	C	rs7803454	0.122218	0.122218	4.8e-09	99914532	100638465	723.933	453	mQTL	chr7:99959594:T:C	rs6962405	ENSG00000199762	Y_RNA	cg11013060	Retina	4.66311e-08	0.000557	0.316755	0.0550155	0.016833	0.058086	SAME	0.899089	0.446135	chr7:99959594	FALSE	FALSE
AMD EUR	chr7:100393925:C:T	chr7:100393925:C:T	T	C	rs7803454	0.122218	0.122218	4.8e-09	99914532	100638465	723.933	453	mQTL	chr7:99959594:T:C	rs6962405	ENSG00000199764	Y_RNA	cg11013060	Retina	4.66311e-08	0.000557	0.316755	0.0550155	0.016833	0.058086	SAME	0.899089	0.446135	chr7:99959594	FALSE	FALSE
AMD EUR	chr7:100393925:C:T	chr7:100393925:C:T	T	C	rs7803454	0.122218	0.122218	4.8e-09	99914532	100638465	723.933	453	mQTL	chr7:99959594:T:C	rs6962405	ENSG00000199780	Y_RNA	cg11013060	Retina	4.66311e-08	0.000557	0.316755	0.0550155	0.016833	0.058086	SAME	0.899089	0.446135	chr7:99959594	FALSE	FALSE
AMD EUR	chr7:100393925:C:T	chr7:100393925:C:T	T	C	rs7803454	0.122218	0.122218	4.8e-09	99914532	100638465	723.933	453	mQTL	chr7:99959594:T:C	rs6962405	ENSG00000199781	Y_RNA	cg11013060	Retina	4.66311e-08	0.000557	0.316755	0.0550155	0.016833	0.058086	SAME	0.899089	0.446135	chr7:99959594	FALSE	FALSE
AMD EUR	chr7:100393925:C:T	chr7:100393925:C:T	T	C	rs7803454	0.122218	0.122218	4.8e-09	99914532	100638465	723.933	453	mQTL	chr7:99959594:T:C	rs6962405	ENSG00000199797	Y_RNA	cg11013060	Retina	4.66311e-08	0.000557	0.316755	0.0550155	0.016833	0.058086	SAME	0.899089	0.446135	chr7:99959594	FALSE	FALSE
AMD EUR	chr7:100393925:C:T	chr7:100393925:C:T	T	C	rs7803454	0.122218	0.122218	4.8e-09	99914532	100638465	723.933	453	mQTL	chr7:99959594:T:C	rs6962405	ENSG00000199801	Y_RNA	cg11013060	Retina	4.66311e-08	0.000557	0.316755	0.0550155	0.016833	0.058086	SAME	0.899089	0.446135	chr7:99959594	FALSE	FALSE
AMD EUR	chr7:100393925:C:T	chr7:100393925:C:T	T	C	rs7803454	0.122218	0.122218	4.8e-09	99914532	100638465	723.933	453	mQTL	chr7:99959594:T:C	rs6962405	ENSG00000199832	Y_RNA	cg11013060	Retina	4.66311e-08	0.000557	0.316755	0.0550155	0.016833	0.058086	SAME	0.899089	0.446135	chr7:99959594	FALSE	FALSE
AMD EUR	chr7:100393925:C:T	chr7:100393925:C:T	T	C	rs7803454	0.122218	0.122218	4.8e-09	99914532	100638465	723.933	453	mQTL	chr7:99959594:T:C	rs6962405	ENSG00000199840	Y_RNA	cg11013060	Retina	4.66311e-08	0.000557	0.316755	0.0550155	0.016833	0.058086	SAME	0.899089	0.446135	chr7:99959594	FALSE	FALSE
AMD EUR	chr7:100393925:C:T	chr7:100393925:C:T	T	C	rs7803454	0.122218	0.122218	4.8e-09	99914532	100638465	723.933	453	mQTL	chr7:99959594:T:C	rs6962405	ENSG00000199862	Y_RNA	cg11013060	Retina	4.66311e-08	0.000557	0.316755	0.0550155	0.016833	0.058086	SAME	0.899089	0.446135	chr7:99959594	FALSE	FALSE
AMD EUR	chr7:100393925:C:T	chr7:100393925:C:T	T	C	rs7803454	0.122218	0.122218	4.8e-09	99914532	100638465	723.933	453	mQTL	chr7:99959594:T:C	rs6962405	ENSG00000199866	Y_RNA	cg11013060	Retina	4.66311e-08	0.000557	0.316755	0.0550155	0.016833	0.058086	SAME	0.899089	0.446135	chr7:99959594	FALSE	FALSE
AMD EUR	chr7:100393925:C:T	chr7:100393925:C:T	T	C	rs7803454	0.122218	0.122218	4.8e-09	99914532	100638465	723.933	453	mQTL	chr7:99959594:T:C	rs6962405	ENSG00000199867	Y_RNA	cg11013060	Retina	4.66311e-08	0.000557	0.316755	0.0550155	0.016833	0.058086	SAME	0.899089	0.446135	chr7:99959594	FALSE	FALSE
AMD EUR	chr7:100393925:C:T	chr7:100393925:C:T	T	C	rs7803454	0.122218	0.122218	4.8e-09	99914532	100638465	723.933	453	mQTL	chr7:99959594:T:C	rs6962405	ENSG00000199870	Y_RNA	cg11013060	Retina	4.66311e-08	0.000557	0.316755	0.0550155	0.016833	0.058086	SAME	0.899089	0.446135	chr7:99959594	FALSE	FALSE
AMD EUR	chr7:100393925:C:T	chr7:100393925:C:T	T	C	rs7803454	0.122218	0.122218	4.8e-09	99914532	100638465	723.933	453	mQTL	chr7:99959594:T:C	rs6962405	ENSG00000199875	Y_RNA	cg11013060	Retina	4.66311e-08	0.000557	0.316755	0.0550155	0.016833	0.058086	SAME	0.899089	0.446135	chr7:99959594	FALSE	FALSE
AMD EUR	chr7:100393925:C:T	chr7:100393925:C:T	T	C	rs7803454	0.122218	0.122218	4.8e-09	99914532	100638465	723.933	453	mQTL	chr7:99959594:T:C	rs6962405	ENSG00000199881	Y_RNA	cg11013060	Retina	4.66311e-08	0.000557	0.316755	0.0550155	0.016833	0.058086	SAME	0.899089	0.446135	chr7:99959594	FALSE	FALSE
AMD EUR	chr7:100393925:C:T	chr7:100393925:C:T	T	C	rs7803454	0.122218	0.122218	4.8e-09	99914532	100638465	723.933	453	mQTL	chr7:99959594:T:C	rs6962405	ENSG00000199884	Y_RNA	cg11013060	Retina	4.66311e-08	0.000557	0.316755	0.0550155	0.016833	0.058086	SAME	0.899089	0.446135	chr7:99959594	FALSE	FALSE
AMD EUR	chr7:100393925:C:T	chr7:100393925:C:T	T	C	rs7803454	0.122218	0.122218	4.8e-09	99914532	100638465	723.933	453	mQTL	chr7:99959594:T:C	rs6962405	ENSG00000199890	Y_RNA	cg11013060	Retina	4.66311e-08	0.000557	0.316755	0.0550155	0.016833	0.058086	SAME	0.899089	0.446135	chr7:99959594	FALSE	FALSE
AMD EUR	chr7:100393925:C:T	chr7:100393925:C:T	T	C	rs7803454	0.122218	0.122218	4.8e-09	99914532	100638465	723.933	453	mQTL	chr7:99959594:T:C	rs6962405	ENSG00000199895	Y_RNA	cg11013060	Retina	4.66311e-08	0.000557	0.316755	0.0550155	0.016833	0.058086	SAME	0.899089	0.446135	chr7:99959594	FALSE	FALSE
AMD EUR	chr7:100393925:C:T	chr7:100393925:C:T	T	C	rs7803454	0.122218	0.122218	4.8e-09	99914532	100638465	723.933	453	mQTL	chr7:99959594:T:C	rs6962405	ENSG00000199899	Y_RNA	cg11013060	Retina	4.66311e-08	0.000557	0.316755	0.0550155	0.016833	0.058086	SAME	0.899089	0.446135	chr7:99959594	FALSE	FALSE
AMD EUR	chr7:100393925:C:T	chr7:100393925:C:T	T	C	rs7803454	0.122218	0.122218	4.8e-09	99914532	100638465	723.933	453	mQTL	chr7:99959594:T:C	rs6962405	ENSG00000199901	Y_RNA	cg11013060	Retina	4.66311e-08	0.000557	0.316755	0.0550155	0.016833	0.058086	SAME	0.899089	0.446135	chr7:99959594	FALSE	FALSE
AMD EUR	chr7:100393925:C:T	chr7:100393925:C:T	T	C	rs7803454	0.122218	0.122218	4.8e-09	99914532	100638465	723.933	453	mQTL	chr7:99959594:T:C	rs6962405	ENSG00000199911	Y_RNA	cg11013060	Retina	4.66311e-08	0.000557	0.316755	0.0550155	0.016833	0.058086	SAME	0.899089	0.446135	chr7:99959594	FALSE	FALSE
AMD EUR	chr7:100393925:C:T	chr7:100393925:C:T	T	C	rs7803454	0.122218	0.122218	4.8e-09	99914532	100638465	723.933	453	mQTL	chr7:99959594:T:C	rs6962405	ENSG00000199912	Y_RNA	cg11013060	Retina	4.66311e-08	0.000557	0.316755	0.0550155	0.016833	0.058086	SAME	0.899089	0.446135	chr7:99959594	FALSE	FALSE
AMD EUR	chr7:100393925:C:T	chr7:100393925:C:T	T	C	rs7803454	0.122218	0.122218	4.8e-09	99914532	100638465	723.933	453	mQTL	chr7:99959594:T:C	rs6962405	ENSG00000199913	Y_RNA	cg11013060	Retina	4.66311e-08	0.000557	0.316755	0.0550155	0.016833	0.058086	SAME	0.899089	0.446135	chr7:99959594	FALSE	FALSE
AMD EUR	chr7:100393925:C:T	chr7:100393925:C:T	T	C	rs7803454	0.122218	0.122218	4.8e-09	99914532	100638465	723.933	453	mQTL	chr7:99959594:T:C	rs6962405	ENSG00000199936	Y_RNA	cg11013060	Retina	4.66311e-08	0.000557	0.316755	0.0550155	0.016833	0.058086	SAME	0.899089	0.446135	chr7:99959594	FALSE	FALSE
AMD EUR	chr7:100393925:C:T	chr7:100393925:C:T	T	C	rs7803454	0.122218	0.122218	4.8e-09	99914532	100638465	723.933	453	mQTL	chr7:99959594:T:C	rs6962405	ENSG00000199938	Y_RNA	cg11013060	Retina	4.66311e-08	0.000557	0.316755	0.0550155	0.016833	0.058086	SAME	0.899089	0.446135	chr7:99959594	FALSE	FALSE
AMD EUR	chr7:100393925:C:T	chr7:100393925:C:T	T	C	rs7803454	0.122218	0.122218	4.8e-09	99914532	100638465	723.933	453	mQTL	chr7:99959594:T:C	rs6962405	ENSG00000199949	Y_RNA	cg11013060	Retina	4.66311e-08	0.000557	0.316755	0.0550155	0.016833	0.058086	SAME	0.899089	0.446135	chr7:99959594	FALSE	FALSE
AMD EUR	chr7:100393925:C:T	chr7:100393925:C:T	T	C	rs7803454	0.122218	0.122218	4.8e-09	99914532	100638465	723.933	453	mQTL	chr7:99959594:T:C	rs6962405	ENSG00000199962	Y_RNA	cg11013060	Retina	4.66311e-08	0.000557	0.316755	0.0550155	0.016833	0.058086	SAME	0.899089	0.446135	chr7:99959594	FALSE	FALSE
AMD EUR	chr7:100393925:C:T	chr7:100393925:C:T	T	C	rs7803454	0.122218	0.122218	4.8e-09	99914532	100638465	723.933	453	mQTL	chr7:99959594:T:C	rs6962405	ENSG00000199964	Y_RNA	cg11013060	Retina	4.66311e-08	0.000557	0.316755	0.0550155	0.016833	0.058086	SAME	0.899089	0.446135	chr7:99959594	FALSE	FALSE
AMD EUR	chr7:100393925:C:T	chr7:100393925:C:T	T	C	rs7803454	0.122218	0.122218	4.8e-09	99914532	100638465	723.933	453	mQTL	chr7:99959594:T:C	rs6962405	ENSG00000199979	Y_RNA	cg11013060	Retina	4.66311e-08	0.000557	0.316755	0.0550155	0.016833	0.058086	SAME	0.899089	0.446135	chr7:99959594	FALSE	FALSE
AMD EUR	chr7:100393925:C:T	chr7:100393925:C:T	T	C	rs7803454	0.122218	0.122218	4.8e-09	99914532	100638465	723.933	453	mQTL	chr7:99959594:T:C	rs6962405	ENSG00000200008	Y_RNA	cg11013060	Retina	4.66311e-08	0.000557	0.316755	0.0550155	0.016833	0.058086	SAME	0.899089	0.446135	chr7:99959594	FALSE	FALSE
AMD EUR	chr7:100393925:C:T	chr7:100393925:C:T	T	C	rs7803454	0.122218	0.122218	4.8e-09	99914532	100638465	723.933	453	mQTL	chr7:99959594:T:C	rs6962405	ENSG00000200011	Y_RNA	cg11013060	Retina	4.66311e-08	0.000557	0.316755	0.0550155	0.016833	0.058086	SAME	0.899089	0.446135	chr7:99959594	FALSE	FALSE
AMD EUR	chr7:100393925:C:T	chr7:100393925:C:T	T	C	rs7803454	0.122218	0.122218	4.8e-09	99914532	100638465	723.933	453	mQTL	chr7:99959594:T:C	rs6962405	ENSG00000200024	Y_RNA	cg11013060	Retina	4.66311e-08	0.000557	0.316755	0.0550155	0.016833	0.058086	SAME	0.899089	0.446135	chr7:99959594	FALSE	FALSE
AMD EUR	chr7:100393925:C:T	chr7:100393925:C:T	T	C	rs7803454	0.122218	0.122218	4.8e-09	99914532	100638465	723.933	453	mQTL	chr7:99959594:T:C	rs6962405	ENSG00000200040	Y_RNA	cg11013060	Retina	4.66311e-08	0.000557	0.316755	0.0550155	0.016833	0.058086	SAME	0.899089	0.446135	chr7:99959594	FALSE	FALSE
AMD EUR	chr7:100393925:C:T	chr7:100393925:C:T	T	C	rs7803454	0.122218	0.122218	4.8e-09	99914532	100638465	723.933	453	mQTL	chr7:99959594:T:C	rs6962405	ENSG00000200041	Y_RNA	cg11013060	Retina	4.66311e-08	0.000557	0.316755	0.0550155	0.016833	0.058086	SAME	0.899089	0.446135	chr7:99959594	FALSE	FALSE
AMD EUR	chr7:100393925:C:T	chr7:100393925:C:T	T	C	rs7803454	0.122218	0.122218	4.8e-09	99914532	100638465	723.933	453	mQTL	chr7:99959594:T:C	rs6962405	ENSG00000200049	Y_RNA	cg11013060	Retina	4.66311e-08	0.000557	0.316755	0.0550155	0.016833	0.058086	SAME	0.899089	0.446135	chr7:99959594	FALSE	FALSE
AMD EUR	chr7:100393925:C:T	chr7:100393925:C:T	T	C	rs7803454	0.122218	0.122218	4.8e-09	99914532	100638465	723.933	453	mQTL	chr7:99959594:T:C	rs6962405	ENSG00000200052	Y_RNA	cg11013060	Retina	4.66311e-08	0.000557	0.316755	0.0550155	0.016833	0.058086	SAME	0.899089	0.446135	chr7:99959594	FALSE	FALSE
AMD EUR	chr7:100393925:C:T	chr7:100393925:C:T	T	C	rs7803454	0.122218	0.122218	4.8e-09	99914532	100638465	723.933	453	mQTL	chr7:99959594:T:C	rs6962405	ENSG00000200059	Y_RNA	cg11013060	Retina	4.66311e-08	0.000557	0.316755	0.0550155	0.016833	0.058086	SAME	0.899089	0.446135	chr7:99959594	FALSE	FALSE
AMD EUR	chr7:100393925:C:T	chr7:100393925:C:T	T	C	rs7803454	0.122218	0.122218	4.8e-09	99914532	100638465	723.933	453	mQTL	chr7:99959594:T:C	rs6962405	ENSG00000200060	Y_RNA	cg11013060	Retina	4.66311e-08	0.000557	0.316755	0.0550155	0.016833	0.058086	SAME	0.899089	0.446135	chr7:99959594	FALSE	FALSE
AMD EUR	chr7:100393925:C:T	chr7:100393925:C:T	T	C	rs7803454	0.122218	0.122218	4.8e-09	99914532	100638465	723.933	453	mQTL	chr7:99959594:T:C	rs6962405	ENSG00000200065	Y_RNA	cg11013060	Retina	4.66311e-08	0.000557	0.316755	0.0550155	0.016833	0.058086	SAME	0.899089	0.446135	chr7:99959594	FALSE	FALSE
AMD EUR	chr7:100393925:C:T	chr7:100393925:C:T	T	C	rs7803454	0.122218	0.122218	4.8e-09	99914532	100638465	723.933	453	mQTL	chr7:99959594:T:C	rs6962405	ENSG00000200085	Y_RNA	cg11013060	Retina	4.66311e-08	0.000557	0.316755	0.0550155	0.016833	0.058086	SAME	0.899089	0.446135	chr7:99959594	FALSE	FALSE
AMD EUR	chr7:100393925:C:T	chr7:100393925:C:T	T	C	rs7803454	0.122218	0.122218	4.8e-09	99914532	100638465	723.933	453	mQTL	chr7:99959594:T:C	rs6962405	ENSG00000200090	Y_RNA	cg11013060	Retina	4.66311e-08	0.000557	0.316755	0.0550155	0.016833	0.058086	SAME	0.899089	0.446135	chr7:99959594	FALSE	FALSE
AMD EUR	chr7:100393925:C:T	chr7:100393925:C:T	T	C	rs7803454	0.122218	0.122218	4.8e-09	99914532	100638465	723.933	453	mQTL	chr7:99959594:T:C	rs6962405	ENSG00000200118	Y_RNA	cg11013060	Retina	4.66311e-08	0.000557	0.316755	0.0550155	0.016833	0.058086	SAME	0.899089	0.446135	chr7:99959594	FALSE	FALSE
AMD EUR	chr7:100393925:C:T	chr7:100393925:C:T	T	C	rs7803454	0.122218	0.122218	4.8e-09	99914532	100638465	723.933	453	mQTL	chr7:99959594:T:C	rs6962405	ENSG00000200120	Y_RNA	cg11013060	Retina	4.66311e-08	0.000557	0.316755	0.0550155	0.016833	0.058086	SAME	0.899089	0.446135	chr7:99959594	FALSE	FALSE
AMD EUR	chr7:100393925:C:T	chr7:100393925:C:T	T	C	rs7803454	0.122218	0.122218	4.8e-09	99914532	100638465	723.933	453	mQTL	chr7:99959594:T:C	rs6962405	ENSG00000200121	Y_RNA	cg11013060	Retina	4.66311e-08	0.000557	0.316755	0.0550155	0.016833	0.058086	SAME	0.899089	0.446135	chr7:99959594	FALSE	FALSE
AMD EUR	chr7:100393925:C:T	chr7:100393925:C:T	T	C	rs7803454	0.122218	0.122218	4.8e-09	99914532	100638465	723.933	453	mQTL	chr7:99959594:T:C	rs6962405	ENSG00000200135	Y_RNA	cg11013060	Retina	4.66311e-08	0.000557	0.316755	0.0550155	0.016833	0.058086	SAME	0.899089	0.446135	chr7:99959594	FALSE	FALSE
AMD EUR	chr7:100393925:C:T	chr7:100393925:C:T	T	C	rs7803454	0.122218	0.122218	4.8e-09	99914532	100638465	723.933	453	mQTL	chr7:99959594:T:C	rs6962405	ENSG00000200142	Y_RNA	cg11013060	Retina	4.66311e-08	0.000557	0.316755	0.0550155	0.016833	0.058086	SAME	0.899089	0.446135	chr7:99959594	FALSE	FALSE
AMD EUR	chr7:100393925:C:T	chr7:100393925:C:T	T	C	rs7803454	0.122218	0.122218	4.8e-09	99914532	100638465	723.933	453	mQTL	chr7:99959594:T:C	rs6962405	ENSG00000200162	Y_RNA	cg11013060	Retina	4.66311e-08	0.000557	0.316755	0.0550155	0.016833	0.058086	SAME	0.899089	0.446135	chr7:99959594	FALSE	FALSE
AMD EUR	chr7:100393925:C:T	chr7:100393925:C:T	T	C	rs7803454	0.122218	0.122218	4.8e-09	99914532	100638465	723.933	453	mQTL	chr7:99959594:T:C	rs6962405	ENSG00000200164	Y_RNA	cg11013060	Retina	4.66311e-08	0.000557	0.316755	0.0550155	0.016833	0.058086	SAME	0.899089	0.446135	chr7:99959594	FALSE	FALSE
AMD EUR	chr7:100393925:C:T	chr7:100393925:C:T	T	C	rs7803454	0.122218	0.122218	4.8e-09	99914532	100638465	723.933	453	mQTL	chr7:99959594:T:C	rs6962405	ENSG00000200170	Y_RNA	cg11013060	Retina	4.66311e-08	0.000557	0.316755	0.0550155	0.016833	0.058086	SAME	0.899089	0.446135	chr7:99959594	FALSE	FALSE
AMD EUR	chr7:100393925:C:T	chr7:100393925:C:T	T	C	rs7803454	0.122218	0.122218	4.8e-09	99914532	100638465	723.933	453	mQTL	chr7:99959594:T:C	rs6962405	ENSG00000200171	Y_RNA	cg11013060	Retina	4.66311e-08	0.000557	0.316755	0.0550155	0.016833	0.058086	SAME	0.899089	0.446135	chr7:99959594	FALSE	FALSE
AMD EUR	chr7:100393925:C:T	chr7:100393925:C:T	T	C	rs7803454	0.122218	0.122218	4.8e-09	99914532	100638465	723.933	453	mQTL	chr7:99959594:T:C	rs6962405	ENSG00000200174	Y_RNA	cg11013060	Retina	4.66311e-08	0.000557	0.316755	0.0550155	0.016833	0.058086	SAME	0.899089	0.446135	chr7:99959594	FALSE	FALSE
AMD EUR	chr7:100393925:C:T	chr7:100393925:C:T	T	C	rs7803454	0.122218	0.122218	4.8e-09	99914532	100638465	723.933	453	mQTL	chr7:99959594:T:C	rs6962405	ENSG00000200179	Y_RNA	cg11013060	Retina	4.66311e-08	0.000557	0.316755	0.0550155	0.016833	0.058086	SAME	0.899089	0.446135	chr7:99959594	FALSE	FALSE
AMD EUR	chr7:100393925:C:T	chr7:100393925:C:T	T	C	rs7803454	0.122218	0.122218	4.8e-09	99914532	100638465	723.933	453	mQTL	chr7:99959594:T:C	rs6962405	ENSG00000200201	Y_RNA	cg11013060	Retina	4.66311e-08	0.000557	0.316755	0.0550155	0.016833	0.058086	SAME	0.899089	0.446135	chr7:99959594	FALSE	FALSE
AMD EUR	chr7:100393925:C:T	chr7:100393925:C:T	T	C	rs7803454	0.122218	0.122218	4.8e-09	99914532	100638465	723.933	453	mQTL	chr7:99959594:T:C	rs6962405	ENSG00000200208	Y_RNA	cg11013060	Retina	4.66311e-08	0.000557	0.316755	0.0550155	0.016833	0.058086	SAME	0.899089	0.446135	chr7:99959594	FALSE	FALSE
AMD EUR	chr7:100393925:C:T	chr7:100393925:C:T	T	C	rs7803454	0.122218	0.122218	4.8e-09	99914532	100638465	723.933	453	mQTL	chr7:99959594:T:C	rs6962405	ENSG00000200209	Y_RNA	cg11013060	Retina	4.66311e-08	0.000557	0.316755	0.0550155	0.016833	0.058086	SAME	0.899089	0.446135	chr7:99959594	FALSE	FALSE
AMD EUR	chr7:100393925:C:T	chr7:100393925:C:T	T	C	rs7803454	0.122218	0.122218	4.8e-09	99914532	100638465	723.933	453	mQTL	chr7:99959594:T:C	rs6962405	ENSG00000200241	Y_RNA	cg11013060	Retina	4.66311e-08	0.000557	0.316755	0.0550155	0.016833	0.058086	SAME	0.899089	0.446135	chr7:99959594	FALSE	FALSE
AMD EUR	chr7:100393925:C:T	chr7:100393925:C:T	T	C	rs7803454	0.122218	0.122218	4.8e-09	99914532	100638465	723.933	453	mQTL	chr7:99959594:T:C	rs6962405	ENSG00000200252	Y_RNA	cg11013060	Retina	4.66311e-08	0.000557	0.316755	0.0550155	0.016833	0.058086	SAME	0.899089	0.446135	chr7:99959594	FALSE	FALSE
AMD EUR	chr7:100393925:C:T	chr7:100393925:C:T	T	C	rs7803454	0.122218	0.122218	4.8e-09	99914532	100638465	723.933	453	mQTL	chr7:99959594:T:C	rs6962405	ENSG00000200256	Y_RNA	cg11013060	Retina	4.66311e-08	0.000557	0.316755	0.0550155	0.016833	0.058086	SAME	0.899089	0.446135	chr7:99959594	FALSE	FALSE
AMD EUR	chr7:100393925:C:T	chr7:100393925:C:T	T	C	rs7803454	0.122218	0.122218	4.8e-09	99914532	100638465	723.933	453	mQTL	chr7:99959594:T:C	rs6962405	ENSG00000200261	Y_RNA	cg11013060	Retina	4.66311e-08	0.000557	0.316755	0.0550155	0.016833	0.058086	SAME	0.899089	0.446135	chr7:99959594	FALSE	FALSE
AMD EUR	chr7:100393925:C:T	chr7:100393925:C:T	T	C	rs7803454	0.122218	0.122218	4.8e-09	99914532	100638465	723.933	453	mQTL	chr7:99959594:T:C	rs6962405	ENSG00000200262	Y_RNA	cg11013060	Retina	4.66311e-08	0.000557	0.316755	0.0550155	0.016833	0.058086	SAME	0.899089	0.446135	chr7:99959594	FALSE	FALSE
AMD EUR	chr7:100393925:C:T	chr7:100393925:C:T	T	C	rs7803454	0.122218	0.122218	4.8e-09	99914532	100638465	723.933	453	mQTL	chr7:99959594:T:C	rs6962405	ENSG00000200283	Y_RNA	cg11013060	Retina	4.66311e-08	0.000557	0.316755	0.0550155	0.016833	0.058086	SAME	0.899089	0.446135	chr7:99959594	FALSE	FALSE
AMD EUR	chr7:100393925:C:T	chr7:100393925:C:T	T	C	rs7803454	0.122218	0.122218	4.8e-09	99914532	100638465	723.933	453	mQTL	chr7:99959594:T:C	rs6962405	ENSG00000200287	Y_RNA	cg11013060	Retina	4.66311e-08	0.000557	0.316755	0.0550155	0.016833	0.058086	SAME	0.899089	0.446135	chr7:99959594	FALSE	FALSE
AMD EUR	chr7:100393925:C:T	chr7:100393925:C:T	T	C	rs7803454	0.122218	0.122218	4.8e-09	99914532	100638465	723.933	453	mQTL	chr7:99959594:T:C	rs6962405	ENSG00000200291	Y_RNA	cg11013060	Retina	4.66311e-08	0.000557	0.316755	0.0550155	0.016833	0.058086	SAME	0.899089	0.446135	chr7:99959594	FALSE	FALSE
AMD EUR	chr7:100393925:C:T	chr7:100393925:C:T	T	C	rs7803454	0.122218	0.122218	4.8e-09	99914532	100638465	723.933	453	mQTL	chr7:99959594:T:C	rs6962405	ENSG00000200298	Y_RNA	cg11013060	Retina	4.66311e-08	0.000557	0.316755	0.0550155	0.016833	0.058086	SAME	0.899089	0.446135	chr7:99959594	FALSE	FALSE
AMD EUR	chr7:100393925:C:T	chr7:100393925:C:T	T	C	rs7803454	0.122218	0.122218	4.8e-09	99914532	100638465	723.933	453	mQTL	chr7:99959594:T:C	rs6962405	ENSG00000200305	Y_RNA	cg11013060	Retina	4.66311e-08	0.000557	0.316755	0.0550155	0.016833	0.058086	SAME	0.899089	0.446135	chr7:99959594	FALSE	FALSE
AMD EUR	chr7:100393925:C:T	chr7:100393925:C:T	T	C	rs7803454	0.122218	0.122218	4.8e-09	99914532	100638465	723.933	453	mQTL	chr7:99959594:T:C	rs6962405	ENSG00000200309	Y_RNA	cg11013060	Retina	4.66311e-08	0.000557	0.316755	0.0550155	0.016833	0.058086	SAME	0.899089	0.446135	chr7:99959594	FALSE	FALSE
AMD EUR	chr7:100393925:C:T	chr7:100393925:C:T	T	C	rs7803454	0.122218	0.122218	4.8e-09	99914532	100638465	723.933	453	mQTL	chr7:99959594:T:C	rs6962405	ENSG00000200314	Y_RNA	cg11013060	Retina	4.66311e-08	0.000557	0.316755	0.0550155	0.016833	0.058086	SAME	0.899089	0.446135	chr7:99959594	FALSE	FALSE
AMD EUR	chr7:100393925:C:T	chr7:100393925:C:T	T	C	rs7803454	0.122218	0.122218	4.8e-09	99914532	100638465	723.933	453	mQTL	chr7:99959594:T:C	rs6962405	ENSG00000200325	Y_RNA	cg11013060	Retina	4.66311e-08	0.000557	0.316755	0.0550155	0.016833	0.058086	SAME	0.899089	0.446135	chr7:99959594	FALSE	FALSE
AMD EUR	chr7:100393925:C:T	chr7:100393925:C:T	T	C	rs7803454	0.122218	0.122218	4.8e-09	99914532	100638465	723.933	453	mQTL	chr7:99959594:T:C	rs6962405	ENSG00000200332	Y_RNA	cg11013060	Retina	4.66311e-08	0.000557	0.316755	0.0550155	0.016833	0.058086	SAME	0.899089	0.446135	chr7:99959594	FALSE	FALSE
AMD EUR	chr7:100393925:C:T	chr7:100393925:C:T	T	C	rs7803454	0.122218	0.122218	4.8e-09	99914532	100638465	723.933	453	mQTL	chr7:99959594:T:C	rs6962405	ENSG00000200334	Y_RNA	cg11013060	Retina	4.66311e-08	0.000557	0.316755	0.0550155	0.016833	0.058086	SAME	0.899089	0.446135	chr7:99959594	FALSE	FALSE
AMD EUR	chr7:100393925:C:T	chr7:100393925:C:T	T	C	rs7803454	0.122218	0.122218	4.8e-09	99914532	100638465	723.933	453	mQTL	chr7:99959594:T:C	rs6962405	ENSG00000200344	Y_RNA	cg11013060	Retina	4.66311e-08	0.000557	0.316755	0.0550155	0.016833	0.058086	SAME	0.899089	0.446135	chr7:99959594	FALSE	FALSE
AMD EUR	chr7:100393925:C:T	chr7:100393925:C:T	T	C	rs7803454	0.122218	0.122218	4.8e-09	99914532	100638465	723.933	453	mQTL	chr7:99959594:T:C	rs6962405	ENSG00000200351	Y_RNA	cg11013060	Retina	4.66311e-08	0.000557	0.316755	0.0550155	0.016833	0.058086	SAME	0.899089	0.446135	chr7:99959594	FALSE	FALSE
AMD EUR	chr7:100393925:C:T	chr7:100393925:C:T	T	C	rs7803454	0.122218	0.122218	4.8e-09	99914532	100638465	723.933	453	mQTL	chr7:99959594:T:C	rs6962405	ENSG00000200361	Y_RNA	cg11013060	Retina	4.66311e-08	0.000557	0.316755	0.0550155	0.016833	0.058086	SAME	0.899089	0.446135	chr7:99959594	FALSE	FALSE
AMD EUR	chr7:100393925:C:T	chr7:100393925:C:T	T	C	rs7803454	0.122218	0.122218	4.8e-09	99914532	100638465	723.933	453	mQTL	chr7:99959594:T:C	rs6962405	ENSG00000200390	Y_RNA	cg11013060	Retina	4.66311e-08	0.000557	0.316755	0.0550155	0.016833	0.058086	SAME	0.899089	0.446135	chr7:99959594	FALSE	FALSE
AMD EUR	chr7:100393925:C:T	chr7:100393925:C:T	T	C	rs7803454	0.122218	0.122218	4.8e-09	99914532	100638465	723.933	453	mQTL	chr7:99959594:T:C	rs6962405	ENSG00000200391	Y_RNA	cg11013060	Retina	4.66311e-08	0.000557	0.316755	0.0550155	0.016833	0.058086	SAME	0.899089	0.446135	chr7:99959594	FALSE	FALSE
AMD EUR	chr7:100393925:C:T	chr7:100393925:C:T	T	C	rs7803454	0.122218	0.122218	4.8e-09	99914532	100638465	723.933	453	mQTL	chr7:99959594:T:C	rs6962405	ENSG00000200397	Y_RNA	cg11013060	Retina	4.66311e-08	0.000557	0.316755	0.0550155	0.016833	0.058086	SAME	0.899089	0.446135	chr7:99959594	FALSE	FALSE
AMD EUR	chr7:100393925:C:T	chr7:100393925:C:T	T	C	rs7803454	0.122218	0.122218	4.8e-09	99914532	100638465	723.933	453	mQTL	chr7:99959594:T:C	rs6962405	ENSG00000200419	Y_RNA	cg11013060	Retina	4.66311e-08	0.000557	0.316755	0.0550155	0.016833	0.058086	SAME	0.899089	0.446135	chr7:99959594	FALSE	FALSE
AMD EUR	chr7:100393925:C:T	chr7:100393925:C:T	T	C	rs7803454	0.122218	0.122218	4.8e-09	99914532	100638465	723.933	453	mQTL	chr7:99959594:T:C	rs6962405	ENSG00000200421	Y_RNA	cg11013060	Retina	4.66311e-08	0.000557	0.316755	0.0550155	0.016833	0.058086	SAME	0.899089	0.446135	chr7:99959594	FALSE	FALSE
AMD EUR	chr7:100393925:C:T	chr7:100393925:C:T	T	C	rs7803454	0.122218	0.122218	4.8e-09	99914532	100638465	723.933	453	mQTL	chr7:99959594:T:C	rs6962405	ENSG00000200427	Y_RNA	cg11013060	Retina	4.66311e-08	0.000557	0.316755	0.0550155	0.016833	0.058086	SAME	0.899089	0.446135	chr7:99959594	FALSE	FALSE
AMD EUR	chr7:100393925:C:T	chr7:100393925:C:T	T	C	rs7803454	0.122218	0.122218	4.8e-09	99914532	100638465	723.933	453	mQTL	chr7:99959594:T:C	rs6962405	ENSG00000200428	Y_RNA	cg11013060	Retina	4.66311e-08	0.000557	0.316755	0.0550155	0.016833	0.058086	SAME	0.899089	0.446135	chr7:99959594	FALSE	FALSE
AMD EUR	chr7:100393925:C:T	chr7:100393925:C:T	T	C	rs7803454	0.122218	0.122218	4.8e-09	99914532	100638465	723.933	453	mQTL	chr7:99959594:T:C	rs6962405	ENSG00000200432	Y_RNA	cg11013060	Retina	4.66311e-08	0.000557	0.316755	0.0550155	0.016833	0.058086	SAME	0.899089	0.446135	chr7:99959594	FALSE	FALSE
AMD EUR	chr7:100393925:C:T	chr7:100393925:C:T	T	C	rs7803454	0.122218	0.122218	4.8e-09	99914532	100638465	723.933	453	mQTL	chr7:99959594:T:C	rs6962405	ENSG00000200436	Y_RNA	cg11013060	Retina	4.66311e-08	0.000557	0.316755	0.0550155	0.016833	0.058086	SAME	0.899089	0.446135	chr7:99959594	FALSE	FALSE
AMD EUR	chr7:100393925:C:T	chr7:100393925:C:T	T	C	rs7803454	0.122218	0.122218	4.8e-09	99914532	100638465	723.933	453	mQTL	chr7:99959594:T:C	rs6962405	ENSG00000200448	Y_RNA	cg11013060	Retina	4.66311e-08	0.000557	0.316755	0.0550155	0.016833	0.058086	SAME	0.899089	0.446135	chr7:99959594	FALSE	FALSE
AMD EUR	chr7:100393925:C:T	chr7:100393925:C:T	T	C	rs7803454	0.122218	0.122218	4.8e-09	99914532	100638465	723.933	453	mQTL	chr7:99959594:T:C	rs6962405	ENSG00000200485	Y_RNA	cg11013060	Retina	4.66311e-08	0.000557	0.316755	0.0550155	0.016833	0.058086	SAME	0.899089	0.446135	chr7:99959594	FALSE	FALSE
AMD EUR	chr7:100393925:C:T	chr7:100393925:C:T	T	C	rs7803454	0.122218	0.122218	4.8e-09	99914532	100638465	723.933	453	mQTL	chr7:99959594:T:C	rs6962405	ENSG00000200494	Y_RNA	cg11013060	Retina	4.66311e-08	0.000557	0.316755	0.0550155	0.016833	0.058086	SAME	0.899089	0.446135	chr7:99959594	FALSE	FALSE
AMD EUR	chr7:100393925:C:T	chr7:100393925:C:T	T	C	rs7803454	0.122218	0.122218	4.8e-09	99914532	100638465	723.933	453	mQTL	chr7:99959594:T:C	rs6962405	ENSG00000200502	Y_RNA	cg11013060	Retina	4.66311e-08	0.000557	0.316755	0.0550155	0.016833	0.058086	SAME	0.899089	0.446135	chr7:99959594	FALSE	FALSE
AMD EUR	chr7:100393925:C:T	chr7:100393925:C:T	T	C	rs7803454	0.122218	0.122218	4.8e-09	99914532	100638465	723.933	453	mQTL	chr7:99959594:T:C	rs6962405	ENSG00000200506	Y_RNA	cg11013060	Retina	4.66311e-08	0.000557	0.316755	0.0550155	0.016833	0.058086	SAME	0.899089	0.446135	chr7:99959594	FALSE	FALSE
AMD EUR	chr7:100393925:C:T	chr7:100393925:C:T	T	C	rs7803454	0.122218	0.122218	4.8e-09	99914532	100638465	723.933	453	mQTL	chr7:99959594:T:C	rs6962405	ENSG00000200508	Y_RNA	cg11013060	Retina	4.66311e-08	0.000557	0.316755	0.0550155	0.016833	0.058086	SAME	0.899089	0.446135	chr7:99959594	FALSE	FALSE
AMD EUR	chr7:100393925:C:T	chr7:100393925:C:T	T	C	rs7803454	0.122218	0.122218	4.8e-09	99914532	100638465	723.933	453	mQTL	chr7:99959594:T:C	rs6962405	ENSG00000200521	Y_RNA	cg11013060	Retina	4.66311e-08	0.000557	0.316755	0.0550155	0.016833	0.058086	SAME	0.899089	0.446135	chr7:99959594	FALSE	FALSE
AMD EUR	chr7:100393925:C:T	chr7:100393925:C:T	T	C	rs7803454	0.122218	0.122218	4.8e-09	99914532	100638465	723.933	453	mQTL	chr7:99959594:T:C	rs6962405	ENSG00000200544	Y_RNA	cg11013060	Retina	4.66311e-08	0.000557	0.316755	0.0550155	0.016833	0.058086	SAME	0.899089	0.446135	chr7:99959594	FALSE	FALSE
AMD EUR	chr7:100393925:C:T	chr7:100393925:C:T	T	C	rs7803454	0.122218	0.122218	4.8e-09	99914532	100638465	723.933	453	mQTL	chr7:99959594:T:C	rs6962405	ENSG00000200547	Y_RNA	cg11013060	Retina	4.66311e-08	0.000557	0.316755	0.0550155	0.016833	0.058086	SAME	0.899089	0.446135	chr7:99959594	FALSE	FALSE
AMD EUR	chr7:100393925:C:T	chr7:100393925:C:T	T	C	rs7803454	0.122218	0.122218	4.8e-09	99914532	100638465	723.933	453	mQTL	chr7:99959594:T:C	rs6962405	ENSG00000200552	Y_RNA	cg11013060	Retina	4.66311e-08	0.000557	0.316755	0.0550155	0.016833	0.058086	SAME	0.899089	0.446135	chr7:99959594	FALSE	FALSE
AMD EUR	chr7:100393925:C:T	chr7:100393925:C:T	T	C	rs7803454	0.122218	0.122218	4.8e-09	99914532	100638465	723.933	453	mQTL	chr7:99959594:T:C	rs6962405	ENSG00000200553	Y_RNA	cg11013060	Retina	4.66311e-08	0.000557	0.316755	0.0550155	0.016833	0.058086	SAME	0.899089	0.446135	chr7:99959594	FALSE	FALSE
AMD EUR	chr7:100393925:C:T	chr7:100393925:C:T	T	C	rs7803454	0.122218	0.122218	4.8e-09	99914532	100638465	723.933	453	mQTL	chr7:99959594:T:C	rs6962405	ENSG00000200572	Y_RNA	cg11013060	Retina	4.66311e-08	0.000557	0.316755	0.0550155	0.016833	0.058086	SAME	0.899089	0.446135	chr7:99959594	FALSE	FALSE
AMD EUR	chr7:100393925:C:T	chr7:100393925:C:T	T	C	rs7803454	0.122218	0.122218	4.8e-09	99914532	100638465	723.933	453	mQTL	chr7:99959594:T:C	rs6962405	ENSG00000200579	Y_RNA	cg11013060	Retina	4.66311e-08	0.000557	0.316755	0.0550155	0.016833	0.058086	SAME	0.899089	0.446135	chr7:99959594	FALSE	FALSE
AMD EUR	chr7:100393925:C:T	chr7:100393925:C:T	T	C	rs7803454	0.122218	0.122218	4.8e-09	99914532	100638465	723.933	453	mQTL	chr7:99959594:T:C	rs6962405	ENSG00000200591	Y_RNA	cg11013060	Retina	4.66311e-08	0.000557	0.316755	0.0550155	0.016833	0.058086	SAME	0.899089	0.446135	chr7:99959594	FALSE	FALSE
AMD EUR	chr7:100393925:C:T	chr7:100393925:C:T	T	C	rs7803454	0.122218	0.122218	4.8e-09	99914532	100638465	723.933	453	mQTL	chr7:99959594:T:C	rs6962405	ENSG00000200600	Y_RNA	cg11013060	Retina	4.66311e-08	0.000557	0.316755	0.0550155	0.016833	0.058086	SAME	0.899089	0.446135	chr7:99959594	FALSE	FALSE
AMD EUR	chr7:100393925:C:T	chr7:100393925:C:T	T	C	rs7803454	0.122218	0.122218	4.8e-09	99914532	100638465	723.933	453	mQTL	chr7:99959594:T:C	rs6962405	ENSG00000200605	Y_RNA	cg11013060	Retina	4.66311e-08	0.000557	0.316755	0.0550155	0.016833	0.058086	SAME	0.899089	0.446135	chr7:99959594	FALSE	FALSE
AMD EUR	chr7:100393925:C:T	chr7:100393925:C:T	T	C	rs7803454	0.122218	0.122218	4.8e-09	99914532	100638465	723.933	453	mQTL	chr7:99959594:T:C	rs6962405	ENSG00000200610	Y_RNA	cg11013060	Retina	4.66311e-08	0.000557	0.316755	0.0550155	0.016833	0.058086	SAME	0.899089	0.446135	chr7:99959594	FALSE	FALSE
AMD EUR	chr7:100393925:C:T	chr7:100393925:C:T	T	C	rs7803454	0.122218	0.122218	4.8e-09	99914532	100638465	723.933	453	mQTL	chr7:99959594:T:C	rs6962405	ENSG00000200615	Y_RNA	cg11013060	Retina	4.66311e-08	0.000557	0.316755	0.0550155	0.016833	0.058086	SAME	0.899089	0.446135	chr7:99959594	FALSE	FALSE
AMD EUR	chr7:100393925:C:T	chr7:100393925:C:T	T	C	rs7803454	0.122218	0.122218	4.8e-09	99914532	100638465	723.933	453	mQTL	chr7:99959594:T:C	rs6962405	ENSG00000200616	Y_RNA	cg11013060	Retina	4.66311e-08	0.000557	0.316755	0.0550155	0.016833	0.058086	SAME	0.899089	0.446135	chr7:99959594	FALSE	FALSE
AMD EUR	chr7:100393925:C:T	chr7:100393925:C:T	T	C	rs7803454	0.122218	0.122218	4.8e-09	99914532	100638465	723.933	453	mQTL	chr7:99959594:T:C	rs6962405	ENSG00000200630	Y_RNA	cg11013060	Retina	4.66311e-08	0.000557	0.316755	0.0550155	0.016833	0.058086	SAME	0.899089	0.446135	chr7:99959594	FALSE	FALSE
AMD EUR	chr7:100393925:C:T	chr7:100393925:C:T	T	C	rs7803454	0.122218	0.122218	4.8e-09	99914532	100638465	723.933	453	mQTL	chr7:99959594:T:C	rs6962405	ENSG00000200635	Y_RNA	cg11013060	Retina	4.66311e-08	0.000557	0.316755	0.0550155	0.016833	0.058086	SAME	0.899089	0.446135	chr7:99959594	FALSE	FALSE
AMD EUR	chr7:100393925:C:T	chr7:100393925:C:T	T	C	rs7803454	0.122218	0.122218	4.8e-09	99914532	100638465	723.933	453	mQTL	chr7:99959594:T:C	rs6962405	ENSG00000200646	Y_RNA	cg11013060	Retina	4.66311e-08	0.000557	0.316755	0.0550155	0.016833	0.058086	SAME	0.899089	0.446135	chr7:99959594	FALSE	FALSE
AMD EUR	chr7:100393925:C:T	chr7:100393925:C:T	T	C	rs7803454	0.122218	0.122218	4.8e-09	99914532	100638465	723.933	453	mQTL	chr7:99959594:T:C	rs6962405	ENSG00000200651	Y_RNA	cg11013060	Retina	4.66311e-08	0.000557	0.316755	0.0550155	0.016833	0.058086	SAME	0.899089	0.446135	chr7:99959594	FALSE	FALSE
AMD EUR	chr7:100393925:C:T	chr7:100393925:C:T	T	C	rs7803454	0.122218	0.122218	4.8e-09	99914532	100638465	723.933	453	mQTL	chr7:99959594:T:C	rs6962405	ENSG00000200664	Y_RNA	cg11013060	Retina	4.66311e-08	0.000557	0.316755	0.0550155	0.016833	0.058086	SAME	0.899089	0.446135	chr7:99959594	FALSE	FALSE
AMD EUR	chr7:100393925:C:T	chr7:100393925:C:T	T	C	rs7803454	0.122218	0.122218	4.8e-09	99914532	100638465	723.933	453	mQTL	chr7:99959594:T:C	rs6962405	ENSG00000200685	Y_RNA	cg11013060	Retina	4.66311e-08	0.000557	0.316755	0.0550155	0.016833	0.058086	SAME	0.899089	0.446135	chr7:99959594	FALSE	FALSE
AMD EUR	chr7:100393925:C:T	chr7:100393925:C:T	T	C	rs7803454	0.122218	0.122218	4.8e-09	99914532	100638465	723.933	453	mQTL	chr7:99959594:T:C	rs6962405	ENSG00000200688	Y_RNA	cg11013060	Retina	4.66311e-08	0.000557	0.316755	0.0550155	0.016833	0.058086	SAME	0.899089	0.446135	chr7:99959594	FALSE	FALSE
AMD EUR	chr7:100393925:C:T	chr7:100393925:C:T	T	C	rs7803454	0.122218	0.122218	4.8e-09	99914532	100638465	723.933	453	mQTL	chr7:99959594:T:C	rs6962405	ENSG00000200702	Y_RNA	cg11013060	Retina	4.66311e-08	0.000557	0.316755	0.0550155	0.016833	0.058086	SAME	0.899089	0.446135	chr7:99959594	FALSE	FALSE
AMD EUR	chr7:100393925:C:T	chr7:100393925:C:T	T	C	rs7803454	0.122218	0.122218	4.8e-09	99914532	100638465	723.933	453	mQTL	chr7:99959594:T:C	rs6962405	ENSG00000200714	Y_RNA	cg11013060	Retina	4.66311e-08	0.000557	0.316755	0.0550155	0.016833	0.058086	SAME	0.899089	0.446135	chr7:99959594	FALSE	FALSE
AMD EUR	chr7:100393925:C:T	chr7:100393925:C:T	T	C	rs7803454	0.122218	0.122218	4.8e-09	99914532	100638465	723.933	453	mQTL	chr7:99959594:T:C	rs6962405	ENSG00000200737	Y_RNA	cg11013060	Retina	4.66311e-08	0.000557	0.316755	0.0550155	0.016833	0.058086	SAME	0.899089	0.446135	chr7:99959594	FALSE	FALSE
AMD EUR	chr7:100393925:C:T	chr7:100393925:C:T	T	C	rs7803454	0.122218	0.122218	4.8e-09	99914532	100638465	723.933	453	mQTL	chr7:99959594:T:C	rs6962405	ENSG00000200742	Y_RNA	cg11013060	Retina	4.66311e-08	0.000557	0.316755	0.0550155	0.016833	0.058086	SAME	0.899089	0.446135	chr7:99959594	FALSE	FALSE
AMD EUR	chr7:100393925:C:T	chr7:100393925:C:T	T	C	rs7803454	0.122218	0.122218	4.8e-09	99914532	100638465	723.933	453	mQTL	chr7:99959594:T:C	rs6962405	ENSG00000200750	Y_RNA	cg11013060	Retina	4.66311e-08	0.000557	0.316755	0.0550155	0.016833	0.058086	SAME	0.899089	0.446135	chr7:99959594	FALSE	FALSE
AMD EUR	chr7:100393925:C:T	chr7:100393925:C:T	T	C	rs7803454	0.122218	0.122218	4.8e-09	99914532	100638465	723.933	453	mQTL	chr7:99959594:T:C	rs6962405	ENSG00000200752	Y_RNA	cg11013060	Retina	4.66311e-08	0.000557	0.316755	0.0550155	0.016833	0.058086	SAME	0.899089	0.446135	chr7:99959594	FALSE	FALSE
AMD EUR	chr7:100393925:C:T	chr7:100393925:C:T	T	C	rs7803454	0.122218	0.122218	4.8e-09	99914532	100638465	723.933	453	mQTL	chr7:99959594:T:C	rs6962405	ENSG00000200754	Y_RNA	cg11013060	Retina	4.66311e-08	0.000557	0.316755	0.0550155	0.016833	0.058086	SAME	0.899089	0.446135	chr7:99959594	FALSE	FALSE
AMD EUR	chr7:100393925:C:T	chr7:100393925:C:T	T	C	rs7803454	0.122218	0.122218	4.8e-09	99914532	100638465	723.933	453	mQTL	chr7:99959594:T:C	rs6962405	ENSG00000200764	Y_RNA	cg11013060	Retina	4.66311e-08	0.000557	0.316755	0.0550155	0.016833	0.058086	SAME	0.899089	0.446135	chr7:99959594	FALSE	FALSE
AMD EUR	chr7:100393925:C:T	chr7:100393925:C:T	T	C	rs7803454	0.122218	0.122218	4.8e-09	99914532	100638465	723.933	453	mQTL	chr7:99959594:T:C	rs6962405	ENSG00000200769	Y_RNA	cg11013060	Retina	4.66311e-08	0.000557	0.316755	0.0550155	0.016833	0.058086	SAME	0.899089	0.446135	chr7:99959594	FALSE	FALSE
AMD EUR	chr7:100393925:C:T	chr7:100393925:C:T	T	C	rs7803454	0.122218	0.122218	4.8e-09	99914532	100638465	723.933	453	mQTL	chr7:99959594:T:C	rs6962405	ENSG00000200788	Y_RNA	cg11013060	Retina	4.66311e-08	0.000557	0.316755	0.0550155	0.016833	0.058086	SAME	0.899089	0.446135	chr7:99959594	FALSE	FALSE
AMD EUR	chr7:100393925:C:T	chr7:100393925:C:T	T	C	rs7803454	0.122218	0.122218	4.8e-09	99914532	100638465	723.933	453	mQTL	chr7:99959594:T:C	rs6962405	ENSG00000200822	Y_RNA	cg11013060	Retina	4.66311e-08	0.000557	0.316755	0.0550155	0.016833	0.058086	SAME	0.899089	0.446135	chr7:99959594	FALSE	FALSE
AMD EUR	chr7:100393925:C:T	chr7:100393925:C:T	T	C	rs7803454	0.122218	0.122218	4.8e-09	99914532	100638465	723.933	453	mQTL	chr7:99959594:T:C	rs6962405	ENSG00000200829	Y_RNA	cg11013060	Retina	4.66311e-08	0.000557	0.316755	0.0550155	0.016833	0.058086	SAME	0.899089	0.446135	chr7:99959594	FALSE	FALSE
AMD EUR	chr7:100393925:C:T	chr7:100393925:C:T	T	C	rs7803454	0.122218	0.122218	4.8e-09	99914532	100638465	723.933	453	mQTL	chr7:99959594:T:C	rs6962405	ENSG00000200834	Y_RNA	cg11013060	Retina	4.66311e-08	0.000557	0.316755	0.0550155	0.016833	0.058086	SAME	0.899089	0.446135	chr7:99959594	FALSE	FALSE
AMD EUR	chr7:100393925:C:T	chr7:100393925:C:T	T	C	rs7803454	0.122218	0.122218	4.8e-09	99914532	100638465	723.933	453	mQTL	chr7:99959594:T:C	rs6962405	ENSG00000200842	Y_RNA	cg11013060	Retina	4.66311e-08	0.000557	0.316755	0.0550155	0.016833	0.058086	SAME	0.899089	0.446135	chr7:99959594	FALSE	FALSE
AMD EUR	chr7:100393925:C:T	chr7:100393925:C:T	T	C	rs7803454	0.122218	0.122218	4.8e-09	99914532	100638465	723.933	453	mQTL	chr7:99959594:T:C	rs6962405	ENSG00000200847	Y_RNA	cg11013060	Retina	4.66311e-08	0.000557	0.316755	0.0550155	0.016833	0.058086	SAME	0.899089	0.446135	chr7:99959594	FALSE	FALSE
AMD EUR	chr7:100393925:C:T	chr7:100393925:C:T	T	C	rs7803454	0.122218	0.122218	4.8e-09	99914532	100638465	723.933	453	mQTL	chr7:99959594:T:C	rs6962405	ENSG00000200849	Y_RNA	cg11013060	Retina	4.66311e-08	0.000557	0.316755	0.0550155	0.016833	0.058086	SAME	0.899089	0.446135	chr7:99959594	FALSE	FALSE
AMD EUR	chr7:100393925:C:T	chr7:100393925:C:T	T	C	rs7803454	0.122218	0.122218	4.8e-09	99914532	100638465	723.933	453	mQTL	chr7:99959594:T:C	rs6962405	ENSG00000200855	Y_RNA	cg11013060	Retina	4.66311e-08	0.000557	0.316755	0.0550155	0.016833	0.058086	SAME	0.899089	0.446135	chr7:99959594	FALSE	FALSE
AMD EUR	chr7:100393925:C:T	chr7:100393925:C:T	T	C	rs7803454	0.122218	0.122218	4.8e-09	99914532	100638465	723.933	453	mQTL	chr7:99959594:T:C	rs6962405	ENSG00000200857	Y_RNA	cg11013060	Retina	4.66311e-08	0.000557	0.316755	0.0550155	0.016833	0.058086	SAME	0.899089	0.446135	chr7:99959594	FALSE	FALSE
AMD EUR	chr7:100393925:C:T	chr7:100393925:C:T	T	C	rs7803454	0.122218	0.122218	4.8e-09	99914532	100638465	723.933	453	mQTL	chr7:99959594:T:C	rs6962405	ENSG00000200860	Y_RNA	cg11013060	Retina	4.66311e-08	0.000557	0.316755	0.0550155	0.016833	0.058086	SAME	0.899089	0.446135	chr7:99959594	FALSE	FALSE
AMD EUR	chr7:100393925:C:T	chr7:100393925:C:T	T	C	rs7803454	0.122218	0.122218	4.8e-09	99914532	100638465	723.933	453	mQTL	chr7:99959594:T:C	rs6962405	ENSG00000200874	Y_RNA	cg11013060	Retina	4.66311e-08	0.000557	0.316755	0.0550155	0.016833	0.058086	SAME	0.899089	0.446135	chr7:99959594	FALSE	FALSE
AMD EUR	chr7:100393925:C:T	chr7:100393925:C:T	T	C	rs7803454	0.122218	0.122218	4.8e-09	99914532	100638465	723.933	453	mQTL	chr7:99959594:T:C	rs6962405	ENSG00000200883	Y_RNA	cg11013060	Retina	4.66311e-08	0.000557	0.316755	0.0550155	0.016833	0.058086	SAME	0.899089	0.446135	chr7:99959594	FALSE	FALSE
AMD EUR	chr7:100393925:C:T	chr7:100393925:C:T	T	C	rs7803454	0.122218	0.122218	4.8e-09	99914532	100638465	723.933	453	mQTL	chr7:99959594:T:C	rs6962405	ENSG00000200884	Y_RNA	cg11013060	Retina	4.66311e-08	0.000557	0.316755	0.0550155	0.016833	0.058086	SAME	0.899089	0.446135	chr7:99959594	FALSE	FALSE
AMD EUR	chr7:100393925:C:T	chr7:100393925:C:T	T	C	rs7803454	0.122218	0.122218	4.8e-09	99914532	100638465	723.933	453	mQTL	chr7:99959594:T:C	rs6962405	ENSG00000200888	Y_RNA	cg11013060	Retina	4.66311e-08	0.000557	0.316755	0.0550155	0.016833	0.058086	SAME	0.899089	0.446135	chr7:99959594	FALSE	FALSE
AMD EUR	chr7:100393925:C:T	chr7:100393925:C:T	T	C	rs7803454	0.122218	0.122218	4.8e-09	99914532	100638465	723.933	453	mQTL	chr7:99959594:T:C	rs6962405	ENSG00000200922	Y_RNA	cg11013060	Retina	4.66311e-08	0.000557	0.316755	0.0550155	0.016833	0.058086	SAME	0.899089	0.446135	chr7:99959594	FALSE	FALSE
AMD EUR	chr7:100393925:C:T	chr7:100393925:C:T	T	C	rs7803454	0.122218	0.122218	4.8e-09	99914532	100638465	723.933	453	mQTL	chr7:99959594:T:C	rs6962405	ENSG00000200953	Y_RNA	cg11013060	Retina	4.66311e-08	0.000557	0.316755	0.0550155	0.016833	0.058086	SAME	0.899089	0.446135	chr7:99959594	FALSE	FALSE
AMD EUR	chr7:100393925:C:T	chr7:100393925:C:T	T	C	rs7803454	0.122218	0.122218	4.8e-09	99914532	100638465	723.933	453	mQTL	chr7:99959594:T:C	rs6962405	ENSG00000200976	Y_RNA	cg11013060	Retina	4.66311e-08	0.000557	0.316755	0.0550155	0.016833	0.058086	SAME	0.899089	0.446135	chr7:99959594	FALSE	FALSE
AMD EUR	chr7:100393925:C:T	chr7:100393925:C:T	T	C	rs7803454	0.122218	0.122218	4.8e-09	99914532	100638465	723.933	453	mQTL	chr7:99959594:T:C	rs6962405	ENSG00000200982	Y_RNA	cg11013060	Retina	4.66311e-08	0.000557	0.316755	0.0550155	0.016833	0.058086	SAME	0.899089	0.446135	chr7:99959594	FALSE	FALSE
AMD EUR	chr7:100393925:C:T	chr7:100393925:C:T	T	C	rs7803454	0.122218	0.122218	4.8e-09	99914532	100638465	723.933	453	mQTL	chr7:99959594:T:C	rs6962405	ENSG00000200998	Y_RNA	cg11013060	Retina	4.66311e-08	0.000557	0.316755	0.0550155	0.016833	0.058086	SAME	0.899089	0.446135	chr7:99959594	FALSE	FALSE
AMD EUR	chr7:100393925:C:T	chr7:100393925:C:T	T	C	rs7803454	0.122218	0.122218	4.8e-09	99914532	100638465	723.933	453	mQTL	chr7:99959594:T:C	rs6962405	ENSG00000201006	Y_RNA	cg11013060	Retina	4.66311e-08	0.000557	0.316755	0.0550155	0.016833	0.058086	SAME	0.899089	0.446135	chr7:99959594	FALSE	FALSE
AMD EUR	chr7:100393925:C:T	chr7:100393925:C:T	T	C	rs7803454	0.122218	0.122218	4.8e-09	99914532	100638465	723.933	453	mQTL	chr7:99959594:T:C	rs6962405	ENSG00000201012	Y_RNA	cg11013060	Retina	4.66311e-08	0.000557	0.316755	0.0550155	0.016833	0.058086	SAME	0.899089	0.446135	chr7:99959594	FALSE	FALSE
AMD EUR	chr7:100393925:C:T	chr7:100393925:C:T	T	C	rs7803454	0.122218	0.122218	4.8e-09	99914532	100638465	723.933	453	mQTL	chr7:99959594:T:C	rs6962405	ENSG00000201013	Y_RNA	cg11013060	Retina	4.66311e-08	0.000557	0.316755	0.0550155	0.016833	0.058086	SAME	0.899089	0.446135	chr7:99959594	FALSE	FALSE
AMD EUR	chr7:100393925:C:T	chr7:100393925:C:T	T	C	rs7803454	0.122218	0.122218	4.8e-09	99914532	100638465	723.933	453	mQTL	chr7:99959594:T:C	rs6962405	ENSG00000201026	Y_RNA	cg11013060	Retina	4.66311e-08	0.000557	0.316755	0.0550155	0.016833	0.058086	SAME	0.899089	0.446135	chr7:99959594	FALSE	FALSE
AMD EUR	chr7:100393925:C:T	chr7:100393925:C:T	T	C	rs7803454	0.122218	0.122218	4.8e-09	99914532	100638465	723.933	453	mQTL	chr7:99959594:T:C	rs6962405	ENSG00000201031	Y_RNA	cg11013060	Retina	4.66311e-08	0.000557	0.316755	0.0550155	0.016833	0.058086	SAME	0.899089	0.446135	chr7:99959594	FALSE	FALSE
AMD EUR	chr7:100393925:C:T	chr7:100393925:C:T	T	C	rs7803454	0.122218	0.122218	4.8e-09	99914532	100638465	723.933	453	mQTL	chr7:99959594:T:C	rs6962405	ENSG00000201034	Y_RNA	cg11013060	Retina	4.66311e-08	0.000557	0.316755	0.0550155	0.016833	0.058086	SAME	0.899089	0.446135	chr7:99959594	FALSE	FALSE
AMD EUR	chr7:100393925:C:T	chr7:100393925:C:T	T	C	rs7803454	0.122218	0.122218	4.8e-09	99914532	100638465	723.933	453	mQTL	chr7:99959594:T:C	rs6962405	ENSG00000201047	Y_RNA	cg11013060	Retina	4.66311e-08	0.000557	0.316755	0.0550155	0.016833	0.058086	SAME	0.899089	0.446135	chr7:99959594	FALSE	FALSE
AMD EUR	chr7:100393925:C:T	chr7:100393925:C:T	T	C	rs7803454	0.122218	0.122218	4.8e-09	99914532	100638465	723.933	453	mQTL	chr7:99959594:T:C	rs6962405	ENSG00000201048	Y_RNA	cg11013060	Retina	4.66311e-08	0.000557	0.316755	0.0550155	0.016833	0.058086	SAME	0.899089	0.446135	chr7:99959594	FALSE	FALSE
AMD EUR	chr7:100393925:C:T	chr7:100393925:C:T	T	C	rs7803454	0.122218	0.122218	4.8e-09	99914532	100638465	723.933	453	mQTL	chr7:99959594:T:C	rs6962405	ENSG00000201071	Y_RNA	cg11013060	Retina	4.66311e-08	0.000557	0.316755	0.0550155	0.016833	0.058086	SAME	0.899089	0.446135	chr7:99959594	FALSE	FALSE
AMD EUR	chr7:100393925:C:T	chr7:100393925:C:T	T	C	rs7803454	0.122218	0.122218	4.8e-09	99914532	100638465	723.933	453	mQTL	chr7:99959594:T:C	rs6962405	ENSG00000201074	Y_RNA	cg11013060	Retina	4.66311e-08	0.000557	0.316755	0.0550155	0.016833	0.058086	SAME	0.899089	0.446135	chr7:99959594	FALSE	FALSE
AMD EUR	chr7:100393925:C:T	chr7:100393925:C:T	T	C	rs7803454	0.122218	0.122218	4.8e-09	99914532	100638465	723.933	453	mQTL	chr7:99959594:T:C	rs6962405	ENSG00000201075	Y_RNA	cg11013060	Retina	4.66311e-08	0.000557	0.316755	0.0550155	0.016833	0.058086	SAME	0.899089	0.446135	chr7:99959594	FALSE	FALSE
AMD EUR	chr7:100393925:C:T	chr7:100393925:C:T	T	C	rs7803454	0.122218	0.122218	4.8e-09	99914532	100638465	723.933	453	mQTL	chr7:99959594:T:C	rs6962405	ENSG00000201084	Y_RNA	cg11013060	Retina	4.66311e-08	0.000557	0.316755	0.0550155	0.016833	0.058086	SAME	0.899089	0.446135	chr7:99959594	FALSE	FALSE
AMD EUR	chr7:100393925:C:T	chr7:100393925:C:T	T	C	rs7803454	0.122218	0.122218	4.8e-09	99914532	100638465	723.933	453	mQTL	chr7:99959594:T:C	rs6962405	ENSG00000201088	Y_RNA	cg11013060	Retina	4.66311e-08	0.000557	0.316755	0.0550155	0.016833	0.058086	SAME	0.899089	0.446135	chr7:99959594	FALSE	FALSE
AMD EUR	chr7:100393925:C:T	chr7:100393925:C:T	T	C	rs7803454	0.122218	0.122218	4.8e-09	99914532	100638465	723.933	453	mQTL	chr7:99959594:T:C	rs6962405	ENSG00000201102	Y_RNA	cg11013060	Retina	4.66311e-08	0.000557	0.316755	0.0550155	0.016833	0.058086	SAME	0.899089	0.446135	chr7:99959594	FALSE	FALSE
AMD EUR	chr7:100393925:C:T	chr7:100393925:C:T	T	C	rs7803454	0.122218	0.122218	4.8e-09	99914532	100638465	723.933	453	mQTL	chr7:99959594:T:C	rs6962405	ENSG00000201114	Y_RNA	cg11013060	Retina	4.66311e-08	0.000557	0.316755	0.0550155	0.016833	0.058086	SAME	0.899089	0.446135	chr7:99959594	FALSE	FALSE
AMD EUR	chr7:100393925:C:T	chr7:100393925:C:T	T	C	rs7803454	0.122218	0.122218	4.8e-09	99914532	100638465	723.933	453	mQTL	chr7:99959594:T:C	rs6962405	ENSG00000201118	Y_RNA	cg11013060	Retina	4.66311e-08	0.000557	0.316755	0.0550155	0.016833	0.058086	SAME	0.899089	0.446135	chr7:99959594	FALSE	FALSE
AMD EUR	chr7:100393925:C:T	chr7:100393925:C:T	T	C	rs7803454	0.122218	0.122218	4.8e-09	99914532	100638465	723.933	453	mQTL	chr7:99959594:T:C	rs6962405	ENSG00000201134	Y_RNA	cg11013060	Retina	4.66311e-08	0.000557	0.316755	0.0550155	0.016833	0.058086	SAME	0.899089	0.446135	chr7:99959594	FALSE	FALSE
AMD EUR	chr7:100393925:C:T	chr7:100393925:C:T	T	C	rs7803454	0.122218	0.122218	4.8e-09	99914532	100638465	723.933	453	mQTL	chr7:99959594:T:C	rs6962405	ENSG00000201160	Y_RNA	cg11013060	Retina	4.66311e-08	0.000557	0.316755	0.0550155	0.016833	0.058086	SAME	0.899089	0.446135	chr7:99959594	FALSE	FALSE
AMD EUR	chr7:100393925:C:T	chr7:100393925:C:T	T	C	rs7803454	0.122218	0.122218	4.8e-09	99914532	100638465	723.933	453	mQTL	chr7:99959594:T:C	rs6962405	ENSG00000201178	Y_RNA	cg11013060	Retina	4.66311e-08	0.000557	0.316755	0.0550155	0.016833	0.058086	SAME	0.899089	0.446135	chr7:99959594	FALSE	FALSE
AMD EUR	chr7:100393925:C:T	chr7:100393925:C:T	T	C	rs7803454	0.122218	0.122218	4.8e-09	99914532	100638465	723.933	453	mQTL	chr7:99959594:T:C	rs6962405	ENSG00000201196	Y_RNA	cg11013060	Retina	4.66311e-08	0.000557	0.316755	0.0550155	0.016833	0.058086	SAME	0.899089	0.446135	chr7:99959594	FALSE	FALSE
AMD EUR	chr7:100393925:C:T	chr7:100393925:C:T	T	C	rs7803454	0.122218	0.122218	4.8e-09	99914532	100638465	723.933	453	mQTL	chr7:99959594:T:C	rs6962405	ENSG00000201207	Y_RNA	cg11013060	Retina	4.66311e-08	0.000557	0.316755	0.0550155	0.016833	0.058086	SAME	0.899089	0.446135	chr7:99959594	FALSE	FALSE
AMD EUR	chr7:100393925:C:T	chr7:100393925:C:T	T	C	rs7803454	0.122218	0.122218	4.8e-09	99914532	100638465	723.933	453	mQTL	chr7:99959594:T:C	rs6962405	ENSG00000201208	Y_RNA	cg11013060	Retina	4.66311e-08	0.000557	0.316755	0.0550155	0.016833	0.058086	SAME	0.899089	0.446135	chr7:99959594	FALSE	FALSE
AMD EUR	chr7:100393925:C:T	chr7:100393925:C:T	T	C	rs7803454	0.122218	0.122218	4.8e-09	99914532	100638465	723.933	453	mQTL	chr7:99959594:T:C	rs6962405	ENSG00000201216	Y_RNA	cg11013060	Retina	4.66311e-08	0.000557	0.316755	0.0550155	0.016833	0.058086	SAME	0.899089	0.446135	chr7:99959594	FALSE	FALSE
AMD EUR	chr7:100393925:C:T	chr7:100393925:C:T	T	C	rs7803454	0.122218	0.122218	4.8e-09	99914532	100638465	723.933	453	mQTL	chr7:99959594:T:C	rs6962405	ENSG00000201217	Y_RNA	cg11013060	Retina	4.66311e-08	0.000557	0.316755	0.0550155	0.016833	0.058086	SAME	0.899089	0.446135	chr7:99959594	FALSE	FALSE
AMD EUR	chr7:100393925:C:T	chr7:100393925:C:T	T	C	rs7803454	0.122218	0.122218	4.8e-09	99914532	100638465	723.933	453	mQTL	chr7:99959594:T:C	rs6962405	ENSG00000201218	Y_RNA	cg11013060	Retina	4.66311e-08	0.000557	0.316755	0.0550155	0.016833	0.058086	SAME	0.899089	0.446135	chr7:99959594	FALSE	FALSE
AMD EUR	chr7:100393925:C:T	chr7:100393925:C:T	T	C	rs7803454	0.122218	0.122218	4.8e-09	99914532	100638465	723.933	453	mQTL	chr7:99959594:T:C	rs6962405	ENSG00000201228	Y_RNA	cg11013060	Retina	4.66311e-08	0.000557	0.316755	0.0550155	0.016833	0.058086	SAME	0.899089	0.446135	chr7:99959594	FALSE	FALSE
AMD EUR	chr7:100393925:C:T	chr7:100393925:C:T	T	C	rs7803454	0.122218	0.122218	4.8e-09	99914532	100638465	723.933	453	mQTL	chr7:99959594:T:C	rs6962405	ENSG00000201239	Y_RNA	cg11013060	Retina	4.66311e-08	0.000557	0.316755	0.0550155	0.016833	0.058086	SAME	0.899089	0.446135	chr7:99959594	FALSE	FALSE
AMD EUR	chr7:100393925:C:T	chr7:100393925:C:T	T	C	rs7803454	0.122218	0.122218	4.8e-09	99914532	100638465	723.933	453	mQTL	chr7:99959594:T:C	rs6962405	ENSG00000201277	Y_RNA	cg11013060	Retina	4.66311e-08	0.000557	0.316755	0.0550155	0.016833	0.058086	SAME	0.899089	0.446135	chr7:99959594	FALSE	FALSE
AMD EUR	chr7:100393925:C:T	chr7:100393925:C:T	T	C	rs7803454	0.122218	0.122218	4.8e-09	99914532	100638465	723.933	453	mQTL	chr7:99959594:T:C	rs6962405	ENSG00000201279	Y_RNA	cg11013060	Retina	4.66311e-08	0.000557	0.316755	0.0550155	0.016833	0.058086	SAME	0.899089	0.446135	chr7:99959594	FALSE	FALSE
AMD EUR	chr7:100393925:C:T	chr7:100393925:C:T	T	C	rs7803454	0.122218	0.122218	4.8e-09	99914532	100638465	723.933	453	mQTL	chr7:99959594:T:C	rs6962405	ENSG00000201282	Y_RNA	cg11013060	Retina	4.66311e-08	0.000557	0.316755	0.0550155	0.016833	0.058086	SAME	0.899089	0.446135	chr7:99959594	FALSE	FALSE
AMD EUR	chr7:100393925:C:T	chr7:100393925:C:T	T	C	rs7803454	0.122218	0.122218	4.8e-09	99914532	100638465	723.933	453	mQTL	chr7:99959594:T:C	rs6962405	ENSG00000201297	Y_RNA	cg11013060	Retina	4.66311e-08	0.000557	0.316755	0.0550155	0.016833	0.058086	SAME	0.899089	0.446135	chr7:99959594	FALSE	FALSE
AMD EUR	chr7:100393925:C:T	chr7:100393925:C:T	T	C	rs7803454	0.122218	0.122218	4.8e-09	99914532	100638465	723.933	453	mQTL	chr7:99959594:T:C	rs6962405	ENSG00000201309	Y_RNA	cg11013060	Retina	4.66311e-08	0.000557	0.316755	0.0550155	0.016833	0.058086	SAME	0.899089	0.446135	chr7:99959594	FALSE	FALSE
AMD EUR	chr7:100393925:C:T	chr7:100393925:C:T	T	C	rs7803454	0.122218	0.122218	4.8e-09	99914532	100638465	723.933	453	mQTL	chr7:99959594:T:C	rs6962405	ENSG00000201311	Y_RNA	cg11013060	Retina	4.66311e-08	0.000557	0.316755	0.0550155	0.016833	0.058086	SAME	0.899089	0.446135	chr7:99959594	FALSE	FALSE
AMD EUR	chr7:100393925:C:T	chr7:100393925:C:T	T	C	rs7803454	0.122218	0.122218	4.8e-09	99914532	100638465	723.933	453	mQTL	chr7:99959594:T:C	rs6962405	ENSG00000201314	Y_RNA	cg11013060	Retina	4.66311e-08	0.000557	0.316755	0.0550155	0.016833	0.058086	SAME	0.899089	0.446135	chr7:99959594	FALSE	FALSE
AMD EUR	chr7:100393925:C:T	chr7:100393925:C:T	T	C	rs7803454	0.122218	0.122218	4.8e-09	99914532	100638465	723.933	453	mQTL	chr7:99959594:T:C	rs6962405	ENSG00000201339	Y_RNA	cg11013060	Retina	4.66311e-08	0.000557	0.316755	0.0550155	0.016833	0.058086	SAME	0.899089	0.446135	chr7:99959594	FALSE	FALSE
AMD EUR	chr7:100393925:C:T	chr7:100393925:C:T	T	C	rs7803454	0.122218	0.122218	4.8e-09	99914532	100638465	723.933	453	mQTL	chr7:99959594:T:C	rs6962405	ENSG00000201340	Y_RNA	cg11013060	Retina	4.66311e-08	0.000557	0.316755	0.0550155	0.016833	0.058086	SAME	0.899089	0.446135	chr7:99959594	FALSE	FALSE
AMD EUR	chr7:100393925:C:T	chr7:100393925:C:T	T	C	rs7803454	0.122218	0.122218	4.8e-09	99914532	100638465	723.933	453	mQTL	chr7:99959594:T:C	rs6962405	ENSG00000201343	Y_RNA	cg11013060	Retina	4.66311e-08	0.000557	0.316755	0.0550155	0.016833	0.058086	SAME	0.899089	0.446135	chr7:99959594	FALSE	FALSE
AMD EUR	chr7:100393925:C:T	chr7:100393925:C:T	T	C	rs7803454	0.122218	0.122218	4.8e-09	99914532	100638465	723.933	453	mQTL	chr7:99959594:T:C	rs6962405	ENSG00000201351	Y_RNA	cg11013060	Retina	4.66311e-08	0.000557	0.316755	0.0550155	0.016833	0.058086	SAME	0.899089	0.446135	chr7:99959594	FALSE	FALSE
AMD EUR	chr7:100393925:C:T	chr7:100393925:C:T	T	C	rs7803454	0.122218	0.122218	4.8e-09	99914532	100638465	723.933	453	mQTL	chr7:99959594:T:C	rs6962405	ENSG00000201354	Y_RNA	cg11013060	Retina	4.66311e-08	0.000557	0.316755	0.0550155	0.016833	0.058086	SAME	0.899089	0.446135	chr7:99959594	FALSE	FALSE
AMD EUR	chr7:100393925:C:T	chr7:100393925:C:T	T	C	rs7803454	0.122218	0.122218	4.8e-09	99914532	100638465	723.933	453	mQTL	chr7:99959594:T:C	rs6962405	ENSG00000201363	Y_RNA	cg11013060	Retina	4.66311e-08	0.000557	0.316755	0.0550155	0.016833	0.058086	SAME	0.899089	0.446135	chr7:99959594	FALSE	FALSE
AMD EUR	chr7:100393925:C:T	chr7:100393925:C:T	T	C	rs7803454	0.122218	0.122218	4.8e-09	99914532	100638465	723.933	453	mQTL	chr7:99959594:T:C	rs6962405	ENSG00000201365	Y_RNA	cg11013060	Retina	4.66311e-08	0.000557	0.316755	0.0550155	0.016833	0.058086	SAME	0.899089	0.446135	chr7:99959594	FALSE	FALSE
AMD EUR	chr7:100393925:C:T	chr7:100393925:C:T	T	C	rs7803454	0.122218	0.122218	4.8e-09	99914532	100638465	723.933	453	mQTL	chr7:99959594:T:C	rs6962405	ENSG00000201370	Y_RNA	cg11013060	Retina	4.66311e-08	0.000557	0.316755	0.0550155	0.016833	0.058086	SAME	0.899089	0.446135	chr7:99959594	FALSE	FALSE
AMD EUR	chr7:100393925:C:T	chr7:100393925:C:T	T	C	rs7803454	0.122218	0.122218	4.8e-09	99914532	100638465	723.933	453	mQTL	chr7:99959594:T:C	rs6962405	ENSG00000201371	Y_RNA	cg11013060	Retina	4.66311e-08	0.000557	0.316755	0.0550155	0.016833	0.058086	SAME	0.899089	0.446135	chr7:99959594	FALSE	FALSE
AMD EUR	chr7:100393925:C:T	chr7:100393925:C:T	T	C	rs7803454	0.122218	0.122218	4.8e-09	99914532	100638465	723.933	453	mQTL	chr7:99959594:T:C	rs6962405	ENSG00000201405	Y_RNA	cg11013060	Retina	4.66311e-08	0.000557	0.316755	0.0550155	0.016833	0.058086	SAME	0.899089	0.446135	chr7:99959594	FALSE	FALSE
AMD EUR	chr7:100393925:C:T	chr7:100393925:C:T	T	C	rs7803454	0.122218	0.122218	4.8e-09	99914532	100638465	723.933	453	mQTL	chr7:99959594:T:C	rs6962405	ENSG00000201412	Y_RNA	cg11013060	Retina	4.66311e-08	0.000557	0.316755	0.0550155	0.016833	0.058086	SAME	0.899089	0.446135	chr7:99959594	FALSE	FALSE
AMD EUR	chr7:100393925:C:T	chr7:100393925:C:T	T	C	rs7803454	0.122218	0.122218	4.8e-09	99914532	100638465	723.933	453	mQTL	chr7:99959594:T:C	rs6962405	ENSG00000201421	Y_RNA	cg11013060	Retina	4.66311e-08	0.000557	0.316755	0.0550155	0.016833	0.058086	SAME	0.899089	0.446135	chr7:99959594	FALSE	FALSE
AMD EUR	chr7:100393925:C:T	chr7:100393925:C:T	T	C	rs7803454	0.122218	0.122218	4.8e-09	99914532	100638465	723.933	453	mQTL	chr7:99959594:T:C	rs6962405	ENSG00000201426	Y_RNA	cg11013060	Retina	4.66311e-08	0.000557	0.316755	0.0550155	0.016833	0.058086	SAME	0.899089	0.446135	chr7:99959594	FALSE	FALSE
AMD EUR	chr7:100393925:C:T	chr7:100393925:C:T	T	C	rs7803454	0.122218	0.122218	4.8e-09	99914532	100638465	723.933	453	mQTL	chr7:99959594:T:C	rs6962405	ENSG00000201432	Y_RNA	cg11013060	Retina	4.66311e-08	0.000557	0.316755	0.0550155	0.016833	0.058086	SAME	0.899089	0.446135	chr7:99959594	FALSE	FALSE
AMD EUR	chr7:100393925:C:T	chr7:100393925:C:T	T	C	rs7803454	0.122218	0.122218	4.8e-09	99914532	100638465	723.933	453	mQTL	chr7:99959594:T:C	rs6962405	ENSG00000201442	Y_RNA	cg11013060	Retina	4.66311e-08	0.000557	0.316755	0.0550155	0.016833	0.058086	SAME	0.899089	0.446135	chr7:99959594	FALSE	FALSE
AMD EUR	chr7:100393925:C:T	chr7:100393925:C:T	T	C	rs7803454	0.122218	0.122218	4.8e-09	99914532	100638465	723.933	453	mQTL	chr7:99959594:T:C	rs6962405	ENSG00000201451	Y_RNA	cg11013060	Retina	4.66311e-08	0.000557	0.316755	0.0550155	0.016833	0.058086	SAME	0.899089	0.446135	chr7:99959594	FALSE	FALSE
AMD EUR	chr7:100393925:C:T	chr7:100393925:C:T	T	C	rs7803454	0.122218	0.122218	4.8e-09	99914532	100638465	723.933	453	mQTL	chr7:99959594:T:C	rs6962405	ENSG00000201464	Y_RNA	cg11013060	Retina	4.66311e-08	0.000557	0.316755	0.0550155	0.016833	0.058086	SAME	0.899089	0.446135	chr7:99959594	FALSE	FALSE
AMD EUR	chr7:100393925:C:T	chr7:100393925:C:T	T	C	rs7803454	0.122218	0.122218	4.8e-09	99914532	100638465	723.933	453	mQTL	chr7:99959594:T:C	rs6962405	ENSG00000201466	Y_RNA	cg11013060	Retina	4.66311e-08	0.000557	0.316755	0.0550155	0.016833	0.058086	SAME	0.899089	0.446135	chr7:99959594	FALSE	FALSE
AMD EUR	chr7:100393925:C:T	chr7:100393925:C:T	T	C	rs7803454	0.122218	0.122218	4.8e-09	99914532	100638465	723.933	453	mQTL	chr7:99959594:T:C	rs6962405	ENSG00000201483	Y_RNA	cg11013060	Retina	4.66311e-08	0.000557	0.316755	0.0550155	0.016833	0.058086	SAME	0.899089	0.446135	chr7:99959594	FALSE	FALSE
AMD EUR	chr7:100393925:C:T	chr7:100393925:C:T	T	C	rs7803454	0.122218	0.122218	4.8e-09	99914532	100638465	723.933	453	mQTL	chr7:99959594:T:C	rs6962405	ENSG00000201489	Y_RNA	cg11013060	Retina	4.66311e-08	0.000557	0.316755	0.0550155	0.016833	0.058086	SAME	0.899089	0.446135	chr7:99959594	FALSE	FALSE
AMD EUR	chr7:100393925:C:T	chr7:100393925:C:T	T	C	rs7803454	0.122218	0.122218	4.8e-09	99914532	100638465	723.933	453	mQTL	chr7:99959594:T:C	rs6962405	ENSG00000201498	Y_RNA	cg11013060	Retina	4.66311e-08	0.000557	0.316755	0.0550155	0.016833	0.058086	SAME	0.899089	0.446135	chr7:99959594	FALSE	FALSE
AMD EUR	chr7:100393925:C:T	chr7:100393925:C:T	T	C	rs7803454	0.122218	0.122218	4.8e-09	99914532	100638465	723.933	453	mQTL	chr7:99959594:T:C	rs6962405	ENSG00000201501	Y_RNA	cg11013060	Retina	4.66311e-08	0.000557	0.316755	0.0550155	0.016833	0.058086	SAME	0.899089	0.446135	chr7:99959594	FALSE	FALSE
AMD EUR	chr7:100393925:C:T	chr7:100393925:C:T	T	C	rs7803454	0.122218	0.122218	4.8e-09	99914532	100638465	723.933	453	mQTL	chr7:99959594:T:C	rs6962405	ENSG00000201511	Y_RNA	cg11013060	Retina	4.66311e-08	0.000557	0.316755	0.0550155	0.016833	0.058086	SAME	0.899089	0.446135	chr7:99959594	FALSE	FALSE
AMD EUR	chr7:100393925:C:T	chr7:100393925:C:T	T	C	rs7803454	0.122218	0.122218	4.8e-09	99914532	100638465	723.933	453	mQTL	chr7:99959594:T:C	rs6962405	ENSG00000201529	Y_RNA	cg11013060	Retina	4.66311e-08	0.000557	0.316755	0.0550155	0.016833	0.058086	SAME	0.899089	0.446135	chr7:99959594	FALSE	FALSE
AMD EUR	chr7:100393925:C:T	chr7:100393925:C:T	T	C	rs7803454	0.122218	0.122218	4.8e-09	99914532	100638465	723.933	453	mQTL	chr7:99959594:T:C	rs6962405	ENSG00000201535	Y_RNA	cg11013060	Retina	4.66311e-08	0.000557	0.316755	0.0550155	0.016833	0.058086	SAME	0.899089	0.446135	chr7:99959594	FALSE	FALSE
AMD EUR	chr7:100393925:C:T	chr7:100393925:C:T	T	C	rs7803454	0.122218	0.122218	4.8e-09	99914532	100638465	723.933	453	mQTL	chr7:99959594:T:C	rs6962405	ENSG00000201547	Y_RNA	cg11013060	Retina	4.66311e-08	0.000557	0.316755	0.0550155	0.016833	0.058086	SAME	0.899089	0.446135	chr7:99959594	FALSE	FALSE
AMD EUR	chr7:100393925:C:T	chr7:100393925:C:T	T	C	rs7803454	0.122218	0.122218	4.8e-09	99914532	100638465	723.933	453	mQTL	chr7:99959594:T:C	rs6962405	ENSG00000201548	Y_RNA	cg11013060	Retina	4.66311e-08	0.000557	0.316755	0.0550155	0.016833	0.058086	SAME	0.899089	0.446135	chr7:99959594	FALSE	FALSE
AMD EUR	chr7:100393925:C:T	chr7:100393925:C:T	T	C	rs7803454	0.122218	0.122218	4.8e-09	99914532	100638465	723.933	453	mQTL	chr7:99959594:T:C	rs6962405	ENSG00000201549	Y_RNA	cg11013060	Retina	4.66311e-08	0.000557	0.316755	0.0550155	0.016833	0.058086	SAME	0.899089	0.446135	chr7:99959594	FALSE	FALSE
AMD EUR	chr7:100393925:C:T	chr7:100393925:C:T	T	C	rs7803454	0.122218	0.122218	4.8e-09	99914532	100638465	723.933	453	mQTL	chr7:99959594:T:C	rs6962405	ENSG00000201554	Y_RNA	cg11013060	Retina	4.66311e-08	0.000557	0.316755	0.0550155	0.016833	0.058086	SAME	0.899089	0.446135	chr7:99959594	FALSE	FALSE
AMD EUR	chr7:100393925:C:T	chr7:100393925:C:T	T	C	rs7803454	0.122218	0.122218	4.8e-09	99914532	100638465	723.933	453	mQTL	chr7:99959594:T:C	rs6962405	ENSG00000201555	Y_RNA	cg11013060	Retina	4.66311e-08	0.000557	0.316755	0.0550155	0.016833	0.058086	SAME	0.899089	0.446135	chr7:99959594	FALSE	FALSE
AMD EUR	chr7:100393925:C:T	chr7:100393925:C:T	T	C	rs7803454	0.122218	0.122218	4.8e-09	99914532	100638465	723.933	453	mQTL	chr7:99959594:T:C	rs6962405	ENSG00000201563	Y_RNA	cg11013060	Retina	4.66311e-08	0.000557	0.316755	0.0550155	0.016833	0.058086	SAME	0.899089	0.446135	chr7:99959594	FALSE	FALSE
AMD EUR	chr7:100393925:C:T	chr7:100393925:C:T	T	C	rs7803454	0.122218	0.122218	4.8e-09	99914532	100638465	723.933	453	mQTL	chr7:99959594:T:C	rs6962405	ENSG00000201565	Y_RNA	cg11013060	Retina	4.66311e-08	0.000557	0.316755	0.0550155	0.016833	0.058086	SAME	0.899089	0.446135	chr7:99959594	FALSE	FALSE
AMD EUR	chr7:100393925:C:T	chr7:100393925:C:T	T	C	rs7803454	0.122218	0.122218	4.8e-09	99914532	100638465	723.933	453	mQTL	chr7:99959594:T:C	rs6962405	ENSG00000201566	Y_RNA	cg11013060	Retina	4.66311e-08	0.000557	0.316755	0.0550155	0.016833	0.058086	SAME	0.899089	0.446135	chr7:99959594	FALSE	FALSE
AMD EUR	chr7:100393925:C:T	chr7:100393925:C:T	T	C	rs7803454	0.122218	0.122218	4.8e-09	99914532	100638465	723.933	453	mQTL	chr7:99959594:T:C	rs6962405	ENSG00000201573	Y_RNA	cg11013060	Retina	4.66311e-08	0.000557	0.316755	0.0550155	0.016833	0.058086	SAME	0.899089	0.446135	chr7:99959594	FALSE	FALSE
AMD EUR	chr7:100393925:C:T	chr7:100393925:C:T	T	C	rs7803454	0.122218	0.122218	4.8e-09	99914532	100638465	723.933	453	mQTL	chr7:99959594:T:C	rs6962405	ENSG00000201584	Y_RNA	cg11013060	Retina	4.66311e-08	0.000557	0.316755	0.0550155	0.016833	0.058086	SAME	0.899089	0.446135	chr7:99959594	FALSE	FALSE
AMD EUR	chr7:100393925:C:T	chr7:100393925:C:T	T	C	rs7803454	0.122218	0.122218	4.8e-09	99914532	100638465	723.933	453	mQTL	chr7:99959594:T:C	rs6962405	ENSG00000201596	Y_RNA	cg11013060	Retina	4.66311e-08	0.000557	0.316755	0.0550155	0.016833	0.058086	SAME	0.899089	0.446135	chr7:99959594	FALSE	FALSE
AMD EUR	chr7:100393925:C:T	chr7:100393925:C:T	T	C	rs7803454	0.122218	0.122218	4.8e-09	99914532	100638465	723.933	453	mQTL	chr7:99959594:T:C	rs6962405	ENSG00000201602	Y_RNA	cg11013060	Retina	4.66311e-08	0.000557	0.316755	0.0550155	0.016833	0.058086	SAME	0.899089	0.446135	chr7:99959594	FALSE	FALSE
AMD EUR	chr7:100393925:C:T	chr7:100393925:C:T	T	C	rs7803454	0.122218	0.122218	4.8e-09	99914532	100638465	723.933	453	mQTL	chr7:99959594:T:C	rs6962405	ENSG00000201624	Y_RNA	cg11013060	Retina	4.66311e-08	0.000557	0.316755	0.0550155	0.016833	0.058086	SAME	0.899089	0.446135	chr7:99959594	FALSE	FALSE
AMD EUR	chr7:100393925:C:T	chr7:100393925:C:T	T	C	rs7803454	0.122218	0.122218	4.8e-09	99914532	100638465	723.933	453	mQTL	chr7:99959594:T:C	rs6962405	ENSG00000201627	Y_RNA	cg11013060	Retina	4.66311e-08	0.000557	0.316755	0.0550155	0.016833	0.058086	SAME	0.899089	0.446135	chr7:99959594	FALSE	FALSE
AMD EUR	chr7:100393925:C:T	chr7:100393925:C:T	T	C	rs7803454	0.122218	0.122218	4.8e-09	99914532	100638465	723.933	453	mQTL	chr7:99959594:T:C	rs6962405	ENSG00000201633	Y_RNA	cg11013060	Retina	4.66311e-08	0.000557	0.316755	0.0550155	0.016833	0.058086	SAME	0.899089	0.446135	chr7:99959594	FALSE	FALSE
AMD EUR	chr7:100393925:C:T	chr7:100393925:C:T	T	C	rs7803454	0.122218	0.122218	4.8e-09	99914532	100638465	723.933	453	mQTL	chr7:99959594:T:C	rs6962405	ENSG00000201635	Y_RNA	cg11013060	Retina	4.66311e-08	0.000557	0.316755	0.0550155	0.016833	0.058086	SAME	0.899089	0.446135	chr7:99959594	FALSE	FALSE
AMD EUR	chr7:100393925:C:T	chr7:100393925:C:T	T	C	rs7803454	0.122218	0.122218	4.8e-09	99914532	100638465	723.933	453	mQTL	chr7:99959594:T:C	rs6962405	ENSG00000201644	Y_RNA	cg11013060	Retina	4.66311e-08	0.000557	0.316755	0.0550155	0.016833	0.058086	SAME	0.899089	0.446135	chr7:99959594	FALSE	FALSE
AMD EUR	chr7:100393925:C:T	chr7:100393925:C:T	T	C	rs7803454	0.122218	0.122218	4.8e-09	99914532	100638465	723.933	453	mQTL	chr7:99959594:T:C	rs6962405	ENSG00000201663	Y_RNA	cg11013060	Retina	4.66311e-08	0.000557	0.316755	0.0550155	0.016833	0.058086	SAME	0.899089	0.446135	chr7:99959594	FALSE	FALSE
AMD EUR	chr7:100393925:C:T	chr7:100393925:C:T	T	C	rs7803454	0.122218	0.122218	4.8e-09	99914532	100638465	723.933	453	mQTL	chr7:99959594:T:C	rs6962405	ENSG00000201668	Y_RNA	cg11013060	Retina	4.66311e-08	0.000557	0.316755	0.0550155	0.016833	0.058086	SAME	0.899089	0.446135	chr7:99959594	FALSE	FALSE
AMD EUR	chr7:100393925:C:T	chr7:100393925:C:T	T	C	rs7803454	0.122218	0.122218	4.8e-09	99914532	100638465	723.933	453	mQTL	chr7:99959594:T:C	rs6962405	ENSG00000201676	Y_RNA	cg11013060	Retina	4.66311e-08	0.000557	0.316755	0.0550155	0.016833	0.058086	SAME	0.899089	0.446135	chr7:99959594	FALSE	FALSE
AMD EUR	chr7:100393925:C:T	chr7:100393925:C:T	T	C	rs7803454	0.122218	0.122218	4.8e-09	99914532	100638465	723.933	453	mQTL	chr7:99959594:T:C	rs6962405	ENSG00000201680	Y_RNA	cg11013060	Retina	4.66311e-08	0.000557	0.316755	0.0550155	0.016833	0.058086	SAME	0.899089	0.446135	chr7:99959594	FALSE	FALSE
AMD EUR	chr7:100393925:C:T	chr7:100393925:C:T	T	C	rs7803454	0.122218	0.122218	4.8e-09	99914532	100638465	723.933	453	mQTL	chr7:99959594:T:C	rs6962405	ENSG00000201683	Y_RNA	cg11013060	Retina	4.66311e-08	0.000557	0.316755	0.0550155	0.016833	0.058086	SAME	0.899089	0.446135	chr7:99959594	FALSE	FALSE
AMD EUR	chr7:100393925:C:T	chr7:100393925:C:T	T	C	rs7803454	0.122218	0.122218	4.8e-09	99914532	100638465	723.933	453	mQTL	chr7:99959594:T:C	rs6962405	ENSG00000201723	Y_RNA	cg11013060	Retina	4.66311e-08	0.000557	0.316755	0.0550155	0.016833	0.058086	SAME	0.899089	0.446135	chr7:99959594	FALSE	FALSE
AMD EUR	chr7:100393925:C:T	chr7:100393925:C:T	T	C	rs7803454	0.122218	0.122218	4.8e-09	99914532	100638465	723.933	453	mQTL	chr7:99959594:T:C	rs6962405	ENSG00000201724	Y_RNA	cg11013060	Retina	4.66311e-08	0.000557	0.316755	0.0550155	0.016833	0.058086	SAME	0.899089	0.446135	chr7:99959594	FALSE	FALSE
AMD EUR	chr7:100393925:C:T	chr7:100393925:C:T	T	C	rs7803454	0.122218	0.122218	4.8e-09	99914532	100638465	723.933	453	mQTL	chr7:99959594:T:C	rs6962405	ENSG00000201741	Y_RNA	cg11013060	Retina	4.66311e-08	0.000557	0.316755	0.0550155	0.016833	0.058086	SAME	0.899089	0.446135	chr7:99959594	FALSE	FALSE
AMD EUR	chr7:100393925:C:T	chr7:100393925:C:T	T	C	rs7803454	0.122218	0.122218	4.8e-09	99914532	100638465	723.933	453	mQTL	chr7:99959594:T:C	rs6962405	ENSG00000201749	Y_RNA	cg11013060	Retina	4.66311e-08	0.000557	0.316755	0.0550155	0.016833	0.058086	SAME	0.899089	0.446135	chr7:99959594	FALSE	FALSE
AMD EUR	chr7:100393925:C:T	chr7:100393925:C:T	T	C	rs7803454	0.122218	0.122218	4.8e-09	99914532	100638465	723.933	453	mQTL	chr7:99959594:T:C	rs6962405	ENSG00000201756	Y_RNA	cg11013060	Retina	4.66311e-08	0.000557	0.316755	0.0550155	0.016833	0.058086	SAME	0.899089	0.446135	chr7:99959594	FALSE	FALSE
AMD EUR	chr7:100393925:C:T	chr7:100393925:C:T	T	C	rs7803454	0.122218	0.122218	4.8e-09	99914532	100638465	723.933	453	mQTL	chr7:99959594:T:C	rs6962405	ENSG00000201774	Y_RNA	cg11013060	Retina	4.66311e-08	0.000557	0.316755	0.0550155	0.016833	0.058086	SAME	0.899089	0.446135	chr7:99959594	FALSE	FALSE
AMD EUR	chr7:100393925:C:T	chr7:100393925:C:T	T	C	rs7803454	0.122218	0.122218	4.8e-09	99914532	100638465	723.933	453	mQTL	chr7:99959594:T:C	rs6962405	ENSG00000201778	Y_RNA	cg11013060	Retina	4.66311e-08	0.000557	0.316755	0.0550155	0.016833	0.058086	SAME	0.899089	0.446135	chr7:99959594	FALSE	FALSE
AMD EUR	chr7:100393925:C:T	chr7:100393925:C:T	T	C	rs7803454	0.122218	0.122218	4.8e-09	99914532	100638465	723.933	453	mQTL	chr7:99959594:T:C	rs6962405	ENSG00000201786	Y_RNA	cg11013060	Retina	4.66311e-08	0.000557	0.316755	0.0550155	0.016833	0.058086	SAME	0.899089	0.446135	chr7:99959594	FALSE	FALSE
AMD EUR	chr7:100393925:C:T	chr7:100393925:C:T	T	C	rs7803454	0.122218	0.122218	4.8e-09	99914532	100638465	723.933	453	mQTL	chr7:99959594:T:C	rs6962405	ENSG00000201788	Y_RNA	cg11013060	Retina	4.66311e-08	0.000557	0.316755	0.0550155	0.016833	0.058086	SAME	0.899089	0.446135	chr7:99959594	FALSE	FALSE
AMD EUR	chr7:100393925:C:T	chr7:100393925:C:T	T	C	rs7803454	0.122218	0.122218	4.8e-09	99914532	100638465	723.933	453	mQTL	chr7:99959594:T:C	rs6962405	ENSG00000201800	Y_RNA	cg11013060	Retina	4.66311e-08	0.000557	0.316755	0.0550155	0.016833	0.058086	SAME	0.899089	0.446135	chr7:99959594	FALSE	FALSE
AMD EUR	chr7:100393925:C:T	chr7:100393925:C:T	T	C	rs7803454	0.122218	0.122218	4.8e-09	99914532	100638465	723.933	453	mQTL	chr7:99959594:T:C	rs6962405	ENSG00000201820	Y_RNA	cg11013060	Retina	4.66311e-08	0.000557	0.316755	0.0550155	0.016833	0.058086	SAME	0.899089	0.446135	chr7:99959594	FALSE	FALSE
AMD EUR	chr7:100393925:C:T	chr7:100393925:C:T	T	C	rs7803454	0.122218	0.122218	4.8e-09	99914532	100638465	723.933	453	mQTL	chr7:99959594:T:C	rs6962405	ENSG00000201830	Y_RNA	cg11013060	Retina	4.66311e-08	0.000557	0.316755	0.0550155	0.016833	0.058086	SAME	0.899089	0.446135	chr7:99959594	FALSE	FALSE
AMD EUR	chr7:100393925:C:T	chr7:100393925:C:T	T	C	rs7803454	0.122218	0.122218	4.8e-09	99914532	100638465	723.933	453	mQTL	chr7:99959594:T:C	rs6962405	ENSG00000201843	Y_RNA	cg11013060	Retina	4.66311e-08	0.000557	0.316755	0.0550155	0.016833	0.058086	SAME	0.899089	0.446135	chr7:99959594	FALSE	FALSE
AMD EUR	chr7:100393925:C:T	chr7:100393925:C:T	T	C	rs7803454	0.122218	0.122218	4.8e-09	99914532	100638465	723.933	453	mQTL	chr7:99959594:T:C	rs6962405	ENSG00000201850	Y_RNA	cg11013060	Retina	4.66311e-08	0.000557	0.316755	0.0550155	0.016833	0.058086	SAME	0.899089	0.446135	chr7:99959594	FALSE	FALSE
AMD EUR	chr7:100393925:C:T	chr7:100393925:C:T	T	C	rs7803454	0.122218	0.122218	4.8e-09	99914532	100638465	723.933	453	mQTL	chr7:99959594:T:C	rs6962405	ENSG00000201860	Y_RNA	cg11013060	Retina	4.66311e-08	0.000557	0.316755	0.0550155	0.016833	0.058086	SAME	0.899089	0.446135	chr7:99959594	FALSE	FALSE
AMD EUR	chr7:100393925:C:T	chr7:100393925:C:T	T	C	rs7803454	0.122218	0.122218	4.8e-09	99914532	100638465	723.933	453	mQTL	chr7:99959594:T:C	rs6962405	ENSG00000201867	Y_RNA	cg11013060	Retina	4.66311e-08	0.000557	0.316755	0.0550155	0.016833	0.058086	SAME	0.899089	0.446135	chr7:99959594	FALSE	FALSE
AMD EUR	chr7:100393925:C:T	chr7:100393925:C:T	T	C	rs7803454	0.122218	0.122218	4.8e-09	99914532	100638465	723.933	453	mQTL	chr7:99959594:T:C	rs6962405	ENSG00000201868	Y_RNA	cg11013060	Retina	4.66311e-08	0.000557	0.316755	0.0550155	0.016833	0.058086	SAME	0.899089	0.446135	chr7:99959594	FALSE	FALSE
AMD EUR	chr7:100393925:C:T	chr7:100393925:C:T	T	C	rs7803454	0.122218	0.122218	4.8e-09	99914532	100638465	723.933	453	mQTL	chr7:99959594:T:C	rs6962405	ENSG00000201881	Y_RNA	cg11013060	Retina	4.66311e-08	0.000557	0.316755	0.0550155	0.016833	0.058086	SAME	0.899089	0.446135	chr7:99959594	FALSE	FALSE
AMD EUR	chr7:100393925:C:T	chr7:100393925:C:T	T	C	rs7803454	0.122218	0.122218	4.8e-09	99914532	100638465	723.933	453	mQTL	chr7:99959594:T:C	rs6962405	ENSG00000201884	Y_RNA	cg11013060	Retina	4.66311e-08	0.000557	0.316755	0.0550155	0.016833	0.058086	SAME	0.899089	0.446135	chr7:99959594	FALSE	FALSE
AMD EUR	chr7:100393925:C:T	chr7:100393925:C:T	T	C	rs7803454	0.122218	0.122218	4.8e-09	99914532	100638465	723.933	453	mQTL	chr7:99959594:T:C	rs6962405	ENSG00000201885	Y_RNA	cg11013060	Retina	4.66311e-08	0.000557	0.316755	0.0550155	0.016833	0.058086	SAME	0.899089	0.446135	chr7:99959594	FALSE	FALSE
AMD EUR	chr7:100393925:C:T	chr7:100393925:C:T	T	C	rs7803454	0.122218	0.122218	4.8e-09	99914532	100638465	723.933	453	mQTL	chr7:99959594:T:C	rs6962405	ENSG00000201892	Y_RNA	cg11013060	Retina	4.66311e-08	0.000557	0.316755	0.0550155	0.016833	0.058086	SAME	0.899089	0.446135	chr7:99959594	FALSE	FALSE
AMD EUR	chr7:100393925:C:T	chr7:100393925:C:T	T	C	rs7803454	0.122218	0.122218	4.8e-09	99914532	100638465	723.933	453	mQTL	chr7:99959594:T:C	rs6962405	ENSG00000201913	Y_RNA	cg11013060	Retina	4.66311e-08	0.000557	0.316755	0.0550155	0.016833	0.058086	SAME	0.899089	0.446135	chr7:99959594	FALSE	FALSE
AMD EUR	chr7:100393925:C:T	chr7:100393925:C:T	T	C	rs7803454	0.122218	0.122218	4.8e-09	99914532	100638465	723.933	453	mQTL	chr7:99959594:T:C	rs6962405	ENSG00000201916	Y_RNA	cg11013060	Retina	4.66311e-08	0.000557	0.316755	0.0550155	0.016833	0.058086	SAME	0.899089	0.446135	chr7:99959594	FALSE	FALSE
AMD EUR	chr7:100393925:C:T	chr7:100393925:C:T	T	C	rs7803454	0.122218	0.122218	4.8e-09	99914532	100638465	723.933	453	mQTL	chr7:99959594:T:C	rs6962405	ENSG00000201933	Y_RNA	cg11013060	Retina	4.66311e-08	0.000557	0.316755	0.0550155	0.016833	0.058086	SAME	0.899089	0.446135	chr7:99959594	FALSE	FALSE
AMD EUR	chr7:100393925:C:T	chr7:100393925:C:T	T	C	rs7803454	0.122218	0.122218	4.8e-09	99914532	100638465	723.933	453	mQTL	chr7:99959594:T:C	rs6962405	ENSG00000201938	Y_RNA	cg11013060	Retina	4.66311e-08	0.000557	0.316755	0.0550155	0.016833	0.058086	SAME	0.899089	0.446135	chr7:99959594	FALSE	FALSE
AMD EUR	chr7:100393925:C:T	chr7:100393925:C:T	T	C	rs7803454	0.122218	0.122218	4.8e-09	99914532	100638465	723.933	453	mQTL	chr7:99959594:T:C	rs6962405	ENSG00000201959	Y_RNA	cg11013060	Retina	4.66311e-08	0.000557	0.316755	0.0550155	0.016833	0.058086	SAME	0.899089	0.446135	chr7:99959594	FALSE	FALSE
AMD EUR	chr7:100393925:C:T	chr7:100393925:C:T	T	C	rs7803454	0.122218	0.122218	4.8e-09	99914532	100638465	723.933	453	mQTL	chr7:99959594:T:C	rs6962405	ENSG00000201965	Y_RNA	cg11013060	Retina	4.66311e-08	0.000557	0.316755	0.0550155	0.016833	0.058086	SAME	0.899089	0.446135	chr7:99959594	FALSE	FALSE
AMD EUR	chr7:100393925:C:T	chr7:100393925:C:T	T	C	rs7803454	0.122218	0.122218	4.8e-09	99914532	100638465	723.933	453	mQTL	chr7:99959594:T:C	rs6962405	ENSG00000201984	Y_RNA	cg11013060	Retina	4.66311e-08	0.000557	0.316755	0.0550155	0.016833	0.058086	SAME	0.899089	0.446135	chr7:99959594	FALSE	FALSE
AMD EUR	chr7:100393925:C:T	chr7:100393925:C:T	T	C	rs7803454	0.122218	0.122218	4.8e-09	99914532	100638465	723.933	453	mQTL	chr7:99959594:T:C	rs6962405	ENSG00000201987	Y_RNA	cg11013060	Retina	4.66311e-08	0.000557	0.316755	0.0550155	0.016833	0.058086	SAME	0.899089	0.446135	chr7:99959594	FALSE	FALSE
AMD EUR	chr7:100393925:C:T	chr7:100393925:C:T	T	C	rs7803454	0.122218	0.122218	4.8e-09	99914532	100638465	723.933	453	mQTL	chr7:99959594:T:C	rs6962405	ENSG00000201988	Y_RNA	cg11013060	Retina	4.66311e-08	0.000557	0.316755	0.0550155	0.016833	0.058086	SAME	0.899089	0.446135	chr7:99959594	FALSE	FALSE
AMD EUR	chr7:100393925:C:T	chr7:100393925:C:T	T	C	rs7803454	0.122218	0.122218	4.8e-09	99914532	100638465	723.933	453	mQTL	chr7:99959594:T:C	rs6962405	ENSG00000201990	Y_RNA	cg11013060	Retina	4.66311e-08	0.000557	0.316755	0.0550155	0.016833	0.058086	SAME	0.899089	0.446135	chr7:99959594	FALSE	FALSE
AMD EUR	chr7:100393925:C:T	chr7:100393925:C:T	T	C	rs7803454	0.122218	0.122218	4.8e-09	99914532	100638465	723.933	453	mQTL	chr7:99959594:T:C	rs6962405	ENSG00000202001	Y_RNA	cg11013060	Retina	4.66311e-08	0.000557	0.316755	0.0550155	0.016833	0.058086	SAME	0.899089	0.446135	chr7:99959594	FALSE	FALSE
AMD EUR	chr7:100393925:C:T	chr7:100393925:C:T	T	C	rs7803454	0.122218	0.122218	4.8e-09	99914532	100638465	723.933	453	mQTL	chr7:99959594:T:C	rs6962405	ENSG00000202008	Y_RNA	cg11013060	Retina	4.66311e-08	0.000557	0.316755	0.0550155	0.016833	0.058086	SAME	0.899089	0.446135	chr7:99959594	FALSE	FALSE
AMD EUR	chr7:100393925:C:T	chr7:100393925:C:T	T	C	rs7803454	0.122218	0.122218	4.8e-09	99914532	100638465	723.933	453	mQTL	chr7:99959594:T:C	rs6962405	ENSG00000202014	Y_RNA	cg11013060	Retina	4.66311e-08	0.000557	0.316755	0.0550155	0.016833	0.058086	SAME	0.899089	0.446135	chr7:99959594	FALSE	FALSE
AMD EUR	chr7:100393925:C:T	chr7:100393925:C:T	T	C	rs7803454	0.122218	0.122218	4.8e-09	99914532	100638465	723.933	453	mQTL	chr7:99959594:T:C	rs6962405	ENSG00000202019	Y_RNA	cg11013060	Retina	4.66311e-08	0.000557	0.316755	0.0550155	0.016833	0.058086	SAME	0.899089	0.446135	chr7:99959594	FALSE	FALSE
AMD EUR	chr7:100393925:C:T	chr7:100393925:C:T	T	C	rs7803454	0.122218	0.122218	4.8e-09	99914532	100638465	723.933	453	mQTL	chr7:99959594:T:C	rs6962405	ENSG00000202021	Y_RNA	cg11013060	Retina	4.66311e-08	0.000557	0.316755	0.0550155	0.016833	0.058086	SAME	0.899089	0.446135	chr7:99959594	FALSE	FALSE
AMD EUR	chr7:100393925:C:T	chr7:100393925:C:T	T	C	rs7803454	0.122218	0.122218	4.8e-09	99914532	100638465	723.933	453	mQTL	chr7:99959594:T:C	rs6962405	ENSG00000202027	Y_RNA	cg11013060	Retina	4.66311e-08	0.000557	0.316755	0.0550155	0.016833	0.058086	SAME	0.899089	0.446135	chr7:99959594	FALSE	FALSE
AMD EUR	chr7:100393925:C:T	chr7:100393925:C:T	T	C	rs7803454	0.122218	0.122218	4.8e-09	99914532	100638465	723.933	453	mQTL	chr7:99959594:T:C	rs6962405	ENSG00000202035	Y_RNA	cg11013060	Retina	4.66311e-08	0.000557	0.316755	0.0550155	0.016833	0.058086	SAME	0.899089	0.446135	chr7:99959594	FALSE	FALSE
AMD EUR	chr7:100393925:C:T	chr7:100393925:C:T	T	C	rs7803454	0.122218	0.122218	4.8e-09	99914532	100638465	723.933	453	mQTL	chr7:99959594:T:C	rs6962405	ENSG00000202041	Y_RNA	cg11013060	Retina	4.66311e-08	0.000557	0.316755	0.0550155	0.016833	0.058086	SAME	0.899089	0.446135	chr7:99959594	FALSE	FALSE
AMD EUR	chr7:100393925:C:T	chr7:100393925:C:T	T	C	rs7803454	0.122218	0.122218	4.8e-09	99914532	100638465	723.933	453	mQTL	chr7:99959594:T:C	rs6962405	ENSG00000202046	Y_RNA	cg11013060	Retina	4.66311e-08	0.000557	0.316755	0.0550155	0.016833	0.058086	SAME	0.899089	0.446135	chr7:99959594	FALSE	FALSE
AMD EUR	chr7:100393925:C:T	chr7:100393925:C:T	T	C	rs7803454	0.122218	0.122218	4.8e-09	99914532	100638465	723.933	453	mQTL	chr7:99959594:T:C	rs6962405	ENSG00000202071	Y_RNA	cg11013060	Retina	4.66311e-08	0.000557	0.316755	0.0550155	0.016833	0.058086	SAME	0.899089	0.446135	chr7:99959594	FALSE	FALSE
AMD EUR	chr7:100393925:C:T	chr7:100393925:C:T	T	C	rs7803454	0.122218	0.122218	4.8e-09	99914532	100638465	723.933	453	mQTL	chr7:99959594:T:C	rs6962405	ENSG00000202078	Y_RNA	cg11013060	Retina	4.66311e-08	0.000557	0.316755	0.0550155	0.016833	0.058086	SAME	0.899089	0.446135	chr7:99959594	FALSE	FALSE
AMD EUR	chr7:100393925:C:T	chr7:100393925:C:T	T	C	rs7803454	0.122218	0.122218	4.8e-09	99914532	100638465	723.933	453	mQTL	chr7:99959594:T:C	rs6962405	ENSG00000202079	Y_RNA	cg11013060	Retina	4.66311e-08	0.000557	0.316755	0.0550155	0.016833	0.058086	SAME	0.899089	0.446135	chr7:99959594	FALSE	FALSE
AMD EUR	chr7:100393925:C:T	chr7:100393925:C:T	T	C	rs7803454	0.122218	0.122218	4.8e-09	99914532	100638465	723.933	453	mQTL	chr7:99959594:T:C	rs6962405	ENSG00000202100	Y_RNA	cg11013060	Retina	4.66311e-08	0.000557	0.316755	0.0550155	0.016833	0.058086	SAME	0.899089	0.446135	chr7:99959594	FALSE	FALSE
AMD EUR	chr7:100393925:C:T	chr7:100393925:C:T	T	C	rs7803454	0.122218	0.122218	4.8e-09	99914532	100638465	723.933	453	mQTL	chr7:99959594:T:C	rs6962405	ENSG00000202137	Y_RNA	cg11013060	Retina	4.66311e-08	0.000557	0.316755	0.0550155	0.016833	0.058086	SAME	0.899089	0.446135	chr7:99959594	FALSE	FALSE
AMD EUR	chr7:100393925:C:T	chr7:100393925:C:T	T	C	rs7803454	0.122218	0.122218	4.8e-09	99914532	100638465	723.933	453	mQTL	chr7:99959594:T:C	rs6962405	ENSG00000202141	Y_RNA	cg11013060	Retina	4.66311e-08	0.000557	0.316755	0.0550155	0.016833	0.058086	SAME	0.899089	0.446135	chr7:99959594	FALSE	FALSE
AMD EUR	chr7:100393925:C:T	chr7:100393925:C:T	T	C	rs7803454	0.122218	0.122218	4.8e-09	99914532	100638465	723.933	453	mQTL	chr7:99959594:T:C	rs6962405	ENSG00000202144	Y_RNA	cg11013060	Retina	4.66311e-08	0.000557	0.316755	0.0550155	0.016833	0.058086	SAME	0.899089	0.446135	chr7:99959594	FALSE	FALSE
AMD EUR	chr7:100393925:C:T	chr7:100393925:C:T	T	C	rs7803454	0.122218	0.122218	4.8e-09	99914532	100638465	723.933	453	mQTL	chr7:99959594:T:C	rs6962405	ENSG00000202146	Y_RNA	cg11013060	Retina	4.66311e-08	0.000557	0.316755	0.0550155	0.016833	0.058086	SAME	0.899089	0.446135	chr7:99959594	FALSE	FALSE
AMD EUR	chr7:100393925:C:T	chr7:100393925:C:T	T	C	rs7803454	0.122218	0.122218	4.8e-09	99914532	100638465	723.933	453	mQTL	chr7:99959594:T:C	rs6962405	ENSG00000202169	Y_RNA	cg11013060	Retina	4.66311e-08	0.000557	0.316755	0.0550155	0.016833	0.058086	SAME	0.899089	0.446135	chr7:99959594	FALSE	FALSE
AMD EUR	chr7:100393925:C:T	chr7:100393925:C:T	T	C	rs7803454	0.122218	0.122218	4.8e-09	99914532	100638465	723.933	453	mQTL	chr7:99959594:T:C	rs6962405	ENSG00000202177	Y_RNA	cg11013060	Retina	4.66311e-08	0.000557	0.316755	0.0550155	0.016833	0.058086	SAME	0.899089	0.446135	chr7:99959594	FALSE	FALSE
AMD EUR	chr7:100393925:C:T	chr7:100393925:C:T	T	C	rs7803454	0.122218	0.122218	4.8e-09	99914532	100638465	723.933	453	mQTL	chr7:99959594:T:C	rs6962405	ENSG00000202182	Y_RNA	cg11013060	Retina	4.66311e-08	0.000557	0.316755	0.0550155	0.016833	0.058086	SAME	0.899089	0.446135	chr7:99959594	FALSE	FALSE
AMD EUR	chr7:100393925:C:T	chr7:100393925:C:T	T	C	rs7803454	0.122218	0.122218	4.8e-09	99914532	100638465	723.933	453	mQTL	chr7:99959594:T:C	rs6962405	ENSG00000202190	Y_RNA	cg11013060	Retina	4.66311e-08	0.000557	0.316755	0.0550155	0.016833	0.058086	SAME	0.899089	0.446135	chr7:99959594	FALSE	FALSE
AMD EUR	chr7:100393925:C:T	chr7:100393925:C:T	T	C	rs7803454	0.122218	0.122218	4.8e-09	99914532	100638465	723.933	453	mQTL	chr7:99959594:T:C	rs6962405	ENSG00000202195	Y_RNA	cg11013060	Retina	4.66311e-08	0.000557	0.316755	0.0550155	0.016833	0.058086	SAME	0.899089	0.446135	chr7:99959594	FALSE	FALSE
AMD EUR	chr7:100393925:C:T	chr7:100393925:C:T	T	C	rs7803454	0.122218	0.122218	4.8e-09	99914532	100638465	723.933	453	mQTL	chr7:99959594:T:C	rs6962405	ENSG00000202200	Y_RNA	cg11013060	Retina	4.66311e-08	0.000557	0.316755	0.0550155	0.016833	0.058086	SAME	0.899089	0.446135	chr7:99959594	FALSE	FALSE
AMD EUR	chr7:100393925:C:T	chr7:100393925:C:T	T	C	rs7803454	0.122218	0.122218	4.8e-09	99914532	100638465	723.933	453	mQTL	chr7:99959594:T:C	rs6962405	ENSG00000202211	Y_RNA	cg11013060	Retina	4.66311e-08	0.000557	0.316755	0.0550155	0.016833	0.058086	SAME	0.899089	0.446135	chr7:99959594	FALSE	FALSE
AMD EUR	chr7:100393925:C:T	chr7:100393925:C:T	T	C	rs7803454	0.122218	0.122218	4.8e-09	99914532	100638465	723.933	453	mQTL	chr7:99959594:T:C	rs6962405	ENSG00000202222	Y_RNA	cg11013060	Retina	4.66311e-08	0.000557	0.316755	0.0550155	0.016833	0.058086	SAME	0.899089	0.446135	chr7:99959594	FALSE	FALSE
AMD EUR	chr7:100393925:C:T	chr7:100393925:C:T	T	C	rs7803454	0.122218	0.122218	4.8e-09	99914532	100638465	723.933	453	mQTL	chr7:99959594:T:C	rs6962405	ENSG00000202224	Y_RNA	cg11013060	Retina	4.66311e-08	0.000557	0.316755	0.0550155	0.016833	0.058086	SAME	0.899089	0.446135	chr7:99959594	FALSE	FALSE
AMD EUR	chr7:100393925:C:T	chr7:100393925:C:T	T	C	rs7803454	0.122218	0.122218	4.8e-09	99914532	100638465	723.933	453	mQTL	chr7:99959594:T:C	rs6962405	ENSG00000202251	Y_RNA	cg11013060	Retina	4.66311e-08	0.000557	0.316755	0.0550155	0.016833	0.058086	SAME	0.899089	0.446135	chr7:99959594	FALSE	FALSE
AMD EUR	chr7:100393925:C:T	chr7:100393925:C:T	T	C	rs7803454	0.122218	0.122218	4.8e-09	99914532	100638465	723.933	453	mQTL	chr7:99959594:T:C	rs6962405	ENSG00000202254	Y_RNA	cg11013060	Retina	4.66311e-08	0.000557	0.316755	0.0550155	0.016833	0.058086	SAME	0.899089	0.446135	chr7:99959594	FALSE	FALSE
AMD EUR	chr7:100393925:C:T	chr7:100393925:C:T	T	C	rs7803454	0.122218	0.122218	4.8e-09	99914532	100638465	723.933	453	mQTL	chr7:99959594:T:C	rs6962405	ENSG00000202255	Y_RNA	cg11013060	Retina	4.66311e-08	0.000557	0.316755	0.0550155	0.016833	0.058086	SAME	0.899089	0.446135	chr7:99959594	FALSE	FALSE
AMD EUR	chr7:100393925:C:T	chr7:100393925:C:T	T	C	rs7803454	0.122218	0.122218	4.8e-09	99914532	100638465	723.933	453	mQTL	chr7:99959594:T:C	rs6962405	ENSG00000202272	Y_RNA	cg11013060	Retina	4.66311e-08	0.000557	0.316755	0.0550155	0.016833	0.058086	SAME	0.899089	0.446135	chr7:99959594	FALSE	FALSE
AMD EUR	chr7:100393925:C:T	chr7:100393925:C:T	T	C	rs7803454	0.122218	0.122218	4.8e-09	99914532	100638465	723.933	453	mQTL	chr7:99959594:T:C	rs6962405	ENSG00000202273	Y_RNA	cg11013060	Retina	4.66311e-08	0.000557	0.316755	0.0550155	0.016833	0.058086	SAME	0.899089	0.446135	chr7:99959594	FALSE	FALSE
AMD EUR	chr7:100393925:C:T	chr7:100393925:C:T	T	C	rs7803454	0.122218	0.122218	4.8e-09	99914532	100638465	723.933	453	mQTL	chr7:99959594:T:C	rs6962405	ENSG00000202276	Y_RNA	cg11013060	Retina	4.66311e-08	0.000557	0.316755	0.0550155	0.016833	0.058086	SAME	0.899089	0.446135	chr7:99959594	FALSE	FALSE
AMD EUR	chr7:100393925:C:T	chr7:100393925:C:T	T	C	rs7803454	0.122218	0.122218	4.8e-09	99914532	100638465	723.933	453	mQTL	chr7:99959594:T:C	rs6962405	ENSG00000202279	Y_RNA	cg11013060	Retina	4.66311e-08	0.000557	0.316755	0.0550155	0.016833	0.058086	SAME	0.899089	0.446135	chr7:99959594	FALSE	FALSE
AMD EUR	chr7:100393925:C:T	chr7:100393925:C:T	T	C	rs7803454	0.122218	0.122218	4.8e-09	99914532	100638465	723.933	453	mQTL	chr7:99959594:T:C	rs6962405	ENSG00000202306	Y_RNA	cg11013060	Retina	4.66311e-08	0.000557	0.316755	0.0550155	0.016833	0.058086	SAME	0.899089	0.446135	chr7:99959594	FALSE	FALSE
AMD EUR	chr7:100393925:C:T	chr7:100393925:C:T	T	C	rs7803454	0.122218	0.122218	4.8e-09	99914532	100638465	723.933	453	mQTL	chr7:99959594:T:C	rs6962405	ENSG00000202309	Y_RNA	cg11013060	Retina	4.66311e-08	0.000557	0.316755	0.0550155	0.016833	0.058086	SAME	0.899089	0.446135	chr7:99959594	FALSE	FALSE
AMD EUR	chr7:100393925:C:T	chr7:100393925:C:T	T	C	rs7803454	0.122218	0.122218	4.8e-09	99914532	100638465	723.933	453	mQTL	chr7:99959594:T:C	rs6962405	ENSG00000202310	Y_RNA	cg11013060	Retina	4.66311e-08	0.000557	0.316755	0.0550155	0.016833	0.058086	SAME	0.899089	0.446135	chr7:99959594	FALSE	FALSE
AMD EUR	chr7:100393925:C:T	chr7:100393925:C:T	T	C	rs7803454	0.122218	0.122218	4.8e-09	99914532	100638465	723.933	453	mQTL	chr7:99959594:T:C	rs6962405	ENSG00000202318	Y_RNA	cg11013060	Retina	4.66311e-08	0.000557	0.316755	0.0550155	0.016833	0.058086	SAME	0.899089	0.446135	chr7:99959594	FALSE	FALSE
AMD EUR	chr7:100393925:C:T	chr7:100393925:C:T	T	C	rs7803454	0.122218	0.122218	4.8e-09	99914532	100638465	723.933	453	mQTL	chr7:99959594:T:C	rs6962405	ENSG00000202332	Y_RNA	cg11013060	Retina	4.66311e-08	0.000557	0.316755	0.0550155	0.016833	0.058086	SAME	0.899089	0.446135	chr7:99959594	FALSE	FALSE
AMD EUR	chr7:100393925:C:T	chr7:100393925:C:T	T	C	rs7803454	0.122218	0.122218	4.8e-09	99914532	100638465	723.933	453	mQTL	chr7:99959594:T:C	rs6962405	ENSG00000202345	Y_RNA	cg11013060	Retina	4.66311e-08	0.000557	0.316755	0.0550155	0.016833	0.058086	SAME	0.899089	0.446135	chr7:99959594	FALSE	FALSE
AMD EUR	chr7:100393925:C:T	chr7:100393925:C:T	T	C	rs7803454	0.122218	0.122218	4.8e-09	99914532	100638465	723.933	453	mQTL	chr7:99959594:T:C	rs6962405	ENSG00000202357	Y_RNA	cg11013060	Retina	4.66311e-08	0.000557	0.316755	0.0550155	0.016833	0.058086	SAME	0.899089	0.446135	chr7:99959594	FALSE	FALSE
AMD EUR	chr7:100393925:C:T	chr7:100393925:C:T	T	C	rs7803454	0.122218	0.122218	4.8e-09	99914532	100638465	723.933	453	mQTL	chr7:99959594:T:C	rs6962405	ENSG00000202361	Y_RNA	cg11013060	Retina	4.66311e-08	0.000557	0.316755	0.0550155	0.016833	0.058086	SAME	0.899089	0.446135	chr7:99959594	FALSE	FALSE
AMD EUR	chr7:100393925:C:T	chr7:100393925:C:T	T	C	rs7803454	0.122218	0.122218	4.8e-09	99914532	100638465	723.933	453	mQTL	chr7:99959594:T:C	rs6962405	ENSG00000202368	Y_RNA	cg11013060	Retina	4.66311e-08	0.000557	0.316755	0.0550155	0.016833	0.058086	SAME	0.899089	0.446135	chr7:99959594	FALSE	FALSE
AMD EUR	chr7:100393925:C:T	chr7:100393925:C:T	T	C	rs7803454	0.122218	0.122218	4.8e-09	99914532	100638465	723.933	453	mQTL	chr7:99959594:T:C	rs6962405	ENSG00000202382	Y_RNA	cg11013060	Retina	4.66311e-08	0.000557	0.316755	0.0550155	0.016833	0.058086	SAME	0.899089	0.446135	chr7:99959594	FALSE	FALSE
AMD EUR	chr7:100393925:C:T	chr7:100393925:C:T	T	C	rs7803454	0.122218	0.122218	4.8e-09	99914532	100638465	723.933	453	mQTL	chr7:99959594:T:C	rs6962405	ENSG00000202385	Y_RNA	cg11013060	Retina	4.66311e-08	0.000557	0.316755	0.0550155	0.016833	0.058086	SAME	0.899089	0.446135	chr7:99959594	FALSE	FALSE
AMD EUR	chr7:100393925:C:T	chr7:100393925:C:T	T	C	rs7803454	0.122218	0.122218	4.8e-09	99914532	100638465	723.933	453	mQTL	chr7:99959594:T:C	rs6962405	ENSG00000202388	Y_RNA	cg11013060	Retina	4.66311e-08	0.000557	0.316755	0.0550155	0.016833	0.058086	SAME	0.899089	0.446135	chr7:99959594	FALSE	FALSE
AMD EUR	chr7:100393925:C:T	chr7:100393925:C:T	T	C	rs7803454	0.122218	0.122218	4.8e-09	99914532	100638465	723.933	453	mQTL	chr7:99959594:T:C	rs6962405	ENSG00000202399	Y_RNA	cg11013060	Retina	4.66311e-08	0.000557	0.316755	0.0550155	0.016833	0.058086	SAME	0.899089	0.446135	chr7:99959594	FALSE	FALSE
AMD EUR	chr7:100393925:C:T	chr7:100393925:C:T	T	C	rs7803454	0.122218	0.122218	4.8e-09	99914532	100638465	723.933	453	mQTL	chr7:99959594:T:C	rs6962405	ENSG00000202402	Y_RNA	cg11013060	Retina	4.66311e-08	0.000557	0.316755	0.0550155	0.016833	0.058086	SAME	0.899089	0.446135	chr7:99959594	FALSE	FALSE
AMD EUR	chr7:100393925:C:T	chr7:100393925:C:T	T	C	rs7803454	0.122218	0.122218	4.8e-09	99914532	100638465	723.933	453	mQTL	chr7:99959594:T:C	rs6962405	ENSG00000202407	Y_RNA	cg11013060	Retina	4.66311e-08	0.000557	0.316755	0.0550155	0.016833	0.058086	SAME	0.899089	0.446135	chr7:99959594	FALSE	FALSE
AMD EUR	chr7:100393925:C:T	chr7:100393925:C:T	T	C	rs7803454	0.122218	0.122218	4.8e-09	99914532	100638465	723.933	453	mQTL	chr7:99959594:T:C	rs6962405	ENSG00000202410	Y_RNA	cg11013060	Retina	4.66311e-08	0.000557	0.316755	0.0550155	0.016833	0.058086	SAME	0.899089	0.446135	chr7:99959594	FALSE	FALSE
AMD EUR	chr7:100393925:C:T	chr7:100393925:C:T	T	C	rs7803454	0.122218	0.122218	4.8e-09	99914532	100638465	723.933	453	mQTL	chr7:99959594:T:C	rs6962405	ENSG00000202414	Y_RNA	cg11013060	Retina	4.66311e-08	0.000557	0.316755	0.0550155	0.016833	0.058086	SAME	0.899089	0.446135	chr7:99959594	FALSE	FALSE
AMD EUR	chr7:100393925:C:T	chr7:100393925:C:T	T	C	rs7803454	0.122218	0.122218	4.8e-09	99914532	100638465	723.933	453	mQTL	chr7:99959594:T:C	rs6962405	ENSG00000202417	Y_RNA	cg11013060	Retina	4.66311e-08	0.000557	0.316755	0.0550155	0.016833	0.058086	SAME	0.899089	0.446135	chr7:99959594	FALSE	FALSE
AMD EUR	chr7:100393925:C:T	chr7:100393925:C:T	T	C	rs7803454	0.122218	0.122218	4.8e-09	99914532	100638465	723.933	453	mQTL	chr7:99959594:T:C	rs6962405	ENSG00000202438	Y_RNA	cg11013060	Retina	4.66311e-08	0.000557	0.316755	0.0550155	0.016833	0.058086	SAME	0.899089	0.446135	chr7:99959594	FALSE	FALSE
AMD EUR	chr7:100393925:C:T	chr7:100393925:C:T	T	C	rs7803454	0.122218	0.122218	4.8e-09	99914532	100638465	723.933	453	mQTL	chr7:99959594:T:C	rs6962405	ENSG00000202459	Y_RNA	cg11013060	Retina	4.66311e-08	0.000557	0.316755	0.0550155	0.016833	0.058086	SAME	0.899089	0.446135	chr7:99959594	FALSE	FALSE
AMD EUR	chr7:100393925:C:T	chr7:100393925:C:T	T	C	rs7803454	0.122218	0.122218	4.8e-09	99914532	100638465	723.933	453	mQTL	chr7:99959594:T:C	rs6962405	ENSG00000202461	Y_RNA	cg11013060	Retina	4.66311e-08	0.000557	0.316755	0.0550155	0.016833	0.058086	SAME	0.899089	0.446135	chr7:99959594	FALSE	FALSE
AMD EUR	chr7:100393925:C:T	chr7:100393925:C:T	T	C	rs7803454	0.122218	0.122218	4.8e-09	99914532	100638465	723.933	453	mQTL	chr7:99959594:T:C	rs6962405	ENSG00000202469	Y_RNA	cg11013060	Retina	4.66311e-08	0.000557	0.316755	0.0550155	0.016833	0.058086	SAME	0.899089	0.446135	chr7:99959594	FALSE	FALSE
AMD EUR	chr7:100393925:C:T	chr7:100393925:C:T	T	C	rs7803454	0.122218	0.122218	4.8e-09	99914532	100638465	723.933	453	mQTL	chr7:99959594:T:C	rs6962405	ENSG00000202470	Y_RNA	cg11013060	Retina	4.66311e-08	0.000557	0.316755	0.0550155	0.016833	0.058086	SAME	0.899089	0.446135	chr7:99959594	FALSE	FALSE
AMD EUR	chr7:100393925:C:T	chr7:100393925:C:T	T	C	rs7803454	0.122218	0.122218	4.8e-09	99914532	100638465	723.933	453	mQTL	chr7:99959594:T:C	rs6962405	ENSG00000202476	Y_RNA	cg11013060	Retina	4.66311e-08	0.000557	0.316755	0.0550155	0.016833	0.058086	SAME	0.899089	0.446135	chr7:99959594	FALSE	FALSE
AMD EUR	chr7:100393925:C:T	chr7:100393925:C:T	T	C	rs7803454	0.122218	0.122218	4.8e-09	99914532	100638465	723.933	453	mQTL	chr7:99959594:T:C	rs6962405	ENSG00000202495	Y_RNA	cg11013060	Retina	4.66311e-08	0.000557	0.316755	0.0550155	0.016833	0.058086	SAME	0.899089	0.446135	chr7:99959594	FALSE	FALSE
AMD EUR	chr7:100393925:C:T	chr7:100393925:C:T	T	C	rs7803454	0.122218	0.122218	4.8e-09	99914532	100638465	723.933	453	mQTL	chr7:99959594:T:C	rs6962405	ENSG00000202508	Y_RNA	cg11013060	Retina	4.66311e-08	0.000557	0.316755	0.0550155	0.016833	0.058086	SAME	0.899089	0.446135	chr7:99959594	FALSE	FALSE
AMD EUR	chr7:100393925:C:T	chr7:100393925:C:T	T	C	rs7803454	0.122218	0.122218	4.8e-09	99914532	100638465	723.933	453	mQTL	chr7:99959594:T:C	rs6962405	ENSG00000202514	Y_RNA	cg11013060	Retina	4.66311e-08	0.000557	0.316755	0.0550155	0.016833	0.058086	SAME	0.899089	0.446135	chr7:99959594	FALSE	FALSE
AMD EUR	chr7:100393925:C:T	chr7:100393925:C:T	T	C	rs7803454	0.122218	0.122218	4.8e-09	99914532	100638465	723.933	453	mQTL	chr7:99959594:T:C	rs6962405	ENSG00000202522	Y_RNA	cg11013060	Retina	4.66311e-08	0.000557	0.316755	0.0550155	0.016833	0.058086	SAME	0.899089	0.446135	chr7:99959594	FALSE	FALSE
AMD EUR	chr7:100393925:C:T	chr7:100393925:C:T	T	C	rs7803454	0.122218	0.122218	4.8e-09	99914532	100638465	723.933	453	mQTL	chr7:99959594:T:C	rs6962405	ENSG00000202523	Y_RNA	cg11013060	Retina	4.66311e-08	0.000557	0.316755	0.0550155	0.016833	0.058086	SAME	0.899089	0.446135	chr7:99959594	FALSE	FALSE
AMD EUR	chr7:100393925:C:T	chr7:100393925:C:T	T	C	rs7803454	0.122218	0.122218	4.8e-09	99914532	100638465	723.933	453	mQTL	chr7:99959594:T:C	rs6962405	ENSG00000202533	Y_RNA	cg11013060	Retina	4.66311e-08	0.000557	0.316755	0.0550155	0.016833	0.058086	SAME	0.899089	0.446135	chr7:99959594	FALSE	FALSE
AMD EUR	chr7:100393925:C:T	chr7:100393925:C:T	T	C	rs7803454	0.122218	0.122218	4.8e-09	99914532	100638465	723.933	453	mQTL	chr7:99959594:T:C	rs6962405	ENSG00000202536	Y_RNA	cg11013060	Retina	4.66311e-08	0.000557	0.316755	0.0550155	0.016833	0.058086	SAME	0.899089	0.446135	chr7:99959594	FALSE	FALSE
AMD EUR	chr7:100393925:C:T	chr7:100393925:C:T	T	C	rs7803454	0.122218	0.122218	4.8e-09	99914532	100638465	723.933	453	mQTL	chr7:99959594:T:C	rs6962405	ENSG00000202542	Y_RNA	cg11013060	Retina	4.66311e-08	0.000557	0.316755	0.0550155	0.016833	0.058086	SAME	0.899089	0.446135	chr7:99959594	FALSE	FALSE
AMD EUR	chr7:100393925:C:T	chr7:100393925:C:T	T	C	rs7803454	0.122218	0.122218	4.8e-09	99914532	100638465	723.933	453	mQTL	chr7:99959594:T:C	rs6962405	ENSG00000206582	Y_RNA	cg11013060	Retina	4.66311e-08	0.000557	0.316755	0.0550155	0.016833	0.058086	SAME	0.899089	0.446135	chr7:99959594	FALSE	FALSE
AMD EUR	chr7:100393925:C:T	chr7:100393925:C:T	T	C	rs7803454	0.122218	0.122218	4.8e-09	99914532	100638465	723.933	453	mQTL	chr7:99959594:T:C	rs6962405	ENSG00000206636	Y_RNA	cg11013060	Retina	4.66311e-08	0.000557	0.316755	0.0550155	0.016833	0.058086	SAME	0.899089	0.446135	chr7:99959594	FALSE	FALSE
AMD EUR	chr7:100393925:C:T	chr7:100393925:C:T	T	C	rs7803454	0.122218	0.122218	4.8e-09	99914532	100638465	723.933	453	mQTL	chr7:99959594:T:C	rs6962405	ENSG00000206639	Y_RNA	cg11013060	Retina	4.66311e-08	0.000557	0.316755	0.0550155	0.016833	0.058086	SAME	0.899089	0.446135	chr7:99959594	FALSE	FALSE
AMD EUR	chr7:100393925:C:T	chr7:100393925:C:T	T	C	rs7803454	0.122218	0.122218	4.8e-09	99914532	100638465	723.933	453	mQTL	chr7:99959594:T:C	rs6962405	ENSG00000206640	Y_RNA	cg11013060	Retina	4.66311e-08	0.000557	0.316755	0.0550155	0.016833	0.058086	SAME	0.899089	0.446135	chr7:99959594	FALSE	FALSE
AMD EUR	chr7:100393925:C:T	chr7:100393925:C:T	T	C	rs7803454	0.122218	0.122218	4.8e-09	99914532	100638465	723.933	453	mQTL	chr7:99959594:T:C	rs6962405	ENSG00000206645	Y_RNA	cg11013060	Retina	4.66311e-08	0.000557	0.316755	0.0550155	0.016833	0.058086	SAME	0.899089	0.446135	chr7:99959594	FALSE	FALSE
AMD EUR	chr7:100393925:C:T	chr7:100393925:C:T	T	C	rs7803454	0.122218	0.122218	4.8e-09	99914532	100638465	723.933	453	mQTL	chr7:99959594:T:C	rs6962405	ENSG00000206646	Y_RNA	cg11013060	Retina	4.66311e-08	0.000557	0.316755	0.0550155	0.016833	0.058086	SAME	0.899089	0.446135	chr7:99959594	FALSE	FALSE
AMD EUR	chr7:100393925:C:T	chr7:100393925:C:T	T	C	rs7803454	0.122218	0.122218	4.8e-09	99914532	100638465	723.933	453	mQTL	chr7:99959594:T:C	rs6962405	ENSG00000206651	Y_RNA	cg11013060	Retina	4.66311e-08	0.000557	0.316755	0.0550155	0.016833	0.058086	SAME	0.899089	0.446135	chr7:99959594	FALSE	FALSE
AMD EUR	chr7:100393925:C:T	chr7:100393925:C:T	T	C	rs7803454	0.122218	0.122218	4.8e-09	99914532	100638465	723.933	453	mQTL	chr7:99959594:T:C	rs6962405	ENSG00000206659	Y_RNA	cg11013060	Retina	4.66311e-08	0.000557	0.316755	0.0550155	0.016833	0.058086	SAME	0.899089	0.446135	chr7:99959594	FALSE	FALSE
AMD EUR	chr7:100393925:C:T	chr7:100393925:C:T	T	C	rs7803454	0.122218	0.122218	4.8e-09	99914532	100638465	723.933	453	mQTL	chr7:99959594:T:C	rs6962405	ENSG00000206660	Y_RNA	cg11013060	Retina	4.66311e-08	0.000557	0.316755	0.0550155	0.016833	0.058086	SAME	0.899089	0.446135	chr7:99959594	FALSE	FALSE
AMD EUR	chr7:100393925:C:T	chr7:100393925:C:T	T	C	rs7803454	0.122218	0.122218	4.8e-09	99914532	100638465	723.933	453	mQTL	chr7:99959594:T:C	rs6962405	ENSG00000206662	Y_RNA	cg11013060	Retina	4.66311e-08	0.000557	0.316755	0.0550155	0.016833	0.058086	SAME	0.899089	0.446135	chr7:99959594	FALSE	FALSE
AMD EUR	chr7:100393925:C:T	chr7:100393925:C:T	T	C	rs7803454	0.122218	0.122218	4.8e-09	99914532	100638465	723.933	453	mQTL	chr7:99959594:T:C	rs6962405	ENSG00000206663	Y_RNA	cg11013060	Retina	4.66311e-08	0.000557	0.316755	0.0550155	0.016833	0.058086	SAME	0.899089	0.446135	chr7:99959594	FALSE	FALSE
AMD EUR	chr7:100393925:C:T	chr7:100393925:C:T	T	C	rs7803454	0.122218	0.122218	4.8e-09	99914532	100638465	723.933	453	mQTL	chr7:99959594:T:C	rs6962405	ENSG00000206669	Y_RNA	cg11013060	Retina	4.66311e-08	0.000557	0.316755	0.0550155	0.016833	0.058086	SAME	0.899089	0.446135	chr7:99959594	FALSE	FALSE
AMD EUR	chr7:100393925:C:T	chr7:100393925:C:T	T	C	rs7803454	0.122218	0.122218	4.8e-09	99914532	100638465	723.933	453	mQTL	chr7:99959594:T:C	rs6962405	ENSG00000206672	Y_RNA	cg11013060	Retina	4.66311e-08	0.000557	0.316755	0.0550155	0.016833	0.058086	SAME	0.899089	0.446135	chr7:99959594	FALSE	FALSE
AMD EUR	chr7:100393925:C:T	chr7:100393925:C:T	T	C	rs7803454	0.122218	0.122218	4.8e-09	99914532	100638465	723.933	453	mQTL	chr7:99959594:T:C	rs6962405	ENSG00000206676	Y_RNA	cg11013060	Retina	4.66311e-08	0.000557	0.316755	0.0550155	0.016833	0.058086	SAME	0.899089	0.446135	chr7:99959594	FALSE	FALSE
AMD EUR	chr7:100393925:C:T	chr7:100393925:C:T	T	C	rs7803454	0.122218	0.122218	4.8e-09	99914532	100638465	723.933	453	mQTL	chr7:99959594:T:C	rs6962405	ENSG00000206677	Y_RNA	cg11013060	Retina	4.66311e-08	0.000557	0.316755	0.0550155	0.016833	0.058086	SAME	0.899089	0.446135	chr7:99959594	FALSE	FALSE
AMD EUR	chr7:100393925:C:T	chr7:100393925:C:T	T	C	rs7803454	0.122218	0.122218	4.8e-09	99914532	100638465	723.933	453	mQTL	chr7:99959594:T:C	rs6962405	ENSG00000206679	Y_RNA	cg11013060	Retina	4.66311e-08	0.000557	0.316755	0.0550155	0.016833	0.058086	SAME	0.899089	0.446135	chr7:99959594	FALSE	FALSE
AMD EUR	chr7:100393925:C:T	chr7:100393925:C:T	T	C	rs7803454	0.122218	0.122218	4.8e-09	99914532	100638465	723.933	453	mQTL	chr7:99959594:T:C	rs6962405	ENSG00000206682	Y_RNA	cg11013060	Retina	4.66311e-08	0.000557	0.316755	0.0550155	0.016833	0.058086	SAME	0.899089	0.446135	chr7:99959594	FALSE	FALSE
AMD EUR	chr7:100393925:C:T	chr7:100393925:C:T	T	C	rs7803454	0.122218	0.122218	4.8e-09	99914532	100638465	723.933	453	mQTL	chr7:99959594:T:C	rs6962405	ENSG00000206690	Y_RNA	cg11013060	Retina	4.66311e-08	0.000557	0.316755	0.0550155	0.016833	0.058086	SAME	0.899089	0.446135	chr7:99959594	FALSE	FALSE
AMD EUR	chr7:100393925:C:T	chr7:100393925:C:T	T	C	rs7803454	0.122218	0.122218	4.8e-09	99914532	100638465	723.933	453	mQTL	chr7:99959594:T:C	rs6962405	ENSG00000206692	Y_RNA	cg11013060	Retina	4.66311e-08	0.000557	0.316755	0.0550155	0.016833	0.058086	SAME	0.899089	0.446135	chr7:99959594	FALSE	FALSE
AMD EUR	chr7:100393925:C:T	chr7:100393925:C:T	T	C	rs7803454	0.122218	0.122218	4.8e-09	99914532	100638465	723.933	453	mQTL	chr7:99959594:T:C	rs6962405	ENSG00000206699	Y_RNA	cg11013060	Retina	4.66311e-08	0.000557	0.316755	0.0550155	0.016833	0.058086	SAME	0.899089	0.446135	chr7:99959594	FALSE	FALSE
AMD EUR	chr7:100393925:C:T	chr7:100393925:C:T	T	C	rs7803454	0.122218	0.122218	4.8e-09	99914532	100638465	723.933	453	mQTL	chr7:99959594:T:C	rs6962405	ENSG00000206704	Y_RNA	cg11013060	Retina	4.66311e-08	0.000557	0.316755	0.0550155	0.016833	0.058086	SAME	0.899089	0.446135	chr7:99959594	FALSE	FALSE
AMD EUR	chr7:100393925:C:T	chr7:100393925:C:T	T	C	rs7803454	0.122218	0.122218	4.8e-09	99914532	100638465	723.933	453	mQTL	chr7:99959594:T:C	rs6962405	ENSG00000206705	Y_RNA	cg11013060	Retina	4.66311e-08	0.000557	0.316755	0.0550155	0.016833	0.058086	SAME	0.899089	0.446135	chr7:99959594	FALSE	FALSE
AMD EUR	chr7:100393925:C:T	chr7:100393925:C:T	T	C	rs7803454	0.122218	0.122218	4.8e-09	99914532	100638465	723.933	453	mQTL	chr7:99959594:T:C	rs6962405	ENSG00000206706	Y_RNA	cg11013060	Retina	4.66311e-08	0.000557	0.316755	0.0550155	0.016833	0.058086	SAME	0.899089	0.446135	chr7:99959594	FALSE	FALSE
AMD EUR	chr7:100393925:C:T	chr7:100393925:C:T	T	C	rs7803454	0.122218	0.122218	4.8e-09	99914532	100638465	723.933	453	mQTL	chr7:99959594:T:C	rs6962405	ENSG00000206711	Y_RNA	cg11013060	Retina	4.66311e-08	0.000557	0.316755	0.0550155	0.016833	0.058086	SAME	0.899089	0.446135	chr7:99959594	FALSE	FALSE
AMD EUR	chr7:100393925:C:T	chr7:100393925:C:T	T	C	rs7803454	0.122218	0.122218	4.8e-09	99914532	100638465	723.933	453	mQTL	chr7:99959594:T:C	rs6962405	ENSG00000206713	Y_RNA	cg11013060	Retina	4.66311e-08	0.000557	0.316755	0.0550155	0.016833	0.058086	SAME	0.899089	0.446135	chr7:99959594	FALSE	FALSE
AMD EUR	chr7:100393925:C:T	chr7:100393925:C:T	T	C	rs7803454	0.122218	0.122218	4.8e-09	99914532	100638465	723.933	453	mQTL	chr7:99959594:T:C	rs6962405	ENSG00000206714	Y_RNA	cg11013060	Retina	4.66311e-08	0.000557	0.316755	0.0550155	0.016833	0.058086	SAME	0.899089	0.446135	chr7:99959594	FALSE	FALSE
AMD EUR	chr7:100393925:C:T	chr7:100393925:C:T	T	C	rs7803454	0.122218	0.122218	4.8e-09	99914532	100638465	723.933	453	mQTL	chr7:99959594:T:C	rs6962405	ENSG00000206717	Y_RNA	cg11013060	Retina	4.66311e-08	0.000557	0.316755	0.0550155	0.016833	0.058086	SAME	0.899089	0.446135	chr7:99959594	FALSE	FALSE
AMD EUR	chr7:100393925:C:T	chr7:100393925:C:T	T	C	rs7803454	0.122218	0.122218	4.8e-09	99914532	100638465	723.933	453	mQTL	chr7:99959594:T:C	rs6962405	ENSG00000206719	Y_RNA	cg11013060	Retina	4.66311e-08	0.000557	0.316755	0.0550155	0.016833	0.058086	SAME	0.899089	0.446135	chr7:99959594	FALSE	FALSE
AMD EUR	chr7:100393925:C:T	chr7:100393925:C:T	T	C	rs7803454	0.122218	0.122218	4.8e-09	99914532	100638465	723.933	453	mQTL	chr7:99959594:T:C	rs6962405	ENSG00000206721	Y_RNA	cg11013060	Retina	4.66311e-08	0.000557	0.316755	0.0550155	0.016833	0.058086	SAME	0.899089	0.446135	chr7:99959594	FALSE	FALSE
AMD EUR	chr7:100393925:C:T	chr7:100393925:C:T	T	C	rs7803454	0.122218	0.122218	4.8e-09	99914532	100638465	723.933	453	mQTL	chr7:99959594:T:C	rs6962405	ENSG00000206728	Y_RNA	cg11013060	Retina	4.66311e-08	0.000557	0.316755	0.0550155	0.016833	0.058086	SAME	0.899089	0.446135	chr7:99959594	FALSE	FALSE
AMD EUR	chr7:100393925:C:T	chr7:100393925:C:T	T	C	rs7803454	0.122218	0.122218	4.8e-09	99914532	100638465	723.933	453	mQTL	chr7:99959594:T:C	rs6962405	ENSG00000206734	Y_RNA	cg11013060	Retina	4.66311e-08	0.000557	0.316755	0.0550155	0.016833	0.058086	SAME	0.899089	0.446135	chr7:99959594	FALSE	FALSE
AMD EUR	chr7:100393925:C:T	chr7:100393925:C:T	T	C	rs7803454	0.122218	0.122218	4.8e-09	99914532	100638465	723.933	453	mQTL	chr7:99959594:T:C	rs6962405	ENSG00000206738	Y_RNA	cg11013060	Retina	4.66311e-08	0.000557	0.316755	0.0550155	0.016833	0.058086	SAME	0.899089	0.446135	chr7:99959594	FALSE	FALSE
AMD EUR	chr7:100393925:C:T	chr7:100393925:C:T	T	C	rs7803454	0.122218	0.122218	4.8e-09	99914532	100638465	723.933	453	mQTL	chr7:99959594:T:C	rs6962405	ENSG00000206739	Y_RNA	cg11013060	Retina	4.66311e-08	0.000557	0.316755	0.0550155	0.016833	0.058086	SAME	0.899089	0.446135	chr7:99959594	FALSE	FALSE
AMD EUR	chr7:100393925:C:T	chr7:100393925:C:T	T	C	rs7803454	0.122218	0.122218	4.8e-09	99914532	100638465	723.933	453	mQTL	chr7:99959594:T:C	rs6962405	ENSG00000206741	Y_RNA	cg11013060	Retina	4.66311e-08	0.000557	0.316755	0.0550155	0.016833	0.058086	SAME	0.899089	0.446135	chr7:99959594	FALSE	FALSE
AMD EUR	chr7:100393925:C:T	chr7:100393925:C:T	T	C	rs7803454	0.122218	0.122218	4.8e-09	99914532	100638465	723.933	453	mQTL	chr7:99959594:T:C	rs6962405	ENSG00000206751	Y_RNA	cg11013060	Retina	4.66311e-08	0.000557	0.316755	0.0550155	0.016833	0.058086	SAME	0.899089	0.446135	chr7:99959594	FALSE	FALSE
AMD EUR	chr7:100393925:C:T	chr7:100393925:C:T	T	C	rs7803454	0.122218	0.122218	4.8e-09	99914532	100638465	723.933	453	mQTL	chr7:99959594:T:C	rs6962405	ENSG00000206756	Y_RNA	cg11013060	Retina	4.66311e-08	0.000557	0.316755	0.0550155	0.016833	0.058086	SAME	0.899089	0.446135	chr7:99959594	FALSE	FALSE
AMD EUR	chr7:100393925:C:T	chr7:100393925:C:T	T	C	rs7803454	0.122218	0.122218	4.8e-09	99914532	100638465	723.933	453	mQTL	chr7:99959594:T:C	rs6962405	ENSG00000206768	Y_RNA	cg11013060	Retina	4.66311e-08	0.000557	0.316755	0.0550155	0.016833	0.058086	SAME	0.899089	0.446135	chr7:99959594	FALSE	FALSE
AMD EUR	chr7:100393925:C:T	chr7:100393925:C:T	T	C	rs7803454	0.122218	0.122218	4.8e-09	99914532	100638465	723.933	453	mQTL	chr7:99959594:T:C	rs6962405	ENSG00000206770	Y_RNA	cg11013060	Retina	4.66311e-08	0.000557	0.316755	0.0550155	0.016833	0.058086	SAME	0.899089	0.446135	chr7:99959594	FALSE	FALSE
AMD EUR	chr7:100393925:C:T	chr7:100393925:C:T	T	C	rs7803454	0.122218	0.122218	4.8e-09	99914532	100638465	723.933	453	mQTL	chr7:99959594:T:C	rs6962405	ENSG00000206779	Y_RNA	cg11013060	Retina	4.66311e-08	0.000557	0.316755	0.0550155	0.016833	0.058086	SAME	0.899089	0.446135	chr7:99959594	FALSE	FALSE
AMD EUR	chr7:100393925:C:T	chr7:100393925:C:T	T	C	rs7803454	0.122218	0.122218	4.8e-09	99914532	100638465	723.933	453	mQTL	chr7:99959594:T:C	rs6962405	ENSG00000206781	Y_RNA	cg11013060	Retina	4.66311e-08	0.000557	0.316755	0.0550155	0.016833	0.058086	SAME	0.899089	0.446135	chr7:99959594	FALSE	FALSE
AMD EUR	chr7:100393925:C:T	chr7:100393925:C:T	T	C	rs7803454	0.122218	0.122218	4.8e-09	99914532	100638465	723.933	453	mQTL	chr7:99959594:T:C	rs6962405	ENSG00000206784	Y_RNA	cg11013060	Retina	4.66311e-08	0.000557	0.316755	0.0550155	0.016833	0.058086	SAME	0.899089	0.446135	chr7:99959594	FALSE	FALSE
AMD EUR	chr7:100393925:C:T	chr7:100393925:C:T	T	C	rs7803454	0.122218	0.122218	4.8e-09	99914532	100638465	723.933	453	mQTL	chr7:99959594:T:C	rs6962405	ENSG00000206790	Y_RNA	cg11013060	Retina	4.66311e-08	0.000557	0.316755	0.0550155	0.016833	0.058086	SAME	0.899089	0.446135	chr7:99959594	FALSE	FALSE
AMD EUR	chr7:100393925:C:T	chr7:100393925:C:T	T	C	rs7803454	0.122218	0.122218	4.8e-09	99914532	100638465	723.933	453	mQTL	chr7:99959594:T:C	rs6962405	ENSG00000206792	Y_RNA	cg11013060	Retina	4.66311e-08	0.000557	0.316755	0.0550155	0.016833	0.058086	SAME	0.899089	0.446135	chr7:99959594	FALSE	FALSE
AMD EUR	chr7:100393925:C:T	chr7:100393925:C:T	T	C	rs7803454	0.122218	0.122218	4.8e-09	99914532	100638465	723.933	453	mQTL	chr7:99959594:T:C	rs6962405	ENSG00000206795	Y_RNA	cg11013060	Retina	4.66311e-08	0.000557	0.316755	0.0550155	0.016833	0.058086	SAME	0.899089	0.446135	chr7:99959594	FALSE	FALSE
AMD EUR	chr7:100393925:C:T	chr7:100393925:C:T	T	C	rs7803454	0.122218	0.122218	4.8e-09	99914532	100638465	723.933	453	mQTL	chr7:99959594:T:C	rs6962405	ENSG00000206797	Y_RNA	cg11013060	Retina	4.66311e-08	0.000557	0.316755	0.0550155	0.016833	0.058086	SAME	0.899089	0.446135	chr7:99959594	FALSE	FALSE
AMD EUR	chr7:100393925:C:T	chr7:100393925:C:T	T	C	rs7803454	0.122218	0.122218	4.8e-09	99914532	100638465	723.933	453	mQTL	chr7:99959594:T:C	rs6962405	ENSG00000206805	Y_RNA	cg11013060	Retina	4.66311e-08	0.000557	0.316755	0.0550155	0.016833	0.058086	SAME	0.899089	0.446135	chr7:99959594	FALSE	FALSE
AMD EUR	chr7:100393925:C:T	chr7:100393925:C:T	T	C	rs7803454	0.122218	0.122218	4.8e-09	99914532	100638465	723.933	453	mQTL	chr7:99959594:T:C	rs6962405	ENSG00000206806	Y_RNA	cg11013060	Retina	4.66311e-08	0.000557	0.316755	0.0550155	0.016833	0.058086	SAME	0.899089	0.446135	chr7:99959594	FALSE	FALSE
AMD EUR	chr7:100393925:C:T	chr7:100393925:C:T	T	C	rs7803454	0.122218	0.122218	4.8e-09	99914532	100638465	723.933	453	mQTL	chr7:99959594:T:C	rs6962405	ENSG00000206808	Y_RNA	cg11013060	Retina	4.66311e-08	0.000557	0.316755	0.0550155	0.016833	0.058086	SAME	0.899089	0.446135	chr7:99959594	FALSE	FALSE
AMD EUR	chr7:100393925:C:T	chr7:100393925:C:T	T	C	rs7803454	0.122218	0.122218	4.8e-09	99914532	100638465	723.933	453	mQTL	chr7:99959594:T:C	rs6962405	ENSG00000206813	Y_RNA	cg11013060	Retina	4.66311e-08	0.000557	0.316755	0.0550155	0.016833	0.058086	SAME	0.899089	0.446135	chr7:99959594	FALSE	FALSE
AMD EUR	chr7:100393925:C:T	chr7:100393925:C:T	T	C	rs7803454	0.122218	0.122218	4.8e-09	99914532	100638465	723.933	453	mQTL	chr7:99959594:T:C	rs6962405	ENSG00000206814	Y_RNA	cg11013060	Retina	4.66311e-08	0.000557	0.316755	0.0550155	0.016833	0.058086	SAME	0.899089	0.446135	chr7:99959594	FALSE	FALSE
AMD EUR	chr7:100393925:C:T	chr7:100393925:C:T	T	C	rs7803454	0.122218	0.122218	4.8e-09	99914532	100638465	723.933	453	mQTL	chr7:99959594:T:C	rs6962405	ENSG00000206816	Y_RNA	cg11013060	Retina	4.66311e-08	0.000557	0.316755	0.0550155	0.016833	0.058086	SAME	0.899089	0.446135	chr7:99959594	FALSE	FALSE
AMD EUR	chr7:100393925:C:T	chr7:100393925:C:T	T	C	rs7803454	0.122218	0.122218	4.8e-09	99914532	100638465	723.933	453	mQTL	chr7:99959594:T:C	rs6962405	ENSG00000206817	Y_RNA	cg11013060	Retina	4.66311e-08	0.000557	0.316755	0.0550155	0.016833	0.058086	SAME	0.899089	0.446135	chr7:99959594	FALSE	FALSE
AMD EUR	chr7:100393925:C:T	chr7:100393925:C:T	T	C	rs7803454	0.122218	0.122218	4.8e-09	99914532	100638465	723.933	453	mQTL	chr7:99959594:T:C	rs6962405	ENSG00000206822	Y_RNA	cg11013060	Retina	4.66311e-08	0.000557	0.316755	0.0550155	0.016833	0.058086	SAME	0.899089	0.446135	chr7:99959594	FALSE	FALSE
AMD EUR	chr7:100393925:C:T	chr7:100393925:C:T	T	C	rs7803454	0.122218	0.122218	4.8e-09	99914532	100638465	723.933	453	mQTL	chr7:99959594:T:C	rs6962405	ENSG00000206824	Y_RNA	cg11013060	Retina	4.66311e-08	0.000557	0.316755	0.0550155	0.016833	0.058086	SAME	0.899089	0.446135	chr7:99959594	FALSE	FALSE
AMD EUR	chr7:100393925:C:T	chr7:100393925:C:T	T	C	rs7803454	0.122218	0.122218	4.8e-09	99914532	100638465	723.933	453	mQTL	chr7:99959594:T:C	rs6962405	ENSG00000206840	Y_RNA	cg11013060	Retina	4.66311e-08	0.000557	0.316755	0.0550155	0.016833	0.058086	SAME	0.899089	0.446135	chr7:99959594	FALSE	FALSE
AMD EUR	chr7:100393925:C:T	chr7:100393925:C:T	T	C	rs7803454	0.122218	0.122218	4.8e-09	99914532	100638465	723.933	453	mQTL	chr7:99959594:T:C	rs6962405	ENSG00000206844	Y_RNA	cg11013060	Retina	4.66311e-08	0.000557	0.316755	0.0550155	0.016833	0.058086	SAME	0.899089	0.446135	chr7:99959594	FALSE	FALSE
AMD EUR	chr7:100393925:C:T	chr7:100393925:C:T	T	C	rs7803454	0.122218	0.122218	4.8e-09	99914532	100638465	723.933	453	mQTL	chr7:99959594:T:C	rs6962405	ENSG00000206846	Y_RNA	cg11013060	Retina	4.66311e-08	0.000557	0.316755	0.0550155	0.016833	0.058086	SAME	0.899089	0.446135	chr7:99959594	FALSE	FALSE
AMD EUR	chr7:100393925:C:T	chr7:100393925:C:T	T	C	rs7803454	0.122218	0.122218	4.8e-09	99914532	100638465	723.933	453	mQTL	chr7:99959594:T:C	rs6962405	ENSG00000206847	Y_RNA	cg11013060	Retina	4.66311e-08	0.000557	0.316755	0.0550155	0.016833	0.058086	SAME	0.899089	0.446135	chr7:99959594	FALSE	FALSE
AMD EUR	chr7:100393925:C:T	chr7:100393925:C:T	T	C	rs7803454	0.122218	0.122218	4.8e-09	99914532	100638465	723.933	453	mQTL	chr7:99959594:T:C	rs6962405	ENSG00000206850	Y_RNA	cg11013060	Retina	4.66311e-08	0.000557	0.316755	0.0550155	0.016833	0.058086	SAME	0.899089	0.446135	chr7:99959594	FALSE	FALSE
AMD EUR	chr7:100393925:C:T	chr7:100393925:C:T	T	C	rs7803454	0.122218	0.122218	4.8e-09	99914532	100638465	723.933	453	mQTL	chr7:99959594:T:C	rs6962405	ENSG00000206858	Y_RNA	cg11013060	Retina	4.66311e-08	0.000557	0.316755	0.0550155	0.016833	0.058086	SAME	0.899089	0.446135	chr7:99959594	FALSE	FALSE
AMD EUR	chr7:100393925:C:T	chr7:100393925:C:T	T	C	rs7803454	0.122218	0.122218	4.8e-09	99914532	100638465	723.933	453	mQTL	chr7:99959594:T:C	rs6962405	ENSG00000206862	Y_RNA	cg11013060	Retina	4.66311e-08	0.000557	0.316755	0.0550155	0.016833	0.058086	SAME	0.899089	0.446135	chr7:99959594	FALSE	FALSE
AMD EUR	chr7:100393925:C:T	chr7:100393925:C:T	T	C	rs7803454	0.122218	0.122218	4.8e-09	99914532	100638465	723.933	453	mQTL	chr7:99959594:T:C	rs6962405	ENSG00000206865	Y_RNA	cg11013060	Retina	4.66311e-08	0.000557	0.316755	0.0550155	0.016833	0.058086	SAME	0.899089	0.446135	chr7:99959594	FALSE	FALSE
AMD EUR	chr7:100393925:C:T	chr7:100393925:C:T	T	C	rs7803454	0.122218	0.122218	4.8e-09	99914532	100638465	723.933	453	mQTL	chr7:99959594:T:C	rs6962405	ENSG00000206895	Y_RNA	cg11013060	Retina	4.66311e-08	0.000557	0.316755	0.0550155	0.016833	0.058086	SAME	0.899089	0.446135	chr7:99959594	FALSE	FALSE
AMD EUR	chr7:100393925:C:T	chr7:100393925:C:T	T	C	rs7803454	0.122218	0.122218	4.8e-09	99914532	100638465	723.933	453	mQTL	chr7:99959594:T:C	rs6962405	ENSG00000206905	Y_RNA	cg11013060	Retina	4.66311e-08	0.000557	0.316755	0.0550155	0.016833	0.058086	SAME	0.899089	0.446135	chr7:99959594	FALSE	FALSE
AMD EUR	chr7:100393925:C:T	chr7:100393925:C:T	T	C	rs7803454	0.122218	0.122218	4.8e-09	99914532	100638465	723.933	453	mQTL	chr7:99959594:T:C	rs6962405	ENSG00000206911	Y_RNA	cg11013060	Retina	4.66311e-08	0.000557	0.316755	0.0550155	0.016833	0.058086	SAME	0.899089	0.446135	chr7:99959594	FALSE	FALSE
AMD EUR	chr7:100393925:C:T	chr7:100393925:C:T	T	C	rs7803454	0.122218	0.122218	4.8e-09	99914532	100638465	723.933	453	mQTL	chr7:99959594:T:C	rs6962405	ENSG00000206912	Y_RNA	cg11013060	Retina	4.66311e-08	0.000557	0.316755	0.0550155	0.016833	0.058086	SAME	0.899089	0.446135	chr7:99959594	FALSE	FALSE
AMD EUR	chr7:100393925:C:T	chr7:100393925:C:T	T	C	rs7803454	0.122218	0.122218	4.8e-09	99914532	100638465	723.933	453	mQTL	chr7:99959594:T:C	rs6962405	ENSG00000206914	Y_RNA	cg11013060	Retina	4.66311e-08	0.000557	0.316755	0.0550155	0.016833	0.058086	SAME	0.899089	0.446135	chr7:99959594	FALSE	FALSE
AMD EUR	chr7:100393925:C:T	chr7:100393925:C:T	T	C	rs7803454	0.122218	0.122218	4.8e-09	99914532	100638465	723.933	453	mQTL	chr7:99959594:T:C	rs6962405	ENSG00000206925	Y_RNA	cg11013060	Retina	4.66311e-08	0.000557	0.316755	0.0550155	0.016833	0.058086	SAME	0.899089	0.446135	chr7:99959594	FALSE	FALSE
AMD EUR	chr7:100393925:C:T	chr7:100393925:C:T	T	C	rs7803454	0.122218	0.122218	4.8e-09	99914532	100638465	723.933	453	mQTL	chr7:99959594:T:C	rs6962405	ENSG00000206927	Y_RNA	cg11013060	Retina	4.66311e-08	0.000557	0.316755	0.0550155	0.016833	0.058086	SAME	0.899089	0.446135	chr7:99959594	FALSE	FALSE
AMD EUR	chr7:100393925:C:T	chr7:100393925:C:T	T	C	rs7803454	0.122218	0.122218	4.8e-09	99914532	100638465	723.933	453	mQTL	chr7:99959594:T:C	rs6962405	ENSG00000206929	Y_RNA	cg11013060	Retina	4.66311e-08	0.000557	0.316755	0.0550155	0.016833	0.058086	SAME	0.899089	0.446135	chr7:99959594	FALSE	FALSE
AMD EUR	chr7:100393925:C:T	chr7:100393925:C:T	T	C	rs7803454	0.122218	0.122218	4.8e-09	99914532	100638465	723.933	453	mQTL	chr7:99959594:T:C	rs6962405	ENSG00000206950	Y_RNA	cg11013060	Retina	4.66311e-08	0.000557	0.316755	0.0550155	0.016833	0.058086	SAME	0.899089	0.446135	chr7:99959594	FALSE	FALSE
AMD EUR	chr7:100393925:C:T	chr7:100393925:C:T	T	C	rs7803454	0.122218	0.122218	4.8e-09	99914532	100638465	723.933	453	mQTL	chr7:99959594:T:C	rs6962405	ENSG00000206951	Y_RNA	cg11013060	Retina	4.66311e-08	0.000557	0.316755	0.0550155	0.016833	0.058086	SAME	0.899089	0.446135	chr7:99959594	FALSE	FALSE
AMD EUR	chr7:100393925:C:T	chr7:100393925:C:T	T	C	rs7803454	0.122218	0.122218	4.8e-09	99914532	100638465	723.933	453	mQTL	chr7:99959594:T:C	rs6962405	ENSG00000206957	Y_RNA	cg11013060	Retina	4.66311e-08	0.000557	0.316755	0.0550155	0.016833	0.058086	SAME	0.899089	0.446135	chr7:99959594	FALSE	FALSE
AMD EUR	chr7:100393925:C:T	chr7:100393925:C:T	T	C	rs7803454	0.122218	0.122218	4.8e-09	99914532	100638465	723.933	453	mQTL	chr7:99959594:T:C	rs6962405	ENSG00000206959	Y_RNA	cg11013060	Retina	4.66311e-08	0.000557	0.316755	0.0550155	0.016833	0.058086	SAME	0.899089	0.446135	chr7:99959594	FALSE	FALSE
AMD EUR	chr7:100393925:C:T	chr7:100393925:C:T	T	C	rs7803454	0.122218	0.122218	4.8e-09	99914532	100638465	723.933	453	mQTL	chr7:99959594:T:C	rs6962405	ENSG00000206964	Y_RNA	cg11013060	Retina	4.66311e-08	0.000557	0.316755	0.0550155	0.016833	0.058086	SAME	0.899089	0.446135	chr7:99959594	FALSE	FALSE
AMD EUR	chr7:100393925:C:T	chr7:100393925:C:T	T	C	rs7803454	0.122218	0.122218	4.8e-09	99914532	100638465	723.933	453	mQTL	chr7:99959594:T:C	rs6962405	ENSG00000206967	Y_RNA	cg11013060	Retina	4.66311e-08	0.000557	0.316755	0.0550155	0.016833	0.058086	SAME	0.899089	0.446135	chr7:99959594	FALSE	FALSE
AMD EUR	chr7:100393925:C:T	chr7:100393925:C:T	T	C	rs7803454	0.122218	0.122218	4.8e-09	99914532	100638465	723.933	453	mQTL	chr7:99959594:T:C	rs6962405	ENSG00000206978	Y_RNA	cg11013060	Retina	4.66311e-08	0.000557	0.316755	0.0550155	0.016833	0.058086	SAME	0.899089	0.446135	chr7:99959594	FALSE	FALSE
AMD EUR	chr7:100393925:C:T	chr7:100393925:C:T	T	C	rs7803454	0.122218	0.122218	4.8e-09	99914532	100638465	723.933	453	mQTL	chr7:99959594:T:C	rs6962405	ENSG00000206982	Y_RNA	cg11013060	Retina	4.66311e-08	0.000557	0.316755	0.0550155	0.016833	0.058086	SAME	0.899089	0.446135	chr7:99959594	FALSE	FALSE
AMD EUR	chr7:100393925:C:T	chr7:100393925:C:T	T	C	rs7803454	0.122218	0.122218	4.8e-09	99914532	100638465	723.933	453	mQTL	chr7:99959594:T:C	rs6962405	ENSG00000206990	Y_RNA	cg11013060	Retina	4.66311e-08	0.000557	0.316755	0.0550155	0.016833	0.058086	SAME	0.899089	0.446135	chr7:99959594	FALSE	FALSE
AMD EUR	chr7:100393925:C:T	chr7:100393925:C:T	T	C	rs7803454	0.122218	0.122218	4.8e-09	99914532	100638465	723.933	453	mQTL	chr7:99959594:T:C	rs6962405	ENSG00000206995	Y_RNA	cg11013060	Retina	4.66311e-08	0.000557	0.316755	0.0550155	0.016833	0.058086	SAME	0.899089	0.446135	chr7:99959594	FALSE	FALSE
AMD EUR	chr7:100393925:C:T	chr7:100393925:C:T	T	C	rs7803454	0.122218	0.122218	4.8e-09	99914532	100638465	723.933	453	mQTL	chr7:99959594:T:C	rs6962405	ENSG00000206998	Y_RNA	cg11013060	Retina	4.66311e-08	0.000557	0.316755	0.0550155	0.016833	0.058086	SAME	0.899089	0.446135	chr7:99959594	FALSE	FALSE
AMD EUR	chr7:100393925:C:T	chr7:100393925:C:T	T	C	rs7803454	0.122218	0.122218	4.8e-09	99914532	100638465	723.933	453	mQTL	chr7:99959594:T:C	rs6962405	ENSG00000207009	Y_RNA	cg11013060	Retina	4.66311e-08	0.000557	0.316755	0.0550155	0.016833	0.058086	SAME	0.899089	0.446135	chr7:99959594	FALSE	FALSE
AMD EUR	chr7:100393925:C:T	chr7:100393925:C:T	T	C	rs7803454	0.122218	0.122218	4.8e-09	99914532	100638465	723.933	453	mQTL	chr7:99959594:T:C	rs6962405	ENSG00000207020	Y_RNA	cg11013060	Retina	4.66311e-08	0.000557	0.316755	0.0550155	0.016833	0.058086	SAME	0.899089	0.446135	chr7:99959594	FALSE	FALSE
AMD EUR	chr7:100393925:C:T	chr7:100393925:C:T	T	C	rs7803454	0.122218	0.122218	4.8e-09	99914532	100638465	723.933	453	mQTL	chr7:99959594:T:C	rs6962405	ENSG00000207021	Y_RNA	cg11013060	Retina	4.66311e-08	0.000557	0.316755	0.0550155	0.016833	0.058086	SAME	0.899089	0.446135	chr7:99959594	FALSE	FALSE
AMD EUR	chr7:100393925:C:T	chr7:100393925:C:T	T	C	rs7803454	0.122218	0.122218	4.8e-09	99914532	100638465	723.933	453	mQTL	chr7:99959594:T:C	rs6962405	ENSG00000207024	Y_RNA	cg11013060	Retina	4.66311e-08	0.000557	0.316755	0.0550155	0.016833	0.058086	SAME	0.899089	0.446135	chr7:99959594	FALSE	FALSE
AMD EUR	chr7:100393925:C:T	chr7:100393925:C:T	T	C	rs7803454	0.122218	0.122218	4.8e-09	99914532	100638465	723.933	453	mQTL	chr7:99959594:T:C	rs6962405	ENSG00000207025	Y_RNA	cg11013060	Retina	4.66311e-08	0.000557	0.316755	0.0550155	0.016833	0.058086	SAME	0.899089	0.446135	chr7:99959594	FALSE	FALSE
AMD EUR	chr7:100393925:C:T	chr7:100393925:C:T	T	C	rs7803454	0.122218	0.122218	4.8e-09	99914532	100638465	723.933	453	mQTL	chr7:99959594:T:C	rs6962405	ENSG00000207032	Y_RNA	cg11013060	Retina	4.66311e-08	0.000557	0.316755	0.0550155	0.016833	0.058086	SAME	0.899089	0.446135	chr7:99959594	FALSE	FALSE
AMD EUR	chr7:100393925:C:T	chr7:100393925:C:T	T	C	rs7803454	0.122218	0.122218	4.8e-09	99914532	100638465	723.933	453	mQTL	chr7:99959594:T:C	rs6962405	ENSG00000207034	Y_RNA	cg11013060	Retina	4.66311e-08	0.000557	0.316755	0.0550155	0.016833	0.058086	SAME	0.899089	0.446135	chr7:99959594	FALSE	FALSE
AMD EUR	chr7:100393925:C:T	chr7:100393925:C:T	T	C	rs7803454	0.122218	0.122218	4.8e-09	99914532	100638465	723.933	453	mQTL	chr7:99959594:T:C	rs6962405	ENSG00000207039	Y_RNA	cg11013060	Retina	4.66311e-08	0.000557	0.316755	0.0550155	0.016833	0.058086	SAME	0.899089	0.446135	chr7:99959594	FALSE	FALSE
AMD EUR	chr7:100393925:C:T	chr7:100393925:C:T	T	C	rs7803454	0.122218	0.122218	4.8e-09	99914532	100638465	723.933	453	mQTL	chr7:99959594:T:C	rs6962405	ENSG00000207049	Y_RNA	cg11013060	Retina	4.66311e-08	0.000557	0.316755	0.0550155	0.016833	0.058086	SAME	0.899089	0.446135	chr7:99959594	FALSE	FALSE
AMD EUR	chr7:100393925:C:T	chr7:100393925:C:T	T	C	rs7803454	0.122218	0.122218	4.8e-09	99914532	100638465	723.933	453	mQTL	chr7:99959594:T:C	rs6962405	ENSG00000207061	Y_RNA	cg11013060	Retina	4.66311e-08	0.000557	0.316755	0.0550155	0.016833	0.058086	SAME	0.899089	0.446135	chr7:99959594	FALSE	FALSE
AMD EUR	chr7:100393925:C:T	chr7:100393925:C:T	T	C	rs7803454	0.122218	0.122218	4.8e-09	99914532	100638465	723.933	453	mQTL	chr7:99959594:T:C	rs6962405	ENSG00000207069	Y_RNA	cg11013060	Retina	4.66311e-08	0.000557	0.316755	0.0550155	0.016833	0.058086	SAME	0.899089	0.446135	chr7:99959594	FALSE	FALSE
AMD EUR	chr7:100393925:C:T	chr7:100393925:C:T	T	C	rs7803454	0.122218	0.122218	4.8e-09	99914532	100638465	723.933	453	mQTL	chr7:99959594:T:C	rs6962405	ENSG00000207073	Y_RNA	cg11013060	Retina	4.66311e-08	0.000557	0.316755	0.0550155	0.016833	0.058086	SAME	0.899089	0.446135	chr7:99959594	FALSE	FALSE
AMD EUR	chr7:100393925:C:T	chr7:100393925:C:T	T	C	rs7803454	0.122218	0.122218	4.8e-09	99914532	100638465	723.933	453	mQTL	chr7:99959594:T:C	rs6962405	ENSG00000207075	Y_RNA	cg11013060	Retina	4.66311e-08	0.000557	0.316755	0.0550155	0.016833	0.058086	SAME	0.899089	0.446135	chr7:99959594	FALSE	FALSE
AMD EUR	chr7:100393925:C:T	chr7:100393925:C:T	T	C	rs7803454	0.122218	0.122218	4.8e-09	99914532	100638465	723.933	453	mQTL	chr7:99959594:T:C	rs6962405	ENSG00000207080	Y_RNA	cg11013060	Retina	4.66311e-08	0.000557	0.316755	0.0550155	0.016833	0.058086	SAME	0.899089	0.446135	chr7:99959594	FALSE	FALSE
AMD EUR	chr7:100393925:C:T	chr7:100393925:C:T	T	C	rs7803454	0.122218	0.122218	4.8e-09	99914532	100638465	723.933	453	mQTL	chr7:99959594:T:C	rs6962405	ENSG00000207086	Y_RNA	cg11013060	Retina	4.66311e-08	0.000557	0.316755	0.0550155	0.016833	0.058086	SAME	0.899089	0.446135	chr7:99959594	FALSE	FALSE
AMD EUR	chr7:100393925:C:T	chr7:100393925:C:T	T	C	rs7803454	0.122218	0.122218	4.8e-09	99914532	100638465	723.933	453	mQTL	chr7:99959594:T:C	rs6962405	ENSG00000207091	Y_RNA	cg11013060	Retina	4.66311e-08	0.000557	0.316755	0.0550155	0.016833	0.058086	SAME	0.899089	0.446135	chr7:99959594	FALSE	FALSE
AMD EUR	chr7:100393925:C:T	chr7:100393925:C:T	T	C	rs7803454	0.122218	0.122218	4.8e-09	99914532	100638465	723.933	453	mQTL	chr7:99959594:T:C	rs6962405	ENSG00000207092	Y_RNA	cg11013060	Retina	4.66311e-08	0.000557	0.316755	0.0550155	0.016833	0.058086	SAME	0.899089	0.446135	chr7:99959594	FALSE	FALSE
AMD EUR	chr7:100393925:C:T	chr7:100393925:C:T	T	C	rs7803454	0.122218	0.122218	4.8e-09	99914532	100638465	723.933	453	mQTL	chr7:99959594:T:C	rs6962405	ENSG00000207101	Y_RNA	cg11013060	Retina	4.66311e-08	0.000557	0.316755	0.0550155	0.016833	0.058086	SAME	0.899089	0.446135	chr7:99959594	FALSE	FALSE
AMD EUR	chr7:100393925:C:T	chr7:100393925:C:T	T	C	rs7803454	0.122218	0.122218	4.8e-09	99914532	100638465	723.933	453	mQTL	chr7:99959594:T:C	rs6962405	ENSG00000207105	Y_RNA	cg11013060	Retina	4.66311e-08	0.000557	0.316755	0.0550155	0.016833	0.058086	SAME	0.899089	0.446135	chr7:99959594	FALSE	FALSE
AMD EUR	chr7:100393925:C:T	chr7:100393925:C:T	T	C	rs7803454	0.122218	0.122218	4.8e-09	99914532	100638465	723.933	453	mQTL	chr7:99959594:T:C	rs6962405	ENSG00000207108	Y_RNA	cg11013060	Retina	4.66311e-08	0.000557	0.316755	0.0550155	0.016833	0.058086	SAME	0.899089	0.446135	chr7:99959594	FALSE	FALSE
AMD EUR	chr7:100393925:C:T	chr7:100393925:C:T	T	C	rs7803454	0.122218	0.122218	4.8e-09	99914532	100638465	723.933	453	mQTL	chr7:99959594:T:C	rs6962405	ENSG00000207117	Y_RNA	cg11013060	Retina	4.66311e-08	0.000557	0.316755	0.0550155	0.016833	0.058086	SAME	0.899089	0.446135	chr7:99959594	FALSE	FALSE
AMD EUR	chr7:100393925:C:T	chr7:100393925:C:T	T	C	rs7803454	0.122218	0.122218	4.8e-09	99914532	100638465	723.933	453	mQTL	chr7:99959594:T:C	rs6962405	ENSG00000207123	Y_RNA	cg11013060	Retina	4.66311e-08	0.000557	0.316755	0.0550155	0.016833	0.058086	SAME	0.899089	0.446135	chr7:99959594	FALSE	FALSE
AMD EUR	chr7:100393925:C:T	chr7:100393925:C:T	T	C	rs7803454	0.122218	0.122218	4.8e-09	99914532	100638465	723.933	453	mQTL	chr7:99959594:T:C	rs6962405	ENSG00000207127	Y_RNA	cg11013060	Retina	4.66311e-08	0.000557	0.316755	0.0550155	0.016833	0.058086	SAME	0.899089	0.446135	chr7:99959594	FALSE	FALSE
AMD EUR	chr7:100393925:C:T	chr7:100393925:C:T	T	C	rs7803454	0.122218	0.122218	4.8e-09	99914532	100638465	723.933	453	mQTL	chr7:99959594:T:C	rs6962405	ENSG00000207131	Y_RNA	cg11013060	Retina	4.66311e-08	0.000557	0.316755	0.0550155	0.016833	0.058086	SAME	0.899089	0.446135	chr7:99959594	FALSE	FALSE
AMD EUR	chr7:100393925:C:T	chr7:100393925:C:T	T	C	rs7803454	0.122218	0.122218	4.8e-09	99914532	100638465	723.933	453	mQTL	chr7:99959594:T:C	rs6962405	ENSG00000207132	Y_RNA	cg11013060	Retina	4.66311e-08	0.000557	0.316755	0.0550155	0.016833	0.058086	SAME	0.899089	0.446135	chr7:99959594	FALSE	FALSE
AMD EUR	chr7:100393925:C:T	chr7:100393925:C:T	T	C	rs7803454	0.122218	0.122218	4.8e-09	99914532	100638465	723.933	453	mQTL	chr7:99959594:T:C	rs6962405	ENSG00000207139	Y_RNA	cg11013060	Retina	4.66311e-08	0.000557	0.316755	0.0550155	0.016833	0.058086	SAME	0.899089	0.446135	chr7:99959594	FALSE	FALSE
AMD EUR	chr7:100393925:C:T	chr7:100393925:C:T	T	C	rs7803454	0.122218	0.122218	4.8e-09	99914532	100638465	723.933	453	mQTL	chr7:99959594:T:C	rs6962405	ENSG00000207142	Y_RNA	cg11013060	Retina	4.66311e-08	0.000557	0.316755	0.0550155	0.016833	0.058086	SAME	0.899089	0.446135	chr7:99959594	FALSE	FALSE
AMD EUR	chr7:100393925:C:T	chr7:100393925:C:T	T	C	rs7803454	0.122218	0.122218	4.8e-09	99914532	100638465	723.933	453	mQTL	chr7:99959594:T:C	rs6962405	ENSG00000207146	Y_RNA	cg11013060	Retina	4.66311e-08	0.000557	0.316755	0.0550155	0.016833	0.058086	SAME	0.899089	0.446135	chr7:99959594	FALSE	FALSE
AMD EUR	chr7:100393925:C:T	chr7:100393925:C:T	T	C	rs7803454	0.122218	0.122218	4.8e-09	99914532	100638465	723.933	453	mQTL	chr7:99959594:T:C	rs6962405	ENSG00000207148	Y_RNA	cg11013060	Retina	4.66311e-08	0.000557	0.316755	0.0550155	0.016833	0.058086	SAME	0.899089	0.446135	chr7:99959594	FALSE	FALSE
AMD EUR	chr7:100393925:C:T	chr7:100393925:C:T	T	C	rs7803454	0.122218	0.122218	4.8e-09	99914532	100638465	723.933	453	mQTL	chr7:99959594:T:C	rs6962405	ENSG00000207151	Y_RNA	cg11013060	Retina	4.66311e-08	0.000557	0.316755	0.0550155	0.016833	0.058086	SAME	0.899089	0.446135	chr7:99959594	FALSE	FALSE
AMD EUR	chr7:100393925:C:T	chr7:100393925:C:T	T	C	rs7803454	0.122218	0.122218	4.8e-09	99914532	100638465	723.933	453	mQTL	chr7:99959594:T:C	rs6962405	ENSG00000207161	Y_RNA	cg11013060	Retina	4.66311e-08	0.000557	0.316755	0.0550155	0.016833	0.058086	SAME	0.899089	0.446135	chr7:99959594	FALSE	FALSE
AMD EUR	chr7:100393925:C:T	chr7:100393925:C:T	T	C	rs7803454	0.122218	0.122218	4.8e-09	99914532	100638465	723.933	453	mQTL	chr7:99959594:T:C	rs6962405	ENSG00000207164	Y_RNA	cg11013060	Retina	4.66311e-08	0.000557	0.316755	0.0550155	0.016833	0.058086	SAME	0.899089	0.446135	chr7:99959594	FALSE	FALSE
AMD EUR	chr7:100393925:C:T	chr7:100393925:C:T	T	C	rs7803454	0.122218	0.122218	4.8e-09	99914532	100638465	723.933	453	mQTL	chr7:99959594:T:C	rs6962405	ENSG00000207173	Y_RNA	cg11013060	Retina	4.66311e-08	0.000557	0.316755	0.0550155	0.016833	0.058086	SAME	0.899089	0.446135	chr7:99959594	FALSE	FALSE
AMD EUR	chr7:100393925:C:T	chr7:100393925:C:T	T	C	rs7803454	0.122218	0.122218	4.8e-09	99914532	100638465	723.933	453	mQTL	chr7:99959594:T:C	rs6962405	ENSG00000207176	Y_RNA	cg11013060	Retina	4.66311e-08	0.000557	0.316755	0.0550155	0.016833	0.058086	SAME	0.899089	0.446135	chr7:99959594	FALSE	FALSE
AMD EUR	chr7:100393925:C:T	chr7:100393925:C:T	T	C	rs7803454	0.122218	0.122218	4.8e-09	99914532	100638465	723.933	453	mQTL	chr7:99959594:T:C	rs6962405	ENSG00000207189	Y_RNA	cg11013060	Retina	4.66311e-08	0.000557	0.316755	0.0550155	0.016833	0.058086	SAME	0.899089	0.446135	chr7:99959594	FALSE	FALSE
AMD EUR	chr7:100393925:C:T	chr7:100393925:C:T	T	C	rs7803454	0.122218	0.122218	4.8e-09	99914532	100638465	723.933	453	mQTL	chr7:99959594:T:C	rs6962405	ENSG00000207193	Y_RNA	cg11013060	Retina	4.66311e-08	0.000557	0.316755	0.0550155	0.016833	0.058086	SAME	0.899089	0.446135	chr7:99959594	FALSE	FALSE
AMD EUR	chr7:100393925:C:T	chr7:100393925:C:T	T	C	rs7803454	0.122218	0.122218	4.8e-09	99914532	100638465	723.933	453	mQTL	chr7:99959594:T:C	rs6962405	ENSG00000207195	Y_RNA	cg11013060	Retina	4.66311e-08	0.000557	0.316755	0.0550155	0.016833	0.058086	SAME	0.899089	0.446135	chr7:99959594	FALSE	FALSE
AMD EUR	chr7:100393925:C:T	chr7:100393925:C:T	T	C	rs7803454	0.122218	0.122218	4.8e-09	99914532	100638465	723.933	453	mQTL	chr7:99959594:T:C	rs6962405	ENSG00000207196	Y_RNA	cg11013060	Retina	4.66311e-08	0.000557	0.316755	0.0550155	0.016833	0.058086	SAME	0.899089	0.446135	chr7:99959594	FALSE	FALSE
AMD EUR	chr7:100393925:C:T	chr7:100393925:C:T	T	C	rs7803454	0.122218	0.122218	4.8e-09	99914532	100638465	723.933	453	mQTL	chr7:99959594:T:C	rs6962405	ENSG00000207207	Y_RNA	cg11013060	Retina	4.66311e-08	0.000557	0.316755	0.0550155	0.016833	0.058086	SAME	0.899089	0.446135	chr7:99959594	FALSE	FALSE
AMD EUR	chr7:100393925:C:T	chr7:100393925:C:T	T	C	rs7803454	0.122218	0.122218	4.8e-09	99914532	100638465	723.933	453	mQTL	chr7:99959594:T:C	rs6962405	ENSG00000207209	Y_RNA	cg11013060	Retina	4.66311e-08	0.000557	0.316755	0.0550155	0.016833	0.058086	SAME	0.899089	0.446135	chr7:99959594	FALSE	FALSE
AMD EUR	chr7:100393925:C:T	chr7:100393925:C:T	T	C	rs7803454	0.122218	0.122218	4.8e-09	99914532	100638465	723.933	453	mQTL	chr7:99959594:T:C	rs6962405	ENSG00000207210	Y_RNA	cg11013060	Retina	4.66311e-08	0.000557	0.316755	0.0550155	0.016833	0.058086	SAME	0.899089	0.446135	chr7:99959594	FALSE	FALSE
AMD EUR	chr7:100393925:C:T	chr7:100393925:C:T	T	C	rs7803454	0.122218	0.122218	4.8e-09	99914532	100638465	723.933	453	mQTL	chr7:99959594:T:C	rs6962405	ENSG00000207218	Y_RNA	cg11013060	Retina	4.66311e-08	0.000557	0.316755	0.0550155	0.016833	0.058086	SAME	0.899089	0.446135	chr7:99959594	FALSE	FALSE
AMD EUR	chr7:100393925:C:T	chr7:100393925:C:T	T	C	rs7803454	0.122218	0.122218	4.8e-09	99914532	100638465	723.933	453	mQTL	chr7:99959594:T:C	rs6962405	ENSG00000207223	Y_RNA	cg11013060	Retina	4.66311e-08	0.000557	0.316755	0.0550155	0.016833	0.058086	SAME	0.899089	0.446135	chr7:99959594	FALSE	FALSE
AMD EUR	chr7:100393925:C:T	chr7:100393925:C:T	T	C	rs7803454	0.122218	0.122218	4.8e-09	99914532	100638465	723.933	453	mQTL	chr7:99959594:T:C	rs6962405	ENSG00000207229	Y_RNA	cg11013060	Retina	4.66311e-08	0.000557	0.316755	0.0550155	0.016833	0.058086	SAME	0.899089	0.446135	chr7:99959594	FALSE	FALSE
AMD EUR	chr7:100393925:C:T	chr7:100393925:C:T	T	C	rs7803454	0.122218	0.122218	4.8e-09	99914532	100638465	723.933	453	mQTL	chr7:99959594:T:C	rs6962405	ENSG00000207231	Y_RNA	cg11013060	Retina	4.66311e-08	0.000557	0.316755	0.0550155	0.016833	0.058086	SAME	0.899089	0.446135	chr7:99959594	FALSE	FALSE
AMD EUR	chr7:100393925:C:T	chr7:100393925:C:T	T	C	rs7803454	0.122218	0.122218	4.8e-09	99914532	100638465	723.933	453	mQTL	chr7:99959594:T:C	rs6962405	ENSG00000207235	Y_RNA	cg11013060	Retina	4.66311e-08	0.000557	0.316755	0.0550155	0.016833	0.058086	SAME	0.899089	0.446135	chr7:99959594	FALSE	FALSE
AMD EUR	chr7:100393925:C:T	chr7:100393925:C:T	T	C	rs7803454	0.122218	0.122218	4.8e-09	99914532	100638465	723.933	453	mQTL	chr7:99959594:T:C	rs6962405	ENSG00000207240	Y_RNA	cg11013060	Retina	4.66311e-08	0.000557	0.316755	0.0550155	0.016833	0.058086	SAME	0.899089	0.446135	chr7:99959594	FALSE	FALSE
AMD EUR	chr7:100393925:C:T	chr7:100393925:C:T	T	C	rs7803454	0.122218	0.122218	4.8e-09	99914532	100638465	723.933	453	mQTL	chr7:99959594:T:C	rs6962405	ENSG00000207243	Y_RNA	cg11013060	Retina	4.66311e-08	0.000557	0.316755	0.0550155	0.016833	0.058086	SAME	0.899089	0.446135	chr7:99959594	FALSE	FALSE
AMD EUR	chr7:100393925:C:T	chr7:100393925:C:T	T	C	rs7803454	0.122218	0.122218	4.8e-09	99914532	100638465	723.933	453	mQTL	chr7:99959594:T:C	rs6962405	ENSG00000207247	Y_RNA	cg11013060	Retina	4.66311e-08	0.000557	0.316755	0.0550155	0.016833	0.058086	SAME	0.899089	0.446135	chr7:99959594	FALSE	FALSE
AMD EUR	chr7:100393925:C:T	chr7:100393925:C:T	T	C	rs7803454	0.122218	0.122218	4.8e-09	99914532	100638465	723.933	453	mQTL	chr7:99959594:T:C	rs6962405	ENSG00000207252	Y_RNA	cg11013060	Retina	4.66311e-08	0.000557	0.316755	0.0550155	0.016833	0.058086	SAME	0.899089	0.446135	chr7:99959594	FALSE	FALSE
AMD EUR	chr7:100393925:C:T	chr7:100393925:C:T	T	C	rs7803454	0.122218	0.122218	4.8e-09	99914532	100638465	723.933	453	mQTL	chr7:99959594:T:C	rs6962405	ENSG00000207258	Y_RNA	cg11013060	Retina	4.66311e-08	0.000557	0.316755	0.0550155	0.016833	0.058086	SAME	0.899089	0.446135	chr7:99959594	FALSE	FALSE
AMD EUR	chr7:100393925:C:T	chr7:100393925:C:T	T	C	rs7803454	0.122218	0.122218	4.8e-09	99914532	100638465	723.933	453	mQTL	chr7:99959594:T:C	rs6962405	ENSG00000207265	Y_RNA	cg11013060	Retina	4.66311e-08	0.000557	0.316755	0.0550155	0.016833	0.058086	SAME	0.899089	0.446135	chr7:99959594	FALSE	FALSE
AMD EUR	chr7:100393925:C:T	chr7:100393925:C:T	T	C	rs7803454	0.122218	0.122218	4.8e-09	99914532	100638465	723.933	453	mQTL	chr7:99959594:T:C	rs6962405	ENSG00000207271	Y_RNA	cg11013060	Retina	4.66311e-08	0.000557	0.316755	0.0550155	0.016833	0.058086	SAME	0.899089	0.446135	chr7:99959594	FALSE	FALSE
AMD EUR	chr7:100393925:C:T	chr7:100393925:C:T	T	C	rs7803454	0.122218	0.122218	4.8e-09	99914532	100638465	723.933	453	mQTL	chr7:99959594:T:C	rs6962405	ENSG00000207281	Y_RNA	cg11013060	Retina	4.66311e-08	0.000557	0.316755	0.0550155	0.016833	0.058086	SAME	0.899089	0.446135	chr7:99959594	FALSE	FALSE
AMD EUR	chr7:100393925:C:T	chr7:100393925:C:T	T	C	rs7803454	0.122218	0.122218	4.8e-09	99914532	100638465	723.933	453	mQTL	chr7:99959594:T:C	rs6962405	ENSG00000207282	Y_RNA	cg11013060	Retina	4.66311e-08	0.000557	0.316755	0.0550155	0.016833	0.058086	SAME	0.899089	0.446135	chr7:99959594	FALSE	FALSE
AMD EUR	chr7:100393925:C:T	chr7:100393925:C:T	T	C	rs7803454	0.122218	0.122218	4.8e-09	99914532	100638465	723.933	453	mQTL	chr7:99959594:T:C	rs6962405	ENSG00000207283	Y_RNA	cg11013060	Retina	4.66311e-08	0.000557	0.316755	0.0550155	0.016833	0.058086	SAME	0.899089	0.446135	chr7:99959594	FALSE	FALSE
AMD EUR	chr7:100393925:C:T	chr7:100393925:C:T	T	C	rs7803454	0.122218	0.122218	4.8e-09	99914532	100638465	723.933	453	mQTL	chr7:99959594:T:C	rs6962405	ENSG00000207286	Y_RNA	cg11013060	Retina	4.66311e-08	0.000557	0.316755	0.0550155	0.016833	0.058086	SAME	0.899089	0.446135	chr7:99959594	FALSE	FALSE
AMD EUR	chr7:100393925:C:T	chr7:100393925:C:T	T	C	rs7803454	0.122218	0.122218	4.8e-09	99914532	100638465	723.933	453	mQTL	chr7:99959594:T:C	rs6962405	ENSG00000207290	Y_RNA	cg11013060	Retina	4.66311e-08	0.000557	0.316755	0.0550155	0.016833	0.058086	SAME	0.899089	0.446135	chr7:99959594	FALSE	FALSE
AMD EUR	chr7:100393925:C:T	chr7:100393925:C:T	T	C	rs7803454	0.122218	0.122218	4.8e-09	99914532	100638465	723.933	453	mQTL	chr7:99959594:T:C	rs6962405	ENSG00000207292	Y_RNA	cg11013060	Retina	4.66311e-08	0.000557	0.316755	0.0550155	0.016833	0.058086	SAME	0.899089	0.446135	chr7:99959594	FALSE	FALSE
AMD EUR	chr7:100393925:C:T	chr7:100393925:C:T	T	C	rs7803454	0.122218	0.122218	4.8e-09	99914532	100638465	723.933	453	mQTL	chr7:99959594:T:C	rs6962405	ENSG00000207293	Y_RNA	cg11013060	Retina	4.66311e-08	0.000557	0.316755	0.0550155	0.016833	0.058086	SAME	0.899089	0.446135	chr7:99959594	FALSE	FALSE
AMD EUR	chr7:100393925:C:T	chr7:100393925:C:T	T	C	rs7803454	0.122218	0.122218	4.8e-09	99914532	100638465	723.933	453	mQTL	chr7:99959594:T:C	rs6962405	ENSG00000207294	Y_RNA	cg11013060	Retina	4.66311e-08	0.000557	0.316755	0.0550155	0.016833	0.058086	SAME	0.899089	0.446135	chr7:99959594	FALSE	FALSE
AMD EUR	chr7:100393925:C:T	chr7:100393925:C:T	T	C	rs7803454	0.122218	0.122218	4.8e-09	99914532	100638465	723.933	453	mQTL	chr7:99959594:T:C	rs6962405	ENSG00000207300	Y_RNA	cg11013060	Retina	4.66311e-08	0.000557	0.316755	0.0550155	0.016833	0.058086	SAME	0.899089	0.446135	chr7:99959594	FALSE	FALSE
AMD EUR	chr7:100393925:C:T	chr7:100393925:C:T	T	C	rs7803454	0.122218	0.122218	4.8e-09	99914532	100638465	723.933	453	mQTL	chr7:99959594:T:C	rs6962405	ENSG00000207302	Y_RNA	cg11013060	Retina	4.66311e-08	0.000557	0.316755	0.0550155	0.016833	0.058086	SAME	0.899089	0.446135	chr7:99959594	FALSE	FALSE
AMD EUR	chr7:100393925:C:T	chr7:100393925:C:T	T	C	rs7803454	0.122218	0.122218	4.8e-09	99914532	100638465	723.933	453	mQTL	chr7:99959594:T:C	rs6962405	ENSG00000207303	Y_RNA	cg11013060	Retina	4.66311e-08	0.000557	0.316755	0.0550155	0.016833	0.058086	SAME	0.899089	0.446135	chr7:99959594	FALSE	FALSE
AMD EUR	chr7:100393925:C:T	chr7:100393925:C:T	T	C	rs7803454	0.122218	0.122218	4.8e-09	99914532	100638465	723.933	453	mQTL	chr7:99959594:T:C	rs6962405	ENSG00000207305	Y_RNA	cg11013060	Retina	4.66311e-08	0.000557	0.316755	0.0550155	0.016833	0.058086	SAME	0.899089	0.446135	chr7:99959594	FALSE	FALSE
AMD EUR	chr7:100393925:C:T	chr7:100393925:C:T	T	C	rs7803454	0.122218	0.122218	4.8e-09	99914532	100638465	723.933	453	mQTL	chr7:99959594:T:C	rs6962405	ENSG00000207316	Y_RNA	cg11013060	Retina	4.66311e-08	0.000557	0.316755	0.0550155	0.016833	0.058086	SAME	0.899089	0.446135	chr7:99959594	FALSE	FALSE
AMD EUR	chr7:100393925:C:T	chr7:100393925:C:T	T	C	rs7803454	0.122218	0.122218	4.8e-09	99914532	100638465	723.933	453	mQTL	chr7:99959594:T:C	rs6962405	ENSG00000207317	Y_RNA	cg11013060	Retina	4.66311e-08	0.000557	0.316755	0.0550155	0.016833	0.058086	SAME	0.899089	0.446135	chr7:99959594	FALSE	FALSE
AMD EUR	chr7:100393925:C:T	chr7:100393925:C:T	T	C	rs7803454	0.122218	0.122218	4.8e-09	99914532	100638465	723.933	453	mQTL	chr7:99959594:T:C	rs6962405	ENSG00000207319	Y_RNA	cg11013060	Retina	4.66311e-08	0.000557	0.316755	0.0550155	0.016833	0.058086	SAME	0.899089	0.446135	chr7:99959594	FALSE	FALSE
AMD EUR	chr7:100393925:C:T	chr7:100393925:C:T	T	C	rs7803454	0.122218	0.122218	4.8e-09	99914532	100638465	723.933	453	mQTL	chr7:99959594:T:C	rs6962405	ENSG00000207320	Y_RNA	cg11013060	Retina	4.66311e-08	0.000557	0.316755	0.0550155	0.016833	0.058086	SAME	0.899089	0.446135	chr7:99959594	FALSE	FALSE
AMD EUR	chr7:100393925:C:T	chr7:100393925:C:T	T	C	rs7803454	0.122218	0.122218	4.8e-09	99914532	100638465	723.933	453	mQTL	chr7:99959594:T:C	rs6962405	ENSG00000207326	Y_RNA	cg11013060	Retina	4.66311e-08	0.000557	0.316755	0.0550155	0.016833	0.058086	SAME	0.899089	0.446135	chr7:99959594	FALSE	FALSE
AMD EUR	chr7:100393925:C:T	chr7:100393925:C:T	T	C	rs7803454	0.122218	0.122218	4.8e-09	99914532	100638465	723.933	453	mQTL	chr7:99959594:T:C	rs6962405	ENSG00000207329	Y_RNA	cg11013060	Retina	4.66311e-08	0.000557	0.316755	0.0550155	0.016833	0.058086	SAME	0.899089	0.446135	chr7:99959594	FALSE	FALSE
AMD EUR	chr7:100393925:C:T	chr7:100393925:C:T	T	C	rs7803454	0.122218	0.122218	4.8e-09	99914532	100638465	723.933	453	mQTL	chr7:99959594:T:C	rs6962405	ENSG00000207342	Y_RNA	cg11013060	Retina	4.66311e-08	0.000557	0.316755	0.0550155	0.016833	0.058086	SAME	0.899089	0.446135	chr7:99959594	FALSE	FALSE
AMD EUR	chr7:100393925:C:T	chr7:100393925:C:T	T	C	rs7803454	0.122218	0.122218	4.8e-09	99914532	100638465	723.933	453	mQTL	chr7:99959594:T:C	rs6962405	ENSG00000207351	Y_RNA	cg11013060	Retina	4.66311e-08	0.000557	0.316755	0.0550155	0.016833	0.058086	SAME	0.899089	0.446135	chr7:99959594	FALSE	FALSE
AMD EUR	chr7:100393925:C:T	chr7:100393925:C:T	T	C	rs7803454	0.122218	0.122218	4.8e-09	99914532	100638465	723.933	453	mQTL	chr7:99959594:T:C	rs6962405	ENSG00000207356	Y_RNA	cg11013060	Retina	4.66311e-08	0.000557	0.316755	0.0550155	0.016833	0.058086	SAME	0.899089	0.446135	chr7:99959594	FALSE	FALSE
AMD EUR	chr7:100393925:C:T	chr7:100393925:C:T	T	C	rs7803454	0.122218	0.122218	4.8e-09	99914532	100638465	723.933	453	mQTL	chr7:99959594:T:C	rs6962405	ENSG00000207363	Y_RNA	cg11013060	Retina	4.66311e-08	0.000557	0.316755	0.0550155	0.016833	0.058086	SAME	0.899089	0.446135	chr7:99959594	FALSE	FALSE
AMD EUR	chr7:100393925:C:T	chr7:100393925:C:T	T	C	rs7803454	0.122218	0.122218	4.8e-09	99914532	100638465	723.933	453	mQTL	chr7:99959594:T:C	rs6962405	ENSG00000207365	Y_RNA	cg11013060	Retina	4.66311e-08	0.000557	0.316755	0.0550155	0.016833	0.058086	SAME	0.899089	0.446135	chr7:99959594	FALSE	FALSE
AMD EUR	chr7:100393925:C:T	chr7:100393925:C:T	T	C	rs7803454	0.122218	0.122218	4.8e-09	99914532	100638465	723.933	453	mQTL	chr7:99959594:T:C	rs6962405	ENSG00000207368	Y_RNA	cg11013060	Retina	4.66311e-08	0.000557	0.316755	0.0550155	0.016833	0.058086	SAME	0.899089	0.446135	chr7:99959594	FALSE	FALSE
AMD EUR	chr7:100393925:C:T	chr7:100393925:C:T	T	C	rs7803454	0.122218	0.122218	4.8e-09	99914532	100638465	723.933	453	mQTL	chr7:99959594:T:C	rs6962405	ENSG00000207370	Y_RNA	cg11013060	Retina	4.66311e-08	0.000557	0.316755	0.0550155	0.016833	0.058086	SAME	0.899089	0.446135	chr7:99959594	FALSE	FALSE
AMD EUR	chr7:100393925:C:T	chr7:100393925:C:T	T	C	rs7803454	0.122218	0.122218	4.8e-09	99914532	100638465	723.933	453	mQTL	chr7:99959594:T:C	rs6962405	ENSG00000207371	Y_RNA	cg11013060	Retina	4.66311e-08	0.000557	0.316755	0.0550155	0.016833	0.058086	SAME	0.899089	0.446135	chr7:99959594	FALSE	FALSE
AMD EUR	chr7:100393925:C:T	chr7:100393925:C:T	T	C	rs7803454	0.122218	0.122218	4.8e-09	99914532	100638465	723.933	453	mQTL	chr7:99959594:T:C	rs6962405	ENSG00000207379	Y_RNA	cg11013060	Retina	4.66311e-08	0.000557	0.316755	0.0550155	0.016833	0.058086	SAME	0.899089	0.446135	chr7:99959594	FALSE	FALSE
AMD EUR	chr7:100393925:C:T	chr7:100393925:C:T	T	C	rs7803454	0.122218	0.122218	4.8e-09	99914532	100638465	723.933	453	mQTL	chr7:99959594:T:C	rs6962405	ENSG00000207380	Y_RNA	cg11013060	Retina	4.66311e-08	0.000557	0.316755	0.0550155	0.016833	0.058086	SAME	0.899089	0.446135	chr7:99959594	FALSE	FALSE
AMD EUR	chr7:100393925:C:T	chr7:100393925:C:T	T	C	rs7803454	0.122218	0.122218	4.8e-09	99914532	100638465	723.933	453	mQTL	chr7:99959594:T:C	rs6962405	ENSG00000207382	Y_RNA	cg11013060	Retina	4.66311e-08	0.000557	0.316755	0.0550155	0.016833	0.058086	SAME	0.899089	0.446135	chr7:99959594	FALSE	FALSE
AMD EUR	chr7:100393925:C:T	chr7:100393925:C:T	T	C	rs7803454	0.122218	0.122218	4.8e-09	99914532	100638465	723.933	453	mQTL	chr7:99959594:T:C	rs6962405	ENSG00000207383	Y_RNA	cg11013060	Retina	4.66311e-08	0.000557	0.316755	0.0550155	0.016833	0.058086	SAME	0.899089	0.446135	chr7:99959594	FALSE	FALSE
AMD EUR	chr7:100393925:C:T	chr7:100393925:C:T	T	C	rs7803454	0.122218	0.122218	4.8e-09	99914532	100638465	723.933	453	mQTL	chr7:99959594:T:C	rs6962405	ENSG00000207384	Y_RNA	cg11013060	Retina	4.66311e-08	0.000557	0.316755	0.0550155	0.016833	0.058086	SAME	0.899089	0.446135	chr7:99959594	FALSE	FALSE
AMD EUR	chr7:100393925:C:T	chr7:100393925:C:T	T	C	rs7803454	0.122218	0.122218	4.8e-09	99914532	100638465	723.933	453	mQTL	chr7:99959594:T:C	rs6962405	ENSG00000207386	Y_RNA	cg11013060	Retina	4.66311e-08	0.000557	0.316755	0.0550155	0.016833	0.058086	SAME	0.899089	0.446135	chr7:99959594	FALSE	FALSE
AMD EUR	chr7:100393925:C:T	chr7:100393925:C:T	T	C	rs7803454	0.122218	0.122218	4.8e-09	99914532	100638465	723.933	453	mQTL	chr7:99959594:T:C	rs6962405	ENSG00000207387	Y_RNA	cg11013060	Retina	4.66311e-08	0.000557	0.316755	0.0550155	0.016833	0.058086	SAME	0.899089	0.446135	chr7:99959594	FALSE	FALSE
AMD EUR	chr7:100393925:C:T	chr7:100393925:C:T	T	C	rs7803454	0.122218	0.122218	4.8e-09	99914532	100638465	723.933	453	mQTL	chr7:99959594:T:C	rs6962405	ENSG00000207391	Y_RNA	cg11013060	Retina	4.66311e-08	0.000557	0.316755	0.0550155	0.016833	0.058086	SAME	0.899089	0.446135	chr7:99959594	FALSE	FALSE
AMD EUR	chr7:100393925:C:T	chr7:100393925:C:T	T	C	rs7803454	0.122218	0.122218	4.8e-09	99914532	100638465	723.933	453	mQTL	chr7:99959594:T:C	rs6962405	ENSG00000207395	Y_RNA	cg11013060	Retina	4.66311e-08	0.000557	0.316755	0.0550155	0.016833	0.058086	SAME	0.899089	0.446135	chr7:99959594	FALSE	FALSE
AMD EUR	chr7:100393925:C:T	chr7:100393925:C:T	T	C	rs7803454	0.122218	0.122218	4.8e-09	99914532	100638465	723.933	453	mQTL	chr7:99959594:T:C	rs6962405	ENSG00000207401	Y_RNA	cg11013060	Retina	4.66311e-08	0.000557	0.316755	0.0550155	0.016833	0.058086	SAME	0.899089	0.446135	chr7:99959594	FALSE	FALSE
AMD EUR	chr7:100393925:C:T	chr7:100393925:C:T	T	C	rs7803454	0.122218	0.122218	4.8e-09	99914532	100638465	723.933	453	mQTL	chr7:99959594:T:C	rs6962405	ENSG00000207403	Y_RNA	cg11013060	Retina	4.66311e-08	0.000557	0.316755	0.0550155	0.016833	0.058086	SAME	0.899089	0.446135	chr7:99959594	FALSE	FALSE
AMD EUR	chr7:100393925:C:T	chr7:100393925:C:T	T	C	rs7803454	0.122218	0.122218	4.8e-09	99914532	100638465	723.933	453	mQTL	chr7:99959594:T:C	rs6962405	ENSG00000207404	Y_RNA	cg11013060	Retina	4.66311e-08	0.000557	0.316755	0.0550155	0.016833	0.058086	SAME	0.899089	0.446135	chr7:99959594	FALSE	FALSE
AMD EUR	chr7:100393925:C:T	chr7:100393925:C:T	T	C	rs7803454	0.122218	0.122218	4.8e-09	99914532	100638465	723.933	453	mQTL	chr7:99959594:T:C	rs6962405	ENSG00000207408	Y_RNA	cg11013060	Retina	4.66311e-08	0.000557	0.316755	0.0550155	0.016833	0.058086	SAME	0.899089	0.446135	chr7:99959594	FALSE	FALSE
AMD EUR	chr7:100393925:C:T	chr7:100393925:C:T	T	C	rs7803454	0.122218	0.122218	4.8e-09	99914532	100638465	723.933	453	mQTL	chr7:99959594:T:C	rs6962405	ENSG00000207411	Y_RNA	cg11013060	Retina	4.66311e-08	0.000557	0.316755	0.0550155	0.016833	0.058086	SAME	0.899089	0.446135	chr7:99959594	FALSE	FALSE
AMD EUR	chr7:100393925:C:T	chr7:100393925:C:T	T	C	rs7803454	0.122218	0.122218	4.8e-09	99914532	100638465	723.933	453	mQTL	chr7:99959594:T:C	rs6962405	ENSG00000207416	Y_RNA	cg11013060	Retina	4.66311e-08	0.000557	0.316755	0.0550155	0.016833	0.058086	SAME	0.899089	0.446135	chr7:99959594	FALSE	FALSE
AMD EUR	chr7:100393925:C:T	chr7:100393925:C:T	T	C	rs7803454	0.122218	0.122218	4.8e-09	99914532	100638465	723.933	453	mQTL	chr7:99959594:T:C	rs6962405	ENSG00000207417	Y_RNA	cg11013060	Retina	4.66311e-08	0.000557	0.316755	0.0550155	0.016833	0.058086	SAME	0.899089	0.446135	chr7:99959594	FALSE	FALSE
AMD EUR	chr7:100393925:C:T	chr7:100393925:C:T	T	C	rs7803454	0.122218	0.122218	4.8e-09	99914532	100638465	723.933	453	mQTL	chr7:99959594:T:C	rs6962405	ENSG00000207420	Y_RNA	cg11013060	Retina	4.66311e-08	0.000557	0.316755	0.0550155	0.016833	0.058086	SAME	0.899089	0.446135	chr7:99959594	FALSE	FALSE
AMD EUR	chr7:100393925:C:T	chr7:100393925:C:T	T	C	rs7803454	0.122218	0.122218	4.8e-09	99914532	100638465	723.933	453	mQTL	chr7:99959594:T:C	rs6962405	ENSG00000207425	Y_RNA	cg11013060	Retina	4.66311e-08	0.000557	0.316755	0.0550155	0.016833	0.058086	SAME	0.899089	0.446135	chr7:99959594	FALSE	FALSE
AMD EUR	chr7:100393925:C:T	chr7:100393925:C:T	T	C	rs7803454	0.122218	0.122218	4.8e-09	99914532	100638465	723.933	453	mQTL	chr7:99959594:T:C	rs6962405	ENSG00000207426	Y_RNA	cg11013060	Retina	4.66311e-08	0.000557	0.316755	0.0550155	0.016833	0.058086	SAME	0.899089	0.446135	chr7:99959594	FALSE	FALSE
AMD EUR	chr7:100393925:C:T	chr7:100393925:C:T	T	C	rs7803454	0.122218	0.122218	4.8e-09	99914532	100638465	723.933	453	mQTL	chr7:99959594:T:C	rs6962405	ENSG00000207438	Y_RNA	cg11013060	Retina	4.66311e-08	0.000557	0.316755	0.0550155	0.016833	0.058086	SAME	0.899089	0.446135	chr7:99959594	FALSE	FALSE
AMD EUR	chr7:100393925:C:T	chr7:100393925:C:T	T	C	rs7803454	0.122218	0.122218	4.8e-09	99914532	100638465	723.933	453	mQTL	chr7:99959594:T:C	rs6962405	ENSG00000207439	Y_RNA	cg11013060	Retina	4.66311e-08	0.000557	0.316755	0.0550155	0.016833	0.058086	SAME	0.899089	0.446135	chr7:99959594	FALSE	FALSE
AMD EUR	chr7:100393925:C:T	chr7:100393925:C:T	T	C	rs7803454	0.122218	0.122218	4.8e-09	99914532	100638465	723.933	453	mQTL	chr7:99959594:T:C	rs6962405	ENSG00000207450	Y_RNA	cg11013060	Retina	4.66311e-08	0.000557	0.316755	0.0550155	0.016833	0.058086	SAME	0.899089	0.446135	chr7:99959594	FALSE	FALSE
AMD EUR	chr7:100393925:C:T	chr7:100393925:C:T	T	C	rs7803454	0.122218	0.122218	4.8e-09	99914532	100638465	723.933	453	mQTL	chr7:99959594:T:C	rs6962405	ENSG00000207466	Y_RNA	cg11013060	Retina	4.66311e-08	0.000557	0.316755	0.0550155	0.016833	0.058086	SAME	0.899089	0.446135	chr7:99959594	FALSE	FALSE
AMD EUR	chr7:100393925:C:T	chr7:100393925:C:T	T	C	rs7803454	0.122218	0.122218	4.8e-09	99914532	100638465	723.933	453	mQTL	chr7:99959594:T:C	rs6962405	ENSG00000207467	Y_RNA	cg11013060	Retina	4.66311e-08	0.000557	0.316755	0.0550155	0.016833	0.058086	SAME	0.899089	0.446135	chr7:99959594	FALSE	FALSE
AMD EUR	chr7:100393925:C:T	chr7:100393925:C:T	T	C	rs7803454	0.122218	0.122218	4.8e-09	99914532	100638465	723.933	453	mQTL	chr7:99959594:T:C	rs6962405	ENSG00000207473	Y_RNA	cg11013060	Retina	4.66311e-08	0.000557	0.316755	0.0550155	0.016833	0.058086	SAME	0.899089	0.446135	chr7:99959594	FALSE	FALSE
AMD EUR	chr7:100393925:C:T	chr7:100393925:C:T	T	C	rs7803454	0.122218	0.122218	4.8e-09	99914532	100638465	723.933	453	mQTL	chr7:99959594:T:C	rs6962405	ENSG00000207480	Y_RNA	cg11013060	Retina	4.66311e-08	0.000557	0.316755	0.0550155	0.016833	0.058086	SAME	0.899089	0.446135	chr7:99959594	FALSE	FALSE
AMD EUR	chr7:100393925:C:T	chr7:100393925:C:T	T	C	rs7803454	0.122218	0.122218	4.8e-09	99914532	100638465	723.933	453	mQTL	chr7:99959594:T:C	rs6962405	ENSG00000207481	Y_RNA	cg11013060	Retina	4.66311e-08	0.000557	0.316755	0.0550155	0.016833	0.058086	SAME	0.899089	0.446135	chr7:99959594	FALSE	FALSE
AMD EUR	chr7:100393925:C:T	chr7:100393925:C:T	T	C	rs7803454	0.122218	0.122218	4.8e-09	99914532	100638465	723.933	453	mQTL	chr7:99959594:T:C	rs6962405	ENSG00000207484	Y_RNA	cg11013060	Retina	4.66311e-08	0.000557	0.316755	0.0550155	0.016833	0.058086	SAME	0.899089	0.446135	chr7:99959594	FALSE	FALSE
AMD EUR	chr7:100393925:C:T	chr7:100393925:C:T	T	C	rs7803454	0.122218	0.122218	4.8e-09	99914532	100638465	723.933	453	mQTL	chr7:99959594:T:C	rs6962405	ENSG00000207488	Y_RNA	cg11013060	Retina	4.66311e-08	0.000557	0.316755	0.0550155	0.016833	0.058086	SAME	0.899089	0.446135	chr7:99959594	FALSE	FALSE
AMD EUR	chr7:100393925:C:T	chr7:100393925:C:T	T	C	rs7803454	0.122218	0.122218	4.8e-09	99914532	100638465	723.933	453	mQTL	chr7:99959594:T:C	rs6962405	ENSG00000207494	Y_RNA	cg11013060	Retina	4.66311e-08	0.000557	0.316755	0.0550155	0.016833	0.058086	SAME	0.899089	0.446135	chr7:99959594	FALSE	FALSE
AMD EUR	chr7:100393925:C:T	chr7:100393925:C:T	T	C	rs7803454	0.122218	0.122218	4.8e-09	99914532	100638465	723.933	453	mQTL	chr7:99959594:T:C	rs6962405	ENSG00000207497	Y_RNA	cg11013060	Retina	4.66311e-08	0.000557	0.316755	0.0550155	0.016833	0.058086	SAME	0.899089	0.446135	chr7:99959594	FALSE	FALSE
AMD EUR	chr7:100393925:C:T	chr7:100393925:C:T	T	C	rs7803454	0.122218	0.122218	4.8e-09	99914532	100638465	723.933	453	mQTL	chr7:99959594:T:C	rs6962405	ENSG00000207499	Y_RNA	cg11013060	Retina	4.66311e-08	0.000557	0.316755	0.0550155	0.016833	0.058086	SAME	0.899089	0.446135	chr7:99959594	FALSE	FALSE
AMD EUR	chr7:100393925:C:T	chr7:100393925:C:T	T	C	rs7803454	0.122218	0.122218	4.8e-09	99914532	100638465	723.933	453	mQTL	chr7:99959594:T:C	rs6962405	ENSG00000207512	Y_RNA	cg11013060	Retina	4.66311e-08	0.000557	0.316755	0.0550155	0.016833	0.058086	SAME	0.899089	0.446135	chr7:99959594	FALSE	FALSE
AMD EUR	chr7:100393925:C:T	chr7:100393925:C:T	T	C	rs7803454	0.122218	0.122218	4.8e-09	99914532	100638465	723.933	453	mQTL	chr7:99959594:T:C	rs6962405	ENSG00000207525	Y_RNA	cg11013060	Retina	4.66311e-08	0.000557	0.316755	0.0550155	0.016833	0.058086	SAME	0.899089	0.446135	chr7:99959594	FALSE	FALSE
AMD EUR	chr7:100393925:C:T	chr7:100393925:C:T	T	C	rs7803454	0.122218	0.122218	4.8e-09	99914532	100638465	723.933	453	mQTL	chr7:99959594:T:C	rs6962405	ENSG00000212205	Y_RNA	cg11013060	Retina	4.66311e-08	0.000557	0.316755	0.0550155	0.016833	0.058086	SAME	0.899089	0.446135	chr7:99959594	FALSE	FALSE
AMD EUR	chr7:100393925:C:T	chr7:100393925:C:T	T	C	rs7803454	0.122218	0.122218	4.8e-09	99914532	100638465	723.933	453	mQTL	chr7:99959594:T:C	rs6962405	ENSG00000212241	Y_RNA	cg11013060	Retina	4.66311e-08	0.000557	0.316755	0.0550155	0.016833	0.058086	SAME	0.899089	0.446135	chr7:99959594	FALSE	FALSE
AMD EUR	chr7:100393925:C:T	chr7:100393925:C:T	T	C	rs7803454	0.122218	0.122218	4.8e-09	99914532	100638465	723.933	453	mQTL	chr7:99959594:T:C	rs6962405	ENSG00000212306	Y_RNA	cg11013060	Retina	4.66311e-08	0.000557	0.316755	0.0550155	0.016833	0.058086	SAME	0.899089	0.446135	chr7:99959594	FALSE	FALSE
AMD EUR	chr7:100393925:C:T	chr7:100393925:C:T	T	C	rs7803454	0.122218	0.122218	4.8e-09	99914532	100638465	723.933	453	mQTL	chr7:99959594:T:C	rs6962405	ENSG00000212319	Y_RNA	cg11013060	Retina	4.66311e-08	0.000557	0.316755	0.0550155	0.016833	0.058086	SAME	0.899089	0.446135	chr7:99959594	FALSE	FALSE
AMD EUR	chr7:100393925:C:T	chr7:100393925:C:T	T	C	rs7803454	0.122218	0.122218	4.8e-09	99914532	100638465	723.933	453	mQTL	chr7:99959594:T:C	rs6962405	ENSG00000212325	Y_RNA	cg11013060	Retina	4.66311e-08	0.000557	0.316755	0.0550155	0.016833	0.058086	SAME	0.899089	0.446135	chr7:99959594	FALSE	FALSE
AMD EUR	chr7:100393925:C:T	chr7:100393925:C:T	T	C	rs7803454	0.122218	0.122218	4.8e-09	99914532	100638465	723.933	453	mQTL	chr7:99959594:T:C	rs6962405	ENSG00000212335	Y_RNA	cg11013060	Retina	4.66311e-08	0.000557	0.316755	0.0550155	0.016833	0.058086	SAME	0.899089	0.446135	chr7:99959594	FALSE	FALSE
AMD EUR	chr7:100393925:C:T	chr7:100393925:C:T	T	C	rs7803454	0.122218	0.122218	4.8e-09	99914532	100638465	723.933	453	mQTL	chr7:99959594:T:C	rs6962405	ENSG00000212392	Y_RNA	cg11013060	Retina	4.66311e-08	0.000557	0.316755	0.0550155	0.016833	0.058086	SAME	0.899089	0.446135	chr7:99959594	FALSE	FALSE
AMD EUR	chr7:100393925:C:T	chr7:100393925:C:T	T	C	rs7803454	0.122218	0.122218	4.8e-09	99914532	100638465	723.933	453	mQTL	chr7:99959594:T:C	rs6962405	ENSG00000212404	Y_RNA	cg11013060	Retina	4.66311e-08	0.000557	0.316755	0.0550155	0.016833	0.058086	SAME	0.899089	0.446135	chr7:99959594	FALSE	FALSE
AMD EUR	chr7:100393925:C:T	chr7:100393925:C:T	T	C	rs7803454	0.122218	0.122218	4.8e-09	99914532	100638465	723.933	453	mQTL	chr7:99959594:T:C	rs6962405	ENSG00000212448	Y_RNA	cg11013060	Retina	4.66311e-08	0.000557	0.316755	0.0550155	0.016833	0.058086	SAME	0.899089	0.446135	chr7:99959594	FALSE	FALSE
AMD EUR	chr7:100393925:C:T	chr7:100393925:C:T	T	C	rs7803454	0.122218	0.122218	4.8e-09	99914532	100638465	723.933	453	mQTL	chr7:99959594:T:C	rs6962405	ENSG00000212512	Y_RNA	cg11013060	Retina	4.66311e-08	0.000557	0.316755	0.0550155	0.016833	0.058086	SAME	0.899089	0.446135	chr7:99959594	FALSE	FALSE
AMD EUR	chr7:100393925:C:T	chr7:100393925:C:T	T	C	rs7803454	0.122218	0.122218	4.8e-09	99914532	100638465	723.933	453	mQTL	chr7:99959594:T:C	rs6962405	ENSG00000212556	Y_RNA	cg11013060	Retina	4.66311e-08	0.000557	0.316755	0.0550155	0.016833	0.058086	SAME	0.899089	0.446135	chr7:99959594	FALSE	FALSE
AMD EUR	chr7:100393925:C:T	chr7:100393925:C:T	T	C	rs7803454	0.122218	0.122218	4.8e-09	99914532	100638465	723.933	453	mQTL	chr7:99959594:T:C	rs6962405	ENSG00000212569	Y_RNA	cg11013060	Retina	4.66311e-08	0.000557	0.316755	0.0550155	0.016833	0.058086	SAME	0.899089	0.446135	chr7:99959594	FALSE	FALSE
AMD EUR	chr7:100393925:C:T	chr7:100393925:C:T	T	C	rs7803454	0.122218	0.122218	4.8e-09	99914532	100638465	723.933	453	mQTL	chr7:99959594:T:C	rs6962405	ENSG00000222072	Y_RNA	cg11013060	Retina	4.66311e-08	0.000557	0.316755	0.0550155	0.016833	0.058086	SAME	0.899089	0.446135	chr7:99959594	FALSE	FALSE
AMD EUR	chr7:100393925:C:T	chr7:100393925:C:T	T	C	rs7803454	0.122218	0.122218	4.8e-09	99914532	100638465	723.933	453	mQTL	chr7:99959594:T:C	rs6962405	ENSG00000222160	Y_RNA	cg11013060	Retina	4.66311e-08	0.000557	0.316755	0.0550155	0.016833	0.058086	SAME	0.899089	0.446135	chr7:99959594	FALSE	FALSE
AMD EUR	chr7:100393925:C:T	chr7:100393925:C:T	T	C	rs7803454	0.122218	0.122218	4.8e-09	99914532	100638465	723.933	453	mQTL	chr7:99959594:T:C	rs6962405	ENSG00000222206	Y_RNA	cg11013060	Retina	4.66311e-08	0.000557	0.316755	0.0550155	0.016833	0.058086	SAME	0.899089	0.446135	chr7:99959594	FALSE	FALSE
AMD EUR	chr7:100393925:C:T	chr7:100393925:C:T	T	C	rs7803454	0.122218	0.122218	4.8e-09	99914532	100638465	723.933	453	mQTL	chr7:99959594:T:C	rs6962405	ENSG00000222224	Y_RNA	cg11013060	Retina	4.66311e-08	0.000557	0.316755	0.0550155	0.016833	0.058086	SAME	0.899089	0.446135	chr7:99959594	FALSE	FALSE
AMD EUR	chr7:100393925:C:T	chr7:100393925:C:T	T	C	rs7803454	0.122218	0.122218	4.8e-09	99914532	100638465	723.933	453	mQTL	chr7:99959594:T:C	rs6962405	ENSG00000222305	Y_RNA	cg11013060	Retina	4.66311e-08	0.000557	0.316755	0.0550155	0.016833	0.058086	SAME	0.899089	0.446135	chr7:99959594	FALSE	FALSE
AMD EUR	chr7:100393925:C:T	chr7:100393925:C:T	T	C	rs7803454	0.122218	0.122218	4.8e-09	99914532	100638465	723.933	453	mQTL	chr7:99959594:T:C	rs6962405	ENSG00000222335	Y_RNA	cg11013060	Retina	4.66311e-08	0.000557	0.316755	0.0550155	0.016833	0.058086	SAME	0.899089	0.446135	chr7:99959594	FALSE	FALSE
AMD EUR	chr7:100393925:C:T	chr7:100393925:C:T	T	C	rs7803454	0.122218	0.122218	4.8e-09	99914532	100638465	723.933	453	mQTL	chr7:99959594:T:C	rs6962405	ENSG00000222394	Y_RNA	cg11013060	Retina	4.66311e-08	0.000557	0.316755	0.0550155	0.016833	0.058086	SAME	0.899089	0.446135	chr7:99959594	FALSE	FALSE
AMD EUR	chr7:100393925:C:T	chr7:100393925:C:T	T	C	rs7803454	0.122218	0.122218	4.8e-09	99914532	100638465	723.933	453	mQTL	chr7:99959594:T:C	rs6962405	ENSG00000222395	Y_RNA	cg11013060	Retina	4.66311e-08	0.000557	0.316755	0.0550155	0.016833	0.058086	SAME	0.899089	0.446135	chr7:99959594	FALSE	FALSE
AMD EUR	chr7:100393925:C:T	chr7:100393925:C:T	T	C	rs7803454	0.122218	0.122218	4.8e-09	99914532	100638465	723.933	453	mQTL	chr7:99959594:T:C	rs6962405	ENSG00000222412	Y_RNA	cg11013060	Retina	4.66311e-08	0.000557	0.316755	0.0550155	0.016833	0.058086	SAME	0.899089	0.446135	chr7:99959594	FALSE	FALSE
AMD EUR	chr7:100393925:C:T	chr7:100393925:C:T	T	C	rs7803454	0.122218	0.122218	4.8e-09	99914532	100638465	723.933	453	mQTL	chr7:99959594:T:C	rs6962405	ENSG00000222421	Y_RNA	cg11013060	Retina	4.66311e-08	0.000557	0.316755	0.0550155	0.016833	0.058086	SAME	0.899089	0.446135	chr7:99959594	FALSE	FALSE
AMD EUR	chr7:100393925:C:T	chr7:100393925:C:T	T	C	rs7803454	0.122218	0.122218	4.8e-09	99914532	100638465	723.933	453	mQTL	chr7:99959594:T:C	rs6962405	ENSG00000222430	Y_RNA	cg11013060	Retina	4.66311e-08	0.000557	0.316755	0.0550155	0.016833	0.058086	SAME	0.899089	0.446135	chr7:99959594	FALSE	FALSE
AMD EUR	chr7:100393925:C:T	chr7:100393925:C:T	T	C	rs7803454	0.122218	0.122218	4.8e-09	99914532	100638465	723.933	453	mQTL	chr7:99959594:T:C	rs6962405	ENSG00000222432	Y_RNA	cg11013060	Retina	4.66311e-08	0.000557	0.316755	0.0550155	0.016833	0.058086	SAME	0.899089	0.446135	chr7:99959594	FALSE	FALSE
AMD EUR	chr7:100393925:C:T	chr7:100393925:C:T	T	C	rs7803454	0.122218	0.122218	4.8e-09	99914532	100638465	723.933	453	mQTL	chr7:99959594:T:C	rs6962405	ENSG00000222467	Y_RNA	cg11013060	Retina	4.66311e-08	0.000557	0.316755	0.0550155	0.016833	0.058086	SAME	0.899089	0.446135	chr7:99959594	FALSE	FALSE
AMD EUR	chr7:100393925:C:T	chr7:100393925:C:T	T	C	rs7803454	0.122218	0.122218	4.8e-09	99914532	100638465	723.933	453	mQTL	chr7:99959594:T:C	rs6962405	ENSG00000222503	Y_RNA	cg11013060	Retina	4.66311e-08	0.000557	0.316755	0.0550155	0.016833	0.058086	SAME	0.899089	0.446135	chr7:99959594	FALSE	FALSE
AMD EUR	chr7:100393925:C:T	chr7:100393925:C:T	T	C	rs7803454	0.122218	0.122218	4.8e-09	99914532	100638465	723.933	453	mQTL	chr7:99959594:T:C	rs6962405	ENSG00000222506	Y_RNA	cg11013060	Retina	4.66311e-08	0.000557	0.316755	0.0550155	0.016833	0.058086	SAME	0.899089	0.446135	chr7:99959594	FALSE	FALSE
AMD EUR	chr7:100393925:C:T	chr7:100393925:C:T	T	C	rs7803454	0.122218	0.122218	4.8e-09	99914532	100638465	723.933	453	mQTL	chr7:99959594:T:C	rs6962405	ENSG00000222509	Y_RNA	cg11013060	Retina	4.66311e-08	0.000557	0.316755	0.0550155	0.016833	0.058086	SAME	0.899089	0.446135	chr7:99959594	FALSE	FALSE
AMD EUR	chr7:100393925:C:T	chr7:100393925:C:T	T	C	rs7803454	0.122218	0.122218	4.8e-09	99914532	100638465	723.933	453	mQTL	chr7:99959594:T:C	rs6962405	ENSG00000222511	Y_RNA	cg11013060	Retina	4.66311e-08	0.000557	0.316755	0.0550155	0.016833	0.058086	SAME	0.899089	0.446135	chr7:99959594	FALSE	FALSE
AMD EUR	chr7:100393925:C:T	chr7:100393925:C:T	T	C	rs7803454	0.122218	0.122218	4.8e-09	99914532	100638465	723.933	453	mQTL	chr7:99959594:T:C	rs6962405	ENSG00000222529	Y_RNA	cg11013060	Retina	4.66311e-08	0.000557	0.316755	0.0550155	0.016833	0.058086	SAME	0.899089	0.446135	chr7:99959594	FALSE	FALSE
AMD EUR	chr7:100393925:C:T	chr7:100393925:C:T	T	C	rs7803454	0.122218	0.122218	4.8e-09	99914532	100638465	723.933	453	mQTL	chr7:99959594:T:C	rs6962405	ENSG00000222579	Y_RNA	cg11013060	Retina	4.66311e-08	0.000557	0.316755	0.0550155	0.016833	0.058086	SAME	0.899089	0.446135	chr7:99959594	FALSE	FALSE
AMD EUR	chr7:100393925:C:T	chr7:100393925:C:T	T	C	rs7803454	0.122218	0.122218	4.8e-09	99914532	100638465	723.933	453	mQTL	chr7:99959594:T:C	rs6962405	ENSG00000222601	Y_RNA	cg11013060	Retina	4.66311e-08	0.000557	0.316755	0.0550155	0.016833	0.058086	SAME	0.899089	0.446135	chr7:99959594	FALSE	FALSE
AMD EUR	chr7:100393925:C:T	chr7:100393925:C:T	T	C	rs7803454	0.122218	0.122218	4.8e-09	99914532	100638465	723.933	453	mQTL	chr7:99959594:T:C	rs6962405	ENSG00000222613	Y_RNA	cg11013060	Retina	4.66311e-08	0.000557	0.316755	0.0550155	0.016833	0.058086	SAME	0.899089	0.446135	chr7:99959594	FALSE	FALSE
AMD EUR	chr7:100393925:C:T	chr7:100393925:C:T	T	C	rs7803454	0.122218	0.122218	4.8e-09	99914532	100638465	723.933	453	mQTL	chr7:99959594:T:C	rs6962405	ENSG00000222614	Y_RNA	cg11013060	Retina	4.66311e-08	0.000557	0.316755	0.0550155	0.016833	0.058086	SAME	0.899089	0.446135	chr7:99959594	FALSE	FALSE
AMD EUR	chr7:100393925:C:T	chr7:100393925:C:T	T	C	rs7803454	0.122218	0.122218	4.8e-09	99914532	100638465	723.933	453	mQTL	chr7:99959594:T:C	rs6962405	ENSG00000222649	Y_RNA	cg11013060	Retina	4.66311e-08	0.000557	0.316755	0.0550155	0.016833	0.058086	SAME	0.899089	0.446135	chr7:99959594	FALSE	FALSE
AMD EUR	chr7:100393925:C:T	chr7:100393925:C:T	T	C	rs7803454	0.122218	0.122218	4.8e-09	99914532	100638465	723.933	453	mQTL	chr7:99959594:T:C	rs6962405	ENSG00000222658	Y_RNA	cg11013060	Retina	4.66311e-08	0.000557	0.316755	0.0550155	0.016833	0.058086	SAME	0.899089	0.446135	chr7:99959594	FALSE	FALSE
AMD EUR	chr7:100393925:C:T	chr7:100393925:C:T	T	C	rs7803454	0.122218	0.122218	4.8e-09	99914532	100638465	723.933	453	mQTL	chr7:99959594:T:C	rs6962405	ENSG00000222698	Y_RNA	cg11013060	Retina	4.66311e-08	0.000557	0.316755	0.0550155	0.016833	0.058086	SAME	0.899089	0.446135	chr7:99959594	FALSE	FALSE
AMD EUR	chr7:100393925:C:T	chr7:100393925:C:T	T	C	rs7803454	0.122218	0.122218	4.8e-09	99914532	100638465	723.933	453	mQTL	chr7:99959594:T:C	rs6962405	ENSG00000222701	Y_RNA	cg11013060	Retina	4.66311e-08	0.000557	0.316755	0.0550155	0.016833	0.058086	SAME	0.899089	0.446135	chr7:99959594	FALSE	FALSE
AMD EUR	chr7:100393925:C:T	chr7:100393925:C:T	T	C	rs7803454	0.122218	0.122218	4.8e-09	99914532	100638465	723.933	453	mQTL	chr7:99959594:T:C	rs6962405	ENSG00000222767	Y_RNA	cg11013060	Retina	4.66311e-08	0.000557	0.316755	0.0550155	0.016833	0.058086	SAME	0.899089	0.446135	chr7:99959594	FALSE	FALSE
AMD EUR	chr7:100393925:C:T	chr7:100393925:C:T	T	C	rs7803454	0.122218	0.122218	4.8e-09	99914532	100638465	723.933	453	mQTL	chr7:99959594:T:C	rs6962405	ENSG00000222852	Y_RNA	cg11013060	Retina	4.66311e-08	0.000557	0.316755	0.0550155	0.016833	0.058086	SAME	0.899089	0.446135	chr7:99959594	FALSE	FALSE
AMD EUR	chr7:100393925:C:T	chr7:100393925:C:T	T	C	rs7803454	0.122218	0.122218	4.8e-09	99914532	100638465	723.933	453	mQTL	chr7:99959594:T:C	rs6962405	ENSG00000222881	Y_RNA	cg11013060	Retina	4.66311e-08	0.000557	0.316755	0.0550155	0.016833	0.058086	SAME	0.899089	0.446135	chr7:99959594	FALSE	FALSE
AMD EUR	chr7:100393925:C:T	chr7:100393925:C:T	T	C	rs7803454	0.122218	0.122218	4.8e-09	99914532	100638465	723.933	453	mQTL	chr7:99959594:T:C	rs6962405	ENSG00000222883	Y_RNA	cg11013060	Retina	4.66311e-08	0.000557	0.316755	0.0550155	0.016833	0.058086	SAME	0.899089	0.446135	chr7:99959594	FALSE	FALSE
AMD EUR	chr7:100393925:C:T	chr7:100393925:C:T	T	C	rs7803454	0.122218	0.122218	4.8e-09	99914532	100638465	723.933	453	mQTL	chr7:99959594:T:C	rs6962405	ENSG00000222941	Y_RNA	cg11013060	Retina	4.66311e-08	0.000557	0.316755	0.0550155	0.016833	0.058086	SAME	0.899089	0.446135	chr7:99959594	FALSE	FALSE
AMD EUR	chr7:100393925:C:T	chr7:100393925:C:T	T	C	rs7803454	0.122218	0.122218	4.8e-09	99914532	100638465	723.933	453	mQTL	chr7:99959594:T:C	rs6962405	ENSG00000222997	Y_RNA	cg11013060	Retina	4.66311e-08	0.000557	0.316755	0.0550155	0.016833	0.058086	SAME	0.899089	0.446135	chr7:99959594	FALSE	FALSE
AMD EUR	chr7:100393925:C:T	chr7:100393925:C:T	T	C	rs7803454	0.122218	0.122218	4.8e-09	99914532	100638465	723.933	453	mQTL	chr7:99959594:T:C	rs6962405	ENSG00000223023	Y_RNA	cg11013060	Retina	4.66311e-08	0.000557	0.316755	0.0550155	0.016833	0.058086	SAME	0.899089	0.446135	chr7:99959594	FALSE	FALSE
AMD EUR	chr7:100393925:C:T	chr7:100393925:C:T	T	C	rs7803454	0.122218	0.122218	4.8e-09	99914532	100638465	723.933	453	mQTL	chr7:99959594:T:C	rs6962405	ENSG00000223060	Y_RNA	cg11013060	Retina	4.66311e-08	0.000557	0.316755	0.0550155	0.016833	0.058086	SAME	0.899089	0.446135	chr7:99959594	FALSE	FALSE
AMD EUR	chr7:100393925:C:T	chr7:100393925:C:T	T	C	rs7803454	0.122218	0.122218	4.8e-09	99914532	100638465	723.933	453	mQTL	chr7:99959594:T:C	rs6962405	ENSG00000223080	Y_RNA	cg11013060	Retina	4.66311e-08	0.000557	0.316755	0.0550155	0.016833	0.058086	SAME	0.899089	0.446135	chr7:99959594	FALSE	FALSE
AMD EUR	chr7:100393925:C:T	chr7:100393925:C:T	T	C	rs7803454	0.122218	0.122218	4.8e-09	99914532	100638465	723.933	453	mQTL	chr7:99959594:T:C	rs6962405	ENSG00000223188	Y_RNA	cg11013060	Retina	4.66311e-08	0.000557	0.316755	0.0550155	0.016833	0.058086	SAME	0.899089	0.446135	chr7:99959594	FALSE	FALSE
AMD EUR	chr7:100393925:C:T	chr7:100393925:C:T	T	C	rs7803454	0.122218	0.122218	4.8e-09	99914532	100638465	723.933	453	mQTL	chr7:99959594:T:C	rs6962405	ENSG00000223220	Y_RNA	cg11013060	Retina	4.66311e-08	0.000557	0.316755	0.0550155	0.016833	0.058086	SAME	0.899089	0.446135	chr7:99959594	FALSE	FALSE
AMD EUR	chr7:100393925:C:T	chr7:100393925:C:T	T	C	rs7803454	0.122218	0.122218	4.8e-09	99914532	100638465	723.933	453	mQTL	chr7:99959594:T:C	rs6962405	ENSG00000223254	Y_RNA	cg11013060	Retina	4.66311e-08	0.000557	0.316755	0.0550155	0.016833	0.058086	SAME	0.899089	0.446135	chr7:99959594	FALSE	FALSE
AMD EUR	chr7:100393925:C:T	chr7:100393925:C:T	T	C	rs7803454	0.122218	0.122218	4.8e-09	99914532	100638465	723.933	453	mQTL	chr7:99959594:T:C	rs6962405	ENSG00000223271	Y_RNA	cg11013060	Retina	4.66311e-08	0.000557	0.316755	0.0550155	0.016833	0.058086	SAME	0.899089	0.446135	chr7:99959594	FALSE	FALSE
AMD EUR	chr7:100393925:C:T	chr7:100393925:C:T	T	C	rs7803454	0.122218	0.122218	4.8e-09	99914532	100638465	723.933	453	mQTL	chr7:99959594:T:C	rs6962405	ENSG00000223300	Y_RNA	cg11013060	Retina	4.66311e-08	0.000557	0.316755	0.0550155	0.016833	0.058086	SAME	0.899089	0.446135	chr7:99959594	FALSE	FALSE
AMD EUR	chr7:100393925:C:T	chr7:100393925:C:T	T	C	rs7803454	0.122218	0.122218	4.8e-09	99914532	100638465	723.933	453	mQTL	chr7:99959594:T:C	rs6962405	ENSG00000223302	Y_RNA	cg11013060	Retina	4.66311e-08	0.000557	0.316755	0.0550155	0.016833	0.058086	SAME	0.899089	0.446135	chr7:99959594	FALSE	FALSE
AMD EUR	chr7:100393925:C:T	chr7:100393925:C:T	T	C	rs7803454	0.122218	0.122218	4.8e-09	99914532	100638465	723.933	453	mQTL	chr7:99959594:T:C	rs6962405	ENSG00000237640	RP4-604G5.1	cg11013060	Retina	4.66311e-08	0.000557	0.316755	0.0550155	0.016833	0.058086	SAME	0.899089	0.446135	chr7:99959594	FALSE	FALSE
AMD EUR	chr7:100393925:C:T	chr7:100393925:C:T	T	C	rs7803454	0.122218	0.122218	4.8e-09	99914532	100638465	723.933	453	mQTL	chr7:99959594:T:C	rs6962405	ENSG00000238366	Y_RNA	cg11013060	Retina	4.66311e-08	0.000557	0.316755	0.0550155	0.016833	0.058086	SAME	0.899089	0.446135	chr7:99959594	FALSE	FALSE
AMD EUR	chr7:100393925:C:T	chr7:100393925:C:T	T	C	rs7803454	0.122218	0.122218	4.8e-09	99914532	100638465	723.933	453	mQTL	chr7:99959594:T:C	rs6962405	ENSG00000238426	Y_RNA	cg11013060	Retina	4.66311e-08	0.000557	0.316755	0.0550155	0.016833	0.058086	SAME	0.899089	0.446135	chr7:99959594	FALSE	FALSE
AMD EUR	chr7:100393925:C:T	chr7:100393925:C:T	T	C	rs7803454	0.122218	0.122218	4.8e-09	99914532	100638465	723.933	453	mQTL	chr7:99959594:T:C	rs6962405	ENSG00000238443	Y_RNA	cg11013060	Retina	4.66311e-08	0.000557	0.316755	0.0550155	0.016833	0.058086	SAME	0.899089	0.446135	chr7:99959594	FALSE	FALSE
AMD EUR	chr7:100393925:C:T	chr7:100393925:C:T	T	C	rs7803454	0.122218	0.122218	4.8e-09	99914532	100638465	723.933	453	mQTL	chr7:99959594:T:C	rs6962405	ENSG00000238490	Y_RNA	cg11013060	Retina	4.66311e-08	0.000557	0.316755	0.0550155	0.016833	0.058086	SAME	0.899089	0.446135	chr7:99959594	FALSE	FALSE
AMD EUR	chr7:100393925:C:T	chr7:100393925:C:T	T	C	rs7803454	0.122218	0.122218	4.8e-09	99914532	100638465	723.933	453	mQTL	chr7:99959594:T:C	rs6962405	ENSG00000238516	Y_RNA	cg11013060	Retina	4.66311e-08	0.000557	0.316755	0.0550155	0.016833	0.058086	SAME	0.899089	0.446135	chr7:99959594	FALSE	FALSE
AMD EUR	chr7:100393925:C:T	chr7:100393925:C:T	T	C	rs7803454	0.122218	0.122218	4.8e-09	99914532	100638465	723.933	453	mQTL	chr7:99959594:T:C	rs6962405	ENSG00000238560	Y_RNA	cg11013060	Retina	4.66311e-08	0.000557	0.316755	0.0550155	0.016833	0.058086	SAME	0.899089	0.446135	chr7:99959594	FALSE	FALSE
AMD EUR	chr7:100393925:C:T	chr7:100393925:C:T	T	C	rs7803454	0.122218	0.122218	4.8e-09	99914532	100638465	723.933	453	mQTL	chr7:99959594:T:C	rs6962405	ENSG00000238585	Y_RNA	cg11013060	Retina	4.66311e-08	0.000557	0.316755	0.0550155	0.016833	0.058086	SAME	0.899089	0.446135	chr7:99959594	FALSE	FALSE
AMD EUR	chr7:100393925:C:T	chr7:100393925:C:T	T	C	rs7803454	0.122218	0.122218	4.8e-09	99914532	100638465	723.933	453	mQTL	chr7:99959594:T:C	rs6962405	ENSG00000238713	Y_RNA	cg11013060	Retina	4.66311e-08	0.000557	0.316755	0.0550155	0.016833	0.058086	SAME	0.899089	0.446135	chr7:99959594	FALSE	FALSE
AMD EUR	chr7:100393925:C:T	chr7:100393925:C:T	T	C	rs7803454	0.122218	0.122218	4.8e-09	99914532	100638465	723.933	453	mQTL	chr7:99959594:T:C	rs6962405	ENSG00000238723	Y_RNA	cg11013060	Retina	4.66311e-08	0.000557	0.316755	0.0550155	0.016833	0.058086	SAME	0.899089	0.446135	chr7:99959594	FALSE	FALSE
AMD EUR	chr7:100393925:C:T	chr7:100393925:C:T	T	C	rs7803454	0.122218	0.122218	4.8e-09	99914532	100638465	723.933	453	mQTL	chr7:99959594:T:C	rs6962405	ENSG00000238749	Y_RNA	cg11013060	Retina	4.66311e-08	0.000557	0.316755	0.0550155	0.016833	0.058086	SAME	0.899089	0.446135	chr7:99959594	FALSE	FALSE
AMD EUR	chr7:100393925:C:T	chr7:100393925:C:T	T	C	rs7803454	0.122218	0.122218	4.8e-09	99914532	100638465	723.933	453	mQTL	chr7:99959594:T:C	rs6962405	ENSG00000238783	Y_RNA	cg11013060	Retina	4.66311e-08	0.000557	0.316755	0.0550155	0.016833	0.058086	SAME	0.899089	0.446135	chr7:99959594	FALSE	FALSE
AMD EUR	chr7:100393925:C:T	chr7:100393925:C:T	T	C	rs7803454	0.122218	0.122218	4.8e-09	99914532	100638465	723.933	453	mQTL	chr7:99959594:T:C	rs6962405	ENSG00000238797	Y_RNA	cg11013060	Retina	4.66311e-08	0.000557	0.316755	0.0550155	0.016833	0.058086	SAME	0.899089	0.446135	chr7:99959594	FALSE	FALSE
AMD EUR	chr7:100393925:C:T	chr7:100393925:C:T	T	C	rs7803454	0.122218	0.122218	4.8e-09	99914532	100638465	723.933	453	mQTL	chr7:99959594:T:C	rs6962405	ENSG00000238813	Y_RNA	cg11013060	Retina	4.66311e-08	0.000557	0.316755	0.0550155	0.016833	0.058086	SAME	0.899089	0.446135	chr7:99959594	FALSE	FALSE
AMD EUR	chr7:100393925:C:T	chr7:100393925:C:T	T	C	rs7803454	0.122218	0.122218	4.8e-09	99914532	100638465	723.933	453	mQTL	chr7:99959594:T:C	rs6962405	ENSG00000238845	Y_RNA	cg11013060	Retina	4.66311e-08	0.000557	0.316755	0.0550155	0.016833	0.058086	SAME	0.899089	0.446135	chr7:99959594	FALSE	FALSE
AMD EUR	chr7:100393925:C:T	chr7:100393925:C:T	T	C	rs7803454	0.122218	0.122218	4.8e-09	99914532	100638465	723.933	453	mQTL	chr7:99959594:T:C	rs6962405	ENSG00000238912	Y_RNA	cg11013060	Retina	4.66311e-08	0.000557	0.316755	0.0550155	0.016833	0.058086	SAME	0.899089	0.446135	chr7:99959594	FALSE	FALSE
AMD EUR	chr7:100393925:C:T	chr7:100393925:C:T	T	C	rs7803454	0.122218	0.122218	4.8e-09	99914532	100638465	723.933	453	mQTL	chr7:99959594:T:C	rs6962405	ENSG00000238926	Y_RNA	cg11013060	Retina	4.66311e-08	0.000557	0.316755	0.0550155	0.016833	0.058086	SAME	0.899089	0.446135	chr7:99959594	FALSE	FALSE
AMD EUR	chr7:100393925:C:T	chr7:100393925:C:T	T	C	rs7803454	0.122218	0.122218	4.8e-09	99914532	100638465	723.933	453	mQTL	chr7:99959594:T:C	rs6962405	ENSG00000238933	Y_RNA	cg11013060	Retina	4.66311e-08	0.000557	0.316755	0.0550155	0.016833	0.058086	SAME	0.899089	0.446135	chr7:99959594	FALSE	FALSE
AMD EUR	chr7:100393925:C:T	chr7:100393925:C:T	T	C	rs7803454	0.122218	0.122218	4.8e-09	99914532	100638465	723.933	453	mQTL	chr7:99959594:T:C	rs6962405	ENSG00000238943	Y_RNA	cg11013060	Retina	4.66311e-08	0.000557	0.316755	0.0550155	0.016833	0.058086	SAME	0.899089	0.446135	chr7:99959594	FALSE	FALSE
AMD EUR	chr7:100393925:C:T	chr7:100393925:C:T	T	C	rs7803454	0.122218	0.122218	4.8e-09	99914532	100638465	723.933	453	mQTL	chr7:99959594:T:C	rs6962405	ENSG00000239040	Y_RNA	cg11013060	Retina	4.66311e-08	0.000557	0.316755	0.0550155	0.016833	0.058086	SAME	0.899089	0.446135	chr7:99959594	FALSE	FALSE
AMD EUR	chr7:100393925:C:T	chr7:100393925:C:T	T	C	rs7803454	0.122218	0.122218	4.8e-09	99914532	100638465	723.933	453	mQTL	chr7:99959594:T:C	rs6962405	ENSG00000239069	Y_RNA	cg11013060	Retina	4.66311e-08	0.000557	0.316755	0.0550155	0.016833	0.058086	SAME	0.899089	0.446135	chr7:99959594	FALSE	FALSE
AMD EUR	chr7:100393925:C:T	chr7:100393925:C:T	T	C	rs7803454	0.122218	0.122218	4.8e-09	99914532	100638465	723.933	453	mQTL	chr7:99959594:T:C	rs6962405	ENSG00000239106	Y_RNA	cg11013060	Retina	4.66311e-08	0.000557	0.316755	0.0550155	0.016833	0.058086	SAME	0.899089	0.446135	chr7:99959594	FALSE	FALSE
AMD EUR	chr7:100393925:C:T	chr7:100393925:C:T	T	C	rs7803454	0.122218	0.122218	4.8e-09	99914532	100638465	723.933	453	mQTL	chr7:99959594:T:C	rs6962405	ENSG00000239143	Y_RNA	cg11013060	Retina	4.66311e-08	0.000557	0.316755	0.0550155	0.016833	0.058086	SAME	0.899089	0.446135	chr7:99959594	FALSE	FALSE
AMD EUR	chr7:100393925:C:T	chr7:100393925:C:T	T	C	rs7803454	0.122218	0.122218	4.8e-09	99914532	100638465	723.933	453	mQTL	chr7:99959594:T:C	rs6962405	ENSG00000239180	Y_RNA	cg11013060	Retina	4.66311e-08	0.000557	0.316755	0.0550155	0.016833	0.058086	SAME	0.899089	0.446135	chr7:99959594	FALSE	FALSE
AMD EUR	chr7:100393925:C:T	chr7:100393925:C:T	T	C	rs7803454	0.122218	0.122218	4.8e-09	99914532	100638465	723.933	453	mQTL	chr7:99959594:T:C	rs6962405	ENSG00000239823	Y_RNA	cg11013060	Retina	4.66311e-08	0.000557	0.316755	0.0550155	0.016833	0.058086	SAME	0.899089	0.446135	chr7:99959594	FALSE	FALSE
AMD EUR	chr7:100393925:C:T	chr7:100393925:C:T	T	C	rs7803454	0.122218	0.122218	4.8e-09	99914532	100638465	723.933	453	mQTL	chr7:99959594:T:C	rs6962405	ENSG00000251728	Y_RNA	cg11013060	Retina	4.66311e-08	0.000557	0.316755	0.0550155	0.016833	0.058086	SAME	0.899089	0.446135	chr7:99959594	FALSE	FALSE
AMD EUR	chr7:100393925:C:T	chr7:100393925:C:T	T	C	rs7803454	0.122218	0.122218	4.8e-09	99914532	100638465	723.933	453	mQTL	chr7:99959594:T:C	rs6962405	ENSG00000251779	Y_RNA	cg11013060	Retina	4.66311e-08	0.000557	0.316755	0.0550155	0.016833	0.058086	SAME	0.899089	0.446135	chr7:99959594	FALSE	FALSE
AMD EUR	chr7:100393925:C:T	chr7:100393925:C:T	T	C	rs7803454	0.122218	0.122218	4.8e-09	99914532	100638465	723.933	453	mQTL	chr7:99959594:T:C	rs6962405	ENSG00000251792	Y_RNA	cg11013060	Retina	4.66311e-08	0.000557	0.316755	0.0550155	0.016833	0.058086	SAME	0.899089	0.446135	chr7:99959594	FALSE	FALSE
AMD EUR	chr7:100393925:C:T	chr7:100393925:C:T	T	C	rs7803454	0.122218	0.122218	4.8e-09	99914532	100638465	723.933	453	mQTL	chr7:99959594:T:C	rs6962405	ENSG00000251799	Y_RNA	cg11013060	Retina	4.66311e-08	0.000557	0.316755	0.0550155	0.016833	0.058086	SAME	0.899089	0.446135	chr7:99959594	FALSE	FALSE
AMD EUR	chr7:100393925:C:T	chr7:100393925:C:T	T	C	rs7803454	0.122218	0.122218	4.8e-09	99914532	100638465	723.933	453	mQTL	chr7:99959594:T:C	rs6962405	ENSG00000251803	Y_RNA	cg11013060	Retina	4.66311e-08	0.000557	0.316755	0.0550155	0.016833	0.058086	SAME	0.899089	0.446135	chr7:99959594	FALSE	FALSE
AMD EUR	chr7:100393925:C:T	chr7:100393925:C:T	T	C	rs7803454	0.122218	0.122218	4.8e-09	99914532	100638465	723.933	453	mQTL	chr7:99959594:T:C	rs6962405	ENSG00000251811	Y_RNA	cg11013060	Retina	4.66311e-08	0.000557	0.316755	0.0550155	0.016833	0.058086	SAME	0.899089	0.446135	chr7:99959594	FALSE	FALSE
AMD EUR	chr7:100393925:C:T	chr7:100393925:C:T	T	C	rs7803454	0.122218	0.122218	4.8e-09	99914532	100638465	723.933	453	mQTL	chr7:99959594:T:C	rs6962405	ENSG00000251812	Y_RNA	cg11013060	Retina	4.66311e-08	0.000557	0.316755	0.0550155	0.016833	0.058086	SAME	0.899089	0.446135	chr7:99959594	FALSE	FALSE
AMD EUR	chr7:100393925:C:T	chr7:100393925:C:T	T	C	rs7803454	0.122218	0.122218	4.8e-09	99914532	100638465	723.933	453	mQTL	chr7:99959594:T:C	rs6962405	ENSG00000251837	Y_RNA	cg11013060	Retina	4.66311e-08	0.000557	0.316755	0.0550155	0.016833	0.058086	SAME	0.899089	0.446135	chr7:99959594	FALSE	FALSE
AMD EUR	chr7:100393925:C:T	chr7:100393925:C:T	T	C	rs7803454	0.122218	0.122218	4.8e-09	99914532	100638465	723.933	453	mQTL	chr7:99959594:T:C	rs6962405	ENSG00000251852	Y_RNA	cg11013060	Retina	4.66311e-08	0.000557	0.316755	0.0550155	0.016833	0.058086	SAME	0.899089	0.446135	chr7:99959594	FALSE	FALSE
AMD EUR	chr7:100393925:C:T	chr7:100393925:C:T	T	C	rs7803454	0.122218	0.122218	4.8e-09	99914532	100638465	723.933	453	mQTL	chr7:99959594:T:C	rs6962405	ENSG00000251864	Y_RNA	cg11013060	Retina	4.66311e-08	0.000557	0.316755	0.0550155	0.016833	0.058086	SAME	0.899089	0.446135	chr7:99959594	FALSE	FALSE
AMD EUR	chr7:100393925:C:T	chr7:100393925:C:T	T	C	rs7803454	0.122218	0.122218	4.8e-09	99914532	100638465	723.933	453	mQTL	chr7:99959594:T:C	rs6962405	ENSG00000251986	Y_RNA	cg11013060	Retina	4.66311e-08	0.000557	0.316755	0.0550155	0.016833	0.058086	SAME	0.899089	0.446135	chr7:99959594	FALSE	FALSE
AMD EUR	chr7:100393925:C:T	chr7:100393925:C:T	T	C	rs7803454	0.122218	0.122218	4.8e-09	99914532	100638465	723.933	453	mQTL	chr7:99959594:T:C	rs6962405	ENSG00000252021	Y_RNA	cg11013060	Retina	4.66311e-08	0.000557	0.316755	0.0550155	0.016833	0.058086	SAME	0.899089	0.446135	chr7:99959594	FALSE	FALSE
AMD EUR	chr7:100393925:C:T	chr7:100393925:C:T	T	C	rs7803454	0.122218	0.122218	4.8e-09	99914532	100638465	723.933	453	mQTL	chr7:99959594:T:C	rs6962405	ENSG00000252042	Y_RNA	cg11013060	Retina	4.66311e-08	0.000557	0.316755	0.0550155	0.016833	0.058086	SAME	0.899089	0.446135	chr7:99959594	FALSE	FALSE
AMD EUR	chr7:100393925:C:T	chr7:100393925:C:T	T	C	rs7803454	0.122218	0.122218	4.8e-09	99914532	100638465	723.933	453	mQTL	chr7:99959594:T:C	rs6962405	ENSG00000252047	Y_RNA	cg11013060	Retina	4.66311e-08	0.000557	0.316755	0.0550155	0.016833	0.058086	SAME	0.899089	0.446135	chr7:99959594	FALSE	FALSE
AMD EUR	chr7:100393925:C:T	chr7:100393925:C:T	T	C	rs7803454	0.122218	0.122218	4.8e-09	99914532	100638465	723.933	453	mQTL	chr7:99959594:T:C	rs6962405	ENSG00000252064	Y_RNA	cg11013060	Retina	4.66311e-08	0.000557	0.316755	0.0550155	0.016833	0.058086	SAME	0.899089	0.446135	chr7:99959594	FALSE	FALSE
AMD EUR	chr7:100393925:C:T	chr7:100393925:C:T	T	C	rs7803454	0.122218	0.122218	4.8e-09	99914532	100638465	723.933	453	mQTL	chr7:99959594:T:C	rs6962405	ENSG00000252069	Y_RNA	cg11013060	Retina	4.66311e-08	0.000557	0.316755	0.0550155	0.016833	0.058086	SAME	0.899089	0.446135	chr7:99959594	FALSE	FALSE
AMD EUR	chr7:100393925:C:T	chr7:100393925:C:T	T	C	rs7803454	0.122218	0.122218	4.8e-09	99914532	100638465	723.933	453	mQTL	chr7:99959594:T:C	rs6962405	ENSG00000252098	Y_RNA	cg11013060	Retina	4.66311e-08	0.000557	0.316755	0.0550155	0.016833	0.058086	SAME	0.899089	0.446135	chr7:99959594	FALSE	FALSE
AMD EUR	chr7:100393925:C:T	chr7:100393925:C:T	T	C	rs7803454	0.122218	0.122218	4.8e-09	99914532	100638465	723.933	453	mQTL	chr7:99959594:T:C	rs6962405	ENSG00000252115	Y_RNA	cg11013060	Retina	4.66311e-08	0.000557	0.316755	0.0550155	0.016833	0.058086	SAME	0.899089	0.446135	chr7:99959594	FALSE	FALSE
AMD EUR	chr7:100393925:C:T	chr7:100393925:C:T	T	C	rs7803454	0.122218	0.122218	4.8e-09	99914532	100638465	723.933	453	mQTL	chr7:99959594:T:C	rs6962405	ENSG00000252171	Y_RNA	cg11013060	Retina	4.66311e-08	0.000557	0.316755	0.0550155	0.016833	0.058086	SAME	0.899089	0.446135	chr7:99959594	FALSE	FALSE
AMD EUR	chr7:100393925:C:T	chr7:100393925:C:T	T	C	rs7803454	0.122218	0.122218	4.8e-09	99914532	100638465	723.933	453	mQTL	chr7:99959594:T:C	rs6962405	ENSG00000252198	Y_RNA	cg11013060	Retina	4.66311e-08	0.000557	0.316755	0.0550155	0.016833	0.058086	SAME	0.899089	0.446135	chr7:99959594	FALSE	FALSE
AMD EUR	chr7:100393925:C:T	chr7:100393925:C:T	T	C	rs7803454	0.122218	0.122218	4.8e-09	99914532	100638465	723.933	453	mQTL	chr7:99959594:T:C	rs6962405	ENSG00000252202	Y_RNA	cg11013060	Retina	4.66311e-08	0.000557	0.316755	0.0550155	0.016833	0.058086	SAME	0.899089	0.446135	chr7:99959594	FALSE	FALSE
AMD EUR	chr7:100393925:C:T	chr7:100393925:C:T	T	C	rs7803454	0.122218	0.122218	4.8e-09	99914532	100638465	723.933	453	mQTL	chr7:99959594:T:C	rs6962405	ENSG00000252210	Y_RNA	cg11013060	Retina	4.66311e-08	0.000557	0.316755	0.0550155	0.016833	0.058086	SAME	0.899089	0.446135	chr7:99959594	FALSE	FALSE
AMD EUR	chr7:100393925:C:T	chr7:100393925:C:T	T	C	rs7803454	0.122218	0.122218	4.8e-09	99914532	100638465	723.933	453	mQTL	chr7:99959594:T:C	rs6962405	ENSG00000252217	Y_RNA	cg11013060	Retina	4.66311e-08	0.000557	0.316755	0.0550155	0.016833	0.058086	SAME	0.899089	0.446135	chr7:99959594	FALSE	FALSE
AMD EUR	chr7:100393925:C:T	chr7:100393925:C:T	T	C	rs7803454	0.122218	0.122218	4.8e-09	99914532	100638465	723.933	453	mQTL	chr7:99959594:T:C	rs6962405	ENSG00000252225	Y_RNA	cg11013060	Retina	4.66311e-08	0.000557	0.316755	0.0550155	0.016833	0.058086	SAME	0.899089	0.446135	chr7:99959594	FALSE	FALSE
AMD EUR	chr7:100393925:C:T	chr7:100393925:C:T	T	C	rs7803454	0.122218	0.122218	4.8e-09	99914532	100638465	723.933	453	mQTL	chr7:99959594:T:C	rs6962405	ENSG00000252250	Y_RNA	cg11013060	Retina	4.66311e-08	0.000557	0.316755	0.0550155	0.016833	0.058086	SAME	0.899089	0.446135	chr7:99959594	FALSE	FALSE
AMD EUR	chr7:100393925:C:T	chr7:100393925:C:T	T	C	rs7803454	0.122218	0.122218	4.8e-09	99914532	100638465	723.933	453	mQTL	chr7:99959594:T:C	rs6962405	ENSG00000252254	Y_RNA	cg11013060	Retina	4.66311e-08	0.000557	0.316755	0.0550155	0.016833	0.058086	SAME	0.899089	0.446135	chr7:99959594	FALSE	FALSE
AMD EUR	chr7:100393925:C:T	chr7:100393925:C:T	T	C	rs7803454	0.122218	0.122218	4.8e-09	99914532	100638465	723.933	453	mQTL	chr7:99959594:T:C	rs6962405	ENSG00000252266	Y_RNA	cg11013060	Retina	4.66311e-08	0.000557	0.316755	0.0550155	0.016833	0.058086	SAME	0.899089	0.446135	chr7:99959594	FALSE	FALSE
AMD EUR	chr7:100393925:C:T	chr7:100393925:C:T	T	C	rs7803454	0.122218	0.122218	4.8e-09	99914532	100638465	723.933	453	mQTL	chr7:99959594:T:C	rs6962405	ENSG00000252317	Y_RNA	cg11013060	Retina	4.66311e-08	0.000557	0.316755	0.0550155	0.016833	0.058086	SAME	0.899089	0.446135	chr7:99959594	FALSE	FALSE
AMD EUR	chr7:100393925:C:T	chr7:100393925:C:T	T	C	rs7803454	0.122218	0.122218	4.8e-09	99914532	100638465	723.933	453	mQTL	chr7:99959594:T:C	rs6962405	ENSG00000252319	Y_RNA	cg11013060	Retina	4.66311e-08	0.000557	0.316755	0.0550155	0.016833	0.058086	SAME	0.899089	0.446135	chr7:99959594	FALSE	FALSE
AMD EUR	chr7:100393925:C:T	chr7:100393925:C:T	T	C	rs7803454	0.122218	0.122218	4.8e-09	99914532	100638465	723.933	453	mQTL	chr7:99959594:T:C	rs6962405	ENSG00000252341	Y_RNA	cg11013060	Retina	4.66311e-08	0.000557	0.316755	0.0550155	0.016833	0.058086	SAME	0.899089	0.446135	chr7:99959594	FALSE	FALSE
AMD EUR	chr7:100393925:C:T	chr7:100393925:C:T	T	C	rs7803454	0.122218	0.122218	4.8e-09	99914532	100638465	723.933	453	mQTL	chr7:99959594:T:C	rs6962405	ENSG00000252357	Y_RNA	cg11013060	Retina	4.66311e-08	0.000557	0.316755	0.0550155	0.016833	0.058086	SAME	0.899089	0.446135	chr7:99959594	FALSE	FALSE
AMD EUR	chr7:100393925:C:T	chr7:100393925:C:T	T	C	rs7803454	0.122218	0.122218	4.8e-09	99914532	100638465	723.933	453	mQTL	chr7:99959594:T:C	rs6962405	ENSG00000252367	Y_RNA	cg11013060	Retina	4.66311e-08	0.000557	0.316755	0.0550155	0.016833	0.058086	SAME	0.899089	0.446135	chr7:99959594	FALSE	FALSE
AMD EUR	chr7:100393925:C:T	chr7:100393925:C:T	T	C	rs7803454	0.122218	0.122218	4.8e-09	99914532	100638465	723.933	453	mQTL	chr7:99959594:T:C	rs6962405	ENSG00000252374	Y_RNA	cg11013060	Retina	4.66311e-08	0.000557	0.316755	0.0550155	0.016833	0.058086	SAME	0.899089	0.446135	chr7:99959594	FALSE	FALSE
AMD EUR	chr7:100393925:C:T	chr7:100393925:C:T	T	C	rs7803454	0.122218	0.122218	4.8e-09	99914532	100638465	723.933	453	mQTL	chr7:99959594:T:C	rs6962405	ENSG00000252398	Y_RNA	cg11013060	Retina	4.66311e-08	0.000557	0.316755	0.0550155	0.016833	0.058086	SAME	0.899089	0.446135	chr7:99959594	FALSE	FALSE
AMD EUR	chr7:100393925:C:T	chr7:100393925:C:T	T	C	rs7803454	0.122218	0.122218	4.8e-09	99914532	100638465	723.933	453	mQTL	chr7:99959594:T:C	rs6962405	ENSG00000252412	Y_RNA	cg11013060	Retina	4.66311e-08	0.000557	0.316755	0.0550155	0.016833	0.058086	SAME	0.899089	0.446135	chr7:99959594	FALSE	FALSE
AMD EUR	chr7:100393925:C:T	chr7:100393925:C:T	T	C	rs7803454	0.122218	0.122218	4.8e-09	99914532	100638465	723.933	453	mQTL	chr7:99959594:T:C	rs6962405	ENSG00000252420	Y_RNA	cg11013060	Retina	4.66311e-08	0.000557	0.316755	0.0550155	0.016833	0.058086	SAME	0.899089	0.446135	chr7:99959594	FALSE	FALSE
AMD EUR	chr7:100393925:C:T	chr7:100393925:C:T	T	C	rs7803454	0.122218	0.122218	4.8e-09	99914532	100638465	723.933	453	mQTL	chr7:99959594:T:C	rs6962405	ENSG00000252436	Y_RNA	cg11013060	Retina	4.66311e-08	0.000557	0.316755	0.0550155	0.016833	0.058086	SAME	0.899089	0.446135	chr7:99959594	FALSE	FALSE
AMD EUR	chr7:100393925:C:T	chr7:100393925:C:T	T	C	rs7803454	0.122218	0.122218	4.8e-09	99914532	100638465	723.933	453	mQTL	chr7:99959594:T:C	rs6962405	ENSG00000252450	Y_RNA	cg11013060	Retina	4.66311e-08	0.000557	0.316755	0.0550155	0.016833	0.058086	SAME	0.899089	0.446135	chr7:99959594	FALSE	FALSE
AMD EUR	chr7:100393925:C:T	chr7:100393925:C:T	T	C	rs7803454	0.122218	0.122218	4.8e-09	99914532	100638465	723.933	453	mQTL	chr7:99959594:T:C	rs6962405	ENSG00000252486	Y_RNA	cg11013060	Retina	4.66311e-08	0.000557	0.316755	0.0550155	0.016833	0.058086	SAME	0.899089	0.446135	chr7:99959594	FALSE	FALSE
AMD EUR	chr7:100393925:C:T	chr7:100393925:C:T	T	C	rs7803454	0.122218	0.122218	4.8e-09	99914532	100638465	723.933	453	mQTL	chr7:99959594:T:C	rs6962405	ENSG00000252524	Y_RNA	cg11013060	Retina	4.66311e-08	0.000557	0.316755	0.0550155	0.016833	0.058086	SAME	0.899089	0.446135	chr7:99959594	FALSE	FALSE
AMD EUR	chr7:100393925:C:T	chr7:100393925:C:T	T	C	rs7803454	0.122218	0.122218	4.8e-09	99914532	100638465	723.933	453	mQTL	chr7:99959594:T:C	rs6962405	ENSG00000252534	Y_RNA	cg11013060	Retina	4.66311e-08	0.000557	0.316755	0.0550155	0.016833	0.058086	SAME	0.899089	0.446135	chr7:99959594	FALSE	FALSE
AMD EUR	chr7:100393925:C:T	chr7:100393925:C:T	T	C	rs7803454	0.122218	0.122218	4.8e-09	99914532	100638465	723.933	453	mQTL	chr7:99959594:T:C	rs6962405	ENSG00000252585	Y_RNA	cg11013060	Retina	4.66311e-08	0.000557	0.316755	0.0550155	0.016833	0.058086	SAME	0.899089	0.446135	chr7:99959594	FALSE	FALSE
AMD EUR	chr7:100393925:C:T	chr7:100393925:C:T	T	C	rs7803454	0.122218	0.122218	4.8e-09	99914532	100638465	723.933	453	mQTL	chr7:99959594:T:C	rs6962405	ENSG00000252607	Y_RNA	cg11013060	Retina	4.66311e-08	0.000557	0.316755	0.0550155	0.016833	0.058086	SAME	0.899089	0.446135	chr7:99959594	FALSE	FALSE
AMD EUR	chr7:100393925:C:T	chr7:100393925:C:T	T	C	rs7803454	0.122218	0.122218	4.8e-09	99914532	100638465	723.933	453	mQTL	chr7:99959594:T:C	rs6962405	ENSG00000252612	Y_RNA	cg11013060	Retina	4.66311e-08	0.000557	0.316755	0.0550155	0.016833	0.058086	SAME	0.899089	0.446135	chr7:99959594	FALSE	FALSE
AMD EUR	chr7:100393925:C:T	chr7:100393925:C:T	T	C	rs7803454	0.122218	0.122218	4.8e-09	99914532	100638465	723.933	453	mQTL	chr7:99959594:T:C	rs6962405	ENSG00000252615	Y_RNA	cg11013060	Retina	4.66311e-08	0.000557	0.316755	0.0550155	0.016833	0.058086	SAME	0.899089	0.446135	chr7:99959594	FALSE	FALSE
AMD EUR	chr7:100393925:C:T	chr7:100393925:C:T	T	C	rs7803454	0.122218	0.122218	4.8e-09	99914532	100638465	723.933	453	mQTL	chr7:99959594:T:C	rs6962405	ENSG00000252621	Y_RNA	cg11013060	Retina	4.66311e-08	0.000557	0.316755	0.0550155	0.016833	0.058086	SAME	0.899089	0.446135	chr7:99959594	FALSE	FALSE
AMD EUR	chr7:100393925:C:T	chr7:100393925:C:T	T	C	rs7803454	0.122218	0.122218	4.8e-09	99914532	100638465	723.933	453	mQTL	chr7:99959594:T:C	rs6962405	ENSG00000252652	Y_RNA	cg11013060	Retina	4.66311e-08	0.000557	0.316755	0.0550155	0.016833	0.058086	SAME	0.899089	0.446135	chr7:99959594	FALSE	FALSE
AMD EUR	chr7:100393925:C:T	chr7:100393925:C:T	T	C	rs7803454	0.122218	0.122218	4.8e-09	99914532	100638465	723.933	453	mQTL	chr7:99959594:T:C	rs6962405	ENSG00000252655	Y_RNA	cg11013060	Retina	4.66311e-08	0.000557	0.316755	0.0550155	0.016833	0.058086	SAME	0.899089	0.446135	chr7:99959594	FALSE	FALSE
AMD EUR	chr7:100393925:C:T	chr7:100393925:C:T	T	C	rs7803454	0.122218	0.122218	4.8e-09	99914532	100638465	723.933	453	mQTL	chr7:99959594:T:C	rs6962405	ENSG00000252660	Y_RNA	cg11013060	Retina	4.66311e-08	0.000557	0.316755	0.0550155	0.016833	0.058086	SAME	0.899089	0.446135	chr7:99959594	FALSE	FALSE
AMD EUR	chr7:100393925:C:T	chr7:100393925:C:T	T	C	rs7803454	0.122218	0.122218	4.8e-09	99914532	100638465	723.933	453	mQTL	chr7:99959594:T:C	rs6962405	ENSG00000252671	Y_RNA	cg11013060	Retina	4.66311e-08	0.000557	0.316755	0.0550155	0.016833	0.058086	SAME	0.899089	0.446135	chr7:99959594	FALSE	FALSE
AMD EUR	chr7:100393925:C:T	chr7:100393925:C:T	T	C	rs7803454	0.122218	0.122218	4.8e-09	99914532	100638465	723.933	453	mQTL	chr7:99959594:T:C	rs6962405	ENSG00000252742	Y_RNA	cg11013060	Retina	4.66311e-08	0.000557	0.316755	0.0550155	0.016833	0.058086	SAME	0.899089	0.446135	chr7:99959594	FALSE	FALSE
AMD EUR	chr7:100393925:C:T	chr7:100393925:C:T	T	C	rs7803454	0.122218	0.122218	4.8e-09	99914532	100638465	723.933	453	mQTL	chr7:99959594:T:C	rs6962405	ENSG00000252744	Y_RNA	cg11013060	Retina	4.66311e-08	0.000557	0.316755	0.0550155	0.016833	0.058086	SAME	0.899089	0.446135	chr7:99959594	FALSE	FALSE
AMD EUR	chr7:100393925:C:T	chr7:100393925:C:T	T	C	rs7803454	0.122218	0.122218	4.8e-09	99914532	100638465	723.933	453	mQTL	chr7:99959594:T:C	rs6962405	ENSG00000252759	Y_RNA	cg11013060	Retina	4.66311e-08	0.000557	0.316755	0.0550155	0.016833	0.058086	SAME	0.899089	0.446135	chr7:99959594	FALSE	FALSE
AMD EUR	chr7:100393925:C:T	chr7:100393925:C:T	T	C	rs7803454	0.122218	0.122218	4.8e-09	99914532	100638465	723.933	453	mQTL	chr7:99959594:T:C	rs6962405	ENSG00000252761	Y_RNA	cg11013060	Retina	4.66311e-08	0.000557	0.316755	0.0550155	0.016833	0.058086	SAME	0.899089	0.446135	chr7:99959594	FALSE	FALSE
AMD EUR	chr7:100393925:C:T	chr7:100393925:C:T	T	C	rs7803454	0.122218	0.122218	4.8e-09	99914532	100638465	723.933	453	mQTL	chr7:99959594:T:C	rs6962405	ENSG00000252784	Y_RNA	cg11013060	Retina	4.66311e-08	0.000557	0.316755	0.0550155	0.016833	0.058086	SAME	0.899089	0.446135	chr7:99959594	FALSE	FALSE
AMD EUR	chr7:100393925:C:T	chr7:100393925:C:T	T	C	rs7803454	0.122218	0.122218	4.8e-09	99914532	100638465	723.933	453	mQTL	chr7:99959594:T:C	rs6962405	ENSG00000252802	Y_RNA	cg11013060	Retina	4.66311e-08	0.000557	0.316755	0.0550155	0.016833	0.058086	SAME	0.899089	0.446135	chr7:99959594	FALSE	FALSE
AMD EUR	chr7:100393925:C:T	chr7:100393925:C:T	T	C	rs7803454	0.122218	0.122218	4.8e-09	99914532	100638465	723.933	453	mQTL	chr7:99959594:T:C	rs6962405	ENSG00000252820	Y_RNA	cg11013060	Retina	4.66311e-08	0.000557	0.316755	0.0550155	0.016833	0.058086	SAME	0.899089	0.446135	chr7:99959594	FALSE	FALSE
AMD EUR	chr7:100393925:C:T	chr7:100393925:C:T	T	C	rs7803454	0.122218	0.122218	4.8e-09	99914532	100638465	723.933	453	mQTL	chr7:99959594:T:C	rs6962405	ENSG00000252822	Y_RNA	cg11013060	Retina	4.66311e-08	0.000557	0.316755	0.0550155	0.016833	0.058086	SAME	0.899089	0.446135	chr7:99959594	FALSE	FALSE
AMD EUR	chr7:100393925:C:T	chr7:100393925:C:T	T	C	rs7803454	0.122218	0.122218	4.8e-09	99914532	100638465	723.933	453	mQTL	chr7:99959594:T:C	rs6962405	ENSG00000252874	Y_RNA	cg11013060	Retina	4.66311e-08	0.000557	0.316755	0.0550155	0.016833	0.058086	SAME	0.899089	0.446135	chr7:99959594	FALSE	FALSE
AMD EUR	chr7:100393925:C:T	chr7:100393925:C:T	T	C	rs7803454	0.122218	0.122218	4.8e-09	99914532	100638465	723.933	453	mQTL	chr7:99959594:T:C	rs6962405	ENSG00000252891	Y_RNA	cg11013060	Retina	4.66311e-08	0.000557	0.316755	0.0550155	0.016833	0.058086	SAME	0.899089	0.446135	chr7:99959594	FALSE	FALSE
AMD EUR	chr7:100393925:C:T	chr7:100393925:C:T	T	C	rs7803454	0.122218	0.122218	4.8e-09	99914532	100638465	723.933	453	mQTL	chr7:99959594:T:C	rs6962405	ENSG00000252894	Y_RNA	cg11013060	Retina	4.66311e-08	0.000557	0.316755	0.0550155	0.016833	0.058086	SAME	0.899089	0.446135	chr7:99959594	FALSE	FALSE
AMD EUR	chr7:100393925:C:T	chr7:100393925:C:T	T	C	rs7803454	0.122218	0.122218	4.8e-09	99914532	100638465	723.933	453	mQTL	chr7:99959594:T:C	rs6962405	ENSG00000252915	Y_RNA	cg11013060	Retina	4.66311e-08	0.000557	0.316755	0.0550155	0.016833	0.058086	SAME	0.899089	0.446135	chr7:99959594	FALSE	FALSE
AMD EUR	chr7:100393925:C:T	chr7:100393925:C:T	T	C	rs7803454	0.122218	0.122218	4.8e-09	99914532	100638465	723.933	453	mQTL	chr7:99959594:T:C	rs6962405	ENSG00000252919	Y_RNA	cg11013060	Retina	4.66311e-08	0.000557	0.316755	0.0550155	0.016833	0.058086	SAME	0.899089	0.446135	chr7:99959594	FALSE	FALSE
AMD EUR	chr7:100393925:C:T	chr7:100393925:C:T	T	C	rs7803454	0.122218	0.122218	4.8e-09	99914532	100638465	723.933	453	mQTL	chr7:99959594:T:C	rs6962405	ENSG00000252965	Y_RNA	cg11013060	Retina	4.66311e-08	0.000557	0.316755	0.0550155	0.016833	0.058086	SAME	0.899089	0.446135	chr7:99959594	FALSE	FALSE
AMD EUR	chr7:100393925:C:T	chr7:100393925:C:T	T	C	rs7803454	0.122218	0.122218	4.8e-09	99914532	100638465	723.933	453	mQTL	chr7:99959594:T:C	rs6962405	ENSG00000252975	Y_RNA	cg11013060	Retina	4.66311e-08	0.000557	0.316755	0.0550155	0.016833	0.058086	SAME	0.899089	0.446135	chr7:99959594	FALSE	FALSE
AMD EUR	chr7:100393925:C:T	chr7:100393925:C:T	T	C	rs7803454	0.122218	0.122218	4.8e-09	99914532	100638465	723.933	453	mQTL	chr7:99959594:T:C	rs6962405	ENSG00000253016	Y_RNA	cg11013060	Retina	4.66311e-08	0.000557	0.316755	0.0550155	0.016833	0.058086	SAME	0.899089	0.446135	chr7:99959594	FALSE	FALSE
AMD EUR	chr7:100393925:C:T	chr7:100393925:C:T	T	C	rs7803454	0.122218	0.122218	4.8e-09	99914532	100638465	723.933	453	mQTL	chr7:99959594:T:C	rs6962405	ENSG00000253088	Y_RNA	cg11013060	Retina	4.66311e-08	0.000557	0.316755	0.0550155	0.016833	0.058086	SAME	0.899089	0.446135	chr7:99959594	FALSE	FALSE
AMD EUR	chr7:100393925:C:T	chr7:100393925:C:T	T	C	rs7803454	0.122218	0.122218	4.8e-09	99914532	100638465	723.933	453	mQTL	chr7:99959594:T:C	rs6962405	ENSG00000253096	Y_RNA	cg11013060	Retina	4.66311e-08	0.000557	0.316755	0.0550155	0.016833	0.058086	SAME	0.899089	0.446135	chr7:99959594	FALSE	FALSE
AMD EUR	chr7:100393925:C:T	chr7:100393925:C:T	T	C	rs7803454	0.122218	0.122218	4.8e-09	99914532	100638465	723.933	453	mQTL	chr7:99959594:T:C	rs6962405	ENSG00000265889	Y_RNA	cg11013060	Retina	4.66311e-08	0.000557	0.316755	0.0550155	0.016833	0.058086	SAME	0.899089	0.446135	chr7:99959594	FALSE	FALSE
AMD EUR	chr7:100393925:C:T	chr7:100393925:C:T	T	C	rs7803454	0.122218	0.122218	4.8e-09	99914532	100638465	723.933	453	mQTL	chr7:99959594:T:C	rs6962405	ENSG00000265961	Y_RNA	cg11013060	Retina	4.66311e-08	0.000557	0.316755	0.0550155	0.016833	0.058086	SAME	0.899089	0.446135	chr7:99959594	FALSE	FALSE
AMD EUR	chr7:100393925:C:T	chr7:100393925:C:T	T	C	rs7803454	0.122218	0.122218	4.8e-09	99914532	100638465	723.933	453	mQTL	chr7:99959594:T:C	rs6962405	ENSG00000267828	Y_RNA	cg11013060	Retina	4.66311e-08	0.000557	0.316755	0.0550155	0.016833	0.058086	SAME	0.899089	0.446135	chr7:99959594	FALSE	FALSE
AMD EUR	chr7:100393925:C:T	chr7:100393925:C:T	T	C	rs7803454	0.122218	0.122218	4.8e-09	99914532	100638465	723.933	453	mQTL	chr7:99959594:T:C	rs6962405	ENSG00000272051	Y_RNA	cg11013060	Retina	4.66311e-08	0.000557	0.316755	0.0550155	0.016833	0.058086	SAME	0.899089	0.446135	chr7:99959594	FALSE	FALSE
AMD EUR	chr7:100393925:C:T	chr7:100393925:C:T	T	C	rs7803454	0.122218	0.122218	4.8e-09	99914532	100638465	723.933	453	mQTL	chr7:99959594:T:C	rs6962405	ENSG00000272113	Y_RNA	cg11013060	Retina	4.66311e-08	0.000557	0.316755	0.0550155	0.016833	0.058086	SAME	0.899089	0.446135	chr7:99959594	FALSE	FALSE
AMD EUR	chr7:100393925:C:T	chr7:100393925:C:T	T	C	rs7803454	0.122218	0.122218	4.8e-09	99914532	100638465	723.933	453	mQTL	chr7:99959594:T:C	rs6962405	ENSG00000273927	Y_RNA	cg11013060	Retina	4.66311e-08	0.000557	0.316755	0.0550155	0.016833	0.058086	SAME	0.899089	0.446135	chr7:99959594	FALSE	FALSE
AMD EUR	chr7:100393925:C:T	chr7:100393925:C:T	T	C	rs7803454	0.122218	0.122218	4.8e-09	99914532	100638465	723.933	453	mQTL	chr7:99959594:T:C	rs6962405	ENSG00000273964	Y_RNA	cg11013060	Retina	4.66311e-08	0.000557	0.316755	0.0550155	0.016833	0.058086	SAME	0.899089	0.446135	chr7:99959594	FALSE	FALSE
AMD EUR	chr7:100393925:C:T	chr7:100393925:C:T	T	C	rs7803454	0.122218	0.122218	4.8e-09	99914532	100638465	723.933	453	mQTL	chr7:99959594:T:C	rs6962405	ENSG00000274046	Y_RNA	cg11013060	Retina	4.66311e-08	0.000557	0.316755	0.0550155	0.016833	0.058086	SAME	0.899089	0.446135	chr7:99959594	FALSE	FALSE
AMD EUR	chr7:100393925:C:T	chr7:100393925:C:T	T	C	rs7803454	0.122218	0.122218	4.8e-09	99914532	100638465	723.933	453	mQTL	chr7:99959594:T:C	rs6962405	ENSG00000274118	Y_RNA	cg11013060	Retina	4.66311e-08	0.000557	0.316755	0.0550155	0.016833	0.058086	SAME	0.899089	0.446135	chr7:99959594	FALSE	FALSE
AMD EUR	chr7:100393925:C:T	chr7:100393925:C:T	T	C	rs7803454	0.122218	0.122218	4.8e-09	99914532	100638465	723.933	453	mQTL	chr7:99959594:T:C	rs6962405	ENSG00000274284	Y_RNA	cg11013060	Retina	4.66311e-08	0.000557	0.316755	0.0550155	0.016833	0.058086	SAME	0.899089	0.446135	chr7:99959594	FALSE	FALSE
AMD EUR	chr7:100393925:C:T	chr7:100393925:C:T	T	C	rs7803454	0.122218	0.122218	4.8e-09	99914532	100638465	723.933	453	mQTL	chr7:99959594:T:C	rs6962405	ENSG00000274472	Y_RNA	cg11013060	Retina	4.66311e-08	0.000557	0.316755	0.0550155	0.016833	0.058086	SAME	0.899089	0.446135	chr7:99959594	FALSE	FALSE
AMD EUR	chr7:100393925:C:T	chr7:100393925:C:T	T	C	rs7803454	0.122218	0.122218	4.8e-09	99914532	100638465	723.933	453	mQTL	chr7:99959594:T:C	rs6962405	ENSG00000274484	Y_RNA	cg11013060	Retina	4.66311e-08	0.000557	0.316755	0.0550155	0.016833	0.058086	SAME	0.899089	0.446135	chr7:99959594	FALSE	FALSE
AMD EUR	chr7:100393925:C:T	chr7:100393925:C:T	T	C	rs7803454	0.122218	0.122218	4.8e-09	99914532	100638465	723.933	453	mQTL	chr7:99959594:T:C	rs6962405	ENSG00000274603	Y_RNA	cg11013060	Retina	4.66311e-08	0.000557	0.316755	0.0550155	0.016833	0.058086	SAME	0.899089	0.446135	chr7:99959594	FALSE	FALSE
AMD EUR	chr7:100393925:C:T	chr7:100393925:C:T	T	C	rs7803454	0.122218	0.122218	4.8e-09	99914532	100638465	723.933	453	mQTL	chr7:99959594:T:C	rs6962405	ENSG00000274790	Y_RNA	cg11013060	Retina	4.66311e-08	0.000557	0.316755	0.0550155	0.016833	0.058086	SAME	0.899089	0.446135	chr7:99959594	FALSE	FALSE
AMD EUR	chr7:100393925:C:T	chr7:100393925:C:T	T	C	rs7803454	0.122218	0.122218	4.8e-09	99914532	100638465	723.933	453	mQTL	chr7:99959594:T:C	rs6962405	ENSG00000274967	Y_RNA	cg11013060	Retina	4.66311e-08	0.000557	0.316755	0.0550155	0.016833	0.058086	SAME	0.899089	0.446135	chr7:99959594	FALSE	FALSE
AMD EUR	chr7:100393925:C:T	chr7:100393925:C:T	T	C	rs7803454	0.122218	0.122218	4.8e-09	99914532	100638465	723.933	453	mQTL	chr7:99959594:T:C	rs6962405	ENSG00000274984	Y_RNA	cg11013060	Retina	4.66311e-08	0.000557	0.316755	0.0550155	0.016833	0.058086	SAME	0.899089	0.446135	chr7:99959594	FALSE	FALSE
AMD EUR	chr7:100393925:C:T	chr7:100393925:C:T	T	C	rs7803454	0.122218	0.122218	4.8e-09	99914532	100638465	723.933	453	mQTL	chr7:99959594:T:C	rs6962405	ENSG00000275006	Y_RNA	cg11013060	Retina	4.66311e-08	0.000557	0.316755	0.0550155	0.016833	0.058086	SAME	0.899089	0.446135	chr7:99959594	FALSE	FALSE
AMD EUR	chr7:100393925:C:T	chr7:100393925:C:T	T	C	rs7803454	0.122218	0.122218	4.8e-09	99914532	100638465	723.933	453	mQTL	chr7:99959594:T:C	rs6962405	ENSG00000275745	Y_RNA	cg11013060	Retina	4.66311e-08	0.000557	0.316755	0.0550155	0.016833	0.058086	SAME	0.899089	0.446135	chr7:99959594	FALSE	FALSE
AMD EUR	chr7:100393925:C:T	chr7:100393925:C:T	T	C	rs7803454	0.122218	0.122218	4.8e-09	99914532	100638465	723.933	453	mQTL	chr7:99959594:T:C	rs6962405	ENSG00000275904	Y_RNA	cg11013060	Retina	4.66311e-08	0.000557	0.316755	0.0550155	0.016833	0.058086	SAME	0.899089	0.446135	chr7:99959594	FALSE	FALSE
AMD EUR	chr7:100393925:C:T	chr7:100393925:C:T	T	C	rs7803454	0.122218	0.122218	4.8e-09	99914532	100638465	723.933	453	mQTL	chr7:99959594:T:C	rs6962405	ENSG00000275930	Y_RNA	cg11013060	Retina	4.66311e-08	0.000557	0.316755	0.0550155	0.016833	0.058086	SAME	0.899089	0.446135	chr7:99959594	FALSE	FALSE
AMD EUR	chr7:100393925:C:T	chr7:100393925:C:T	T	C	rs7803454	0.122218	0.122218	4.8e-09	99914532	100638465	723.933	453	mQTL	chr7:99959594:T:C	rs6962405	ENSG00000275982	Y_RNA	cg11013060	Retina	4.66311e-08	0.000557	0.316755	0.0550155	0.016833	0.058086	SAME	0.899089	0.446135	chr7:99959594	FALSE	FALSE
AMD EUR	chr7:100393925:C:T	chr7:100393925:C:T	T	C	rs7803454	0.122218	0.122218	4.8e-09	99914532	100638465	723.933	453	mQTL	chr7:99959594:T:C	rs6962405	ENSG00000276178	Y_RNA	cg11013060	Retina	4.66311e-08	0.000557	0.316755	0.0550155	0.016833	0.058086	SAME	0.899089	0.446135	chr7:99959594	FALSE	FALSE
AMD EUR	chr7:100393925:C:T	chr7:100393925:C:T	T	C	rs7803454	0.122218	0.122218	4.8e-09	99914532	100638465	723.933	453	mQTL	chr7:99959594:T:C	rs6962405	ENSG00000276546	Y_RNA	cg11013060	Retina	4.66311e-08	0.000557	0.316755	0.0550155	0.016833	0.058086	SAME	0.899089	0.446135	chr7:99959594	FALSE	FALSE
AMD EUR	chr7:100393925:C:T	chr7:100393925:C:T	T	C	rs7803454	0.122218	0.122218	4.8e-09	99914532	100638465	723.933	453	mQTL	chr7:99959594:T:C	rs6962405	ENSG00000276696	Y_RNA	cg11013060	Retina	4.66311e-08	0.000557	0.316755	0.0550155	0.016833	0.058086	SAME	0.899089	0.446135	chr7:99959594	FALSE	FALSE
AMD EUR	chr7:100393925:C:T	chr7:100393925:C:T	T	C	rs7803454	0.122218	0.122218	4.8e-09	99914532	100638465	723.933	453	mQTL	chr7:99959594:T:C	rs6962405	ENSG00000276723	Y_RNA	cg11013060	Retina	4.66311e-08	0.000557	0.316755	0.0550155	0.016833	0.058086	SAME	0.899089	0.446135	chr7:99959594	FALSE	FALSE
AMD EUR	chr7:100393925:C:T	chr7:100393925:C:T	T	C	rs7803454	0.122218	0.122218	4.8e-09	99914532	100638465	723.933	453	mQTL	chr7:99959594:T:C	rs6962405	ENSG00000276902	Y_RNA	cg11013060	Retina	4.66311e-08	0.000557	0.316755	0.0550155	0.016833	0.058086	SAME	0.899089	0.446135	chr7:99959594	FALSE	FALSE
AMD EUR	chr7:100393925:C:T	chr7:100393925:C:T	T	C	rs7803454	0.122218	0.122218	4.8e-09	99914532	100638465	723.933	453	mQTL	chr7:99959594:T:C	rs6962405	ENSG00000277604	Y_RNA	cg11013060	Retina	4.66311e-08	0.000557	0.316755	0.0550155	0.016833	0.058086	SAME	0.899089	0.446135	chr7:99959594	FALSE	FALSE
AMD EUR	chr7:100393925:C:T	chr7:100393925:C:T	T	C	rs7803454	0.122218	0.122218	4.8e-09	99914532	100638465	723.933	453	mQTL	chr7:99959594:T:C	rs6962405	ENSG00000277634	Y_RNA	cg11013060	Retina	4.66311e-08	0.000557	0.316755	0.0550155	0.016833	0.058086	SAME	0.899089	0.446135	chr7:99959594	FALSE	FALSE
AMD EUR	chr7:100393925:C:T	chr7:100393925:C:T	T	C	rs7803454	0.122218	0.122218	4.8e-09	99914532	100638465	723.933	453	mQTL	chr7:99959594:T:C	rs6962405	ENSG00000277777	Y_RNA	cg11013060	Retina	4.66311e-08	0.000557	0.316755	0.0550155	0.016833	0.058086	SAME	0.899089	0.446135	chr7:99959594	FALSE	FALSE
AMD EUR	chr7:100393925:C:T	chr7:100393925:C:T	T	C	rs7803454	0.122218	0.122218	4.8e-09	99914532	100638465	723.933	453	mQTL	chr7:99959594:T:C	rs6962405	ENSG00000277818	Y_RNA	cg11013060	Retina	4.66311e-08	0.000557	0.316755	0.0550155	0.016833	0.058086	SAME	0.899089	0.446135	chr7:99959594	FALSE	FALSE
AMD EUR	chr7:100393925:C:T	chr7:100393925:C:T	T	C	rs7803454	0.122218	0.122218	4.8e-09	99914532	100638465	723.933	453	mQTL	chr7:99959594:T:C	rs6962405	ENSG00000278028	Y_RNA	cg11013060	Retina	4.66311e-08	0.000557	0.316755	0.0550155	0.016833	0.058086	SAME	0.899089	0.446135	chr7:99959594	FALSE	FALSE
AMD EUR	chr7:100393925:C:T	chr7:100393925:C:T	T	C	rs7803454	0.122218	0.122218	4.8e-09	99914532	100638465	723.933	453	mQTL	chr7:99959594:T:C	rs6962405	ENSG00000278523	Y_RNA	cg11013060	Retina	4.66311e-08	0.000557	0.316755	0.0550155	0.016833	0.058086	SAME	0.899089	0.446135	chr7:99959594	FALSE	FALSE
AMD EUR	chr7:100393925:C:T	chr7:100393925:C:T	T	C	rs7803454	0.122218	0.122218	4.8e-09	99914532	100638465	723.933	453	mQTL	chr7:99959594:T:C	rs6962405	ENSG00000283592	Y_RNA	cg11013060	Retina	4.66311e-08	0.000557	0.316755	0.0550155	0.016833	0.058086	SAME	0.899089	0.446135	chr7:99959594	FALSE	FALSE
AMD EUR	chr7:100393925:C:T	chr7:100393925:C:T	T	C	rs7803454	0.122218	0.122218	4.8e-09	99914532	100638465	723.933	453	mQTL	chr7:99959594:T:C	rs6962405	ENSG00000283691	Y_RNA	cg11013060	Retina	4.66311e-08	0.000557	0.316755	0.0550155	0.016833	0.058086	SAME	0.899089	0.446135	chr7:99959594	FALSE	FALSE
AMD EUR	chr10:24710664:G:A	chr10:24710664:G:A	A	G	rs12357257	0.10436	0.10436	4.4e-08	24487469	24938127	450.658	323	mQTL	chr10:24740234:T:C	rs6482428	ENSG00000107863	ARHGAP21	cg22753919	Retina	0.000122272	1.25e-06	-0.107969	0.0273699	0.018562	-0.089959	SAME	0.359384	0.431723	chr10:24740234	FALSE	FALSE
AMD EUR	chr10:24710664:G:A	chr10:24710664:G:A	A	G	rs12357257	0.10436	0.10436	4.4e-08	24487469	24938127	450.658	323	mQTL	chr10:24740234:T:C	rs6482428	ENSG00000199535	RNA5SP305	cg22753919	Retina	0.000122272	1.25e-06	-0.107969	0.0273699	0.018562	-0.089959	SAME	0.359384	0.431723	chr10:24740234	FALSE	FALSE
AMD EUR	chr19:1031439:C:T	chr19:1031439:C:T	T	C	rs67538026	-0.105361	0.105361	2.6e-08	948322	1142512	194.19	929	eQTL	chr19:1031659:A:G	rs73503267	ENSG00000182087	TMEM259	NA	Retina	0.00129961	4.51e-05	-1.9024	0.587351	0.0185	-0.075451	SAME	0.520054	0.32128	chr19:1031659	FALSE	FALSE
AMD EUR	chr14:68302482:T:C	chr14:68302482:C:T	C	T	rs61985136	-0.105361	0.105361	1.6e-10	67660862	68556533	895.671	398	mQTL	chr14:68520282:G:A	rs2842339	ENSG00000029364	SLC39A9	cg23346107	Retina	0.00721001	1.36e-06	-0.165289	0.0606727	0.027282	-0.13176	SAME	0.50596	0.299437	chr14:68520282	FALSE	FALSE
AMD EUR	chr14:68302482:T:C	chr14:68302482:C:T	C	T	rs61985136	-0.105361	0.105361	1.6e-10	67660862	68556533	895.671	398	mQTL	chr14:68520282:G:A	rs2842339	ENSG00000100632	ERH	cg23346107	Retina	0.00721001	1.36e-06	-0.165289	0.0606727	0.027282	-0.13176	SAME	0.50596	0.299437	chr14:68520282	FALSE	FALSE
AMD EUR	chr5:35494346:G:A	chr5:35494346:G:A	A	G	rs114092250	-0.356675	0.356675	2.1e-08	34785344	36350995	1565.65	437	eQTL	chr5:35726347:T:G	rs34181885	ENSG00000152582	SPEF2	NA	Retina	7.34801e-07	0.0156	1.90942	0.379468	0.020105	0.048623	SAME	0.527092	0.229191	chr5:35726347	FALSE	FALSE
AMD EUR	chr7:100393925:C:T	chr7:100393925:C:T	T	C	rs7803454	0.122218	0.122218	4.8e-09	99914532	100638465	723.933	453	mQTL	chr7:99959594:T:C	rs6962405	ENSG00000106333	PCOLCE	cg17846263	Retina	0.00425988	0.000557	-0.043787	0.0150857	0.016833	0.058086	OPPOSITE	0.588903	0.191289	chr7:99959594	FALSE	FALSE
AMD EUR	chr7:100393925:C:T	chr7:100393925:C:T	T	C	rs7803454	0.122218	0.122218	4.8e-09	99914532	100638465	723.933	453	mQTL	chr7:99959594:T:C	rs6962405	ENSG00000224729	PCOLCE-AS1	cg17846263	Retina	0.00425988	0.000557	-0.043787	0.0150857	0.016833	0.058086	OPPOSITE	0.588903	0.191289	chr7:99959594	FALSE	FALSE
AMD EUR	chr5:35494346:G:A	chr5:35494346:G:A	A	G	rs114092250	-0.356675	0.356675	2.1e-08	34785344	36350995	1565.65	428	eQTL	chr5:35725407:A:G	rs11954310	ENSG00000145604	SKP2	NA	Retina	0.056758	0.0147	-0.225992	0.118278	0.020109	0.049083	OPPOSITE	0.515197	0.18528	chr5:35725407	FALSE	FALSE
AMD EUR	chr5:35494346:G:A	chr5:35494346:G:A	A	G	rs114092250	-0.356675	0.356675	2.1e-08	34785344	36350995	1565.65	437	eQTL	chr5:35725407:A:G	rs11954310	ENSG00000152582	SPEF2	NA	Retina	8.28136e-07	0.0147	1.9008	0.379598	0.020109	0.049083	SAME	0.420968	0.183046	chr5:35725407	FALSE	FALSE
AMD EUR	chr14:68302482:T:C	chr14:68302482:C:T	C	T	rs61985136	-0.105361	0.105361	1.6e-10	67660862	68556533	895.671	398	mQTL	chr14:68517625:A:G	rs57947677	ENSG00000029364	SLC39A9	cg23346107	Retina	0.0072429	2.16e-06	0.165391	0.0607453	0.027294	0.12928	SAME	0.305136	0.180586	chr14:68517625	FALSE	FALSE
AMD EUR	chr14:68302482:T:C	chr14:68302482:C:T	C	T	rs61985136	-0.105361	0.105361	1.6e-10	67660862	68556533	895.671	398	mQTL	chr14:68517625:A:G	rs57947677	ENSG00000100632	ERH	cg23346107	Retina	0.0072429	2.16e-06	0.165391	0.0607453	0.027294	0.12928	SAME	0.305136	0.180586	chr14:68517625	FALSE	FALSE
AMD EUR	chr5:35494346:G:A	chr5:35494346:G:A	A	G	rs114092250	-0.356675	0.356675	2.1e-08	34785344	36350995	1565.65	428	eQTL	chr5:35726347:T:G	rs34181885	ENSG00000145604	SKP2	NA	Retina	0.0558671	0.0156	-0.226795	0.118268	0.020105	0.048623	OPPOSITE	0.450181	0.161898	chr5:35726347	FALSE	FALSE
AMD EUR	chr5:39327786:G:T	chr5:39327786:G:T	T	G	rs62358361	0.587787	0.587787	1.3e-14	38362854	40352636	1989.78	165	mQTL	chr5:39400254:T:C	rs10043562	ENSG00000145623	OSMR	cg05955210	Retina	0.124217	0.0041	0.0550686	0.0356205	0.019392	0.055628	SAME	0.911042	0.122813	chr5:39400254	FALSE	FALSE
AMD EUR	chr5:39327786:G:T	chr5:39327786:G:T	T	G	rs62358361	0.587787	0.587787	1.3e-14	38362854	40352636	1989.78	165	mQTL	chr5:39400254:T:C	rs10043562	ENSG00000249740	OSMR-AS1	cg05955210	Retina	0.124217	0.0041	0.0550686	0.0356205	0.019392	0.055628	SAME	0.911042	0.122813	chr5:39400254	FALSE	FALSE
AMD EUR	chr20:45986352:TTTTC:T	chr20:45986338:A:T	T	TTTTC	rs142450006	-0.162519	0.162519	2.4e-10	45736352	46236352	500	194	mQTL	chr20:46005037:C:T	rs3848721	ENSG00000100982	PCIF1	cg14527983	Retina	0.0263605	8.9e-07	-0.0734724	0.0327559	0.017199	-0.084459	SAME	0.429594	0.117751	chr20:46005037	FALSE	FALSE
AMD EUR	chr5:35494346:G:A	chr5:35494346:G:A	A	G	rs114092250	-0.356675	0.356675	2.1e-08	34785344	36350995	1565.65	418	mQTL	chr5:35725407:A:G	rs11954310	ENSG00000152620	NADK2	cg03966322	Retina	0.0613093	0.0147	-0.521798	0.276757	0.020109	0.049083	OPPOSITE	0.496526	0.105534	chr5:35725407	FALSE	FALSE
AMD EUR	chr5:35494346:G:A	chr5:35494346:G:A	A	G	rs114092250	-0.356675	0.356675	2.1e-08	34785344	36350995	1565.65	418	mQTL	chr5:35725407:A:G	rs11954310	ENSG00000152620	NADK2	cg12648931	Retina	0.0822982	0.0147	-0.357238	0.204227	0.020109	0.049083	OPPOSITE	0.502526	0.097871	chr5:35725407	FALSE	FALSE
AMD EUR	chr17:28322698:C:A	chr17:28322698:A:C	A	C	rs11080055	-0.0943107	0.0943107	1e-08	27998441	28520397	521.956	565	eQTL	chr17:28379927:G:T	rs2027993	ENSG00000004139	SARM1	NA	Retina	0.00230115	3.31e-08	2.04442	0.666366	0.016569	0.091471	SAME	0.627072	0.0973206	chr17:28379927	FALSE	FALSE
AMD EUR	chr5:35494346:G:A	chr5:35494346:G:A	A	G	rs114092250	-0.356675	0.356675	2.1e-08	34785344	36350995	1565.65	418	mQTL	chr5:35726347:T:G	rs34181885	ENSG00000152620	NADK2	cg03966322	Retina	0.0611864	0.0156	-0.52211	0.276789	0.020105	0.048623	OPPOSITE	0.415783	0.0883727	chr5:35726347	FALSE	FALSE
AMD EUR	chr5:35494346:G:A	chr5:35494346:G:A	A	G	rs114092250	-0.356675	0.356675	2.1e-08	34785344	36350995	1565.65	418	mQTL	chr5:35726347:T:G	rs34181885	ENSG00000152620	NADK2	cg12648931	Retina	0.0821958	0.0156	-0.357402	0.204252	0.020105	0.048623	OPPOSITE	0.419842	0.0817676	chr5:35726347	FALSE	FALSE
AMD EUR	chr20:45986352:TTTTC:T	chr20:45986338:A:T	T	TTTTC	rs142450006	-0.162519	0.162519	2.4e-10	45736352	46236352	500	194	mQTL	chr20:46005181:A:G	rs3848722	ENSG00000100982	PCIF1	cg14527983	Retina	0.0263587	1.04e-06	-0.0734687	0.0327538	0.017195	-0.083923	SAME	0.251599	0.0689627	chr20:46005181	FALSE	FALSE
AMD EUR	chr12:111694806:G:A	chr12:111694806:G:A	A	G	rs61941274	0.41211	0.41211	1.1e-09	110675816	112735153	2059.34	696	mQTL	chr12:111582410:G:C	rs10774629	ENSG00000257595	RP3-473L9.4	cg14760880	Retina	4.35577e-14	5.53e-05	-0.198882	0.0238367	0.0207	0.083388	OPPOSITE	0.27963	0.0638439	chr12:111582410	FALSE	FALSE
AMD EUR	chr12:111694806:G:A	chr12:111694806:G:A	A	G	rs61941274	0.41211	0.41211	1.1e-09	110675816	112735153	2059.34	696	mQTL	chr12:111588579:A:G	rs7398196	ENSG00000257595	RP3-473L9.4	cg14760880	Retina	4.46994e-14	5.33e-05	-0.19911	0.023877	0.020749	0.083762	OPPOSITE	0.277414	0.0633378	chr12:111588579	FALSE	FALSE
AMD EUR	chr12:111694806:G:A	chr12:111694806:G:A	A	G	rs61941274	0.41211	0.41211	1.1e-09	110675816	112735153	2059.34	696	mQTL	chr12:111582410:G:C	rs10774629	ENSG00000257595	RP3-473L9.4	cg20594304	Retina	3.4805e-15	5.53e-05	-0.404119	0.0460417	0.0207	0.083388	OPPOSITE	0.277375	0.0629915	chr12:111582410	FALSE	FALSE
AMD EUR	chr12:111694806:G:A	chr12:111694806:G:A	A	G	rs61941274	0.41211	0.41211	1.1e-09	110675816	112735153	2059.34	793	eQTL	chr12:111585263:G:A	rs11065961	ENSG00000111275	ALDH2	NA	Retina	2.50366e-16	3.24e-05	5.8959	0.689077	0.019656	0.081621	SAME	0.740462	0.0627852	chr12:111585263	FALSE	FALSE
AMD EUR	chr12:111694806:G:A	chr12:111694806:G:A	A	G	rs61941274	0.41211	0.41211	1.1e-09	110675816	112735153	2059.34	696	mQTL	chr12:111585197:A:G	rs10774631	ENSG00000257595	RP3-473L9.4	cg14760880	Retina	4.40041e-14	5.5e-05	-0.198991	0.0238549	0.020721	0.083499	OPPOSITE	0.274002	0.062559	chr12:111585197	FALSE	FALSE
AMD EUR	chr12:111694806:G:A	chr12:111694806:G:A	A	G	rs61941274	0.41211	0.41211	1.1e-09	110675816	112735153	2059.34	696	mQTL	chr12:111585197:A:G	rs10774631	ENSG00000257595	RP3-473L9.4	cg20594304	Retina	3.51744e-15	5.5e-05	-0.404346	0.0460769	0.020721	0.083499	OPPOSITE	0.271444	0.0616446	chr12:111585197	FALSE	FALSE
AMD EUR	chr12:111694806:G:A	chr12:111694806:G:A	A	G	rs61941274	0.41211	0.41211	1.1e-09	110675816	112735153	2059.34	696	mQTL	chr12:111588579:A:G	rs7398196	ENSG00000257595	RP3-473L9.4	cg20594304	Retina	3.58723e-15	5.33e-05	-0.404576	0.0461208	0.020749	0.083762	OPPOSITE	0.271065	0.0615584	chr12:111588579	FALSE	FALSE
AMD EUR	chr12:111694806:G:A	chr12:111694806:G:A	A	G	rs61941274	0.41211	0.41211	1.1e-09	110675816	112735153	2059.34	792	eQTL	chr12:111585263:G:A	rs11065961	ENSG00000198270	TMEM116	NA	Retina	2.60461e-07	3.24e-05	-0.807443	0.154101	0.019656	0.081621	OPPOSITE	0.741907	0.0605865	chr12:111585263	FALSE	FALSE
AMD EUR	chr12:111694806:G:A	chr12:111694806:G:A	A	G	rs61941274	0.41211	0.41211	1.1e-09	110675816	112735153	2059.34	711	eQTL	chr12:111588579:A:G	rs7398196	ENSG00000111252	SH2B3	NA	Retina	3.72301e-50	5.33e-05	3.0679	0.178136	0.020749	0.083762	SAME	0.260536	0.0604389	chr12:111588579	FALSE	FALSE
AMD EUR	chr12:111694806:G:A	chr12:111694806:G:A	A	G	rs61941274	0.41211	0.41211	1.1e-09	110675816	112735153	2059.34	793	eQTL	chr12:111588579:A:G	rs7398196	ENSG00000229186	ADAM1A	NA	Retina	1.86274e-13	5.33e-05	1.00825	0.132337	0.020749	0.083762	SAME	0.28611	0.0597294	chr12:111588579	FALSE	FALSE
AMD EUR	chr12:111694806:G:A	chr12:111694806:G:A	A	G	rs61941274	0.41211	0.41211	1.1e-09	110675816	112735153	2059.34	793	mQTL	chr12:111585263:G:A	rs11065961	ENSG00000111271	ACAD10	cg13422253	Retina	0.0145577	3.24e-05	-0.076839	0.0310851	0.019656	0.081621	OPPOSITE	0.937193	0.059147	chr12:111585263	FALSE	FALSE
AMD EUR	chr12:111694806:G:A	chr12:111694806:G:A	A	G	rs61941274	0.41211	0.41211	1.1e-09	110675816	112735153	2059.34	793	mQTL	chr12:111585263:G:A	rs11065961	ENSG00000257767	RP11-162P23.2	cg13422253	Retina	0.0145577	3.24e-05	-0.076839	0.0310851	0.019656	0.081621	OPPOSITE	0.937193	0.059147	chr12:111585263	FALSE	FALSE
AMD EUR	chr14:68302482:T:C	chr14:68302482:C:T	C	T	rs61985136	-0.105361	0.105361	1.6e-10	67660862	68556533	895.671	398	mQTL	chr14:68510276:T:G	rs61985771	ENSG00000029364	SLC39A9	cg23346107	Retina	0.00721647	1.92e-06	0.165505	0.0607588	0.027365	0.13026	SAME	0.0948511	0.0561348	chr14:68510276	FALSE	FALSE
AMD EUR	chr14:68302482:T:C	chr14:68302482:C:T	C	T	rs61985136	-0.105361	0.105361	1.6e-10	67660862	68556533	895.671	398	mQTL	chr14:68510276:T:G	rs61985771	ENSG00000100632	ERH	cg23346107	Retina	0.00721647	1.92e-06	0.165505	0.0607588	0.027365	0.13026	SAME	0.0948511	0.0561348	chr14:68510276	FALSE	FALSE
AMD EUR	chr12:111694806:G:A	chr12:111694806:G:A	A	G	rs61941274	0.41211	0.41211	1.1e-09	110675816	112735153	2059.34	711	eQTL	chr12:111578212:A:C	rs7398705	ENSG00000111252	SH2B3	NA	Retina	3.66979e-50	5.3e-05	3.06275	0.177822	0.020592	0.08316	SAME	0.222165	0.0515376	chr12:111578212	FALSE	FALSE
AMD EUR	chr12:111694806:G:A	chr12:111694806:G:A	A	G	rs61941274	0.41211	0.41211	1.1e-09	110675816	112735153	2059.34	793	eQTL	chr12:111585197:A:G	rs10774631	ENSG00000229186	ADAM1A	NA	Retina	1.94718e-13	5.5e-05	1.00693	0.132277	0.020721	0.083499	SAME	0.246636	0.0514886	chr12:111585197	FALSE	FALSE
AMD EUR	chr12:111694806:G:A	chr12:111694806:G:A	A	G	rs61941274	0.41211	0.41211	1.1e-09	110675816	112735153	2059.34	793	eQTL	chr12:111582410:G:C	rs10774629	ENSG00000229186	ADAM1A	NA	Retina	2.01643e-13	5.53e-05	1.00584	0.132224	0.0207	0.083388	SAME	0.226711	0.047329	chr12:111582410	FALSE	FALSE
AMD EUR	chr12:111694806:G:A	chr12:111694806:G:A	A	G	rs61941274	0.41211	0.41211	1.1e-09	110675816	112735153	2059.34	793	mQTL	chr12:111588579:A:G	rs7398196	ENSG00000089022	MAPKAPK5	cg11972180	Retina	1.47292e-13	5.33e-05	-0.184856	0.0227328	0.020749	0.083762	OPPOSITE	0.311312	0.0470142	chr12:111588579	FALSE	FALSE
AMD EUR	chr12:111694806:G:A	chr12:111694806:G:A	A	G	rs61941274	0.41211	0.41211	1.1e-09	110675816	112735153	2059.34	793	mQTL	chr12:111588579:A:G	rs7398196	ENSG00000234608	MAPKAPK5-AS1	cg11972180	Retina	1.47292e-13	5.33e-05	-0.184856	0.0227328	0.020749	0.083762	OPPOSITE	0.311312	0.0470142	chr12:111588579	FALSE	FALSE
AMD EUR	chr12:111694806:G:A	chr12:111694806:G:A	A	G	rs61941274	0.41211	0.41211	1.1e-09	110675816	112735153	2059.34	793	eQTL	chr12:111588579:A:G	rs7398196	ENSG00000089022	MAPKAPK5	NA	Retina	4.86337e-08	5.33e-05	1.9429	0.349275	0.020749	0.083762	SAME	0.280477	0.0465782	chr12:111588579	FALSE	FALSE
AMD EUR	chr12:111694806:G:A	chr12:111694806:G:A	A	G	rs61941274	0.41211	0.41211	1.1e-09	110675816	112735153	2059.34	711	eQTL	chr12:111585197:A:G	rs10774631	ENSG00000111252	SH2B3	NA	Retina	3.98814e-50	5.5e-05	3.06548	0.178067	0.020721	0.083499	SAME	0.192159	0.0445768	chr12:111585197	FALSE	FALSE
AMD EUR	chr22:38080269:C:T	chr22:38080269:C:T	T	C	rs8135665	0.131028	0.131028	5.5e-11	37600688	38268926	668.238	453	mQTL	chr22:38104820:G:A	rs5995536	ENSG00000100097	LGALS1	cg21737444	Retina	0.00130872	2.89e-08	-0.130996	0.039989	0.016457	-0.091249	SAME	0.115214	0.0409372	chr22:38104820	FALSE	FALSE
AMD EUR	chr12:111694806:G:A	chr12:111694806:G:A	A	G	rs61941274	0.41211	0.41211	1.1e-09	110675816	112735153	2059.34	793	eQTL	chr12:111585197:A:G	rs10774631	ENSG00000089022	MAPKAPK5	NA	Retina	5.22264e-08	5.5e-05	1.93746	0.349139	0.020721	0.083499	SAME	0.240313	0.0399083	chr12:111585197	FALSE	FALSE
AMD EUR	chr12:111694806:G:A	chr12:111694806:G:A	A	G	rs61941274	0.41211	0.41211	1.1e-09	110675816	112735153	2059.34	793	mQTL	chr12:111578212:A:C	rs7398705	ENSG00000111275	ALDH2	cg19186356	Retina	6.99236e-07	5.3e-05	0.161372	0.0311438	0.020592	0.08316	SAME	0.279368	0.0369639	chr12:111578212	FALSE	FALSE
AMD EUR	chr12:111694806:G:A	chr12:111694806:G:A	A	G	rs61941274	0.41211	0.41211	1.1e-09	110675816	112735153	2059.34	793	mQTL	chr12:111578212:A:C	rs7398705	ENSG00000257767	RP11-162P23.2	cg19186356	Retina	6.99236e-07	5.3e-05	0.161372	0.0311438	0.020592	0.08316	SAME	0.279368	0.0369639	chr12:111578212	FALSE	FALSE
AMD EUR	chr12:111694806:G:A	chr12:111694806:G:A	A	G	rs61941274	0.41211	0.41211	1.1e-09	110675816	112735153	2059.34	790	eQTL	chr12:111588579:A:G	rs7398196	ENSG00000089234	BRAP	NA	Retina	0.0143828	5.33e-05	-0.350864	0.142728	0.020749	0.083762	OPPOSITE	0.227881	0.0366939	chr12:111588579	FALSE	FALSE
AMD EUR	chr12:111694806:G:A	chr12:111694806:G:A	A	G	rs61941274	0.41211	0.41211	1.1e-09	110675816	112735153	2059.34	793	eQTL	chr12:111582410:G:C	rs10774629	ENSG00000089022	MAPKAPK5	NA	Retina	5.52711e-08	5.53e-05	1.93305	0.349016	0.0207	0.083388	SAME	0.219841	0.0365086	chr12:111582410	FALSE	FALSE
AMD EUR	chr7:100393925:C:T	chr7:100393925:C:T	T	C	rs7803454	0.122218	0.122218	4.8e-09	99914532	100638465	723.933	453	mQTL	chr7:99964635:C:T	rs2404977	ENSG00000106333	PCOLCE	cg17846263	Retina	0.00317006	0.000311	-0.0461167	0.0153763	0.016903	0.060941	OPPOSITE	0.111779	0.0363083	chr7:99964635	FALSE	FALSE
AMD EUR	chr7:100393925:C:T	chr7:100393925:C:T	T	C	rs7803454	0.122218	0.122218	4.8e-09	99914532	100638465	723.933	453	mQTL	chr7:99964635:C:T	rs2404977	ENSG00000224729	PCOLCE-AS1	cg17846263	Retina	0.00317006	0.000311	-0.0461167	0.0153763	0.016903	0.060941	OPPOSITE	0.111779	0.0363083	chr7:99964635	FALSE	FALSE
AMD EUR	chr12:111694806:G:A	chr12:111694806:G:A	A	G	rs61941274	0.41211	0.41211	1.1e-09	110675816	112735153	2059.34	793	mQTL	chr12:111585263:G:A	rs11065961	ENSG00000257767	RP11-162P23.2	cg26649504	Retina	3.93891e-05	3.24e-05	-0.123467	0.0291403	0.019656	0.081621	OPPOSITE	0.315537	0.0362996	chr12:111585263	FALSE	FALSE
AMD EUR	chr22:38080269:C:T	chr22:38080269:C:T	T	C	rs8135665	0.131028	0.131028	5.5e-11	37600688	38268926	668.238	453	eQTL	chr22:38104820:G:A	rs5995536	ENSG00000272720	CTA-228A9.3	NA	Retina	0.000302106	2.89e-08	-0.174805	0.047952	0.016457	-0.091249	SAME	0.0402375	0.0362673	chr22:38104820	FALSE	FALSE
AMD EUR	chr7:100393925:C:T	chr7:100393925:C:T	T	C	rs7803454	0.122218	0.122218	4.8e-09	99914532	100638465	723.933	453	mQTL	chr7:99964705:T:C	rs2404978	ENSG00000106333	PCOLCE	cg17846263	Retina	0.00317097	0.000312	-0.0461161	0.0153766	0.016902	0.060922	OPPOSITE	0.110929	0.0360321	chr7:99964705	FALSE	FALSE
AMD EUR	chr7:100393925:C:T	chr7:100393925:C:T	T	C	rs7803454	0.122218	0.122218	4.8e-09	99914532	100638465	723.933	453	mQTL	chr7:99964705:T:C	rs2404978	ENSG00000224729	PCOLCE-AS1	cg17846263	Retina	0.00317097	0.000312	-0.0461161	0.0153766	0.016902	0.060922	OPPOSITE	0.110929	0.0360321	chr7:99964705	FALSE	FALSE
AMD EUR	chr12:111694806:G:A	chr12:111694806:G:A	A	G	rs61941274	0.41211	0.41211	1.1e-09	110675816	112735153	2059.34	790	eQTL	chr12:111585197:A:G	rs10774631	ENSG00000089234	BRAP	NA	Retina	0.014425	5.5e-05	-0.350517	0.142649	0.020721	0.083499	OPPOSITE	0.21474	0.0345779	chr12:111585197	FALSE	FALSE
AMD EUR	chr12:111694806:G:A	chr12:111694806:G:A	A	G	rs61941274	0.41211	0.41211	1.1e-09	110675816	112735153	2059.34	711	eQTL	chr12:111582410:G:C	rs10774629	ENSG00000111252	SH2B3	NA	Retina	4.27749e-50	5.53e-05	3.06326	0.17801	0.0207	0.083388	SAME	0.148601	0.0344723	chr12:111582410	FALSE	FALSE
AMD EUR	chr12:111694806:G:A	chr12:111694806:G:A	A	G	rs61941274	0.41211	0.41211	1.1e-09	110675816	112735153	2059.34	793	mQTL	chr12:111582410:G:C	rs10774629	ENSG00000111275	ALDH2	cg20884605	Retina	0.000800215	5.53e-05	0.15625	0.0456552	0.0207	0.083388	SAME	0.250047	0.0342355	chr12:111582410	FALSE	FALSE
AMD EUR	chr12:111694806:G:A	chr12:111694806:G:A	A	G	rs61941274	0.41211	0.41211	1.1e-09	110675816	112735153	2059.34	793	mQTL	chr12:111582410:G:C	rs10774629	ENSG00000257767	RP11-162P23.2	cg20884605	Retina	0.000800215	5.53e-05	0.15625	0.0456552	0.0207	0.083388	SAME	0.250047	0.0342355	chr12:111582410	FALSE	FALSE
AMD EUR	chr12:111694806:G:A	chr12:111694806:G:A	A	G	rs61941274	0.41211	0.41211	1.1e-09	110675816	112735153	2059.34	790	eQTL	chr12:111582410:G:C	rs10774629	ENSG00000089234	BRAP	NA	Retina	0.0144856	5.53e-05	-0.350131	0.14258	0.0207	0.083388	OPPOSITE	0.211263	0.034018	chr12:111582410	FALSE	FALSE
AMD EUR	chr12:111694806:G:A	chr12:111694806:G:A	A	G	rs61941274	0.41211	0.41211	1.1e-09	110675816	112735153	2059.34	793	mQTL	chr12:111585197:A:G	rs10774631	ENSG00000089022	MAPKAPK5	cg11972180	Retina	1.6441e-13	5.5e-05	-0.184401	0.0227305	0.020721	0.083499	OPPOSITE	0.221884	0.0335087	chr12:111585197	FALSE	FALSE
AMD EUR	chr12:111694806:G:A	chr12:111694806:G:A	A	G	rs61941274	0.41211	0.41211	1.1e-09	110675816	112735153	2059.34	793	mQTL	chr12:111585197:A:G	rs10774631	ENSG00000234608	MAPKAPK5-AS1	cg11972180	Retina	1.6441e-13	5.5e-05	-0.184401	0.0227305	0.020721	0.083499	OPPOSITE	0.221884	0.0335087	chr12:111585197	FALSE	FALSE
AMD EUR	chr12:111694806:G:A	chr12:111694806:G:A	A	G	rs61941274	0.41211	0.41211	1.1e-09	110675816	112735153	2059.34	793	mQTL	chr12:111588579:A:G	rs7398196	ENSG00000111275	ALDH2	cg20884605	Retina	0.000857466	5.33e-05	0.155626	0.0457441	0.020749	0.083762	SAME	0.242718	0.033232	chr12:111588579	FALSE	FALSE
AMD EUR	chr12:111694806:G:A	chr12:111694806:G:A	A	G	rs61941274	0.41211	0.41211	1.1e-09	110675816	112735153	2059.34	793	mQTL	chr12:111588579:A:G	rs7398196	ENSG00000257767	RP11-162P23.2	cg20884605	Retina	0.000857466	5.33e-05	0.155626	0.0457441	0.020749	0.083762	SAME	0.242718	0.033232	chr12:111588579	FALSE	FALSE
AMD EUR	chr12:111694806:G:A	chr12:111694806:G:A	A	G	rs61941274	0.41211	0.41211	1.1e-09	110675816	112735153	2059.34	793	mQTL	chr12:111585197:A:G	rs10774631	ENSG00000111275	ALDH2	cg20884605	Retina	0.000826013	5.5e-05	0.155964	0.0456959	0.020721	0.083499	SAME	0.241797	0.033106	chr12:111585197	FALSE	FALSE
AMD EUR	chr12:111694806:G:A	chr12:111694806:G:A	A	G	rs61941274	0.41211	0.41211	1.1e-09	110675816	112735153	2059.34	793	mQTL	chr12:111585197:A:G	rs10774631	ENSG00000257767	RP11-162P23.2	cg20884605	Retina	0.000826013	5.5e-05	0.155964	0.0456959	0.020721	0.083499	SAME	0.241797	0.033106	chr12:111585197	FALSE	FALSE
AMD EUR	chr12:111694806:G:A	chr12:111694806:G:A	A	G	rs61941274	0.41211	0.41211	1.1e-09	110675816	112735153	2059.34	699	mQTL	chr12:111582410:G:C	rs10774629	ENSG00000111252	SH2B3	cg02298094	Retina	1.58004e-17	5.53e-05	-0.395698	0.0408618	0.0207	0.083388	OPPOSITE	0.176636	0.0330242	chr12:111582410	FALSE	FALSE
AMD EUR	chr12:111694806:G:A	chr12:111694806:G:A	A	G	rs61941274	0.41211	0.41211	1.1e-09	110675816	112735153	2059.34	699	mQTL	chr12:111585197:A:G	rs10774631	ENSG00000111252	SH2B3	cg02298094	Retina	1.60318e-17	5.5e-05	-0.395912	0.0408941	0.020721	0.083499	OPPOSITE	0.170131	0.0318081	chr12:111585197	FALSE	FALSE
AMD EUR	chr12:111694806:G:A	chr12:111694806:G:A	A	G	rs61941274	0.41211	0.41211	1.1e-09	110675816	112735153	2059.34	793	mQTL	chr12:111588579:A:G	rs7398196	ENSG00000111271	ACAD10	cg09553684	Retina	0.000337031	5.33e-05	-0.110276	0.0300517	0.020749	0.083762	OPPOSITE	0.229803	0.0315571	chr12:111588579	FALSE	FALSE
AMD EUR	chr12:111694806:G:A	chr12:111694806:G:A	A	G	rs61941274	0.41211	0.41211	1.1e-09	110675816	112735153	2059.34	793	mQTL	chr12:111588579:A:G	rs7398196	ENSG00000257767	RP11-162P23.2	cg09553684	Retina	0.000337031	5.33e-05	-0.110276	0.0300517	0.020749	0.083762	OPPOSITE	0.229803	0.0315571	chr12:111588579	FALSE	FALSE
AMD EUR	chr12:111694806:G:A	chr12:111694806:G:A	A	G	rs61941274	0.41211	0.41211	1.1e-09	110675816	112735153	2059.34	699	mQTL	chr12:111588579:A:G	rs7398196	ENSG00000111252	SH2B3	cg02298094	Retina	1.64255e-17	5.33e-05	-0.396136	0.0409343	0.020749	0.083762	OPPOSITE	0.16662	0.0311517	chr12:111588579	FALSE	FALSE
AMD EUR	chr22:38080269:C:T	chr22:38080269:C:T	T	C	rs8135665	0.131028	0.131028	5.5e-11	37600688	38268926	668.238	453	eQTL	chr22:38104820:G:A	rs5995536	ENSG00000100139	MICALL1	NA	Retina	0.00711604	2.89e-08	-0.16469	0.0608775	0.016457	-0.091249	SAME	0.0367452	0.0304175	chr22:38104820	FALSE	FALSE
AMD EUR	chr12:111694806:G:A	chr12:111694806:G:A	A	G	rs61941274	0.41211	0.41211	1.1e-09	110675816	112735153	2059.34	699	mQTL	chr12:111578212:A:C	rs7398705	ENSG00000111252	SH2B3	cg02298094	Retina	1.47379e-17	5.3e-05	-0.395217	0.0407635	0.020592	0.08316	OPPOSITE	0.161791	0.0302487	chr12:111578212	FALSE	FALSE
AMD EUR	chr14:68302482:T:C	chr14:68302482:C:T	C	T	rs61985136	-0.105361	0.105361	1.6e-10	67660862	68556533	895.671	398	mQTL	chr14:68510773:A:G	rs2842343	ENSG00000029364	SLC39A9	cg23346107	Retina	0.00683957	1.77e-06	-0.166529	0.0607212	0.027263	-0.13021	SAME	0.0494716	0.0292783	chr14:68510773	FALSE	FALSE
AMD EUR	chr14:68302482:T:C	chr14:68302482:C:T	C	T	rs61985136	-0.105361	0.105361	1.6e-10	67660862	68556533	895.671	398	mQTL	chr14:68510773:A:G	rs2842343	ENSG00000100632	ERH	cg23346107	Retina	0.00683957	1.77e-06	-0.166529	0.0607212	0.027263	-0.13021	SAME	0.0494716	0.0292783	chr14:68510773	FALSE	FALSE
AMD EUR	chr12:111694806:G:A	chr12:111694806:G:A	A	G	rs61941274	0.41211	0.41211	1.1e-09	110675816	112735153	2059.34	793	eQTL	chr12:111578212:A:C	rs7398705	ENSG00000089022	MAPKAPK5	NA	Retina	4.91666e-08	5.3e-05	1.93888	0.34868	0.020592	0.08316	SAME	0.172326	0.0286178	chr12:111578212	FALSE	FALSE
AMD EUR	chr22:38080269:C:T	chr22:38080269:C:T	T	C	rs8135665	0.131028	0.131028	5.5e-11	37600688	38268926	668.238	453	eQTL	chr22:38103579:A:C	rs6001002	ENSG00000272720	CTA-228A9.3	NA	Retina	0.000192085	8.35e-08	-0.178995	0.0475527	0.016411	-0.087907	SAME	0.0314393	0.0283372	chr22:38103579	FALSE	FALSE
AMD EUR	chr12:111694806:G:A	chr12:111694806:G:A	A	G	rs61941274	0.41211	0.41211	1.1e-09	110675816	112735153	2059.34	793	mQTL	chr12:111585197:A:G	rs10774631	ENSG00000111271	ACAD10	cg09553684	Retina	0.000350109	5.5e-05	-0.109893	0.0300342	0.020721	0.083499	OPPOSITE	0.204055	0.0280214	chr12:111585197	FALSE	FALSE
AMD EUR	chr12:111694806:G:A	chr12:111694806:G:A	A	G	rs61941274	0.41211	0.41211	1.1e-09	110675816	112735153	2059.34	793	mQTL	chr12:111585197:A:G	rs10774631	ENSG00000257767	RP11-162P23.2	cg09553684	Retina	0.000350109	5.5e-05	-0.109893	0.0300342	0.020721	0.083499	OPPOSITE	0.204055	0.0280214	chr12:111585197	FALSE	FALSE
AMD EUR	chr12:111694806:G:A	chr12:111694806:G:A	A	G	rs61941274	0.41211	0.41211	1.1e-09	110675816	112735153	2059.34	793	mQTL	chr12:111578212:A:C	rs7398705	ENSG00000111271	ACAD10	cg09553684	Retina	0.000299536	5.3e-05	-0.110794	0.0299256	0.020592	0.08316	OPPOSITE	0.193957	0.0266347	chr12:111578212	FALSE	FALSE
AMD EUR	chr12:111694806:G:A	chr12:111694806:G:A	A	G	rs61941274	0.41211	0.41211	1.1e-09	110675816	112735153	2059.34	793	mQTL	chr12:111578212:A:C	rs7398705	ENSG00000257767	RP11-162P23.2	cg09553684	Retina	0.000299536	5.3e-05	-0.110794	0.0299256	0.020592	0.08316	OPPOSITE	0.193957	0.0266347	chr12:111578212	FALSE	FALSE
AMD EUR	chr12:111694806:G:A	chr12:111694806:G:A	A	G	rs61941274	0.41211	0.41211	1.1e-09	110675816	112735153	2059.34	793	mQTL	chr12:111582410:G:C	rs10774629	ENSG00000111271	ACAD10	cg09553684	Retina	0.000360988	5.53e-05	-0.109581	0.030019	0.0207	0.083388	OPPOSITE	0.191948	0.0263588	chr12:111582410	FALSE	FALSE
AMD EUR	chr12:111694806:G:A	chr12:111694806:G:A	A	G	rs61941274	0.41211	0.41211	1.1e-09	110675816	112735153	2059.34	793	mQTL	chr12:111582410:G:C	rs10774629	ENSG00000257767	RP11-162P23.2	cg09553684	Retina	0.000360988	5.53e-05	-0.109581	0.030019	0.0207	0.083388	OPPOSITE	0.191948	0.0263588	chr12:111582410	FALSE	FALSE
AMD EUR	chr12:111694806:G:A	chr12:111694806:G:A	A	G	rs61941274	0.41211	0.41211	1.1e-09	110675816	112735153	2059.34	793	mQTL	chr12:111582410:G:C	rs10774629	ENSG00000089022	MAPKAPK5	cg11972180	Retina	1.7986e-13	5.53e-05	-0.184024	0.0227281	0.0207	0.083388	OPPOSITE	0.174178	0.0263043	chr12:111582410	FALSE	FALSE
AMD EUR	chr12:111694806:G:A	chr12:111694806:G:A	A	G	rs61941274	0.41211	0.41211	1.1e-09	110675816	112735153	2059.34	793	mQTL	chr12:111582410:G:C	rs10774629	ENSG00000234608	MAPKAPK5-AS1	cg11972180	Retina	1.7986e-13	5.53e-05	-0.184024	0.0227281	0.0207	0.083388	OPPOSITE	0.174178	0.0263043	chr12:111582410	FALSE	FALSE
AMD EUR	chr19:1031439:C:T	chr19:1031439:C:T	T	C	rs67538026	-0.105361	0.105361	2.6e-08	948322	1142512	194.19	929	mQTL	chr19:1031659:A:G	rs73503267	ENSG00000180448	ARHGAP45	cg18950617	Retina	0.000821763	4.51e-05	0.142915	0.0418542	0.0185	-0.075451	OPPOSITE	0.987103	0.0262191	chr19:1031659	FALSE	FALSE
AMD EUR	chr12:111694806:G:A	chr12:111694806:G:A	A	G	rs61941274	0.41211	0.41211	1.1e-09	110675816	112735153	2059.34	793	mQTL	chr12:111576697:C:T	rs12816310	ENSG00000111275	ALDH2	cg19186356	Retina	6.93753e-07	6.68e-05	0.161429	0.0311444	0.020518	0.081744	SAME	0.188494	0.0249401	chr12:111576697	FALSE	FALSE
AMD EUR	chr12:111694806:G:A	chr12:111694806:G:A	A	G	rs61941274	0.41211	0.41211	1.1e-09	110675816	112735153	2059.34	793	mQTL	chr12:111576697:C:T	rs12816310	ENSG00000257767	RP11-162P23.2	cg19186356	Retina	6.93753e-07	6.68e-05	0.161429	0.0311444	0.020518	0.081744	SAME	0.188494	0.0249401	chr12:111576697	FALSE	FALSE
AMD EUR	chr12:111694806:G:A	chr12:111694806:G:A	A	G	rs61941274	0.41211	0.41211	1.1e-09	110675816	112735153	2059.34	790	eQTL	chr12:111578212:A:C	rs7398705	ENSG00000089234	BRAP	NA	Retina	0.0173092	5.3e-05	-0.340669	0.142539	0.020592	0.08316	OPPOSITE	0.154671	0.0249054	chr12:111578212	FALSE	FALSE
AMD EUR	chr12:111694806:G:A	chr12:111694806:G:A	A	G	rs61941274	0.41211	0.41211	1.1e-09	110675816	112735153	2059.34	792	mQTL	chr12:111578212:A:C	rs7398705	ENSG00000198270	TMEM116	cg27393610	Retina	0.00041833	5.3e-05	0.137213	0.0380204	0.020592	0.08316	SAME	0.269269	0.0244793	chr12:111578212	FALSE	FALSE
AMD EUR	chr9:104899461:A:C	chr9:104899461:A:C	C	A	rs2740488	-0.105361	0.105361	1.2e-08	104816777	104960245	143.468	559	mQTL	chr9:104904491:T:C	rs2575877	ENSG00000165029	ABCA1	cg14313833	Retina	0.035217	0.00706	-0.0668541	0.0314593	0.017841	-0.048051	SAME	0.4718	0.0240595	chr9:104904491	FALSE	FALSE
AMD EUR	chr19:6718135:T:G	chr19:6718135:T:G	G	T	rs147859257	1.05082	1.05082	3.1e-28	5670846	7729841	2058.99	614	mQTL	chr19:6724329:C:T	rs163494	ENSG00000125652	ALKBH7	cg03895994	Retina	0.00521772	1.15e-55	-0.121101	0.0427192	0.020021	0.31322	OPPOSITE	0.873906	0.0237569	chr19:6724329	FALSE	FALSE
AMD EUR	chr20:58078668:T:TA	chr20:58078670:C:A	TA	T	rs201459901	-0.274437	0.274437	3.1e-16	57938173	58653252	715.079	189	mQTL	chr20:58007275:A:G	rs4811950	ENSG00000124209	RAB22A	cg10927178	Retina	0.102558	0.00215	-0.0625953	0.0381071	0.017221	0.052842	OPPOSITE	0.698484	0.0236461	chr20:58007275	FALSE	FALSE
AMD EUR	chr20:58078668:T:TA	chr20:58078670:C:A	TA	T	rs201459901	-0.274437	0.274437	3.1e-16	57938173	58653252	715.079	189	mQTL	chr20:58007275:A:G	rs4811950	ENSG00000124224	PPP4R1L	cg10927178	Retina	0.102558	0.00215	-0.0625953	0.0381071	0.017221	0.052842	OPPOSITE	0.698484	0.0236461	chr20:58007275	FALSE	FALSE
AMD EUR	chr9:104899461:A:C	chr9:104899461:A:C	C	A	rs2740488	-0.105361	0.105361	1.2e-08	104816777	104960245	143.468	559	mQTL	chr9:104904798:T:C	rs2575878	ENSG00000165029	ABCA1	cg14313833	Retina	0.0267338	0.00764	-0.0702894	0.0314156	0.017889	-0.047716	SAME	0.458007	0.0233561	chr9:104904798	FALSE	FALSE
AMD EUR	chr12:111694806:G:A	chr12:111694806:G:A	A	G	rs61941274	0.41211	0.41211	1.1e-09	110675816	112735153	2059.34	793	mQTL	chr12:111578212:A:C	rs7398705	ENSG00000089022	MAPKAPK5	cg11972180	Retina	8.64651e-14	5.3e-05	-0.185668	0.022575	0.020592	0.08316	OPPOSITE	0.153749	0.0232191	chr12:111578212	FALSE	FALSE
AMD EUR	chr12:111694806:G:A	chr12:111694806:G:A	A	G	rs61941274	0.41211	0.41211	1.1e-09	110675816	112735153	2059.34	793	mQTL	chr12:111578212:A:C	rs7398705	ENSG00000234608	MAPKAPK5-AS1	cg11972180	Retina	8.64651e-14	5.3e-05	-0.185668	0.022575	0.020592	0.08316	OPPOSITE	0.153749	0.0232191	chr12:111578212	FALSE	FALSE
AMD EUR	chr12:111694806:G:A	chr12:111694806:G:A	A	G	rs61941274	0.41211	0.41211	1.1e-09	110675816	112735153	2059.34	793	mQTL	chr12:111588579:A:G	rs7398196	ENSG00000111275	ALDH2	cg19186356	Retina	1.31541e-06	5.33e-05	0.158193	0.0313793	0.020749	0.083762	SAME	0.174426	0.0230788	chr12:111588579	FALSE	FALSE
AMD EUR	chr12:111694806:G:A	chr12:111694806:G:A	A	G	rs61941274	0.41211	0.41211	1.1e-09	110675816	112735153	2059.34	793	mQTL	chr12:111588579:A:G	rs7398196	ENSG00000257767	RP11-162P23.2	cg19186356	Retina	1.31541e-06	5.33e-05	0.158193	0.0313793	0.020749	0.083762	SAME	0.174426	0.0230788	chr12:111588579	FALSE	FALSE
AMD EUR	chr14:68302482:T:C	chr14:68302482:C:T	C	T	rs61985136	-0.105361	0.105361	1.6e-10	67660862	68556533	895.671	398	mQTL	chr14:68510254:C:T	rs2842344	ENSG00000029364	SLC39A9	cg23346107	Retina	0.0068533	1.61e-06	-0.166502	0.0607264	0.027234	-0.1306	SAME	0.0384694	0.022767	chr14:68510254	FALSE	FALSE
AMD EUR	chr14:68302482:T:C	chr14:68302482:C:T	C	T	rs61985136	-0.105361	0.105361	1.6e-10	67660862	68556533	895.671	398	mQTL	chr14:68510254:C:T	rs2842344	ENSG00000100632	ERH	cg23346107	Retina	0.0068533	1.61e-06	-0.166502	0.0607264	0.027234	-0.1306	SAME	0.0384694	0.022767	chr14:68510254	FALSE	FALSE
AMD EUR	chr19:45245104:G:C	chr19:45245104:G:C	C	G	rs73036519	-0.0943107	0.0943107	3.1e-07	45162939	45390057	227.118	664	mQTL	chr19:45237477:T:C	rs346745	ENSG00000007047	MARK4	cg20198684	Retina	2.3768e-06	3.77e-05	0.120467	0.0245465	0.017911	-0.073796	OPPOSITE	0.312891	0.0213118	chr19:45237477	FALSE	FALSE
AMD EUR	chr20:45986352:TTTTC:T	chr20:45986338:A:T	T	TTTTC	rs142450006	-0.162519	0.162519	2.4e-10	45736352	46236352	500	194	mQTL	chr20:45999502:C:T	rs11696767	ENSG00000100982	PCIF1	cg14527983	Retina	0.0346169	1.32e-05	0.0718042	0.0336758	0.016842	0.073342	SAME	0.0765688	0.0209873	chr20:45999502	FALSE	FALSE
AMD EUR	chr20:45986352:TTTTC:T	chr20:45986338:A:T	T	TTTTC	rs142450006	-0.162519	0.162519	2.4e-10	45736352	46236352	500	194	mQTL	chr20:45999741:C:T	rs11696804	ENSG00000100982	PCIF1	cg14527983	Retina	0.0345591	1.33e-05	0.0718076	0.0336664	0.016839	0.073307	SAME	0.0752577	0.020628	chr20:45999741	FALSE	FALSE
AMD EUR	chr12:111694806:G:A	chr12:111694806:G:A	A	G	rs61941274	0.41211	0.41211	1.1e-09	110675816	112735153	2059.34	793	mQTL	chr12:111585197:A:G	rs10774631	ENSG00000111275	ALDH2	cg19186356	Retina	1.36197e-06	5.5e-05	0.157854	0.0313606	0.020721	0.083499	SAME	0.154178	0.0203998	chr12:111585197	FALSE	FALSE
AMD EUR	chr12:111694806:G:A	chr12:111694806:G:A	A	G	rs61941274	0.41211	0.41211	1.1e-09	110675816	112735153	2059.34	793	mQTL	chr12:111585197:A:G	rs10774631	ENSG00000257767	RP11-162P23.2	cg19186356	Retina	1.36197e-06	5.5e-05	0.157854	0.0313606	0.020721	0.083499	SAME	0.154178	0.0203998	chr12:111585197	FALSE	FALSE
AMD EUR	chr12:111694806:G:A	chr12:111694806:G:A	A	G	rs61941274	0.41211	0.41211	1.1e-09	110675816	112735153	2059.34	699	mQTL	chr12:111576697:C:T	rs12816310	ENSG00000111252	SH2B3	cg02298094	Retina	1.47331e-17	6.68e-05	-0.395246	0.0407663	0.020518	0.081744	OPPOSITE	0.104011	0.0194461	chr12:111576697	FALSE	FALSE
AMD EUR	chr12:111694806:G:A	chr12:111694806:G:A	A	G	rs61941274	0.41211	0.41211	1.1e-09	110675816	112735153	2059.34	793	mQTL	chr12:111578212:A:C	rs7398705	ENSG00000111275	ALDH2	cg20884605	Retina	0.00109199	5.3e-05	0.152043	0.0456542	0.020592	0.08316	SAME	0.141009	0.0193064	chr12:111578212	FALSE	FALSE
AMD EUR	chr12:111694806:G:A	chr12:111694806:G:A	A	G	rs61941274	0.41211	0.41211	1.1e-09	110675816	112735153	2059.34	793	mQTL	chr12:111578212:A:C	rs7398705	ENSG00000257767	RP11-162P23.2	cg20884605	Retina	0.00109199	5.3e-05	0.152043	0.0456542	0.020592	0.08316	SAME	0.141009	0.0193064	chr12:111578212	FALSE	FALSE
AMD EUR	chr12:111694806:G:A	chr12:111694806:G:A	A	G	rs61941274	0.41211	0.41211	1.1e-09	110675816	112735153	2059.34	793	mQTL	chr12:111582410:G:C	rs10774629	ENSG00000111275	ALDH2	cg19186356	Retina	1.40003e-06	5.53e-05	0.157579	0.0313444	0.0207	0.083388	SAME	0.144629	0.0191363	chr12:111582410	FALSE	FALSE
AMD EUR	chr12:111694806:G:A	chr12:111694806:G:A	A	G	rs61941274	0.41211	0.41211	1.1e-09	110675816	112735153	2059.34	793	mQTL	chr12:111582410:G:C	rs10774629	ENSG00000257767	RP11-162P23.2	cg19186356	Retina	1.40003e-06	5.53e-05	0.157579	0.0313444	0.0207	0.083388	SAME	0.144629	0.0191363	chr12:111582410	FALSE	FALSE
AMD EUR	chr12:111694806:G:A	chr12:111694806:G:A	A	G	rs61941274	0.41211	0.41211	1.1e-09	110675816	112735153	2059.34	793	mQTL	chr12:111576697:C:T	rs12816310	ENSG00000111271	ACAD10	cg09553684	Retina	0.000297487	6.68e-05	-0.110854	0.0299265	0.020518	0.081744	OPPOSITE	0.130357	0.017901	chr12:111576697	FALSE	FALSE
AMD EUR	chr12:111694806:G:A	chr12:111694806:G:A	A	G	rs61941274	0.41211	0.41211	1.1e-09	110675816	112735153	2059.34	793	mQTL	chr12:111576697:C:T	rs12816310	ENSG00000257767	RP11-162P23.2	cg09553684	Retina	0.000297487	6.68e-05	-0.110854	0.0299265	0.020518	0.081744	OPPOSITE	0.130357	0.017901	chr12:111576697	FALSE	FALSE
AMD EUR	chr7:100393925:C:T	chr7:100393925:C:T	T	C	rs7803454	0.122218	0.122218	4.8e-09	99914532	100638465	723.933	453	eQTL	chr7:99959594:T:C	rs6962405	ENSG00000077454	LRCH4	NA	Retina	0.0127174	0.000557	-0.997757	0.398651	0.016833	0.058086	OPPOSITE	0.568111	0.0178769	chr7:99959594	FALSE	FALSE
AMD EUR	chr12:111694806:G:A	chr12:111694806:G:A	A	G	rs61941274	0.41211	0.41211	1.1e-09	110675816	112735153	2059.34	792	mQTL	chr12:111588579:A:G	rs7398196	ENSG00000198270	TMEM116	cg27393610	Retina	0.000650775	5.33e-05	0.133238	0.0382576	0.020749	0.083762	SAME	0.184404	0.0167642	chr12:111588579	FALSE	FALSE
AMD EUR	chr12:111694806:G:A	chr12:111694806:G:A	A	G	rs61941274	0.41211	0.41211	1.1e-09	110675816	112735153	2059.34	793	eQTL	chr12:111556082:A:G	rs593226	ENSG00000111275	ALDH2	NA	Retina	2.26715e-16	3.92e-05	-5.90515	0.689068	0.019565	-0.080391	SAME	0.191275	0.0162186	chr12:111556082	FALSE	FALSE
AMD EUR	chr20:45986352:TTTTC:T	chr20:45986338:A:T	T	TTTTC	rs142450006	-0.162519	0.162519	2.4e-10	45736352	46236352	500	194	mQTL	chr20:46014194:A:C	rs13969	ENSG00000124140	SLC12A5	cg07191594	Retina	4.071e-16	1.45e-05	0.259536	0.0283938	0.016942	0.073435	SAME	0.501239	0.016022	chr20:46014194	FALSE	FALSE
AMD EUR	chr12:111694806:G:A	chr12:111694806:G:A	A	G	rs61941274	0.41211	0.41211	1.1e-09	110675816	112735153	2059.34	792	mQTL	chr12:111576697:C:T	rs12816310	ENSG00000198270	TMEM116	cg27393610	Retina	0.000423834	6.68e-05	0.137094	0.0380261	0.020518	0.081744	SAME	0.17522	0.0159293	chr12:111576697	FALSE	FALSE
AMD EUR	chr19:45245104:G:C	chr19:45245104:G:C	C	G	rs73036519	-0.0943107	0.0943107	3.1e-07	45162939	45390057	227.118	664	mQTL	chr19:45237985:G:A	rs346744	ENSG00000007047	MARK4	cg20198684	Retina	1.14062e-05	2.39e-05	0.11316	0.0249177	0.017343	-0.073257	OPPOSITE	0.23323	0.0158859	chr19:45237985	FALSE	FALSE
AMD EUR	chr22:38080269:C:T	chr22:38080269:C:T	T	C	rs8135665	0.131028	0.131028	5.5e-11	37600688	38268926	668.238	453	eQTL	chr22:38081923:G:A	rs2235573	ENSG00000273899	NOL12	NA	Retina	0.0438972	1.38e-08	-0.158868	0.0785911	0.016403	0.093038	OPPOSITE	0.972024	0.0150611	chr22:38081923	FALSE	FALSE
AMD EUR	chr20:45986352:TTTTC:T	chr20:45986338:A:T	T	TTTTC	rs142450006	-0.162519	0.162519	2.4e-10	45736352	46236352	500	194	mQTL	chr20:46000706:G:A	rs11697325	ENSG00000100982	PCIF1	cg14527983	Retina	0.0343371	1.45e-05	0.0718781	0.0336574	0.016843	0.073001	SAME	0.054852	0.0150348	chr20:46000706	FALSE	FALSE
AMD EUR	chr12:111694806:G:A	chr12:111694806:G:A	A	G	rs61941274	0.41211	0.41211	1.1e-09	110675816	112735153	2059.34	793	mQTL	chr12:111576697:C:T	rs12816310	ENSG00000089022	MAPKAPK5	cg11972180	Retina	8.83946e-14	6.68e-05	-0.185622	0.0225798	0.020518	0.081744	OPPOSITE	0.0966368	0.014594	chr12:111576697	FALSE	FALSE
AMD EUR	chr12:111694806:G:A	chr12:111694806:G:A	A	G	rs61941274	0.41211	0.41211	1.1e-09	110675816	112735153	2059.34	793	mQTL	chr12:111576697:C:T	rs12816310	ENSG00000234608	MAPKAPK5-AS1	cg11972180	Retina	8.83946e-14	6.68e-05	-0.185622	0.0225798	0.020518	0.081744	OPPOSITE	0.0966368	0.014594	chr12:111576697	FALSE	FALSE
AMD EUR	chr19:45245104:G:C	chr19:45245104:G:C	C	G	rs73036519	-0.0943107	0.0943107	3.1e-07	45162939	45390057	227.118	664	mQTL	chr19:45237477:T:C	rs346745	ENSG00000007047	MARK4	cg01416317	Retina	0.00663587	3.77e-05	0.0631616	0.0229433	0.017911	-0.073796	OPPOSITE	0.418046	0.0144703	chr19:45237477	FALSE	FALSE
AMD EUR	chr19:45245104:G:C	chr19:45245104:G:C	C	G	rs73036519	-0.0943107	0.0943107	3.1e-07	45162939	45390057	227.118	664	mQTL	chr19:45237477:T:C	rs346745	ENSG00000283632	EXOC3L2	cg01416317	Retina	0.00663587	3.77e-05	0.0631616	0.0229433	0.017911	-0.073796	OPPOSITE	0.418046	0.0144703	chr19:45237477	FALSE	FALSE
AMD EUR	chr12:111694806:G:A	chr12:111694806:G:A	A	G	rs61941274	0.41211	0.41211	1.1e-09	110675816	112735153	2059.34	792	mQTL	chr12:111585197:A:G	rs10774631	ENSG00000198270	TMEM116	cg27393610	Retina	0.00070376	5.5e-05	0.132324	0.0382448	0.020721	0.083499	SAME	0.153573	0.0139614	chr12:111585197	FALSE	FALSE
AMD EUR	chr5:39327786:G:T	chr5:39327786:G:T	T	G	rs62358361	0.587787	0.587787	1.3e-14	38362854	40352636	1989.78	266	mQTL	chr5:39393630:C:T	rs2855511	ENSG00000113600	C9	cg23454504	Retina	0.0556452	0.00274	0.028685	0.014872	0.019332	-0.057882	OPPOSITE	0.0237563	0.0137924	chr5:39393630	FALSE	FALSE
AMD EUR	chr5:39327786:G:T	chr5:39327786:G:T	T	G	rs62358361	0.587787	0.587787	1.3e-14	38362854	40352636	1989.78	266	mQTL	chr5:39393630:C:T	rs2855511	ENSG00000153071	DAB2	cg23454504	Retina	0.0556452	0.00274	0.028685	0.014872	0.019332	-0.057882	OPPOSITE	0.0237563	0.0137924	chr5:39393630	FALSE	FALSE
AMD EUR	chr12:111694806:G:A	chr12:111694806:G:A	A	G	rs61941274	0.41211	0.41211	1.1e-09	110675816	112735153	2059.34	793	mQTL	chr12:111578212:A:C	rs7398705	ENSG00000257767	RP11-162P23.2	cg26649504	Retina	0.000118893	5.3e-05	-0.116282	0.0294219	0.020592	0.08316	OPPOSITE	0.118808	0.0136677	chr12:111578212	FALSE	FALSE
AMD EUR	chr20:45986352:TTTTC:T	chr20:45986338:A:T	T	TTTTC	rs142450006	-0.162519	0.162519	2.4e-10	45736352	46236352	500	194	eQTL	chr20:46004472:C:T	rs13040272	ENSG00000149634	SPATA25	NA	Retina	0.000122879	1.75e-05	0.0941598	0.0242783	0.016869	0.072402	SAME	0.0321293	0.0134519	chr20:46004472	FALSE	FALSE
AMD EUR	chr5:35494346:G:A	chr5:35494346:G:A	A	G	rs114092250	-0.356675	0.356675	2.1e-08	34785344	36350995	1565.65	437	eQTL	chr5:35710364:G:C	rs63191260	ENSG00000152582	SPEF2	NA	Retina	2.19563e-07	0.00912	-1.93902	0.367703	0.020074	-0.052339	SAME	0.0307473	0.0133696	chr5:35710364	FALSE	FALSE
AMD EUR	chr17:28322698:C:A	chr17:28322698:A:C	A	C	rs11080055	-0.0943107	0.0943107	1e-08	27998441	28520397	521.956	565	eQTL	chr17:28389802:C:T	rs4795433	ENSG00000004139	SARM1	NA	Retina	0.00150972	1.14e-08	2.11495	0.66199	0.016329	0.093154	SAME	0.0855865	0.0132829	chr17:28389802	FALSE	FALSE
AMD EUR	chr20:45986352:TTTTC:T	chr20:45986338:A:T	T	TTTTC	rs142450006	-0.162519	0.162519	2.4e-10	45736352	46236352	500	194	mQTL	chr20:46014194:A:C	rs13969	ENSG00000101457	DNTTIP1	cg15510984	Retina	0.0360639	1.45e-05	0.0646144	0.0305474	0.016942	0.073435	SAME	0.306863	0.0130973	chr20:46014194	FALSE	FALSE
AMD EUR	chr20:45986352:TTTTC:T	chr20:45986338:A:T	T	TTTTC	rs142450006	-0.162519	0.162519	2.4e-10	45736352	46236352	500	194	mQTL	chr20:46014194:A:C	rs13969	ENSG00000124116	WFDC3	cg15510984	Retina	0.0360639	1.45e-05	0.0646144	0.0305474	0.016942	0.073435	SAME	0.306863	0.0130973	chr20:46014194	FALSE	FALSE
AMD EUR	chr12:111694806:G:A	chr12:111694806:G:A	A	G	rs61941274	0.41211	0.41211	1.1e-09	110675816	112735153	2059.34	793	mQTL	chr12:111576697:C:T	rs12816310	ENSG00000111275	ALDH2	cg20884605	Retina	0.00109072	6.68e-05	0.152068	0.0456571	0.020518	0.081744	SAME	0.0938415	0.0128484	chr12:111576697	FALSE	FALSE
AMD EUR	chr12:111694806:G:A	chr12:111694806:G:A	A	G	rs61941274	0.41211	0.41211	1.1e-09	110675816	112735153	2059.34	793	mQTL	chr12:111576697:C:T	rs12816310	ENSG00000257767	RP11-162P23.2	cg20884605	Retina	0.00109072	6.68e-05	0.152068	0.0456571	0.020518	0.081744	SAME	0.0938415	0.0128484	chr12:111576697	FALSE	FALSE
AMD EUR	chr20:45986352:TTTTC:T	chr20:45986338:A:T	T	TTTTC	rs142450006	-0.162519	0.162519	2.4e-10	45736352	46236352	500	194	eQTL	chr20:46004666:G:T	rs6104418	ENSG00000149634	SPATA25	NA	Retina	0.000121653	1.79e-05	0.0942256	0.0242795	0.016867	0.072306	SAME	0.030509	0.0127735	chr20:46004666	FALSE	FALSE
AMD EUR	chr12:111694806:G:A	chr12:111694806:G:A	A	G	rs61941274	0.41211	0.41211	1.1e-09	110675816	112735153	2059.34	792	mQTL	chr12:111582410:G:C	rs10774629	ENSG00000198270	TMEM116	cg27393610	Retina	0.000750873	5.53e-05	0.131563	0.0382336	0.0207	0.083388	SAME	0.136765	0.0124333	chr12:111582410	FALSE	FALSE
AMD EUR	chr12:111694806:G:A	chr12:111694806:G:A	A	G	rs61941274	0.41211	0.41211	1.1e-09	110675816	112735153	2059.34	793	mQTL	chr12:111588579:A:G	rs7398196	ENSG00000257767	RP11-162P23.2	cg26649504	Retina	0.000131403	5.33e-05	-0.115976	0.0295427	0.020749	0.083762	OPPOSITE	0.106291	0.0122278	chr12:111588579	FALSE	FALSE
AMD EUR	chr20:45986352:TTTTC:T	chr20:45986338:A:T	T	TTTTC	rs142450006	-0.162519	0.162519	2.4e-10	45736352	46236352	500	194	eQTL	chr20:45999502:C:T	rs11696767	ENSG00000149634	SPATA25	NA	Retina	0.000208727	1.32e-05	0.0903633	0.0241445	0.016842	0.073342	SAME	0.0289823	0.0121343	chr20:45999502	FALSE	FALSE
AMD EUR	chr20:45986352:TTTTC:T	chr20:45986338:A:T	T	TTTTC	rs142450006	-0.162519	0.162519	2.4e-10	45736352	46236352	500	194	eQTL	chr20:45999741:C:T	rs11696804	ENSG00000149634	SPATA25	NA	Retina	0.000208768	1.33e-05	0.09036	0.024144	0.016839	0.073307	SAME	0.028299	0.0118482	chr20:45999741	FALSE	FALSE
AMD EUR	chr19:1031439:C:T	chr19:1031439:C:T	T	C	rs67538026	-0.105361	0.105361	2.6e-08	948322	1142512	194.19	929	eQTL	chr19:1025866:G:A	rs12979724	ENSG00000182087	TMEM259	NA	Retina	0.000982879	0.000137	-1.89554	0.570962	0.018468	-0.070397	SAME	0.0187561	0.0115872	chr19:1025866	FALSE	FALSE
AMD EUR	chr19:44908684:T:C	chr19:44908684:T:C	C	T	rs429358	-0.356675	0.356675	2.4e-42	43966904	45923987	1957.08	514	eQTL	chr19:44908684:T:C	rs429358	ENSG00000167380	ZNF226	NA	Retina	0.00689598	2.39e-42	-1.33802	0.492668	0.026216	-0.3542	SAME	0.735818	0.0112747	chr19:44908684	FALSE	FALSE
AMD EUR	chr5:39327786:G:T	chr5:39327786:G:T	T	G	rs62358361	0.587787	0.587787	1.3e-14	38362854	40352636	1989.78	165	mQTL	chr5:39400254:T:C	rs10043562	ENSG00000249740	OSMR-AS1	cg03661461	Retina	0.3463	0.0041	-0.0346322	0.0366572	0.019392	0.055628	OPPOSITE	0.703186	0.011271	chr5:39400254	FALSE	FALSE
AMD EUR	chr19:44908684:T:C	chr19:44908684:T:C	C	T	rs429358	-0.356675	0.356675	2.4e-42	43966904	45923987	1957.08	966	mQTL	chr19:44912456:G:A	rs10414043	ENSG00000170684	ZNF296	cg18487515	Retina	0.00502497	8.67e-32	0.128645	0.0451786	0.028456	-0.33102	OPPOSITE	0.801254	0.0112101	chr19:44912456	FALSE	FALSE
AMD EUR	chr19:44908684:T:C	chr19:44908684:T:C	C	T	rs429358	-0.356675	0.356675	2.4e-42	43966904	45923987	1957.08	966	mQTL	chr19:44912456:G:A	rs10414043	ENSG00000267348	CTB-179K24.3	cg18487515	Retina	0.00502497	8.67e-32	0.128645	0.0451786	0.028456	-0.33102	OPPOSITE	0.801254	0.0112101	chr19:44912456	FALSE	FALSE
AMD EUR	chr5:39327786:G:T	chr5:39327786:G:T	T	G	rs62358361	0.587787	0.587787	1.3e-14	38362854	40352636	1989.78	266	mQTL	chr5:39394391:G:C	rs1050903	ENSG00000113600	C9	cg23454504	Retina	0.0564027	0.00284	0.0285217	0.0148336	0.019299	-0.057571	OPPOSITE	0.0192821	0.0111947	chr5:39394391	FALSE	FALSE
AMD EUR	chr5:39327786:G:T	chr5:39327786:G:T	T	G	rs62358361	0.587787	0.587787	1.3e-14	38362854	40352636	1989.78	266	mQTL	chr5:39394391:G:C	rs1050903	ENSG00000153071	DAB2	cg23454504	Retina	0.0564027	0.00284	0.0285217	0.0148336	0.019299	-0.057571	OPPOSITE	0.0192821	0.0111947	chr5:39394391	FALSE	FALSE
AMD EUR	chr20:45986352:TTTTC:T	chr20:45986338:A:T	T	TTTTC	rs142450006	-0.162519	0.162519	2.4e-10	45736352	46236352	500	194	eQTL	chr20:46014194:A:C	rs13969	ENSG00000204044	RP11-465L10.10	NA	Retina	2.85682e-06	1.45e-05	0.104329	0.0219707	0.016942	0.073435	SAME	0.121177	0.0111725	chr20:46014194	FALSE	FALSE
AMD EUR	chr12:111694806:G:A	chr12:111694806:G:A	A	G	rs61941274	0.41211	0.41211	1.1e-09	110675816	112735153	2059.34	793	eQTL	chr12:111576697:C:T	rs12816310	ENSG00000089022	MAPKAPK5	NA	Retina	7.25507e-08	6.68e-05	1.89931	0.346141	0.020518	0.081744	SAME	0.0666207	0.0110636	chr12:111576697	FALSE	FALSE
AMD EUR	chr12:111694806:G:A	chr12:111694806:G:A	A	G	rs61941274	0.41211	0.41211	1.1e-09	110675816	112735153	2059.34	793	eQTL	chr12:111588579:A:G	rs7398196	ENSG00000234608	MAPKAPK5-AS1	NA	Retina	0.00186658	5.33e-05	-0.371022	0.11848	0.020749	0.083762	OPPOSITE	0.219119	0.0106936	chr12:111588579	FALSE	FALSE
AMD EUR	chr12:111694806:G:A	chr12:111694806:G:A	A	G	rs61941274	0.41211	0.41211	1.1e-09	110675816	112735153	2059.34	792	eQTL	chr12:111588579:A:G	rs7398196	ENSG00000173064	HECTD4	NA	Retina	0.0394909	5.33e-05	1.97733	0.957182	0.020749	0.083762	SAME	0.202734	0.0106623	chr12:111588579	FALSE	FALSE
AMD EUR	chr12:111694806:G:A	chr12:111694806:G:A	A	G	rs61941274	0.41211	0.41211	1.1e-09	110675816	112735153	2059.34	792	eQTL	chr12:111578212:A:C	rs7398705	ENSG00000173064	HECTD4	NA	Retina	0.0359491	5.3e-05	2.01059	0.955337	0.020592	0.08316	SAME	0.201743	0.0106102	chr12:111578212	FALSE	FALSE
AMD EUR	chr12:111694806:G:A	chr12:111694806:G:A	A	G	rs61941274	0.41211	0.41211	1.1e-09	110675816	112735153	2059.34	793	mQTL	chr12:111585197:A:G	rs10774631	ENSG00000257767	RP11-162P23.2	cg26649504	Retina	0.000139175	5.5e-05	-0.115472	0.0295291	0.020721	0.083499	OPPOSITE	0.0899961	0.0103532	chr12:111585197	FALSE	FALSE
AMD EUR	chr7:100393925:C:T	chr7:100393925:C:T	T	C	rs7803454	0.122218	0.122218	4.8e-09	99914532	100638465	723.933	453	mQTL	chr7:99955544:C:G	rs2525548	ENSG00000195401	Y_RNA	cg11013060	Retina	2.3629e-09	0.000315	-0.331739	0.0521991	0.01678	-0.060442	SAME	0.0208295	0.0103358	chr7:99955544	TRUE	FALSE
AMD EUR	chr7:100393925:C:T	chr7:100393925:C:T	T	C	rs7803454	0.122218	0.122218	4.8e-09	99914532	100638465	723.933	453	mQTL	chr7:99955544:C:G	rs2525548	ENSG00000199200	Y_RNA	cg11013060	Retina	2.3629e-09	0.000315	-0.331739	0.0521991	0.01678	-0.060442	SAME	0.0208295	0.0103358	chr7:99955544	TRUE	FALSE
AMD EUR	chr7:100393925:C:T	chr7:100393925:C:T	T	C	rs7803454	0.122218	0.122218	4.8e-09	99914532	100638465	723.933	453	mQTL	chr7:99955544:C:G	rs2525548	ENSG00000199201	Y_RNA	cg11013060	Retina	2.3629e-09	0.000315	-0.331739	0.0521991	0.01678	-0.060442	SAME	0.0208295	0.0103358	chr7:99955544	TRUE	FALSE
AMD EUR	chr7:100393925:C:T	chr7:100393925:C:T	T	C	rs7803454	0.122218	0.122218	4.8e-09	99914532	100638465	723.933	453	mQTL	chr7:99955544:C:G	rs2525548	ENSG00000199203	Y_RNA	cg11013060	Retina	2.3629e-09	0.000315	-0.331739	0.0521991	0.01678	-0.060442	SAME	0.0208295	0.0103358	chr7:99955544	TRUE	FALSE
AMD EUR	chr7:100393925:C:T	chr7:100393925:C:T	T	C	rs7803454	0.122218	0.122218	4.8e-09	99914532	100638465	723.933	453	mQTL	chr7:99955544:C:G	rs2525548	ENSG00000199204	Y_RNA	cg11013060	Retina	2.3629e-09	0.000315	-0.331739	0.0521991	0.01678	-0.060442	SAME	0.0208295	0.0103358	chr7:99955544	TRUE	FALSE
AMD EUR	chr7:100393925:C:T	chr7:100393925:C:T	T	C	rs7803454	0.122218	0.122218	4.8e-09	99914532	100638465	723.933	453	mQTL	chr7:99955544:C:G	rs2525548	ENSG00000199220	Y_RNA	cg11013060	Retina	2.3629e-09	0.000315	-0.331739	0.0521991	0.01678	-0.060442	SAME	0.0208295	0.0103358	chr7:99955544	TRUE	FALSE
AMD EUR	chr7:100393925:C:T	chr7:100393925:C:T	T	C	rs7803454	0.122218	0.122218	4.8e-09	99914532	100638465	723.933	453	mQTL	chr7:99955544:C:G	rs2525548	ENSG00000199222	Y_RNA	cg11013060	Retina	2.3629e-09	0.000315	-0.331739	0.0521991	0.01678	-0.060442	SAME	0.0208295	0.0103358	chr7:99955544	TRUE	FALSE
AMD EUR	chr7:100393925:C:T	chr7:100393925:C:T	T	C	rs7803454	0.122218	0.122218	4.8e-09	99914532	100638465	723.933	453	mQTL	chr7:99955544:C:G	rs2525548	ENSG00000199223	Y_RNA	cg11013060	Retina	2.3629e-09	0.000315	-0.331739	0.0521991	0.01678	-0.060442	SAME	0.0208295	0.0103358	chr7:99955544	TRUE	FALSE
AMD EUR	chr7:100393925:C:T	chr7:100393925:C:T	T	C	rs7803454	0.122218	0.122218	4.8e-09	99914532	100638465	723.933	453	mQTL	chr7:99955544:C:G	rs2525548	ENSG00000199224	Y_RNA	cg11013060	Retina	2.3629e-09	0.000315	-0.331739	0.0521991	0.01678	-0.060442	SAME	0.0208295	0.0103358	chr7:99955544	TRUE	FALSE
AMD EUR	chr7:100393925:C:T	chr7:100393925:C:T	T	C	rs7803454	0.122218	0.122218	4.8e-09	99914532	100638465	723.933	453	mQTL	chr7:99955544:C:G	rs2525548	ENSG00000199241	Y_RNA	cg11013060	Retina	2.3629e-09	0.000315	-0.331739	0.0521991	0.01678	-0.060442	SAME	0.0208295	0.0103358	chr7:99955544	TRUE	FALSE
AMD EUR	chr7:100393925:C:T	chr7:100393925:C:T	T	C	rs7803454	0.122218	0.122218	4.8e-09	99914532	100638465	723.933	453	mQTL	chr7:99955544:C:G	rs2525548	ENSG00000199245	Y_RNA	cg11013060	Retina	2.3629e-09	0.000315	-0.331739	0.0521991	0.01678	-0.060442	SAME	0.0208295	0.0103358	chr7:99955544	TRUE	FALSE
AMD EUR	chr7:100393925:C:T	chr7:100393925:C:T	T	C	rs7803454	0.122218	0.122218	4.8e-09	99914532	100638465	723.933	453	mQTL	chr7:99955544:C:G	rs2525548	ENSG00000199263	Y_RNA	cg11013060	Retina	2.3629e-09	0.000315	-0.331739	0.0521991	0.01678	-0.060442	SAME	0.0208295	0.0103358	chr7:99955544	TRUE	FALSE
AMD EUR	chr7:100393925:C:T	chr7:100393925:C:T	T	C	rs7803454	0.122218	0.122218	4.8e-09	99914532	100638465	723.933	453	mQTL	chr7:99955544:C:G	rs2525548	ENSG00000199273	Y_RNA	cg11013060	Retina	2.3629e-09	0.000315	-0.331739	0.0521991	0.01678	-0.060442	SAME	0.0208295	0.0103358	chr7:99955544	TRUE	FALSE
AMD EUR	chr7:100393925:C:T	chr7:100393925:C:T	T	C	rs7803454	0.122218	0.122218	4.8e-09	99914532	100638465	723.933	453	mQTL	chr7:99955544:C:G	rs2525548	ENSG00000199285	Y_RNA	cg11013060	Retina	2.3629e-09	0.000315	-0.331739	0.0521991	0.01678	-0.060442	SAME	0.0208295	0.0103358	chr7:99955544	TRUE	FALSE
AMD EUR	chr7:100393925:C:T	chr7:100393925:C:T	T	C	rs7803454	0.122218	0.122218	4.8e-09	99914532	100638465	723.933	453	mQTL	chr7:99955544:C:G	rs2525548	ENSG00000199290	Y_RNA	cg11013060	Retina	2.3629e-09	0.000315	-0.331739	0.0521991	0.01678	-0.060442	SAME	0.0208295	0.0103358	chr7:99955544	TRUE	FALSE
AMD EUR	chr7:100393925:C:T	chr7:100393925:C:T	T	C	rs7803454	0.122218	0.122218	4.8e-09	99914532	100638465	723.933	453	mQTL	chr7:99955544:C:G	rs2525548	ENSG00000199291	Y_RNA	cg11013060	Retina	2.3629e-09	0.000315	-0.331739	0.0521991	0.01678	-0.060442	SAME	0.0208295	0.0103358	chr7:99955544	TRUE	FALSE
AMD EUR	chr7:100393925:C:T	chr7:100393925:C:T	T	C	rs7803454	0.122218	0.122218	4.8e-09	99914532	100638465	723.933	453	mQTL	chr7:99955544:C:G	rs2525548	ENSG00000199303	Y_RNA	cg11013060	Retina	2.3629e-09	0.000315	-0.331739	0.0521991	0.01678	-0.060442	SAME	0.0208295	0.0103358	chr7:99955544	TRUE	FALSE
AMD EUR	chr7:100393925:C:T	chr7:100393925:C:T	T	C	rs7803454	0.122218	0.122218	4.8e-09	99914532	100638465	723.933	453	mQTL	chr7:99955544:C:G	rs2525548	ENSG00000199331	Y_RNA	cg11013060	Retina	2.3629e-09	0.000315	-0.331739	0.0521991	0.01678	-0.060442	SAME	0.0208295	0.0103358	chr7:99955544	TRUE	FALSE
AMD EUR	chr7:100393925:C:T	chr7:100393925:C:T	T	C	rs7803454	0.122218	0.122218	4.8e-09	99914532	100638465	723.933	453	mQTL	chr7:99955544:C:G	rs2525548	ENSG00000199332	Y_RNA	cg11013060	Retina	2.3629e-09	0.000315	-0.331739	0.0521991	0.01678	-0.060442	SAME	0.0208295	0.0103358	chr7:99955544	TRUE	FALSE
AMD EUR	chr7:100393925:C:T	chr7:100393925:C:T	T	C	rs7803454	0.122218	0.122218	4.8e-09	99914532	100638465	723.933	453	mQTL	chr7:99955544:C:G	rs2525548	ENSG00000199349	Y_RNA	cg11013060	Retina	2.3629e-09	0.000315	-0.331739	0.0521991	0.01678	-0.060442	SAME	0.0208295	0.0103358	chr7:99955544	TRUE	FALSE
AMD EUR	chr7:100393925:C:T	chr7:100393925:C:T	T	C	rs7803454	0.122218	0.122218	4.8e-09	99914532	100638465	723.933	453	mQTL	chr7:99955544:C:G	rs2525548	ENSG00000199357	Y_RNA	cg11013060	Retina	2.3629e-09	0.000315	-0.331739	0.0521991	0.01678	-0.060442	SAME	0.0208295	0.0103358	chr7:99955544	TRUE	FALSE
AMD EUR	chr7:100393925:C:T	chr7:100393925:C:T	T	C	rs7803454	0.122218	0.122218	4.8e-09	99914532	100638465	723.933	453	mQTL	chr7:99955544:C:G	rs2525548	ENSG00000199362	Y_RNA	cg11013060	Retina	2.3629e-09	0.000315	-0.331739	0.0521991	0.01678	-0.060442	SAME	0.0208295	0.0103358	chr7:99955544	TRUE	FALSE
AMD EUR	chr7:100393925:C:T	chr7:100393925:C:T	T	C	rs7803454	0.122218	0.122218	4.8e-09	99914532	100638465	723.933	453	mQTL	chr7:99955544:C:G	rs2525548	ENSG00000199366	Y_RNA	cg11013060	Retina	2.3629e-09	0.000315	-0.331739	0.0521991	0.01678	-0.060442	SAME	0.0208295	0.0103358	chr7:99955544	TRUE	FALSE
AMD EUR	chr7:100393925:C:T	chr7:100393925:C:T	T	C	rs7803454	0.122218	0.122218	4.8e-09	99914532	100638465	723.933	453	mQTL	chr7:99955544:C:G	rs2525548	ENSG00000199378	Y_RNA	cg11013060	Retina	2.3629e-09	0.000315	-0.331739	0.0521991	0.01678	-0.060442	SAME	0.0208295	0.0103358	chr7:99955544	TRUE	FALSE
AMD EUR	chr7:100393925:C:T	chr7:100393925:C:T	T	C	rs7803454	0.122218	0.122218	4.8e-09	99914532	100638465	723.933	453	mQTL	chr7:99955544:C:G	rs2525548	ENSG00000199398	Y_RNA	cg11013060	Retina	2.3629e-09	0.000315	-0.331739	0.0521991	0.01678	-0.060442	SAME	0.0208295	0.0103358	chr7:99955544	TRUE	FALSE
AMD EUR	chr7:100393925:C:T	chr7:100393925:C:T	T	C	rs7803454	0.122218	0.122218	4.8e-09	99914532	100638465	723.933	453	mQTL	chr7:99955544:C:G	rs2525548	ENSG00000199409	Y_RNA	cg11013060	Retina	2.3629e-09	0.000315	-0.331739	0.0521991	0.01678	-0.060442	SAME	0.0208295	0.0103358	chr7:99955544	TRUE	FALSE
AMD EUR	chr7:100393925:C:T	chr7:100393925:C:T	T	C	rs7803454	0.122218	0.122218	4.8e-09	99914532	100638465	723.933	453	mQTL	chr7:99955544:C:G	rs2525548	ENSG00000199410	Y_RNA	cg11013060	Retina	2.3629e-09	0.000315	-0.331739	0.0521991	0.01678	-0.060442	SAME	0.0208295	0.0103358	chr7:99955544	TRUE	FALSE
AMD EUR	chr7:100393925:C:T	chr7:100393925:C:T	T	C	rs7803454	0.122218	0.122218	4.8e-09	99914532	100638465	723.933	453	mQTL	chr7:99955544:C:G	rs2525548	ENSG00000199424	Y_RNA	cg11013060	Retina	2.3629e-09	0.000315	-0.331739	0.0521991	0.01678	-0.060442	SAME	0.0208295	0.0103358	chr7:99955544	TRUE	FALSE
AMD EUR	chr7:100393925:C:T	chr7:100393925:C:T	T	C	rs7803454	0.122218	0.122218	4.8e-09	99914532	100638465	723.933	453	mQTL	chr7:99955544:C:G	rs2525548	ENSG00000199440	Y_RNA	cg11013060	Retina	2.3629e-09	0.000315	-0.331739	0.0521991	0.01678	-0.060442	SAME	0.0208295	0.0103358	chr7:99955544	TRUE	FALSE
AMD EUR	chr7:100393925:C:T	chr7:100393925:C:T	T	C	rs7803454	0.122218	0.122218	4.8e-09	99914532	100638465	723.933	453	mQTL	chr7:99955544:C:G	rs2525548	ENSG00000199442	Y_RNA	cg11013060	Retina	2.3629e-09	0.000315	-0.331739	0.0521991	0.01678	-0.060442	SAME	0.0208295	0.0103358	chr7:99955544	TRUE	FALSE
AMD EUR	chr7:100393925:C:T	chr7:100393925:C:T	T	C	rs7803454	0.122218	0.122218	4.8e-09	99914532	100638465	723.933	453	mQTL	chr7:99955544:C:G	rs2525548	ENSG00000199444	Y_RNA	cg11013060	Retina	2.3629e-09	0.000315	-0.331739	0.0521991	0.01678	-0.060442	SAME	0.0208295	0.0103358	chr7:99955544	TRUE	FALSE
AMD EUR	chr7:100393925:C:T	chr7:100393925:C:T	T	C	rs7803454	0.122218	0.122218	4.8e-09	99914532	100638465	723.933	453	mQTL	chr7:99955544:C:G	rs2525548	ENSG00000199459	Y_RNA	cg11013060	Retina	2.3629e-09	0.000315	-0.331739	0.0521991	0.01678	-0.060442	SAME	0.0208295	0.0103358	chr7:99955544	TRUE	FALSE
AMD EUR	chr7:100393925:C:T	chr7:100393925:C:T	T	C	rs7803454	0.122218	0.122218	4.8e-09	99914532	100638465	723.933	453	mQTL	chr7:99955544:C:G	rs2525548	ENSG00000199461	Y_RNA	cg11013060	Retina	2.3629e-09	0.000315	-0.331739	0.0521991	0.01678	-0.060442	SAME	0.0208295	0.0103358	chr7:99955544	TRUE	FALSE
AMD EUR	chr7:100393925:C:T	chr7:100393925:C:T	T	C	rs7803454	0.122218	0.122218	4.8e-09	99914532	100638465	723.933	453	mQTL	chr7:99955544:C:G	rs2525548	ENSG00000199466	Y_RNA	cg11013060	Retina	2.3629e-09	0.000315	-0.331739	0.0521991	0.01678	-0.060442	SAME	0.0208295	0.0103358	chr7:99955544	TRUE	FALSE
AMD EUR	chr7:100393925:C:T	chr7:100393925:C:T	T	C	rs7803454	0.122218	0.122218	4.8e-09	99914532	100638465	723.933	453	mQTL	chr7:99955544:C:G	rs2525548	ENSG00000199471	Y_RNA	cg11013060	Retina	2.3629e-09	0.000315	-0.331739	0.0521991	0.01678	-0.060442	SAME	0.0208295	0.0103358	chr7:99955544	TRUE	FALSE
AMD EUR	chr7:100393925:C:T	chr7:100393925:C:T	T	C	rs7803454	0.122218	0.122218	4.8e-09	99914532	100638465	723.933	453	mQTL	chr7:99955544:C:G	rs2525548	ENSG00000199472	Y_RNA	cg11013060	Retina	2.3629e-09	0.000315	-0.331739	0.0521991	0.01678	-0.060442	SAME	0.0208295	0.0103358	chr7:99955544	TRUE	FALSE
AMD EUR	chr7:100393925:C:T	chr7:100393925:C:T	T	C	rs7803454	0.122218	0.122218	4.8e-09	99914532	100638465	723.933	453	mQTL	chr7:99955544:C:G	rs2525548	ENSG00000199476	Y_RNA	cg11013060	Retina	2.3629e-09	0.000315	-0.331739	0.0521991	0.01678	-0.060442	SAME	0.0208295	0.0103358	chr7:99955544	TRUE	FALSE
AMD EUR	chr7:100393925:C:T	chr7:100393925:C:T	T	C	rs7803454	0.122218	0.122218	4.8e-09	99914532	100638465	723.933	453	mQTL	chr7:99955544:C:G	rs2525548	ENSG00000199487	Y_RNA	cg11013060	Retina	2.3629e-09	0.000315	-0.331739	0.0521991	0.01678	-0.060442	SAME	0.0208295	0.0103358	chr7:99955544	TRUE	FALSE
AMD EUR	chr7:100393925:C:T	chr7:100393925:C:T	T	C	rs7803454	0.122218	0.122218	4.8e-09	99914532	100638465	723.933	453	mQTL	chr7:99955544:C:G	rs2525548	ENSG00000199490	Y_RNA	cg11013060	Retina	2.3629e-09	0.000315	-0.331739	0.0521991	0.01678	-0.060442	SAME	0.0208295	0.0103358	chr7:99955544	TRUE	FALSE
AMD EUR	chr7:100393925:C:T	chr7:100393925:C:T	T	C	rs7803454	0.122218	0.122218	4.8e-09	99914532	100638465	723.933	453	mQTL	chr7:99955544:C:G	rs2525548	ENSG00000199515	Y_RNA	cg11013060	Retina	2.3629e-09	0.000315	-0.331739	0.0521991	0.01678	-0.060442	SAME	0.0208295	0.0103358	chr7:99955544	TRUE	FALSE
AMD EUR	chr7:100393925:C:T	chr7:100393925:C:T	T	C	rs7803454	0.122218	0.122218	4.8e-09	99914532	100638465	723.933	453	mQTL	chr7:99955544:C:G	rs2525548	ENSG00000199516	Y_RNA	cg11013060	Retina	2.3629e-09	0.000315	-0.331739	0.0521991	0.01678	-0.060442	SAME	0.0208295	0.0103358	chr7:99955544	TRUE	FALSE
AMD EUR	chr7:100393925:C:T	chr7:100393925:C:T	T	C	rs7803454	0.122218	0.122218	4.8e-09	99914532	100638465	723.933	453	mQTL	chr7:99955544:C:G	rs2525548	ENSG00000199530	Y_RNA	cg11013060	Retina	2.3629e-09	0.000315	-0.331739	0.0521991	0.01678	-0.060442	SAME	0.0208295	0.0103358	chr7:99955544	TRUE	FALSE
AMD EUR	chr7:100393925:C:T	chr7:100393925:C:T	T	C	rs7803454	0.122218	0.122218	4.8e-09	99914532	100638465	723.933	453	mQTL	chr7:99955544:C:G	rs2525548	ENSG00000199540	Y_RNA	cg11013060	Retina	2.3629e-09	0.000315	-0.331739	0.0521991	0.01678	-0.060442	SAME	0.0208295	0.0103358	chr7:99955544	TRUE	FALSE
AMD EUR	chr7:100393925:C:T	chr7:100393925:C:T	T	C	rs7803454	0.122218	0.122218	4.8e-09	99914532	100638465	723.933	453	mQTL	chr7:99955544:C:G	rs2525548	ENSG00000199546	Y_RNA	cg11013060	Retina	2.3629e-09	0.000315	-0.331739	0.0521991	0.01678	-0.060442	SAME	0.0208295	0.0103358	chr7:99955544	TRUE	FALSE
AMD EUR	chr7:100393925:C:T	chr7:100393925:C:T	T	C	rs7803454	0.122218	0.122218	4.8e-09	99914532	100638465	723.933	453	mQTL	chr7:99955544:C:G	rs2525548	ENSG00000199550	Y_RNA	cg11013060	Retina	2.3629e-09	0.000315	-0.331739	0.0521991	0.01678	-0.060442	SAME	0.0208295	0.0103358	chr7:99955544	TRUE	FALSE
AMD EUR	chr7:100393925:C:T	chr7:100393925:C:T	T	C	rs7803454	0.122218	0.122218	4.8e-09	99914532	100638465	723.933	453	mQTL	chr7:99955544:C:G	rs2525548	ENSG00000199565	Y_RNA	cg11013060	Retina	2.3629e-09	0.000315	-0.331739	0.0521991	0.01678	-0.060442	SAME	0.0208295	0.0103358	chr7:99955544	TRUE	FALSE
AMD EUR	chr7:100393925:C:T	chr7:100393925:C:T	T	C	rs7803454	0.122218	0.122218	4.8e-09	99914532	100638465	723.933	453	mQTL	chr7:99955544:C:G	rs2525548	ENSG00000199567	Y_RNA	cg11013060	Retina	2.3629e-09	0.000315	-0.331739	0.0521991	0.01678	-0.060442	SAME	0.0208295	0.0103358	chr7:99955544	TRUE	FALSE
AMD EUR	chr7:100393925:C:T	chr7:100393925:C:T	T	C	rs7803454	0.122218	0.122218	4.8e-09	99914532	100638465	723.933	453	mQTL	chr7:99955544:C:G	rs2525548	ENSG00000199580	Y_RNA	cg11013060	Retina	2.3629e-09	0.000315	-0.331739	0.0521991	0.01678	-0.060442	SAME	0.0208295	0.0103358	chr7:99955544	TRUE	FALSE
AMD EUR	chr7:100393925:C:T	chr7:100393925:C:T	T	C	rs7803454	0.122218	0.122218	4.8e-09	99914532	100638465	723.933	453	mQTL	chr7:99955544:C:G	rs2525548	ENSG00000199584	Y_RNA	cg11013060	Retina	2.3629e-09	0.000315	-0.331739	0.0521991	0.01678	-0.060442	SAME	0.0208295	0.0103358	chr7:99955544	TRUE	FALSE
AMD EUR	chr7:100393925:C:T	chr7:100393925:C:T	T	C	rs7803454	0.122218	0.122218	4.8e-09	99914532	100638465	723.933	453	mQTL	chr7:99955544:C:G	rs2525548	ENSG00000199591	Y_RNA	cg11013060	Retina	2.3629e-09	0.000315	-0.331739	0.0521991	0.01678	-0.060442	SAME	0.0208295	0.0103358	chr7:99955544	TRUE	FALSE
AMD EUR	chr7:100393925:C:T	chr7:100393925:C:T	T	C	rs7803454	0.122218	0.122218	4.8e-09	99914532	100638465	723.933	453	mQTL	chr7:99955544:C:G	rs2525548	ENSG00000199595	Y_RNA	cg11013060	Retina	2.3629e-09	0.000315	-0.331739	0.0521991	0.01678	-0.060442	SAME	0.0208295	0.0103358	chr7:99955544	TRUE	FALSE
AMD EUR	chr7:100393925:C:T	chr7:100393925:C:T	T	C	rs7803454	0.122218	0.122218	4.8e-09	99914532	100638465	723.933	453	mQTL	chr7:99955544:C:G	rs2525548	ENSG00000199630	Y_RNA	cg11013060	Retina	2.3629e-09	0.000315	-0.331739	0.0521991	0.01678	-0.060442	SAME	0.0208295	0.0103358	chr7:99955544	TRUE	FALSE
AMD EUR	chr7:100393925:C:T	chr7:100393925:C:T	T	C	rs7803454	0.122218	0.122218	4.8e-09	99914532	100638465	723.933	453	mQTL	chr7:99955544:C:G	rs2525548	ENSG00000199635	Y_RNA	cg11013060	Retina	2.3629e-09	0.000315	-0.331739	0.0521991	0.01678	-0.060442	SAME	0.0208295	0.0103358	chr7:99955544	TRUE	FALSE
AMD EUR	chr7:100393925:C:T	chr7:100393925:C:T	T	C	rs7803454	0.122218	0.122218	4.8e-09	99914532	100638465	723.933	453	mQTL	chr7:99955544:C:G	rs2525548	ENSG00000199636	Y_RNA	cg11013060	Retina	2.3629e-09	0.000315	-0.331739	0.0521991	0.01678	-0.060442	SAME	0.0208295	0.0103358	chr7:99955544	TRUE	FALSE
AMD EUR	chr7:100393925:C:T	chr7:100393925:C:T	T	C	rs7803454	0.122218	0.122218	4.8e-09	99914532	100638465	723.933	453	mQTL	chr7:99955544:C:G	rs2525548	ENSG00000199667	Y_RNA	cg11013060	Retina	2.3629e-09	0.000315	-0.331739	0.0521991	0.01678	-0.060442	SAME	0.0208295	0.0103358	chr7:99955544	TRUE	FALSE
AMD EUR	chr7:100393925:C:T	chr7:100393925:C:T	T	C	rs7803454	0.122218	0.122218	4.8e-09	99914532	100638465	723.933	453	mQTL	chr7:99955544:C:G	rs2525548	ENSG00000199668	Y_RNA	cg11013060	Retina	2.3629e-09	0.000315	-0.331739	0.0521991	0.01678	-0.060442	SAME	0.0208295	0.0103358	chr7:99955544	TRUE	FALSE
AMD EUR	chr7:100393925:C:T	chr7:100393925:C:T	T	C	rs7803454	0.122218	0.122218	4.8e-09	99914532	100638465	723.933	453	mQTL	chr7:99955544:C:G	rs2525548	ENSG00000199676	Y_RNA	cg11013060	Retina	2.3629e-09	0.000315	-0.331739	0.0521991	0.01678	-0.060442	SAME	0.0208295	0.0103358	chr7:99955544	TRUE	FALSE
AMD EUR	chr7:100393925:C:T	chr7:100393925:C:T	T	C	rs7803454	0.122218	0.122218	4.8e-09	99914532	100638465	723.933	453	mQTL	chr7:99955544:C:G	rs2525548	ENSG00000199677	Y_RNA	cg11013060	Retina	2.3629e-09	0.000315	-0.331739	0.0521991	0.01678	-0.060442	SAME	0.0208295	0.0103358	chr7:99955544	TRUE	FALSE
AMD EUR	chr7:100393925:C:T	chr7:100393925:C:T	T	C	rs7803454	0.122218	0.122218	4.8e-09	99914532	100638465	723.933	453	mQTL	chr7:99955544:C:G	rs2525548	ENSG00000199698	Y_RNA	cg11013060	Retina	2.3629e-09	0.000315	-0.331739	0.0521991	0.01678	-0.060442	SAME	0.0208295	0.0103358	chr7:99955544	TRUE	FALSE
AMD EUR	chr7:100393925:C:T	chr7:100393925:C:T	T	C	rs7803454	0.122218	0.122218	4.8e-09	99914532	100638465	723.933	453	mQTL	chr7:99955544:C:G	rs2525548	ENSG00000199701	Y_RNA	cg11013060	Retina	2.3629e-09	0.000315	-0.331739	0.0521991	0.01678	-0.060442	SAME	0.0208295	0.0103358	chr7:99955544	TRUE	FALSE
AMD EUR	chr7:100393925:C:T	chr7:100393925:C:T	T	C	rs7803454	0.122218	0.122218	4.8e-09	99914532	100638465	723.933	453	mQTL	chr7:99955544:C:G	rs2525548	ENSG00000199705	Y_RNA	cg11013060	Retina	2.3629e-09	0.000315	-0.331739	0.0521991	0.01678	-0.060442	SAME	0.0208295	0.0103358	chr7:99955544	TRUE	FALSE
AMD EUR	chr7:100393925:C:T	chr7:100393925:C:T	T	C	rs7803454	0.122218	0.122218	4.8e-09	99914532	100638465	723.933	453	mQTL	chr7:99955544:C:G	rs2525548	ENSG00000199710	Y_RNA	cg11013060	Retina	2.3629e-09	0.000315	-0.331739	0.0521991	0.01678	-0.060442	SAME	0.0208295	0.0103358	chr7:99955544	TRUE	FALSE
AMD EUR	chr7:100393925:C:T	chr7:100393925:C:T	T	C	rs7803454	0.122218	0.122218	4.8e-09	99914532	100638465	723.933	453	mQTL	chr7:99955544:C:G	rs2525548	ENSG00000199711	Y_RNA	cg11013060	Retina	2.3629e-09	0.000315	-0.331739	0.0521991	0.01678	-0.060442	SAME	0.0208295	0.0103358	chr7:99955544	TRUE	FALSE
AMD EUR	chr7:100393925:C:T	chr7:100393925:C:T	T	C	rs7803454	0.122218	0.122218	4.8e-09	99914532	100638465	723.933	453	mQTL	chr7:99955544:C:G	rs2525548	ENSG00000199715	Y_RNA	cg11013060	Retina	2.3629e-09	0.000315	-0.331739	0.0521991	0.01678	-0.060442	SAME	0.0208295	0.0103358	chr7:99955544	TRUE	FALSE
AMD EUR	chr7:100393925:C:T	chr7:100393925:C:T	T	C	rs7803454	0.122218	0.122218	4.8e-09	99914532	100638465	723.933	453	mQTL	chr7:99955544:C:G	rs2525548	ENSG00000199716	Y_RNA	cg11013060	Retina	2.3629e-09	0.000315	-0.331739	0.0521991	0.01678	-0.060442	SAME	0.0208295	0.0103358	chr7:99955544	TRUE	FALSE
AMD EUR	chr7:100393925:C:T	chr7:100393925:C:T	T	C	rs7803454	0.122218	0.122218	4.8e-09	99914532	100638465	723.933	453	mQTL	chr7:99955544:C:G	rs2525548	ENSG00000199732	Y_RNA	cg11013060	Retina	2.3629e-09	0.000315	-0.331739	0.0521991	0.01678	-0.060442	SAME	0.0208295	0.0103358	chr7:99955544	TRUE	FALSE
AMD EUR	chr7:100393925:C:T	chr7:100393925:C:T	T	C	rs7803454	0.122218	0.122218	4.8e-09	99914532	100638465	723.933	453	mQTL	chr7:99955544:C:G	rs2525548	ENSG00000199740	Y_RNA	cg11013060	Retina	2.3629e-09	0.000315	-0.331739	0.0521991	0.01678	-0.060442	SAME	0.0208295	0.0103358	chr7:99955544	TRUE	FALSE
AMD EUR	chr7:100393925:C:T	chr7:100393925:C:T	T	C	rs7803454	0.122218	0.122218	4.8e-09	99914532	100638465	723.933	453	mQTL	chr7:99955544:C:G	rs2525548	ENSG00000199751	Y_RNA	cg11013060	Retina	2.3629e-09	0.000315	-0.331739	0.0521991	0.01678	-0.060442	SAME	0.0208295	0.0103358	chr7:99955544	TRUE	FALSE
AMD EUR	chr7:100393925:C:T	chr7:100393925:C:T	T	C	rs7803454	0.122218	0.122218	4.8e-09	99914532	100638465	723.933	453	mQTL	chr7:99955544:C:G	rs2525548	ENSG00000199755	Y_RNA	cg11013060	Retina	2.3629e-09	0.000315	-0.331739	0.0521991	0.01678	-0.060442	SAME	0.0208295	0.0103358	chr7:99955544	TRUE	FALSE
AMD EUR	chr7:100393925:C:T	chr7:100393925:C:T	T	C	rs7803454	0.122218	0.122218	4.8e-09	99914532	100638465	723.933	453	mQTL	chr7:99955544:C:G	rs2525548	ENSG00000199756	Y_RNA	cg11013060	Retina	2.3629e-09	0.000315	-0.331739	0.0521991	0.01678	-0.060442	SAME	0.0208295	0.0103358	chr7:99955544	TRUE	FALSE
AMD EUR	chr7:100393925:C:T	chr7:100393925:C:T	T	C	rs7803454	0.122218	0.122218	4.8e-09	99914532	100638465	723.933	453	mQTL	chr7:99955544:C:G	rs2525548	ENSG00000199762	Y_RNA	cg11013060	Retina	2.3629e-09	0.000315	-0.331739	0.0521991	0.01678	-0.060442	SAME	0.0208295	0.0103358	chr7:99955544	TRUE	FALSE
AMD EUR	chr7:100393925:C:T	chr7:100393925:C:T	T	C	rs7803454	0.122218	0.122218	4.8e-09	99914532	100638465	723.933	453	mQTL	chr7:99955544:C:G	rs2525548	ENSG00000199764	Y_RNA	cg11013060	Retina	2.3629e-09	0.000315	-0.331739	0.0521991	0.01678	-0.060442	SAME	0.0208295	0.0103358	chr7:99955544	TRUE	FALSE
AMD EUR	chr7:100393925:C:T	chr7:100393925:C:T	T	C	rs7803454	0.122218	0.122218	4.8e-09	99914532	100638465	723.933	453	mQTL	chr7:99955544:C:G	rs2525548	ENSG00000199780	Y_RNA	cg11013060	Retina	2.3629e-09	0.000315	-0.331739	0.0521991	0.01678	-0.060442	SAME	0.0208295	0.0103358	chr7:99955544	TRUE	FALSE
AMD EUR	chr7:100393925:C:T	chr7:100393925:C:T	T	C	rs7803454	0.122218	0.122218	4.8e-09	99914532	100638465	723.933	453	mQTL	chr7:99955544:C:G	rs2525548	ENSG00000199781	Y_RNA	cg11013060	Retina	2.3629e-09	0.000315	-0.331739	0.0521991	0.01678	-0.060442	SAME	0.0208295	0.0103358	chr7:99955544	TRUE	FALSE
AMD EUR	chr7:100393925:C:T	chr7:100393925:C:T	T	C	rs7803454	0.122218	0.122218	4.8e-09	99914532	100638465	723.933	453	mQTL	chr7:99955544:C:G	rs2525548	ENSG00000199797	Y_RNA	cg11013060	Retina	2.3629e-09	0.000315	-0.331739	0.0521991	0.01678	-0.060442	SAME	0.0208295	0.0103358	chr7:99955544	TRUE	FALSE
AMD EUR	chr7:100393925:C:T	chr7:100393925:C:T	T	C	rs7803454	0.122218	0.122218	4.8e-09	99914532	100638465	723.933	453	mQTL	chr7:99955544:C:G	rs2525548	ENSG00000199801	Y_RNA	cg11013060	Retina	2.3629e-09	0.000315	-0.331739	0.0521991	0.01678	-0.060442	SAME	0.0208295	0.0103358	chr7:99955544	TRUE	FALSE
AMD EUR	chr7:100393925:C:T	chr7:100393925:C:T	T	C	rs7803454	0.122218	0.122218	4.8e-09	99914532	100638465	723.933	453	mQTL	chr7:99955544:C:G	rs2525548	ENSG00000199832	Y_RNA	cg11013060	Retina	2.3629e-09	0.000315	-0.331739	0.0521991	0.01678	-0.060442	SAME	0.0208295	0.0103358	chr7:99955544	TRUE	FALSE
AMD EUR	chr7:100393925:C:T	chr7:100393925:C:T	T	C	rs7803454	0.122218	0.122218	4.8e-09	99914532	100638465	723.933	453	mQTL	chr7:99955544:C:G	rs2525548	ENSG00000199840	Y_RNA	cg11013060	Retina	2.3629e-09	0.000315	-0.331739	0.0521991	0.01678	-0.060442	SAME	0.0208295	0.0103358	chr7:99955544	TRUE	FALSE
AMD EUR	chr7:100393925:C:T	chr7:100393925:C:T	T	C	rs7803454	0.122218	0.122218	4.8e-09	99914532	100638465	723.933	453	mQTL	chr7:99955544:C:G	rs2525548	ENSG00000199862	Y_RNA	cg11013060	Retina	2.3629e-09	0.000315	-0.331739	0.0521991	0.01678	-0.060442	SAME	0.0208295	0.0103358	chr7:99955544	TRUE	FALSE
AMD EUR	chr7:100393925:C:T	chr7:100393925:C:T	T	C	rs7803454	0.122218	0.122218	4.8e-09	99914532	100638465	723.933	453	mQTL	chr7:99955544:C:G	rs2525548	ENSG00000199866	Y_RNA	cg11013060	Retina	2.3629e-09	0.000315	-0.331739	0.0521991	0.01678	-0.060442	SAME	0.0208295	0.0103358	chr7:99955544	TRUE	FALSE
AMD EUR	chr7:100393925:C:T	chr7:100393925:C:T	T	C	rs7803454	0.122218	0.122218	4.8e-09	99914532	100638465	723.933	453	mQTL	chr7:99955544:C:G	rs2525548	ENSG00000199867	Y_RNA	cg11013060	Retina	2.3629e-09	0.000315	-0.331739	0.0521991	0.01678	-0.060442	SAME	0.0208295	0.0103358	chr7:99955544	TRUE	FALSE
AMD EUR	chr7:100393925:C:T	chr7:100393925:C:T	T	C	rs7803454	0.122218	0.122218	4.8e-09	99914532	100638465	723.933	453	mQTL	chr7:99955544:C:G	rs2525548	ENSG00000199870	Y_RNA	cg11013060	Retina	2.3629e-09	0.000315	-0.331739	0.0521991	0.01678	-0.060442	SAME	0.0208295	0.0103358	chr7:99955544	TRUE	FALSE
AMD EUR	chr7:100393925:C:T	chr7:100393925:C:T	T	C	rs7803454	0.122218	0.122218	4.8e-09	99914532	100638465	723.933	453	mQTL	chr7:99955544:C:G	rs2525548	ENSG00000199875	Y_RNA	cg11013060	Retina	2.3629e-09	0.000315	-0.331739	0.0521991	0.01678	-0.060442	SAME	0.0208295	0.0103358	chr7:99955544	TRUE	FALSE
AMD EUR	chr7:100393925:C:T	chr7:100393925:C:T	T	C	rs7803454	0.122218	0.122218	4.8e-09	99914532	100638465	723.933	453	mQTL	chr7:99955544:C:G	rs2525548	ENSG00000199881	Y_RNA	cg11013060	Retina	2.3629e-09	0.000315	-0.331739	0.0521991	0.01678	-0.060442	SAME	0.0208295	0.0103358	chr7:99955544	TRUE	FALSE
AMD EUR	chr7:100393925:C:T	chr7:100393925:C:T	T	C	rs7803454	0.122218	0.122218	4.8e-09	99914532	100638465	723.933	453	mQTL	chr7:99955544:C:G	rs2525548	ENSG00000199884	Y_RNA	cg11013060	Retina	2.3629e-09	0.000315	-0.331739	0.0521991	0.01678	-0.060442	SAME	0.0208295	0.0103358	chr7:99955544	TRUE	FALSE
AMD EUR	chr7:100393925:C:T	chr7:100393925:C:T	T	C	rs7803454	0.122218	0.122218	4.8e-09	99914532	100638465	723.933	453	mQTL	chr7:99955544:C:G	rs2525548	ENSG00000199890	Y_RNA	cg11013060	Retina	2.3629e-09	0.000315	-0.331739	0.0521991	0.01678	-0.060442	SAME	0.0208295	0.0103358	chr7:99955544	TRUE	FALSE
AMD EUR	chr7:100393925:C:T	chr7:100393925:C:T	T	C	rs7803454	0.122218	0.122218	4.8e-09	99914532	100638465	723.933	453	mQTL	chr7:99955544:C:G	rs2525548	ENSG00000199895	Y_RNA	cg11013060	Retina	2.3629e-09	0.000315	-0.331739	0.0521991	0.01678	-0.060442	SAME	0.0208295	0.0103358	chr7:99955544	TRUE	FALSE
AMD EUR	chr7:100393925:C:T	chr7:100393925:C:T	T	C	rs7803454	0.122218	0.122218	4.8e-09	99914532	100638465	723.933	453	mQTL	chr7:99955544:C:G	rs2525548	ENSG00000199899	Y_RNA	cg11013060	Retina	2.3629e-09	0.000315	-0.331739	0.0521991	0.01678	-0.060442	SAME	0.0208295	0.0103358	chr7:99955544	TRUE	FALSE
AMD EUR	chr7:100393925:C:T	chr7:100393925:C:T	T	C	rs7803454	0.122218	0.122218	4.8e-09	99914532	100638465	723.933	453	mQTL	chr7:99955544:C:G	rs2525548	ENSG00000199901	Y_RNA	cg11013060	Retina	2.3629e-09	0.000315	-0.331739	0.0521991	0.01678	-0.060442	SAME	0.0208295	0.0103358	chr7:99955544	TRUE	FALSE
AMD EUR	chr7:100393925:C:T	chr7:100393925:C:T	T	C	rs7803454	0.122218	0.122218	4.8e-09	99914532	100638465	723.933	453	mQTL	chr7:99955544:C:G	rs2525548	ENSG00000199911	Y_RNA	cg11013060	Retina	2.3629e-09	0.000315	-0.331739	0.0521991	0.01678	-0.060442	SAME	0.0208295	0.0103358	chr7:99955544	TRUE	FALSE
AMD EUR	chr7:100393925:C:T	chr7:100393925:C:T	T	C	rs7803454	0.122218	0.122218	4.8e-09	99914532	100638465	723.933	453	mQTL	chr7:99955544:C:G	rs2525548	ENSG00000199912	Y_RNA	cg11013060	Retina	2.3629e-09	0.000315	-0.331739	0.0521991	0.01678	-0.060442	SAME	0.0208295	0.0103358	chr7:99955544	TRUE	FALSE
AMD EUR	chr7:100393925:C:T	chr7:100393925:C:T	T	C	rs7803454	0.122218	0.122218	4.8e-09	99914532	100638465	723.933	453	mQTL	chr7:99955544:C:G	rs2525548	ENSG00000199913	Y_RNA	cg11013060	Retina	2.3629e-09	0.000315	-0.331739	0.0521991	0.01678	-0.060442	SAME	0.0208295	0.0103358	chr7:99955544	TRUE	FALSE
AMD EUR	chr7:100393925:C:T	chr7:100393925:C:T	T	C	rs7803454	0.122218	0.122218	4.8e-09	99914532	100638465	723.933	453	mQTL	chr7:99955544:C:G	rs2525548	ENSG00000199936	Y_RNA	cg11013060	Retina	2.3629e-09	0.000315	-0.331739	0.0521991	0.01678	-0.060442	SAME	0.0208295	0.0103358	chr7:99955544	TRUE	FALSE
AMD EUR	chr7:100393925:C:T	chr7:100393925:C:T	T	C	rs7803454	0.122218	0.122218	4.8e-09	99914532	100638465	723.933	453	mQTL	chr7:99955544:C:G	rs2525548	ENSG00000199938	Y_RNA	cg11013060	Retina	2.3629e-09	0.000315	-0.331739	0.0521991	0.01678	-0.060442	SAME	0.0208295	0.0103358	chr7:99955544	TRUE	FALSE
AMD EUR	chr7:100393925:C:T	chr7:100393925:C:T	T	C	rs7803454	0.122218	0.122218	4.8e-09	99914532	100638465	723.933	453	mQTL	chr7:99955544:C:G	rs2525548	ENSG00000199949	Y_RNA	cg11013060	Retina	2.3629e-09	0.000315	-0.331739	0.0521991	0.01678	-0.060442	SAME	0.0208295	0.0103358	chr7:99955544	TRUE	FALSE
AMD EUR	chr7:100393925:C:T	chr7:100393925:C:T	T	C	rs7803454	0.122218	0.122218	4.8e-09	99914532	100638465	723.933	453	mQTL	chr7:99955544:C:G	rs2525548	ENSG00000199962	Y_RNA	cg11013060	Retina	2.3629e-09	0.000315	-0.331739	0.0521991	0.01678	-0.060442	SAME	0.0208295	0.0103358	chr7:99955544	TRUE	FALSE
AMD EUR	chr7:100393925:C:T	chr7:100393925:C:T	T	C	rs7803454	0.122218	0.122218	4.8e-09	99914532	100638465	723.933	453	mQTL	chr7:99955544:C:G	rs2525548	ENSG00000199964	Y_RNA	cg11013060	Retina	2.3629e-09	0.000315	-0.331739	0.0521991	0.01678	-0.060442	SAME	0.0208295	0.0103358	chr7:99955544	TRUE	FALSE
AMD EUR	chr7:100393925:C:T	chr7:100393925:C:T	T	C	rs7803454	0.122218	0.122218	4.8e-09	99914532	100638465	723.933	453	mQTL	chr7:99955544:C:G	rs2525548	ENSG00000199979	Y_RNA	cg11013060	Retina	2.3629e-09	0.000315	-0.331739	0.0521991	0.01678	-0.060442	SAME	0.0208295	0.0103358	chr7:99955544	TRUE	FALSE
AMD EUR	chr7:100393925:C:T	chr7:100393925:C:T	T	C	rs7803454	0.122218	0.122218	4.8e-09	99914532	100638465	723.933	453	mQTL	chr7:99955544:C:G	rs2525548	ENSG00000200008	Y_RNA	cg11013060	Retina	2.3629e-09	0.000315	-0.331739	0.0521991	0.01678	-0.060442	SAME	0.0208295	0.0103358	chr7:99955544	TRUE	FALSE
AMD EUR	chr7:100393925:C:T	chr7:100393925:C:T	T	C	rs7803454	0.122218	0.122218	4.8e-09	99914532	100638465	723.933	453	mQTL	chr7:99955544:C:G	rs2525548	ENSG00000200011	Y_RNA	cg11013060	Retina	2.3629e-09	0.000315	-0.331739	0.0521991	0.01678	-0.060442	SAME	0.0208295	0.0103358	chr7:99955544	TRUE	FALSE
AMD EUR	chr7:100393925:C:T	chr7:100393925:C:T	T	C	rs7803454	0.122218	0.122218	4.8e-09	99914532	100638465	723.933	453	mQTL	chr7:99955544:C:G	rs2525548	ENSG00000200024	Y_RNA	cg11013060	Retina	2.3629e-09	0.000315	-0.331739	0.0521991	0.01678	-0.060442	SAME	0.0208295	0.0103358	chr7:99955544	TRUE	FALSE
AMD EUR	chr7:100393925:C:T	chr7:100393925:C:T	T	C	rs7803454	0.122218	0.122218	4.8e-09	99914532	100638465	723.933	453	mQTL	chr7:99955544:C:G	rs2525548	ENSG00000200040	Y_RNA	cg11013060	Retina	2.3629e-09	0.000315	-0.331739	0.0521991	0.01678	-0.060442	SAME	0.0208295	0.0103358	chr7:99955544	TRUE	FALSE
AMD EUR	chr7:100393925:C:T	chr7:100393925:C:T	T	C	rs7803454	0.122218	0.122218	4.8e-09	99914532	100638465	723.933	453	mQTL	chr7:99955544:C:G	rs2525548	ENSG00000200041	Y_RNA	cg11013060	Retina	2.3629e-09	0.000315	-0.331739	0.0521991	0.01678	-0.060442	SAME	0.0208295	0.0103358	chr7:99955544	TRUE	FALSE
AMD EUR	chr7:100393925:C:T	chr7:100393925:C:T	T	C	rs7803454	0.122218	0.122218	4.8e-09	99914532	100638465	723.933	453	mQTL	chr7:99955544:C:G	rs2525548	ENSG00000200049	Y_RNA	cg11013060	Retina	2.3629e-09	0.000315	-0.331739	0.0521991	0.01678	-0.060442	SAME	0.0208295	0.0103358	chr7:99955544	TRUE	FALSE
AMD EUR	chr7:100393925:C:T	chr7:100393925:C:T	T	C	rs7803454	0.122218	0.122218	4.8e-09	99914532	100638465	723.933	453	mQTL	chr7:99955544:C:G	rs2525548	ENSG00000200052	Y_RNA	cg11013060	Retina	2.3629e-09	0.000315	-0.331739	0.0521991	0.01678	-0.060442	SAME	0.0208295	0.0103358	chr7:99955544	TRUE	FALSE
AMD EUR	chr7:100393925:C:T	chr7:100393925:C:T	T	C	rs7803454	0.122218	0.122218	4.8e-09	99914532	100638465	723.933	453	mQTL	chr7:99955544:C:G	rs2525548	ENSG00000200059	Y_RNA	cg11013060	Retina	2.3629e-09	0.000315	-0.331739	0.0521991	0.01678	-0.060442	SAME	0.0208295	0.0103358	chr7:99955544	TRUE	FALSE
AMD EUR	chr7:100393925:C:T	chr7:100393925:C:T	T	C	rs7803454	0.122218	0.122218	4.8e-09	99914532	100638465	723.933	453	mQTL	chr7:99955544:C:G	rs2525548	ENSG00000200060	Y_RNA	cg11013060	Retina	2.3629e-09	0.000315	-0.331739	0.0521991	0.01678	-0.060442	SAME	0.0208295	0.0103358	chr7:99955544	TRUE	FALSE
AMD EUR	chr7:100393925:C:T	chr7:100393925:C:T	T	C	rs7803454	0.122218	0.122218	4.8e-09	99914532	100638465	723.933	453	mQTL	chr7:99955544:C:G	rs2525548	ENSG00000200065	Y_RNA	cg11013060	Retina	2.3629e-09	0.000315	-0.331739	0.0521991	0.01678	-0.060442	SAME	0.0208295	0.0103358	chr7:99955544	TRUE	FALSE
AMD EUR	chr7:100393925:C:T	chr7:100393925:C:T	T	C	rs7803454	0.122218	0.122218	4.8e-09	99914532	100638465	723.933	453	mQTL	chr7:99955544:C:G	rs2525548	ENSG00000200085	Y_RNA	cg11013060	Retina	2.3629e-09	0.000315	-0.331739	0.0521991	0.01678	-0.060442	SAME	0.0208295	0.0103358	chr7:99955544	TRUE	FALSE
AMD EUR	chr7:100393925:C:T	chr7:100393925:C:T	T	C	rs7803454	0.122218	0.122218	4.8e-09	99914532	100638465	723.933	453	mQTL	chr7:99955544:C:G	rs2525548	ENSG00000200090	Y_RNA	cg11013060	Retina	2.3629e-09	0.000315	-0.331739	0.0521991	0.01678	-0.060442	SAME	0.0208295	0.0103358	chr7:99955544	TRUE	FALSE
AMD EUR	chr7:100393925:C:T	chr7:100393925:C:T	T	C	rs7803454	0.122218	0.122218	4.8e-09	99914532	100638465	723.933	453	mQTL	chr7:99955544:C:G	rs2525548	ENSG00000200118	Y_RNA	cg11013060	Retina	2.3629e-09	0.000315	-0.331739	0.0521991	0.01678	-0.060442	SAME	0.0208295	0.0103358	chr7:99955544	TRUE	FALSE
AMD EUR	chr7:100393925:C:T	chr7:100393925:C:T	T	C	rs7803454	0.122218	0.122218	4.8e-09	99914532	100638465	723.933	453	mQTL	chr7:99955544:C:G	rs2525548	ENSG00000200120	Y_RNA	cg11013060	Retina	2.3629e-09	0.000315	-0.331739	0.0521991	0.01678	-0.060442	SAME	0.0208295	0.0103358	chr7:99955544	TRUE	FALSE
AMD EUR	chr7:100393925:C:T	chr7:100393925:C:T	T	C	rs7803454	0.122218	0.122218	4.8e-09	99914532	100638465	723.933	453	mQTL	chr7:99955544:C:G	rs2525548	ENSG00000200121	Y_RNA	cg11013060	Retina	2.3629e-09	0.000315	-0.331739	0.0521991	0.01678	-0.060442	SAME	0.0208295	0.0103358	chr7:99955544	TRUE	FALSE
AMD EUR	chr7:100393925:C:T	chr7:100393925:C:T	T	C	rs7803454	0.122218	0.122218	4.8e-09	99914532	100638465	723.933	453	mQTL	chr7:99955544:C:G	rs2525548	ENSG00000200135	Y_RNA	cg11013060	Retina	2.3629e-09	0.000315	-0.331739	0.0521991	0.01678	-0.060442	SAME	0.0208295	0.0103358	chr7:99955544	TRUE	FALSE
AMD EUR	chr7:100393925:C:T	chr7:100393925:C:T	T	C	rs7803454	0.122218	0.122218	4.8e-09	99914532	100638465	723.933	453	mQTL	chr7:99955544:C:G	rs2525548	ENSG00000200142	Y_RNA	cg11013060	Retina	2.3629e-09	0.000315	-0.331739	0.0521991	0.01678	-0.060442	SAME	0.0208295	0.0103358	chr7:99955544	TRUE	FALSE
AMD EUR	chr7:100393925:C:T	chr7:100393925:C:T	T	C	rs7803454	0.122218	0.122218	4.8e-09	99914532	100638465	723.933	453	mQTL	chr7:99955544:C:G	rs2525548	ENSG00000200162	Y_RNA	cg11013060	Retina	2.3629e-09	0.000315	-0.331739	0.0521991	0.01678	-0.060442	SAME	0.0208295	0.0103358	chr7:99955544	TRUE	FALSE
AMD EUR	chr7:100393925:C:T	chr7:100393925:C:T	T	C	rs7803454	0.122218	0.122218	4.8e-09	99914532	100638465	723.933	453	mQTL	chr7:99955544:C:G	rs2525548	ENSG00000200164	Y_RNA	cg11013060	Retina	2.3629e-09	0.000315	-0.331739	0.0521991	0.01678	-0.060442	SAME	0.0208295	0.0103358	chr7:99955544	TRUE	FALSE
AMD EUR	chr7:100393925:C:T	chr7:100393925:C:T	T	C	rs7803454	0.122218	0.122218	4.8e-09	99914532	100638465	723.933	453	mQTL	chr7:99955544:C:G	rs2525548	ENSG00000200170	Y_RNA	cg11013060	Retina	2.3629e-09	0.000315	-0.331739	0.0521991	0.01678	-0.060442	SAME	0.0208295	0.0103358	chr7:99955544	TRUE	FALSE
AMD EUR	chr7:100393925:C:T	chr7:100393925:C:T	T	C	rs7803454	0.122218	0.122218	4.8e-09	99914532	100638465	723.933	453	mQTL	chr7:99955544:C:G	rs2525548	ENSG00000200171	Y_RNA	cg11013060	Retina	2.3629e-09	0.000315	-0.331739	0.0521991	0.01678	-0.060442	SAME	0.0208295	0.0103358	chr7:99955544	TRUE	FALSE
AMD EUR	chr7:100393925:C:T	chr7:100393925:C:T	T	C	rs7803454	0.122218	0.122218	4.8e-09	99914532	100638465	723.933	453	mQTL	chr7:99955544:C:G	rs2525548	ENSG00000200174	Y_RNA	cg11013060	Retina	2.3629e-09	0.000315	-0.331739	0.0521991	0.01678	-0.060442	SAME	0.0208295	0.0103358	chr7:99955544	TRUE	FALSE
AMD EUR	chr7:100393925:C:T	chr7:100393925:C:T	T	C	rs7803454	0.122218	0.122218	4.8e-09	99914532	100638465	723.933	453	mQTL	chr7:99955544:C:G	rs2525548	ENSG00000200179	Y_RNA	cg11013060	Retina	2.3629e-09	0.000315	-0.331739	0.0521991	0.01678	-0.060442	SAME	0.0208295	0.0103358	chr7:99955544	TRUE	FALSE
AMD EUR	chr7:100393925:C:T	chr7:100393925:C:T	T	C	rs7803454	0.122218	0.122218	4.8e-09	99914532	100638465	723.933	453	mQTL	chr7:99955544:C:G	rs2525548	ENSG00000200201	Y_RNA	cg11013060	Retina	2.3629e-09	0.000315	-0.331739	0.0521991	0.01678	-0.060442	SAME	0.0208295	0.0103358	chr7:99955544	TRUE	FALSE
AMD EUR	chr7:100393925:C:T	chr7:100393925:C:T	T	C	rs7803454	0.122218	0.122218	4.8e-09	99914532	100638465	723.933	453	mQTL	chr7:99955544:C:G	rs2525548	ENSG00000200208	Y_RNA	cg11013060	Retina	2.3629e-09	0.000315	-0.331739	0.0521991	0.01678	-0.060442	SAME	0.0208295	0.0103358	chr7:99955544	TRUE	FALSE
AMD EUR	chr7:100393925:C:T	chr7:100393925:C:T	T	C	rs7803454	0.122218	0.122218	4.8e-09	99914532	100638465	723.933	453	mQTL	chr7:99955544:C:G	rs2525548	ENSG00000200209	Y_RNA	cg11013060	Retina	2.3629e-09	0.000315	-0.331739	0.0521991	0.01678	-0.060442	SAME	0.0208295	0.0103358	chr7:99955544	TRUE	FALSE
AMD EUR	chr7:100393925:C:T	chr7:100393925:C:T	T	C	rs7803454	0.122218	0.122218	4.8e-09	99914532	100638465	723.933	453	mQTL	chr7:99955544:C:G	rs2525548	ENSG00000200241	Y_RNA	cg11013060	Retina	2.3629e-09	0.000315	-0.331739	0.0521991	0.01678	-0.060442	SAME	0.0208295	0.0103358	chr7:99955544	TRUE	FALSE
AMD EUR	chr7:100393925:C:T	chr7:100393925:C:T	T	C	rs7803454	0.122218	0.122218	4.8e-09	99914532	100638465	723.933	453	mQTL	chr7:99955544:C:G	rs2525548	ENSG00000200252	Y_RNA	cg11013060	Retina	2.3629e-09	0.000315	-0.331739	0.0521991	0.01678	-0.060442	SAME	0.0208295	0.0103358	chr7:99955544	TRUE	FALSE
AMD EUR	chr7:100393925:C:T	chr7:100393925:C:T	T	C	rs7803454	0.122218	0.122218	4.8e-09	99914532	100638465	723.933	453	mQTL	chr7:99955544:C:G	rs2525548	ENSG00000200256	Y_RNA	cg11013060	Retina	2.3629e-09	0.000315	-0.331739	0.0521991	0.01678	-0.060442	SAME	0.0208295	0.0103358	chr7:99955544	TRUE	FALSE
AMD EUR	chr7:100393925:C:T	chr7:100393925:C:T	T	C	rs7803454	0.122218	0.122218	4.8e-09	99914532	100638465	723.933	453	mQTL	chr7:99955544:C:G	rs2525548	ENSG00000200261	Y_RNA	cg11013060	Retina	2.3629e-09	0.000315	-0.331739	0.0521991	0.01678	-0.060442	SAME	0.0208295	0.0103358	chr7:99955544	TRUE	FALSE
AMD EUR	chr7:100393925:C:T	chr7:100393925:C:T	T	C	rs7803454	0.122218	0.122218	4.8e-09	99914532	100638465	723.933	453	mQTL	chr7:99955544:C:G	rs2525548	ENSG00000200262	Y_RNA	cg11013060	Retina	2.3629e-09	0.000315	-0.331739	0.0521991	0.01678	-0.060442	SAME	0.0208295	0.0103358	chr7:99955544	TRUE	FALSE
AMD EUR	chr7:100393925:C:T	chr7:100393925:C:T	T	C	rs7803454	0.122218	0.122218	4.8e-09	99914532	100638465	723.933	453	mQTL	chr7:99955544:C:G	rs2525548	ENSG00000200283	Y_RNA	cg11013060	Retina	2.3629e-09	0.000315	-0.331739	0.0521991	0.01678	-0.060442	SAME	0.0208295	0.0103358	chr7:99955544	TRUE	FALSE
AMD EUR	chr7:100393925:C:T	chr7:100393925:C:T	T	C	rs7803454	0.122218	0.122218	4.8e-09	99914532	100638465	723.933	453	mQTL	chr7:99955544:C:G	rs2525548	ENSG00000200287	Y_RNA	cg11013060	Retina	2.3629e-09	0.000315	-0.331739	0.0521991	0.01678	-0.060442	SAME	0.0208295	0.0103358	chr7:99955544	TRUE	FALSE
AMD EUR	chr7:100393925:C:T	chr7:100393925:C:T	T	C	rs7803454	0.122218	0.122218	4.8e-09	99914532	100638465	723.933	453	mQTL	chr7:99955544:C:G	rs2525548	ENSG00000200291	Y_RNA	cg11013060	Retina	2.3629e-09	0.000315	-0.331739	0.0521991	0.01678	-0.060442	SAME	0.0208295	0.0103358	chr7:99955544	TRUE	FALSE
AMD EUR	chr7:100393925:C:T	chr7:100393925:C:T	T	C	rs7803454	0.122218	0.122218	4.8e-09	99914532	100638465	723.933	453	mQTL	chr7:99955544:C:G	rs2525548	ENSG00000200298	Y_RNA	cg11013060	Retina	2.3629e-09	0.000315	-0.331739	0.0521991	0.01678	-0.060442	SAME	0.0208295	0.0103358	chr7:99955544	TRUE	FALSE
AMD EUR	chr7:100393925:C:T	chr7:100393925:C:T	T	C	rs7803454	0.122218	0.122218	4.8e-09	99914532	100638465	723.933	453	mQTL	chr7:99955544:C:G	rs2525548	ENSG00000200305	Y_RNA	cg11013060	Retina	2.3629e-09	0.000315	-0.331739	0.0521991	0.01678	-0.060442	SAME	0.0208295	0.0103358	chr7:99955544	TRUE	FALSE
AMD EUR	chr7:100393925:C:T	chr7:100393925:C:T	T	C	rs7803454	0.122218	0.122218	4.8e-09	99914532	100638465	723.933	453	mQTL	chr7:99955544:C:G	rs2525548	ENSG00000200309	Y_RNA	cg11013060	Retina	2.3629e-09	0.000315	-0.331739	0.0521991	0.01678	-0.060442	SAME	0.0208295	0.0103358	chr7:99955544	TRUE	FALSE
AMD EUR	chr7:100393925:C:T	chr7:100393925:C:T	T	C	rs7803454	0.122218	0.122218	4.8e-09	99914532	100638465	723.933	453	mQTL	chr7:99955544:C:G	rs2525548	ENSG00000200314	Y_RNA	cg11013060	Retina	2.3629e-09	0.000315	-0.331739	0.0521991	0.01678	-0.060442	SAME	0.0208295	0.0103358	chr7:99955544	TRUE	FALSE
AMD EUR	chr7:100393925:C:T	chr7:100393925:C:T	T	C	rs7803454	0.122218	0.122218	4.8e-09	99914532	100638465	723.933	453	mQTL	chr7:99955544:C:G	rs2525548	ENSG00000200325	Y_RNA	cg11013060	Retina	2.3629e-09	0.000315	-0.331739	0.0521991	0.01678	-0.060442	SAME	0.0208295	0.0103358	chr7:99955544	TRUE	FALSE
AMD EUR	chr7:100393925:C:T	chr7:100393925:C:T	T	C	rs7803454	0.122218	0.122218	4.8e-09	99914532	100638465	723.933	453	mQTL	chr7:99955544:C:G	rs2525548	ENSG00000200332	Y_RNA	cg11013060	Retina	2.3629e-09	0.000315	-0.331739	0.0521991	0.01678	-0.060442	SAME	0.0208295	0.0103358	chr7:99955544	TRUE	FALSE
AMD EUR	chr7:100393925:C:T	chr7:100393925:C:T	T	C	rs7803454	0.122218	0.122218	4.8e-09	99914532	100638465	723.933	453	mQTL	chr7:99955544:C:G	rs2525548	ENSG00000200334	Y_RNA	cg11013060	Retina	2.3629e-09	0.000315	-0.331739	0.0521991	0.01678	-0.060442	SAME	0.0208295	0.0103358	chr7:99955544	TRUE	FALSE
AMD EUR	chr7:100393925:C:T	chr7:100393925:C:T	T	C	rs7803454	0.122218	0.122218	4.8e-09	99914532	100638465	723.933	453	mQTL	chr7:99955544:C:G	rs2525548	ENSG00000200344	Y_RNA	cg11013060	Retina	2.3629e-09	0.000315	-0.331739	0.0521991	0.01678	-0.060442	SAME	0.0208295	0.0103358	chr7:99955544	TRUE	FALSE
AMD EUR	chr7:100393925:C:T	chr7:100393925:C:T	T	C	rs7803454	0.122218	0.122218	4.8e-09	99914532	100638465	723.933	453	mQTL	chr7:99955544:C:G	rs2525548	ENSG00000200351	Y_RNA	cg11013060	Retina	2.3629e-09	0.000315	-0.331739	0.0521991	0.01678	-0.060442	SAME	0.0208295	0.0103358	chr7:99955544	TRUE	FALSE
AMD EUR	chr7:100393925:C:T	chr7:100393925:C:T	T	C	rs7803454	0.122218	0.122218	4.8e-09	99914532	100638465	723.933	453	mQTL	chr7:99955544:C:G	rs2525548	ENSG00000200361	Y_RNA	cg11013060	Retina	2.3629e-09	0.000315	-0.331739	0.0521991	0.01678	-0.060442	SAME	0.0208295	0.0103358	chr7:99955544	TRUE	FALSE
AMD EUR	chr7:100393925:C:T	chr7:100393925:C:T	T	C	rs7803454	0.122218	0.122218	4.8e-09	99914532	100638465	723.933	453	mQTL	chr7:99955544:C:G	rs2525548	ENSG00000200390	Y_RNA	cg11013060	Retina	2.3629e-09	0.000315	-0.331739	0.0521991	0.01678	-0.060442	SAME	0.0208295	0.0103358	chr7:99955544	TRUE	FALSE
AMD EUR	chr7:100393925:C:T	chr7:100393925:C:T	T	C	rs7803454	0.122218	0.122218	4.8e-09	99914532	100638465	723.933	453	mQTL	chr7:99955544:C:G	rs2525548	ENSG00000200391	Y_RNA	cg11013060	Retina	2.3629e-09	0.000315	-0.331739	0.0521991	0.01678	-0.060442	SAME	0.0208295	0.0103358	chr7:99955544	TRUE	FALSE
AMD EUR	chr7:100393925:C:T	chr7:100393925:C:T	T	C	rs7803454	0.122218	0.122218	4.8e-09	99914532	100638465	723.933	453	mQTL	chr7:99955544:C:G	rs2525548	ENSG00000200397	Y_RNA	cg11013060	Retina	2.3629e-09	0.000315	-0.331739	0.0521991	0.01678	-0.060442	SAME	0.0208295	0.0103358	chr7:99955544	TRUE	FALSE
AMD EUR	chr7:100393925:C:T	chr7:100393925:C:T	T	C	rs7803454	0.122218	0.122218	4.8e-09	99914532	100638465	723.933	453	mQTL	chr7:99955544:C:G	rs2525548	ENSG00000200419	Y_RNA	cg11013060	Retina	2.3629e-09	0.000315	-0.331739	0.0521991	0.01678	-0.060442	SAME	0.0208295	0.0103358	chr7:99955544	TRUE	FALSE
AMD EUR	chr7:100393925:C:T	chr7:100393925:C:T	T	C	rs7803454	0.122218	0.122218	4.8e-09	99914532	100638465	723.933	453	mQTL	chr7:99955544:C:G	rs2525548	ENSG00000200421	Y_RNA	cg11013060	Retina	2.3629e-09	0.000315	-0.331739	0.0521991	0.01678	-0.060442	SAME	0.0208295	0.0103358	chr7:99955544	TRUE	FALSE
AMD EUR	chr7:100393925:C:T	chr7:100393925:C:T	T	C	rs7803454	0.122218	0.122218	4.8e-09	99914532	100638465	723.933	453	mQTL	chr7:99955544:C:G	rs2525548	ENSG00000200427	Y_RNA	cg11013060	Retina	2.3629e-09	0.000315	-0.331739	0.0521991	0.01678	-0.060442	SAME	0.0208295	0.0103358	chr7:99955544	TRUE	FALSE
AMD EUR	chr7:100393925:C:T	chr7:100393925:C:T	T	C	rs7803454	0.122218	0.122218	4.8e-09	99914532	100638465	723.933	453	mQTL	chr7:99955544:C:G	rs2525548	ENSG00000200428	Y_RNA	cg11013060	Retina	2.3629e-09	0.000315	-0.331739	0.0521991	0.01678	-0.060442	SAME	0.0208295	0.0103358	chr7:99955544	TRUE	FALSE
AMD EUR	chr7:100393925:C:T	chr7:100393925:C:T	T	C	rs7803454	0.122218	0.122218	4.8e-09	99914532	100638465	723.933	453	mQTL	chr7:99955544:C:G	rs2525548	ENSG00000200432	Y_RNA	cg11013060	Retina	2.3629e-09	0.000315	-0.331739	0.0521991	0.01678	-0.060442	SAME	0.0208295	0.0103358	chr7:99955544	TRUE	FALSE
AMD EUR	chr7:100393925:C:T	chr7:100393925:C:T	T	C	rs7803454	0.122218	0.122218	4.8e-09	99914532	100638465	723.933	453	mQTL	chr7:99955544:C:G	rs2525548	ENSG00000200436	Y_RNA	cg11013060	Retina	2.3629e-09	0.000315	-0.331739	0.0521991	0.01678	-0.060442	SAME	0.0208295	0.0103358	chr7:99955544	TRUE	FALSE
AMD EUR	chr7:100393925:C:T	chr7:100393925:C:T	T	C	rs7803454	0.122218	0.122218	4.8e-09	99914532	100638465	723.933	453	mQTL	chr7:99955544:C:G	rs2525548	ENSG00000200448	Y_RNA	cg11013060	Retina	2.3629e-09	0.000315	-0.331739	0.0521991	0.01678	-0.060442	SAME	0.0208295	0.0103358	chr7:99955544	TRUE	FALSE
AMD EUR	chr7:100393925:C:T	chr7:100393925:C:T	T	C	rs7803454	0.122218	0.122218	4.8e-09	99914532	100638465	723.933	453	mQTL	chr7:99955544:C:G	rs2525548	ENSG00000200485	Y_RNA	cg11013060	Retina	2.3629e-09	0.000315	-0.331739	0.0521991	0.01678	-0.060442	SAME	0.0208295	0.0103358	chr7:99955544	TRUE	FALSE
AMD EUR	chr7:100393925:C:T	chr7:100393925:C:T	T	C	rs7803454	0.122218	0.122218	4.8e-09	99914532	100638465	723.933	453	mQTL	chr7:99955544:C:G	rs2525548	ENSG00000200494	Y_RNA	cg11013060	Retina	2.3629e-09	0.000315	-0.331739	0.0521991	0.01678	-0.060442	SAME	0.0208295	0.0103358	chr7:99955544	TRUE	FALSE
AMD EUR	chr7:100393925:C:T	chr7:100393925:C:T	T	C	rs7803454	0.122218	0.122218	4.8e-09	99914532	100638465	723.933	453	mQTL	chr7:99955544:C:G	rs2525548	ENSG00000200502	Y_RNA	cg11013060	Retina	2.3629e-09	0.000315	-0.331739	0.0521991	0.01678	-0.060442	SAME	0.0208295	0.0103358	chr7:99955544	TRUE	FALSE
AMD EUR	chr7:100393925:C:T	chr7:100393925:C:T	T	C	rs7803454	0.122218	0.122218	4.8e-09	99914532	100638465	723.933	453	mQTL	chr7:99955544:C:G	rs2525548	ENSG00000200506	Y_RNA	cg11013060	Retina	2.3629e-09	0.000315	-0.331739	0.0521991	0.01678	-0.060442	SAME	0.0208295	0.0103358	chr7:99955544	TRUE	FALSE
AMD EUR	chr7:100393925:C:T	chr7:100393925:C:T	T	C	rs7803454	0.122218	0.122218	4.8e-09	99914532	100638465	723.933	453	mQTL	chr7:99955544:C:G	rs2525548	ENSG00000200508	Y_RNA	cg11013060	Retina	2.3629e-09	0.000315	-0.331739	0.0521991	0.01678	-0.060442	SAME	0.0208295	0.0103358	chr7:99955544	TRUE	FALSE
AMD EUR	chr7:100393925:C:T	chr7:100393925:C:T	T	C	rs7803454	0.122218	0.122218	4.8e-09	99914532	100638465	723.933	453	mQTL	chr7:99955544:C:G	rs2525548	ENSG00000200521	Y_RNA	cg11013060	Retina	2.3629e-09	0.000315	-0.331739	0.0521991	0.01678	-0.060442	SAME	0.0208295	0.0103358	chr7:99955544	TRUE	FALSE
AMD EUR	chr7:100393925:C:T	chr7:100393925:C:T	T	C	rs7803454	0.122218	0.122218	4.8e-09	99914532	100638465	723.933	453	mQTL	chr7:99955544:C:G	rs2525548	ENSG00000200544	Y_RNA	cg11013060	Retina	2.3629e-09	0.000315	-0.331739	0.0521991	0.01678	-0.060442	SAME	0.0208295	0.0103358	chr7:99955544	TRUE	FALSE
AMD EUR	chr7:100393925:C:T	chr7:100393925:C:T	T	C	rs7803454	0.122218	0.122218	4.8e-09	99914532	100638465	723.933	453	mQTL	chr7:99955544:C:G	rs2525548	ENSG00000200547	Y_RNA	cg11013060	Retina	2.3629e-09	0.000315	-0.331739	0.0521991	0.01678	-0.060442	SAME	0.0208295	0.0103358	chr7:99955544	TRUE	FALSE
AMD EUR	chr7:100393925:C:T	chr7:100393925:C:T	T	C	rs7803454	0.122218	0.122218	4.8e-09	99914532	100638465	723.933	453	mQTL	chr7:99955544:C:G	rs2525548	ENSG00000200552	Y_RNA	cg11013060	Retina	2.3629e-09	0.000315	-0.331739	0.0521991	0.01678	-0.060442	SAME	0.0208295	0.0103358	chr7:99955544	TRUE	FALSE
AMD EUR	chr7:100393925:C:T	chr7:100393925:C:T	T	C	rs7803454	0.122218	0.122218	4.8e-09	99914532	100638465	723.933	453	mQTL	chr7:99955544:C:G	rs2525548	ENSG00000200553	Y_RNA	cg11013060	Retina	2.3629e-09	0.000315	-0.331739	0.0521991	0.01678	-0.060442	SAME	0.0208295	0.0103358	chr7:99955544	TRUE	FALSE
AMD EUR	chr7:100393925:C:T	chr7:100393925:C:T	T	C	rs7803454	0.122218	0.122218	4.8e-09	99914532	100638465	723.933	453	mQTL	chr7:99955544:C:G	rs2525548	ENSG00000200572	Y_RNA	cg11013060	Retina	2.3629e-09	0.000315	-0.331739	0.0521991	0.01678	-0.060442	SAME	0.0208295	0.0103358	chr7:99955544	TRUE	FALSE
AMD EUR	chr7:100393925:C:T	chr7:100393925:C:T	T	C	rs7803454	0.122218	0.122218	4.8e-09	99914532	100638465	723.933	453	mQTL	chr7:99955544:C:G	rs2525548	ENSG00000200579	Y_RNA	cg11013060	Retina	2.3629e-09	0.000315	-0.331739	0.0521991	0.01678	-0.060442	SAME	0.0208295	0.0103358	chr7:99955544	TRUE	FALSE
AMD EUR	chr7:100393925:C:T	chr7:100393925:C:T	T	C	rs7803454	0.122218	0.122218	4.8e-09	99914532	100638465	723.933	453	mQTL	chr7:99955544:C:G	rs2525548	ENSG00000200591	Y_RNA	cg11013060	Retina	2.3629e-09	0.000315	-0.331739	0.0521991	0.01678	-0.060442	SAME	0.0208295	0.0103358	chr7:99955544	TRUE	FALSE
AMD EUR	chr7:100393925:C:T	chr7:100393925:C:T	T	C	rs7803454	0.122218	0.122218	4.8e-09	99914532	100638465	723.933	453	mQTL	chr7:99955544:C:G	rs2525548	ENSG00000200600	Y_RNA	cg11013060	Retina	2.3629e-09	0.000315	-0.331739	0.0521991	0.01678	-0.060442	SAME	0.0208295	0.0103358	chr7:99955544	TRUE	FALSE
AMD EUR	chr7:100393925:C:T	chr7:100393925:C:T	T	C	rs7803454	0.122218	0.122218	4.8e-09	99914532	100638465	723.933	453	mQTL	chr7:99955544:C:G	rs2525548	ENSG00000200605	Y_RNA	cg11013060	Retina	2.3629e-09	0.000315	-0.331739	0.0521991	0.01678	-0.060442	SAME	0.0208295	0.0103358	chr7:99955544	TRUE	FALSE
AMD EUR	chr7:100393925:C:T	chr7:100393925:C:T	T	C	rs7803454	0.122218	0.122218	4.8e-09	99914532	100638465	723.933	453	mQTL	chr7:99955544:C:G	rs2525548	ENSG00000200610	Y_RNA	cg11013060	Retina	2.3629e-09	0.000315	-0.331739	0.0521991	0.01678	-0.060442	SAME	0.0208295	0.0103358	chr7:99955544	TRUE	FALSE
AMD EUR	chr7:100393925:C:T	chr7:100393925:C:T	T	C	rs7803454	0.122218	0.122218	4.8e-09	99914532	100638465	723.933	453	mQTL	chr7:99955544:C:G	rs2525548	ENSG00000200615	Y_RNA	cg11013060	Retina	2.3629e-09	0.000315	-0.331739	0.0521991	0.01678	-0.060442	SAME	0.0208295	0.0103358	chr7:99955544	TRUE	FALSE
AMD EUR	chr7:100393925:C:T	chr7:100393925:C:T	T	C	rs7803454	0.122218	0.122218	4.8e-09	99914532	100638465	723.933	453	mQTL	chr7:99955544:C:G	rs2525548	ENSG00000200616	Y_RNA	cg11013060	Retina	2.3629e-09	0.000315	-0.331739	0.0521991	0.01678	-0.060442	SAME	0.0208295	0.0103358	chr7:99955544	TRUE	FALSE
AMD EUR	chr7:100393925:C:T	chr7:100393925:C:T	T	C	rs7803454	0.122218	0.122218	4.8e-09	99914532	100638465	723.933	453	mQTL	chr7:99955544:C:G	rs2525548	ENSG00000200630	Y_RNA	cg11013060	Retina	2.3629e-09	0.000315	-0.331739	0.0521991	0.01678	-0.060442	SAME	0.0208295	0.0103358	chr7:99955544	TRUE	FALSE
AMD EUR	chr7:100393925:C:T	chr7:100393925:C:T	T	C	rs7803454	0.122218	0.122218	4.8e-09	99914532	100638465	723.933	453	mQTL	chr7:99955544:C:G	rs2525548	ENSG00000200635	Y_RNA	cg11013060	Retina	2.3629e-09	0.000315	-0.331739	0.0521991	0.01678	-0.060442	SAME	0.0208295	0.0103358	chr7:99955544	TRUE	FALSE
AMD EUR	chr7:100393925:C:T	chr7:100393925:C:T	T	C	rs7803454	0.122218	0.122218	4.8e-09	99914532	100638465	723.933	453	mQTL	chr7:99955544:C:G	rs2525548	ENSG00000200646	Y_RNA	cg11013060	Retina	2.3629e-09	0.000315	-0.331739	0.0521991	0.01678	-0.060442	SAME	0.0208295	0.0103358	chr7:99955544	TRUE	FALSE
AMD EUR	chr7:100393925:C:T	chr7:100393925:C:T	T	C	rs7803454	0.122218	0.122218	4.8e-09	99914532	100638465	723.933	453	mQTL	chr7:99955544:C:G	rs2525548	ENSG00000200651	Y_RNA	cg11013060	Retina	2.3629e-09	0.000315	-0.331739	0.0521991	0.01678	-0.060442	SAME	0.0208295	0.0103358	chr7:99955544	TRUE	FALSE
AMD EUR	chr7:100393925:C:T	chr7:100393925:C:T	T	C	rs7803454	0.122218	0.122218	4.8e-09	99914532	100638465	723.933	453	mQTL	chr7:99955544:C:G	rs2525548	ENSG00000200664	Y_RNA	cg11013060	Retina	2.3629e-09	0.000315	-0.331739	0.0521991	0.01678	-0.060442	SAME	0.0208295	0.0103358	chr7:99955544	TRUE	FALSE
AMD EUR	chr7:100393925:C:T	chr7:100393925:C:T	T	C	rs7803454	0.122218	0.122218	4.8e-09	99914532	100638465	723.933	453	mQTL	chr7:99955544:C:G	rs2525548	ENSG00000200685	Y_RNA	cg11013060	Retina	2.3629e-09	0.000315	-0.331739	0.0521991	0.01678	-0.060442	SAME	0.0208295	0.0103358	chr7:99955544	TRUE	FALSE
AMD EUR	chr7:100393925:C:T	chr7:100393925:C:T	T	C	rs7803454	0.122218	0.122218	4.8e-09	99914532	100638465	723.933	453	mQTL	chr7:99955544:C:G	rs2525548	ENSG00000200688	Y_RNA	cg11013060	Retina	2.3629e-09	0.000315	-0.331739	0.0521991	0.01678	-0.060442	SAME	0.0208295	0.0103358	chr7:99955544	TRUE	FALSE
AMD EUR	chr7:100393925:C:T	chr7:100393925:C:T	T	C	rs7803454	0.122218	0.122218	4.8e-09	99914532	100638465	723.933	453	mQTL	chr7:99955544:C:G	rs2525548	ENSG00000200702	Y_RNA	cg11013060	Retina	2.3629e-09	0.000315	-0.331739	0.0521991	0.01678	-0.060442	SAME	0.0208295	0.0103358	chr7:99955544	TRUE	FALSE
AMD EUR	chr7:100393925:C:T	chr7:100393925:C:T	T	C	rs7803454	0.122218	0.122218	4.8e-09	99914532	100638465	723.933	453	mQTL	chr7:99955544:C:G	rs2525548	ENSG00000200714	Y_RNA	cg11013060	Retina	2.3629e-09	0.000315	-0.331739	0.0521991	0.01678	-0.060442	SAME	0.0208295	0.0103358	chr7:99955544	TRUE	FALSE
AMD EUR	chr7:100393925:C:T	chr7:100393925:C:T	T	C	rs7803454	0.122218	0.122218	4.8e-09	99914532	100638465	723.933	453	mQTL	chr7:99955544:C:G	rs2525548	ENSG00000200737	Y_RNA	cg11013060	Retina	2.3629e-09	0.000315	-0.331739	0.0521991	0.01678	-0.060442	SAME	0.0208295	0.0103358	chr7:99955544	TRUE	FALSE
AMD EUR	chr7:100393925:C:T	chr7:100393925:C:T	T	C	rs7803454	0.122218	0.122218	4.8e-09	99914532	100638465	723.933	453	mQTL	chr7:99955544:C:G	rs2525548	ENSG00000200742	Y_RNA	cg11013060	Retina	2.3629e-09	0.000315	-0.331739	0.0521991	0.01678	-0.060442	SAME	0.0208295	0.0103358	chr7:99955544	TRUE	FALSE
AMD EUR	chr7:100393925:C:T	chr7:100393925:C:T	T	C	rs7803454	0.122218	0.122218	4.8e-09	99914532	100638465	723.933	453	mQTL	chr7:99955544:C:G	rs2525548	ENSG00000200750	Y_RNA	cg11013060	Retina	2.3629e-09	0.000315	-0.331739	0.0521991	0.01678	-0.060442	SAME	0.0208295	0.0103358	chr7:99955544	TRUE	FALSE
AMD EUR	chr7:100393925:C:T	chr7:100393925:C:T	T	C	rs7803454	0.122218	0.122218	4.8e-09	99914532	100638465	723.933	453	mQTL	chr7:99955544:C:G	rs2525548	ENSG00000200752	Y_RNA	cg11013060	Retina	2.3629e-09	0.000315	-0.331739	0.0521991	0.01678	-0.060442	SAME	0.0208295	0.0103358	chr7:99955544	TRUE	FALSE
AMD EUR	chr7:100393925:C:T	chr7:100393925:C:T	T	C	rs7803454	0.122218	0.122218	4.8e-09	99914532	100638465	723.933	453	mQTL	chr7:99955544:C:G	rs2525548	ENSG00000200754	Y_RNA	cg11013060	Retina	2.3629e-09	0.000315	-0.331739	0.0521991	0.01678	-0.060442	SAME	0.0208295	0.0103358	chr7:99955544	TRUE	FALSE
AMD EUR	chr7:100393925:C:T	chr7:100393925:C:T	T	C	rs7803454	0.122218	0.122218	4.8e-09	99914532	100638465	723.933	453	mQTL	chr7:99955544:C:G	rs2525548	ENSG00000200764	Y_RNA	cg11013060	Retina	2.3629e-09	0.000315	-0.331739	0.0521991	0.01678	-0.060442	SAME	0.0208295	0.0103358	chr7:99955544	TRUE	FALSE
AMD EUR	chr7:100393925:C:T	chr7:100393925:C:T	T	C	rs7803454	0.122218	0.122218	4.8e-09	99914532	100638465	723.933	453	mQTL	chr7:99955544:C:G	rs2525548	ENSG00000200769	Y_RNA	cg11013060	Retina	2.3629e-09	0.000315	-0.331739	0.0521991	0.01678	-0.060442	SAME	0.0208295	0.0103358	chr7:99955544	TRUE	FALSE
AMD EUR	chr7:100393925:C:T	chr7:100393925:C:T	T	C	rs7803454	0.122218	0.122218	4.8e-09	99914532	100638465	723.933	453	mQTL	chr7:99955544:C:G	rs2525548	ENSG00000200788	Y_RNA	cg11013060	Retina	2.3629e-09	0.000315	-0.331739	0.0521991	0.01678	-0.060442	SAME	0.0208295	0.0103358	chr7:99955544	TRUE	FALSE
AMD EUR	chr7:100393925:C:T	chr7:100393925:C:T	T	C	rs7803454	0.122218	0.122218	4.8e-09	99914532	100638465	723.933	453	mQTL	chr7:99955544:C:G	rs2525548	ENSG00000200822	Y_RNA	cg11013060	Retina	2.3629e-09	0.000315	-0.331739	0.0521991	0.01678	-0.060442	SAME	0.0208295	0.0103358	chr7:99955544	TRUE	FALSE
AMD EUR	chr7:100393925:C:T	chr7:100393925:C:T	T	C	rs7803454	0.122218	0.122218	4.8e-09	99914532	100638465	723.933	453	mQTL	chr7:99955544:C:G	rs2525548	ENSG00000200829	Y_RNA	cg11013060	Retina	2.3629e-09	0.000315	-0.331739	0.0521991	0.01678	-0.060442	SAME	0.0208295	0.0103358	chr7:99955544	TRUE	FALSE
AMD EUR	chr7:100393925:C:T	chr7:100393925:C:T	T	C	rs7803454	0.122218	0.122218	4.8e-09	99914532	100638465	723.933	453	mQTL	chr7:99955544:C:G	rs2525548	ENSG00000200834	Y_RNA	cg11013060	Retina	2.3629e-09	0.000315	-0.331739	0.0521991	0.01678	-0.060442	SAME	0.0208295	0.0103358	chr7:99955544	TRUE	FALSE
AMD EUR	chr7:100393925:C:T	chr7:100393925:C:T	T	C	rs7803454	0.122218	0.122218	4.8e-09	99914532	100638465	723.933	453	mQTL	chr7:99955544:C:G	rs2525548	ENSG00000200842	Y_RNA	cg11013060	Retina	2.3629e-09	0.000315	-0.331739	0.0521991	0.01678	-0.060442	SAME	0.0208295	0.0103358	chr7:99955544	TRUE	FALSE
AMD EUR	chr7:100393925:C:T	chr7:100393925:C:T	T	C	rs7803454	0.122218	0.122218	4.8e-09	99914532	100638465	723.933	453	mQTL	chr7:99955544:C:G	rs2525548	ENSG00000200847	Y_RNA	cg11013060	Retina	2.3629e-09	0.000315	-0.331739	0.0521991	0.01678	-0.060442	SAME	0.0208295	0.0103358	chr7:99955544	TRUE	FALSE
AMD EUR	chr7:100393925:C:T	chr7:100393925:C:T	T	C	rs7803454	0.122218	0.122218	4.8e-09	99914532	100638465	723.933	453	mQTL	chr7:99955544:C:G	rs2525548	ENSG00000200849	Y_RNA	cg11013060	Retina	2.3629e-09	0.000315	-0.331739	0.0521991	0.01678	-0.060442	SAME	0.0208295	0.0103358	chr7:99955544	TRUE	FALSE
AMD EUR	chr7:100393925:C:T	chr7:100393925:C:T	T	C	rs7803454	0.122218	0.122218	4.8e-09	99914532	100638465	723.933	453	mQTL	chr7:99955544:C:G	rs2525548	ENSG00000200855	Y_RNA	cg11013060	Retina	2.3629e-09	0.000315	-0.331739	0.0521991	0.01678	-0.060442	SAME	0.0208295	0.0103358	chr7:99955544	TRUE	FALSE
AMD EUR	chr7:100393925:C:T	chr7:100393925:C:T	T	C	rs7803454	0.122218	0.122218	4.8e-09	99914532	100638465	723.933	453	mQTL	chr7:99955544:C:G	rs2525548	ENSG00000200857	Y_RNA	cg11013060	Retina	2.3629e-09	0.000315	-0.331739	0.0521991	0.01678	-0.060442	SAME	0.0208295	0.0103358	chr7:99955544	TRUE	FALSE
AMD EUR	chr7:100393925:C:T	chr7:100393925:C:T	T	C	rs7803454	0.122218	0.122218	4.8e-09	99914532	100638465	723.933	453	mQTL	chr7:99955544:C:G	rs2525548	ENSG00000200860	Y_RNA	cg11013060	Retina	2.3629e-09	0.000315	-0.331739	0.0521991	0.01678	-0.060442	SAME	0.0208295	0.0103358	chr7:99955544	TRUE	FALSE
AMD EUR	chr7:100393925:C:T	chr7:100393925:C:T	T	C	rs7803454	0.122218	0.122218	4.8e-09	99914532	100638465	723.933	453	mQTL	chr7:99955544:C:G	rs2525548	ENSG00000200874	Y_RNA	cg11013060	Retina	2.3629e-09	0.000315	-0.331739	0.0521991	0.01678	-0.060442	SAME	0.0208295	0.0103358	chr7:99955544	TRUE	FALSE
AMD EUR	chr7:100393925:C:T	chr7:100393925:C:T	T	C	rs7803454	0.122218	0.122218	4.8e-09	99914532	100638465	723.933	453	mQTL	chr7:99955544:C:G	rs2525548	ENSG00000200883	Y_RNA	cg11013060	Retina	2.3629e-09	0.000315	-0.331739	0.0521991	0.01678	-0.060442	SAME	0.0208295	0.0103358	chr7:99955544	TRUE	FALSE
AMD EUR	chr7:100393925:C:T	chr7:100393925:C:T	T	C	rs7803454	0.122218	0.122218	4.8e-09	99914532	100638465	723.933	453	mQTL	chr7:99955544:C:G	rs2525548	ENSG00000200884	Y_RNA	cg11013060	Retina	2.3629e-09	0.000315	-0.331739	0.0521991	0.01678	-0.060442	SAME	0.0208295	0.0103358	chr7:99955544	TRUE	FALSE
AMD EUR	chr7:100393925:C:T	chr7:100393925:C:T	T	C	rs7803454	0.122218	0.122218	4.8e-09	99914532	100638465	723.933	453	mQTL	chr7:99955544:C:G	rs2525548	ENSG00000200888	Y_RNA	cg11013060	Retina	2.3629e-09	0.000315	-0.331739	0.0521991	0.01678	-0.060442	SAME	0.0208295	0.0103358	chr7:99955544	TRUE	FALSE
AMD EUR	chr7:100393925:C:T	chr7:100393925:C:T	T	C	rs7803454	0.122218	0.122218	4.8e-09	99914532	100638465	723.933	453	mQTL	chr7:99955544:C:G	rs2525548	ENSG00000200922	Y_RNA	cg11013060	Retina	2.3629e-09	0.000315	-0.331739	0.0521991	0.01678	-0.060442	SAME	0.0208295	0.0103358	chr7:99955544	TRUE	FALSE
AMD EUR	chr7:100393925:C:T	chr7:100393925:C:T	T	C	rs7803454	0.122218	0.122218	4.8e-09	99914532	100638465	723.933	453	mQTL	chr7:99955544:C:G	rs2525548	ENSG00000200953	Y_RNA	cg11013060	Retina	2.3629e-09	0.000315	-0.331739	0.0521991	0.01678	-0.060442	SAME	0.0208295	0.0103358	chr7:99955544	TRUE	FALSE
AMD EUR	chr7:100393925:C:T	chr7:100393925:C:T	T	C	rs7803454	0.122218	0.122218	4.8e-09	99914532	100638465	723.933	453	mQTL	chr7:99955544:C:G	rs2525548	ENSG00000200976	Y_RNA	cg11013060	Retina	2.3629e-09	0.000315	-0.331739	0.0521991	0.01678	-0.060442	SAME	0.0208295	0.0103358	chr7:99955544	TRUE	FALSE
AMD EUR	chr7:100393925:C:T	chr7:100393925:C:T	T	C	rs7803454	0.122218	0.122218	4.8e-09	99914532	100638465	723.933	453	mQTL	chr7:99955544:C:G	rs2525548	ENSG00000200982	Y_RNA	cg11013060	Retina	2.3629e-09	0.000315	-0.331739	0.0521991	0.01678	-0.060442	SAME	0.0208295	0.0103358	chr7:99955544	TRUE	FALSE
AMD EUR	chr7:100393925:C:T	chr7:100393925:C:T	T	C	rs7803454	0.122218	0.122218	4.8e-09	99914532	100638465	723.933	453	mQTL	chr7:99955544:C:G	rs2525548	ENSG00000200998	Y_RNA	cg11013060	Retina	2.3629e-09	0.000315	-0.331739	0.0521991	0.01678	-0.060442	SAME	0.0208295	0.0103358	chr7:99955544	TRUE	FALSE
AMD EUR	chr7:100393925:C:T	chr7:100393925:C:T	T	C	rs7803454	0.122218	0.122218	4.8e-09	99914532	100638465	723.933	453	mQTL	chr7:99955544:C:G	rs2525548	ENSG00000201006	Y_RNA	cg11013060	Retina	2.3629e-09	0.000315	-0.331739	0.0521991	0.01678	-0.060442	SAME	0.0208295	0.0103358	chr7:99955544	TRUE	FALSE
AMD EUR	chr7:100393925:C:T	chr7:100393925:C:T	T	C	rs7803454	0.122218	0.122218	4.8e-09	99914532	100638465	723.933	453	mQTL	chr7:99955544:C:G	rs2525548	ENSG00000201012	Y_RNA	cg11013060	Retina	2.3629e-09	0.000315	-0.331739	0.0521991	0.01678	-0.060442	SAME	0.0208295	0.0103358	chr7:99955544	TRUE	FALSE
AMD EUR	chr7:100393925:C:T	chr7:100393925:C:T	T	C	rs7803454	0.122218	0.122218	4.8e-09	99914532	100638465	723.933	453	mQTL	chr7:99955544:C:G	rs2525548	ENSG00000201013	Y_RNA	cg11013060	Retina	2.3629e-09	0.000315	-0.331739	0.0521991	0.01678	-0.060442	SAME	0.0208295	0.0103358	chr7:99955544	TRUE	FALSE
AMD EUR	chr7:100393925:C:T	chr7:100393925:C:T	T	C	rs7803454	0.122218	0.122218	4.8e-09	99914532	100638465	723.933	453	mQTL	chr7:99955544:C:G	rs2525548	ENSG00000201026	Y_RNA	cg11013060	Retina	2.3629e-09	0.000315	-0.331739	0.0521991	0.01678	-0.060442	SAME	0.0208295	0.0103358	chr7:99955544	TRUE	FALSE
AMD EUR	chr7:100393925:C:T	chr7:100393925:C:T	T	C	rs7803454	0.122218	0.122218	4.8e-09	99914532	100638465	723.933	453	mQTL	chr7:99955544:C:G	rs2525548	ENSG00000201031	Y_RNA	cg11013060	Retina	2.3629e-09	0.000315	-0.331739	0.0521991	0.01678	-0.060442	SAME	0.0208295	0.0103358	chr7:99955544	TRUE	FALSE
AMD EUR	chr7:100393925:C:T	chr7:100393925:C:T	T	C	rs7803454	0.122218	0.122218	4.8e-09	99914532	100638465	723.933	453	mQTL	chr7:99955544:C:G	rs2525548	ENSG00000201034	Y_RNA	cg11013060	Retina	2.3629e-09	0.000315	-0.331739	0.0521991	0.01678	-0.060442	SAME	0.0208295	0.0103358	chr7:99955544	TRUE	FALSE
AMD EUR	chr7:100393925:C:T	chr7:100393925:C:T	T	C	rs7803454	0.122218	0.122218	4.8e-09	99914532	100638465	723.933	453	mQTL	chr7:99955544:C:G	rs2525548	ENSG00000201047	Y_RNA	cg11013060	Retina	2.3629e-09	0.000315	-0.331739	0.0521991	0.01678	-0.060442	SAME	0.0208295	0.0103358	chr7:99955544	TRUE	FALSE
AMD EUR	chr7:100393925:C:T	chr7:100393925:C:T	T	C	rs7803454	0.122218	0.122218	4.8e-09	99914532	100638465	723.933	453	mQTL	chr7:99955544:C:G	rs2525548	ENSG00000201048	Y_RNA	cg11013060	Retina	2.3629e-09	0.000315	-0.331739	0.0521991	0.01678	-0.060442	SAME	0.0208295	0.0103358	chr7:99955544	TRUE	FALSE
AMD EUR	chr7:100393925:C:T	chr7:100393925:C:T	T	C	rs7803454	0.122218	0.122218	4.8e-09	99914532	100638465	723.933	453	mQTL	chr7:99955544:C:G	rs2525548	ENSG00000201071	Y_RNA	cg11013060	Retina	2.3629e-09	0.000315	-0.331739	0.0521991	0.01678	-0.060442	SAME	0.0208295	0.0103358	chr7:99955544	TRUE	FALSE
AMD EUR	chr7:100393925:C:T	chr7:100393925:C:T	T	C	rs7803454	0.122218	0.122218	4.8e-09	99914532	100638465	723.933	453	mQTL	chr7:99955544:C:G	rs2525548	ENSG00000201074	Y_RNA	cg11013060	Retina	2.3629e-09	0.000315	-0.331739	0.0521991	0.01678	-0.060442	SAME	0.0208295	0.0103358	chr7:99955544	TRUE	FALSE
AMD EUR	chr7:100393925:C:T	chr7:100393925:C:T	T	C	rs7803454	0.122218	0.122218	4.8e-09	99914532	100638465	723.933	453	mQTL	chr7:99955544:C:G	rs2525548	ENSG00000201075	Y_RNA	cg11013060	Retina	2.3629e-09	0.000315	-0.331739	0.0521991	0.01678	-0.060442	SAME	0.0208295	0.0103358	chr7:99955544	TRUE	FALSE
AMD EUR	chr7:100393925:C:T	chr7:100393925:C:T	T	C	rs7803454	0.122218	0.122218	4.8e-09	99914532	100638465	723.933	453	mQTL	chr7:99955544:C:G	rs2525548	ENSG00000201084	Y_RNA	cg11013060	Retina	2.3629e-09	0.000315	-0.331739	0.0521991	0.01678	-0.060442	SAME	0.0208295	0.0103358	chr7:99955544	TRUE	FALSE
AMD EUR	chr7:100393925:C:T	chr7:100393925:C:T	T	C	rs7803454	0.122218	0.122218	4.8e-09	99914532	100638465	723.933	453	mQTL	chr7:99955544:C:G	rs2525548	ENSG00000201088	Y_RNA	cg11013060	Retina	2.3629e-09	0.000315	-0.331739	0.0521991	0.01678	-0.060442	SAME	0.0208295	0.0103358	chr7:99955544	TRUE	FALSE
AMD EUR	chr7:100393925:C:T	chr7:100393925:C:T	T	C	rs7803454	0.122218	0.122218	4.8e-09	99914532	100638465	723.933	453	mQTL	chr7:99955544:C:G	rs2525548	ENSG00000201102	Y_RNA	cg11013060	Retina	2.3629e-09	0.000315	-0.331739	0.0521991	0.01678	-0.060442	SAME	0.0208295	0.0103358	chr7:99955544	TRUE	FALSE
AMD EUR	chr7:100393925:C:T	chr7:100393925:C:T	T	C	rs7803454	0.122218	0.122218	4.8e-09	99914532	100638465	723.933	453	mQTL	chr7:99955544:C:G	rs2525548	ENSG00000201114	Y_RNA	cg11013060	Retina	2.3629e-09	0.000315	-0.331739	0.0521991	0.01678	-0.060442	SAME	0.0208295	0.0103358	chr7:99955544	TRUE	FALSE
AMD EUR	chr7:100393925:C:T	chr7:100393925:C:T	T	C	rs7803454	0.122218	0.122218	4.8e-09	99914532	100638465	723.933	453	mQTL	chr7:99955544:C:G	rs2525548	ENSG00000201118	Y_RNA	cg11013060	Retina	2.3629e-09	0.000315	-0.331739	0.0521991	0.01678	-0.060442	SAME	0.0208295	0.0103358	chr7:99955544	TRUE	FALSE
AMD EUR	chr7:100393925:C:T	chr7:100393925:C:T	T	C	rs7803454	0.122218	0.122218	4.8e-09	99914532	100638465	723.933	453	mQTL	chr7:99955544:C:G	rs2525548	ENSG00000201134	Y_RNA	cg11013060	Retina	2.3629e-09	0.000315	-0.331739	0.0521991	0.01678	-0.060442	SAME	0.0208295	0.0103358	chr7:99955544	TRUE	FALSE
AMD EUR	chr7:100393925:C:T	chr7:100393925:C:T	T	C	rs7803454	0.122218	0.122218	4.8e-09	99914532	100638465	723.933	453	mQTL	chr7:99955544:C:G	rs2525548	ENSG00000201160	Y_RNA	cg11013060	Retina	2.3629e-09	0.000315	-0.331739	0.0521991	0.01678	-0.060442	SAME	0.0208295	0.0103358	chr7:99955544	TRUE	FALSE
AMD EUR	chr7:100393925:C:T	chr7:100393925:C:T	T	C	rs7803454	0.122218	0.122218	4.8e-09	99914532	100638465	723.933	453	mQTL	chr7:99955544:C:G	rs2525548	ENSG00000201178	Y_RNA	cg11013060	Retina	2.3629e-09	0.000315	-0.331739	0.0521991	0.01678	-0.060442	SAME	0.0208295	0.0103358	chr7:99955544	TRUE	FALSE
AMD EUR	chr7:100393925:C:T	chr7:100393925:C:T	T	C	rs7803454	0.122218	0.122218	4.8e-09	99914532	100638465	723.933	453	mQTL	chr7:99955544:C:G	rs2525548	ENSG00000201196	Y_RNA	cg11013060	Retina	2.3629e-09	0.000315	-0.331739	0.0521991	0.01678	-0.060442	SAME	0.0208295	0.0103358	chr7:99955544	TRUE	FALSE
AMD EUR	chr7:100393925:C:T	chr7:100393925:C:T	T	C	rs7803454	0.122218	0.122218	4.8e-09	99914532	100638465	723.933	453	mQTL	chr7:99955544:C:G	rs2525548	ENSG00000201207	Y_RNA	cg11013060	Retina	2.3629e-09	0.000315	-0.331739	0.0521991	0.01678	-0.060442	SAME	0.0208295	0.0103358	chr7:99955544	TRUE	FALSE
AMD EUR	chr7:100393925:C:T	chr7:100393925:C:T	T	C	rs7803454	0.122218	0.122218	4.8e-09	99914532	100638465	723.933	453	mQTL	chr7:99955544:C:G	rs2525548	ENSG00000201208	Y_RNA	cg11013060	Retina	2.3629e-09	0.000315	-0.331739	0.0521991	0.01678	-0.060442	SAME	0.0208295	0.0103358	chr7:99955544	TRUE	FALSE
AMD EUR	chr7:100393925:C:T	chr7:100393925:C:T	T	C	rs7803454	0.122218	0.122218	4.8e-09	99914532	100638465	723.933	453	mQTL	chr7:99955544:C:G	rs2525548	ENSG00000201216	Y_RNA	cg11013060	Retina	2.3629e-09	0.000315	-0.331739	0.0521991	0.01678	-0.060442	SAME	0.0208295	0.0103358	chr7:99955544	TRUE	FALSE
AMD EUR	chr7:100393925:C:T	chr7:100393925:C:T	T	C	rs7803454	0.122218	0.122218	4.8e-09	99914532	100638465	723.933	453	mQTL	chr7:99955544:C:G	rs2525548	ENSG00000201217	Y_RNA	cg11013060	Retina	2.3629e-09	0.000315	-0.331739	0.0521991	0.01678	-0.060442	SAME	0.0208295	0.0103358	chr7:99955544	TRUE	FALSE
AMD EUR	chr7:100393925:C:T	chr7:100393925:C:T	T	C	rs7803454	0.122218	0.122218	4.8e-09	99914532	100638465	723.933	453	mQTL	chr7:99955544:C:G	rs2525548	ENSG00000201218	Y_RNA	cg11013060	Retina	2.3629e-09	0.000315	-0.331739	0.0521991	0.01678	-0.060442	SAME	0.0208295	0.0103358	chr7:99955544	TRUE	FALSE
AMD EUR	chr7:100393925:C:T	chr7:100393925:C:T	T	C	rs7803454	0.122218	0.122218	4.8e-09	99914532	100638465	723.933	453	mQTL	chr7:99955544:C:G	rs2525548	ENSG00000201228	Y_RNA	cg11013060	Retina	2.3629e-09	0.000315	-0.331739	0.0521991	0.01678	-0.060442	SAME	0.0208295	0.0103358	chr7:99955544	TRUE	FALSE
AMD EUR	chr7:100393925:C:T	chr7:100393925:C:T	T	C	rs7803454	0.122218	0.122218	4.8e-09	99914532	100638465	723.933	453	mQTL	chr7:99955544:C:G	rs2525548	ENSG00000201239	Y_RNA	cg11013060	Retina	2.3629e-09	0.000315	-0.331739	0.0521991	0.01678	-0.060442	SAME	0.0208295	0.0103358	chr7:99955544	TRUE	FALSE
AMD EUR	chr7:100393925:C:T	chr7:100393925:C:T	T	C	rs7803454	0.122218	0.122218	4.8e-09	99914532	100638465	723.933	453	mQTL	chr7:99955544:C:G	rs2525548	ENSG00000201277	Y_RNA	cg11013060	Retina	2.3629e-09	0.000315	-0.331739	0.0521991	0.01678	-0.060442	SAME	0.0208295	0.0103358	chr7:99955544	TRUE	FALSE
AMD EUR	chr7:100393925:C:T	chr7:100393925:C:T	T	C	rs7803454	0.122218	0.122218	4.8e-09	99914532	100638465	723.933	453	mQTL	chr7:99955544:C:G	rs2525548	ENSG00000201279	Y_RNA	cg11013060	Retina	2.3629e-09	0.000315	-0.331739	0.0521991	0.01678	-0.060442	SAME	0.0208295	0.0103358	chr7:99955544	TRUE	FALSE
AMD EUR	chr7:100393925:C:T	chr7:100393925:C:T	T	C	rs7803454	0.122218	0.122218	4.8e-09	99914532	100638465	723.933	453	mQTL	chr7:99955544:C:G	rs2525548	ENSG00000201282	Y_RNA	cg11013060	Retina	2.3629e-09	0.000315	-0.331739	0.0521991	0.01678	-0.060442	SAME	0.0208295	0.0103358	chr7:99955544	TRUE	FALSE
AMD EUR	chr7:100393925:C:T	chr7:100393925:C:T	T	C	rs7803454	0.122218	0.122218	4.8e-09	99914532	100638465	723.933	453	mQTL	chr7:99955544:C:G	rs2525548	ENSG00000201297	Y_RNA	cg11013060	Retina	2.3629e-09	0.000315	-0.331739	0.0521991	0.01678	-0.060442	SAME	0.0208295	0.0103358	chr7:99955544	TRUE	FALSE
AMD EUR	chr7:100393925:C:T	chr7:100393925:C:T	T	C	rs7803454	0.122218	0.122218	4.8e-09	99914532	100638465	723.933	453	mQTL	chr7:99955544:C:G	rs2525548	ENSG00000201309	Y_RNA	cg11013060	Retina	2.3629e-09	0.000315	-0.331739	0.0521991	0.01678	-0.060442	SAME	0.0208295	0.0103358	chr7:99955544	TRUE	FALSE
AMD EUR	chr7:100393925:C:T	chr7:100393925:C:T	T	C	rs7803454	0.122218	0.122218	4.8e-09	99914532	100638465	723.933	453	mQTL	chr7:99955544:C:G	rs2525548	ENSG00000201311	Y_RNA	cg11013060	Retina	2.3629e-09	0.000315	-0.331739	0.0521991	0.01678	-0.060442	SAME	0.0208295	0.0103358	chr7:99955544	TRUE	FALSE
AMD EUR	chr7:100393925:C:T	chr7:100393925:C:T	T	C	rs7803454	0.122218	0.122218	4.8e-09	99914532	100638465	723.933	453	mQTL	chr7:99955544:C:G	rs2525548	ENSG00000201314	Y_RNA	cg11013060	Retina	2.3629e-09	0.000315	-0.331739	0.0521991	0.01678	-0.060442	SAME	0.0208295	0.0103358	chr7:99955544	TRUE	FALSE
AMD EUR	chr7:100393925:C:T	chr7:100393925:C:T	T	C	rs7803454	0.122218	0.122218	4.8e-09	99914532	100638465	723.933	453	mQTL	chr7:99955544:C:G	rs2525548	ENSG00000201339	Y_RNA	cg11013060	Retina	2.3629e-09	0.000315	-0.331739	0.0521991	0.01678	-0.060442	SAME	0.0208295	0.0103358	chr7:99955544	TRUE	FALSE
AMD EUR	chr7:100393925:C:T	chr7:100393925:C:T	T	C	rs7803454	0.122218	0.122218	4.8e-09	99914532	100638465	723.933	453	mQTL	chr7:99955544:C:G	rs2525548	ENSG00000201340	Y_RNA	cg11013060	Retina	2.3629e-09	0.000315	-0.331739	0.0521991	0.01678	-0.060442	SAME	0.0208295	0.0103358	chr7:99955544	TRUE	FALSE
AMD EUR	chr7:100393925:C:T	chr7:100393925:C:T	T	C	rs7803454	0.122218	0.122218	4.8e-09	99914532	100638465	723.933	453	mQTL	chr7:99955544:C:G	rs2525548	ENSG00000201343	Y_RNA	cg11013060	Retina	2.3629e-09	0.000315	-0.331739	0.0521991	0.01678	-0.060442	SAME	0.0208295	0.0103358	chr7:99955544	TRUE	FALSE
AMD EUR	chr7:100393925:C:T	chr7:100393925:C:T	T	C	rs7803454	0.122218	0.122218	4.8e-09	99914532	100638465	723.933	453	mQTL	chr7:99955544:C:G	rs2525548	ENSG00000201351	Y_RNA	cg11013060	Retina	2.3629e-09	0.000315	-0.331739	0.0521991	0.01678	-0.060442	SAME	0.0208295	0.0103358	chr7:99955544	TRUE	FALSE
AMD EUR	chr7:100393925:C:T	chr7:100393925:C:T	T	C	rs7803454	0.122218	0.122218	4.8e-09	99914532	100638465	723.933	453	mQTL	chr7:99955544:C:G	rs2525548	ENSG00000201354	Y_RNA	cg11013060	Retina	2.3629e-09	0.000315	-0.331739	0.0521991	0.01678	-0.060442	SAME	0.0208295	0.0103358	chr7:99955544	TRUE	FALSE
AMD EUR	chr7:100393925:C:T	chr7:100393925:C:T	T	C	rs7803454	0.122218	0.122218	4.8e-09	99914532	100638465	723.933	453	mQTL	chr7:99955544:C:G	rs2525548	ENSG00000201363	Y_RNA	cg11013060	Retina	2.3629e-09	0.000315	-0.331739	0.0521991	0.01678	-0.060442	SAME	0.0208295	0.0103358	chr7:99955544	TRUE	FALSE
AMD EUR	chr7:100393925:C:T	chr7:100393925:C:T	T	C	rs7803454	0.122218	0.122218	4.8e-09	99914532	100638465	723.933	453	mQTL	chr7:99955544:C:G	rs2525548	ENSG00000201365	Y_RNA	cg11013060	Retina	2.3629e-09	0.000315	-0.331739	0.0521991	0.01678	-0.060442	SAME	0.0208295	0.0103358	chr7:99955544	TRUE	FALSE
AMD EUR	chr7:100393925:C:T	chr7:100393925:C:T	T	C	rs7803454	0.122218	0.122218	4.8e-09	99914532	100638465	723.933	453	mQTL	chr7:99955544:C:G	rs2525548	ENSG00000201370	Y_RNA	cg11013060	Retina	2.3629e-09	0.000315	-0.331739	0.0521991	0.01678	-0.060442	SAME	0.0208295	0.0103358	chr7:99955544	TRUE	FALSE
AMD EUR	chr7:100393925:C:T	chr7:100393925:C:T	T	C	rs7803454	0.122218	0.122218	4.8e-09	99914532	100638465	723.933	453	mQTL	chr7:99955544:C:G	rs2525548	ENSG00000201371	Y_RNA	cg11013060	Retina	2.3629e-09	0.000315	-0.331739	0.0521991	0.01678	-0.060442	SAME	0.0208295	0.0103358	chr7:99955544	TRUE	FALSE
AMD EUR	chr7:100393925:C:T	chr7:100393925:C:T	T	C	rs7803454	0.122218	0.122218	4.8e-09	99914532	100638465	723.933	453	mQTL	chr7:99955544:C:G	rs2525548	ENSG00000201405	Y_RNA	cg11013060	Retina	2.3629e-09	0.000315	-0.331739	0.0521991	0.01678	-0.060442	SAME	0.0208295	0.0103358	chr7:99955544	TRUE	FALSE
AMD EUR	chr7:100393925:C:T	chr7:100393925:C:T	T	C	rs7803454	0.122218	0.122218	4.8e-09	99914532	100638465	723.933	453	mQTL	chr7:99955544:C:G	rs2525548	ENSG00000201412	Y_RNA	cg11013060	Retina	2.3629e-09	0.000315	-0.331739	0.0521991	0.01678	-0.060442	SAME	0.0208295	0.0103358	chr7:99955544	TRUE	FALSE
AMD EUR	chr7:100393925:C:T	chr7:100393925:C:T	T	C	rs7803454	0.122218	0.122218	4.8e-09	99914532	100638465	723.933	453	mQTL	chr7:99955544:C:G	rs2525548	ENSG00000201421	Y_RNA	cg11013060	Retina	2.3629e-09	0.000315	-0.331739	0.0521991	0.01678	-0.060442	SAME	0.0208295	0.0103358	chr7:99955544	TRUE	FALSE
AMD EUR	chr7:100393925:C:T	chr7:100393925:C:T	T	C	rs7803454	0.122218	0.122218	4.8e-09	99914532	100638465	723.933	453	mQTL	chr7:99955544:C:G	rs2525548	ENSG00000201426	Y_RNA	cg11013060	Retina	2.3629e-09	0.000315	-0.331739	0.0521991	0.01678	-0.060442	SAME	0.0208295	0.0103358	chr7:99955544	TRUE	FALSE
AMD EUR	chr7:100393925:C:T	chr7:100393925:C:T	T	C	rs7803454	0.122218	0.122218	4.8e-09	99914532	100638465	723.933	453	mQTL	chr7:99955544:C:G	rs2525548	ENSG00000201432	Y_RNA	cg11013060	Retina	2.3629e-09	0.000315	-0.331739	0.0521991	0.01678	-0.060442	SAME	0.0208295	0.0103358	chr7:99955544	TRUE	FALSE
AMD EUR	chr7:100393925:C:T	chr7:100393925:C:T	T	C	rs7803454	0.122218	0.122218	4.8e-09	99914532	100638465	723.933	453	mQTL	chr7:99955544:C:G	rs2525548	ENSG00000201442	Y_RNA	cg11013060	Retina	2.3629e-09	0.000315	-0.331739	0.0521991	0.01678	-0.060442	SAME	0.0208295	0.0103358	chr7:99955544	TRUE	FALSE
AMD EUR	chr7:100393925:C:T	chr7:100393925:C:T	T	C	rs7803454	0.122218	0.122218	4.8e-09	99914532	100638465	723.933	453	mQTL	chr7:99955544:C:G	rs2525548	ENSG00000201451	Y_RNA	cg11013060	Retina	2.3629e-09	0.000315	-0.331739	0.0521991	0.01678	-0.060442	SAME	0.0208295	0.0103358	chr7:99955544	TRUE	FALSE
AMD EUR	chr7:100393925:C:T	chr7:100393925:C:T	T	C	rs7803454	0.122218	0.122218	4.8e-09	99914532	100638465	723.933	453	mQTL	chr7:99955544:C:G	rs2525548	ENSG00000201464	Y_RNA	cg11013060	Retina	2.3629e-09	0.000315	-0.331739	0.0521991	0.01678	-0.060442	SAME	0.0208295	0.0103358	chr7:99955544	TRUE	FALSE
AMD EUR	chr7:100393925:C:T	chr7:100393925:C:T	T	C	rs7803454	0.122218	0.122218	4.8e-09	99914532	100638465	723.933	453	mQTL	chr7:99955544:C:G	rs2525548	ENSG00000201466	Y_RNA	cg11013060	Retina	2.3629e-09	0.000315	-0.331739	0.0521991	0.01678	-0.060442	SAME	0.0208295	0.0103358	chr7:99955544	TRUE	FALSE
AMD EUR	chr7:100393925:C:T	chr7:100393925:C:T	T	C	rs7803454	0.122218	0.122218	4.8e-09	99914532	100638465	723.933	453	mQTL	chr7:99955544:C:G	rs2525548	ENSG00000201483	Y_RNA	cg11013060	Retina	2.3629e-09	0.000315	-0.331739	0.0521991	0.01678	-0.060442	SAME	0.0208295	0.0103358	chr7:99955544	TRUE	FALSE
AMD EUR	chr7:100393925:C:T	chr7:100393925:C:T	T	C	rs7803454	0.122218	0.122218	4.8e-09	99914532	100638465	723.933	453	mQTL	chr7:99955544:C:G	rs2525548	ENSG00000201489	Y_RNA	cg11013060	Retina	2.3629e-09	0.000315	-0.331739	0.0521991	0.01678	-0.060442	SAME	0.0208295	0.0103358	chr7:99955544	TRUE	FALSE
AMD EUR	chr7:100393925:C:T	chr7:100393925:C:T	T	C	rs7803454	0.122218	0.122218	4.8e-09	99914532	100638465	723.933	453	mQTL	chr7:99955544:C:G	rs2525548	ENSG00000201498	Y_RNA	cg11013060	Retina	2.3629e-09	0.000315	-0.331739	0.0521991	0.01678	-0.060442	SAME	0.0208295	0.0103358	chr7:99955544	TRUE	FALSE
AMD EUR	chr7:100393925:C:T	chr7:100393925:C:T	T	C	rs7803454	0.122218	0.122218	4.8e-09	99914532	100638465	723.933	453	mQTL	chr7:99955544:C:G	rs2525548	ENSG00000201501	Y_RNA	cg11013060	Retina	2.3629e-09	0.000315	-0.331739	0.0521991	0.01678	-0.060442	SAME	0.0208295	0.0103358	chr7:99955544	TRUE	FALSE
AMD EUR	chr7:100393925:C:T	chr7:100393925:C:T	T	C	rs7803454	0.122218	0.122218	4.8e-09	99914532	100638465	723.933	453	mQTL	chr7:99955544:C:G	rs2525548	ENSG00000201511	Y_RNA	cg11013060	Retina	2.3629e-09	0.000315	-0.331739	0.0521991	0.01678	-0.060442	SAME	0.0208295	0.0103358	chr7:99955544	TRUE	FALSE
AMD EUR	chr7:100393925:C:T	chr7:100393925:C:T	T	C	rs7803454	0.122218	0.122218	4.8e-09	99914532	100638465	723.933	453	mQTL	chr7:99955544:C:G	rs2525548	ENSG00000201529	Y_RNA	cg11013060	Retina	2.3629e-09	0.000315	-0.331739	0.0521991	0.01678	-0.060442	SAME	0.0208295	0.0103358	chr7:99955544	TRUE	FALSE
AMD EUR	chr7:100393925:C:T	chr7:100393925:C:T	T	C	rs7803454	0.122218	0.122218	4.8e-09	99914532	100638465	723.933	453	mQTL	chr7:99955544:C:G	rs2525548	ENSG00000201535	Y_RNA	cg11013060	Retina	2.3629e-09	0.000315	-0.331739	0.0521991	0.01678	-0.060442	SAME	0.0208295	0.0103358	chr7:99955544	TRUE	FALSE
AMD EUR	chr7:100393925:C:T	chr7:100393925:C:T	T	C	rs7803454	0.122218	0.122218	4.8e-09	99914532	100638465	723.933	453	mQTL	chr7:99955544:C:G	rs2525548	ENSG00000201547	Y_RNA	cg11013060	Retina	2.3629e-09	0.000315	-0.331739	0.0521991	0.01678	-0.060442	SAME	0.0208295	0.0103358	chr7:99955544	TRUE	FALSE
AMD EUR	chr7:100393925:C:T	chr7:100393925:C:T	T	C	rs7803454	0.122218	0.122218	4.8e-09	99914532	100638465	723.933	453	mQTL	chr7:99955544:C:G	rs2525548	ENSG00000201548	Y_RNA	cg11013060	Retina	2.3629e-09	0.000315	-0.331739	0.0521991	0.01678	-0.060442	SAME	0.0208295	0.0103358	chr7:99955544	TRUE	FALSE
AMD EUR	chr7:100393925:C:T	chr7:100393925:C:T	T	C	rs7803454	0.122218	0.122218	4.8e-09	99914532	100638465	723.933	453	mQTL	chr7:99955544:C:G	rs2525548	ENSG00000201549	Y_RNA	cg11013060	Retina	2.3629e-09	0.000315	-0.331739	0.0521991	0.01678	-0.060442	SAME	0.0208295	0.0103358	chr7:99955544	TRUE	FALSE
AMD EUR	chr7:100393925:C:T	chr7:100393925:C:T	T	C	rs7803454	0.122218	0.122218	4.8e-09	99914532	100638465	723.933	453	mQTL	chr7:99955544:C:G	rs2525548	ENSG00000201554	Y_RNA	cg11013060	Retina	2.3629e-09	0.000315	-0.331739	0.0521991	0.01678	-0.060442	SAME	0.0208295	0.0103358	chr7:99955544	TRUE	FALSE
AMD EUR	chr7:100393925:C:T	chr7:100393925:C:T	T	C	rs7803454	0.122218	0.122218	4.8e-09	99914532	100638465	723.933	453	mQTL	chr7:99955544:C:G	rs2525548	ENSG00000201555	Y_RNA	cg11013060	Retina	2.3629e-09	0.000315	-0.331739	0.0521991	0.01678	-0.060442	SAME	0.0208295	0.0103358	chr7:99955544	TRUE	FALSE
AMD EUR	chr7:100393925:C:T	chr7:100393925:C:T	T	C	rs7803454	0.122218	0.122218	4.8e-09	99914532	100638465	723.933	453	mQTL	chr7:99955544:C:G	rs2525548	ENSG00000201563	Y_RNA	cg11013060	Retina	2.3629e-09	0.000315	-0.331739	0.0521991	0.01678	-0.060442	SAME	0.0208295	0.0103358	chr7:99955544	TRUE	FALSE
AMD EUR	chr7:100393925:C:T	chr7:100393925:C:T	T	C	rs7803454	0.122218	0.122218	4.8e-09	99914532	100638465	723.933	453	mQTL	chr7:99955544:C:G	rs2525548	ENSG00000201565	Y_RNA	cg11013060	Retina	2.3629e-09	0.000315	-0.331739	0.0521991	0.01678	-0.060442	SAME	0.0208295	0.0103358	chr7:99955544	TRUE	FALSE
AMD EUR	chr7:100393925:C:T	chr7:100393925:C:T	T	C	rs7803454	0.122218	0.122218	4.8e-09	99914532	100638465	723.933	453	mQTL	chr7:99955544:C:G	rs2525548	ENSG00000201566	Y_RNA	cg11013060	Retina	2.3629e-09	0.000315	-0.331739	0.0521991	0.01678	-0.060442	SAME	0.0208295	0.0103358	chr7:99955544	TRUE	FALSE
AMD EUR	chr7:100393925:C:T	chr7:100393925:C:T	T	C	rs7803454	0.122218	0.122218	4.8e-09	99914532	100638465	723.933	453	mQTL	chr7:99955544:C:G	rs2525548	ENSG00000201573	Y_RNA	cg11013060	Retina	2.3629e-09	0.000315	-0.331739	0.0521991	0.01678	-0.060442	SAME	0.0208295	0.0103358	chr7:99955544	TRUE	FALSE
AMD EUR	chr7:100393925:C:T	chr7:100393925:C:T	T	C	rs7803454	0.122218	0.122218	4.8e-09	99914532	100638465	723.933	453	mQTL	chr7:99955544:C:G	rs2525548	ENSG00000201584	Y_RNA	cg11013060	Retina	2.3629e-09	0.000315	-0.331739	0.0521991	0.01678	-0.060442	SAME	0.0208295	0.0103358	chr7:99955544	TRUE	FALSE
AMD EUR	chr7:100393925:C:T	chr7:100393925:C:T	T	C	rs7803454	0.122218	0.122218	4.8e-09	99914532	100638465	723.933	453	mQTL	chr7:99955544:C:G	rs2525548	ENSG00000201596	Y_RNA	cg11013060	Retina	2.3629e-09	0.000315	-0.331739	0.0521991	0.01678	-0.060442	SAME	0.0208295	0.0103358	chr7:99955544	TRUE	FALSE
AMD EUR	chr7:100393925:C:T	chr7:100393925:C:T	T	C	rs7803454	0.122218	0.122218	4.8e-09	99914532	100638465	723.933	453	mQTL	chr7:99955544:C:G	rs2525548	ENSG00000201602	Y_RNA	cg11013060	Retina	2.3629e-09	0.000315	-0.331739	0.0521991	0.01678	-0.060442	SAME	0.0208295	0.0103358	chr7:99955544	TRUE	FALSE
AMD EUR	chr7:100393925:C:T	chr7:100393925:C:T	T	C	rs7803454	0.122218	0.122218	4.8e-09	99914532	100638465	723.933	453	mQTL	chr7:99955544:C:G	rs2525548	ENSG00000201624	Y_RNA	cg11013060	Retina	2.3629e-09	0.000315	-0.331739	0.0521991	0.01678	-0.060442	SAME	0.0208295	0.0103358	chr7:99955544	TRUE	FALSE
AMD EUR	chr7:100393925:C:T	chr7:100393925:C:T	T	C	rs7803454	0.122218	0.122218	4.8e-09	99914532	100638465	723.933	453	mQTL	chr7:99955544:C:G	rs2525548	ENSG00000201627	Y_RNA	cg11013060	Retina	2.3629e-09	0.000315	-0.331739	0.0521991	0.01678	-0.060442	SAME	0.0208295	0.0103358	chr7:99955544	TRUE	FALSE
AMD EUR	chr7:100393925:C:T	chr7:100393925:C:T	T	C	rs7803454	0.122218	0.122218	4.8e-09	99914532	100638465	723.933	453	mQTL	chr7:99955544:C:G	rs2525548	ENSG00000201633	Y_RNA	cg11013060	Retina	2.3629e-09	0.000315	-0.331739	0.0521991	0.01678	-0.060442	SAME	0.0208295	0.0103358	chr7:99955544	TRUE	FALSE
AMD EUR	chr7:100393925:C:T	chr7:100393925:C:T	T	C	rs7803454	0.122218	0.122218	4.8e-09	99914532	100638465	723.933	453	mQTL	chr7:99955544:C:G	rs2525548	ENSG00000201635	Y_RNA	cg11013060	Retina	2.3629e-09	0.000315	-0.331739	0.0521991	0.01678	-0.060442	SAME	0.0208295	0.0103358	chr7:99955544	TRUE	FALSE
AMD EUR	chr7:100393925:C:T	chr7:100393925:C:T	T	C	rs7803454	0.122218	0.122218	4.8e-09	99914532	100638465	723.933	453	mQTL	chr7:99955544:C:G	rs2525548	ENSG00000201644	Y_RNA	cg11013060	Retina	2.3629e-09	0.000315	-0.331739	0.0521991	0.01678	-0.060442	SAME	0.0208295	0.0103358	chr7:99955544	TRUE	FALSE
AMD EUR	chr7:100393925:C:T	chr7:100393925:C:T	T	C	rs7803454	0.122218	0.122218	4.8e-09	99914532	100638465	723.933	453	mQTL	chr7:99955544:C:G	rs2525548	ENSG00000201663	Y_RNA	cg11013060	Retina	2.3629e-09	0.000315	-0.331739	0.0521991	0.01678	-0.060442	SAME	0.0208295	0.0103358	chr7:99955544	TRUE	FALSE
AMD EUR	chr7:100393925:C:T	chr7:100393925:C:T	T	C	rs7803454	0.122218	0.122218	4.8e-09	99914532	100638465	723.933	453	mQTL	chr7:99955544:C:G	rs2525548	ENSG00000201668	Y_RNA	cg11013060	Retina	2.3629e-09	0.000315	-0.331739	0.0521991	0.01678	-0.060442	SAME	0.0208295	0.0103358	chr7:99955544	TRUE	FALSE
AMD EUR	chr7:100393925:C:T	chr7:100393925:C:T	T	C	rs7803454	0.122218	0.122218	4.8e-09	99914532	100638465	723.933	453	mQTL	chr7:99955544:C:G	rs2525548	ENSG00000201676	Y_RNA	cg11013060	Retina	2.3629e-09	0.000315	-0.331739	0.0521991	0.01678	-0.060442	SAME	0.0208295	0.0103358	chr7:99955544	TRUE	FALSE
AMD EUR	chr7:100393925:C:T	chr7:100393925:C:T	T	C	rs7803454	0.122218	0.122218	4.8e-09	99914532	100638465	723.933	453	mQTL	chr7:99955544:C:G	rs2525548	ENSG00000201680	Y_RNA	cg11013060	Retina	2.3629e-09	0.000315	-0.331739	0.0521991	0.01678	-0.060442	SAME	0.0208295	0.0103358	chr7:99955544	TRUE	FALSE
AMD EUR	chr7:100393925:C:T	chr7:100393925:C:T	T	C	rs7803454	0.122218	0.122218	4.8e-09	99914532	100638465	723.933	453	mQTL	chr7:99955544:C:G	rs2525548	ENSG00000201683	Y_RNA	cg11013060	Retina	2.3629e-09	0.000315	-0.331739	0.0521991	0.01678	-0.060442	SAME	0.0208295	0.0103358	chr7:99955544	TRUE	FALSE
AMD EUR	chr7:100393925:C:T	chr7:100393925:C:T	T	C	rs7803454	0.122218	0.122218	4.8e-09	99914532	100638465	723.933	453	mQTL	chr7:99955544:C:G	rs2525548	ENSG00000201723	Y_RNA	cg11013060	Retina	2.3629e-09	0.000315	-0.331739	0.0521991	0.01678	-0.060442	SAME	0.0208295	0.0103358	chr7:99955544	TRUE	FALSE
AMD EUR	chr7:100393925:C:T	chr7:100393925:C:T	T	C	rs7803454	0.122218	0.122218	4.8e-09	99914532	100638465	723.933	453	mQTL	chr7:99955544:C:G	rs2525548	ENSG00000201724	Y_RNA	cg11013060	Retina	2.3629e-09	0.000315	-0.331739	0.0521991	0.01678	-0.060442	SAME	0.0208295	0.0103358	chr7:99955544	TRUE	FALSE
AMD EUR	chr7:100393925:C:T	chr7:100393925:C:T	T	C	rs7803454	0.122218	0.122218	4.8e-09	99914532	100638465	723.933	453	mQTL	chr7:99955544:C:G	rs2525548	ENSG00000201741	Y_RNA	cg11013060	Retina	2.3629e-09	0.000315	-0.331739	0.0521991	0.01678	-0.060442	SAME	0.0208295	0.0103358	chr7:99955544	TRUE	FALSE
AMD EUR	chr7:100393925:C:T	chr7:100393925:C:T	T	C	rs7803454	0.122218	0.122218	4.8e-09	99914532	100638465	723.933	453	mQTL	chr7:99955544:C:G	rs2525548	ENSG00000201749	Y_RNA	cg11013060	Retina	2.3629e-09	0.000315	-0.331739	0.0521991	0.01678	-0.060442	SAME	0.0208295	0.0103358	chr7:99955544	TRUE	FALSE
AMD EUR	chr7:100393925:C:T	chr7:100393925:C:T	T	C	rs7803454	0.122218	0.122218	4.8e-09	99914532	100638465	723.933	453	mQTL	chr7:99955544:C:G	rs2525548	ENSG00000201756	Y_RNA	cg11013060	Retina	2.3629e-09	0.000315	-0.331739	0.0521991	0.01678	-0.060442	SAME	0.0208295	0.0103358	chr7:99955544	TRUE	FALSE
AMD EUR	chr7:100393925:C:T	chr7:100393925:C:T	T	C	rs7803454	0.122218	0.122218	4.8e-09	99914532	100638465	723.933	453	mQTL	chr7:99955544:C:G	rs2525548	ENSG00000201774	Y_RNA	cg11013060	Retina	2.3629e-09	0.000315	-0.331739	0.0521991	0.01678	-0.060442	SAME	0.0208295	0.0103358	chr7:99955544	TRUE	FALSE
AMD EUR	chr7:100393925:C:T	chr7:100393925:C:T	T	C	rs7803454	0.122218	0.122218	4.8e-09	99914532	100638465	723.933	453	mQTL	chr7:99955544:C:G	rs2525548	ENSG00000201778	Y_RNA	cg11013060	Retina	2.3629e-09	0.000315	-0.331739	0.0521991	0.01678	-0.060442	SAME	0.0208295	0.0103358	chr7:99955544	TRUE	FALSE
AMD EUR	chr7:100393925:C:T	chr7:100393925:C:T	T	C	rs7803454	0.122218	0.122218	4.8e-09	99914532	100638465	723.933	453	mQTL	chr7:99955544:C:G	rs2525548	ENSG00000201786	Y_RNA	cg11013060	Retina	2.3629e-09	0.000315	-0.331739	0.0521991	0.01678	-0.060442	SAME	0.0208295	0.0103358	chr7:99955544	TRUE	FALSE
AMD EUR	chr7:100393925:C:T	chr7:100393925:C:T	T	C	rs7803454	0.122218	0.122218	4.8e-09	99914532	100638465	723.933	453	mQTL	chr7:99955544:C:G	rs2525548	ENSG00000201788	Y_RNA	cg11013060	Retina	2.3629e-09	0.000315	-0.331739	0.0521991	0.01678	-0.060442	SAME	0.0208295	0.0103358	chr7:99955544	TRUE	FALSE
AMD EUR	chr7:100393925:C:T	chr7:100393925:C:T	T	C	rs7803454	0.122218	0.122218	4.8e-09	99914532	100638465	723.933	453	mQTL	chr7:99955544:C:G	rs2525548	ENSG00000201800	Y_RNA	cg11013060	Retina	2.3629e-09	0.000315	-0.331739	0.0521991	0.01678	-0.060442	SAME	0.0208295	0.0103358	chr7:99955544	TRUE	FALSE
AMD EUR	chr7:100393925:C:T	chr7:100393925:C:T	T	C	rs7803454	0.122218	0.122218	4.8e-09	99914532	100638465	723.933	453	mQTL	chr7:99955544:C:G	rs2525548	ENSG00000201820	Y_RNA	cg11013060	Retina	2.3629e-09	0.000315	-0.331739	0.0521991	0.01678	-0.060442	SAME	0.0208295	0.0103358	chr7:99955544	TRUE	FALSE
AMD EUR	chr7:100393925:C:T	chr7:100393925:C:T	T	C	rs7803454	0.122218	0.122218	4.8e-09	99914532	100638465	723.933	453	mQTL	chr7:99955544:C:G	rs2525548	ENSG00000201830	Y_RNA	cg11013060	Retina	2.3629e-09	0.000315	-0.331739	0.0521991	0.01678	-0.060442	SAME	0.0208295	0.0103358	chr7:99955544	TRUE	FALSE
AMD EUR	chr7:100393925:C:T	chr7:100393925:C:T	T	C	rs7803454	0.122218	0.122218	4.8e-09	99914532	100638465	723.933	453	mQTL	chr7:99955544:C:G	rs2525548	ENSG00000201843	Y_RNA	cg11013060	Retina	2.3629e-09	0.000315	-0.331739	0.0521991	0.01678	-0.060442	SAME	0.0208295	0.0103358	chr7:99955544	TRUE	FALSE
AMD EUR	chr7:100393925:C:T	chr7:100393925:C:T	T	C	rs7803454	0.122218	0.122218	4.8e-09	99914532	100638465	723.933	453	mQTL	chr7:99955544:C:G	rs2525548	ENSG00000201850	Y_RNA	cg11013060	Retina	2.3629e-09	0.000315	-0.331739	0.0521991	0.01678	-0.060442	SAME	0.0208295	0.0103358	chr7:99955544	TRUE	FALSE
AMD EUR	chr7:100393925:C:T	chr7:100393925:C:T	T	C	rs7803454	0.122218	0.122218	4.8e-09	99914532	100638465	723.933	453	mQTL	chr7:99955544:C:G	rs2525548	ENSG00000201860	Y_RNA	cg11013060	Retina	2.3629e-09	0.000315	-0.331739	0.0521991	0.01678	-0.060442	SAME	0.0208295	0.0103358	chr7:99955544	TRUE	FALSE
AMD EUR	chr7:100393925:C:T	chr7:100393925:C:T	T	C	rs7803454	0.122218	0.122218	4.8e-09	99914532	100638465	723.933	453	mQTL	chr7:99955544:C:G	rs2525548	ENSG00000201867	Y_RNA	cg11013060	Retina	2.3629e-09	0.000315	-0.331739	0.0521991	0.01678	-0.060442	SAME	0.0208295	0.0103358	chr7:99955544	TRUE	FALSE
AMD EUR	chr7:100393925:C:T	chr7:100393925:C:T	T	C	rs7803454	0.122218	0.122218	4.8e-09	99914532	100638465	723.933	453	mQTL	chr7:99955544:C:G	rs2525548	ENSG00000201868	Y_RNA	cg11013060	Retina	2.3629e-09	0.000315	-0.331739	0.0521991	0.01678	-0.060442	SAME	0.0208295	0.0103358	chr7:99955544	TRUE	FALSE
AMD EUR	chr7:100393925:C:T	chr7:100393925:C:T	T	C	rs7803454	0.122218	0.122218	4.8e-09	99914532	100638465	723.933	453	mQTL	chr7:99955544:C:G	rs2525548	ENSG00000201881	Y_RNA	cg11013060	Retina	2.3629e-09	0.000315	-0.331739	0.0521991	0.01678	-0.060442	SAME	0.0208295	0.0103358	chr7:99955544	TRUE	FALSE
AMD EUR	chr7:100393925:C:T	chr7:100393925:C:T	T	C	rs7803454	0.122218	0.122218	4.8e-09	99914532	100638465	723.933	453	mQTL	chr7:99955544:C:G	rs2525548	ENSG00000201884	Y_RNA	cg11013060	Retina	2.3629e-09	0.000315	-0.331739	0.0521991	0.01678	-0.060442	SAME	0.0208295	0.0103358	chr7:99955544	TRUE	FALSE
AMD EUR	chr7:100393925:C:T	chr7:100393925:C:T	T	C	rs7803454	0.122218	0.122218	4.8e-09	99914532	100638465	723.933	453	mQTL	chr7:99955544:C:G	rs2525548	ENSG00000201885	Y_RNA	cg11013060	Retina	2.3629e-09	0.000315	-0.331739	0.0521991	0.01678	-0.060442	SAME	0.0208295	0.0103358	chr7:99955544	TRUE	FALSE
AMD EUR	chr7:100393925:C:T	chr7:100393925:C:T	T	C	rs7803454	0.122218	0.122218	4.8e-09	99914532	100638465	723.933	453	mQTL	chr7:99955544:C:G	rs2525548	ENSG00000201892	Y_RNA	cg11013060	Retina	2.3629e-09	0.000315	-0.331739	0.0521991	0.01678	-0.060442	SAME	0.0208295	0.0103358	chr7:99955544	TRUE	FALSE
AMD EUR	chr7:100393925:C:T	chr7:100393925:C:T	T	C	rs7803454	0.122218	0.122218	4.8e-09	99914532	100638465	723.933	453	mQTL	chr7:99955544:C:G	rs2525548	ENSG00000201913	Y_RNA	cg11013060	Retina	2.3629e-09	0.000315	-0.331739	0.0521991	0.01678	-0.060442	SAME	0.0208295	0.0103358	chr7:99955544	TRUE	FALSE
AMD EUR	chr7:100393925:C:T	chr7:100393925:C:T	T	C	rs7803454	0.122218	0.122218	4.8e-09	99914532	100638465	723.933	453	mQTL	chr7:99955544:C:G	rs2525548	ENSG00000201916	Y_RNA	cg11013060	Retina	2.3629e-09	0.000315	-0.331739	0.0521991	0.01678	-0.060442	SAME	0.0208295	0.0103358	chr7:99955544	TRUE	FALSE
AMD EUR	chr7:100393925:C:T	chr7:100393925:C:T	T	C	rs7803454	0.122218	0.122218	4.8e-09	99914532	100638465	723.933	453	mQTL	chr7:99955544:C:G	rs2525548	ENSG00000201933	Y_RNA	cg11013060	Retina	2.3629e-09	0.000315	-0.331739	0.0521991	0.01678	-0.060442	SAME	0.0208295	0.0103358	chr7:99955544	TRUE	FALSE
AMD EUR	chr7:100393925:C:T	chr7:100393925:C:T	T	C	rs7803454	0.122218	0.122218	4.8e-09	99914532	100638465	723.933	453	mQTL	chr7:99955544:C:G	rs2525548	ENSG00000201938	Y_RNA	cg11013060	Retina	2.3629e-09	0.000315	-0.331739	0.0521991	0.01678	-0.060442	SAME	0.0208295	0.0103358	chr7:99955544	TRUE	FALSE
AMD EUR	chr7:100393925:C:T	chr7:100393925:C:T	T	C	rs7803454	0.122218	0.122218	4.8e-09	99914532	100638465	723.933	453	mQTL	chr7:99955544:C:G	rs2525548	ENSG00000201959	Y_RNA	cg11013060	Retina	2.3629e-09	0.000315	-0.331739	0.0521991	0.01678	-0.060442	SAME	0.0208295	0.0103358	chr7:99955544	TRUE	FALSE
AMD EUR	chr7:100393925:C:T	chr7:100393925:C:T	T	C	rs7803454	0.122218	0.122218	4.8e-09	99914532	100638465	723.933	453	mQTL	chr7:99955544:C:G	rs2525548	ENSG00000201965	Y_RNA	cg11013060	Retina	2.3629e-09	0.000315	-0.331739	0.0521991	0.01678	-0.060442	SAME	0.0208295	0.0103358	chr7:99955544	TRUE	FALSE
AMD EUR	chr7:100393925:C:T	chr7:100393925:C:T	T	C	rs7803454	0.122218	0.122218	4.8e-09	99914532	100638465	723.933	453	mQTL	chr7:99955544:C:G	rs2525548	ENSG00000201984	Y_RNA	cg11013060	Retina	2.3629e-09	0.000315	-0.331739	0.0521991	0.01678	-0.060442	SAME	0.0208295	0.0103358	chr7:99955544	TRUE	FALSE
AMD EUR	chr7:100393925:C:T	chr7:100393925:C:T	T	C	rs7803454	0.122218	0.122218	4.8e-09	99914532	100638465	723.933	453	mQTL	chr7:99955544:C:G	rs2525548	ENSG00000201987	Y_RNA	cg11013060	Retina	2.3629e-09	0.000315	-0.331739	0.0521991	0.01678	-0.060442	SAME	0.0208295	0.0103358	chr7:99955544	TRUE	FALSE
AMD EUR	chr7:100393925:C:T	chr7:100393925:C:T	T	C	rs7803454	0.122218	0.122218	4.8e-09	99914532	100638465	723.933	453	mQTL	chr7:99955544:C:G	rs2525548	ENSG00000201988	Y_RNA	cg11013060	Retina	2.3629e-09	0.000315	-0.331739	0.0521991	0.01678	-0.060442	SAME	0.0208295	0.0103358	chr7:99955544	TRUE	FALSE
AMD EUR	chr7:100393925:C:T	chr7:100393925:C:T	T	C	rs7803454	0.122218	0.122218	4.8e-09	99914532	100638465	723.933	453	mQTL	chr7:99955544:C:G	rs2525548	ENSG00000201990	Y_RNA	cg11013060	Retina	2.3629e-09	0.000315	-0.331739	0.0521991	0.01678	-0.060442	SAME	0.0208295	0.0103358	chr7:99955544	TRUE	FALSE
AMD EUR	chr7:100393925:C:T	chr7:100393925:C:T	T	C	rs7803454	0.122218	0.122218	4.8e-09	99914532	100638465	723.933	453	mQTL	chr7:99955544:C:G	rs2525548	ENSG00000202001	Y_RNA	cg11013060	Retina	2.3629e-09	0.000315	-0.331739	0.0521991	0.01678	-0.060442	SAME	0.0208295	0.0103358	chr7:99955544	TRUE	FALSE
AMD EUR	chr7:100393925:C:T	chr7:100393925:C:T	T	C	rs7803454	0.122218	0.122218	4.8e-09	99914532	100638465	723.933	453	mQTL	chr7:99955544:C:G	rs2525548	ENSG00000202008	Y_RNA	cg11013060	Retina	2.3629e-09	0.000315	-0.331739	0.0521991	0.01678	-0.060442	SAME	0.0208295	0.0103358	chr7:99955544	TRUE	FALSE
AMD EUR	chr7:100393925:C:T	chr7:100393925:C:T	T	C	rs7803454	0.122218	0.122218	4.8e-09	99914532	100638465	723.933	453	mQTL	chr7:99955544:C:G	rs2525548	ENSG00000202014	Y_RNA	cg11013060	Retina	2.3629e-09	0.000315	-0.331739	0.0521991	0.01678	-0.060442	SAME	0.0208295	0.0103358	chr7:99955544	TRUE	FALSE
AMD EUR	chr7:100393925:C:T	chr7:100393925:C:T	T	C	rs7803454	0.122218	0.122218	4.8e-09	99914532	100638465	723.933	453	mQTL	chr7:99955544:C:G	rs2525548	ENSG00000202019	Y_RNA	cg11013060	Retina	2.3629e-09	0.000315	-0.331739	0.0521991	0.01678	-0.060442	SAME	0.0208295	0.0103358	chr7:99955544	TRUE	FALSE
AMD EUR	chr7:100393925:C:T	chr7:100393925:C:T	T	C	rs7803454	0.122218	0.122218	4.8e-09	99914532	100638465	723.933	453	mQTL	chr7:99955544:C:G	rs2525548	ENSG00000202021	Y_RNA	cg11013060	Retina	2.3629e-09	0.000315	-0.331739	0.0521991	0.01678	-0.060442	SAME	0.0208295	0.0103358	chr7:99955544	TRUE	FALSE
AMD EUR	chr7:100393925:C:T	chr7:100393925:C:T	T	C	rs7803454	0.122218	0.122218	4.8e-09	99914532	100638465	723.933	453	mQTL	chr7:99955544:C:G	rs2525548	ENSG00000202027	Y_RNA	cg11013060	Retina	2.3629e-09	0.000315	-0.331739	0.0521991	0.01678	-0.060442	SAME	0.0208295	0.0103358	chr7:99955544	TRUE	FALSE
AMD EUR	chr7:100393925:C:T	chr7:100393925:C:T	T	C	rs7803454	0.122218	0.122218	4.8e-09	99914532	100638465	723.933	453	mQTL	chr7:99955544:C:G	rs2525548	ENSG00000202035	Y_RNA	cg11013060	Retina	2.3629e-09	0.000315	-0.331739	0.0521991	0.01678	-0.060442	SAME	0.0208295	0.0103358	chr7:99955544	TRUE	FALSE
AMD EUR	chr7:100393925:C:T	chr7:100393925:C:T	T	C	rs7803454	0.122218	0.122218	4.8e-09	99914532	100638465	723.933	453	mQTL	chr7:99955544:C:G	rs2525548	ENSG00000202041	Y_RNA	cg11013060	Retina	2.3629e-09	0.000315	-0.331739	0.0521991	0.01678	-0.060442	SAME	0.0208295	0.0103358	chr7:99955544	TRUE	FALSE
AMD EUR	chr7:100393925:C:T	chr7:100393925:C:T	T	C	rs7803454	0.122218	0.122218	4.8e-09	99914532	100638465	723.933	453	mQTL	chr7:99955544:C:G	rs2525548	ENSG00000202046	Y_RNA	cg11013060	Retina	2.3629e-09	0.000315	-0.331739	0.0521991	0.01678	-0.060442	SAME	0.0208295	0.0103358	chr7:99955544	TRUE	FALSE
AMD EUR	chr7:100393925:C:T	chr7:100393925:C:T	T	C	rs7803454	0.122218	0.122218	4.8e-09	99914532	100638465	723.933	453	mQTL	chr7:99955544:C:G	rs2525548	ENSG00000202071	Y_RNA	cg11013060	Retina	2.3629e-09	0.000315	-0.331739	0.0521991	0.01678	-0.060442	SAME	0.0208295	0.0103358	chr7:99955544	TRUE	FALSE
AMD EUR	chr7:100393925:C:T	chr7:100393925:C:T	T	C	rs7803454	0.122218	0.122218	4.8e-09	99914532	100638465	723.933	453	mQTL	chr7:99955544:C:G	rs2525548	ENSG00000202078	Y_RNA	cg11013060	Retina	2.3629e-09	0.000315	-0.331739	0.0521991	0.01678	-0.060442	SAME	0.0208295	0.0103358	chr7:99955544	TRUE	FALSE
[truncated: 431 more rows]
