# Supplementary material for: QTL mapping of human retina DNA methylation identifies 87 gene-epigenome interactions in age-related macular degeneration
Source: Research Square preprint supplement (doi:10.21203/rs.3.rs-3011096/v1), 2023-06-16
Supplement: Supplementary file 43 [file Supplementary_Table22.xlsx]

## Sheet: Sheet1
Trait	Gene_ID	best.snp.GE	PPA.GE	chr	Gene_symbol	Biotype	Loci	Identified in Ratnapriya et. al	Identified in Orozco et. al	Identified in Strunz et. al
AMD	ENSG00000163382	rs58877280	0.802637	chr1	NAXE	protein_coding	-	No	No	No
AMD	ENSG00000163013	rs34946214	0.800008	chr2	FBXO41	protein_coding	-	No	No	No
AMD	ENSG00000240344	rs57210488	0.800714	chr2	PPIL3	protein_coding	-	No	No	No
AMD	ENSG00000240344	rs115353050	0.800922	chr2	PPIL3	protein_coding	-	No	No	No
AMD	ENSG00000240344	rs6712963	0.802188	chr2	PPIL3	protein_coding	-	No	No	No
AMD	ENSG00000240344	rs10165493	0.825809	chr2	PPIL3	protein_coding	-	No	No	No
AMD	ENSG00000182836	rs111340452	0.805805	chr5	PLCXD3	protein_coding	-	No	No	No
AMD	ENSG00000168394	rs148420656	0.800196	chr6	TAP1	protein_coding	-	No	No	No
AMD	ENSG00000206344	rs2158287	0.800706	chr6	HCG27	protein_coding	-	No	No	No
AMD	ENSG00000204389	rs114815710	0.80317	chr6	HSPA1A	protein_coding	-	No	No	No
AMD	ENSG00000204388	rs114815710	0.830059	chr6	HSPA1B	protein_coding	-	No	No	No
AMD	ENSG00000204386	rs241426	0.836916	chr6	NEU1	protein_coding	-	No	No	No
AMD	ENSG00000213760	rs113792725	0.84407	chr6	ATP6V1G2	protein_coding	-	No	No	No
AMD	ENSG00000204536	rs2844786	0.847604	chr6	CCHCR1	protein_coding	-	No	No	No
AMD	ENSG00000204525	rs143654430	0.858574	chr6	HLA-C	protein_coding	-	No	No	No
AMD	ENSG00000213760	rs3094101	0.922554	chr6	ATP6V1G2	protein_coding	-	No	No	No
AMD	ENSG00000166925	rs11771241	0.800963	chr7	TSC22D4	protein_coding	PILRB/PILRA	No	No	No
AMD	ENSG00000160862	rs34130487	0.801124	chr7	AZGP1	protein_coding	PILRB/PILRA	No	No	No
AMD	ENSG00000146833	rs6974286	0.80123	chr7	TRIM4	protein_coding	PILRB/PILRA	No	No	No
AMD	ENSG00000166925	rs7783550	0.801255	chr7	TSC22D4	protein_coding	PILRB/PILRA	No	No	No
AMD	ENSG00000221838	rs34130487	0.801257	chr7	AP4M1	protein_coding	PILRB/PILRA	No	No	No
AMD	ENSG00000166997	rs72615157	0.801495	chr7	CNPY4	protein_coding	PILRB/PILRA	No	No	No
AMD	ENSG00000166925	rs11766917	0.805427	chr7	TSC22D4	protein_coding	PILRB/PILRA	No	No	No
AMD	ENSG00000166925	rs111689538	0.813802	chr7	TSC22D4	protein_coding	PILRB/PILRA	No	No	No
AMD	ENSG00000166925	rs7803454	0.81826	chr7	TSC22D4	protein_coding	PILRB/PILRA	No	No	No
AMD	ENSG00000168090	rs11772580	0.832158	chr7	COPS6	protein_coding	PILRB/PILRA	No	No	No
AMD	ENSG00000166925	rs142473518	0.840965	chr7	TSC22D4	protein_coding	PILRB/PILRA	Yes	No	No
AMD	ENSG00000186862	rs77484072	0.800402	chr10	PDZD7	protein_coding	-	No	No	No
AMD	ENSG00000254929	rs11101268	0.85987	chr10	RP11-144G6.12	processed_transcript	-	No	No	No
AMD	ENSG00000255532	rs117165313	0.800183	chr11	CTD-2026G22.1	transcribed_unprocessed_pseudogene	-	No	No	No
AMD	ENSG00000255532	rs117784390	0.800269	chr11	CTD-2026G22.1	transcribed_unprocessed_pseudogene	-	No	No	No
AMD	ENSG00000170581	rs73114980	0.817336	chr12	STAT2	protein_coding	-	No	No	No
AMD	ENSG00000128944	rs72735670	0.800065	chr15	KNSTRN	protein_coding	-	No	No	No
AMD	ENSG00000166664	rs1905385	0.800077	chr15	CHRFAM7A	protein_coding	-	No	No	No
AMD	ENSG00000269930	rs1905385	0.800163	chr15	RP11-932O9.9	lincRNA	-	No	No	No
AMD	ENSG00000166912	rs6493454	0.801828	chr15	MTMR10	protein_coding	-	No	No	No
AMD	ENSG00000178802	rs11072507	0.802562	chr15	MPI	protein_coding	-	No	No	No
AMD	ENSG00000269930	rs34678577	0.80541	chr15	RP11-932O9.9	lincRNA	-	No	No	No
AMD	ENSG00000178802	rs2960192	0.847917	chr15	MPI	protein_coding	-	No	No	No
AMD	ENSG00000007216	rs11080055	0.804358	chr17	SLC13A2	protein_coding	TMEM97/VTN	Yes	No	No
AMD	ENSG00000007216	rs614877	0.827372	chr17	SLC13A2	protein_coding	TMEM97/VTN	No	No	No
AMD	ENSG00000007216	rs241777	0.853801	chr17	SLC13A2	protein_coding	TMEM97/VTN	No	No	No
AMD	ENSG00000278917	rs41290120	0.800573	chr19	RP11-15A1.4	TEC	-	No	No	No
AMD	ENSG00000065268	rs3087680	0.801174	chr19	WDR18	protein_coding	CNN2	No	No	No
AMD	ENSG00000065268	rs113337161	0.801186	chr19	WDR18	protein_coding	CNN2	No	No	No
AMD	ENSG00000064601	rs77000636	0.801899	chr20	CTSA	protein_coding	-	No	No	No
AMD	ENSG00000124116	rs6065912	0.821305	chr20	WFDC3	protein_coding	-	No	No	No
