# Supplementary material for: QTL mapping of human retina DNA methylation identifies 87 gene-epigenome interactions in age-related macular degeneration
Source: Research Square preprint supplement (doi:10.21203/rs.3.rs-3011096/v1), 2023-06-16
Supplement: Supplementary file 55 [file Supplementary_Table27.xlsx]

## Sheet: Sheet1
CpG	chr	CpG_start	CpG_end	snp	hg38_pos_start	hg38_pos_end	Rank	Backward_nom_pval	Backward_slope	Backward_slope_se	TSS-variant_Distance	Type
cg23812948	chr1	1095277	1095276	rs36161240:1043829:A:G	1108449	1108449	0	8.36564e-07	0.161011	0.0313131	7912	Distal mGene
cg00918900	chr1	1121956	1121955	rs80109121:1044319:C:T	1108939	1108939	0	1.42149e-07	0.19081	0.0345366	7422	Distal non-mGene
cg17132079	chr1	1358761	1358760	rs1810745:1257593:A:G	1322213	1322213	0	9.80233e-09	0.306763	0.0505023	9101	Distal non-mGene
cg18550476	chr1	1358974	1358973	rs1810745:1257593:A:G	1322213	1322213	0	2.41654e-07	0.261784	0.0483709	9101	Distal non-mGene
cg15827003	chr1	1891474	1891473	GIANT-BMI-Euro-Sex-Combined_chr1_1723031	1791592	1791592	0	6.55571e-08	0.216549	0.0380776	99525	Distal mGene
cg08967668	chr1	1935888	1935887	rs2803325:1872412:C:T	1940973	1940973	0	2.35501e-16	0.264418	0.0286395	109097	Distal non-mGene
cg03396347	chr1	1944365	1944364	rs2803332:1875513:T:C	1944074	1944074	0	7.75108e-26	-0.504581	0.0394018	105996	Distal non-mGene
cg17747265	chr1	1944342	1944341	rs2803333:1875530:G:C	1944091	1944091	0	2.22017e-26	-0.596395	0.0458438	105979	Distal non-mGene
cg01428437	chr1	1920726	1920725	rs2803341:1878628:C:T	1947189	1947189	0	1.23729e-08	0.126787	0.0210346	102881	Distal non-mGene
cg12035532	chr1	1955327	1955326	rs151085750:1884029:A:AAAAG	1952590	1952590	0	1.08224e-08	-0.26396	0.0435979	66734	Distal non-mGene
cg13111532	chr1	1955105	1955104	rs74473635:1886204:A:AGAGT	1954765	1954765	1	5.23083e-08	-0.679084	0.118435	64559	Distal non-mGene
cg13111532	chr1	1955105	1955104	exm4806	1955580	1955580	0	3.75689e-09	-0.952269	0.152012	94490	Distal non-mGene
cg10096055	chr1	1919727	1919726	rs36018191:1889356:C:A	1957917	1957917	0	7.76498e-11	0.384179	0.0548429	92153	Distal non-mGene
cg03844268	chr1	3267624	3267623	rs71630976:2322726:G:A	2391287	2391287	0	3.43467e-07	0.296514	0.0555643	-178567	Distal non-mGene
cg10238603	chr1	2406437	2406436	rs4648838:2329212:G:A	2397773	2397773	0	8.65024e-10	-0.6587	0.100568	-347303	Distal non-mGene
cg04339679	chr1	2393149	2393148	rs2494597:2343194:T:C	2411755	2411755	0	1.2086e-08	0.298685	0.0495145	-20048	Distal mGene
cg12656307	chr1	2418296	2418295	rs10910070:2350912:G:A	2419473	2419473	0	3.6371e-07	-0.0947606	0.0177986	6507	Distal non-mGene
cg11596239	chr1	2418621	2418620	rs3935659	2420260	2420260	0	1.20498e-06	0.111805	0.022092	5720	Distal non-mGene
cg20895887	chr1	2981160	2981159	rs10797373:2904056:G:A	2987492	2987492	0	1.6794e-15	-0.903211	0.101472	81676	Distal non-mGene
cg03486816	chr1	2981188	2981187	rs10797373:2904056:G:A	2987492	2987492	0	1.09879e-13	-0.735798	0.08992	81676	Distal non-mGene
cg02481237	chr1	3154040	3154039	rs1736523:3079885:C:G	3163321	3163321	0	8.80771e-08	-0.157477	0.0279934	-94153	Distal mGene
cg17435683	chr1	3314046	3314045	rs79749978:3234448:T:C	3317884	3317884	0	8.43563e-08	-0.412387	0.0731895	-248716	Distal mGene
cg10013316	chr1	3611064	3611063	rs60020855:3528292:GC:G	3611728	3611729	0	2.14788e-08	-0.11811	0.019964	-233	Promoter mGene
cg14200305	chr1	3645559	3645558	rs137965653:3546264:CCGGG:C	3629700	3629704	0	2.72035e-09	0.172484	0.0272584	-142454	Distal non-mGene
cg24643429	chr1	3645866	3645865	rs137965653:3546264:CCGGG:C	3629700	3629704	0	1.67318e-07	0.203564	0.0370767	-142454	Distal non-mGene
cg06178315	chr1	3858295	3858294	rs12131756:3778238:C:T	3861674	3861674	0	5.53592e-08	-0.257738	0.0450426	2130799	Distal non-mGene
cg00489772	chr1	3858515	3858514	rs12131756:3778238:C:T	3861674	3861674	0	1.41607e-12	-0.322172	0.0416636	2130799	Distal non-mGene
cg05565139	chr1	3900276	3900275	rs34938659:3823206:AT:A	3906642	3906643	0	1.00941e-26	0.46538	0.0354237	748090	Distal non-mGene
cg25762395	chr1	3900279	3900278	rs34938659:3823206:AT:A	3906642	3906643	0	9.09195e-29	0.57407	0.041281	748090	Distal non-mGene
cg06398147	chr1	3900422	3900421	rs114272920:3831240:C:T	3914676	3914676	0	9.51572e-16	0.196989	0.0218942	2077797	Distal non-mGene
cg12590793	chr1	5832083	5832082	rs10864638:5882579:G:A	5822519	5822519	0	7.1917e-21	0.380903	0.0347913	-1167787	Distal non-mGene
cg14559147	chr1	5860404	5860403	rs10864451:5918002:C:T	5857942	5857942	0	1.45912e-09	-0.254389	0.0394463	-1203210	Distal non-mGene
cg16993213	chr1	5991299	5991298	rs11120772:5973775:G:A	5913715	5913715	0	3.12874e-18	0.278627	0.0279969	-1258983	Distal non-mGene
cg21211271	chr1	6205012	6205011	rs4908539:6262880:G:A	6202820	6202820	0	2.50583e-26	0.713916	0.0549606	33152	Distal non-mGene
cg15584788	chr1	6205241	6205240	rs4908864	6203294	6203294	0	7.77358e-33	0.990157	0.0640684	32678	Distal non-mGene
cg12396368	chr1	6234791	6234790	rs12084175:6296621:A:T	6236561	6236561	0	1.98552e-08	0.266359	0.0449011	-245095	Distal non-mGene
cg04055049	chr1	6261494	6261493	rs6703384:6316217:A:G	6256157	6256157	0	1.27217e-06	-0.117412	0.0232556	138234	Distal non-mGene
cg14566624	chr1	6261523	6261522	rs2057006:6316884:G:C	6256824	6256824	0	1.77747e-07	-0.1407	0.0256868	137567	Distal non-mGene
cg19056927	chr1	6385850	6385849	rs114200864:6334301:G:A	6274241	6274241	0	2.996e-14	0.591186	0.0703109	120150	Distal mGene
cg06407172	chr1	6385857	6385856	rs114200864:6334301:G:A	6274241	6274241	0	1.44761e-12	0.544191	0.0704109	120150	Distal mGene
cg25855436	chr1	6385916	6385915	rs114200864:6334301:G:A	6274241	6274241	0	4.09516e-08	1.99428	0.344774	120150	Distal mGene
cg18953405	chr1	6424761	6424760	rs113844756:6497658:C:T	6437598	6437598	0	7.78584e-07	0.195065	0.0378193	-12928	Distal non-mGene
cg00297432	chr1	6424725	6424724	rs77829738:6498162:G:T	6438102	6438102	0	6.15957e-07	0.119675	0.0229731	-13432	Distal non-mGene
cg12905865	chr1	6485755	6485754	rs145084014:6541460:G:T	6481400	6481400	0	5.11181e-07	0.183158	0.0348864	-237208	Distal non-mGene
cg05781512	chr1	6111621	6111620	rs78116825:6848799:C:T	6788739	6788739	0	2.19627e-07	-0.573786	0.105622	-3415	Distal non-mGene
cg09696653	chr1	7705294	7705293	rs12119962:7742501:C:T	7682441	7682441	0	3.58071e-17	0.218173	0.0228509	-897117	Distal mGene
cg25763306	chr1	7681157	7681156	rs12747548:7744856:T:C	7684796	7684796	0	1.50593e-31	0.888834	0.0594085	-899472	Distal mGene
cg19795711	chr1	8168324	8168323	rs149997714:7761132:T:C	7701072	7701072	0	1.89827e-07	0.481085	0.0880541	-915748	Distal non-mGene
cg27642159	chr1	6806897	6806896	rs142501097:7780245:CT:C	7720185	7720186	0	8.93038e-07	-0.539662	0.105248	-934861	Distal mGene
cg23228279	chr1	7697315	7697314	rs34351762:7782533:C:CAGTT	7722473	7722473	0	1.14391e-08	-0.116776	0.0193232	-937149	Distal mGene
cg01444397	chr1	7784391	7784390	rs2071987	7773966	7773966	0	5.96618e-24	0.300299	0.0248161	-988642	Distal non-mGene
cg26816564	chr1	7770993	7770992	rs4908694:7850898:C:T	7790838	7790838	0	5.241e-26	0.495104	0.0384708	-6518	Distal non-mGene
cg08764927	chr1	7784836	7784835	1:7856379:C:CT	7796319	7796319	0	4.1956e-07	0.168759	0.0318829	-1010995	Distal non-mGene
cg00864860	chr1	7847937	7847936	rs12092614:7865710:C:T	7805650	7805650	0	9.66439e-07	0.204674	0.0400536	-21330	Distal non-mGene
cg23631229	chr1	7902791	7902790	rs12059274:7955286:A:G	7895226	7895226	0	6.56624e-11	0.673192	0.0956753	-1109902	Distal non-mGene
cg08027640	chr1	7961886	7961885	rs7517357:8025275:C:T	7965215	7965215	0	4.3879e-19	0.932183	0.0907174	352611	Distal non-mGene
cg19243717	chr1	8302596	8302595	rs2120459:8360487:A:G	8300427	8300427	0	5.40739e-09	0.162917	0.0263085	-346136	Distal non-mGene
cg24453604	chr1	8302354	8302353	rs35288526:8361620:T:C	8301560	8301560	0	4.04944e-07	0.115096	0.0217131	-347269	Distal non-mGene
cg00055811	chr1	8482953	8482952	rs61785830:8382403:C:G	8322343	8322343	0	5.14654e-07	-0.168905	0.0321806	-368052	Distal non-mGene
cg14413262	chr1	8323987	8323986	rs10864349:8392610:T:C	8332550	8332550	0	4.0969e-08	0.183073	0.0316505	-306242	Distal non-mGene
cg03281911	chr1	8438685	8438684	rs880320:8427002:C:A	8366942	8366942	0	3.63884e-07	-0.180743	0.0339491	-412651	Distal non-mGene
cg19295092	chr1	8031676	8031675	rs11589090:8525615:C:T	8465555	8465555	0	4.50193e-07	0.150446	0.0285055	352088	Distal non-mGene
cg17029193	chr1	8450548	8450547	rs4581300:8610505:T:G	8550446	8550446	0	1.24633e-08	-0.180072	0.029882	267197	Distal mGene
cg25722041	chr1	8563415	8563414	rs113605276:8623490:C:T	8563431	8563431	0	6.77875e-11	0.374244	0.0532329	254212	Distal mGene
cg21855467	chr1	8317363	8317362	rs139529766:8906286:C:T	8846227	8846227	0	7.39282e-07	0.322854	0.0624566	-891936	Distal non-mGene
cg13693328	chr1	9196283	9196282	rs4908823	9196141	9196141	0	3.73885e-18	0.243522	0.0245421	-66971	Distal non-mGene
cg18783781	chr1	9539009	9539008	rs181715706:9595643:T:C	9535584	9535584	0	5.32571e-10	0.242314	0.0364784	3898	Distal mGene
cg02425407	chr1	9842930	9842929	rs12725898:9903548:G:T	9843490	9843490	0	1.6915e-07	0.0929231	0.016932	-18964	Distal non-mGene
cg08737543	chr1	10058709	10058708	rs61782927:10214089:A:G	10154031	10154031	0	2.823e-22	-1.59697	0.139169	-121199	Distal mGene
cg10582871	chr1	10665276	10665275	rs111473432:10288104:G:A	10228046	10228046	0	2.07632e-08	-0.34555	0.0583399	-17241	Distal non-mGene
cg19092837	chr1	10211667	10211666	rs12142043:10454948:G:A	10394891	10394891	0	3.59816e-11	0.169281	0.0236844	-451463	Distal non-mGene
cg25013184	chr1	10427897	10427896	rs666583:10485177:C:T	10425120	10425120	0	8.95672e-14	0.209766	0.0255239	-514784	Distal non-mGene
cg26419962	chr1	10449626	10449625	rs544289:10499236:A:G	10439179	10439179	0	5.91098e-07	0.142858	0.0273759	-528843	Distal non-mGene
cg06542282	chr1	10540166	10540165	rs34612970:10541880:CT:C	10481823	10481824	0	7.66712e-08	0.163881	0.0289827	500214	Distal non-mGene
cg07555102	chr1	10636010	10636009	rs34612970:10541880:CT:C	10481823	10481824	0	5.28092e-09	0.160958	0.0259724	500214	Distal non-mGene
cg23975251	chr1	10544390	10544389	rs202087283:10563364:G:A	10503307	10503307	0	1.83634e-17	-0.422507	0.0437431	478730	Distal non-mGene
cg23863608	chr1	10553062	10553061	rs202087283:10563364:G:A	10503307	10503307	0	1.86231e-25	-0.343324	0.0271111	478730	Distal non-mGene
cg27571230	chr1	10497202	10497201	rs2847344:10564675:G:A	10504618	10504618	0	5.51724e-19	-0.307562	0.0300411	477419	Distal non-mGene
cg20329303	chr1	10635962	10635961	NHGRI_notinECorHUNT_chr1_10566215	10506158	10506158	0	9.23563e-07	-0.132858	0.0259484	290492	Distal non-mGene
cg25667751	chr1	10507630	10507629	rs2506879:10566668:A:G	10506611	10506611	0	5.19372e-21	0.682677	0.0620542	290039	Distal non-mGene
cg12806121	chr1	10541333	10541332	rs60354536:10569000:C:CT	10508943	10508943	0	1.41922e-21	-0.427167	0.0380973	287707	Distal non-mGene
cg12830684	chr1	10553484	10553483	rs60354536:10569000:C:CT	10508943	10508943	0	1.97553e-23	-0.577583	0.0485089	287707	Distal non-mGene
cg05454781	chr1	10591288	10591287	rs60354536:10569000:C:CT	10508943	10508943	0	4.12035e-19	-0.252622	0.0245597	287707	Distal non-mGene
cg01834541	chr1	10591745	10591744	rs60354536:10569000:C:CT	10508943	10508943	0	7.44014e-31	-0.575182	0.0391363	287707	Distal non-mGene
cg12944311	chr1	10599850	10599849	rs60354536:10569000:C:CT	10508943	10508943	0	4.1759e-14	-0.319009	0.038201	287707	Distal non-mGene
cg09319435	chr1	10626219	10626218	rs60354536:10569000:C:CT	10508943	10508943	0	1.4766e-20	-0.265763	0.0245374	287707	Distal non-mGene
cg06080068	chr1	10507743	10507742	rs3215946:10574185:GA:G	10514128	10514129	0	5.9613e-20	0.291277	0.0274714	282522	Distal non-mGene
cg17425144	chr1	10507507	10507506	rs7419116:10578606:G:A	10518549	10518549	0	3.66939e-24	0.255009	0.020937	463488	Distal non-mGene
cg04585221	chr1	10613162	10613161	rs1411402:10579545:G:T	10519488	10519488	0	2.38437e-19	-0.44145	0.042546	462549	Distal non-mGene
cg21931713	chr1	10623772	10623771	rs1411402:10579545:G:T	10519488	10519488	0	1.99361e-08	-0.132441	0.0223292	462549	Distal non-mGene
cg24294013	chr1	10541777	10541776	rs2483677:10580891:C:T	10520834	10520834	0	1.20255e-18	-0.429847	0.0425178	461203	Distal non-mGene
cg01063935	chr1	10556029	10556028	rs2483677:10580891:C:T	10520834	10520834	0	8.85851e-19	-0.384781	0.0378716	461203	Distal non-mGene
cg23987244	chr1	10594962	10594961	rs2483677:10580891:C:T	10520834	10520834	0	2.71976e-22	-0.490319	0.0427068	461203	Distal non-mGene
cg15554126	chr1	10630387	10630386	rs2483677:10580891:C:T	10520834	10520834	0	4.64727e-18	-0.269839	0.0272932	461203	Distal non-mGene
cg07357157	chr1	10630532	10630531	rs2483677:10580891:C:T	10520834	10520834	0	4.27838e-19	-0.22167	0.0215636	461203	Distal non-mGene
cg23072051	chr1	10605459	10605458	rs2506885:10581051:A:T	10520994	10520994	0	7.18122e-11	-0.180915	0.0257728	461043	Distal non-mGene
cg00391821	chr1	10506831	10506830	rs7548453:10589836:A:G	10529779	10529779	0	1.13719e-06	0.109046	0.0214918	452258	Distal non-mGene
cg04607379	chr1	10616778	10616777	rs2026792:10594790:A:G	10534733	10534733	0	5.43201e-20	-0.360861	0.0339854	-62445	Distal mGene
cg26362368	chr1	10615567	10615566	rs2506892:10598216:G:A	10538159	10538159	0	1.32246e-22	-0.527352	0.0454686	258491	Distal non-mGene
cg27182133	chr1	10598091	10598090	rs2150038:10609973:G:T	10549916	10549916	0	1.41743e-10	-0.203456	0.0295171	-77628	Distal mGene
cg09165170	chr1	10541523	10541522	rs284305:10682244:C:T	10622187	10622187	1	9.41662e-08	1.60762	0.286487	-149899	Distal mGene
cg22608619	chr1	10643175	10643174	rs146039805:10703203:G:GC	10643146	10643146	0	1.09419e-19	0.427391	0.0406903	153504	Distal mGene
cg18878351	chr1	10649287	10649286	rs1796630:10711278:C:T	10651221	10651221	0	3.33844e-09	-0.212258	0.033758	145429	Distal mGene
cg07643626	chr1	10785805	10785804	rs6660242:10845840:G:A	10785783	10785783	0	1.2231e-07	-0.174589	0.0314201	10867	Distal mGene
cg04944659	chr1	10831475	10831474	rs616724:10894981:T:G	10834924	10834924	0	1.27037e-12	0.315888	0.0407491	-362636	Distal non-mGene
cg11868231	chr1	10861302	10861301	rs1280993:10921228:T:C	10861171	10861171	0	4.48768e-12	0.424765	0.0564379	-388883	Distal non-mGene
cg22487516	chr1	10861395	10861394	rs1280993:10921228:T:C	10861171	10861171	0	8.17668e-12	0.420462	0.0566819	-388883	Distal non-mGene
cg05403879	chr1	11132993	11132992	rs72870088:11136815:T:C	11076758	11076758	0	3.26558e-10	0.304184	0.0451605	185749	Distal mGene
cg25276694	chr1	11648893	11648892	rs12037955:11706791:T:C	11646734	11646734	0	7.01858e-08	-0.451259	0.0795471	-634072	Distal non-mGene
cg05796704	chr1	11654162	11654161	rs5772465:11714883:G:GGCGGGGC	11654826	11654826	0	2.27562e-07	0.19088	0.0351862	-607593	Distal non-mGene
cg21106899	chr1	11719747	11719746	rs12142522:11790584:T:A	11730527	11730527	0	1.8006e-10	0.180501	0.0263585	-718183	Distal non-mGene
cg09619883	chr1	11915426	11915425	rs2336371:11949816:G:T	11889759	11889759	0	3.39966e-13	-0.185815	0.0232702	-83663	Distal non-mGene
cg21104483	chr1	11908082	11908081	rs34536155:11967190:G:A	11907133	11907133	0	1.97761e-13	0.318517	0.0394197	-101037	Distal non-mGene
cg12808636	chr1	11927930	11927929	rs4846078:11967356:C:T	11907299	11907299	0	1.16538e-08	0.0928282	0.01537	-101203	Distal non-mGene
cg00648630	chr1	11909905	11909904	1:11968358:T:G	11908301	11908301	0	1.21185e-22	1.01263	0.0872026	-102205	Distal non-mGene
cg05802658	chr1	11908533	11908532	rs12403427:11968570:C:T	11908513	11908513	0	6.08746e-09	0.151731	0.0245953	-102417	Distal non-mGene
cg20978923	chr1	12124518	12124517	rs17422381	12124366	12124366	0	6.89618e-07	0.0896959	0.0173006	42577	Distal non-mGene
cg07499259	chr1	12128446	12128445	rs17456501:12188614:G:A	12128557	12128557	0	1.04031e-08	-0.469221	0.0773994	38386	Distal non-mGene
cg00463840	chr1	12128493	12128492	rs17456501:12188614:G:A	12128557	12128557	0	4.82532e-17	-1.06359	0.111981	38386	Distal non-mGene
cg18152455	chr1	12128581	12128580	rs17456501:12188614:G:A	12128557	12128557	0	1.0515e-11	-1.0089	0.13685	38386	Distal non-mGene
cg07925752	chr1	12128602	12128601	rs17456501:12188614:G:A	12128557	12128557	0	4.61792e-24	-1.37884	0.113555	38386	Distal non-mGene
cg09126203	chr1	12601444	12601443	rs12136952:12661421:G:C	12601409	12601409	0	3.23884e-10	0.144168	0.0213989	-371342	Distal non-mGene
cg20849121	chr1	12619946	12619945	rs4240903:12675699:G:A	12615695	12615695	0	7.48346e-07	0.139112	0.0269255	-385628	Distal non-mGene
cg26608693	chr1	13701087	13701086	rs139517091:14027737:TC:T	13701242	13701243	0	1.75469e-14	-0.351698	0.0413744	-1044	Promoter mGene
cg23238147	chr1	15112518	15112517	rs12046842:15439227:C:A	15112731	15112731	0	6.1508e-17	-0.144994	0.0153312	-1219939	Distal non-mGene
cg07180646	chr1	15155046	15155045	rs10737906:15469455:T:C	15142959	15142959	0	1.03824e-07	0.153124	0.0273873	104313	Distal non-mGene
cg21853568	chr1	16082408	16082407	rs4077113:16408820:G:C	16082325	16082325	0	2.38483e-07	-0.0890585	0.0164472	159073	Distal non-mGene
cg10312679	chr1	16115885	16115884	rs4661686:16410124:C:G	16083629	16083629	0	2.86468e-12	0.218659	0.0287449	157769	Distal non-mGene
cg23105827	chr1	16212625	16212624	rs61771381:16514898:C:T	16188403	16188403	0	2.59962e-10	0.146138	0.0215582	-114771	Distal non-mGene
cg17463745	chr1	16227908	16227907	rs11260710:16564863:A:G	16238368	16238368	0	1.95091e-07	-0.0950396	0.0174139	114207	Distal non-mGene
cg09004167	chr1	16727489	16727488	rs9663015:16950346:A:C	16623851	16623851	0	1.02134e-16	-0.918221	0.0979677	116422	Distal non-mGene
cg20065512	chr1	16927937	16927936	rs35331284:17246587:AT:A	16920092	16920093	0	6.27265e-10	0.980531	0.148309	-275409	Distal non-mGene
cg24306142	chr1	16905299	16905298	exm22429	16931345	16931345	1	7.49194e-08	-1.44444	0.255235	-313954	Distal non-mGene
cg01783960	chr1	16972046	16972045	rs116376266:17284247:A:T	16957752	16957752	0	3.68108e-22	0.77914	0.0681549	96418	Distal non-mGene
cg27529520	chr1	17112235	17112234	rs1022579:17439195:A:C	17112700	17112700	0	3.8167e-21	0.667469	0.0603963	6735	Distal mGene
cg16835277	chr1	17113791	17113790	rs1022579:17439195:A:C	17112700	17112700	0	5.10958e-14	0.330063	0.0396908	6735	Distal mGene
cg25960632	chr1	17119824	17119823	rs12130579:17443793:T:A	17117298	17117298	0	1.41837e-07	0.285968	0.0517558	87828	Distal non-mGene
cg15590113	chr1	17116486	17116485	rs35989645:17455376:AT:A	17128881	17128882	0	2.38275e-14	0.203501	0.0240895	76245	Distal non-mGene
cg06004306	chr1	17098666	17098665	rs910223	17133360	17133360	0	5.2245e-19	0.544392	0.053127	71766	Distal non-mGene
cg06900068	chr1	17099829	17099828	rs910223	17133360	17133360	0	1.84252e-07	0.195516	0.0357443	71766	Distal non-mGene
cg00597915	chr1	17115310	17115309	rs910223	17133360	17133360	0	4.78921e-14	0.476456	0.0572178	71766	Distal non-mGene
cg10233913	chr1	17119668	17119667	rs910223	17133360	17133360	0	1.09495e-07	0.269981	0.0483848	71766	Distal non-mGene
cg00569276	chr1	17120051	17120050	rs910223	17133360	17133360	0	3.00005e-11	0.394967	0.0550031	71766	Distal non-mGene
cg18879300	chr1	17120274	17120273	rs910223	17133360	17133360	0	2.66582e-09	0.203845	0.0321943	71766	Distal non-mGene
cg21838303	chr1	17237463	17237462	rs2977306:17563967:T:C	17237472	17237472	0	9.78241e-12	-0.228776	0.0309768	-118037	Distal non-mGene
cg09390181	chr1	18106699	18106698	rs78116078:18434125:C:G	18107631	18107631	0	2.50872e-09	0.187866	0.0296151	115	Promoter mGene
cg11232944	chr1	18107079	18107078	rs78116078:18434125:C:G	18107631	18107631	0	3.23547e-21	0.324668	0.0293065	115	Promoter mGene
cg08844966	chr1	18108751	18108750	rs78116078:18434125:C:G	18107631	18107631	0	3.05789e-09	-0.0825289	0.0130898	115	Promoter mGene
cg06163573	chr1	18175998	18175997	rs78116078:18434125:C:G	18107631	18107631	0	2.79612e-09	-0.154209	0.024391	115	Promoter mGene
cg05551713	chr1	18818284	18818283	rs7417542:19135214:G:A	18808720	18808720	0	6.43112e-14	0.186873	0.0225803	-213306	Distal non-mGene
cg12820366	chr1	18814910	18814909	rs7415682:19140598:T:C	18814104	18814104	0	8.49492e-16	0.205276	0.0227667	-218690	Distal non-mGene
cg15916653	chr1	18819289	18819288	rs112292906:19148774:C:G	18822280	18822280	0	3.9471e-08	0.224647	0.0387866	-226866	Distal non-mGene
cg03224850	chr1	18872662	18872661	rs11740:19199221:C:T	18872727	18872727	0	2.58008e-18	0.175648	0.0175932	-277313	Distal non-mGene
cg11406134	chr1	18876458	18876457	rs7550938:19202917:T:C	18876423	18876423	0	1.24096e-13	-0.669249	0.0819999	-281009	Distal non-mGene
cg16823064	chr1	18880066	18880065	rs71575901:19206517:C:CGCTGCTCTG	18880023	18880023	0	9.72328e-15	-0.320334	0.0372406	-284609	Distal non-mGene
cg18177731	chr1	18922883	18922882	rs61759277:19252031:G:A	18925537	18925537	0	1.81039e-07	-0.442574	0.0808561	149974	Distal non-mGene
cg13387374	chr1	19084613	19084612	rs66578410:19522463:TACACACAC:T	19195969	19195977	0	7.22399e-09	0.140878	0.0229626	14307	Distal mGene
cg15311933	chr1	19312404	19312403	rs2473808:19638883:T:C	19312389	19312389	0	3.84446e-07	0.0938113	0.0176601	284590	Distal non-mGene
cg25326069	chr1	19423350	19423349	rs12730973:19709918:A:G	19383424	19383424	0	1.83206e-12	0.188753	0.0245555	102115	Distal mGene
cg22512634	chr1	19463347	19463346	rs1875325:19781545:G:T	19455051	19455051	0	5.54368e-11	0.173882	0.0246027	141928	Distal non-mGene
cg01534871	chr1	19600357	19600356	rs4912130:19923313:T:A	19596819	19596819	0	9.22291e-12	-0.222746	0.0301167	-111280	Distal non-mGene
cg08822352	chr1	19659768	19659767	rs7364625:19986076:A:G	19659583	19659583	0	5.43602e-07	0.181833	0.0347229	-174044	Distal non-mGene
cg05364829	chr1	21345418	21345417	rs2072654:21671943:T:G	21345450	21345450	0	5.39857e-09	0.125071	0.0201958	54	Promoter mGene
cg02582404	chr1	21346355	21346354	rs2072654:21671943:T:G	21345450	21345450	0	1.20627e-09	-0.212748	0.0328022	54	Promoter mGene
cg24722348	chr1	21574495	21574494	rs4654969:21897893:C:T	21571400	21571400	0	1.99513e-13	-0.365649	0.0452613	-62028	Distal mGene
cg11896266	chr1	21574232	21574231	rs10917020:21899173:C:T	21572680	21572680	0	2.08799e-13	-0.312506	0.0387212	-63308	Distal mGene
cg14195027	chr1	21575193	21575192	rs2275368:21900583:A:G	21574090	21574090	0	7.52141e-08	-0.223686	0.0395314	-64718	Distal mGene
cg24307341	chr1	21577992	21577991	rs36053309:21905604:C:T	21579111	21579111	0	1.14461e-07	0.103366	0.0185559	-69739	Distal mGene
cg07180649	chr1	22143798	22143797	rs12404660:22458794:A:G	22132301	22132301	0	5.7814e-09	0.144577	0.0233969	511329	Distal non-mGene
cg26928911	chr1	22642500	22642499	rs682658:22968815:G:T	22642322	22642322	0	2.3935e-07	-0.096308	0.0177885	-190471	Distal non-mGene
cg01740960	chr1	22642517	22642516	rs623607:22986716:T:A	22660223	22660223	0	3.64424e-08	-0.11171	0.0192329	50616	Distal non-mGene
cg11610429	chr1	22704828	22704827	rs6687402:23031406:G:A	22704913	22704913	0	2.04641e-15	0.326384	0.0368065	5926	Distal non-mGene
cg16262774	chr1	22888618	22888617	rs12046210:23211843:G:A	22885350	22885350	0	1.1773e-06	-0.118461	0.0233831	-174511	Distal mGene
cg00023024	chr1	23194780	23194779	rs667329:23515256:C:T	23188763	23188763	0	2.73933e-29	-1.02387	0.0725992	-10955	Distal non-mGene
cg21947136	chr1	23194817	23194816	rs667329:23515256:C:T	23188763	23188763	0	4.89432e-26	-0.933926	0.0725056	-10955	Distal non-mGene
cg20678835	chr1	23194840	23194839	rs667329:23515256:C:T	23188763	23188763	0	3.24514e-33	-1.29854	0.0832357	-10955	Distal non-mGene
cg22040403	chr1	23531525	23531524	rs2742976:23858002:T:G	23531510	23531510	0	2.24736e-14	0.277114	0.0327644	49985	Distal non-mGene
cg17246694	chr1	24154358	24154357	rs7532647:24481351:T:C	24154861	24154861	0	1.82005e-10	-0.266284	0.0388968	262073	Distal non-mGene
cg26835312	chr1	24186984	24186983	rs12094257:24513608:C:T	24187118	24187118	0	7.08945e-07	0.166179	0.0320904	229816	Distal non-mGene
cg08700651	chr1	24186993	24186992	rs12094257:24513608:C:T	24187118	24187118	0	9.00204e-08	0.148879	0.0264866	229816	Distal non-mGene
cg07645741	chr1	23273541	23273540	rs148433388:24538874:T:C	24212384	24212384	0	1.1024e-06	0.175892	0.0346193	204550	Distal non-mGene
cg21686600	chr1	24393220	24393219	exm32381	24391589	24391589	0	2.12079e-16	-0.287317	0.0310605	-203630	Distal non-mGene
cg10150518	chr1	24415188	24415187	rs144796893:24728916:ATCT:A	24402426	24402429	0	5.47594e-10	0.198064	0.0298408	-202186	Distal non-mGene
cg21298759	chr1	24415234	24415233	rs144796893:24728916:ATCT:A	24402426	24402429	0	5.04432e-11	0.215395	0.0304014	-202186	Distal non-mGene
cg09874213	chr1	24641862	24641861	rs4649004:24946754:T:C	24620263	24620263	0	2.35548e-11	-0.145427	0.0201278	-420023	Distal non-mGene
cg04907595	chr1	24931774	24931773	rs1005733:25261960:T:A	24935469	24935469	0	1.07058e-07	0.154556	0.0276754	177651	Distal non-mGene
cg03257180	chr1	25700255	25700254	rs184471698:26026746:G:A	25700255	25700255	0	7.03552e-21	-1.20723	0.110231	-82787	Distal mGene
cg07424646	chr1	25704511	25704510	rs2744784:26030613:G:A	25704122	25704122	0	7.24848e-31	-0.811249	0.0551824	-86654	Distal mGene
cg05887270	chr1	25803137	25803136	rs71577800:26123587:A:ATGTG	25797096	25797096	0	3.71874e-11	0.188318	0.0263703	-366238	Distal non-mGene
cg09149784	chr1	25797368	25797367	rs7524771:26126375:A:G	25799884	25799884	0	7.23999e-13	-0.22634	0.0288266	-369026	Distal non-mGene
cg24596570	chr1	25819973	25819972	rs2280997:26135741:C:G	25809250	25809250	0	1.17682e-16	0.338882	0.036248	-378392	Distal non-mGene
cg20826610	chr1	25909378	25909377	rs34481251:26217822:TAA:T	25891331	25891333	0	3.81029e-07	0.100628	0.0189365	106826	Distal non-mGene
cg22943243	chr1	25905821	25905820	rs213641:26232356:C:A	25905865	25905865	0	1.1583e-08	0.15057	0.0249255	92292	Distal non-mGene
cg02803556	chr1	25934303	25934302	rs6698927:26260728:G:A	25934237	25934237	0	2.51646e-07	0.137466	0.0254409	63920	Distal non-mGene
cg13783323	chr1	26020602	26020601	rs6598939:26346284:T:C	26019793	26019793	0	1.90094e-09	-0.0988707	0.0154542	-112802	Distal non-mGene
cg24519413	chr1	26164050	26164049	rs9783055:26491492:C:T	26165001	26165001	0	9.22813e-13	0.219692	0.0281339	69152	Distal non-mGene
cg11887554	chr1	26170821	26170820	rs8768:26497340:A:C	26170849	26170849	0	4.27779e-08	-0.105554	0.0182767	38892	Distal non-mGene
cg03340041	chr1	26170901	26170900	rs8768:26497340:A:C	26170849	26170849	0	5.33507e-08	-0.0969003	0.0169118	38892	Distal non-mGene
cg07084796	chr1	26172072	26172071	rs2783626:26501044:A:G	26174553	26174553	0	1.67087e-07	-0.157989	0.0287742	35188	Distal non-mGene
cg03844060	chr1	26164138	26164137	rs35441236:26501063:A:AT	26174572	26174572	0	1.32914e-10	0.232267	0.0336383	35169	Distal non-mGene
cg00813993	chr1	26318003	26318002	rs11577318:26601570:A:G	26275079	26275079	0	2.23582e-26	0.311605	0.0239547	-163914	Distal non-mGene
cg24410607	chr1	26436325	26436324	rs71680492:26757610:CTAAA:C	26431119	26431123	0	8.51146e-08	0.186047	0.0330301	1163	Promoter mGene
cg19008222	chr1	26621341	26621340	rs182426035:26923124:A:G	26596633	26596633	0	3.01868e-10	0.240277	0.0355939	96603	Distal non-mGene
cg03375056	chr1	28735920	28735919	rs79754757:28400798:T:C	28074287	28074287	0	1.26097e-07	-0.415848	0.0749254	158738	Distal non-mGene
cg14378564	chr1	28091240	28091239	rs112902604:28417045:C:A	28090534	28090534	0	7.80276e-16	0.941498	0.104253	142491	Distal non-mGene
cg15161854	chr1	28509628	28509627	rs41284311:28530167:C:T	28203656	28203656	0	3.58965e-08	-0.59115	0.101723	-114960	Distal non-mGene
cg11975685	chr1	28246902	28246901	rs5773213:28533579:GA:G	28207068	28207069	0	9.30197e-23	0.463205	0.039742	-118372	Distal non-mGene
cg07148744	chr1	28247367	28247366	rs505966:28553377:A:G	28226866	28226866	0	1.08177e-13	0.201257	0.024587	-312120	Distal non-mGene
cg02330710	chr1	28746207	28746206	rs3738067:29063236:G:A	28736724	28736724	0	1.47632e-11	0.179759	0.0245889	-93639	Distal non-mGene
cg11226328	chr1	28886856	28886855	1:29207127:C:CA	28880615	28880615	0	5.28662e-08	0.202639	0.0353546	6476	Distal mGene
cg25287272	chr1	28886722	28886721	rs457618:29213316:A:C	28886804	28886804	0	6.10193e-11	0.202388	0.0287082	287	Promoter mGene
cg03131236	chr1	29217701	29217700	rs139233377:29535724:ACTTACC:A	29209212	29209218	0	8.05644e-07	-0.262421	0.0509527	-322121	Distal non-mGene
cg24013909	chr1	29249194	29249193	rs139121461:29575675:C:CACAT	29249163	29249163	0	8.51617e-18	0.36528	0.0373254	1474424	Distal non-mGene
cg12700145	chr1	30685354	30685353	rs1211456:31160359:T:C	30687512	30687512	0	5.73591e-17	-0.243194	0.0256829	-1456570	Distal non-mGene
cg01809819	chr1	30719319	30719318	rs12757994:31183435:G:T	30710588	30710588	0	6.37958e-09	0.213961	0.0347349	-1479646	Distal non-mGene
cg16925659	chr1	30719305	30719304	rs4949290:31203860:G:A	30731013	30731013	0	6.13998e-18	0.302801	0.0307707	-1494497	Distal non-mGene
cg06825886	chr1	30775698	30775697	rs4147103:31255905:T:C	30783058	30783058	0	4.50067e-07	0.125195	0.0237208	125703	Distal non-mGene
cg08372168	chr1	30824233	30824232	rs3862889:31291348:A:G	30818501	30818501	0	2.49536e-21	0.276979	0.0249066	90260	Distal non-mGene
cg13854500	chr1	30824459	30824458	rs3862889:31291348:A:G	30818501	30818501	0	1.42266e-29	0.788173	0.0554635	90260	Distal non-mGene
cg24996263	chr1	30824598	30824597	rs3862889:31291348:A:G	30818501	30818501	0	4.61161e-28	0.632956	0.0464018	90260	Distal non-mGene
cg24947847	chr1	31413643	31413642	rs111456525:31893379:G:GTTGT	31420532	31420532	0	4.40863e-11	0.395856	0.0556766	-180978	Distal non-mGene
cg24123738	chr1	31413646	31413645	rs11589125:31894396:C:T	31421549	31421549	0	1.55995e-11	0.95314	0.130558	-181995	Distal non-mGene
cg15518761	chr1	31580146	31580145	rs12744206:31894974:C:T	31422127	31422127	0	9.84668e-07	0.539205	0.105605	-182573	Distal non-mGene
cg19156395	chr1	31645272	31645271	rs75145224:32128140:T:C	31662539	31662539	0	1.08204e-07	0.302098	0.0541165	126591	Distal non-mGene
cg26787521	chr1	32798901	32798900	rs6702519:33231403:G:T	32765802	32765802	0	4.72761e-10	-0.166752	0.0250176	-362687	Distal non-mGene
cg05660436	chr1	32893357	32893356	rs77242526:33344356:AG:A	32878755	32878756	0	7.68581e-07	-0.488684	0.0946938	202241	Distal non-mGene
cg16007395	chr1	32765470	32765469	rs35154516:33396689:C:CA	32931088	32931088	0	3.2666e-07	-0.135782	0.025393	55987	Distal non-mGene
cg26406441	chr1	32961541	32961540	rs200136829:33401363:C:CT	32935762	32935762	0	2.12773e-07	-0.303231	0.0557491	28923	Distal mGene
cg14806693	chr1	32940242	32940241	rs171837:33404367:C:T	32938766	32938766	0	1.51167e-20	0.486279	0.0449132	25919	Distal mGene
cg04906435	chr1	32961207	32961206	rs171837:33404367:C:T	32938766	32938766	0	1.66193e-08	0.21086	0.0353312	25919	Distal mGene
cg10120255	chr1	32961140	32961139	rs35049190:33420339:C:CA	32954738	32954738	0	7.04624e-13	0.233106	0.0296702	9947	Distal mGene
cg17329292	chr1	33430290	33430289	rs79505176:33626833:G:A	33161232	33161232	0	1.03443e-09	-0.312294	0.0479315	311413	Distal non-mGene
cg03331207	chr1	33318137	33318136	exm2251422	33330480	33330480	0	1.14372e-10	0.139311	0.0200941	100572	Distal non-mGene
cg11401957	chr1	33709570	33709569	rs6668431:33796879:G:A	33331278	33331278	0	4.52526e-07	-0.355156	0.0673068	99774	Distal non-mGene
cg21578869	chr1	33376331	33376330	rs4233199	33353961	33353961	0	6.64905e-16	-0.166334	0.0183635	77091	Distal mGene
cg15586632	chr1	33376322	33376321	rs11422037:33838721:C:CT	33373120	33373120	0	1.37656e-17	-0.276522	0.0284878	-116575	Distal non-mGene
cg07461987	chr1	33355750	33355749	rs10157574:33871072:G:A	33405471	33405471	1	1.08491e-06	-1.0654	0.209547	25581	Distal mGene
cg07461987	chr1	33355750	33355749	rs1123295:33910453:A:G	33444852	33444852	0	1.92855e-09	0.624098	0.0975939	-13800	Distal mGene
cg26227027	chr1	33379286	33379285	rs12025675:33912754:G:A	33447153	33447153	0	2.59758e-07	-0.0843178	0.0156245	-190608	Distal non-mGene
cg18238718	chr1	33276769	33276768	rs1570685:33913346:G:A	33447745	33447745	0	1.78391e-07	0.0712979	0.0130183	-191200	Distal mGene
cg16987567	chr1	33324774	33324773	rs114013172:33916233:A:G	33450632	33450632	0	6.95364e-07	-0.0711985	0.0137377	-194087	Distal non-mGene
cg27180860	chr1	35717555	35717554	rs11264194:36195372:C:T	35729771	35729771	0	1.61592e-07	0.285886	0.0520007	-172298	Distal non-mGene
cg02703525	chr1	35717685	35717684	rs11264194:36195372:C:T	35729771	35729771	0	3.47219e-08	0.389373	0.0669234	-172298	Distal non-mGene
cg02927292	chr1	36036217	36036216	rs272821:36678116:C:A	36212515	36212515	0	6.01219e-09	1.03463	0.167644	11901	Distal non-mGene
cg19708900	chr1	37727055	37727054	rs112367522:38152992:C:T	37687320	37687320	0	7.1969e-43	1.10794	0.0569413	-212909	Distal non-mGene
cg22449745	chr1	37691268	37691267	rs368592155:38153133:T:TAA	37687461	37687461	0	1.67862e-17	-0.265049	0.0273988	-213050	Distal non-mGene
cg02680427	chr1	38783591	38783590	rs12729493	38781817	38781817	0	2.06338e-07	0.174586	0.0320591	-734503	Distal non-mGene
cg09071280	chr1	39076281	39076280	rs146110275:39288781:G:GGA	38823109	38823109	0	5.96209e-07	0.138647	0.0265786	-776315	Distal non-mGene
cg23623880	chr1	39105328	39105327	rs2282232	39103093	39103093	0	4.99727e-31	0.693908	0.0470041	-21777	Distal mGene
cg05374241	chr1	39332429	39332428	rs5773652:39681115:G:GT	39215443	39215443	0	2.31038e-09	0.171569	0.0269777	-134127	Distal mGene
cg06209491	chr1	39672731	39672730	rs34131880:40121746:AG:A	39656074	39656075	0	3.08756e-13	-0.152235	0.0190245	-574758	Distal non-mGene
cg16555417	chr1	40133101	40133100	rs4492609	40133103	40133103	0	5.23728e-14	0.369157	0.0444148	200454	Distal non-mGene
cg08166631	chr1	40133340	40133339	rs112323754:40626344:CAGG:C	40160672	40160675	0	1.5954e-15	0.282969	0.0317592	97295	Distal non-mGene
cg15876071	chr1	40344167	40344166	rs442418:40807033:T:C	40341361	40341361	0	3.82313e-10	0.247987	0.0369813	-243658	Distal non-mGene
cg17016894	chr1	41423795	41423794	rs12133441	41423841	41423841	0	4.65899e-08	0.128554	0.0223271	-181468	Distal non-mGene
cg12437479	chr1	41432899	41432898	rs4451540:41905272:C:T	41439601	41439601	0	7.71558e-22	0.328412	0.0290332	-197228	Distal non-mGene
cg25193276	chr1	41435976	41435975	rs4451540:41905272:C:T	41439601	41439601	0	5.81707e-14	-0.236097	0.0284681	-197228	Distal non-mGene
cg24998527	chr1	42145937	42145936	rs1572041:42611553:G:A	42145882	42145882	0	2.23201e-17	-0.138981	0.0144375	621202	Distal non-mGene
cg22816091	chr1	42146000	42145999	rs1572041:42611553:G:A	42145882	42145882	0	9.58399e-12	-0.115438	0.0156227	621202	Distal non-mGene
cg10197057	chr1	42146848	42146847	rs1572041:42611553:G:A	42145882	42145882	0	1.65753e-07	-0.130069	0.0236818	621202	Distal non-mGene
cg09212118	chr1	42164856	42164855	rs12727077:42630724:G:A	42165053	42165053	0	4.63947e-09	-0.143934	0.0231298	-129128	Distal non-mGene
cg06092502	chr1	42146017	42146016	1:42632881:A:G	42167210	42167210	0	3.22313e-11	0.221394	0.030888	-131285	Distal non-mGene
cg04775750	chr1	42229081	42229080	rs12759864:42633264:A:C	42167593	42167593	0	1.8021e-07	0.127092	0.0232149	-131668	Distal non-mGene
cg12619880	chr1	43707128	43707127	rs77398040:43861086:T:G	43395415	43395415	0	6.84956e-26	1.91583	0.149369	-124479	Distal non-mGene
cg23930257	chr1	43735521	43735520	rs77398040:43861086:T:G	43395415	43395415	0	3.83966e-11	-0.812713	0.113899	-124479	Distal non-mGene
cg25041176	chr1	43735546	43735545	rs77398040:43861086:T:G	43395415	43395415	0	3.33923e-11	-1.18899	0.166035	-124479	Distal non-mGene
cg18880737	chr1	43753438	43753437	rs77398040:43861086:T:G	43395415	43395415	0	7.3723e-10	-0.891547	0.135483	-124479	Distal non-mGene
cg05180596	chr1	43760873	43760872	rs77398040:43861086:T:G	43395415	43395415	0	1.4258e-10	-1.04435	0.151537	-124479	Distal non-mGene
cg08959526	chr1	43770324	43770323	rs77398040:43861086:T:G	43395415	43395415	0	5.10672e-19	-1.57756	0.153897	-124479	Distal non-mGene
cg23848055	chr1	43774951	43774950	rs77398040:43861086:T:G	43395415	43395415	0	3.28561e-16	-1.73525	0.189094	-124479	Distal non-mGene
cg11958827	chr1	43786456	43786455	rs114361356:44161275:G:A	43695604	43695604	0	4.02578e-13	-0.782528	0.0983647	278883	Distal non-mGene
cg16047291	chr1	43786913	43786912	rs114361356:44161275:G:A	43695604	43695604	0	3.95993e-10	-0.897852	0.134027	278883	Distal non-mGene
cg13666471	chr1	43783816	43783815	rs917294:44249485:A:G	43783814	43783814	0	1.53366e-19	0.535628	0.0512651	-77990	Distal mGene
cg13964099	chr1	43924705	43924704	rs4660262:44382524:G:A	43916852	43916852	0	3.06479e-23	0.348518	0.0294469	-211028	Distal mGene
cg23954153	chr1	43936682	43936681	rs12127737:44402565:G:A	43936893	43936893	0	1.3937e-08	-0.185461	0.0308916	-411706	Distal non-mGene
cg12908607	chr1	43936851	43936850	rs12127737:44402565:G:A	43936893	43936893	0	3.73745e-16	-0.570563	0.0623227	-411706	Distal non-mGene
cg05053708	chr1	44603824	44603823	rs6704426	44601763	44601763	0	9.03355e-07	0.125943	0.0245744	-388308	Distal non-mGene
cg00940659	chr1	45007027	45007026	rs998418:45486272:T:C	45020600	45020600	0	4.39203e-12	-0.179274	0.0238075	285609	Distal non-mGene
cg15801815	chr1	45010785	45010784	rs34579942:45492683:C:CA	45027011	45027011	0	3.68756e-22	0.195109	0.0170675	279198	Distal non-mGene
cg18845703	chr1	45012026	45012025	rs10465876:45494750:T:C	45029078	45029078	0	5.17706e-25	0.270706	0.0216606	277131	Distal non-mGene
cg05978555	chr1	46175081	46175080	rs35018988:46640602:C:CA	46174930	46174930	0	1.57606e-06	0.0752932	0.0150564	-387943	Distal non-mGene
cg06212760	chr1	46199266	46199265	rs7521617:46664754:C:T	46199082	46199082	0	2.37792e-13	0.210586	0.0261667	-412095	Distal non-mGene
cg16387850	chr1	46517218	46517217	rs12138736:46999758:T:C	46534086	46534086	0	1.45278e-16	-0.323943	0.0347814	-101957	Distal non-mGene
cg06995548	chr1	46543856	46543855	rs1317949:47005429:C:T	46539757	46539757	0	7.88381e-07	0.0916553	0.0177796	-107628	Distal non-mGene
cg08643108	chr1	46543775	46543774	rs35998093:47007262:CT:C	46541590	46541591	0	1.89898e-13	0.151858	0.0187774	-109461	Distal non-mGene
cg06660332	chr1	46544036	46544035	rs4442318:47012448:T:C	46546776	46546776	0	3.2095e-08	-0.255931	0.0438665	-114647	Distal non-mGene
cg13353942	chr1	46544552	46544551	rs4442318:47012448:T:C	46546776	46546776	0	3.6805e-09	-0.153148	0.0244315	-114647	Distal non-mGene
cg15501359	chr1	46719380	46719379	rs4097354:47187073:T:G	46721401	46721401	0	2.56784e-12	0.263671	0.0345732	-289272	Distal non-mGene
cg05514783	chr1	47725765	47725764	rs4926601	47727533	47727533	0	3.04623e-22	0.333902	0.0291295	-319056	Distal non-mGene
cg22345063	chr1	47726031	47726030	rs4926601	47727533	47727533	0	5.23594e-28	0.298571	0.0219215	-319056	Distal non-mGene
cg03438665	chr1	48205880	48205879	rs11205453:48671518:G:C	48205846	48205846	0	3.251e-08	-0.119364	0.0204682	-23418	Distal non-mGene
cg00866264	chr1	48221212	48221211	rs17299309:48672919:C:G	48207247	48207247	0	5.64508e-07	-0.150858	0.0288533	-24819	Distal non-mGene
cg04527603	chr1	52726417	52726416	rs76280926:53192082:T:G	52726410	52726410	0	1.6749e-19	0.229889	0.0220332	454511	Distal non-mGene
cg24675658	chr1	52726425	52726424	rs76280926:53192082:T:G	52726410	52726410	0	2.13316e-19	0.217302	0.0209063	454511	Distal non-mGene
cg27535305	chr1	52926979	52926978	rs1242331:53392908:A:G	52927236	52927236	0	6.77001e-30	-0.575548	0.0401561	215396	Distal non-mGene
cg08859206	chr1	52927103	52927102	rs1242331:53392908:A:G	52927236	52927236	0	7.56753e-22	-0.654277	0.057825	215396	Distal non-mGene
cg25767906	chr1	52927110	52927109	rs1242331:53392908:A:G	52927236	52927236	0	3.29064e-27	-0.677413	0.0508564	215396	Distal non-mGene
cg20055417	chr1	52927173	52927172	rs1242331:53392908:A:G	52927236	52927236	0	4.53817e-29	-0.980277	0.0699186	215396	Distal non-mGene
cg03609269	chr1	52927352	52927351	rs1242331:53392908:A:G	52927236	52927236	0	2.30881e-26	-0.619781	0.0476647	215396	Distal non-mGene
cg04310824	chr1	52927626	52927625	rs1242331:53392908:A:G	52927236	52927236	0	1.86125e-11	-0.225744	0.0310588	215396	Distal non-mGene
cg03579872	chr1	52927802	52927801	rs1242331:53392908:A:G	52927236	52927236	0	4.10193e-24	-0.426677	0.0350835	215396	Distal non-mGene
cg01802117	chr1	52927889	52927888	rs1242331:53392908:A:G	52927236	52927236	0	5.61153e-28	-1.20508	0.0885522	215396	Distal non-mGene
cg02813845	chr1	52928081	52928080	rs1242331:53392908:A:G	52927236	52927236	0	2.85066e-28	-0.839526	0.0611927	215396	Distal non-mGene
cg27428660	chr1	54053502	54053501	rs201851293:53601810:ACT:A	53136138	53136140	0	3.03806e-07	-0.195165	0.036392	6494	Distal non-mGene
cg14898108	chr1	53143018	53143017	rs2404211:53607666:T:C	53141994	53141994	0	1.58479e-15	0.188818	0.0211895	638	Promoter mGene
cg20780708	chr1	53197143	53197142	rs72673121:53662823:C:A	53197151	53197151	0	2.75043e-13	0.179833	0.0224165	-269939	Distal non-mGene
cg03341469	chr1	53890234	53890233	rs10888814:54355041:A:G	53889368	53889368	0	1.97487e-18	0.379685	0.0378624	56561	Distal non-mGene
cg05461140	chr1	54298961	54298960	rs2183162:54762721:T:G	54297048	54297048	0	6.26043e-11	-0.363349	0.0515751	-243461	Distal non-mGene
cg08106066	chr1	54475498	54475497	rs79711866:54941934:T:C	54476261	54476261	0	7.04338e-07	-0.122463	0.0236419	-62782	Distal non-mGene
cg20008667	chr1	54806009	54806008	rs2307949:55262958:CAT:C	54797285	54797287	0	3.99583e-10	-0.143803	0.0214717	-743698	Distal non-mGene
cg22409500	chr1	54806012	54806011	rs2307949:55262958:CAT:C	54797285	54797287	0	1.21406e-11	-0.275284	0.0374731	-743698	Distal non-mGene
cg17779831	chr1	54806021	54806020	rs2307949:55262958:CAT:C	54797285	54797287	0	2.01783e-09	-0.139265	0.0218077	-743698	Distal non-mGene
cg06221218	chr1	54764953	54764952	rs7519299:55417370:T:C	54951697	54951697	0	4.95992e-08	0.123286	0.0214604	47236	Distal non-mGene
cg05306153	chr1	54950742	54950741	rs7519299:55417370:T:C	54951697	54951697	0	3.72279e-10	0.265449	0.0395556	47236	Distal non-mGene
cg14267555	chr1	56580074	56580073	rs78661681:57045755:AACC:A	56580082	56580085	0	1.10421e-18	-0.327394	0.0323389	-1364969	Distal non-mGene
cg16786284	chr1	58460660	58460659	rs12726229:58950901:A:T	58485229	58485229	0	1.27338e-24	-0.378187	0.0306186	811409	Distal non-mGene
cg21177673	chr1	58250551	58250550	rs141377546:58983944:G:A	58518272	58518272	0	1.01235e-16	-0.207427	0.0221275	181820	Distal non-mGene
cg11256607	chr1	58250635	58250634	rs141377546:58983944:G:A	58518272	58518272	0	4.72015e-14	-0.252855	0.0303563	181820	Distal non-mGene
cg06710648	chr1	58250706	58250705	rs141377546:58983944:G:A	58518272	58518272	0	1.10851e-21	-0.312298	0.0277532	181820	Distal non-mGene
cg10087412	chr1	58250861	58250860	rs141377546:58983944:G:A	58518272	58518272	0	1.41998e-17	-0.277236	0.0285765	181820	Distal non-mGene
cg08249075	chr1	58358638	58358637	rs141377546:58983944:G:A	58518272	58518272	0	3.36194e-21	-0.407607	0.0368137	181820	Distal non-mGene
cg16661813	chr1	58546721	58546720	rs11207251:59009482:G:A	58543810	58543810	0	2.36826e-14	0.141146	0.0167062	156282	Distal non-mGene
cg02533419	chr1	58783653	58783652	rs1980700	58779120	58779120	0	1.32518e-12	0.240435	0.0310459	517518	Distal non-mGene
cg00575674	chr1	60848626	60848625	rs34657549:61314371:CA:C	60848699	60848700	0	7.89412e-08	-0.139525	0.0247019	16560	Distal non-mGene
cg24337878	chr1	62391570	62391569	rs12073544:62858634:C:T	62392963	62392963	0	1.99539e-11	0.12856	0.0177188	-650486	Distal non-mGene
cg07661407	chr1	63593268	63593267	rs3838451:63909553:TGGG:T	63443882	63443885	0	3.22147e-11	0.461395	0.0643713	-659747	Distal non-mGene
cg26449961	chr1	63593184	63593183	rs71701980:64065169:TAA:T	63599498	63599500	0	1.85986e-08	0.22014	0.0370272	604129	Distal non-mGene
cg03373115	chr1	63593213	63593212	rs855315:64069612:A:G	63603941	63603941	0	3.20554e-12	0.580333	0.0764934	599686	Distal non-mGene
cg05762488	chr1	63674662	63674661	rs705510:64127936:G:C	63662265	63662265	0	2.78573e-09	0.12836	0.0203001	111757	Distal non-mGene
cg21119717	chr1	65264418	65264417	rs11208616	65258168	65258168	0	1.62359e-09	-0.156305	0.0243153	-9949	Distal mGene
cg27037565	chr1	65264611	65264610	rs34750466:65741582:C:CT	65275899	65275899	0	6.0643e-08	-0.163556	0.0286778	-27680	Distal mGene
cg05531421	chr1	65306656	65306655	rs10789179:65772315:G:A	65306632	65306632	0	1.91971e-18	0.374295	0.0373075	-58413	Distal mGene
cg26299980	chr1	65419766	65419765	rs3838397:65877409:TG:T	65411726	65411727	0	1.35722e-08	-0.111232	0.018511	-163507	Distal non-mGene
cg14976592	chr1	65420478	65420477	rs12145690	65421330	65421330	0	2.21253e-31	0.333867	0.0224108	-173111	Distal non-mGene
cg16413020	chr1	65420734	65420733	rs12145690	65421330	65421330	0	1.01886e-17	0.189964	0.0194702	-173111	Distal non-mGene
cg09621235	chr1	65687955	65687954	rs78052673:66148652:T:C	65682969	65682969	0	1.04422e-13	0.209444	0.0255679	-535420	Distal non-mGene
cg04111102	chr1	65688112	65688111	rs79653480:66148954:T:A	65683271	65683271	0	2.9222e-13	0.185125	0.0231068	-535722	Distal non-mGene
cg23534774	chr1	65570612	65570611	rs76303603:66165578:T:C	65699895	65699895	0	5.6359e-08	1.27525	0.223008	-552346	Distal non-mGene
cg04700907	chr1	66248850	66248849	exm2268897	66248901	66248901	0	2.51221e-13	0.227844	0.0283451	-456387	Distal mGene
cg10495572	chr1	66445511	66445510	rs783435	66449442	66449442	0	1.29574e-07	-0.0986889	0.0177997	-656928	Distal non-mGene
cg13052034	chr1	66533556	66533555	1:66999215:G:GATAAT	66533532	66533532	0	2.04052e-28	0.778323	0.0565064	-149	Promoter mGene
cg09112723	chr1	66676726	66676725	rs78137332:67152483:C:G	66686800	66686800	0	3.30947e-07	0.481784	0.0901469	-153417	Distal mGene
cg16996144	chr1	66752268	66752267	rs376427492:67152981:C:CA	66687298	66687298	0	1.77021e-09	0.154651	0.0241209	-153915	Distal non-mGene
cg11580118	chr1	66758232	66758231	rs12059355:67223764:G:C	66758081	66758081	0	4.18257e-17	0.19035	0.0199909	473772	Distal non-mGene
cg00044354	chr1	66924202	66924201	rs112558617:67457477:C:CT	66991794	66991794	0	4.72079e-11	-0.414138	0.0583516	240059	Distal non-mGene
cg17833169	chr1	67134865	67134864	rs12044149:67600686:G:T	67135003	67135003	0	2.35978e-16	0.745994	0.0808026	-382544	Distal non-mGene
cg22654157	chr1	67135016	67135015	rs12044149:67600686:G:T	67135003	67135003	0	1.28462e-28	0.41757	0.0301499	-382544	Distal non-mGene
cg12940439	chr1	67135025	67135024	rs12044149:67600686:G:T	67135003	67135003	0	6.14894e-25	0.353508	0.0283494	-382544	Distal non-mGene
cg09433222	chr1	67135140	67135139	rs12044149:67600686:G:T	67135003	67135003	0	5.18068e-27	0.502154	0.0379094	-382544	Distal non-mGene
cg21684588	chr1	67134583	67134582	exm-rs11209003	67135449	67135449	0	2.57581e-20	0.298659	0.0278079	-382990	Distal non-mGene
cg03340356	chr1	67135153	67135152	exm-rs11209003	67135449	67135449	0	2.12936e-20	0.43622	0.0404988	-382990	Distal non-mGene
cg08029281	chr1	67134746	67134745	rs12060309:67604219:T:C	67138536	67138536	0	1.0957e-11	0.596923	0.0810505	-386077	Distal non-mGene
cg02132783	chr1	67135281	67135280	rs12060309:67604219:T:C	67138536	67138536	0	3.18245e-17	0.291698	0.030489	-386077	Distal non-mGene
cg17031739	chr1	67134490	67134489	rs10789224	67139451	67139451	0	3.71794e-18	0.3412	0.0343829	-386992	Distal non-mGene
cg02565946	chr1	67539598	67539597	rs6702973:68001418:A:G	67535735	67535735	0	2.50625e-29	-0.511557	0.0362352	297732	Distal non-mGene
cg09094121	chr1	68231874	68231873	rs2566774:68694877:T:C	68229194	68229194	0	8.4509e-27	0.326253	0.0247791	-396891	Distal non-mGene
cg00242147	chr1	68231134	68231133	rs72670465:68695462:C:A	68229779	68229779	0	2.01909e-08	0.268918	0.0453586	-397476	Distal non-mGene
cg02925615	chr1	70504547	70504546	rs622854:70977879:A:G	70512196	70512196	0	2.7574e-09	-0.197949	0.0312957	-943798	Distal non-mGene
cg06937997	chr1	71046418	71046417	rs9970739:71539253:T:A	71073570	71073570	0	7.59342e-08	-0.263631	0.046607	-867888	Distal non-mGene
cg03837750	chr1	74198477	74198476	rs71798754:74681010:C:CT	74215326	74215326	0	7.35873e-11	0.119743	0.0170694	-3134002	Distal non-mGene
cg12303627	chr1	75083573	75083572	rs184677113:75677577:T:C	75211892	75211892	0	4.51811e-14	-0.702311	0.0842387	-478740	Distal non-mGene
cg17199271	chr1	75615355	75615354	rs6670607:76088640:C:G	75622955	75622955	0	1.71305e-06	-0.0950666	0.0190822	-11839	Distal non-mGene
cg14618562	chr1	76154493	76154492	rs61771337:76610280:G:A	76144595	76144595	0	1.25523e-09	-0.208447	0.0321773	722846	Distal non-mGene
cg24580071	chr1	76154587	76154586	rs12122853:76620253:G:A	76154568	76154568	0	2.57308e-10	-0.330507	0.0487424	1064862	Distal non-mGene
cg04073724	chr1	76154650	76154649	rs12122853:76620253:G:A	76154568	76154568	0	5.97749e-08	-0.260834	0.0457107	1064862	Distal non-mGene
cg05002748	chr1	78685686	78685685	rs58830966:79122899:A:G	78657214	78657214	0	1.22209e-11	-0.209381	0.0285068	-677672	Distal non-mGene
cg26347197	chr1	83860987	83860986	rs116385455:84407253:G:T	83941570	83941570	0	1.29546e-09	1.73403	0.267929	136492	Distal non-mGene
cg02483449	chr1	83861174	83861173	rs116385455:84407253:G:T	83941570	83941570	1	1.09912e-08	1.64405	0.271684	136492	Distal non-mGene
cg04407776	chr1	83999327	83999326	rs657134:84471653:A:G	84005970	84005970	0	2.91426e-24	0.256215	0.0209717	72092	Distal non-mGene
cg24334243	chr1	84620769	84620768	rs2994434:85086434:G:T	84620751	84620751	0	1.98932e-09	0.0931916	0.0145867	-621601	Distal non-mGene
cg15533467	chr1	84691817	84691816	rs2911562	84660460	84660460	0	5.21167e-10	-0.181429	0.0272957	-661310	Distal non-mGene
cg10574897	chr1	84691501	84691500	rs11164046:85172633:G:T	84706950	84706950	0	9.24924e-09	0.191793	0.0315145	-707800	Distal non-mGene
cg20267580	chr1	84754448	84754447	rs61770364:85217431:G:A	84751748	84751748	0	1.56352e-11	-0.346518	0.0474675	-752598	Distal non-mGene
cg09062462	chr1	84754560	84754559	rs5775796:85218340:C:CT	84752657	84752657	0	2.10586e-11	-0.236757	0.0326755	-753507	Distal non-mGene
cg22372968	chr1	84758654	84758653	rs1750493:85224368:C:T	84758685	84758685	0	7.86529e-12	0.143396	0.0193127	-759535	Distal non-mGene
cg21986665	chr1	84759682	84759681	rs12049454:85228325:C:T	84762642	84762642	0	1.0666e-07	-0.158582	0.0283922	-763492	Distal non-mGene
cg14805718	chr1	85257586	85257585	rs3942955:85712287:C:T	85246604	85246604	1	2.02166e-07	0.574688	0.105445	-247457	Distal non-mGene
cg16011679	chr1	85259713	85259712	rs34729324:85726880:G:GA	85261197	85261197	0	2.24744e-24	0.234236	0.0191067	-264084	Distal non-mGene
cg14805718	chr1	85257586	85257585	rs2647395:85728664:C:G	85262981	85262981	0	1.30104e-25	-1.03539	0.0813869	-265868	Distal non-mGene
cg17737388	chr1	85258772	85258771	rs2647395:85728664:C:G	85262981	85262981	0	1.97953e-31	-0.594374	0.039848	-265868	Distal non-mGene
cg00576075	chr1	85259972	85259971	rs34642410:85776712:A:G	85311029	85311029	0	2.54981e-10	0.404837	0.0596893	397404	Distal non-mGene
cg04896168	chr1	86502861	86502860	rs35628188:86960721:T:TA	86495038	86495038	0	5.10202e-08	0.275618	0.0480255	-98696	Distal non-mGene
cg21695830	chr1	88991780	88991779	rs10922534:89457697:T:C	88992014	88992014	0	4.07356e-09	-0.363181	0.0581229	372044	Distal non-mGene
cg14669130	chr1	88993822	88993821	rs34074694:89462846:A:ATTAG	88997163	88997163	0	3.93266e-12	-0.170271	0.0225525	366895	Distal non-mGene
cg11309454	chr1	88993847	88993846	rs34074694:89462846:A:ATTAG	88997163	88997163	0	1.34883e-21	-0.413266	0.0368304	366895	Distal non-mGene
cg02420133	chr1	89364423	89364422	rs12758062:89832948:T:C	89367389	89367389	0	1.27606e-07	-0.116549	0.0210086	-374436	Distal non-mGene
cg21839260	chr1	89455341	89455340	rs716749:89930684:A:T	89465125	89465125	0	3.97076e-10	0.228066	0.0340471	-472172	Distal non-mGene
cg03145924	chr1	89762915	89762914	rs10922717:90248248:G:C	89782689	89782689	0	1.73069e-16	-0.19161	0.0206379	205255	Distal non-mGene
cg07998124	chr1	89794601	89794600	rs200520887:90263430:A:G	89797871	89797871	0	2.13239e-10	-0.148523	0.02179	190073	Distal non-mGene
cg06121193	chr1	89816853	89816852	rs151047311:90283067:T:TTAAG	89817508	89817508	0	8.09049e-14	-0.29059	0.0352826	170436	Distal non-mGene
cg24453699	chr1	90725335	90725334	rs114328297:91190854:T:G	90725297	90725297	0	2.10899e-26	0.492983	0.0378704	126360	Distal non-mGene
cg13456504	chr1	90726027	90726026	rs72720396:91191582:A:G	90726025	90726025	0	3.96752e-08	0.186305	0.0321725	125632	Distal non-mGene
cg22167515	chr1	90726910	90726909	rs12568187:91193691:T:C	90728134	90728134	0	3.67405e-07	0.258089	0.048496	123523	Distal non-mGene
cg12071888	chr1	90729603	90729602	rs12568187:91193691:T:C	90728134	90728134	0	6.51781e-08	0.146441	0.0257446	123523	Distal non-mGene
cg27594756	chr1	91404833	91404832	rs17131429:91870410:G:C	91404853	91404853	0	9.70178e-20	0.248971	0.0236592	16	Promoter mGene
cg09737265	chr1	91405157	91405156	rs17131429:91870410:G:C	91404853	91404853	0	7.54176e-12	-0.173171	0.0232991	16	Promoter mGene
cg07090678	chr1	91500583	91500582	rs13447454:91966406:G:A	91500849	91500849	0	3.86876e-08	0.244624	0.0422057	-95980	Distal non-mGene
ch.1.93237475F	chr1	92999331	92999330	rs532834:93468062:A:T	93002505	93002505	0	1.22148e-06	-0.122267	0.0241736	-40983	Distal non-mGene
cg09160344	chr1	93845838	93845837	rs12097812:94309777:T:C	93844221	93844221	0	8.48086e-10	0.181519	0.0276974	-396090	Distal non-mGene
cg16731318	chr1	93847788	93847787	rs12097812:94309777:T:C	93844221	93844221	0	3.84712e-38	0.62811	0.0358268	-396090	Distal non-mGene
cg20651314	chr1	93732688	93732687	rs143191232:94317436:A:T	93851880	93851880	0	1.61481e-06	-0.243269	0.0486999	-4730	Distal mGene
cg22475139	chr1	94092570	94092569	rs4147882:94558255:TA:T	94092699	94092700	0	1.83567e-10	0.189322	0.0276613	28433	Distal mGene
cg08916447	chr1	94117451	94117450	rs3838282:94583038:A:G	94117482	94117482	0	1.02405e-09	0.161903	0.0248418	3650	Distal mGene
cg22424108	chr1	94819976	94819975	rs6693769:95271529:T:C	94805973	94805973	0	3.49775e-11	0.130364	0.0182261	-387518	Distal non-mGene
cg24013761	chr1	94808614	94808613	rs6686047	94808408	94808408	0	1.74849e-25	-0.333088	0.0262815	-389953	Distal non-mGene
cg06578870	chr1	94856126	94856125	rs71652586:95321573:G:C	94856017	94856017	0	1.12455e-08	-0.222463	0.0367907	216928	Distal non-mGene
cg21562973	chr1	99809167	99809166	rs6688707:100268408:G:T	99802852	99802852	0	1.16526e-06	-0.0939463	0.0185357	542173	Distal non-mGene
cg24916377	chr1	99766639	99766638	1:100275518:CTT:C	99809962	99809964	0	1.77148e-07	0.196044	0.0357861	535063	Distal non-mGene
cg14553297	chr1	99850908	99850907	rs9887771:100276744:C:G	99811188	99811188	0	3.52732e-11	-0.227519	0.0318163	533837	Distal non-mGene
cg04308687	chr1	99766127	99766126	rs7543433:100277039:T:C	99811483	99811483	0	1.18193e-10	0.196393	0.0283526	533542	Distal non-mGene
cg20948262	chr1	99766422	99766421	rs7543433:100277039:T:C	99811483	99811483	0	2.38905e-08	0.19088	0.0323825	533542	Distal non-mGene
cg10018845	chr1	99766469	99766468	rs7543433:100277039:T:C	99811483	99811483	0	3.2938e-12	0.182604	0.0240845	533542	Distal non-mGene
cg25758167	chr1	99849535	99849534	rs7543433:100277039:T:C	99811483	99811483	0	1.17619e-25	-0.332113	0.0260721	533542	Distal non-mGene
cg01933228	chr1	99851082	99851081	rs7543433:100277039:T:C	99811483	99811483	0	1.5584e-25	-0.48027	0.0378387	533542	Distal non-mGene
cg03956908	chr1	99852266	99852265	rs7543433:100277039:T:C	99811483	99811483	0	3.95177e-08	-0.131207	0.0226546	533542	Distal non-mGene
cg27425127	chr1	99852666	99852665	rs7543433:100277039:T:C	99811483	99811483	0	5.46219e-30	-0.566793	0.039448	533542	Distal non-mGene
cg07750604	chr1	108113543	108113542	rs76976196:108657908:AT:A	108115286	108115287	0	1.66071e-09	0.184618	0.0287392	-150142	Distal non-mGene
cg06207961	chr1	108118609	108118608	rs1777448:108661274:C:T	108118652	108118652	0	2.81772e-14	0.18705	0.0222182	-153508	Distal non-mGene
cg23706211	chr1	109250233	109250232	rs59201433:109792735:A:ACGC	109250113	109250113	0	3.02021e-11	-0.11994	0.0167057	147838	Distal non-mGene
cg17243654	chr1	109273659	109273658	exm-rs599839	109279544	109279544	0	2.40237e-07	-0.138045	0.0255013	118407	Distal non-mGene
cg09502502	chr1	109283682	109283681	rs657420:109826136:C:T	109283514	109283514	0	1.51612e-19	0.354267	0.0339009	114437	Distal non-mGene
cg01526259	chr1	109392290	109392289	rs10858087:109916890:T:A	109374268	109374268	0	5.67647e-09	-0.171369	0.0277163	23683	Distal mGene
cg23387929	chr1	109535190	109535189	rs12135954:110077741:A:G	109535119	109535119	0	1.32794e-13	-0.227608	0.0279281	-51640	Distal non-mGene
cg17685210	chr1	110495688	110495687	rs815324	110496218	110496218	0	2.85936e-17	-0.2217	0.0231295	-345732	Distal non-mGene
cg01245068	chr1	110496341	110496340	rs815324	110496218	110496218	0	2.45489e-07	-0.100609	0.0186017	-345732	Distal non-mGene
cg07833779	chr1	111508151	111508150	rs12083507:112050944:G:A	111508322	111508322	0	1.58838e-23	0.648966	0.0543426	33896	Distal non-mGene
cg23175215	chr1	113073012	113073011	rs41283098:113615661:G:A	113073039	113073039	0	3.0812e-09	0.19328	0.030663	317710	Distal non-mGene
cg05114234	chr1	113073023	113073022	rs41283098:113615661:G:A	113073039	113073039	0	1.49143e-15	0.216403	0.0242571	317710	Distal non-mGene
cg02157078	chr1	114346148	114346147	rs559692:114888832:T:G	114346210	114346210	0	7.29919e-08	-0.181519	0.0320439	324212	Distal non-mGene
cg15558982	chr1	115089642	115089641	rs1146163:115654025:C:G	115111404	115111404	0	1.6753e-13	0.334025	0.041191	-256601	Distal non-mGene
cg01522456	chr1	115089616	115089615	rs10458452:115654244:T:G	115111623	115111623	0	8.96077e-17	0.246717	0.0262616	-256820	Distal non-mGene
cg14867388	chr1	115089633	115089632	rs10458452:115654244:T:G	115111623	115111623	0	2.82092e-14	0.947248	0.112519	-256820	Distal non-mGene
cg16942568	chr1	116018977	116018976	rs41313286:116676143:A:G	116133522	116133522	0	4.78957e-07	0.454685	0.0863713	345320	Distal non-mGene
cg01824919	chr1	116168719	116168718	rs10754433:116712676:C:G	116170055	116170055	0	6.07678e-12	-0.207306	0.0277459	308787	Distal non-mGene
cg15387962	chr1	116467623	116467622	rs1176386	116483534	116483534	0	4.56561e-07	-0.250704	0.0475292	-371779	Distal non-mGene
cg05149108	chr1	116467560	116467559	rs1176385:117027445:T:C	116484823	116484823	0	2.96333e-07	-0.203588	0.0379247	-373068	Distal non-mGene
cg11649715	chr1	119000818	119000817	rs2765539:119549418:C:T	119006795	119006795	0	1.67239e-18	0.454844	0.0452336	-821572	Distal non-mGene
cg21301805	chr1	118992022	118992021	rs6428789:119550480:A:C	119007857	119007857	0	1.06382e-10	0.210414	0.0302908	-822634	Distal non-mGene
cg07572770	chr1	147242267	147242266	rs12092016:146716994:C:G	147245342	147245342	0	1.2834e-11	0.243161	0.033146	-72792	Distal non-mGene
cg21917976	chr1	147242310	147242309	rs12092016:146716994:C:G	147245342	147245342	0	8.26997e-13	0.177657	0.0226944	-72792	Distal non-mGene
cg11120551	chr1	147242347	147242346	rs12092016:146716994:C:G	147245342	147245342	0	6.09879e-13	0.172255	0.021854	-72792	Distal non-mGene
cg11983977	chr1	147242370	147242369	rs12092016:146716994:C:G	147245342	147245342	0	3.75266e-17	0.303415	0.0318048	-72792	Distal non-mGene
cg22697853	chr1	148264934	148264933	rs7519981:147777876:C:G	148305768	148305768	0	2.19874e-09	0.237363	0.0372667	-2378510	Distal non-mGene
cg13067553	chr1	148310345	148310344	rs7519981:147777876:C:G	148305768	148305768	0	7.87559e-12	0.205874	0.0277282	-2378510	Distal non-mGene
cg26935976	chr1	151972710	151972709	rs34457813:151898453:AT:A	151925977	151925978	0	1.29037e-06	-0.241852	0.0479333	68554	Distal non-mGene
cg20694572	chr1	152359054	152359053	rs1496042:152159773:C:T	152187297	152187297	0	7.20456e-08	0.230048	0.0405913	-19172	Distal non-mGene
cg00888758	chr1	152224199	152224198	rs10788825:152161709:G:A	152189233	152189233	1	2.76443e-07	0.597471	0.110989	-21108	Distal non-mGene
cg24384181	chr1	152568109	152568108	rs12081753:152593844:C:T	152621368	152621368	0	4.94094e-08	0.237786	0.0413857	-40864	Distal non-mGene
cg03277515	chr1	153348723	153348722	rs4845345:153324212:T:G	153351736	153351736	0	1.89477e-11	-0.1669	0.022973	149028	Distal non-mGene
cg11343894	chr1	153627229	153627228	rs36115422:153646446:CT:C	153673970	153673971	0	2.45755e-10	0.135069	0.0198941	316789	Distal non-mGene
cg22861691	chr1	153671347	153671346	rs6674929:153648661:A:G	153676185	153676185	0	4.00562e-10	0.0937776	0.0140032	310173	Distal non-mGene
cg22176994	chr1	153633865	153633864	rs11264236:153658480:G:A	153686004	153686004	0	1.45932e-06	0.118792	0.023673	300354	Distal non-mGene
cg13364689	chr1	154559418	154559417	exm2259811	154559434	154559434	0	1.00607e-09	0.477734	0.0732634	310846	Distal non-mGene
cg24498305	chr1	154568429	154568428	rs111467941:154535000:T:TA	154562524	154562524	0	3.89439e-11	0.30479	0.0427308	393599	Distal non-mGene
cg22505006	chr1	155009354	155009353	rs6686021:154983539:C:T	155011063	155011063	0	8.47667e-08	-0.144692	0.0256842	22761	Distal non-mGene
cg21504176	chr1	155033643	155033642	rs4845704:155008318:C:A	155035842	155035842	0	2.19073e-11	-0.176724	0.0244145	-33212	Distal non-mGene
cg23973274	chr1	155087697	155087696	rs4845708:155053728:C:T	155081252	155081252	0	5.46309e-21	-0.351886	0.0320098	-579139	Distal non-mGene
cg08783638	chr1	155934957	155934956	rs61540196:155907151:C:CT	155937360	155937360	0	1.4778e-06	-0.153157	0.0305386	69710	Distal non-mGene
cg12639442	chr1	156084594	156084593	rs74965833:156054119:C:T	156084328	156084328	0	7.71618e-08	0.194187	0.0343504	128654	Distal non-mGene
cg00107970	chr1	156149667	156149666	rs536857:156111287:A:G	156141496	156141496	0	2.27267e-07	-0.0935596	0.0172456	71486	Distal non-mGene
cg12689752	chr1	156525762	156525761	rs7533916:156492927:A:C	156523135	156523135	0	2.6422e-17	0.461416	0.0480726	68627	Distal non-mGene
cg10640435	chr1	156624897	156624896	rs11576266:156572159:A:G	156602367	156602367	0	4.54104e-08	0.144272	0.025034	-145790	Distal non-mGene
cg04127455	chr1	156602940	156602939	rs6427323:156577789:G:C	156607997	156607997	0	7.94895e-07	-0.139936	0.027155	-238785	Distal non-mGene
cg15351573	chr1	156735608	156735607	rs12125515:156709602:T:G	156739810	156739810	0	8.72097e-08	0.20009	0.0355554	27115	Distal non-mGene
cg22546158	chr1	160176607	160176606	exm2268770	160175105	160175105	0	7.1775e-08	0.18573	0.032767	87426	Distal non-mGene
cg08279665	chr1	160176363	160176362	rs7519748:160151450:T:C	160181660	160181660	0	7.31112e-18	0.36377	0.0370754	80871	Distal non-mGene
cg11161846	chr1	161020663	161020662	rs11588189:161019621:C:T	161049831	161049831	0	1.05433e-07	-0.239452	0.0428525	102945	Distal non-mGene
cg25548811	chr1	161021384	161021383	rs11588189:161019621:C:T	161049831	161049831	0	1.37283e-07	-0.302421	0.0546654	102945	Distal non-mGene
cg21091503	chr1	161201996	161201995	rs145629160:161175652:T:A	161205862	161205862	0	1.09858e-14	0.716762	0.0835309	108395	Distal non-mGene
cg07580762	chr1	161202021	161202020	rs145629160:161175652:T:A	161205862	161205862	0	1.023e-30	1.08753	0.0742632	108395	Distal non-mGene
cg21691116	chr1	161202030	161202029	rs145629160:161175652:T:A	161205862	161205862	0	2.32804e-19	0.765329	0.0737329	108395	Distal non-mGene
cg02954704	chr1	161379217	161379216	rs4534404:161348992:T:C	161379202	161379202	0	1.28212e-22	-0.73651	0.0634747	-182098	Distal non-mGene
cg25597117	chr1	161379327	161379326	rs4534404:161348992:T:C	161379202	161379202	0	9.89824e-21	-0.887093	0.0814132	-182098	Distal non-mGene
cg13092735	chr1	162382696	162382695	rs2655731:162363891:T:C	162394101	162394101	0	7.80559e-09	-0.106457	0.0173957	-324327	Distal non-mGene
cg12406726	chr1	162822779	162822778	rs10799873:162815806:G:A	162846016	162846016	0	9.41119e-10	-0.200309	0.0306582	475775	Distal non-mGene
cg06092702	chr1	163423120	163423119	rs4657268:163376507:A:T	163406717	163406717	0	2.90276e-08	-0.205464	0.035093	1148867	Distal non-mGene
cg02449975	chr1	165602044	165602043	rs10800113:165571573:A:G	165602336	165602336	0	3.14102e-07	-0.0988985	0.018466	225195	Distal non-mGene
cg15224822	chr1	165769517	165769516	rs11430311:165687073:A:AT	165717836	165717836	0	2.64014e-07	0.254597	0.0472085	109695	Distal non-mGene
cg03433241	chr1	166884042	166884041	rs7542169:166864373:A:G	166895136	166895136	0	1.04527e-06	0.0734293	0.0144188	623474	Distal non-mGene
cg06665322	chr1	167090129	167090128	rs4657622:167020322:A:T	167051085	167051085	0	2.20864e-07	0.177051	0.0325987	-75603	Distal non-mGene
cg00109164	chr1	167053375	167053374	rs60547385:167021730:GC:G	167052493	167052494	0	3.12447e-22	0.495502	0.043243	-77011	Distal non-mGene
cg24693760	chr1	167540682	167540681	rs16859159	167538620	167538620	0	9.11612e-35	1.02747	0.0634171	-372141	Distal non-mGene
cg26204283	chr1	169794322	169794321	rs79945836:169763807:G:C	169794666	169794666	0	1.09973e-14	0.455344	0.0530666	99601	Distal non-mGene
cg09423316	chr1	171248584	171248583	kgp6353310	171248552	171248552	0	3.72654e-31	-1.38664	0.0936208	65656	Distal non-mGene
cg15415901	chr1	171248619	171248618	kgp6353310	171248552	171248552	0	1.02847e-27	-1.19448	0.0884156	65656	Distal non-mGene
cg14848555	chr1	171781658	171781657	rs909958:171763522:C:A	171794382	171794382	0	4.18536e-18	0.223871	0.0226042	47116	Distal non-mGene
cg16409744	chr1	171781643	171781642	rs2232826:171765591:G:A	171796451	171796451	0	9.22342e-12	0.167678	0.0226712	45047	Distal non-mGene
cg20800956	chr1	171842338	171842337	rs2421947:171833094:C:G	171863954	171863954	0	1.07295e-42	0.569462	0.0293758	-22456	Distal mGene
cg11721910	chr1	172775778	172775777	rs1476423:172744934:C:T	172775794	172775794	0	7.91939e-10	0.18943	0.0288468	431519	Distal non-mGene
cg12958175	chr1	174447909	174447908	rs114622977:173841361:C:T	173872223	173872223	0	9.82187e-18	-1.10799	0.113492	-410861	Distal non-mGene
cg02222678	chr1	175314457	175314456	rs12566648:175282246:G:C	175313110	175313110	0	1.21799e-06	0.083847	0.0165754	-120111	Distal non-mGene
cg25546992	chr1	176553353	176553352	rs11590528:176530278:C:T	176561142	176561142	0	2.41563e-07	0.123818	0.0228781	603831	Distal non-mGene
cg25103155	chr1	176881319	176881318	rs6425399:176866594:A:T	176897458	176897458	0	4.77181e-07	0.118039	0.022419	274039	Distal non-mGene
cg19161000	chr1	177182485	177182484	rs10913296:177154031:G:A	177184895	177184895	0	1.96422e-16	0.55363	0.0597672	-19922	Distal non-mGene
cg02102020	chr1	177181654	177181653	rs59614546:177156370:C:T	177187234	177187234	0	1.76807e-13	0.604737	0.0746612	-22261	Distal non-mGene
cg04465928	chr1	178010998	178010997	rs36092773:177982928:G:T	178013793	178013793	0	9.49551e-10	-0.246741	0.0377747	80348	Distal non-mGene
cg00255405	chr1	179366464	179366463	rs16854003:179336996:G:A	179367861	179367861	0	7.27752e-12	0.188891	0.025392	-342057	Distal non-mGene
cg09505809	chr1	180154088	180154087	rs6425611:180127107:A:C	180157972	180157972	0	7.20397e-07	0.142513	0.027539	-280169	Distal non-mGene
cg02084211	chr1	180187018	180187017	rs3753800:180140508:T:C	180171373	180171373	0	8.89819e-20	0.386481	0.0366772	-428210	Distal non-mGene
cg06972794	chr1	180236134	180236133	rs357069:180221084:T:C	180251949	180251949	0	7.27292e-07	0.133723	0.025851	251005	Distal non-mGene
cg20955417	chr1	182085270	182085269	rs10911013:182051119:C:T	182081984	182081984	0	1.26881e-27	-0.339056	0.0251609	-668882	Distal non-mGene
cg17999527	chr1	182391785	182391784	rs912902:182360930:A:G	182391795	182391795	0	2.66448e-14	0.143473	0.0170226	-305244	Distal non-mGene
cg26135716	chr1	182391768	182391767	rs6424854:182371323:T:C	182402188	182402188	0	3.94933e-19	0.284676	0.0276572	-315637	Distal non-mGene
cg20229934	chr1	182589182	182589181	rs620070:182556330:T:C	182587195	182587195	0	6.60911e-14	0.259149	0.0313315	202098	Distal non-mGene
cg02349066	chr1	182588412	182588411	rs610367:182571003:C:T	182601868	182601868	0	1.59429e-17	0.448772	0.0463496	187425	Distal non-mGene
cg27563952	chr1	182588848	182588847	rs610367:182571003:C:T	182601868	182601868	0	3.87182e-24	0.597107	0.0490593	187425	Distal non-mGene
cg05616021	chr1	182589234	182589233	rs610367:182571003:C:T	182601868	182601868	0	9.63737e-18	0.37299	0.0381933	187425	Distal non-mGene
cg10931420	chr1	182589273	182589272	rs610367:182571003:C:T	182601868	182601868	0	2.12954e-24	0.465762	0.0379652	187425	Distal non-mGene
cg00837947	chr1	182589414	182589413	rs610367:182571003:C:T	182601868	182601868	0	3.42275e-19	0.33869	0.0328299	187425	Distal non-mGene
cg19841283	chr1	182589636	182589635	rs610367:182571003:C:T	182601868	182601868	0	1.65303e-25	0.649373	0.0512003	187425	Distal non-mGene
cg02025632	chr1	182589721	182589720	rs610367:182571003:C:T	182601868	182601868	0	4.16276e-15	0.206993	0.0236652	187425	Distal non-mGene
cg08156924	chr1	182589741	182589740	rs610367:182571003:C:T	182601868	182601868	0	8.71287e-21	0.299079	0.0273958	187425	Distal non-mGene
cg08554947	chr1	183633974	183633973	rs17488675:183592570:C:T	183623435	183623435	0	1.78337e-10	-0.229644	0.033526	-204833	Distal non-mGene
cg26816907	chr1	197921683	197921682	rs13376365:197890802:T:C	197921672	197921672	0	9.93751e-08	0.220562	0.0393845	-145976	Distal non-mGene
cg00114966	chr1	197924791	197924790	1:197894018:AT:A	197924888	197924889	0	5.08243e-18	-0.252602	0.0255881	-149192	Distal non-mGene
cg21146967	chr1	200625519	200625518	rs2808253:200593169:A:C	200624041	200624041	0	1.76924e-20	-0.216517	0.0200452	115517	Distal non-mGene
cg22213391	chr1	200891410	200891409	rs2279944:201012247:C:T	201043119	201043119	0	4.0333e-09	-0.194833	0.031171	-422385	Distal non-mGene
cg17766148	chr1	201114995	201114994	rs4498834:201080298:T:C	201111170	201111170	0	9.15014e-18	0.425392	0.0435207	1396	Promoter non-mGene
cg01987224	chr1	201115339	201115338	rs4498834:201080298:T:C	201111170	201111170	0	9.6882e-08	0.0882942	0.0157512	1396	Promoter non-mGene
cg00891176	chr1	201113604	201113603	rs2281846:201081777:C:G	201112649	201112649	0	2.3053e-09	0.157988	0.0248406	-83	Promoter mGene
cg23594461	chr1	201119410	201119409	rs2281845	201112815	201112815	0	1.73342e-15	0.227926	0.025622	-249	Promoter non-mGene
cg19765450	chr1	201112255	201112254	rs78013107:201085321:G:A	201116193	201116193	0	6.03999e-08	0.176469	0.0309376	-3627	Distal mGene
cg08885800	chr1	201114992	201114991	rs7516023:201085521:C:T	201116393	201116393	0	6.40625e-24	0.512699	0.0424088	-3827	Distal non-mGene
cg27432477	chr1	201267648	201267647	rs3738270	201225991	201225991	0	7.77592e-08	-0.143834	0.0254505	-113425	Distal non-mGene
cg05184311	chr1	201284410	201284409	rs7536832:201218893:T:C	201249765	201249765	0	9.44595e-08	0.159614	0.0284474	127997	Distal non-mGene
cg10799510	chr1	201266931	201266930	rs11801270:201234486:T:C	201265358	201265358	0	3.47082e-09	-0.189045	0.0301027	18094	Distal non-mGene
cg07302580	chr1	201267052	201267051	rs11801270:201234486:T:C	201265358	201265358	0	1.3291e-11	-0.209073	0.0285241	18094	Distal non-mGene
cg16819028	chr1	201282855	201282854	rs12117501:201236429:T:C	201267301	201267301	0	1.17071e-11	-0.320548	0.0435954	16151	Distal mGene
cg18153027	chr1	201269283	201269282	rs12117501:201236429:T:C	201267301	201267301	0	1.95904e-07	-0.242513	0.0444422	16151	Distal non-mGene
cg19764279	chr1	201270229	201270228	rs12129670:201237806:C:T	201268678	201268678	0	1.45969e-14	-0.683136	0.0800673	14774	Distal non-mGene
cg00578673	chr1	201226086	201226085	rs4915503:201240763:T:C	201271635	201271635	0	1.1757e-07	0.07456	0.0133983	106127	Distal non-mGene
cg13877974	chr1	201739761	201739760	rs12404359:201682660:C:A	201713532	201713532	0	4.41615e-10	0.264867	0.0396606	-90647	Distal mGene
cg06775570	chr1	201888494	201888493	rs11589881:201861481:C:T	201892353	201892353	0	7.77239e-16	0.190769	0.0211226	63138	Distal non-mGene
cg11586189	chr1	201888464	201888463	rs4025034:201871833:A:C	201902705	201902705	0	6.57401e-15	0.175885	0.0202896	43883	Distal non-mGene
cg14263176	chr1	201888660	201888659	rs35349183:201873143:A:G	201904015	201904015	0	7.84248e-11	0.186332	0.0266066	42573	Distal non-mGene
cg22572173	chr1	201888623	201888622	rs113195075:201929527:C:CA	201960399	201960399	1	4.85913e-07	-1.11554	0.212033	-71719	Distal mGene
cg03981535	chr1	201982107	201982106	rs10800804:201949888:C:T	201980760	201980760	0	3.97253e-17	-0.256237	0.0268863	-92080	Distal non-mGene
cg04833017	chr1	201982272	201982271	rs12059693:201953994:A:G	201984866	201984866	0	8.10414e-28	-0.415163	0.0306423	-96186	Distal non-mGene
cg12479090	chr1	201983674	201983673	rs12059693:201953994:A:G	201984866	201984866	0	1.87955e-16	0.209611	0.0226105	-96186	Distal non-mGene
cg20362147	chr1	201983451	201983450	rs16849483	201990327	201990327	0	1.24529e-27	0.28535	0.0211707	132531	Distal non-mGene
cg26045471	chr1	202002606	202002605	rs59698324:201965855:C:T	201996727	201996727	0	6.53665e-12	-0.243662	0.0326694	148016	Distal non-mGene
cg26455554	chr1	202002678	202002677	rs59698324:201965855:C:T	201996727	201996727	0	3.1617e-26	-0.64653	0.0499182	148016	Distal non-mGene
cg16047663	chr1	202005914	202005913	rs143195550:201966295:TG:T	201997167	201997168	0	8.36606e-08	0.142824	0.0253402	147576	Distal non-mGene
cg08811228	chr1	202129963	202129962	rs6676433:202093628:A:G	202124500	202124500	0	6.08341e-10	-0.282158	0.0426396	-142128	Distal non-mGene
cg08129759	chr1	202122817	202122816	rs145143726:202685193:AAAACAAAC:A	202716065	202716073	0	9.50473e-07	0.119348	0.0233388	-367366	Distal non-mGene
cg24880665	chr1	202803037	202803036	rs34765241:202695531:T:C	202726403	202726403	0	5.62191e-09	0.232309	0.0375607	-384423	Distal non-mGene
cg10734950	chr1	202809638	202809637	rs10699901:202778804:A:AAG	202809676	202809676	0	2.39534e-21	-0.262497	0.0235903	51944	Distal non-mGene
cg21105875	chr1	202809742	202809741	rs10699901:202778804:A:AAG	202809676	202809676	0	1.49241e-07	-0.341683	0.06196	51944	Distal non-mGene
cg19895521	chr1	202862969	202862968	rs2298261	202857410	202857410	0	5.73655e-14	-0.623394	0.0751458	-47940	Distal non-mGene
cg07771034	chr1	202967423	202967422	rs35356717:202936527:G:T	202967399	202967399	0	3.40835e-08	0.141794	0.0243549	-38763	Distal non-mGene
cg09449562	chr1	203031615	203031614	rs782793:203000431:C:T	203031303	203031303	0	1.39717e-13	-0.207815	0.0255273	242338	Distal non-mGene
cg00805880	chr1	203075917	203075916	rs11806388:203027354:C:A	203058226	203058226	0	4.76618e-12	-0.151749	0.0201917	215415	Distal non-mGene
cg07972572	chr1	203267942	203267941	rs55815277:203239394:TC:T	203270266	203270267	0	9.80059e-11	-0.179607	0.0257991	-243768	Distal non-mGene
ch.1.3947147F	chr1	203724636	203724635	rs7533409:203674637:C:T	203705509	203705509	0	7.44619e-24	-0.457794	0.0379438	-354020	Distal non-mGene
cg06642677	chr1	203860648	203860647	rs368189070:203828803:TCTC:T	203859675	203859678	0	5.73954e-20	0.594138	0.0560025	213440	Distal non-mGene
cg23035341	chr1	203860354	203860353	rs5780200:203829005:A:AT	203859877	203859877	0	1.46968e-14	0.215184	0.0252243	213238	Distal non-mGene
cg15481791	chr1	203860763	203860762	rs5780200:203829005:A:AT	203859877	203859877	0	1.1397e-11	-0.224598	0.0305257	213238	Distal non-mGene
cg16674699	chr1	204179104	204179103	rs7513165:204147186:T:C	204178058	204178058	0	3.86654e-09	0.119675	0.0191211	199607	Distal non-mGene
cg11968713	chr1	204196982	204196981	rs72749756:204175367:C:T	204206239	204206239	0	2.37799e-08	-0.20833	0.0353373	171426	Distal non-mGene
cg05606799	chr1	204196180	204196179	rs4534452:204185184:A:G	204216056	204216056	0	4.62543e-12	-0.159828	0.0212515	161609	Distal non-mGene
cg20034980	chr1	204377807	204377806	rs10494854	204354746	204354746	0	1.18692e-06	-0.0794165	0.0156817	-164422	Distal non-mGene
cg15097530	chr1	204517267	204517266	rs4252718:204512195:A:T	204543067	204543067	0	1.76715e-07	0.12874	0.023498	285584	Distal non-mGene
cg09481780	chr1	204984678	204984677	rs2290138:204956325:G:C	204987197	204987197	0	2.65697e-41	-0.672147	0.0357329	55740	Distal non-mGene
cg14957195	chr1	205003162	205003161	rs2802839:204972288:G:T	205003160	205003160	0	9.06606e-28	-0.502673	0.0371514	81300	Distal non-mGene
cg01243924	chr1	205069658	205069657	rs2305275:205038731:C:T	205069603	205069603	0	1.22464e-15	0.181011	0.0202143	-240952	Distal non-mGene
cg00142815	chr1	205269131	205269130	rs61823972:205201325:A:C	205232197	205232197	0	1.04554e-07	0.12072	0.0215974	-4021	Distal mGene
cg10768996	chr1	205266875	205266874	rs1172113:205226288:T:C	205257160	205257160	0	1.2339e-12	0.176734	0.0227832	-28984	Distal mGene
cg02716605	chr1	205269702	205269701	rs1668868:205240141:G:T	205271013	205271013	0	5.79378e-07	0.113217	0.0216775	50778	Distal non-mGene
cg13459217	chr1	205357310	205357309	rs61823092:205295907:C:T	205326779	205326779	0	9.73067e-07	0.126405	0.0247442	-98603	Distal non-mGene
cg09662818	chr1	205357724	205357723	rs1857508:205327083:G:C	205357955	205357955	0	6.87753e-08	-0.163562	0.028811	146640	Distal non-mGene
cg13935009	chr1	205528586	205528585	rs7531230:205498021:T:C	205528893	205528893	0	1.10974e-13	0.2027	0.0247768	-171803	Distal non-mGene
cg12481266	chr1	205592679	205592678	rs35117752:205561913:T:TC	205592785	205592785	0	1.98415e-22	0.419283	0.0363573	87674	Distal non-mGene
cg00855731	chr1	205592779	205592778	rs35117752:205561913:T:TC	205592785	205592785	0	1.68013e-16	0.623168	0.0670844	87674	Distal non-mGene
cg00822735	chr1	205842002	205842001	rs823154	205793278	205793278	0	1.78437e-11	-0.255121	0.0350634	150182	Distal non-mGene
cg03827427	chr1	205813882	205813881	rs823074:205774839:T:C	205805711	205805711	0	2.72997e-17	-0.251373	0.0262041	197750	Distal non-mGene
cg07167872	chr1	205850336	205850335	rs823074:205774839:T:C	205805711	205805711	0	1.55865e-30	0.7895	0.0541689	197750	Distal non-mGene
cg16334093	chr1	205850473	205850472	rs823074:205774839:T:C	205805711	205805711	0	1.92287e-26	0.485945	0.0372867	197750	Distal non-mGene
cg26605225	chr1	206511587	206511586	rs61263066:206699602:A:AGTGTGTGTGTGTGTGT	206526269	206526269	0	9.39719e-10	0.145983	0.0223424	444356	Distal non-mGene
cg23576477	chr1	206714366	206714365	rs4077462:206910120:G:A	206736775	206736775	0	3.1163e-08	0.381738	0.0653625	160668	Distal non-mGene
cg02669047	chr1	206757889	206757888	rs10494878:206915809:A:G	206742464	206742464	0	6.661e-07	-0.177294	0.0341464	180783	Distal non-mGene
cg24727952	chr1	207466973	207466972	rs2661361	207404849	207404849	0	1.87181e-07	0.140517	0.0257051	-370483	Distal non-mGene
cg00085493	chr1	207866859	207866858	rs926628:208040165:T:C	207866820	207866820	0	3.39209e-10	0.245431	0.0364767	12276	Distal non-mGene
cg27566858	chr1	207910755	207910754	rs56404247:208055844:C:T	207882499	207882499	0	2.07136e-08	0.279027	0.0471048	-3403	Distal non-mGene
cg15031826	chr1	207963608	207963607	rs12753391:208136930:C:A	207963585	207963585	0	8.24468e-09	0.110273	0.0180515	-84489	Distal non-mGene
cg04277893	chr1	207955640	207955639	rs34388352:208137728:A:AT	207964383	207964383	0	2.80319e-08	0.123012	0.0209847	-85287	Distal non-mGene
cg04060051	chr1	209590677	209590676	rs2076223:209773960:A:G	209600615	209600615	0	1.02574e-30	0.402971	0.0275181	123510	Distal non-mGene
cg14423246	chr1	209845314	209845313	rs68084857:210002837:TC:T	209829492	209829493	0	1.03717e-18	-0.315735	0.0311554	108682	Distal non-mGene
cg10074409	chr1	209806033	209806032	rs3766614:210019701:G:A	209846356	209846356	0	1.99575e-07	0.146903	0.0269405	91818	Distal non-mGene
cg06929287	chr1	209827848	209827847	rs583814	209847626	209847626	0	1.19583e-18	0.173003	0.0171108	90548	Distal non-mGene
cg09163369	chr1	209827722	209827721	rs2357231:210028454:G:T	209855109	209855109	0	1.71519e-11	-0.306229	0.0420459	83065	Distal non-mGene
cg23166289	chr1	209827738	209827737	rs2357231:210028454:G:T	209855109	209855109	0	3.17752e-10	-0.223708	0.0331872	83065	Distal non-mGene
cg02334877	chr1	210310899	210310898	rs12140824:210493496:G:A	210320151	210320151	0	1.10446e-07	-0.155517	0.0278802	-381977	Distal non-mGene
cg23201092	chr1	210447143	210447142	1:210623951:C:CT	210450607	210450607	0	1.23825e-06	-0.124626	0.0246549	-122355	Distal mGene
cg20681671	chr1	211518364	211518363	rs11800588:211689466:A:C	211516124	211516124	0	6.7109e-40	-1.74309	0.09557	62618	Distal non-mGene
cg14017400	chr1	211681593	211681592	rs1773356:211854329:A:G	211680987	211680987	0	1.99416e-07	-0.132598	0.0243164	148859	Distal non-mGene
cg07170222	chr1	211675911	211675910	rs701920:211857157:C:T	211683815	211683815	0	3.44181e-08	0.107801	0.0185226	146031	Distal non-mGene
cg14231880	chr1	211676634	211676633	rs735834:211857690:A:G	211684348	211684348	0	2.51062e-12	0.159483	0.0209007	145498	Distal non-mGene
cg17241013	chr1	211675817	211675816	rs2794731:211868723:G:C	211695381	211695381	0	3.73326e-07	-0.0747852	0.0140616	135391	Distal non-mGene
cg01059126	chr1	212285688	212285687	rs351417:212450216:C:T	212276874	212276874	0	8.55603e-08	0.0583395	0.0103594	-241321	Distal non-mGene
cg09355428	chr1	212468058	212468057	rs7517259:212641356:A:G	212468014	212468014	0	1.51958e-10	-0.129954	0.0188893	-432461	Distal non-mGene
cg09732566	chr1	213015917	213015916	rs6540771:213170372:C:T	212997030	212997030	0	1.0848e-11	0.303881	0.041251	-331596	Distal non-mGene
cg18182483	chr1	215523829	215523828	rs4497183:215314010:C:A	215140667	215140667	0	1.11743e-06	-0.109237	0.0215129	-537472	Distal non-mGene
cg11598600	chr1	219220963	219220962	rs4846298:219584090:G:A	219410748	219410748	0	1.06815e-12	0.206754	0.0265654	-1125461	Distal non-mGene
cg13547337	chr1	219665761	219665760	rs71767721:219841036:CCAGA:C	219667694	219667698	0	1.44635e-18	-0.203385	0.0201783	-1382407	Distal non-mGene
cg01219672	chr1	220786745	220786744	rs12074049:220909579:G:A	220736237	220736237	0	7.16969e-10	-0.504357	0.076582	-463783	Distal non-mGene
cg11245333	chr1	220786590	220786589	rs11118598:220941444:G:A	220768102	220768102	0	1.71599e-10	-0.275971	0.0402468	-495648	Distal non-mGene
cg07185695	chr1	220786245	220786244	rs6541159:220949178:T:C	220775836	220775836	0	3.26495e-08	-0.26783	0.0459336	-729178	Distal non-mGene
cg04222084	chr1	221742309	221742308	rs4601596:221914458:C:T	221741116	221741116	0	4.08107e-08	-0.44986	0.0777631	323647	Distal non-mGene
cg16000154	chr1	224356803	224356802	rs11322243:224648475:GT:G	224460773	224460774	0	7.73457e-09	-0.157873	0.0257898	-346686	Distal non-mGene
cg21058413	chr1	224358035	224358034	rs35920703:224651116:C:CT	224463414	224463414	0	7.52425e-18	0.248479	0.0253372	-349327	Distal non-mGene
cg17839226	chr1	225478062	225478061	rs1340865:225631404:T:C	225443702	225443702	0	2.89027e-09	-0.12989	0.0205656	497787	Distal non-mGene
cg20329210	chr1	228378380	228378379	rs6426492:228322826:C:T	228135125	228135125	0	4.26885e-10	0.441837	0.0660959	-29714	Distal non-mGene
cg03054277	chr1	228212517	228212516	rs6682260:228351087:A:C	228163386	228163386	0	5.97031e-07	0.138023	0.0264606	-23424	Distal non-mGene
cg01557798	chr1	228212928	228212927	rs6682260:228351087:A:C	228163386	228163386	0	4.37033e-10	0.118932	0.0178034	-23424	Distal non-mGene
cg06564813	chr1	229249316	229249315	rs35750774:229388712:C:T	229252965	229252965	0	7.26332e-10	-0.266813	0.0405285	255376	Distal non-mGene
cg09410441	chr1	229614502	229614501	rs12742022:229756435:C:A	229620688	229620688	0	1.14204e-09	0.198585	0.0305688	437302	Distal non-mGene
cg09261111	chr1	229600532	229600531	rs3955545:229776053:C:T	229640306	229640306	0	1.37911e-07	-0.0962511	0.0174013	417684	Distal non-mGene
cg11352236	chr1	229614647	229614646	rs61825538:229786593:A:G	229650846	229650846	0	6.84809e-11	0.180606	0.0256965	775525	Distal non-mGene
cg00550925	chr1	230068227	230068226	rs6684422:230210365:A:T	230074618	230074618	0	3.22111e-08	0.126691	0.0217175	-16628	Distal mGene
cg16698674	chr1	230136612	230136611	1:230246459:C:T	230110712	230110712	0	5.69632e-12	-0.795609	0.106319	-52722	Distal mGene
cg16246661	chr1	230136865	230136864	1:230246459:C:T	230110712	230110712	0	8.50465e-19	-0.566248	0.0556955	-52722	Distal mGene
cg23735745	chr1	230112375	230112374	rs754665:230250297:T:C	230114550	230114550	0	7.67135e-22	-0.274399	0.0242562	-56560	Distal mGene
cg02931783	chr1	230112976	230112975	rs3033644:230258361:CTG:C	230122614	230122616	0	2.02074e-14	-0.220725	0.0260409	-64624	Distal mGene
cg22153407	chr1	230154343	230154342	rs11122401:230281068:G:A	230145321	230145321	0	1.66089e-16	-0.19288	0.0207593	-519087	Distal non-mGene
cg05784532	chr1	230148452	230148451	rs7551742:230290118:A:G	230154371	230154371	0	7.46122e-09	0.189159	0.0308645	-96381	Distal mGene
cg18187658	chr1	230158945	230158944	rs113806412:230294662:GTGTC:G	230158915	230158919	0	3.9967e-07	0.325436	0.0613609	-100925	Distal mGene
cg09880891	chr1	230159548	230159547	rs12065546:230295245:C:T	230159498	230159498	0	5.57103e-16	0.35135	0.038662	-101508	Distal mGene
cg22715072	chr1	230177899	230177898	rs627702:230324119:G:A	230188373	230188373	0	1.41209e-23	0.379067	0.0316914	-562139	Distal non-mGene
cg01960686	chr1	230286262	230286261	rs6698963:230415025:A:G	230279279	230279279	0	4.62863e-07	0.111812	0.0212097	-653045	Distal non-mGene
cg09938881	chr1	230321886	230321885	rs6541310:230421520:G:A	230285774	230285774	0	1.92339e-07	0.113222	0.0207339	-659540	Distal non-mGene
cg16644209	chr1	230311207	230311206	rs77677190:230446985:C:T	230311239	230311239	0	1.0554e-10	-1.58582	0.228243	-802738	Distal non-mGene
cg16644209	chr1	230311207	230311206	rs78301264:230449464:C:T	230313718	230313718	1	1.92087e-11	0.92755	0.127717	-805217	Distal non-mGene
cg20853591	chr1	231407733	231407732	rs2808616:231554993:C:G	231419247	231419247	0	2.65857e-09	-0.152449	0.024075	-82143	Distal non-mGene
cg23162821	chr1	231528427	231528426	rs1765782	231575743	231575743	0	5.90906e-18	-0.284343	0.0288764	-238639	Distal non-mGene
cg19193962	chr1	231528440	231528439	rs1765782	231575743	231575743	0	1.10707e-20	-0.761664	0.0700193	-238639	Distal non-mGene
cg04892437	chr1	231602156	231602155	rs9651124:231736611:C:T	231600865	231600865	0	6.56606e-10	-0.301769	0.045704	-263761	Distal non-mGene
cg24169009	chr1	231897577	231897576	rs4649395:232763275:G:T	232627529	232627529	0	2.42581e-08	0.927337	0.157404	-1000714	Distal mGene
cg01402634	chr1	233296107	233296106	rs1294334:233443525:G:T	233307779	233307779	0	7.73396e-17	0.226597	0.024057	597154	Distal non-mGene
cg09674468	chr1	234164554	234164553	rs4261174:234205662:T:C	234069916	234069916	0	2.07329e-10	0.264446	0.0387671	-742148	Distal non-mGene
cg03802191	chr1	234479424	234479423	rs150138392:234622577:AAG:A	234486831	234486833	0	5.24137e-25	-0.292175	0.0233822	587389	Distal non-mGene
cg17707347	chr1	234479222	234479221	rs271744:234623253:C:T	234487507	234487507	0	4.80641e-13	-0.250206	0.0315752	586713	Distal non-mGene
cg11137277	chr1	234479491	234479490	rs271744:234623253:C:T	234487507	234487507	0	1.08964e-17	-0.32728	0.0335827	586713	Distal non-mGene
cg13023668	chr1	234532621	234532620	rs271764:234673273:A:G	234537527	234537527	0	2.17758e-08	0.113463	0.0191875	536693	Distal non-mGene
cg02985240	chr1	235304834	235304833	rs144647926:235467607:G:A	235304292	235304292	0	1.3836e-21	0.678961	0.0605316	23927	Distal mGene
cg00874055	chr1	236143374	236143373	rs4006577:236301301:G:A	236138001	236138001	0	1.96404e-10	0.213022	0.0311819	210256	Distal non-mGene
cg10981580	chr1	236143468	236143467	rs4006577:236301301:G:A	236138001	236138001	0	2.58722e-10	0.167978	0.0247767	210256	Distal non-mGene
cg01567173	chr1	239955051	239955050	rs6693510:240118752:A:G	239955452	239955452	0	7.09393e-24	0.484665	0.0401449	-2093277	Distal non-mGene
cg09033006	chr1	244353876	244353875	rs4658633:244517238:A:G	244353936	244353936	0	6.75155e-09	-0.127293	0.0207029	3153122	Distal non-mGene
cg14240608	chr1	244652290	244652289	rs2653158:244815439:C:T	244652137	244652137	0	7.79136e-08	0.138025	0.0244245	-200003	Distal non-mGene
cg01905102	chr1	244652376	244652375	rs2653158:244815439:C:T	244652137	244652137	0	7.37837e-10	0.172341	0.0261902	-200003	Distal non-mGene
cg08289927	chr1	245043715	245043714	rs140218267:245129294:CA:C	244965992	244965993	0	4.86089e-08	-0.190277	0.0330975	-101450	Distal non-mGene
cg17094624	chr1	245091366	245091365	rs140218267:245129294:CA:C	244965992	244965993	0	6.12531e-10	0.184199	0.0278416	-101450	Distal non-mGene
cg06992877	chr1	244970195	244970194	rs7545078:245133489:T:G	244970187	244970187	0	1.39907e-13	0.252363	0.0310004	-317252	Distal non-mGene
cg19716264	chr1	245018849	245018848	rs61844237:245133662:G:C	244970360	244970360	0	3.91256e-28	0.476795	0.034885	-317425	Distal non-mGene
cg13296163	chr1	245153480	245153479	rs72775502:245316755:C:A	245153453	245153453	0	9.36439e-19	-0.460662	0.0453809	1353859	Distal non-mGene
cg09368188	chr1	245166717	245166716	rs12039117	245164783	245164783	0	1.71277e-20	0.528604	0.0489144	1342529	Distal non-mGene
cg24478129	chr1	246428822	246428821	rs55637336:246602482:C:G	246439180	246439180	0	2.89104e-14	-0.398164	0.0473197	68132	Distal mGene
cg04798314	chr1	246505300	246505299	rs4654117	246504928	246504928	0	2.64379e-39	-1.86462	0.1036	185119	Distal non-mGene
cg07044276	chr1	246696588	246696587	rs12132303:246853820:G:A	246690518	246690518	0	9.67146e-30	-1.03803	0.0727213	-183206	Distal non-mGene
cg02951974	chr1	246696655	246696654	rs12132303:246853820:G:A	246690518	246690518	0	8.82499e-25	-0.332911	0.0268238	-183206	Distal non-mGene
cg07018435	chr1	246696706	246696705	rs12132303:246853820:G:A	246690518	246690518	0	1.18486e-30	-0.486786	0.0332958	-183206	Distal non-mGene
cg14479354	chr1	246689978	246689977	rs12035469:246858531:G:A	246695229	246695229	0	3.696e-11	0.142144	0.0199013	-187917	Distal non-mGene
cg07044276	chr1	246696588	246696587	rs10802435:246859404:G:A	246696102	246696102	1	6.50652e-09	-0.641745	0.104249	-188790	Distal non-mGene
cg05157272	chr1	246698955	246698954	rs61202512:246860213:A:C	246696911	246696911	0	4.49725e-07	0.110766	0.0209862	-189599	Distal non-mGene
cg27515966	chr1	246699419	246699418	rs3007305:246862572:C:G	246699270	246699270	0	7.13741e-09	-0.172588	0.0281202	-191958	Distal non-mGene
cg12754571	chr1	247530970	247530969	rs4925558:247694370:G:C	247531068	247531068	0	4.89551e-10	0.340975	0.0512073	-3178433	Distal non-mGene
cg02104434	chr1	247531105	247531104	rs4925558:247694370:G:C	247531068	247531068	0	5.19042e-12	0.188501	0.0251334	-3178433	Distal non-mGene
cg04899629	chr1	247531230	247531229	rs4925558:247694370:G:C	247531068	247531068	0	1.56987e-12	0.293304	0.0380206	-3178433	Distal non-mGene
cg07313626	chr1	247518630	247518629	rs55852476:247696173:G:A	247532871	247532871	0	3.6951e-11	0.284248	0.0397968	-3180236	Distal non-mGene
cg17086421	chr10	3172163	3172162	rs9423712:3212795:C:G	3170603	3170603	0	1.21129e-08	0.124411	0.0206258	1507551	Distal non-mGene
cg05817476	chr10	3232428	3232427	rs60739495:3274346:C:G	3232154	3232154	0	1.8371e-07	0.112273	0.0205234	1446000	Distal non-mGene
cg17375863	chr10	3647241	3647240	rs7899426:3686167:C:G	3643975	3643975	0	8.11556e-08	-0.4249	0.0753023	141306	Distal non-mGene
cg26603656	chr10	5629145	5629144	rs10905489:5670541:G:C	5628578	5628578	0	8.87603e-20	-0.400791	0.0380337	-216027	Distal non-mGene
cg13562929	chr10	7252310	7252309	rs12412153:7301132:G:A	7259170	7259170	0	1.35258e-13	-0.196698	0.0241449	152316	Distal mGene
cg05103064	chr10	7269539	7269538	rs1977427	7267773	7267773	0	4.25326e-07	0.129397	0.0244601	143713	Distal mGene
cg16719077	chr10	7807149	7807148	rs2802460	7787074	7787074	0	4.09781e-31	-1.2496	0.0844576	31430	Distal non-mGene
cg10745532	chr10	7788697	7788696	rs1475406:7830319:G:C	7788356	7788356	0	5.74626e-11	0.192722	0.0272941	30148	Distal non-mGene
cg19582388	chr10	7818444	7818443	rs78092115:7859695:C:T	7817732	7817732	0	1.52377e-19	0.250995	0.0240204	-29751	Distal non-mGene
cg14071548	chr10	9304889	9304888	rs17640957:9385352:G:T	9343389	9343389	0	6.057e-09	-0.348093	0.056416	1455008	Distal non-mGene
cg18186241	chr10	11725025	11725024	rs35671765:11768891:C:G	11726892	11726892	0	9.57995e-09	0.165435	0.027215	-115138	Distal non-mGene
cg00673251	chr10	11742142	11742141	rs35994983:11790682:C:T	11748683	11748683	0	1.15817e-07	0.387639	0.0696182	-136929	Distal non-mGene
cg17782954	chr10	11741825	11741824	rs61844892:11805152:C:T	11763153	11763153	0	1.8171e-13	0.243925	0.0301329	-151399	Distal non-mGene
cg03854350	chr10	12269426	12269425	rs33932777:12311465:G:A	12269466	12269466	0	6.71755e-18	0.60558	0.0616324	80016	Distal non-mGene
cg20072505	chr10	12414491	12414490	rs11374541:12472882:T:TG	12430883	12430883	0	3.73298e-07	-0.172695	0.0324711	-81401	Distal mGene
cg27270981	chr10	12718438	12718437	rs78375658:12690334:C:T	12648335	12648335	0	1.88108e-08	0.218256	0.0367245	-298853	Distal mGene
cg13224914	chr10	12708370	12708369	rs10752272:12715060:G:T	12673061	12673061	0	6.59273e-09	-0.131595	0.0213861	-323579	Distal mGene
cg13897396	chr10	12728465	12728464	rs7077423	12729681	12729681	0	4.34419e-11	0.163014	0.0229189	369971	Distal non-mGene
cg04836423	chr10	12730042	12730041	rs151112881:12771928:T:TCGTCC	12729929	12729929	0	8.61042e-27	0.338969	0.0257508	369723	Distal non-mGene
cg14458563	chr10	13074698	13074697	rs4750308:13116699:C:A	13074699	13074699	0	7.29361e-22	-0.407734	0.0360165	-878734	Distal non-mGene
cg22472077	chr10	13299867	13299866	rs7914269:13343488:C:A	13301488	13301488	0	2.83445e-17	0.307473	0.0320731	-139934	Distal non-mGene
cg05810129	chr10	14555006	14555005	rs7083733:14581353:C:T	14539354	14539354	0	2.55424e-14	-0.339188	0.0402086	299221	Distal non-mGene
cg25731655	chr10	14560453	14560452	rs7083741:14581365:C:G	14539366	14539366	0	8.83689e-26	-0.4791	0.0374745	299209	Distal non-mGene
cg04004904	chr10	15096607	15096606	rs3814173:15139081:C:A	15097082	15097082	0	3.09152e-07	0.26622	0.0496761	-218396	Distal non-mGene
cg01003015	chr10	17229138	17229137	rs911608:17302736:A:G	17260737	17260737	0	2.18199e-16	0.111381	0.0120471	-130906	Distal non-mGene
cg07628813	chr10	17617985	17617984	10:17656472:T:TCTCAAACTCCTGGC	17614473	17614473	0	3.36662e-07	-0.466713	0.0873875	526204	Distal non-mGene
ch.10.21102959F	chr10	20774025	20774024	rs4748717:21051752:G:A	20762823	20762823	0	1.34181e-11	0.185853	0.0253621	-1714052	Distal non-mGene
cg25349828	chr10	21520464	21520463	rs11012726:21797272:T:C	21508343	21508343	0	1.2852e-08	0.203993	0.0338863	16332	Distal non-mGene
cg16063312	chr10	22436659	22436658	rs56768929:22721765:A:G	22432836	22432836	0	7.56048e-09	-0.307138	0.0501363	-429067	Distal non-mGene
cg02030592	chr10	22574116	22574115	rs7895322:22874383:G:A	22585454	22585454	0	1.44849e-23	0.742398	0.0620885	342570	Distal non-mGene
cg25383309	chr10	23003175	23003174	rs12259839:23290952:C:T	23002023	23002023	0	1.35746e-07	-0.341004	0.0616131	-998254	Distal non-mGene
cg24343755	chr10	26698159	26698158	rs1780185:26991179:G:A	26702250	26702250	0	3.61577e-08	0.146425	0.0252028	158837	Distal non-mGene
cg20679084	chr10	28677547	28677546	rs10458688:28956721:A:G	28667792	28667792	0	1.49272e-14	0.263581	0.0309071	621269	Distal non-mGene
cg18975376	chr10	28678337	28678336	rs10625795:28958604:T:TAA	28669675	28669675	0	1.1737e-09	0.192191	0.0296085	619386	Distal non-mGene
cg04192862	chr10	28677544	28677543	rs59827158:28968461:T:TA	28679532	28679532	0	2.48693e-12	0.219507	0.0287607	609529	Distal non-mGene
cg03496709	chr10	29409532	29409531	rs7922687:29686644:C:T	29397715	29397715	0	2.07344e-16	1.02385	0.110638	11687	Distal non-mGene
cg20673407	chr10	30752011	30752010	rs11008222	30753565	30753565	0	2.50309e-32	-1.45017	0.0950331	564930	Distal non-mGene
cg11198398	chr10	30765313	30765312	rs6481712:31051999:A:T	30763070	30763070	0	1.18105e-09	-0.177822	0.0274001	1165806	Distal non-mGene
cg21279476	chr10	31912542	31912541	rs1023207:32094890:C:A	31805962	31805962	0	3.28648e-17	0.252875	0.0264459	-1082711	Distal non-mGene
cg02093006	chr10	31913015	31913014	rs1023207:32094890:C:A	31805962	31805962	0	2.55258e-20	0.363369	0.0338283	-1082711	Distal non-mGene
cg04359828	chr10	31927104	31927103	rs1023207:32094890:C:A	31805962	31805962	0	6.17184e-28	0.663791	0.0488327	-1082711	Distal non-mGene
cg06271128	chr10	34666598	34666597	rs2490808:34922751:C:A	34633823	34633823	0	1.30479e-07	-0.210952	0.0380576	-1297561	Distal non-mGene
cg11150807	chr10	42859455	42859454	rs2796557:43358279:A:G	42862831	42862831	0	1.33274e-29	0.467494	0.0328726	214196	Distal non-mGene
cg03626285	chr10	43667344	43667343	rs3123663:44161143:A:G	43665695	43665695	0	5.1982e-07	0.106871	0.0203702	720798	Distal non-mGene
cg01083633	chr10	43667334	43667333	rs3128252:44167701:C:T	43672253	43672253	0	1.56125e-09	0.154659	0.0240308	714240	Distal non-mGene
cg01001533	chr10	43689421	43689420	rs2484664:44173392:G:A	43677944	43677944	0	1.26814e-11	0.781789	0.106536	708549	Distal non-mGene
cg12868173	chr10	43689650	43689649	rs17154135:44185453:A:G	43690005	43690005	0	2.63554e-07	0.870901	0.161475	696488	Distal non-mGene
cg11267527	chr10	44386487	44386486	rs35669959:44887911:A:G	44392463	44392463	0	1.04627e-09	-0.693021	0.106402	-763646	Distal non-mGene
cg09478712	chr10	44370633	44370632	rs67350917:44893481:G:A	44398033	44398033	0	1.38733e-09	-0.685395	0.106119	561656	Distal non-mGene
cg03444077	chr10	44864274	44864273	rs7917814:45359286:A:C	44863838	44863838	0	1.43399e-07	-0.206763	0.0374366	-1235021	Distal non-mGene
cg03865524	chr10	44865334	44865333	rs10751359:45360594:G:C	44865146	44865146	0	2.08947e-07	-0.120902	0.0222121	-1236329	Distal non-mGene
cg27009374	chr10	46284061	46284060	rs7071918:47652499:A:G	46281263	46281263	0	7.14684e-28	0.792992	0.0584405	-171642	Distal non-mGene
cg16299440	chr10	46108264	46108263	rs7095001:47654300:G:C	46283064	46283064	0	2.59148e-07	-0.163544	0.0303026	-173443	Distal non-mGene
cg22272458	chr10	46108199	46108198	rs11282368:47655510:A:AAGAGGAC	46284274	46284274	0	1.45004e-13	-0.365026	0.0448743	-174653	Distal mGene
cg01066431	chr10	47554165	47554164	rs143273522:49461502:T:A	48253459	48253459	0	1.45614e-06	0.356061	0.0709494	21411	Distal non-mGene
cg22670503	chr10	48274653	48274652	rs77504199:49496257:C:T	48288214	48288214	0	1.76603e-11	0.481499	0.0661593	-13344	Distal mGene
cg11034619	chr10	48274725	48274724	rs77504199:49496257:C:T	48288214	48288214	0	5.37531e-09	0.251651	0.0406297	-13344	Distal mGene
cg09101902	chr10	48655765	48655764	rs138429049:49863076:A:T	48655031	48655031	0	2.06846e-09	-0.274463	0.043011	533554	Distal non-mGene
cg04717834	chr10	50993506	50993505	rs2248908:52750665:C:T	50990905	50990905	0	2.41906e-12	0.188352	0.0246627	453	Promoter mGene
ch.10.1148322F	chr10	52005071	52005070	rs67853737:53772005:CTT:C	52012245	52012247	0	4.70932e-11	0.210011	0.0295884	-1020887	Distal mGene
cg16214148	chr10	52216941	52216940	rs72787319:53976957:C:T	52217197	52217197	0	7.83851e-15	-1.02777	0.118973	-1225839	Distal mGene
cg18694763	chr10	54802399	54802398	rs7922254:56562037:T:A	54802277	54802277	0	1.65504e-12	-0.29611	0.0384313	825665	Distal mGene
cg14090951	chr10	60123560	60123559	rs10761460:61883301:T:C	60123543	60123543	0	4.09563e-08	-0.168739	0.0291721	609947	Distal mGene
cg11524174	chr10	60201120	60201119	rs6479698:61956999:T:C	60197241	60197241	0	2.28223e-25	0.247871	0.0196246	536249	Distal mGene
cg20135031	chr10	60390663	60390662	rs7081073:61960705:C:T	60200947	60200947	0	9.96725e-07	-0.122364	0.0239781	532543	Distal mGene
cg15444369	chr10	60200428	60200427	rs7895510:61964948:G:A	60205190	60205190	0	7.04511e-07	0.109789	0.0211954	528300	Distal mGene
cg00236729	chr10	60650108	60650107	rs35856343:62412451:T:TA	60652693	60652693	0	2.02949e-09	-0.136754	0.0214183	80797	Distal non-mGene
cg13425605	chr10	60849396	60849395	rs2393702	60845098	60845098	0	9.78425e-09	-0.30554	0.0502979	156342	Distal non-mGene
cg03836675	chr10	69219182	69219181	rs10998652:70980862:C:T	69221106	69221106	0	2.82158e-07	-0.125193	0.0232754	48878	Distal non-mGene
cg00838397	chr10	69232470	69232469	rs7073527:70991851:G:A	69232095	69232095	0	2.21033e-14	-0.240873	0.0284699	37889	Distal non-mGene
cg00085593	chr10	69232598	69232597	rs7073527:70991851:G:A	69232095	69232095	0	4.72485e-07	-0.121052	0.0229819	37889	Distal non-mGene
cg12844338	chr10	69232850	69232849	rs7073527:70991851:G:A	69232095	69232095	0	3.1903e-18	-0.206673	0.0207736	37889	Distal non-mGene
cg11178592	chr10	69383549	69383548	rs4745984:71143488:C:A	69383732	69383732	0	2.76914e-13	0.234596	0.0292472	-151242	Distal non-mGene
cg11893281	chr10	69410099	69410098	rs1549800:71169302:A:T	69409546	69409546	0	1.17948e-18	0.540157	0.0534121	-177056	Distal non-mGene
cg27053588	chr10	70222481	70222480	rs113580605:71970723:G:C	70210967	70210967	0	3.47203e-12	-0.445898	0.0588849	171683	Distal non-mGene
cg15092703	chr10	70918302	70918301	rs117080158:72677211:C:T	70917454	70917454	0	5.0791e-09	-0.431445	0.0695321	295116	Distal non-mGene
cg00141366	chr10	71314834	71314833	rs7894968:73074278:G:C	71314521	71314521	0	7.05419e-17	0.219805	0.0232978	82413	Distal non-mGene
cg11061422	chr10	71377157	71377156	rs7924256:73137229:T:C	71377472	71377472	0	3.98063e-14	-0.550268	0.0658288	19462	Distal non-mGene
cg06441362	chr10	71377216	71377215	rs7924256:73137229:T:C	71377472	71377472	0	2.13297e-12	-0.450581	0.0588253	19462	Distal non-mGene
cg25577648	chr10	71377252	71377251	rs7924256:73137229:T:C	71377472	71377472	0	5.66229e-10	-0.244827	0.0369217	19462	Distal non-mGene
cg02442305	chr10	72215529	72215528	exm2217433	72215835	72215835	0	8.52013e-07	-0.44173	0.0859744	139395	Distal non-mGene
cg00564723	chr10	73872309	73872308	rs2242258	73847410	73847410	0	8.96992e-12	0.187096	0.0252794	27181	Distal mGene
cg19889307	chr10	74151672	74151671	rs10824133:76020585:G:A	74260827	74260827	0	4.0264e-12	0.214354	0.0284072	564755	Distal non-mGene
cg13814644	chr10	74102157	74102156	rs71021600:76044024:AT:A	74284266	74284267	0	1.65429e-21	-0.401648	0.0359013	541316	Distal non-mGene
cg09581513	chr10	75431320	75431319	rs55922628:77191441:C:A	75431683	75431683	0	1.33214e-14	0.113041	0.0132247	-230	Promoter mGene
cg17715668	chr10	75431903	75431902	rs55922628:77191441:C:A	75431683	75431683	0	1.68784e-15	0.18737	0.0210522	-230	Promoter mGene
cg00143643	chr10	75431305	75431304	rs55922628:77191441:C:A	75431683	75431683	0	6.7826e-11	0.175566	0.0249731	-230	Promoter non-mGene
cg23888215	chr10	77662547	77662546	rs2812415:79406970:C:G	77647212	77647212	0	1.17111e-06	0.196388	0.0387563	-8617	Distal non-mGene
cg03952049	chr10	77675784	77675783	rs2619647	77672409	77672409	0	4.77148e-09	0.196447	0.0315967	-33814	Distal non-mGene
cg07075322	chr10	78212633	78212632	rs1149740:79972524:G:A	78212767	78212767	0	2.76094e-08	-0.0982728	0.0167556	856268	Distal non-mGene
cg25613478	chr10	78212281	78212280	rs1249187	78213059	78213059	0	1.81932e-08	-0.086763	0.0145825	855976	Distal non-mGene
cg04411454	chr10	84212696	84212695	rs7073756:85963075:T:C	84203319	84203319	0	1.33365e-16	-0.241663	0.0259072	-63879	Distal non-mGene
cg00169964	chr10	84214417	84214416	rs7895139:85970100:A:C	84210344	84210344	0	1.34441e-10	-0.174832	0.025328	-70904	Distal non-mGene
cg07356745	chr10	84499933	84499932	rs10887311:86258770:A:G	84499014	84499014	0	1.59089e-16	-0.265922	0.0285985	-170428	Distal non-mGene
cg08040689	chr10	86364618	86364617	rs12251177:88130782:C:T	86371025	86371025	0	4.66447e-08	0.117013	0.0203235	-839910	Distal non-mGene
cg11911560	chr10	86694067	86694066	rs11312118:88451424:TC:T	86691667	86691668	0	1.98308e-17	-0.401934	0.0416682	64983	Distal non-mGene
cg18525126	chr10	86857704	86857703	rs11353145:88648583:CA:C	86888826	86888827	0	1.33161e-08	-0.145307	0.0241664	-220377	Distal non-mGene
cg27436777	chr10	88542185	88542184	rs1325899:90317327:G:T	88557570	88557570	0	7.56322e-13	0.213753	0.0272504	-716227	Distal non-mGene
cg02228714	chr10	92204543	92204542	rs141297800:93784488:A:AGTTTTTTT	92024731	92024731	0	3.73554e-07	0.131114	0.0246535	549345	Distal non-mGene
cg18197594	chr10	92575080	92575079	rs7916460:94204186:G:A	92444429	92444429	0	3.68166e-07	-0.252828	0.0475115	-153342	Distal non-mGene
cg02756614	chr10	93482355	93482354	rs7912414:95241680:G:A	93481923	93481923	0	2.33123e-07	0.230386	0.0425091	394	Promoter mGene
cg19166875	chr10	93482188	93482187	rs11187458:95245819:C:T	93486062	93486062	0	2.00265e-08	0.19096	0.0322004	-3745	Distal mGene
cg24371383	chr10	93496348	93496347	rs11187464:95253230:G:T	93493473	93493473	0	1.1801e-07	0.0972766	0.0174828	-11156	Distal non-mGene
cg08923894	chr10	94363416	94363415	rs12781451:96083920:G:A	94324163	94324163	0	1.28267e-11	-0.294166	0.0400981	-430190	Distal non-mGene
cg10266121	chr10	95260814	95260813	rs11188248:97001993:A:C	95242236	95242236	0	2.14365e-07	-0.181691	0.0334137	319178	Distal non-mGene
cg00240539	chr10	95374843	95374842	rs12217735:97143359:T:G	95383602	95383602	0	2.30086e-12	0.376543	0.0492465	273104	Distal non-mGene
cg22792461	chr10	96090566	96090565	rs12263592	96091675	96091675	0	4.01626e-09	-0.907037	0.145096	38040	Distal non-mGene
cg22792461	chr10	96090566	96090565	10:97885114:T:TGGGA	96125357	96125357	1	1.13503e-07	-1.78712	0.320714	-35119	Distal non-mGene
cg24105144	chr10	97427365	97427364	rs143830106:98992504:C:T	97232747	97232747	0	2.23096e-08	1.1818	0.200018	-46827	Distal non-mGene
cg13884649	chr10	96292848	96292847	rs143830106:98992504:C:T	97232747	97232747	0	3.2898e-08	-1.11368	0.19105	-46827	Distal non-mGene
cg22889914	chr10	97571576	97571575	rs12783481:99305631:T:C	97545874	97545874	0	1.858e-19	0.362423	0.0347924	-47080	Distal non-mGene
cg02363630	chr10	97772382	97772381	rs12415272	97712953	97712953	0	4.95238e-07	-0.0763343	0.0145204	-25630	Distal non-mGene
cg07307583	chr10	97647588	97647587	10:99490360:A:G	97730603	97730603	0	1.70071e-20	-1.13845	0.105335	-43280	Distal non-mGene
cg19043522	chr10	98467690	98467689	rs10786428:100219855:G:A	98460098	98460098	0	5.93347e-13	0.106621	0.0135187	775764	Distal mGene
cg20954376	chr10	98457973	98457972	rs35898407:100221150:A:G	98461393	98461393	0	6.04922e-10	-0.287222	0.0433979	774469	Distal mGene
cg20706651	chr10	99247004	99247003	rs2902264:100988933:A:T	99229176	99229176	0	4.88775e-16	-0.311087	0.0341487	6686	Distal non-mGene
cg19212550	chr10	100008152	100008151	rs7078766	100005136	100005136	0	4.52779e-09	-0.279511	0.0448822	4783	Distal mGene
cg27480065	chr10	101237814	101237813	rs11190870	101219450	101219450	0	9.94991e-08	-0.09422	0.0168251	351110	Distal non-mGene
cg06623385	chr10	101782995	101782994	rs2735421:103541016:T:G	101781259	101781259	0	3.19582e-07	-0.138361	0.0258523	-210699	Distal non-mGene
cg17782903	chr10	102102215	102102214	rs150492750:103772767:A:G	102013010	102013010	0	3.53609e-07	0.365316	0.0685379	-169090	Distal non-mGene
cg22749303	chr10	103069728	103069727	rs201571665:104675802:AATATATATATAT:A	102916045	102916057	0	2.05774e-08	0.280639	0.0473663	2248	Promoter mGene
cg11005552	chr10	103888381	103888380	rs147944736:105641935:G:GCAAGTGA	103882177	103882177	0	2.30023e-26	0.573438	0.0440987	-26634	Distal non-mGene
cg26888672	chr10	103895359	103895358	rs2067831:105643223:G:C	103883465	103883465	0	1.15417e-08	-0.124051	0.020533	-27922	Distal non-mGene
cg04246070	chr10	109852334	109852333	rs7918778:111611835:T:C	109852077	109852077	0	1.18945e-10	0.150629	0.0217495	-2687543	Distal non-mGene
cg14919929	chr10	116747372	116747371	rs10886009:118540458:C:G	116780947	116780947	0	1.92744e-08	-0.287979	0.0484966	68794	Distal non-mGene
cg06605803	chr10	116788292	116788291	rs75341625:118561234:T:A	116801723	116801723	0	1.47357e-12	-0.340582	0.0440847	367336	Distal non-mGene
cg09763162	chr10	116848963	116848962	rs71825189:119251056:CTG:C	117491545	117491547	0	2.17441e-08	0.289148	0.0488948	750019	Distal non-mGene
cg26495303	chr10	117532256	117532255	rs4752075:119290746:T:G	117531235	117531235	0	1.94941e-13	0.217081	0.0268576	710329	Distal non-mGene
cg04635997	chr10	117554561	117554560	rs201955119:119303891:TA:T	117544380	117544381	0	1.3825e-07	-0.163706	0.0295993	697184	Distal non-mGene
cg10846980	chr10	117546515	117546514	rs242962:119313030:G:T	117553519	117553519	0	7.05772e-08	-0.217152	0.0382869	688045	Distal non-mGene
cg16722154	chr10	118721634	118721633	rs1925942:120481153:T:C	118721641	118721641	0	3.78676e-19	-0.440007	0.0427195	-148770	Distal non-mGene
cg08023684	chr10	119687052	119687051	rs10886532:121447348:C:T	119687836	119687836	0	2.48647e-09	0.149789	0.0236061	204720	Distal non-mGene
cg07378239	chr10	120941707	120941706	rs7899002	120940986	120940986	0	1.13025e-08	-0.317211	0.0524687	795317	Distal non-mGene
cg12732162	chr10	121654411	121654410	rs17102382:123403856:C:T	121644342	121644342	0	3.75206e-07	0.226228	0.0425456	-663642	Distal non-mGene
cg27015047	chr10	122561290	122561289	rs11499293:124321265:C:T	122561749	122561749	0	1.63506e-12	0.226271	0.0293588	-290443	Distal non-mGene
cg13670099	chr10	122566100	122566099	rs3019532:124337674:A:G	122578158	122578158	0	7.50189e-17	-0.24847	0.0263648	-306852	Distal non-mGene
cg06020537	chr10	123559402	123559401	rs35428196:125318716:G:A	123559200	123559200	0	1.86735e-23	0.603857	0.0506767	-550221	Distal non-mGene
cg11715102	chr10	123970341	123970340	rs4077164:125727468:A:T	123967952	123967952	0	5.5409e-15	0.191035	0.0219633	-393725	Distal non-mGene
cg02313554	chr10	123972102	123972101	rs34456390:125738795:TA:T	123979279	123979280	0	2.36208e-15	0.328621	0.0371609	-405052	Distal non-mGene
cg03853151	chr10	124418919	124418918	rs2674346	124389557	124389557	0	7.73451e-13	0.152635	0.0194685	-397647	Distal non-mGene
cg10140171	chr10	124418969	124418968	rs2674346	124389557	124389557	0	1.84322e-24	0.402822	0.0327723	-397647	Distal non-mGene
cg25260426	chr10	124534428	124534427	rs60352465:126222962:A:C	124534393	124534393	0	1.26977e-34	-1.19444	0.0739783	257334	Distal non-mGene
cg23272266	chr10	124742971	124742970	rs2280450:126436279:C:T	124747710	124747710	0	2.05176e-11	0.159907	0.0220547	-285876	Distal non-mGene
cg27173819	chr10	132230132	132230131	rs4880242:134045394:C:T	132231890	132231890	0	7.84857e-09	0.154638	0.0252733	100264	Distal non-mGene
cg23771949	chr10	132351887	132351886	rs11146339:134158448:G:A	132344944	132344944	0	1.43234e-37	-1.0549	0.060961	-13097	Distal non-mGene
cg07149459	chr10	132331361	132331360	rs2474328:134161633:A:G	132348129	132348129	0	2.22679e-07	-0.201055	0.0370303	-16282	Distal non-mGene
cg08200419	chr10	132447977	132447976	rs61865614:134266326:C:T	132452822	132452822	0	1.26425e-09	-0.513315	0.0792554	-120668	Distal non-mGene
cg23687466	chr11	504938	504937	rs72851107:450987:G:C	450987	450987	0	1.28168e-13	-0.333256	0.0408604	-2719	Distal non-mGene
cg13555772	chr11	705749	705748	rs7945422:695854:C:T	695854	695854	0	1.78202e-08	-0.156113	0.0262199	-1416	Promoter mGene
cg00115288	chr11	705893	705892	rs7945422:695854:C:T	695854	695854	0	1.67564e-10	-0.221706	0.0323119	-1416	Promoter mGene
cg14135214	chr11	706000	705999	rs7945422:695854:C:T	695854	695854	0	8.00441e-12	-0.306277	0.0412674	-1416	Promoter mGene
cg09624752	chr11	695874	695873	rs7945422:695854:C:T	695854	695854	0	4.43268e-07	0.101049	0.0191339	-1416	Promoter non-mGene
cg10504333	chr11	773053	773052	rs7940065:770007:C:T	770007	770007	0	4.41416e-09	-0.145555	0.0233535	-22678	Distal non-mGene
cg18089519	chr11	763340	763339	rs12224894	772490	772490	0	2.0898e-11	0.76035	0.104918	-25161	Distal mGene
cg07279715	chr11	772788	772787	exm2267143	772701	772701	0	2.52464e-19	-0.208332	0.0200967	-25372	Distal non-mGene
cg13353733	chr11	773107	773106	exm2267143	772701	772701	0	4.57957e-23	-0.215317	0.0182932	-25372	Distal non-mGene
cg03314009	chr11	1867736	1867735	rs58282058:1919655:T:C	1898425	1898425	0	2.00405e-07	-0.394691	0.0723941	21137	Distal non-mGene
cg16800168	chr11	2197730	2197729	rs143583471:2217761:TTCTG:T	2196531	2196535	0	2.88345e-16	0.612473	0.0665831	226514	Distal non-mGene
cg10658853	chr11	2212283	2212282	rs72853963:2224664:G:A	2203434	2203434	0	2.64572e-09	-0.220661	0.0348421	219611	Distal non-mGene
cg16984897	chr11	3854486	3854485	rs11030008:3858616:G:A	3837386	3837386	0	1.65999e-07	0.172184	0.0313517	17141	Distal mGene
cg22319263	chr11	3854545	3854544	rs1869002	3849233	3849233	0	2.20515e-09	-0.126474	0.0198585	5294	Distal mGene
cg15489575	chr11	3854594	3854593	rs12421093:3873899:C:T	3852669	3852669	0	4.48763e-07	-0.0960189	0.0181906	1858	Promoter mGene
cg06349174	chr11	3856247	3856246	rs11030106	3860500	3860500	0	1.07609e-11	0.156508	0.0212412	-5973	Distal mGene
cg08325124	chr11	4544246	4544245	rs2566270:4565430:A:G	4544200	4544200	0	1.38053e-20	0.485907	0.0448175	-357060	Distal non-mGene
cg06925387	chr11	4607805	4607804	rs75704520:4658524:T:C	4637294	4637294	0	1.00921e-08	0.301897	0.049749	67633	Distal non-mGene
cg27190843	chr11	6419739	6419738	exm884967	6319186	6319186	0	2.74641e-09	23.3775	3.69554	-291445	Distal non-mGene
cg15511120	chr11	6576890	6576889	11:6396556:G:A	6375326	6375326	0	3.76039e-08	-0.29917	0.0515648	121934	Distal non-mGene
cg01833234	chr11	6571356	6571355	rs11040930	6597318	6597318	0	4.05979e-11	-0.28864	0.0405101	86083	Distal non-mGene
cg10208301	chr11	6571516	6571515	rs11040930	6597318	6597318	0	3.94938e-14	-0.330163	0.0394911	86083	Distal non-mGene
cg22916270	chr11	6613235	6613234	rs1800738:6638506:A:T	6617275	6617275	0	2.95379e-08	0.12266	0.020963	-135796	Distal non-mGene
cg18302375	chr11	6619843	6619842	rs1800752:6640869:A:G	6619638	6619638	0	4.86569e-11	-0.195673	0.0275918	-138159	Distal non-mGene
cg06978539	chr11	6623413	6623412	rs72911011:6644600:C:T	6623369	6623369	0	2.05959e-18	-0.269566	0.0268999	60032	Distal non-mGene
cg06469759	chr11	7991976	7991975	rs3903047:8014112:C:A	7992565	7992565	0	1.47704e-14	0.229057	0.0268532	26679	Distal non-mGene
cg12578013	chr11	8057280	8057279	rs61879615:8081940:A:C	8060393	8060393	0	3.86537e-07	-0.111201	0.0209383	-41149	Distal mGene
cg10639395	chr11	8688498	8688497	rs34009921:8618861:A:G	8597314	8597314	0	3.61742e-11	0.322077	0.0450685	-328598	Distal non-mGene
cg04747388	chr11	8658643	8658642	rs10840106	8680289	8680289	0	4.28748e-10	0.133978	0.0200447	230662	Distal non-mGene
cg12608775	chr11	8658971	8658970	rs10840106	8680289	8680289	0	6.15919e-09	0.147884	0.0239807	230662	Distal non-mGene
cg18753841	chr11	8658923	8658922	rs10840112:8710511:C:T	8688964	8688964	0	1.42514e-12	0.145112	0.0187688	221987	Distal non-mGene
cg26020521	chr11	8658890	8658889	11:8712289:C:CATA	8690742	8690742	0	6.97782e-09	0.136977	0.0223017	220209	Distal non-mGene
cg25873522	chr11	8715186	8715185	rs10840114:8736695:T:C	8715148	8715148	0	1.62449e-07	-0.176256	0.0320662	195803	Distal mGene
cg05416934	chr11	8766673	8766672	rs10734637:8788225:A:C	8766678	8766678	0	2.74132e-09	-0.11526	0.0182194	144273	Distal mGene
cg06365118	chr11	8774182	8774181	rs183796111:8828185:A:C	8806638	8806638	0	4.51688e-10	0.8326	0.124752	-124227	Distal non-mGene
cg20671944	chr11	8774269	8774268	rs183796111:8828185:A:C	8806638	8806638	0	7.89249e-08	0.8551	0.151388	-124227	Distal non-mGene
cg08710564	chr11	8807892	8807891	rs10743091:8833359:C:T	8811812	8811812	0	2.65355e-10	0.220329	0.0325215	99139	Distal mGene
cg16983486	chr11	8832698	8832697	rs76506961:8866146:A:AAAT	8844599	8844599	0	2.23882e-09	0.197234	0.0309834	66352	Distal mGene
cg00061907	chr11	8909939	8909938	rs3763914:8940703:G:T	8919156	8919156	0	2.67135e-25	-0.364078	0.0288835	541163	Distal non-mGene
cg21881798	chr11	8910162	8910161	rs4910156:8941197:T:G	8919650	8919650	0	2.39799e-23	0.554708	0.0467111	540669	Distal non-mGene
cg15696082	chr11	8909997	8909996	rs370695039:8976697:C:CAAAA	8955150	8955150	1	1.09987e-11	0.778021	0.10565	-44011	Distal mGene
cg27347174	chr11	9775585	9775584	rs113598795:9794586:G:GA	9773039	9773039	0	2.29126e-12	0.265741	0.0347517	535274	Distal non-mGene
cg22091621	chr11	10810226	10810225	rs16908333:10830677:C:G	10809130	10809130	0	7.71045e-29	0.459558	0.0329825	49666	Distal non-mGene
cg15887210	chr11	10858842	10858841	rs771372:10880371:T:A	10858824	10858824	0	2.38942e-15	0.147593	0.0166937	-49714	Distal non-mGene
cg12032795	chr11	10864895	10864894	rs771372:10880371:T:A	10858824	10858824	0	2.26085e-09	0.220736	0.0346857	-49714	Distal non-mGene
cg20291244	chr11	11798989	11798988	rs55716441:11807152:C:T	11785605	11785605	0	3.04289e-36	2.12885	0.12687	-1034618	Distal non-mGene
cg01298758	chr11	11841065	11841064	rs35774554:11861701:AG:A	11840154	11840155	0	1.52739e-11	-0.126191	0.0172761	-1031044	Distal non-mGene
cg12492653	chr11	11841321	11841320	rs11022066	11840666	11840666	0	3.64205e-24	-0.479493	0.0393638	-1031556	Distal non-mGene
cg27638288	chr11	12050400	12050399	rs10765918:12071855:A:G	12050308	12050308	0	2.65896e-19	0.330851	0.0319417	43700	Distal non-mGene
cg10414569	chr11	12051619	12051618	rs11022131	12050666	12050666	0	1.33295e-09	0.189131	0.0292478	43342	Distal non-mGene
cg04104358	chr11	12159427	12159426	rs4757247:12181000:A:G	12159453	12159453	0	8.85039e-08	0.207856	0.0369556	-65445	Distal mGene
cg09162749	chr11	12195416	12195415	rs10741569:12216979:A:G	12195432	12195432	0	3.14558e-13	-0.346676	0.0433412	-101424	Distal mGene
cg06855185	chr11	12233698	12233697	rs7930902:12255277:A:G	12233730	12233730	0	4.02996e-10	-0.224117	0.0334716	-202855	Distal non-mGene
cg27135113	chr11	12285904	12285903	rs11022274:12307084:G:C	12285537	12285537	0	3.46994e-07	-0.121882	0.0228491	-254662	Distal non-mGene
cg27170816	chr11	12330679	12330678	rs2088000:12361881:A:G	12340334	12340334	0	1.06656e-08	0.308667	0.0509576	334257	Distal non-mGene
cg21408139	chr11	12256238	12256237	rs35069152:12431931:G:A	12410384	12410384	0	8.76996e-09	-0.462871	0.0759245	264207	Distal non-mGene
cg04198854	chr11	12905813	12905812	rs150426308:12927333:GCCTGACTCTTA:G	12905786	12905797	0	1.21226e-16	-0.50753	0.0543161	-629706	Distal non-mGene
cg22525370	chr11	12903146	12903145	rs199779298:12931025:AACACAGGG:A	12909478	12909486	0	7.94281e-09	0.333449	0.0545187	-633398	Distal non-mGene
cg16152924	chr11	12964168	12964167	rs12795393:12989177:G:A	12967630	12967630	0	4.77004e-08	0.101243	0.0175987	184570	Distal non-mGene
cg15900701	chr11	13216654	13216653	rs7108752:13239559:A:G	13218012	13218012	0	2.9524e-14	-0.214943	0.0255559	58640	Distal non-mGene
cg04057599	chr11	13216058	13216057	rs2403663:13242789:A:G	13221242	13221242	0	3.29413e-13	0.248497	0.0310984	55410	Distal non-mGene
cg02394317	chr11	13962443	13962442	rs1528656:13992171:C:T	13970624	13970624	0	2.07001e-08	-0.102116	0.0172386	-7935	Distal mGene
cg21415227	chr11	13964365	13964364	rs10766139:14154069:A:T	14132523	14132523	0	8.49112e-10	0.142348	0.0217213	-169834	Distal mGene
cg04547675	chr11	13964616	13964615	rs10766139:14154069:A:T	14132523	14132523	0	1.90127e-18	0.245755	0.0244915	-169834	Distal mGene
cg08655465	chr11	13873370	13873369	rs144605782:14161255:A:AATATATAT	14139709	14139709	0	1.04348e-11	0.740382	0.100409	-177020	Distal non-mGene
cg19488260	chr11	13963450	13963449	rs36081017:14170020:T:TA	14148474	14148474	0	5.78001e-21	0.389678	0.0354773	-185785	Distal mGene
cg19485859	chr11	14148529	14148528	rs36081017:14170020:T:TA	14148474	14148474	0	1.99029e-12	-0.187304	0.024414	-185785	Distal mGene
cg02251663	chr11	14259508	14259507	rs55793703:14320324:T:TA	14298778	14298778	0	1.24971e-12	0.15965	0.0205869	201249	Distal non-mGene
cg23387056	chr11	14259197	14259196	rs55793703:14320324:T:TA	14298778	14298778	0	1.37544e-08	0.15559	0.0259046	201249	Distal non-mGene
cg18937875	chr11	14908644	14908643	rs10766197	14900334	14900334	0	3.50738e-13	-0.281262	0.0352475	-256611	Distal non-mGene
cg02158090	chr11	14904841	14904840	rs10766198:14923335:A:T	14901789	14901789	0	1.35266e-08	0.0913758	0.0152049	-258066	Distal non-mGene
cg03486485	chr11	14905459	14905458	rs10766198:14923335:A:T	14901789	14901789	0	3.13985e-14	0.1487	0.0177022	-258066	Distal non-mGene
cg14768245	chr11	14905235	14905234	rs10832314:14926414:A:G	14904868	14904868	0	7.31532e-10	0.218928	0.0332617	-261145	Distal non-mGene
cg25251204	chr11	14905911	14905910	rs10832314:14926414:A:G	14904868	14904868	0	5.54934e-23	0.402751	0.0343084	-261145	Distal non-mGene
cg13647856	chr11	14971233	14971232	rs75567272:15126262:C:T	15104716	15104716	0	4.455e-08	0.212862	0.0369106	7708	Distal non-mGene
cg15378786	chr11	17014591	17014590	rs7930890:17024699:G:A	17003152	17003152	0	2.42816e-23	0.290963	0.0245057	11291	Distal mGene
cg21965048	chr11	17238599	17238598	rs12420958:17100432:G:T	17078885	17078885	0	1.87987e-09	-0.162762	0.0254324	-64442	Distal non-mGene
cg01379234	chr11	17390229	17390228	rs2883548:17377754:A:G	17356207	17356207	0	5.34381e-08	-0.0860772	0.0150237	188209	Distal non-mGene
cg09102037	chr11	17526848	17526847	rs5789990:17548401:CG:C	17526854	17526855	0	2.22721e-24	-0.668005	0.0544828	-146205	Distal non-mGene
cg14610861	chr11	17528299	17528298	rs2355021:17549409:T:C	17527862	17527862	0	1.0214e-11	0.186116	0.0252273	-147213	Distal non-mGene
cg24317571	chr11	17888872	17888871	rs548589:17923860:T:G	17902313	17902313	0	2.38163e-10	0.185739	0.0273335	110849	Distal mGene
cg08418111	chr11	18412199	18412198	11:18415236:CA:C	18393689	18393690	0	1.94598e-21	-0.499034	0.0447117	-71491	Distal non-mGene
cg21471707	chr11	18412202	18412201	11:18415236:CA:C	18393689	18393690	0	4.07738e-24	-0.660404	0.0542973	-71491	Distal non-mGene
cg07398106	chr11	18412625	18412624	11:18415236:CA:C	18393689	18393690	0	3.47801e-38	-1.09561	0.0624303	-71491	Distal non-mGene
cg07415359	chr11	18412808	18412807	11:18415236:CA:C	18393689	18393690	0	1.97813e-27	-0.59406	0.0443227	-71491	Distal non-mGene
cg02184246	chr11	18634621	18634620	rs12289703:18656174:G:A	18634627	18634627	0	4.6691e-11	0.203883	0.0287187	-312429	Distal non-mGene
cg20219074	chr11	18634532	18634531	rs2084220:18656932:C:T	18635385	18635385	0	1.01788e-09	0.137319	0.021066	57737	Distal non-mGene
cg09201001	chr11	18634535	18634534	rs2084220:18656932:C:T	18635385	18635385	0	1.08585e-14	0.193592	0.0225558	57737	Distal non-mGene
cg17700882	chr11	18736886	18736885	rs1550870	18729494	18729494	0	8.595e-13	-0.237375	0.0303494	-140747	Distal non-mGene
cg25161531	chr11	19061507	19061506	rs147877082:19081575:TAC:T	19060028	19060030	0	3.50602e-15	-0.25873	0.0294815	290696	Distal non-mGene
cg07189401	chr11	19714788	19714787	rs1487204	19574155	19574155	0	4.17063e-08	0.10977	0.0189896	-223431	Distal non-mGene
cg22701534	chr11	19913613	19913612	rs7928556:19932077:G:T	19910531	19910531	0	3.07416e-17	-0.226734	0.0236845	-559807	Distal mGene
cg13511777	chr11	20112615	20112614	rs10766626:20134168:T:C	20112622	20112622	0	2.31165e-23	-0.636074	0.053536	-761898	Distal mGene
cg07311362	chr11	20114323	20114322	rs1992494:20135817:A:C	20114271	20114271	0	1.32971e-18	-0.426428	0.0422488	-763547	Distal mGene
cg07103917	chr11	20364083	20364082	rs4757944:20383330:A:G	20361784	20361784	0	6.54397e-08	0.151592	0.026654	-230054	Distal non-mGene
cg24426391	chr11	20363341	20363340	rs12360593:20384003:A:G	20362457	20362457	0	7.05206e-44	-1.30605	0.0656995	-230727	Distal non-mGene
cg02900213	chr11	20364211	20364210	rs10437608:20385606:G:A	20364060	20364060	0	3.00549e-11	-0.174067	0.0242417	-232330	Distal non-mGene
cg17298751	chr11	22341825	22341824	rs144269071:22357900:C:CT	22336354	22336354	0	1.31212e-07	0.155735	0.0281021	-1948824	Distal non-mGene
cg19182008	chr11	26276695	26276694	rs72874951:26301227:G:A	26279680	26279680	0	5.4469e-12	0.394309	0.0526354	940433	Distal non-mGene
cg26341558	chr11	26277004	26277003	rs72874968:26303257:A:G	26281710	26281710	0	2.33796e-17	0.269825	0.0280522	27889	Distal non-mGene
cg06731443	chr11	27473164	27473163	rs4617543	27460805	27460805	0	4.48312e-09	-0.271341	0.0435567	-240692	Distal non-mGene
cg24451363	chr11	27473219	27473218	rs4617543	27460805	27460805	0	3.15442e-07	-0.194284	0.0362824	-240692	Distal non-mGene
cg14346046	chr11	27473246	27473245	rs67626918:27530810:CT:C	27509263	27509264	0	3.47182e-07	-0.193232	0.0362258	-289150	Distal non-mGene
cg01154326	chr11	28176432	28176431	rs144089176:27730872:T:A	27709325	27709325	0	2.45003e-07	0.752009	0.139028	398923	Distal mGene
cg25418670	chr11	30322827	30322826	rs1222219:30344345:G:C	30322798	30322798	0	6.44797e-08	-0.269641	0.0473845	1047012	Distal non-mGene
cg19738233	chr11	31372239	31372238	rs138443124:31387538:ATAT:A	31365991	31365994	0	1.77898e-12	-0.480266	0.0624367	143654	Distal non-mGene
cg08349108	chr11	33036703	33036702	exm-rs1064005	33043848	33043848	0	7.18372e-16	-0.309136	0.0341783	-150670	Distal non-mGene
cg12389669	chr11	33166211	33166210	rs7118056:33202460:G:A	33180914	33180914	0	1.44099e-15	0.249391	0.0279365	75758	Distal non-mGene
cg15112369	chr11	34174368	34174367	rs6484698:34202276:G:C	34180729	34180729	0	2.05825e-08	-0.164037	0.0276864	177279	Distal mGene
cg07815068	chr11	34359149	34359148	rs2611134:34380706:A:G	34359159	34359159	0	4.98544e-07	0.0826485	0.0157259	-1151	Promoter non-mGene
cg01934076	chr11	34492748	34492747	rs737254	34493394	34493394	0	1.25872e-24	0.500975	0.0405535	-601105	Distal non-mGene
cg02333667	chr11	34913134	34913133	rs57257751:34927722:T:G	34906175	34906175	0	1.20005e-09	0.188905	0.0291215	513888	Distal non-mGene
cg25948180	chr11	34915235	34915234	rs57257751:34927722:T:G	34906175	34906175	0	4.62976e-12	0.223314	0.0296936	513888	Distal non-mGene
cg03305906	chr11	34915572	34915571	rs57257751:34927722:T:G	34906175	34906175	0	9.35145e-14	0.438211	0.0533695	513888	Distal non-mGene
cg09194750	chr11	34915795	34915794	rs56697214:34949918:C:CT	34928371	34928371	0	3.68703e-09	0.110514	0.0176312	491692	Distal non-mGene
cg22717608	chr11	34916119	34916118	rs12275275:34957816:A:G	34936269	34936269	0	5.23863e-11	0.333932	0.0471785	483794	Distal non-mGene
cg19536085	chr11	34941418	34941417	rs2915196:34958353:C:T	34936806	34936806	0	4.74908e-15	-0.573761	0.0657661	483257	Distal non-mGene
cg22934516	chr11	35392405	35392404	rs60103066:35426965:AT:A	35405418	35405419	0	1.79317e-07	0.170899	0.0312109	-489589	Distal non-mGene
cg00458322	chr11	35404404	35404403	rs10742347:35430424:A:G	35408877	35408877	0	5.72936e-19	-0.442855	0.0432821	-493048	Distal non-mGene
cg24190415	chr11	35419466	35419465	rs1923294:35439816:A:G	35418269	35418269	0	6.86298e-10	0.17276	0.0261987	-502440	Distal non-mGene
cg13045881	chr11	35390191	35390190	rs7949277:35495129:C:G	35473581	35473581	0	3.78887e-07	0.225964	0.0425127	470400	Distal non-mGene
cg26553513	chr11	40289189	40289188	rs1377104:40306481:G:A	40284931	40284931	0	1.18862e-11	0.20891	0.028423	1174842	Distal mGene
cg03818576	chr11	40291111	40291110	rs998447	40289239	40289239	0	1.22557e-16	-0.245038	0.0262292	1170534	Distal mGene
cg15033819	chr11	40329376	40329375	rs1452464:40350968:C:T	40329418	40329418	0	6.39598e-10	0.18582	0.0281218	1130355	Distal mGene
cg16667275	chr11	43311946	43311945	rs7941216	43517463	43517463	0	2.89646e-07	0.134928	0.0251116	163095	Distal non-mGene
cg03856109	chr11	44066163	44066162	rs11037859:44111086:G:T	44089536	44089536	0	4.05078e-08	-0.115901	0.0200294	451157	Distal non-mGene
cg25805374	chr11	44290481	44290480	rs10838251	44290418	44290418	0	1.43474e-11	0.18119	0.0247671	250275	Distal non-mGene
cg15047297	chr11	44877625	44877624	rs835768:44909493:A:G	44887942	44887942	0	3.51914e-08	-0.173981	0.0299171	-161477	Distal mGene
cg11145222	chr11	44882535	44882534	rs75823207:44909761:C:T	44888210	44888210	0	4.52045e-08	-0.239612	0.0415707	-161745	Distal mGene
cg25571479	chr11	45293735	45293734	rs7118408	45297616	45297616	0	1.79181e-13	-0.212272	0.0262148	-571151	Distal non-mGene
cg23097878	chr11	45858180	45858179	rs10838524:45870177:A:G	45848626	45848626	0	1.24256e-07	0.101935	0.0183559	70186	Distal non-mGene
cg04238311	chr11	45924080	45924079	rs939108:45936817:G:C	45915266	45915266	0	3.03826e-09	0.233002	0.0369487	-68148	Distal non-mGene
cg05861348	chr11	45923240	45923239	rs56148819:45944290:T:C	45922739	45922739	0	5.41299e-16	-0.407185	0.0447822	198439	Distal non-mGene
cg24204282	chr11	45923370	45923369	rs56148819:45944290:T:C	45922739	45922739	0	6.70494e-14	-0.4006	0.0484477	198439	Distal non-mGene
cg22629883	chr11	46236958	46236957	rs12292649:46257757:C:T	46236206	46236206	0	5.66749e-16	-0.510822	0.0562281	41455	Distal non-mGene
cg01722644	chr11	46237276	46237275	rs12292649:46257757:C:T	46236206	46236206	0	3.91111e-15	-0.575202	0.0656821	41455	Distal non-mGene
cg17144547	chr11	46238684	46238683	rs12292649:46257757:C:T	46236206	46236206	0	3.00551e-08	0.263987	0.0451435	41455	Distal non-mGene
cg23701971	chr11	46315401	46315400	rs72897640:46896126:G:T	46874575	46874575	0	2.95128e-16	0.332744	0.0361887	62114	Distal non-mGene
cg03339077	chr11	47143507	47143506	rs10769244:47182368:A:G	47160817	47160817	0	4.88347e-07	0.117397	0.0223185	-242175	Distal non-mGene
cg15024177	chr11	47767505	47767504	rs10458914:47836026:G:A	47814474	47814474	0	5.22937e-17	0.258439	0.0272484	34081	Distal non-mGene
cg11948159	chr11	57336278	57336277	rs10896608:57108911:C:T	57341437	57341437	0	6.06408e-14	-0.286328	0.034555	186928	Distal non-mGene
cg21347045	chr11	57336294	57336293	rs10896608:57108911:C:T	57341437	57341437	0	7.13859e-07	-0.211445	0.0408436	186928	Distal non-mGene
cg27640302	chr11	57528661	57528660	rs2584862:57241956:T:A	57474483	57474483	0	1.03094e-06	-0.0947402	0.0185923	41303	Distal non-mGene
cg25284762	chr11	57500207	57500206	rs2848626:57283988:C:T	57516515	57516515	0	1.01111e-07	0.112917	0.020176	-55966	Distal non-mGene
cg02958346	chr11	57658260	57658259	rs11229087:57425699:C:T	57658227	57658227	0	1.66495e-20	0.301676	0.0279037	95016	Distal non-mGene
cg16787005	chr11	57658249	57658248	rs479573:57431034:C:T	57663562	57663562	0	8.61748e-17	0.236039	0.0251075	89681	Distal non-mGene
cg16340030	chr11	59787401	59787400	rs2957224:59513648:A:T	59746175	59746175	0	1.0063e-10	0.268072	0.0385336	8884	Distal mGene
cg08716584	chr11	60389689	60389688	rs2233253	60389693	60389693	0	5.58304e-08	-0.192139	0.0335888	226043	Distal non-mGene
cg18856296	chr11	60841770	60841769	rs956708:60599421:G:C	60831948	60831948	0	7.93864e-13	0.15489	0.0197678	74640	Distal non-mGene
cg11231631	chr11	60786283	60786282	rs1944778:60602839:C:T	60835366	60835366	0	2.71499e-08	-0.0952734	0.0162348	71222	Distal non-mGene
cg23904249	chr11	60841479	60841478	rs514890:60604226:A:G	60836753	60836753	0	3.11998e-11	0.231414	0.032259	69835	Distal non-mGene
cg05699373	chr11	60841836	60841835	rs514890:60604226:A:G	60836753	60836753	0	1.22746e-25	0.256921	0.0201802	69835	Distal non-mGene
cg11421956	chr11	60921944	60921943	rs143737511:60674537:T:TTGGCTTCCC	60907065	60907065	0	4.72826e-30	0.372244	0.0258649	-64100	Distal non-mGene
cg07268726	chr11	60934447	60934446	rs2023854:60697138:T:G	60929666	60929666	0	5.65771e-17	-0.310335	0.0327654	231951	Distal non-mGene
cg14132103	chr11	60912694	60912693	rs4938992:60707896:C:G	60940424	60940424	0	2.67237e-09	-0.11811	0.0186552	161971	Distal non-mGene
cg27126924	chr11	60905927	60905926	rs542773:60710983:T:C	60943511	60943511	0	3.62606e-19	0.171706	0.0166591	158884	Distal non-mGene
cg07849136	chr11	61125996	61125995	11:60889762:TGGTG:T	61122290	61122294	0	2.54598e-08	-0.569168	0.0967711	-279325	Distal non-mGene
cg07849136	chr11	61125996	61125995	rs74555568:60907886:C:T	61140414	61140414	1	1.74996e-07	-0.95089	0.173494	-297449	Distal non-mGene
cg07179634	chr11	61139111	61139110	rs10792305:60910618:T:C	61143146	61143146	0	5.3019e-10	0.0992047	0.0149326	-300181	Distal non-mGene
cg02920403	chr11	61141538	61141537	rs614875:60911892:A:G	61144420	61144420	0	9.34254e-22	-0.803623	0.0712399	-301455	Distal non-mGene
cg09664380	chr11	61146517	61146516	rs614875:60911892:A:G	61144420	61144420	0	3.16294e-15	-0.205213	0.0233368	-301455	Distal non-mGene
cg26241240	chr11	61126190	61126189	rs519296	61152282	61152282	0	2.74774e-18	-0.261575	0.0262269	-309317	Distal non-mGene
cg23043946	chr11	61139506	61139505	rs519296	61152282	61152282	0	2.02323e-22	-0.502622	0.0435959	-309317	Distal non-mGene
cg19481605	chr11	61829341	61829340	rs2072113:61604967:C:T	61837495	61837495	0	5.65974e-07	0.244795	0.0468249	-44515	Distal mGene
cg24278870	chr11	61817743	61817742	rs174579:61605613:C:T	61838141	61838141	0	8.24076e-07	-0.129824	0.0252317	-45161	Distal non-mGene
cg21409469	chr11	61827298	61827297	rs2727265:61609004:C:A	61841532	61841532	0	1.1421e-06	0.486367	0.0958762	282441	Distal non-mGene
cg03410903	chr11	61680176	61680175	rs12273597:61711621:C:T	61944149	61944149	0	3.14813e-09	0.244899	0.0388781	-23880	Distal non-mGene
cg06573573	chr11	61951501	61951500	rs972355:61717337:G:C	61949865	61949865	0	1.2318e-06	0.192978	0.0381682	-156885	Distal non-mGene
cg12961922	chr11	61899422	61899421	rs200389888:61720105:ATT:A	61952633	61952635	0	1.14021e-06	0.120634	0.0237785	-32364	Distal mGene
cg23584647	chr11	61949720	61949719	rs2736595:61720538:G:A	61953066	61953066	0	4.12465e-15	0.199563	0.0228117	-3245	Distal mGene
cg09726693	chr11	61949924	61949923	rs2736595:61720538:G:A	61953066	61953066	0	1.21596e-06	0.0830114	0.0164091	-3245	Distal mGene
cg15456821	chr11	61949754	61949753	rs2727272:61721198:C:A	61953726	61953726	0	3.90232e-18	0.398532	0.0401926	-3905	Distal mGene
cg11562596	chr11	61950295	61950294	rs2524294:61721234:G:A	61953762	61953762	0	5.38337e-32	0.969653	0.0640788	-3941	Distal mGene
cg06068935	chr11	61949534	61949533	rs2668899:61721639:A:G	61954167	61954167	0	3.96471e-26	0.648033	0.0501768	-4346	Distal mGene
cg05481452	chr11	61950213	61950212	rs2668899:61721639:A:G	61954167	61954167	0	2.84969e-29	0.77321	0.0548508	-4346	Distal mGene
cg20584555	chr11	61950309	61950308	rs2668899:61721639:A:G	61954167	61954167	0	1.62803e-32	0.824846	0.0538014	-4346	Distal mGene
cg13882100	chr11	62122450	62122449	rs1849352:61822329:G:C	62054857	62054857	0	4.86173e-07	-0.182341	0.0346585	-105036	Distal non-mGene
cg16007742	chr11	62299198	62299197	rs72926147:61860459:G:A	62092987	62092987	0	3.32779e-07	0.583451	0.109194	-200936	Distal non-mGene
cg21938786	chr11	62109102	62109101	rs200990429:61878076:A:AT	62110604	62110604	0	3.86107e-07	-0.165442	0.0311501	-218553	Distal non-mGene
cg02397499	chr11	62123883	62123882	rs414975:61880227:T:C	62112755	62112755	0	8.20899e-10	0.161322	0.0245922	-220704	Distal non-mGene
cg05871569	chr11	62124460	62124459	rs141157640:61891897:C:CTTGTT	62124425	62124425	0	8.10587e-20	0.843165	0.0799009	-331445	Distal non-mGene
cg23368852	chr11	62108366	62108365	rs12417437:61894801:C:T	62127329	62127329	0	1.15622e-11	0.310753	0.0422503	-374687	Distal non-mGene
cg26003873	chr11	62393499	62393498	rs2513039:62080692:C:T	62313220	62313220	0	1.08066e-06	0.135432	0.0266326	-143927	Distal non-mGene
cg16452108	chr11	62394779	62394778	rs7936165:62170182:C:T	62402710	62402710	0	1.52725e-10	0.31345	0.0455673	153525	Distal non-mGene
cg27641076	chr11	62444317	62444316	rs10897276:62209534:G:A	62442062	62442062	0	9.52904e-20	-0.233101	0.0221449	114173	Distal mGene
cg25272143	chr11	62444519	62444518	rs10897276:62209534:G:A	62442062	62442062	0	6.37701e-24	-0.620789	0.0513466	114173	Distal mGene
cg06861841	chr11	62444643	62444642	rs10897276:62209534:G:A	62442062	62442062	0	7.70966e-22	-0.573957	0.0507399	114173	Distal mGene
cg12857638	chr11	62444698	62444697	rs10897276:62209534:G:A	62442062	62442062	0	4.28816e-28	-0.585203	0.0428637	114173	Distal mGene
cg00685014	chr11	62444724	62444723	rs10897276:62209534:G:A	62442062	62442062	0	4.70414e-24	-0.539585	0.0444486	114173	Distal mGene
cg16509239	chr11	62444960	62444959	rs10897276:62209534:G:A	62442062	62442062	0	2.46678e-23	-0.372238	0.0313577	114173	Distal mGene
cg12340169	chr11	62666341	62666340	rs11231137:62315699:G:A	62548227	62548227	0	2.16487e-07	-0.176505	0.0324725	-210779	Distal non-mGene
cg12316258	chr11	62612945	62612944	rs113222038:62380027:C:T	62612555	62612555	0	1.80968e-11	0.286838	0.0394365	-10715	Distal non-mGene
cg10449041	chr11	62612642	62612641	rs35210758:62386647:GA:G	62619175	62619176	0	8.36639e-17	0.315864	0.0335809	-17335	Distal non-mGene
cg09011167	chr11	62655797	62655796	rs597259:62430659:T:A	62663187	62663187	0	2.57854e-21	0.490015	0.0440846	-41012	Distal non-mGene
cg27305510	chr11	62667245	62667244	exm919160	62666701	62666701	0	8.14447e-13	-0.239263	0.0305536	-64861	Distal non-mGene
cg02375832	chr11	62670144	62670143	exm919160	62666701	62666701	0	4.75091e-09	-0.191567	0.0308075	-64861	Distal non-mGene
cg26363414	chr11	62671186	62671185	exm919160	62666701	62666701	0	1.61812e-17	-0.296318	0.0306118	-64861	Distal non-mGene
cg02600515	chr11	62754225	62754224	rs113326335:62514039:G:A	62746567	62746567	0	8.18559e-15	0.264611	0.0306574	-18498	Distal non-mGene
cg14329350	chr11	62806409	62806408	rs10431144:62598296:A:G	62830824	62830824	0	8.49062e-11	-0.304594	0.0435852	-24522	Distal mGene
cg13096923	chr11	63017587	63017586	rs11231306:62785193:G:C	63017721	63017721	0	3.00767e-10	0.152165	0.0225389	-95914	Distal non-mGene
cg10713715	chr11	63766185	63766184	11:63396306:CAAAAAAAAAAAAA:C	63628834	63628847	0	5.93908e-09	0.114906	0.0186113	-137640	Distal non-mGene
cg27373749	chr11	64008141	64008140	rs12418000:63700056:C:T	63932584	63932584	0	5.25935e-28	-0.381306	0.0279975	-97641	Distal non-mGene
cg04935121	chr11	64007942	64007941	rs10897465:63722448:C:T	63954976	63954976	0	6.54264e-11	-0.498681	0.0708667	-120033	Distal non-mGene
cg18137308	chr11	64007965	64007964	rs10897465:63722448:C:T	63954976	63954976	0	1.1157e-07	-0.353258	0.0633542	-120033	Distal non-mGene
cg02384565	chr11	64810702	64810701	rs59573507:63724444:CA:C	63956972	63956973	0	8.17733e-07	0.215445	0.0418584	-143584	Distal non-mGene
cg17998964	chr11	63888432	63888431	rs578001:63792977:A:G	64025505	64025505	0	3.68995e-07	0.0951572	0.0178836	140601	Distal non-mGene
cg22796860	chr11	64060875	64060874	rs11231682:63817673:C:G	64050201	64050201	1	1.62666e-06	1.20794	0.241898	115905	Distal mGene
cg22796860	chr11	64060875	64060874	rs477400:63817799:G:C	64050327	64050327	0	1.0364e-10	0.959074	0.13797	115779	Distal mGene
cg14956360	chr11	64219326	64219325	rs11603192:63927695:A:G	64160223	64160223	0	5.55424e-07	0.105555	0.020175	-346835	Distal non-mGene
cg03074692	chr11	64448909	64448908	rs894462:64216418:G:C	64448946	64448946	0	4.22102e-15	0.720314	0.0823746	274242	Distal non-mGene
cg02961807	chr11	64644033	64644032	rs59809524:64233912:CTT:C	64466440	64466442	0	2.95612e-07	-0.224687	0.0418509	256748	Distal mGene
cg22690720	chr11	65040612	65040611	rs2458298:64814813:T:G	65047341	65047341	0	2.22177e-08	0.209386	0.0354333	36823	Distal non-mGene
cg03908771	chr11	65345678	65345677	rs3782094	65124998	65124998	0	7.91408e-08	0.11791	0.020877	-35674	Distal non-mGene
cg22229551	chr11	65266151	65266150	rs1212391:65017277:T:A	65249806	65249806	0	2.08695e-12	0.339222	0.0442644	-35966	Distal non-mGene
cg09225861	chr11	65302210	65302209	rs1212391:65017277:T:A	65249806	65249806	0	1.30526e-11	-0.250142	0.0341118	-35966	Distal non-mGene
cg18930076	chr11	64449102	64449101	rs116964987:65029979:G:T	65262508	65262508	0	2.73911e-09	0.386041	0.0610206	-48668	Distal non-mGene
cg23930334	chr11	65225865	65225864	rs150662982:65068042:TTTTG:T	65300571	65300575	0	6.58821e-08	-0.334355	0.0588031	-38809	Distal non-mGene
cg16317318	chr11	65322130	65322129	rs4149843:65089459:G:A	65321988	65321988	0	7.87556e-10	0.535924	0.0815983	-60226	Distal non-mGene
cg25014744	chr11	65261954	65261953	rs525141:65089792:G:C	65322321	65322321	0	3.17066e-08	-0.116324	0.0199295	-60559	Distal mGene
cg16555856	chr11	65355787	65355786	rs77130160:65122694:C:T	65355223	65355223	0	1.09691e-19	-0.654089	0.0622758	159700	Distal non-mGene
cg08296831	chr11	65786705	65786704	rs143489438:65149861:G:A	65382390	65382390	0	8.49718e-07	-0.992685	0.193185	115372	Distal non-mGene
cg16247408	chr11	65488919	65488918	rs115495487:65255304:C:T	65487833	65487833	0	3.88865e-14	-0.506591	0.0605744	-65059	Distal non-mGene
cg10518572	chr11	65793165	65793164	rs11375683:65492280:C:CA	65724809	65724809	0	7.73674e-08	-0.275869	0.0488042	137217	Distal non-mGene
cg04293602	chr11	65786190	65786189	rs75162774:65492483:G:A	65725012	65725012	0	2.87413e-10	-0.180259	0.0266664	55790	Distal non-mGene
cg22040449	chr11	65788278	65788277	rs10896043:65543827:T:C	65776356	65776356	0	5.15887e-08	0.124585	0.0217172	-49417	Distal non-mGene
cg19299482	chr11	65797231	65797230	rs12146493:65547333:G:A	65779862	65779862	0	9.69578e-07	0.140684	0.0275349	-52923	Distal non-mGene
cg04055107	chr11	65859264	65859263	rs1939212:65626701:C:T	65859230	65859230	0	3.12568e-29	0.410239	0.0291333	-147234	Distal non-mGene
cg19026260	chr11	66277881	66277880	rs489337:65854561:A:G	66087090	66087090	0	5.82199e-07	0.22832	0.0437252	-16727	Distal non-mGene
cg24089521	chr11	66049512	66049511	rs34238902:65906434:G:GGTA	66138963	66138963	0	6.96714e-12	0.140161	0.0188215	-68600	Distal non-mGene
cg25635864	chr11	66335916	66335915	rs35962792:66138329:CA:C	66370858	66370859	0	7.17771e-07	-0.117421	0.0226868	-22908	Distal non-mGene
cg08931107	chr11	66336134	66336133	rs35962792:66138329:CA:C	66370858	66370859	0	6.51388e-07	-0.1752	0.0337113	-22908	Distal non-mGene
cg16909570	chr11	66372399	66372398	rs72557994:66139640:G:C	66372169	66372169	0	7.56969e-08	-0.440069	0.0777904	-24219	Distal non-mGene
cg24826102	chr11	66393339	66393338	rs71045941:66168813:C:CT	66401342	66401342	0	1.30567e-11	0.227607	0.031039	276579	Distal non-mGene
cg17237223	chr11	66570928	66570927	rs7939759:66337964:C:T	66570493	66570493	0	3.19666e-11	-0.318463	0.0444214	107428	Distal non-mGene
cg10956900	chr11	66567904	66567903	rs4930384:66340116:G:A	66572645	66572645	0	4.0202e-12	-0.180842	0.0239652	105276	Distal non-mGene
cg11509184	chr11	66557060	66557059	rs59431265:66361703:G:A	66594232	66594232	0	4.71116e-15	-0.240506	0.0275632	83689	Distal non-mGene
cg14557522	chr11	66618858	66618857	rs12804382:66458696:C:T	66691225	66691225	0	3.90991e-08	0.0988286	0.0170576	-282067	Distal non-mGene
cg01196861	chr11	67367657	67367656	11:67092907:T:TAAAAAAAAAAAAA	67325436	67325436	0	2.18326e-24	1.85767	0.151472	-268618	Distal non-mGene
cg21404910	chr11	67421021	67421020	rs79479850:67138101:A:T	67370630	67370630	0	4.53258e-08	0.288173	0.0500005	-363852	Distal non-mGene
cg11566244	chr11	67584316	67584315	rs12794995:67372946:G:A	67605475	67605475	0	2.69116e-13	0.219484	0.0273461	-21880	Distal mGene
cg20362170	chr11	67604973	67604972	rs12794995:67372946:G:A	67605475	67605475	0	5.08771e-25	0.505868	0.040468	-21880	Distal non-mGene
cg03603279	chr11	67605987	67605986	rs12794995:67372946:G:A	67605475	67605475	0	2.93998e-15	0.205019	0.0232818	-21880	Distal non-mGene
cg22501824	chr11	68469477	68469476	rs624970:68231455:A:T	68463987	68463987	0	4.14401e-08	-0.263368	0.0455506	584910	Distal non-mGene
cg22911054	chr11	68835912	68835911	rs11228377:68603346:T:C	68835878	68835878	0	1.04818e-07	0.177078	0.031683	8532	Distal mGene
cg02939879	chr11	68994776	68994775	rs150561761:68604318:G:GGGAA	68836850	68836850	0	7.74413e-08	0.193802	0.0342869	7560	Distal non-mGene
cg10879867	chr11	68854796	68854795	rs71465408:68617022:A:G	68849554	68849554	0	1.1911e-18	0.281669	0.0278566	-97990	Distal non-mGene
cg07716408	chr11	68856054	68856053	rs3794027:68697336:T:C	68929868	68929868	0	2.11491e-13	-0.316533	0.0392312	745548	Distal non-mGene
cg21862992	chr11	68890916	68890915	rs3794027:68697336:T:C	68929868	68929868	0	1.9778e-17	0.296573	0.0307441	745548	Distal non-mGene
cg23252919	chr11	68934426	68934425	rs17533324:68697344:C:T	68929876	68929876	0	6.09803e-10	-0.202517	0.0306065	745540	Distal non-mGene
cg23845249	chr11	69094182	69094181	rs1123665:68855197:T:G	69087729	69087729	0	1.8429e-12	0.136314	0.0177359	-626998	Distal non-mGene
cg22046661	chr11	69123219	69123218	rs1060435:68855595:A:G	69088127	69088127	0	2.83174e-09	-0.128462	0.0203267	-627396	Distal non-mGene
cg02584610	chr11	69089416	69089415	rs4930651:68859030:G:T	69091562	69091562	0	7.09435e-19	-0.364787	0.035775	-630831	Distal non-mGene
cg21670003	chr11	69100498	69100497	rs12280942:68859683:A:G	69092215	69092215	0	2.14441e-14	-0.166986	0.0197247	-631484	Distal non-mGene
cg16709353	chr11	69089350	69089349	rs4930653:68865478:G:A	69098010	69098010	0	1.34545e-20	-0.290692	0.0268015	543077	Distal non-mGene
cg12152352	chr11	69089439	69089438	rs4930653:68865478:G:A	69098010	69098010	0	1.79541e-20	-0.349481	0.0323623	543077	Distal non-mGene
cg13874366	chr11	69089484	69089483	rs11228499:68870396:C:A	69102928	69102928	0	1.85513e-13	0.131007	0.016191	538159	Distal non-mGene
cg23121140	chr11	69049471	69049470	rs921670:68871639:C:T	69104171	69104171	0	4.74193e-10	0.15372	0.0230645	536916	Distal non-mGene
cg05600906	chr11	69102643	69102642	rs1869446:68872284:A:G	69104816	69104816	0	8.63288e-07	0.130629	0.0254389	536271	Distal non-mGene
cg16499607	chr11	69115889	69115888	rs2924553:68889390:T:A	69121922	69121922	0	2.17406e-07	0.111382	0.0204949	519165	Distal non-mGene
cg17042914	chr11	69131199	69131198	rs57833364:68898784:G:C	69131316	69131316	0	2.08363e-07	-0.230481	0.0423393	509771	Distal non-mGene
cg03631743	chr11	68752227	68752226	rs3212907:69468776:C:T	69654008	69654008	0	1.34662e-07	0.656812	0.118637	-605111	Distal non-mGene
cg13608094	chr11	69646469	69646468	rs11603541:69472373:C:G	69657605	69657605	0	3.04778e-07	-0.196296	0.0366074	-753763	Distal non-mGene
cg26123414	chr11	69675549	69675548	rs1789166	69667323	69667323	0	5.83639e-11	0.0961535	0.0136232	-618426	Distal non-mGene
cg27422467	chr11	69667337	69667336	rs1789164:69489163:C:G	69674395	69674395	0	1.48769e-07	-0.17526	0.0317774	-625498	Distal non-mGene
cg06539449	chr11	69646241	69646240	rs117949036:69489199:A:T	69674431	69674431	0	1.18485e-11	-0.2767	0.0376432	-625534	Distal non-mGene
cg16709342	chr11	70415268	70415267	rs139579645:70290972:ATATT:A	70444866	70444870	0	6.62189e-07	-0.163559	0.0314933	807711	Distal non-mGene
cg21202716	chr11	70661918	70661917	rs525304:70506206:G:T	70660101	70660101	0	3.16732e-08	0.188948	0.0323707	592476	Distal mGene
cg14537332	chr11	70662009	70662008	rs525304:70506206:G:T	70660101	70660101	0	2.75735e-09	0.194471	0.030746	592476	Distal mGene
cg22492847	chr11	70756069	70756068	rs522044:70601423:T:C	70755318	70755318	0	2.56508e-07	0.0937714	0.0173676	497259	Distal mGene
cg22147748	chr11	71406708	71406707	rs1792244:71119186:C:G	71408140	71408140	0	7.28267e-13	-0.234564	0.029878	-155563	Distal non-mGene
cg20754476	chr11	71406634	71406633	11:71122749:TA:T	71411703	71411704	0	1.13143e-09	-0.183196	0.0281921	-159126	Distal non-mGene
cg23965588	chr11	71988122	71988121	rs6592455:71689541:A:G	71978495	71978495	0	4.29127e-07	-0.211881	0.0400667	456185	Distal non-mGene
cg10051714	chr11	72615095	72615094	rs10793014:71698838:A:G	71987792	71987792	0	4.03587e-07	-0.571041	0.107713	446888	Distal non-mGene
cg08315145	chr11	72239010	72239009	rs61736312:71945332:A:G	72234288	72234288	0	4.13813e-09	-0.222203	0.0355786	200392	Distal non-mGene
cg12467096	chr11	72225260	72225259	rs79345250:72012373:T:C	72301329	72301329	0	1.14137e-09	-0.281384	0.0433134	133351	Distal non-mGene
cg07062262	chr11	72431310	72431309	rs58945323:72042223:T:C	72331179	72331179	0	1.10277e-06	-0.227837	0.044844	103501	Distal mGene
cg12536891	chr11	72333786	72333785	rs4943891:72118827:C:A	72407783	72407783	0	3.01263e-13	-0.974954	0.121773	26897	Distal mGene
cg12536891	chr11	72333786	72333785	rs117703155:72146430:C:T	72435386	72435386	1	3.10021e-10	1.13264	0.167911	-506685	Distal non-mGene
cg21622630	chr11	72447472	72447471	rs72954113:72158572:G:A	72447528	72447528	0	1.73651e-10	0.290005	0.0423072	-366835	Distal non-mGene
cg14076183	chr11	72684464	72684463	rs34285624:72392383:C:T	72681338	72681338	0	1.63962e-08	0.164924	0.0276216	-6747	Distal non-mGene
cg08167047	chr11	72752374	72752373	rs77756118:72428038:T:G	72716993	72716993	0	5.48652e-08	0.426353	0.0744858	459701	Distal non-mGene
cg09722383	chr11	72701664	72701663	rs117337119:72569992:G:C	72858947	72858947	0	2.62382e-07	-0.212708	0.0394315	317747	Distal non-mGene
cg20212121	chr11	73198888	73198887	rs61519240:72898529:AT:A	73187484	73187485	0	5.91666e-09	0.140084	0.0226865	-393885	Distal non-mGene
cg23427969	chr11	73494682	73494681	rs623627:73004883:G:A	73293838	73293838	0	3.73913e-08	-0.144047	0.0248228	-500239	Distal non-mGene
cg23626200	chr11	73328085	73328084	rs57592318:73069538:C:G	73358493	73358493	0	1.63461e-17	-0.434822	0.0449281	287685	Distal non-mGene
cg03706479	chr11	73788865	73788864	rs7946127:73341588:A:G	73630543	73630543	0	1.62473e-09	-0.414471	0.0644776	15635	Distal non-mGene
cg01430283	chr11	73654415	73654414	rs622833	73654459	73654459	0	2.93768e-11	-0.205876	0.0286549	-56270	Distal non-mGene
cg00572664	chr11	74453680	74453679	rs9516:74166278:G:A	74455233	74455233	0	2.93093e-17	0.177114	0.0184859	38618	Distal non-mGene
cg18809093	chr11	75146400	75146399	rs4944990:74858213:C:G	75147168	75147168	0	7.53188e-08	0.114901	0.0203072	94005	Distal non-mGene
cg18113790	chr11	75430678	75430677	rs549794:75144186:G:A	75433141	75433141	0	8.75989e-09	-0.0909819	0.0149231	92762	Distal non-mGene
cg22129122	chr11	75432680	75432679	rs549794:75144186:G:A	75433141	75433141	0	1.52585e-07	-0.148708	0.0269893	92762	Distal non-mGene
cg09174715	chr11	75431607	75431606	rs1043638:75146384:A:G	75435339	75435339	0	2.69978e-07	0.124988	0.0231963	90564	Distal non-mGene
cg19644997	chr11	75443157	75443156	rs1790160:75180228:T:C	75469183	75469183	0	4.08302e-07	0.0959882	0.0181144	56720	Distal mGene
cg12318269	chr11	75525737	75525736	rs1790305:75232607:T:C	75521562	75521562	0	3.60906e-18	0.282385	0.028442	4341	Distal mGene
cg11926776	chr11	76152487	76152486	rs10899164:75868670:G:A	76157626	76157626	0	3.62857e-07	-0.0989463	0.018583	-342459	Distal non-mGene
cg06180869	chr11	76735726	76735725	rs60653432:76453602:T:TA	76742558	76742558	0	8.23663e-14	-0.301877	0.0366669	39693	Distal non-mGene
cg22138216	chr11	78078202	78078201	rs7943716:76837499:G:A	77126453	77126453	0	1.95769e-06	-0.0971183	0.0196128	1811	Promoter non-mGene
cg08294946	chr11	77127515	77127514	rs7104633:76840566:G:C	77129520	77129520	0	6.28078e-08	0.508171	0.0892165	-1256	Promoter mGene
cg03991848	chr11	77127453	77127452	rs7121629	77129752	77129752	0	2.63222e-12	0.306187	0.0401713	-1488	Promoter mGene
cg17441778	chr11	77127632	77127631	rs7121629	77129752	77129752	0	6.75504e-07	0.210849	0.0406332	-1488	Promoter mGene
cg02420069	chr11	77127704	77127703	rs7116928:76840972:C:T	77129926	77129926	0	3.59846e-08	0.243619	0.0419248	-1662	Promoter mGene
cg02174203	chr11	77137009	77137008	rs948969	77136989	77136989	0	1.99414e-10	-0.139869	0.0204824	-8725	Distal mGene
cg02003625	chr11	79092262	79092261	rs56035706:78807977:A:G	79096932	79096932	0	4.5206e-09	0.144561	0.0232116	344016	Distal mGene
cg14434300	chr11	82864134	82864133	rs7130900:82574135:C:T	82863093	82863093	0	2.2657e-15	-0.349951	0.0395413	-145011	Distal non-mGene
cg27561006	chr11	82900163	82900162	rs1939133:82602895:C:T	82891853	82891853	0	3.17591e-10	0.254741	0.0377903	394554	Distal non-mGene
cg18407818	chr11	83071605	83071604	rs35287388:82784147:G:A	83073105	83073105	0	3.43996e-23	0.194766	0.0164822	-102521	Distal non-mGene
cg20385188	chr11	83194787	83194786	rs11233494:82870156:A:G	83159114	83159114	0	2.40844e-09	0.201559	0.0317338	-188530	Distal non-mGene
cg14137939	chr11	85686067	85686066	rs4015271:85293107:T:G	85582063	85582063	0	3.18076e-07	0.132421	0.0247377	45859	Distal non-mGene
cg26697286	chr11	86202604	86202603	rs10898444:85907608:C:T	86196566	86196566	0	4.50546e-07	-0.151047	0.0286204	-126684	Distal non-mGene
cg08370040	chr11	86218391	86218390	rs9971532	86218448	86218448	0	9.5088e-23	-0.456511	0.0391797	-590526	Distal non-mGene
cg22266072	chr11	86459981	86459980	rs76401566:86170722:C:T	86459680	86459680	0	2.49347e-18	-0.323409	0.0323747	331379	Distal non-mGene
cg01234251	chr11	86870400	86870399	11:86584277:T:TAC	86873235	86873235	0	8.89829e-09	-0.149618	0.0245534	164609	Distal non-mGene
cg00653662	chr11	87005668	87005667	rs35236853:86654665:C:CA	86943623	86943623	0	3.6753e-22	-0.377483	0.0330194	94221	Distal non-mGene
cg13736861	chr11	92886391	92886390	rs4146883:92622011:C:T	92888845	92888845	0	6.12128e-09	0.149961	0.0243127	-2637613	Distal non-mGene
cg23417131	chr11	93133603	93133602	rs7121033:92958762:A:G	93225596	93225596	0	6.15434e-08	-0.174845	0.0306738	317912	Distal non-mGene
cg05500898	chr11	93775493	93775492	rs613610:93520726:T:C	93787560	93787560	0	2.7846e-07	-0.122097	0.0226878	1186052	Distal non-mGene
cg10920297	chr11	95070026	95070025	rs610183:94807581:A:G	95074417	95074417	0	1.44315e-07	-0.141131	0.0255594	1315572	Distal non-mGene
cg22049858	chr11	95150958	95150957	rs78484577:94883601:A:G	95150437	95150437	0	5.92067e-10	-0.306802	0.0463276	547649	Distal non-mGene
cg12853675	chr11	94272933	94272932	rs67670499:94900739:CTCAT:C	95167575	95167579	0	1.07963e-07	0.150344	0.0269296	530511	Distal non-mGene
cg14096249	chr11	95737079	95737078	rs10831418:95468828:A:G	95735664	95735664	0	5.82764e-07	0.123707	0.023692	-592027	Distal non-mGene
cg03916912	chr11	95789671	95789670	rs142472993:95507872:TATAAGA:T	95774708	95774714	0	1.09133e-26	0.305768	0.0232969	-624169	Distal non-mGene
cg06506128	chr11	95832525	95832524	rs4753701:95550810:C:G	95817646	95817646	0	9.97819e-07	-0.463223	0.0907761	572277	Distal non-mGene
cg25622487	chr11	95790879	95790878	rs564480:95561741:C:T	95828577	95828577	0	5.29485e-28	0.24013	0.017633	561412	Distal non-mGene
cg08412316	chr11	95925306	95925305	rs534973:95633624:A:T	95900460	95900460	0	4.19881e-09	0.121026	0.0193874	442720	Distal non-mGene
cg21913974	chr11	106077372	106077371	rs4565867:105948113:G:A	106077386	106077386	0	8.86931e-08	0.119309	0.0212142	-54983	Distal non-mGene
cg20889184	chr11	110201523	110201522	rs10709047:110078712:AT:A	110207987	110207988	0	1.18024e-07	0.116698	0.0209733	147143	Distal non-mGene
cg08911148	chr11	110438275	110438274	rs35073719:110296479:TA:T	110425755	110425756	0	4.53448e-13	-0.196297	0.02474	-129033	Distal non-mGene
cg08450021	chr11	111230793	111230792	rs7933784:111101603:G:A	111230878	111230878	0	4.45673e-11	0.254562	0.0358138	-875748	Distal non-mGene
cg14146407	chr11	112086905	112086904	rs34060775:111117906:T:C	111247181	111247181	0	2.66976e-06	-0.143178	0.0293325	-950459	Distal non-mGene
cg23591869	chr11	111299924	111299923	rs7944895:111167776:C:G	111297051	111297051	0	2.21097e-07	0.0784357	0.0144422	158579	Distal non-mGene
cg12832280	chr11	111436707	111436706	rs11603094:111307696:C:T	111436971	111436971	0	3.49494e-08	0.124214	0.0213542	-191166	Distal non-mGene
cg03803789	chr11	111983280	111983279	rs45524342:111581143:A:T	111710419	111710419	0	5.50131e-10	-0.251039	0.0378272	-108028	Distal non-mGene
cg05330301	chr11	111736337	111736336	rs67420946:111583916:AAGTT:A	111713192	111713196	0	9.07135e-11	-0.160227	0.0229678	-110801	Distal non-mGene
cg18672335	chr11	111763598	111763597	rs7106104:111635655:T:C	111764931	111764931	0	1.82771e-15	-0.26483	0.0298005	-162540	Distal non-mGene
cg22892154	chr11	111926750	111926749	rs35964014:111795318:A:G	111924594	111924594	0	2.28904e-11	0.581655	0.0804455	-45169	Distal non-mGene
cg05297139	chr11	112226035	112226034	rs1154763	112224316	112224316	0	9.60404e-31	-0.593223	0.04048	46433	Distal non-mGene
cg25613910	chr11	112280110	112280109	11:112149344:C:T	112278621	112278621	0	1.51716e-16	0.898469	0.0965429	-103154	Distal non-mGene
cg09135584	chr11	112280153	112280152	11:112149344:C:T	112278621	112278621	0	5.68265e-19	1.25483	0.122623	-103154	Distal non-mGene
cg14747847	chr11	112270604	112270603	rs2853123:112155350:T:C	112284627	112284627	0	1.20755e-19	0.386204	0.0368256	-197854	Distal non-mGene
cg19588569	chr11	113376315	113376314	rs75460764:112478343:C:T	112607620	112607620	0	1.48435e-06	-0.409387	0.0816453	353627	Distal non-mGene
cg19624354	chr11	113243169	113243168	rs586903	113240224	113240224	0	2.0277e-26	-1.03351	0.0793539	-847106	Distal non-mGene
cg08743050	chr11	113243215	113243214	rs586903	113240224	113240224	0	1.10038e-27	-0.957343	0.0709208	-847106	Distal non-mGene
cg24963613	chr11	113279034	113279033	rs667800:113149690:C:A	113278968	113278968	0	2.69526e-10	-0.126464	0.0186748	-1052603	Distal non-mGene
cg11546510	chr11	113629107	113629106	rs10750027:113591832:G:A	113721110	113721110	0	5.94885e-10	-0.139168	0.0210175	-406673	Distal non-mGene
cg16384885	chr11	114060046	114060045	rs6589409:113927448:T:A	114056726	114056726	0	9.96826e-09	0.211977	0.034917	299845	Distal non-mGene
cg24709257	chr11	115395637	115395636	rs34396473:115293749:G:GT	115423030	115423030	0	1.00673e-06	-0.134735	0.0264137	81927	Distal mGene
cg05256304	chr11	117099155	117099154	rs7117123:116853686:T:A	116982970	116982970	0	6.13615e-21	0.331782	0.0302331	115467	Distal mGene
cg20608306	chr11	117098975	117098974	rs10892073:116969390:C:T	117098674	117098674	0	4.00257e-24	0.405939	0.0333674	-237	Promoter mGene
cg10163427	chr11	117099284	117099283	rs10892073:116969390:C:T	117098674	117098674	0	4.99452e-12	0.206452	0.0275014	-237	Promoter mGene
cg05122696	chr11	117099287	117099286	rs10892073:116969390:C:T	117098674	117098674	0	3.14731e-16	0.282326	0.0307414	-237	Promoter mGene
cg10130564	chr11	117199134	117199133	rs35590772:117091251:TG:T	117220535	117220536	0	1.46041e-11	-0.178827	0.0244548	-122098	Distal non-mGene
cg21210690	chr11	117443528	117443527	rs11216394:117315692:A:G	117444976	117444976	0	2.30711e-07	0.0745463	0.0137491	372549	Distal mGene
cg10274934	chr11	117663370	117663369	rs7111427:117534083:G:A	117663368	117663368	0	2.33576e-19	-0.311428	0.030005	154157	Distal mGene
cg12259643	chr11	117730699	117730698	rs4142639:117604493:A:G	117733778	117733778	0	5.71084e-15	-0.363064	0.0417662	83747	Distal mGene
cg21640587	chr11	117797324	117797323	rs12363806:117658211:G:A	117787496	117787496	0	9.02308e-12	0.144789	0.0195659	30029	Distal mGene
cg10041129	chr11	117814836	117814835	rs10892172:117672474:C:A	117801759	117801759	0	8.7674e-07	0.1308	0.0254892	15766	Distal non-mGene
cg21014159	chr11	117797321	117797320	rs12364667:117675286:T:G	117804571	117804571	0	1.3654e-13	0.156596	0.0192263	12954	Distal mGene
cg11333886	chr11	117797328	117797327	rs12364667:117675286:T:G	117804571	117804571	0	3.90132e-09	0.135735	0.0216932	12954	Distal mGene
cg07367495	chr11	117817618	117817617	rs610226:117688225:G:C	117817510	117817510	0	5.46202e-11	-0.296641	0.0419558	15	Promoter non-mGene
cg26293590	chr11	117817621	117817620	rs610226:117688225:G:C	117817510	117817510	0	2.00881e-11	-0.281138	0.0387545	15	Promoter non-mGene
cg23323203	chr11	117817624	117817623	rs610226:117688225:G:C	117817510	117817510	0	3.9101e-07	-0.179198	0.0337575	15	Promoter non-mGene
cg25550323	chr11	117823348	117823347	rs501171:117692394:C:T	117821679	117821679	0	3.81615e-08	0.192014	0.0331128	-507122	Distal non-mGene
cg15983698	chr11	117902144	117902143	rs11601073:117776747:C:T	117906032	117906032	0	1.10392e-08	0.143268	0.0236789	-29365	Distal non-mGene
cg06090739	chr11	118360008	118360007	rs17122113:118234678:A:G	118363963	118363963	0	5.55558e-13	0.218631	0.0276797	-138869	Distal non-mGene
cg15880738	chr11	118344398	118344397	rs11216861:118241516:G:A	118370801	118370801	0	5.61734e-10	-0.148639	0.0224108	65689	Distal non-mGene
cg01237326	chr11	119022284	119022283	rs12280288:118892940:T:C	119022230	119022230	0	1.2006e-15	-0.243698	0.0272045	34972	Distal non-mGene
cg18351479	chr11	118998055	118998054	rs11006:118895202:A:G	119024492	119024492	0	5.41525e-08	0.110535	0.0193018	32710	Distal non-mGene
cg20080383	chr11	119084417	119084416	rs7479182:118930202:A:G	119059491	119059491	0	1.44058e-12	0.26652	0.0344802	-41059	Distal non-mGene
cg26145333	chr11	119088032	119088031	rs17075:118959331:G:A	119088621	119088621	0	2.70243e-07	-0.102586	0.0190395	293105	Distal non-mGene
cg11367048	chr11	119088439	119088438	rs17075:118959331:G:A	119088621	119088621	0	4.15345e-20	-0.394631	0.0370128	293105	Distal non-mGene
cg01880540	chr11	119107172	119107171	rs639373	119106009	119106009	0	7.15511e-12	0.0884406	0.0118839	234931	Distal non-mGene
cg19123966	chr11	119321911	119321910	rs7944487:119192956:A:G	119322246	119322246	0	1.22073e-08	0.115059	0.0190803	-125477	Distal non-mGene
cg17681745	chr11	119364633	119364632	rs573396:119239375:G:A	119368665	119368665	0	5.87571e-09	-0.15722	0.025456	-283799	Distal non-mGene
cg14154726	chr11	119365009	119365008	rs680268:119239689:C:T	119368979	119368979	0	1.9468e-08	-0.201747	0.0339865	-284113	Distal non-mGene
cg01451205	chr11	119381501	119381500	rs658654:119248320:C:T	119377610	119377610	0	1.03586e-16	0.27495	0.0293427	4116	Distal mGene
cg11899762	chr11	119717968	119717967	rs12421432:119603847:C:T	119733137	119733137	0	9.1326e-11	0.269065	0.0385761	-4053	Distal non-mGene
cg08434994	chr11	119634958	119634957	rs77648265:119977910:T:G	120107202	120107202	0	1.00081e-08	-0.718705	0.118401	-725424	Distal non-mGene
cg12448476	chr11	120108353	120108352	rs4938783:119979013:G:A	120108305	120108305	0	3.64498e-08	-0.101931	0.0175494	-726527	Distal non-mGene
cg03632278	chr11	120186241	120186240	rs7128147:119989636:C:T	120118928	120118928	0	9.95762e-08	-0.128162	0.0228869	-737150	Distal non-mGene
cg24611264	chr11	120138237	120138236	rs470411:120012390:G:C	120141682	120141682	0	4.53246e-17	0.294757	0.0309996	-533259	Distal non-mGene
cg15392029	chr11	120325009	120325008	rs12290699:120195702:T:C	120324993	120324993	0	1.78484e-07	0.142924	0.0260971	3033435	Distal non-mGene
cg06233497	chr11	120329545	120329544	rs11217821	120331390	120331390	0	1.08355e-07	0.190201	0.0340735	5524	Distal non-mGene
cg23774385	chr11	120331348	120331347	rs11217821	120331390	120331390	0	2.02388e-14	0.242619	0.0286248	5524	Distal non-mGene
cg12584626	chr11	120332821	120332820	rs71468750:120205560:G:A	120334851	120334851	0	1.72364e-09	0.175484	0.0273481	2063	Promoter non-mGene
cg06121692	chr11	120929746	120929745	rs12796452:120800956:G:C	120930247	120930247	0	1.03585e-10	0.191157	0.027499	-418488	Distal mGene
cg05419849	chr11	120934552	120934551	rs4936565:120802006:G:A	120931297	120931297	0	7.3376e-07	0.147047	0.0284374	-419538	Distal mGene
cg22025859	chr11	120929834	120929833	rs4936567:120819893:G:T	120949184	120949184	0	6.24374e-11	0.187606	0.0266275	-437425	Distal mGene
cg18247436	chr11	120985938	120985937	rs584092	120952687	120952687	0	4.45587e-11	0.573681	0.0807098	-440928	Distal mGene
cg12122877	chr11	120986415	120986414	rs734167:120829359:G:A	120958650	120958650	1	4.43965e-13	0.972053	0.122454	-446891	Distal non-mGene
cg19859759	chr11	121662216	121662215	rs540860:121530888:A:G	121660179	121660179	0	1.41714e-11	0.160054	0.0218712	896542	Distal non-mGene
cg03198327	chr11	123183689	123183688	rs113828677:123279988:T:A	123409280	123409280	0	1.14928e-07	-0.71504	0.128381	-107890	Distal non-mGene
cg01056444	chr11	123483724	123483723	rs2714084	123490312	123490312	0	1.38049e-29	1.00106	0.0704199	-131884	Distal non-mGene
cg03311923	chr11	123483939	123483938	rs2714084	123490312	123490312	0	1.01718e-18	0.52538	0.051826	-131884	Distal non-mGene
cg06979374	chr11	123585387	123585386	rs4936820:123394265:C:T	123523557	123523557	0	9.86937e-08	-0.170985	0.0305239	-165129	Distal mGene
cg19038246	chr11	123475071	123475070	rs4936820:123394265:C:T	123523557	123523557	0	1.40897e-10	-0.485124	0.0703697	-165129	Distal non-mGene
cg13709043	chr11	123475270	123475269	rs4936820:123394265:C:T	123523557	123523557	0	5.06268e-11	-0.572365	0.0807926	-165129	Distal non-mGene
cg05868564	chr11	123480790	123480789	rs4936820:123394265:C:T	123523557	123523557	0	4.96238e-10	-0.613784	0.0922133	-165129	Distal non-mGene
cg02613090	chr11	123510687	123510686	rs4936820:123394265:C:T	123523557	123523557	0	4.13288e-10	-0.427421	0.0638806	-165129	Distal non-mGene
cg24961445	chr11	123573929	123573928	rs17127435:123395348:A:G	123524640	123524640	0	3.86696e-11	-0.341836	0.0479158	-166212	Distal mGene
cg09612920	chr11	123568923	123568922	rs2846310:123397869:G:A	123527161	123527161	0	7.44767e-11	0.198	0.0282339	-168733	Distal mGene
cg12728690	chr11	123575663	123575662	rs2846310:123397869:G:A	123527161	123527161	0	2.30091e-10	0.297212	0.0436962	-168733	Distal mGene
cg16689797	chr11	123546753	123546752	rs7110875	123528233	123528233	0	5.53319e-07	-0.112012	0.0214057	-169805	Distal mGene
cg06797734	chr11	123577674	123577673	rs11219187:123399886:T:C	123529178	123529178	0	1.75746e-06	0.113926	0.0228943	-170750	Distal mGene
cg13364241	chr11	123557089	123557088	rs2714067:123400286:A:G	123529578	123529578	0	4.96015e-08	0.207254	0.0360767	-171150	Distal mGene
cg26041232	chr11	123577455	123577454	rs2846297:123403104:C:A	123532396	123532396	0	1.45634e-06	-0.122955	0.0245005	-173968	Distal mGene
cg12548264	chr11	123558817	123558816	rs1296498:123417066:C:T	123546358	123546358	0	5.4441e-08	-0.227524	0.0397384	-187930	Distal mGene
cg01246664	chr11	123551220	123551219	rs56028970:123421955:T:C	123551247	123551247	0	4.32368e-13	-0.667	0.0839755	-192819	Distal mGene
cg22338845	chr11	123558835	123558834	rs61129032:123424045:T:TTAACTAATATGTAGAAGGAGACC	123553337	123553337	0	1.24395e-09	-0.184088	0.0284093	-194909	Distal mGene
cg10227124	chr11	123559130	123559129	rs2003795:123428835:T:G	123558127	123558127	0	9.27011e-17	-0.41903	0.0446304	-199699	Distal mGene
cg12577455	chr11	125433355	125433354	rs2555222:125303491:G:A	125433595	125433595	0	8.86031e-12	0.323542	0.043702	-479474	Distal non-mGene
cg23727983	chr11	125904188	125904187	rs10717222:125763567:C:T	125893672	125893672	0	1.26436e-10	-0.187869	0.0271715	-301104	Distal non-mGene
cg27313691	chr11	126197774	126197773	rs693789:126068642:G:A	126198747	126198747	0	4.61431e-07	0.124116	0.0235406	-295399	Distal non-mGene
cg20031656	chr11	125496372	125496371	rs71475941:126080776:G:A	126210881	126210881	0	1.0256e-07	0.302334	0.05405	-271965	Distal non-mGene
cg19767249	chr11	126303743	126303742	rs3781772:126181185:C:T	126311290	126311290	0	3.42504e-27	0.824011	0.0618925	692170	Distal non-mGene
cg18280382	chr11	126356102	126356101	rs12792946:126478243:T:A	126608348	126608348	0	5.98863e-07	-0.438794	0.0841324	395112	Distal non-mGene
cg05717707	chr11	126991596	126991595	rs587590:126861960:A:G	126992064	126992064	0	3.03392e-07	-0.187057	0.034878	11396	Distal mGene
cg17273911	chr11	127002969	127002968	rs522686:126869538:C:T	126999642	126999642	0	6.78167e-09	-0.155431	0.0252828	3818	Distal non-mGene
cg01919956	chr11	128179424	128179423	rs1648180:128049402:A:G	128179507	128179507	0	5.95739e-10	-0.235873	0.0356235	687866	Distal non-mGene
cg04583498	chr11	128556020	128556019	rs369371033:128705111:ATATT:A	128835216	128835220	0	7.22108e-08	0.243686	0.0430014	-654789	Distal non-mGene
cg04608907	chr11	130894040	130894039	rs73024809:130741282:C:T	130871387	130871387	0	3.40011e-10	0.201228	0.0299091	-442394	Distal non-mGene
cg09137382	chr11	130861567	130861566	rs7937514:130760203:C:T	130890308	130890308	0	4.67568e-13	0.166773	0.0210333	-575315	Distal non-mGene
cg14926494	chr11	130894307	130894306	rs75011833:130764418:C:G	130894523	130894523	0	5.31916e-07	0.293304	0.0559586	-579530	Distal non-mGene
cg23727966	chr11	130890689	130890688	rs7925664:130764526:C:T	130894631	130894631	0	3.0516e-18	0.160928	0.0161636	-579638	Distal non-mGene
cg07296705	chr11	131392689	131392688	rs10791140:131242104:C:T	131372209	131372209	0	6.57409e-10	0.158566	0.0240163	-1731	Promoter mGene
cg22074083	chr11	131545917	131545916	rs34610016:131370817:AT:A	131500923	131500924	0	3.38311e-07	-0.128798	0.0241209	-266385	Distal non-mGene
cg00864721	chr11	131581881	131581880	rs2458764:131451832:A:C	131581938	131581938	0	7.39445e-33	-0.418482	0.0270634	-211460	Distal mGene
cg06136054	chr11	131674402	131674401	rs813146:131541003:A:G	131671109	131671109	0	7.52204e-18	0.299211	0.0305101	-300631	Distal mGene
cg27312388	chr11	132994271	132994270	rs1506881:132864266:G:A	132994371	132994371	0	4.29741e-07	0.150561	0.0284729	-1623893	Distal non-mGene
cg23522601	chr11	133064483	133064482	rs12361143:132934432:G:C	133064537	133064537	0	1.41944e-10	0.331474	0.0480917	-1694059	Distal non-mGene
cg00579200	chr11	133835341	133835340	rs10791322:133702429:G:A	133832534	133832534	0	5.27179e-32	-0.796638	0.0526331	-300015	Distal non-mGene
cg15485101	chr11	133864572	133864571	rs11604410:133702779:T:G	133832884	133832884	0	1.94737e-09	0.200407	0.0313481	-300365	Distal non-mGene
cg06766960	chr11	133833200	133833199	rs2250123:133710796:T:C	133840901	133840901	0	2.43747e-08	-0.274094	0.0465319	-308382	Distal non-mGene
cg18057887	chr11	133931019	133931018	rs11223627:133800769:G:A	133930874	133930874	0	9.21109e-12	-0.219307	0.0296508	101398	Distal non-mGene
cg03392386	chr11	133930906	133930905	rs12796441:133800773:C:A	133930878	133930878	0	8.85779e-12	-0.114729	0.0154967	101394	Distal non-mGene
cg15249926	chr11	134125893	134125892	11:134017354:CAAAA:C	134147459	134147463	0	1.60141e-07	-0.144733	0.0263168	-115187	Distal non-mGene
cg06623962	chr11	134149497	134149496	rs597320:134019361:G:A	134149466	134149466	0	8.14431e-31	0.868214	0.0591347	-117194	Distal non-mGene
cg06345411	chr11	134149507	134149506	rs597320:134019361:G:A	134149466	134149466	0	7.30614e-28	0.870662	0.0641816	-117194	Distal non-mGene
cg08336478	chr11	134149546	134149545	rs597320:134019361:G:A	134149466	134149466	0	1.19042e-24	0.653296	0.052845	-117194	Distal non-mGene
cg13010216	chr12	959027	959026	rs11571383:1058756:T:TC	949590	949590	0	3.18988e-11	-0.43648	0.0608799	-285811	Distal non-mGene
cg22243222	chr12	950134	950133	rs10849605:1064438:T:C	955272	955272	0	5.68119e-12	0.112243	0.0149982	-291493	Distal non-mGene
cg05658137	chr12	1122960	1122959	rs10773929:1236086:G:A	1126920	1126920	0	4.61739e-10	0.140783	0.0211074	402971	Distal non-mGene
cg20417207	chr12	1560055	1560054	rs12320455:1669108:C:T	1559942	1559942	0	5.15493e-12	0.194056	0.0258697	-569433	Distal non-mGene
cg04979811	chr12	1605753	1605752	rs7308793	1601943	1601943	0	9.21584e-07	-0.124061	0.024228	-611434	Distal non-mGene
cg02508878	chr12	1644737	1644736	rs11061894:1753187:T:C	1644021	1644021	0	7.75956e-13	-0.265928	0.0339215	44553	Distal non-mGene
cg05227549	chr12	1661617	1661616	rs7980272:1906208:C:T	1797042	1797042	0	5.97815e-09	0.347336	0.0562696	139532	Distal non-mGene
cg21224286	chr12	1800751	1800750	rs6489330:1907853:A:G	1798687	1798687	0	2.31078e-17	0.318997	0.0331577	137887	Distal non-mGene
cg12859507	chr12	1800798	1800797	rs6489330:1907853:A:G	1798687	1798687	0	8.01476e-21	0.557174	0.0509738	137887	Distal non-mGene
cg25519930	chr12	2052475	2052474	rs765124:2156145:T:G	2046979	2046979	0	1.0208e-07	-0.39652	0.0708756	-76193	Distal mGene
cg23524436	chr12	2052272	2052271	rs723672:2161561:C:T	2052395	2052395	0	8.90258e-08	0.122686	0.0218176	-81609	Distal mGene
cg10039504	chr12	3133107	3133106	rs7975449	3133513	3133513	0	6.62569e-13	-0.199659	0.0253778	-56158	Distal mGene
cg09308288	chr12	7090114	7090113	rs182520773:6830582:T:C	6721416	6721416	0	4.14283e-07	0.398447	0.0752378	-58268	Distal non-mGene
cg23255995	chr12	6753063	6753062	rs2302368	6750631	6750631	0	5.1587e-24	0.371203	0.0306157	21881	Distal non-mGene
cg22908581	chr12	6789810	6789809	rs7296859:6894164:C:G	6784998	6784998	1	2.48661e-08	-0.701616	0.119193	1860	Promoter mGene
cg20093940	chr12	6820919	6820918	rs67162478:6926962:AC:A	6817796	6817797	0	1.03517e-07	0.254811	0.0455698	-33635	Distal non-mGene
cg14371571	chr12	6821448	6821447	rs3741920	6829708	6829708	0	1.48913e-13	0.468534	0.057632	-105967	Distal non-mGene
cg17805404	chr12	6821459	6821458	rs3741920	6829708	6829708	0	4.36309e-14	0.458838	0.0549955	-105967	Distal non-mGene
cg10970328	chr12	6822360	6822359	rs3741920	6829708	6829708	0	1.16367e-10	0.168284	0.0242845	-105967	Distal non-mGene
cg00127414	chr12	6829720	6829719	rs3741920	6829708	6829708	0	7.76409e-16	0.387084	0.0428584	-105967	Distal non-mGene
cg26751275	chr12	6923914	6923913	rs5441:6949026:A:G	6839862	6839862	0	8.42904e-07	0.0909591	0.0176953	-72387	Distal non-mGene
cg17456112	chr12	6869387	6869386	rs12302749	6867132	6867132	0	9.32937e-07	-0.0904994	0.0176832	57331	Distal non-mGene
cg26269324	chr12	6867921	6867920	rs2071069:6979010:G:A	6869846	6869846	0	1.12334e-22	0.1503	0.0129294	54617	Distal non-mGene
cg23616620	chr12	6904657	6904656	rs200627370:7013820:CGA:C	6904656	6904658	0	6.98764e-13	0.668747	0.0851034	-64702	Distal non-mGene
cg12119858	chr12	6914032	6914031	rs2071419:7026932:T:C	6917768	6917768	0	2.35949e-07	-0.124119	0.0229123	-50649	Distal non-mGene
cg13593553	chr12	7108293	7108292	rs34879108:7246403:C:T	7093807	7093807	0	1.97286e-08	0.191395	0.0322571	-150829	Distal non-mGene
cg19244639	chr12	7190739	7190738	rs12312641:7340994:G:A	7188398	7188398	0	1.48989e-08	0.364005	0.0607671	-245420	Distal non-mGene
cg17525411	chr12	7188985	7188984	rs2290241:7341343:G:A	7188747	7188747	0	1.62092e-07	0.16626	0.0302451	-245769	Distal non-mGene
cg09923796	chr12	8539298	8539297	rs372514832:8014515:G:A	7861919	7861919	0	3.42383e-08	0.773816	0.132934	133165	Distal non-mGene
cg01627669	chr12	7916111	7916110	rs34320554:8020440:CA:C	7867844	7867845	0	2.36731e-11	-0.18999	0.0262989	127240	Distal non-mGene
cg06645921	chr12	7872799	7872798	rs143068591:8020553:TTAA:T	7867957	7867960	0	9.48583e-09	0.612639	0.10075	127127	Distal non-mGene
cg11207307	chr12	7872998	7872997	rs10846078	7869336	7869336	0	3.49065e-07	0.594083	0.111399	125748	Distal non-mGene
cg23243991	chr12	10674796	10674795	rs2418097:10827276:G:A	10674677	10674677	0	3.34157e-08	-0.387692	0.0665447	-448619	Distal non-mGene
cg03985116	chr12	10710391	10710390	rs12317203:10876059:G:T	10723460	10723460	0	9.93205e-14	0.225868	0.0275435	-511002	Distal non-mGene
cg22134853	chr12	10723484	10723483	rs11053915:10876805:G:C	10724206	10724206	0	1.94217e-09	0.0914583	0.0143049	-511748	Distal non-mGene
cg20028194	chr12	12718979	12718978	rs77216612:12877983:A:G	12725049	12725049	0	4.5039e-10	-0.256469	0.0384247	-367970	Distal non-mGene
cg26386886	chr12	12718991	12718990	rs77216612:12877983:A:G	12725049	12725049	0	9.32946e-08	-0.192678	0.0343243	-367970	Distal non-mGene
cg09462578	chr12	12725495	12725494	rs148910232:12878572:CGGCCCCAGCCCCCGCGCCCGCCCGG:C	12725638	12725663	0	2.14775e-28	-0.389426	0.0282896	-368559	Distal non-mGene
cg00512404	chr12	14961799	14961798	rs10846097:15123071:C:T	14970137	14970137	0	1.2446e-08	0.163941	0.0272039	-166597	Distal non-mGene
cg12507643	chr12	15002004	15002003	rs11056282:15154400:G:C	15001466	15001466	0	9.32265e-15	0.227033	0.0263717	-197894	Distal non-mGene
cg06254629	chr12	15002298	15002297	rs11056282:15154400:G:C	15001466	15001466	0	2.70703e-09	0.177269	0.0280103	-197894	Distal non-mGene
cg14101998	chr12	15576483	15576482	rs12231793:15736991:T:C	15584057	15584057	0	7.76368e-10	-0.164617	0.0250536	-261660	Distal mGene
cg23028209	chr12	19198435	19198434	rs10667790:19361353:A:AAG	19208419	19208419	0	1.43714e-06	0.150409	0.0299531	7624779	Distal non-mGene
cg04565065	chr12	23098882	23098881	rs10842104:23215516:G:C	23062582	23062582	0	3.46868e-08	-0.16221	0.0278788	-362723	Distal non-mGene
cg15460816	chr12	24997469	24997468	rs11047746:25147358:C:T	24994424	24994424	0	6.47089e-19	-0.331687	0.0324807	200738	Distal non-mGene
cg05257196	chr12	24998019	24998018	rs12227003:25154734:C:G	25001800	25001800	0	9.18291e-20	-0.331049	0.0314321	193362	Distal non-mGene
cg02873991	chr12	24998330	24998329	rs12227003:25154734:C:G	25001800	25001800	0	7.72458e-16	-0.259351	0.028713	193362	Distal non-mGene
cg01616568	chr12	25386679	25386678	rs7966714:25539628:A:T	25386694	25386694	0	3.49049e-13	0.135279	0.0169512	-380291	Distal non-mGene
cg25670473	chr12	26018771	26018770	rs10842674:26246239:G:A	26093306	26093306	0	5.43158e-07	-0.163604	0.0312408	739892	Distal non-mGene
cg00296804	chr12	29066387	29066386	rs35039440:29226555:G:GC	29073622	29073622	0	1.36027e-11	-0.103664	0.0141512	75481	Distal non-mGene
cg19432600	chr12	31636764	31636763	rs12826630:31782588:C:T	31629654	31629654	0	1.13772e-20	0.242992	0.0223473	-38557	Distal non-mGene
cg20755748	chr12	31646183	31646182	rs10843989:31799091:C:T	31646157	31646157	0	1.04916e-10	0.197247	0.0283848	-55060	Distal non-mGene
cg19560014	chr12	31646185	31646184	rs11519375:31802619:T:C	31649685	31649685	0	6.94942e-09	-0.166175	0.0270519	-58588	Distal non-mGene
cg17560472	chr12	31959353	31959352	rs12370315:32112292:G:C	31959358	31959358	0	4.03382e-31	0.599373	0.0405033	-230184	Distal non-mGene
cg20731015	chr12	31959396	31959395	rs12370315:32112292:G:C	31959358	31959358	0	1.35954e-07	0.0925436	0.0167219	-230184	Distal non-mGene
cg01850464	chr12	32399346	32399345	rs189221759:32453669:C:T	32300735	32300735	0	2.35071e-11	0.606771	0.0839757	-571561	Distal non-mGene
cg00545801	chr12	32302392	32302391	rs3844105	32302421	32302421	0	8.67403e-21	1.1375	0.104189	-573247	Distal non-mGene
cg00545801	chr12	32302392	32302391	rs1239585:32458281:C:G	32305347	32305347	1	6.06433e-17	0.888098	0.0938809	-576173	Distal non-mGene
cg10737105	chr12	32402269	32402268	rs2651370:32558025:A:G	32405091	32405091	0	6.04551e-08	0.196832	0.0345085	274109	Distal non-mGene
cg17069347	chr12	32400322	32400321	rs79727589:32561436:C:G	32408502	32408502	0	8.29665e-13	0.230923	0.029501	270698	Distal non-mGene
cg26981703	chr12	38275327	38275326	rs60358196:39315637:C:T	38921835	38921835	0	2.50423e-06	0.203292	0.0415235	171039	Distal non-mGene
cg10161289	chr12	42145688	42145687	rs1986088:42404390:C:T	42010588	42010588	0	1.75106e-07	-0.119859	0.0218693	-822140	Distal non-mGene
cg17420585	chr12	42145590	42145589	rs11181305:42438648:G:T	42044846	42044846	0	2.88564e-12	-0.16887	0.0222035	-856398	Distal non-mGene
cg10694539	chr12	42144735	42144734	rs11453537:42536324:A:AT	42142522	42142522	0	1.23816e-13	0.209094	0.025618	95827	Distal non-mGene
cg13431800	chr12	42125502	42125501	rs67788023:42536684:A:T	42142882	42142882	0	2.07531e-15	-0.266187	0.0300261	95467	Distal non-mGene
cg19980929	chr12	42239106	42239105	rs7974654:42630466:C:A	42236664	42236664	0	1.43297e-21	0.354795	0.0316472	-91785	Distal non-mGene
cg21066679	chr12	42326751	42326750	rs12228205:42749339:T:G	42355537	42355537	0	9.84231e-09	-0.184072	0.0303078	-1663095	Distal non-mGene
cg07582407	chr12	45988510	45988509	rs11183272:46382256:C:A	45988473	45988473	0	1.68772e-07	0.103131	0.0187903	-260698	Distal non-mGene
cg00366859	chr12	48682016	48682015	rs7965889:49018032:T:A	48624249	48624249	0	1.68009e-10	0.0927028	0.0135117	-443036	Distal non-mGene
cg15866213	chr12	48716776	48716775	rs7979247:49018127:A:G	48624344	48624344	0	8.69467e-13	0.213248	0.0272719	-443131	Distal non-mGene
cg22514963	chr12	48866215	48866214	rs3782360	48863009	48863009	0	1.14142e-36	-0.505251	0.0298127	136300	Distal non-mGene
cg25950278	chr12	48994630	48994629	rs1054442:49389320:A:C	48995537	48995537	0	1.42386e-11	0.168968	0.023092	-129639	Distal non-mGene
cg00757327	chr12	48997124	48997123	exm999341	48996894	48996894	0	4.17936e-25	0.205064	0.0163627	-130996	Distal non-mGene
cg20987850	chr12	49215396	49215395	rs35273099:49609515:TA:T	49215732	49215733	0	3.34348e-08	-0.283299	0.0486272	-84335	Distal non-mGene
cg21874412	chr12	49283722	49283721	rs71760659:49679118:C:CTT	49285335	49285335	0	1.58583e-20	-0.536518	0.0495891	81249	Distal non-mGene
cg07028869	chr12	49347382	49347381	rs74089059:49740847:G:T	49347064	49347064	0	2.12425e-08	0.306461	0.0517809	19520	Distal non-mGene
cg15111593	chr12	49366440	49366439	rs11168988:49755234:A:G	49361451	49361451	0	7.78087e-08	-0.164423	0.0290944	5133	Distal mGene
cg15179107	chr12	49752481	49752480	rs76059547:50100071:C:T	49706288	49706288	0	1.438e-08	-0.332921	0.0555118	1877	Promoter non-mGene
cg26335476	chr12	49961836	49961835	rs3759129:50354437:A:C	49960654	49960654	0	4.03298e-12	0.367468	0.0487006	96894	Distal non-mGene
cg23855989	chr12	49962039	49962038	rs3759129:50354437:A:C	49960654	49960654	0	4.75546e-17	0.302148	0.0318037	96894	Distal non-mGene
cg04450003	chr12	49962213	49962212	rs3759129:50354437:A:C	49960654	49960654	0	6.06195e-12	0.281192	0.0376326	96894	Distal non-mGene
cg24352499	chr12	49966994	49966993	rs296759	49966678	49966678	0	1.36324e-12	-0.125943	0.0162728	90870	Distal non-mGene
cg24871217	chr12	49966714	49966713	rs296763:50363014:G:C	49969231	49969231	0	1.39637e-07	-0.119634	0.021639	88317	Distal non-mGene
cg19604907	chr12	50050941	50050940	exm2260081	49972517	49972517	0	9.12501e-07	-0.182229	0.0355726	85031	Distal non-mGene
cg16544320	chr12	50072346	50072345	rs17124219:50368740:T:C	49974957	49974957	0	7.25031e-07	0.209631	0.0405199	82591	Distal mGene
cg08189863	chr12	50074842	50074841	rs706791:50465355:A:G	50071572	50071572	0	1.35215e-23	-0.372094	0.0310901	-109702	Distal non-mGene
cg25034792	chr12	50167849	50167848	rs73106145:50561359:G:C	50167576	50167576	0	4.82687e-18	-1.01631	0.102861	-110028	Distal non-mGene
cg18077304	chr12	51424266	51424265	rs201861307:51810000:T:TG	51416216	51416216	0	1.87534e-07	-0.316579	0.0579168	398827	Distal non-mGene
cg05807813	chr12	51424318	51424317	rs144594375:51814802:A:ATG	51421018	51421018	0	1.38925e-19	-0.545332	0.0521131	394025	Distal non-mGene
cg02303897	chr12	52874353	52874352	rs4919738:53270845:C:T	52877061	52877061	0	1.60453e-16	0.511055	0.0549697	-509580	Distal non-mGene
cg17419626	chr12	52874485	52874484	rs4919738:53270845:C:T	52877061	52877061	0	1.97222e-30	0.654959	0.0450579	-509580	Distal non-mGene
cg02259081	chr12	52874650	52874649	rs4919738:53270845:C:T	52877061	52877061	0	5.68663e-24	0.539074	0.0445193	-509580	Distal non-mGene
cg06553033	chr12	52876456	52876455	rs4919738:53270845:C:T	52877061	52877061	0	1.15362e-15	0.14646	0.0163374	-509580	Distal non-mGene
cg08553726	chr12	52876582	52876581	rs4919738:53270845:C:T	52877061	52877061	0	6.33934e-18	0.317508	0.0322826	-509580	Distal non-mGene
cg04250404	chr12	52879969	52879968	rs11831942:53272113:T:G	52878329	52878329	0	2.78223e-19	0.328689	0.0317558	-510848	Distal non-mGene
cg12586596	chr12	53251948	53251947	rs148152366:53645921:C:T	53252137	53252137	0	9.46975e-10	1.11439	0.170593	-19157	Distal non-mGene
cg03744437	chr12	53251952	53251951	rs56297209:53646327:G:C	53252543	53252543	0	4.02667e-08	0.432473	0.0747219	-19563	Distal non-mGene
cg27467734	chr12	53252379	53252378	rs56297209:53646327:G:C	53252543	53252543	0	4.61046e-18	0.933116	0.0943688	-19563	Distal non-mGene
cg12835684	chr12	53251864	53251863	rs182875610:53650277:C:T	53256493	53256493	0	7.58457e-09	0.357891	0.0584271	-23513	Distal non-mGene
cg19049858	chr12	53267964	53267963	rs139566759:53652332:C:T	53258548	53258548	0	3.2932e-10	1.82246	0.270635	-25568	Distal non-mGene
cg13445358	chr12	53267966	53267965	rs139566759:53652332:C:T	53258548	53258548	0	4.35531e-13	0.617645	0.0777743	-25568	Distal non-mGene
cg15977026	chr12	53268125	53268124	rs139566759:53652332:C:T	53258548	53258548	0	3.5807e-08	0.298895	0.0514284	-25568	Distal non-mGene
cg17230002	chr12	54295721	54295720	rs200018950:53882702:TAAAAAG:T	53488918	53488924	0	7.92199e-07	0.164816	0.0319782	-47177	Distal non-mGene
cg06632207	chr12	53677148	53677147	rs3809156:54070919:T:C	53677135	53677135	0	6.01525e-16	0.338571	0.0373089	-51156	Distal non-mGene
cg08816590	chr12	54560554	54560553	rs3825194:54954306:C:T	54560522	54560522	0	1.03822e-08	0.33918	0.055945	424224	Distal non-mGene
cg00660843	chr12	54560617	54560616	rs3782407:54954696:C:T	54560912	54560912	1	2.73672e-07	0.699052	0.129807	423834	Distal non-mGene
cg07681579	chr12	54560613	54560612	rs7953703:54958164:C:G	54564380	54564380	0	2.6043e-08	0.148453	0.0252602	420366	Distal non-mGene
cg11867842	chr12	54603071	54603070	rs71444860:54986617:A:AT	54592833	54592833	0	5.5487e-26	0.32646	0.025385	391913	Distal non-mGene
cg15961105	chr12	54976403	54976402	rs11833742:55355947:G:A	54962163	54962163	0	9.84887e-14	0.313294	0.0381979	-412813	Distal non-mGene
cg24320043	chr12	56222590	56222589	rs1274495:56616367:C:G	56222583	56222583	0	5.1922e-10	0.215468	0.0324134	-105997	Distal non-mGene
cg23139285	chr12	56233814	56233813	rs117779516:56750872:G:C	56357088	56357088	0	6.14602e-12	0.310627	0.0415858	111479	Distal non-mGene
cg26714650	chr12	56300496	56300495	rs117779516:56750872:G:C	56357088	56357088	0	1.0602e-25	-0.740047	0.0580196	111479	Distal non-mGene
cg26547506	chr12	56469255	56469254	rs138855722:56862720:C:G	56468936	56468936	0	4.49394e-07	-0.336056	0.0636689	-278652	Distal non-mGene
cg19636672	chr12	56487338	56487337	rs34325581:56869949:C:CT	56476165	56476165	0	7.04179e-13	0.167369	0.0213028	-116010	Distal non-mGene
cg03249590	chr12	56646416	56646415	rs7956952:57031090:G:C	56637306	56637306	0	2.94409e-08	0.617836	0.105578	-126304	Distal non-mGene
cg24269846	chr12	56752304	56752303	exm1014414	56752285	56752285	0	2.2662e-10	0.140908	0.0207076	233675	Distal non-mGene
cg21721432	chr12	57079002	57079001	rs73116494:57459209:C:T	57065426	57065426	0	1.27908e-08	0.161199	0.0267733	63067	Distal non-mGene
cg06600276	chr12	57176274	57176273	rs10876967:57570593:G:A	57176810	57176810	0	2.49483e-20	-0.378942	0.0352658	-44671	Distal non-mGene
cg10625931	chr12	57238635	57238634	rs7956686:57608433:G:A	57214650	57214650	0	7.55551e-14	-0.267264	0.0324036	26065	Distal mGene
cg16835618	chr12	57238924	57238923	rs7956686:57608433:G:A	57214650	57214650	0	2.01478e-10	-0.182668	0.0267575	26065	Distal mGene
cg02675634	chr12	57219391	57219390	rs7956686:57608433:G:A	57214650	57214650	0	1.32326e-22	0.658919	0.0568128	26065	Distal non-mGene
cg04093168	chr12	57219686	57219685	rs7956686:57608433:G:A	57214650	57214650	0	2.91894e-24	0.54119	0.0442982	26065	Distal non-mGene
cg10701104	chr12	57219711	57219710	rs7956686:57608433:G:A	57214650	57214650	0	2.16224e-27	0.786968	0.0587791	26065	Distal non-mGene
cg23853145	chr12	57219809	57219808	rs7956686:57608433:G:A	57214650	57214650	0	1.06907e-23	0.586094	0.0488153	26065	Distal non-mGene
cg09093210	chr12	57225417	57225416	rs7956686:57608433:G:A	57214650	57214650	0	1.5931e-22	-0.379161	0.0327769	26065	Distal non-mGene
cg12615879	chr12	57619390	57619389	rs2277324:58013175:G:A	57619392	57619392	0	3.48303e-32	0.485882	0.0319562	-69394	Distal non-mGene
cg17392605	chr12	57895277	57895276	rs140185971:58295270:G:A	57901487	57901487	0	3.56992e-14	0.278216	0.0332083	-54748	Distal non-mGene
cg08712270	chr12	62485994	62485993	rs12369961:62966584:C:T	62572804	62572804	0	1.8033e-09	0.15846	0.0247288	362233	Distal non-mGene
cg09658126	chr12	66130984	66130983	rs59922000:66499131:GAA:G	66105351	66105353	0	1.69959e-23	1.05454	0.0883851	-1221957	Distal non-mGene
cg23500718	chr12	67443408	67443407	rs7298082:67837114:T:C	67443334	67443334	0	2.21346e-14	0.373233	0.0441154	205004	Distal non-mGene
cg07430608	chr12	68329223	68329222	rs17105247:68714588:G:A	68320808	68320808	0	1.32948e-07	0.132223	0.0238713	425298	Distal non-mGene
cg23926526	chr12	68332831	68332830	rs10506559:68716067:A:C	68322287	68322287	0	6.42518e-16	0.298002	0.0328788	423819	Distal non-mGene
cg05098765	chr12	68333360	68333359	rs2046067:68726303:C:T	68332523	68332523	0	4.1945e-08	0.182112	0.0315106	278316	Distal non-mGene
cg14747866	chr12	68337200	68337199	rs4913436	68333077	68333077	0	2.28976e-07	0.194236	0.0358136	277762	Distal non-mGene
cg17330252	chr12	69415848	69415847	rs61927202:69811049:T:C	69417269	69417269	0	1.52514e-13	0.248438	0.0305747	53080	Distal non-mGene
cg14166992	chr12	69584968	69584967	rs547497:69967862:G:A	69574082	69574082	0	9.89874e-08	-0.132943	0.0237354	-214379	Distal non-mGene
cg20264568	chr12	70610593	70610592	rs7979665:71013102:A:G	70619322	70619322	0	5.35668e-08	0.290388	0.0506883	-794018	Distal non-mGene
cg19656689	chr12	70719750	70719749	rs7304603:71114400:T:C	70720620	70720620	0	1.46437e-15	0.192049	0.0215197	-895316	Distal non-mGene
cg11702299	chr12	83823774	83823773	rs10779047:84215204:A:C	83821425	83821425	0	1.51676e-31	-0.545835	0.0364858	-1134545	Distal non-mGene
cg16688899	chr12	89497576	89497575	rs184750986:89925533:G:A	89531756	89531756	0	1.42888e-11	-0.199174	0.0272225	-5732	Distal mGene
cg00757033	chr12	89526874	89526873	rs11105319:89927177:G:A	89533400	89533400	0	5.15582e-26	0.457722	0.0355587	-513721	Distal non-mGene
cg10233654	chr12	89350845	89350844	rs370715263:89929553:ATT:A	89535776	89535778	0	3.34862e-09	-0.178194	0.0283431	-508019	Distal non-mGene
cg03767333	chr12	89544226	89544225	rs4842664:89938030:G:A	89544253	89544253	0	3.08764e-07	0.154974	0.0289164	1410923	Distal non-mGene
cg00110688	chr12	93377528	93377527	rs17790482:93791233:A:G	93397457	93397457	0	1.58662e-10	0.235736	0.0343055	-468126	Distal non-mGene
cg00288933	chr12	94102217	94102216	rs6538481	94099107	94099107	0	1.4721e-07	0.0884949	0.016039	-631619	Distal non-mGene
cg02851245	chr12	96990441	96990440	rs11108757:97381151:T:A	96987373	96987373	0	2.48889e-12	0.167788	0.0219847	-497802	Distal non-mGene
cg04138066	chr12	99087570	99087569	rs7956330:99440595:G:A	99046817	99046817	0	1.40921e-11	0.188362	0.0257359	937837	Distal mGene
cg11311452	chr12	100741278	100741277	rs7136983:101134477:C:T	100740699	100740699	0	3.7823e-22	0.293657	0.0256975	-756045	Distal non-mGene
cg11081231	chr12	101946466	101946465	rs192043543:102226628:C:A	101832850	101832850	0	4.82718e-07	-0.430154	0.0817377	-1912	Promoter non-mGene
cg10604851	chr12	102950559	102950558	rs7303972:103347958:A:T	102954180	102954180	0	2.26153e-07	-0.10016	0.0184586	541830	Distal non-mGene
cg27569040	chr12	102958078	102958077	rs9782	102958048	102958048	0	7.13067e-14	-0.208003	0.025188	537962	Distal non-mGene
cg25935014	chr12	103495265	103495264	rs12422517:103889031:A:G	103495253	103495253	0	8.21841e-10	-0.127504	0.0194376	-537567	Distal non-mGene
cg02106157	chr12	103547670	103547669	rs11111629:103928570:C:G	103534792	103534792	0	3.27436e-09	-0.158501	0.0251932	-576382	Distal non-mGene
cg04922803	chr12	104050641	104050640	rs1165685:104333866:T:A	103940088	103940088	0	1.5201e-10	0.188147	0.0273482	124369	Distal non-mGene
cg20474755	chr12	104050658	104050657	rs1165685:104333866:T:A	103940088	103940088	0	1.5736e-09	0.170255	0.0264603	124369	Distal non-mGene
cg06743153	chr12	103800593	103800592	exm1031794	103993455	103993455	0	1.18802e-23	-1.68369	0.140433	71002	Distal non-mGene
ch.12.2061504F	chr12	104337278	104337277	rs111908683:104753911:GC:G	104360133	104360134	0	3.19501e-07	-0.173536	0.0324243	-144354	Distal mGene
cg24454553	chr12	104986394	104986393	rs138369713:105406802:T:TCTG	105013024	105013024	0	3.2515e-21	0.249253	0.0225007	-797245	Distal non-mGene
cg18170141	chr12	105106865	105106864	rs71468237:105454863:G:A	105061085	105061085	0	4.46779e-09	-0.154995	0.0248776	-845306	Distal non-mGene
cg18542804	chr12	105278463	105278462	rs71468237:105454863:G:A	105061085	105061085	0	2.25126e-10	-0.195378	0.0287071	-845306	Distal non-mGene
cg26690331	chr12	105071231	105071230	rs112558374:105461009:A:G	105067231	105067231	0	2.9793e-14	0.247701	0.0294562	-851452	Distal non-mGene
cg01650245	chr12	105233011	105233010	rs1196780:105627031:T:A	105233253	105233253	0	1.8676e-10	-0.199921	0.0292236	2985	Distal mGene
cg19229557	chr12	105233160	105233159	rs6144851:105629953:G:GCCCGCCGGCCCTCCTCCCGGCCCT	105236175	105236175	0	1.5156e-07	-0.112604	0.0204315	-128996	Distal non-mGene
cg03710564	chr12	105705863	105705862	rs10861479:106099565:C:T	105705787	105705787	0	6.16806e-09	0.173389	0.0281179	434246	Distal non-mGene
cg24577940	chr12	106075469	106075468	rs892269	106070532	106070532	0	2.99353e-07	-0.0990616	0.0184608	-366329	Distal non-mGene
cg01595262	chr12	106236935	106236934	12:106676869:G:C	106283091	106283091	0	1.16415e-07	-0.55376	0.0994721	21188	Distal non-mGene
cg02032070	chr12	106357529	106357528	rs73197542:106751270:T:C	106357492	106357492	0	2.25856e-08	0.155346	0.0263033	598005	Distal non-mGene
cg18257193	chr12	106305661	106305660	rs5800711:106807999:T:TAA	106414221	106414221	0	2.9122e-09	0.16274	0.0257728	496536	Distal non-mGene
cg25048751	chr12	106903408	106903407	rs112400508:107301279:G:A	106907501	106907501	0	1.92389e-08	-0.155277	0.0261475	-549843	Distal non-mGene
cg21744360	chr12	106903519	106903518	rs2072559:107307287:T:G	106913509	106913509	0	2.05594e-09	0.135182	0.0211804	-611580	Distal non-mGene
cg08130071	chr12	106954862	106954861	rs11405853:107314481:C:CT	106920703	106920703	0	3.82626e-13	0.247714	0.031103	-563045	Distal non-mGene
cg13071569	chr12	106903169	106903168	rs1838445:107314585:T:A	106920807	106920807	0	8.39568e-14	0.218549	0.0265563	-563149	Distal non-mGene
cg14573817	chr12	106954912	106954911	rs4964505:107341840:T:G	106948062	106948062	0	8.93005e-08	0.190095	0.0338091	-590404	Distal non-mGene
cg21935516	chr12	106987928	106987927	rs2287161:107381140:C:G	106987362	106987362	0	2.54738e-18	0.415894	0.0416476	105936	Distal non-mGene
cg03459784	chr12	107094372	107094371	rs11344276:107423384:CA:C	107029606	107029607	0	2.32631e-08	0.163686	0.0277436	64223	Distal mGene
cg19047049	chr12	107094417	107094416	rs10746080:107443546:T:C	107049768	107049768	0	5.22202e-08	0.148835	0.0259557	44061	Distal mGene
cg06205108	chr12	107094436	107094435	rs10746083:107454152:T:C	107060374	107060374	0	1.47967e-11	0.160983	0.0220219	33455	Distal mGene
cg15761917	chr12	107608368	107608367	rs35099280:107995996:A:G	107602219	107602219	0	8.09522e-08	-0.158531	0.0280928	-508921	Distal non-mGene
cg25345738	chr12	107685059	107685058	rs4964607	107679918	107679918	0	8.02198e-20	-0.42642	0.0404024	201324	Distal non-mGene
cg15550141	chr12	107761141	107761140	rs11113469:108160452:C:T	107766675	107766675	0	7.43609e-07	0.12723	0.024619	114567	Distal non-mGene
cg15090469	chr12	107914740	107914739	rs10161315:108279886:A:T	107886109	107886109	0	1.89315e-09	0.133495	0.0208636	-200377	Distal non-mGene
cg20407365	chr12	108559764	108559763	rs36065481:108934417:CA:C	108540641	108540642	0	1.14593e-09	0.182686	0.0281242	20759	Distal mGene
cg15395166	chr12	108535513	108535512	rs888549:108962398:C:G	108568622	108568622	0	2.2468e-34	-0.837657	0.0521921	454467	Distal non-mGene
cg27462219	chr12	108667023	108667022	rs7295054:109119601:T:A	108725825	108725825	0	1.85022e-12	0.201575	0.0262295	297264	Distal non-mGene
cg24160574	chr12	108715589	108715588	rs10746131:109184349:T:C	108790573	108790573	0	2.19431e-09	0.123219	0.0193446	232516	Distal non-mGene
cg10667794	chr12	108702034	108702033	rs4964759	108810035	108810035	0	1.09159e-06	0.110296	0.0216993	-78439	Distal mGene
cg03529000	chr12	109280503	109280502	rs3742023:109693982:C:T	109256177	109256177	0	5.67364e-07	0.127246	0.0243424	91726	Distal non-mGene
cg26222258	chr12	109393971	109393970	rs73192513:109827640:G:T	109389835	109389835	0	5.15697e-18	0.555878	0.0563232	-278617	Distal non-mGene
cg27263151	chr12	109575936	109575935	rs7308864:109871179:A:G	109433374	109433374	0	1.0744e-08	0.111929	0.0184828	447114	Distal non-mGene
cg14859365	chr12	109541467	109541466	rs12831657:109979267:T:C	109541462	109541462	1	2.26554e-11	0.986252	0.136367	-64060	Distal non-mGene
cg14859365	chr12	109541467	109541466	rs67520670:109995763:G:A	109557958	109557958	0	4.61833e-13	-1.62297	0.204632	275443	Distal non-mGene
cg07719172	chr12	109451627	109451626	rs61940468:110000394:C:T	109562589	109562589	0	1.22015e-09	-0.237541	0.0366374	151639	Distal non-mGene
cg20424400	chr12	109588933	109588932	12:110010216:ATTTTTTTTTTT:A	109572411	109572422	0	1.55911e-08	-0.261437	0.0437111	844	Promoter mGene
cg23364246	chr12	109588983	109588982	12:110010216:ATTTTTTTTTTT:A	109572411	109572422	0	6.56454e-08	-0.28617	0.0503221	844	Promoter mGene
cg05360138	chr12	109597939	109597938	rs34118891:110050249:T:TA	109612444	109612444	0	4.40651e-21	0.394212	0.0357462	101784	Distal non-mGene
cg19586024	chr12	109742829	109742828	rs735465:110136274:C:G	109698469	109698469	0	6.41755e-07	-0.122521	0.0235602	-125214	Distal non-mGene
cg07382437	chr12	109760350	109760349	rs735465:110136274:C:G	109698469	109698469	0	2.10495e-09	-0.174008	0.0272834	-125214	Distal non-mGene
cg18593915	chr12	109714782	109714781	rs825002:110147526:C:G	109709721	109709721	0	1.10332e-18	0.208918	0.020636	-136466	Distal non-mGene
cg25900312	chr12	109766431	109766430	rs824999:110152606:G:C	109714801	109714801	0	1.62136e-07	-0.141199	0.0256864	-573	Promoter non-mGene
cg17711345	chr12	110029257	110029256	rs112276518:110196747:G:A	109758942	109758942	0	4.39278e-18	-2.16096	0.218367	-185687	Distal non-mGene
cg01818063	chr12	109820412	109820411	rs11068375:110241683:G:A	109803878	109803878	0	4.06895e-07	-0.136861	0.0258242	-326476	Distal non-mGene
cg05155784	chr12	109879185	109879184	rs4766636:110284149:G:T	109846344	109846344	0	1.14557e-07	0.112346	0.0201684	-368942	Distal non-mGene
cg01252219	chr12	109864301	109864300	rs7955379:110301945:G:T	109864140	109864140	0	4.54795e-07	0.109163	0.0206922	-386738	Distal non-mGene
cg07267832	chr12	109899099	109899098	rs10128780:110323951:C:T	109886146	109886146	0	3.48047e-09	0.289378	0.0460834	-538243	Distal non-mGene
cg05788368	chr12	110068334	110068333	rs199987382:110851809:A:AAT	110414004	110414004	0	5.23136e-14	-1.54889	0.186349	-340318	Distal mGene
cg20940052	chr12	110958606	110958605	rs57606492:111382452:CA:C	110944648	110944649	0	1.01567e-07	0.134928	0.024113	89376	Distal non-mGene
cg23070153	chr12	111170845	111170844	rs114336707:111862098:C:G	111424294	111424294	0	5.79715e-08	-0.515804	0.0902932	-18346	Distal non-mGene
cg14760880	chr12	111402989	111402988	rs11065898:111862575:C:T	111424771	111424771	0	1.91215e-14	0.20129	0.0237214	-18823	Distal non-mGene
cg20594304	chr12	111403154	111403153	rs11065898:111862575:C:T	111424771	111424771	0	2.33665e-15	0.406403	0.0459471	-18823	Distal non-mGene
cg07939214	chr12	111434924	111434923	rs12371484:111872722:T:C	111434918	111434918	0	1.23824e-07	-0.320856	0.0577703	-28970	Distal mGene
cg26649504	chr12	111758594	111758593	rs10554669:112190645:GA:G	111752841	111752842	0	2.00409e-06	0.153263	0.0309843	14046	Distal non-mGene
cg03101570	chr12	112564481	112564480	rs112665078:112508793:C:T	112070989	112070989	0	6.10021e-07	-0.315732	0.060584	38033	Distal non-mGene
cg11972180	chr12	111842962	111842961	rs112039348:112551370:A:AAGG	112113566	112113566	0	2.1914e-28	0.312221	0.0226865	-100381	Distal non-mGene
cg25567085	chr12	112538995	112538994	rs60348583:112656238:C:A	112218434	112218434	0	5.28265e-09	-0.31266	0.0504519	164005	Distal non-mGene
cg05149586	chr12	113422065	113422064	rs12815112	113412576	113412576	0	9.57453e-25	-1.07402	0.0866293	553795	Distal non-mGene
cg18072814	chr12	113422262	113422261	rs12815112	113412576	113412576	0	3.90335e-28	-1.16778	0.085439	553795	Distal non-mGene
cg24070137	chr12	113422369	113422368	rs12815112	113412576	113412576	0	7.19781e-32	-0.970872	0.0643647	553795	Distal non-mGene
cg02234008	chr12	113422451	113422450	rs12815112	113412576	113412576	0	1.79316e-21	-0.888976	0.0795543	553795	Distal non-mGene
cg16604086	chr12	113422639	113422638	rs12815112	113412576	113412576	0	8.08524e-27	-0.56839	0.043146	553795	Distal non-mGene
cg13813191	chr12	113426088	113426087	rs12815112	113412576	113412576	0	1.13042e-24	0.579303	0.0468279	553795	Distal non-mGene
cg24488248	chr12	113426345	113426344	rs12815112	113412576	113412576	0	2.65982e-13	0.353227	0.0439982	553795	Distal non-mGene
cg00777702	chr12	113426373	113426372	rs12815112	113412576	113412576	0	7.5202e-22	0.568388	0.0502296	553795	Distal non-mGene
cg09324706	chr12	113957653	113957652	rs4767173:114395442:C:T	113957637	113957637	0	3.51132e-21	-0.241976	0.0218685	-772158	Distal non-mGene
cg14738806	chr12	114664909	114664908	rs35383422:115092018:A:T	114654213	114654213	0	2.1099e-11	0.214613	0.0296208	1101049	Distal non-mGene
cg07211768	chr12	114664486	114664485	rs11609105:115102482:A:C	114664677	114664677	0	1.73865e-11	0.418032	0.0574163	975057	Distal non-mGene
cg26620530	chr12	114664922	114664921	rs12422933:115106688:C:A	114668883	114668883	0	1.31951e-07	0.107878	0.0194706	970851	Distal non-mGene
cg11078221	chr12	114698130	114698129	rs12810764:115129176:T:C	114691371	114691371	0	5.11215e-08	-0.0917053	0.0159805	1063891	Distal non-mGene
cg19175386	chr12	114696692	114696691	rs2279801:115134529:C:A	114696724	114696724	0	1.20085e-09	0.352538	0.0543482	1058538	Distal non-mGene
cg02022284	chr12	115624108	115624107	rs1991318:116061313:A:T	115623508	115623508	0	6.58025e-18	-0.218258	0.0222053	-3053128	Distal non-mGene
cg17480137	chr12	115764385	115764384	rs200400080:116202060:GTTT:G	115764255	115764258	0	4.83754e-08	0.164032	0.0285275	-1106193	Distal non-mGene
cg13622788	chr12	115794687	115794686	rs1715580:116236207:A:C	115798402	115798402	0	1.23545e-07	0.138231	0.0248865	-1140340	Distal non-mGene
cg10205974	chr12	116027658	116027657	rs11067918:116569379:T:C	116131574	116131574	0	3.86942e-15	0.372913	0.0425739	145764	Distal mGene
cg17153306	chr12	115953468	115953467	rs56317424:116621614:T:G	116183809	116183809	0	2.40362e-07	-0.250629	0.0463	93529	Distal non-mGene
cg17143945	chr12	116916827	116916826	rs10744885:117352557:G:A	116914752	116914752	0	6.5527e-18	-0.548682	0.0558184	-176574	Distal non-mGene
cg17765387	chr12	116917020	116917019	rs7484620:117353716:G:A	116915911	116915911	0	7.5262e-19	-0.428161	0.0420303	-254329	Distal non-mGene
cg07954572	chr12	117046717	117046716	rs10641949:117456411:A:AGCTT	117018606	117018606	0	7.685e-08	-0.127883	0.0226183	80875	Distal non-mGene
cg02556042	chr12	117033282	117033281	rs60940473:117462582:C:T	117024777	117024777	0	8.93676e-10	-0.272897	0.0417047	74704	Distal non-mGene
cg26376280	chr12	117155455	117155454	rs10655877:117597115:G:GAA	117159310	117159310	0	3.06134e-09	-0.148313	0.0235244	31221	Distal mGene
cg21441555	chr12	117141528	117141527	rs34160051:117621060:C:CT	117183255	117183255	0	9.72726e-10	0.174842	0.0267864	7276	Distal non-mGene
cg24037916	chr12	118062635	118062634	rs12830847:118477785:G:T	118039980	118039980	0	7.03394e-07	-0.264099	0.0509825	-70997	Distal non-mGene
cg11127587	chr12	118056454	118056453	rs55973710:118479518:G:A	118041713	118041713	0	2.91389e-07	-0.155983	0.0290371	-72730	Distal non-mGene
cg19746591	chr12	118151283	118151282	rs1622210:118586700:A:G	118148895	118148895	0	1.70032e-21	0.251033	0.0224475	224050	Distal mGene
cg00991379	chr12	118161137	118161136	rs1622210:118586700:A:G	118148895	118148895	0	1.47517e-28	-0.626407	0.0453027	224050	Distal mGene
cg27295716	chr12	118104265	118104264	rs34888508:118640616:G:A	118202811	118202811	0	1.26711e-08	0.174317	0.028943	170134	Distal non-mGene
cg02628790	chr12	118161189	118161188	rs1699160:118756336:C:A	118318531	118318531	0	3.67614e-09	-0.186195	0.0297024	54414	Distal mGene
cg27106959	chr12	119037047	119037046	rs10775010:119425898:T:C	118988093	118988093	0	6.0872e-07	0.117459	0.0225365	-6598	Distal mGene
cg12689803	chr12	119082144	119082143	rs60407065:119516574:A:T	119078769	119078769	0	3.11631e-10	-0.216468	0.0320955	-97274	Distal mGene
cg09831535	chr12	119116356	119116355	rs4767786:119559617:T:A	119121812	119121812	0	4.61634e-10	0.41804	0.0626756	-140317	Distal mGene
cg01409571	chr12	119020760	119020759	rs74762382:119606916:T:C	119169111	119169111	0	1.14588e-06	-0.187561	0.0369788	165601	Distal non-mGene
cg01059913	chr12	119595351	119595350	rs2393548:120017106:C:T	119579301	119579301	0	1.56097e-07	-0.133604	0.0242693	-2127131	Distal non-mGene
cg16126580	chr12	119667910	119667909	rs2393550	119660203	119660203	0	3.20542e-18	0.324194	0.0325886	217088	Distal non-mGene
cg07164667	chr12	119752233	119752232	rs2936830:120167155:C:T	119729350	119729350	0	4.35949e-15	-0.162408	0.0185845	147941	Distal mGene
cg06049002	chr12	120115953	120115952	rs113566038:120543715:C:T	120105911	120105911	0	2.10787e-32	0.943625	0.0617222	-116042	Distal non-mGene
cg11826475	chr12	120266204	120266203	rs147625061:120674929:C:CGT	120237126	120237126	0	1.05313e-07	-0.10266	0.0183714	28645	Distal mGene
cg15569123	chr12	120254305	120254304	rs56102477:120685493:C:T	120247690	120247690	0	1.21786e-07	0.302312	0.0543972	18081	Distal mGene
cg17644227	chr12	120377681	120377680	rs76019166:120690511:C:G	120252708	120252708	0	6.71985e-07	0.235935	0.0454574	13063	Distal non-mGene
cg17403084	chr12	120266232	120266231	rs112863429:120703715:G:C	120265912	120265912	0	1.1837e-11	-0.170483	0.0231925	-141	Promoter mGene
cg20153322	chr12	120266175	120266174	rs3956833:120705828:A:C	120268025	120268025	0	9.45507e-07	-0.110878	0.0216775	-2254	Promoter mGene
cg16500101	chr12	120317526	120317525	rs3847968:120730869:G:A	120293066	120293066	0	1.30169e-07	0.187554	0.0338335	-27295	Distal non-mGene
cg25066643	chr12	120291984	120291983	rs78033146:120730889:AG:A	120293086	120293087	0	4.19846e-19	0.628491	0.0611198	-27315	Distal non-mGene
cg15611176	chr12	120326067	120326066	rs2070873:120763440:C:A	120325637	120325637	0	1.13719e-16	0.393134	0.0420253	112453	Distal non-mGene
cg02239282	chr12	120328347	120328346	rs1179450:120801856:T:C	120364053	120364053	0	8.11791e-08	-0.11578	0.0205192	25493	Distal non-mGene
cg26872792	chr12	120326013	120326012	rs2283367:120802968:C:A	120365165	120365165	0	3.01438e-23	0.607477	0.0513151	24381	Distal non-mGene
cg01341572	chr12	120978710	120978709	rs1151842:120836085:G:A	120398282	120398282	0	6.44772e-07	0.269707	0.0518735	-29102	Distal non-mGene
cg01363902	chr12	120584637	120584636	rs370286288:120861115:CCT:C	120423312	120423314	0	2.03559e-09	0.109799	0.0171982	-54132	Distal non-mGene
cg27489772	chr12	120583688	120583687	rs113278902:120881590:CA:C	120443787	120443788	0	8.82154e-23	-0.424278	0.0363753	-141471	Distal non-mGene
cg27279351	chr12	120496850	120496849	rs35467904:120892378:A:AT	120454575	120454575	0	5.05353e-13	0.165759	0.0209416	-126786	Distal non-mGene
cg06734168	chr12	120467235	120467234	rs73221368:120893430:G:C	120455627	120455627	0	6.65037e-14	-0.44552	0.053871	-153311	Distal non-mGene
cg05954233	chr12	120468360	120468359	rs680795:120906034:C:G	120468231	120468231	0	5.32146e-11	0.183556	0.0259438	1619	Promoter non-mGene
cg01236616	chr12	120581541	120581540	rs12857:120933946:T:G	120496143	120496143	0	2.47482e-42	0.903549	0.0469743	-26350	Distal non-mGene
cg10600917	chr12	120725687	120725686	rs148974387:120995686:C:T	120557883	120557883	0	2.78209e-07	0.482286	0.0896144	481359	Distal non-mGene
cg12219531	chr12	120529087	120529086	rs509445:121017243:A:C	120579440	120579440	0	1.09445e-10	0.149714	0.021569	130995	Distal non-mGene
cg24622544	chr12	120583871	120583870	rs588132:121024066:A:G	120586263	120586263	0	2.56324e-07	0.164949	0.0305496	100606	Distal non-mGene
cg12934901	chr12	120641664	120641663	rs4767920:121065277:G:A	120627474	120627474	0	4.83983e-10	0.240132	0.0360511	353491	Distal non-mGene
cg17118599	chr12	120641680	120641679	rs5801399:121065488:TA:T	120627685	120627686	0	3.42666e-12	0.208818	0.0275676	353280	Distal non-mGene
cg14661400	chr12	120649558	120649557	rs7955217:121076966:C:G	120639163	120639163	0	1.989e-09	0.204164	0.0319563	71272	Distal non-mGene
cg08575696	chr12	120649580	120649579	rs2686553:121077389:A:C	120639586	120639586	0	6.67463e-09	0.196411	0.0319323	70849	Distal non-mGene
cg18477009	chr12	120649975	120649974	rs553328:121081295:A:G	120643492	120643492	0	6.10476e-18	0.387055	0.0393288	66943	Distal non-mGene
cg24179646	chr12	120649553	120649552	rs503667:121088750:A:G	120650947	120650947	0	8.09935e-11	0.246421	0.0352169	-10395	Distal mGene
cg24292016	chr12	120649887	120649886	rs503667:121088750:A:G	120650947	120650947	0	2.8329e-11	0.209077	0.0290735	-10395	Distal mGene
cg07871717	chr12	120830232	120830231	rs3213567:121222556:T:C	120784753	120784753	0	1.74622e-19	0.295476	0.0283378	-23161	Distal non-mGene
cg02419362	chr12	120766146	120766145	rs904628:121342084:G:A	120904281	120904281	0	2.22346e-18	0.413357	0.0413007	90	Promoter mGene
cg18971251	chr12	120925938	120925937	rs11347907:121398372:GA:G	120960569	120960570	0	4.66836e-08	-0.173336	0.030107	-366021	Distal non-mGene
cg10197866	chr12	120962411	120962410	rs11065374:121400205:T:C	120962402	120962402	0	5.29178e-16	-0.269577	0.0296356	-367854	Distal non-mGene
cg02403541	chr12	121016486	121016485	rs2264778:121450354:C:A	121012551	121012551	0	2.4911e-21	0.165923	0.0149199	-431153	Distal non-mGene
cg07318344	chr12	121039234	121039233	rs2254971:121450384:G:C	121012581	121012581	0	7.77652e-07	0.134992	0.0261709	-431183	Distal non-mGene
cg11320725	chr12	121039849	121039848	rs2254971:121450384:G:C	121012581	121012581	0	8.97918e-08	0.160781	0.0286012	-431183	Distal non-mGene
cg15155738	chr12	121016533	121016532	rs1169279:121455873:C:T	121018070	121018070	0	3.35312e-19	0.203905	0.0197585	-548220	Distal non-mGene
cg19958059	chr12	121260578	121260577	rs11835572:121711469:G:C	121273666	121273666	0	1.84814e-16	-0.654685	0.0705988	307349	Distal non-mGene
cg14504499	chr12	121295623	121295622	rs143064498:121779701:A:T	121341898	121341898	0	3.36149e-08	-0.438258	0.0752397	58143	Distal non-mGene
cg21580016	chr12	121449590	121449589	rs10849888:121892786:A:G	121454983	121454983	0	1.64014e-08	-0.115224	0.019298	-55087	Distal non-mGene
cg26995224	chr12	121536242	121536241	rs4980994:121919295:G:A	121481492	121481492	0	5.37008e-08	-0.275208	0.0480427	99523	Distal mGene
cg04844574	chr12	121590690	121590689	rs28421662:122013999:G:C	121576094	121576094	0	1.64628e-08	0.279051	0.046742	4921	Distal non-mGene
cg01774878	chr12	121625101	121625100	rs57157561:122025657:CA:C	121587752	121587753	0	9.20458e-08	0.147023	0.0261781	17150	Distal non-mGene
cg03651613	chr12	121712609	121712608	rs2942379:122153130:C:A	121715224	121715224	0	7.67355e-28	0.626744	0.0462283	-2472	Promoter mGene
cg26392922	chr12	121794915	121794914	rs712852:122233495:G:C	121795589	121795589	0	4.03698e-18	-0.395681	0.0399277	8591	Distal non-mGene
cg03141007	chr12	121812613	121812612	rs1168663:122234089:T:A	121796183	121796183	0	1.95205e-08	0.141267	0.0238001	7997	Distal mGene
cg17967483	chr12	122078052	122078051	rs28643366:122499101:C:T	122061195	122061195	0	4.8486e-12	-0.173527	0.023099	17527	Distal mGene
cg25461186	chr12	122080184	122080183	12:122599305:T:TTG	122114758	122114758	0	1.90393e-08	0.162006	0.0272709	-95336	Distal non-mGene
cg14078092	chr12	122978984	122978983	rs34776887:122603392:C:CA	122118845	122118845	0	3.65554e-07	-0.136283	0.0256029	-99423	Distal non-mGene
cg27349244	chr12	122127372	122127371	rs141853208:122619224:C:CT	122134677	122134677	0	2.69745e-15	-0.213627	0.024219	-245946	Distal non-mGene
cg26218692	chr12	122059921	122059920	rs1043763:122630909:G:A	122146362	122146362	0	4.11315e-12	0.208331	0.0276231	21376	Distal non-mGene
cg05707623	chr12	122500498	122500497	rs10846978:122964708:T:C	122480161	122480161	0	7.60584e-10	0.109045	0.0165861	-57529	Distal non-mGene
cg07969078	chr12	122500542	122500541	rs10846978:122964708:T:C	122480161	122480161	0	7.14894e-12	0.143011	0.0192162	-57529	Distal non-mGene
cg23029597	chr12	122524948	122524947	rs7309390:123110422:A:G	122625875	122625875	0	2.6572e-18	-0.348702	0.0349435	123711	Distal non-mGene
cg21167157	chr12	122841915	122841914	rs4759393	122797985	122797985	0	1.79606e-09	0.261846	0.040858	36468	Distal mGene
cg25930673	chr12	122835348	122835347	rs5801491:123343572:G:GGC	122859025	122859025	0	5.46721e-08	-0.315248	0.0550683	122624	Distal non-mGene
cg02203224	chr12	122979541	122979540	exm2271879	122963381	122963381	0	2.14809e-11	-0.223053	0.0307997	-128928	Distal non-mGene
cg04180275	chr12	122979626	122979625	exm2271879	122963381	122963381	0	1.36568e-26	-0.265575	0.020291	-128928	Distal non-mGene
cg07644039	chr12	122979604	122979603	rs61955196:123451018:G:C	122966471	122966471	0	7.8846e-20	-0.179823	0.0170332	-70027	Distal non-mGene
cg02390806	chr12	122980015	122980014	rs61955196:123451018:G:C	122966471	122966471	0	2.71842e-18	-0.292169	0.0292893	-70027	Distal non-mGene
cg14409041	chr12	122980058	122980057	rs11608811:123529056:A:G	123044509	123044509	0	4.45623e-12	-0.468154	0.0621924	105506	Distal non-mGene
cg21745287	chr12	122979965	122979964	rs59131741:123536456:C:CT	123051909	123051909	0	2.05388e-20	-0.282844	0.026245	98106	Distal non-mGene
cg16697799	chr12	122980109	122980108	rs59131741:123536456:C:CT	123051909	123051909	0	6.45733e-12	-0.202755	0.0271766	98106	Distal non-mGene
cg01492050	chr12	122976084	122976083	rs146637945:123598258:A:AC	123113711	123113711	0	3.97038e-12	-0.242492	0.0321255	36304	Distal non-mGene
cg01030110	chr12	123043881	123043880	rs7975763:123604053:C:T	123119506	123119506	0	1.05947e-13	0.180299	0.0220168	30509	Distal mGene
cg05968312	chr12	123437311	123437310	rs1790122:123606739:G:A	123122192	123122192	0	7.6679e-09	0.145878	0.0238236	27823	Distal non-mGene
cg26705986	chr12	122980021	122980020	rs1626703:123710835:A:C	123226288	123226288	0	8.09161e-10	-0.225485	0.0343589	-244639	Distal non-mGene
cg10169515	chr12	123222990	123222989	rs35389455:123727782:A:ATT	123243235	123243235	0	3.63762e-07	0.283707	0.0532882	-261586	Distal non-mGene
cg00585698	chr12	123266318	123266317	rs10846491:123753492:C:G	123268945	123268945	0	3.67187e-10	-0.141488	0.0210755	315586	Distal non-mGene
cg26804387	chr12	123273460	123273459	rs140153724:123847315:CAAA:C	123362768	123362771	0	1.70165e-10	0.372981	0.054382	21005	Distal non-mGene
cg00347921	chr12	123613044	123613043	rs36002329:124070612:A:C	123586065	123586065	0	1.67258e-13	-0.31957	0.0394071	-353149	Distal non-mGene
cg07670188	chr12	123582314	123582313	rs11342180:124072734:GT:G	123588187	123588188	0	7.03269e-11	-0.287682	0.0409601	-355271	Distal non-mGene
cg00581918	chr12	123037973	123037972	rs10744156:124093602:A:G	123609055	123609055	0	5.51269e-09	-0.45903	0.0741715	-1081809	Distal non-mGene
cg21767912	chr12	123585421	123585420	rs11615300:124100423:A:G	123615876	123615876	0	9.84e-12	0.196861	0.0266592	-382960	Distal non-mGene
cg13209683	chr12	123620883	123620882	rs1050448:124105925:G:A	123621378	123621378	0	1.89172e-08	0.119376	0.0200905	-19301	Distal mGene
cg06735598	chr12	123711602	123711601	rs4930708:124145697:T:C	123661150	123661150	0	2.42189e-13	-0.276561	0.0343782	9963	Distal non-mGene
cg07842649	chr12	123949342	123949341	rs80270210:124447397:G:T	123962850	123962850	0	3.77588e-08	-0.128943	0.0222277	-200662	Distal non-mGene
cg19781462	chr12	124259716	124259715	rs12301479:124743910:C:T	124259364	124259364	0	5.17561e-22	0.50552	0.0444354	-286123	Distal non-mGene
cg04052996	chr12	124389133	124389132	rs1244050:124862697:G:A	124378151	124378151	0	8.20687e-07	0.598565	0.116312	189438	Distal mGene
cg09644157	chr12	124411667	124411666	rs4394929:124923177:C:T	124438631	124438631	0	1.55303e-08	0.143832	0.024045	128958	Distal mGene
cg08034663	chr12	124408966	124408965	rs1147286:124948235:G:A	124463689	124463689	0	2.76286e-07	0.191054	0.0354902	103900	Distal mGene
cg15199476	chr12	124408980	124408979	rs1147286:124948235:G:A	124463689	124463689	0	8.3661e-08	0.178887	0.0317387	103900	Distal mGene
cg06881647	chr12	124409011	124409010	rs1147286:124948235:G:A	124463689	124463689	0	1.20574e-07	0.191094	0.0343719	103900	Distal mGene
cg06204938	chr12	124521165	124521164	rs12822442:125005712:C:G	124521166	124521166	0	4.63796e-13	-0.21502	0.0271133	46423	Distal mGene
cg17543324	chr12	124545687	124545686	rs837480	124545246	124545246	0	1.57937e-07	-0.142149	0.0258332	22343	Distal mGene
cg16757384	chr12	124545605	124545604	rs11057666:125030170:A:G	124545624	124545624	0	3.15008e-09	0.161444	0.0256301	21965	Distal non-mGene
cg00522213	chr12	124833994	124833993	rs4765621	124836169	124836169	0	8.1601e-18	-0.204547	0.0208861	46499	Distal mGene
cg02155927	chr12	124927954	124927953	rs11057911:125411587:T:C	124927041	124927041	0	5.74977e-28	0.357815	0.0263008	-9673	Distal non-mGene
cg19893132	chr12	124940664	124940663	rs61179054:125425192:T:C	124940646	124940646	0	4.64147e-26	-0.467617	0.0362793	-23278	Distal non-mGene
cg21673010	chr12	124940973	124940972	rs61179054:125425192:T:C	124940646	124940646	0	3.33772e-13	-0.253174	0.0316929	-23278	Distal non-mGene
cg05364487	chr12	125174480	125174479	rs34375054:125665896:A:T	125181350	125181350	0	3.63977e-17	-0.262935	0.027547	5486	Distal non-mGene
cg06554081	chr12	126069734	126069733	rs34788304:126554381:TAGA:T	126069835	126069838	0	4.64024e-12	-0.178807	0.0237768	804855	Distal non-mGene
cg00840412	chr12	126874654	126874653	rs7970012:127359192:T:C	126874646	126874646	0	4.07767e-22	0.246863	0.0216256	-1687810	Distal non-mGene
cg05828701	chr12	126874672	126874671	rs55678355:127359841:A:G	126875295	126875295	0	1.05229e-11	0.112034	0.0151968	-1688459	Distal non-mGene
cg18628094	chr12	128266504	128266503	rs7295398:128739350:T:A	128254805	128254805	0	9.19882e-08	-0.146466	0.0260782	12598	Distal mGene
cg23521905	chr12	128814146	128814145	rs4760537:129301299:C:A	128816754	128816754	0	1.89226e-13	0.266312	0.0329272	-3827632	Distal non-mGene
cg05253716	chr12	128814788	128814787	rs4760537:129301299:C:A	128816754	128816754	0	5.59552e-08	0.181702	0.0317667	-3827632	Distal non-mGene
cg20567785	chr12	128971952	128971951	rs112763478:129452881:G:T	128968336	128968336	0	2.9947e-07	0.143323	0.0267096	935330	Distal non-mGene
cg11737941	chr12	129966233	129966232	rs2669595:130441667:T:G	129957122	129957122	1	3.58865e-13	0.913256	0.114506	-1689719	Distal non-mGene
cg01909242	chr12	130013831	130013830	rs1696432	130012431	130012431	0	2.07357e-18	0.306705	0.0306093	-1159004	Distal non-mGene
cg26491818	chr12	130477405	130477404	rs884256:130961977:A:G	130477432	130477432	0	2.26287e-09	-0.198739	0.03123	238849	Distal non-mGene
cg13074908	chr12	130641305	130641304	rs11061051:131129365:A:G	130644820	130644820	0	1.07497e-12	0.219897	0.0282581	-126903	Distal non-mGene
cg10958265	chr12	130662067	130662066	rs9795534:131149763:C:G	130665218	130665218	0	7.73495e-14	-0.200773	0.0243541	-147301	Distal non-mGene
cg15942717	chr12	130669264	130669263	rs60876022:131152746:T:A	130668201	130668201	0	2.88987e-15	0.65825	0.0747256	-150284	Distal non-mGene
cg05181941	chr12	130686487	130686486	rs4759754:131179602:C:T	130695057	130695057	0	9.09767e-15	0.319592	0.0371052	-177140	Distal non-mGene
cg05375686	chr12	130686637	130686636	rs11309202:131187060:CA:C	130702515	130702516	0	2.49302e-09	-0.181365	0.0285848	-184598	Distal non-mGene
cg00514489	chr12	130706312	130706311	rs7295428:131197817:A:C	130713272	130713272	0	7.62886e-08	-0.161827	0.0286142	-195355	Distal non-mGene
cg26798879	chr12	130761924	130761923	rs11314765:131267265:GC:G	130782720	130782721	0	8.61281e-13	-0.592655	0.0757772	56546	Distal non-mGene
cg13315047	chr12	130776599	130776598	rs10744478:131267557:G:A	130783012	130783012	0	3.35945e-08	0.135357	0.0232375	56254	Distal non-mGene
cg14622770	chr12	130783021	130783020	rs10744478:131267557:G:A	130783012	130783012	0	6.01117e-16	0.229776	0.0253199	56254	Distal non-mGene
cg21470120	chr12	130776247	130776246	rs140925706:131268018:G:GGGGCTT	130783473	130783473	0	5.29222e-14	0.383545	0.0461559	55793	Distal non-mGene
cg12736692	chr12	130776679	130776678	rs12311965:131268403:C:T	130783858	130783858	0	2.54067e-15	0.338478	0.0383293	55408	Distal non-mGene
cg01666255	chr12	130812640	130812639	rs10744481:131277271:G:A	130792726	130792726	0	4.98648e-30	-0.414622	0.0288271	-16180	Distal non-mGene
cg23269985	chr12	130815598	130815597	rs10773819:131279022:G:A	130794477	130794477	0	5.84734e-41	-1.24023	0.0664289	-17931	Distal non-mGene
cg22307022	chr12	130815689	130815688	rs10773819:131279022:G:A	130794477	130794477	0	2.4792e-35	-0.667235	0.0406295	-17931	Distal non-mGene
cg07816006	chr12	130916761	130916760	rs7133973:131400707:G:A	130916162	130916162	0	6.3647e-14	-0.291357	0.0351976	37745	Distal non-mGene
cg10021924	chr12	130916731	130916730	rs5801940:131401317:GC:G	130916772	130916773	0	8.75058e-17	1.39003	0.147899	37135	Distal non-mGene
cg10021924	chr12	130916731	130916730	rs73164837:131401344:G:A	130916799	130916799	1	1.36663e-07	0.661642	0.119577	37108	Distal non-mGene
cg25237400	chr12	131770788	131770787	rs1195896:131507425:A:G	131022880	131022880	0	6.73925e-07	-0.174748	0.0336726	-68973	Distal non-mGene
cg09150807	chr12	131084220	131084219	rs113748144:131582714:C:T	131098169	131098169	0	3.47286e-08	-0.140173	0.0240924	730224	Distal non-mGene
cg06581300	chr12	131121926	131121925	rs1725788:131608476:A:G	131123931	131123931	0	8.62458e-08	0.230892	0.0410119	-170024	Distal mGene
cg13899096	chr12	131120676	131120675	rs1725789	131124981	131124981	0	9.18113e-15	0.309061	0.035889	-171074	Distal mGene
cg22663463	chr12	131121786	131121785	rs1725789	131124981	131124981	0	2.3579e-15	0.490015	0.0554097	-171074	Distal mGene
cg03153539	chr12	131124081	131124080	rs1725789	131124981	131124981	0	7.93078e-25	0.585476	0.0471079	-171074	Distal mGene
cg06374807	chr12	131122313	131122312	rs1725789	131124981	131124981	0	1.43737e-08	0.378431	0.0630992	-171074	Distal non-mGene
cg21344159	chr12	131124772	131124771	rs1725789	131124981	131124981	0	2.61456e-12	0.452719	0.0593867	-171074	Distal non-mGene
cg17405139	chr12	131116543	131116542	rs28972274:131612225:A:G	131127680	131127680	0	7.72183e-08	-0.170826	0.0302188	-173773	Distal non-mGene
cg23903129	chr12	131132542	131132541	rs112643563:131617074:C:CG	131132529	131132529	0	1.63173e-12	0.218485	0.0283472	-178622	Distal non-mGene
cg20402051	chr12	131608066	131608065	rs7961927:132092790:G:C	131608245	131608245	0	2.15996e-19	0.296864	0.0285664	341675	Distal non-mGene
cg03570417	chr12	131827917	131827916	rs6598161:132312488:C:A	131827943	131827943	0	8.42199e-18	0.283194	0.0289322	-874036	Distal non-mGene
cg13553528	chr12	131827562	131827561	rs68145657:132316336:G:C	131831791	131831791	0	8.4296e-17	0.280261	0.0297998	-877884	Distal non-mGene
cg15010296	chr12	131900654	131900653	rs4964882:132381696:C:T	131897151	131897151	0	6.25005e-22	-0.640527	0.0564547	32049	Distal non-mGene
cg21523613	chr12	131892880	131892879	rs4964923:132388500:C:T	131903955	131903955	0	5.93786e-12	0.175314	0.023451	-9304	Distal non-mGene
cg13382100	chr12	131930305	131930304	rs9481:132407089:A:G	131922544	131922544	0	2.40871e-09	-0.203361	0.0320178	-27893	Distal non-mGene
cg19981660	chr12	131949622	131949621	rs74614974:132453606:G:A	131969061	131969061	0	1.36211e-16	-0.202105	0.0216747	-1062223	Distal non-mGene
cg05134918	chr12	132118987	132118986	rs57948063:132568726:GC:G	132084181	132084182	0	7.1141e-13	-0.295925	0.037674	-134261	Distal non-mGene
cg00012529	chr12	132320312	132320311	rs28610201:132892596:G:A	132316010	132316010	0	3.90241e-08	0.202257	0.0349067	13339	Distal mGene
cg18540816	chr12	132319753	132319752	rs28635760:132894458:T:C	132317872	132317872	0	7.00635e-10	0.0951421	0.0144368	11477	Distal mGene
cg07775468	chr12	132423708	132423707	rs28519466:132994790:C:T	132418204	132418204	0	1.54837e-12	-0.172653	0.0223737	38956	Distal non-mGene
cg06118523	chr12	132413860	132413859	rs201408207:132997009:A:AT	132420423	132420423	0	3.93466e-07	-0.23891	0.0450177	69128	Distal non-mGene
cg09889154	chr12	132413991	132413990	rs77634752:132999910:C:A	132423324	132423324	0	1.10792e-08	-0.116447	0.0192484	66227	Distal non-mGene
cg09013480	chr12	132433169	132433168	rs28623640:133001004:T:C	132424418	132424418	0	1.56878e-09	0.117358	0.0182376	65133	Distal non-mGene
cg07813695	chr12	132405831	132405830	rs148439987:133006315:G:A	132429729	132429729	0	5.82671e-07	0.246803	0.0472666	27431	Distal non-mGene
cg26937277	chr12	132426809	132426808	rs4432090:133011935:C:T	132435349	132435349	0	4.88686e-11	0.213739	0.0301427	54202	Distal non-mGene
cg02521854	chr12	132430473	132430472	rs4432090:133011935:C:T	132435349	132435349	0	2.25912e-11	0.288026	0.039822	54202	Distal non-mGene
cg20109840	chr12	132442453	132442452	rs11147289:133013145:T:G	132436559	132436559	0	9.5564e-12	0.133432	0.0180566	52992	Distal non-mGene
cg14192259	chr12	132438296	132438295	rs7132450:133014718:A:G	132438132	132438132	0	1.07439e-07	-0.132382	0.023708	51419	Distal non-mGene
cg27523351	chr12	132456684	132456683	exm-rs10747083	132465032	132465032	0	6.51715e-10	0.129375	0.0195901	-39824	Distal non-mGene
cg01843264	chr12	132459431	132459430	rs11147102:133046199:G:A	132469613	132469613	0	3.21116e-08	0.36899	0.0632461	-44405	Distal non-mGene
cg18143359	chr12	132466979	132466978	rs11147102:133046199:G:A	132469613	132469613	0	4.8046e-08	0.142638	0.0248006	-44405	Distal non-mGene
cg12522758	chr12	132661103	132661102	rs141970815:133066123:G:C	132489537	132489537	0	1.35048e-07	-0.202142	0.0365162	-64329	Distal non-mGene
cg11084474	chr12	132431090	132431089	rs11147230:133072460:G:C	132495874	132495874	1	3.65534e-07	-0.624767	0.117372	-70666	Distal non-mGene
cg07116732	chr12	132547357	132547356	rs7398953:133101355:C:T	132524769	132524769	0	1.46796e-07	-0.176557	0.0319962	-35218	Distal mGene
cg23460285	chr12	132500102	132500101	rs59196714:133133141:ACCC:A	132556555	132556558	0	3.27957e-09	0.153885	0.0244607	-131347	Distal non-mGene
cg05053403	chr12	132544091	132544090	rs7973990:133137480:G:C	132560894	132560894	0	5.77306e-08	-0.282925	0.0495194	-476611	Distal non-mGene
cg19771626	chr12	132550458	132550457	rs144448559:133140442:A:C	132563856	132563856	0	4.49632e-08	-0.137198	0.0237983	-479573	Distal non-mGene
cg09805252	chr12	132610867	132610866	rs7137282:133187746:G:C	132611160	132611160	0	1.33333e-13	-0.193013	0.0236853	-466712	Distal non-mGene
cg18833933	chr12	132609030	132609029	rs73481439:133192895:T:A	132616309	132616309	0	9.52776e-10	-0.32225	0.0493397	-471861	Distal non-mGene
cg02726803	chr12	132619688	132619687	rs6560889	132618549	132618549	0	3.06211e-07	-0.160102	0.0298633	-474101	Distal non-mGene
cg01803747	chr12	132618583	132618582	12:133195182:TCCCCGCGAGG:T	132618596	132618606	0	7.5775e-08	0.369371	0.0652957	-474148	Distal non-mGene
cg26317209	chr12	132610551	132610550	rs6560890:133195311:A:C	132618725	132618725	0	5.81295e-12	-0.312535	0.041785	-474277	Distal non-mGene
cg27362255	chr12	132718847	132718846	12:133304182:G:A	132727596	132727596	0	2.39853e-08	0.131255	0.0222703	34292	Distal non-mGene
cg16878027	chr12	132758883	132758882	rs61951308:133332212:T:C	132755626	132755626	1	1.79506e-07	-1.20124	0.219387	6262	Distal mGene
cg13614819	chr12	132802277	132802276	rs1009320	132784378	132784378	0	1.44933e-13	0.266808	0.0327996	44480	Distal mGene
cg03538318	chr12	132835219	132835218	rs55706161:133382637:G:A	132806051	132806051	0	1.12029e-14	0.425642	0.0496233	150253	Distal non-mGene
cg12581980	chr12	132806071	132806070	rs61952772:133398342:G:A	132821756	132821756	0	6.77817e-07	0.242524	0.0467439	134548	Distal non-mGene
cg14949892	chr12	132851724	132851723	rs74721187:133398421:A:C	132821835	132821835	0	2.5042e-10	0.341644	0.0503468	134469	Distal mGene
cg07776804	chr12	132828905	132828904	rs7298097:133398451:A:C	132821865	132821865	0	1.18492e-13	0.157612	0.0192924	134439	Distal non-mGene
cg06119275	chr12	132808151	132808150	rs10781656:133407523:A:G	132830937	132830937	0	5.76795e-07	-0.231509	0.0443187	-2079	Promoter mGene
cg07052262	chr12	132822403	132822402	rs10781656:133407523:A:G	132830937	132830937	0	2.11055e-19	-0.45465	0.0437338	-2079	Promoter mGene
cg16214937	chr12	132822568	132822567	rs10781656:133407523:A:G	132830937	132830937	0	1.20811e-12	-0.336556	0.0433653	-2079	Promoter mGene
cg05237360	chr12	132784119	132784118	rs146419925:133407649:C:CA	132831063	132831063	0	1.03865e-06	0.164489	0.0322907	-2205	Promoter mGene
cg15108326	chr12	132804869	132804868	rs146419925:133407649:C:CA	132831063	132831063	0	1.4519e-09	0.303862	0.0471108	-2205	Promoter mGene
cg14903202	chr12	132816530	132816529	rs146419925:133407649:C:CA	132831063	132831063	0	6.28474e-12	0.316748	0.0424281	-2205	Promoter mGene
cg22844555	chr12	132817028	132817027	rs146419925:133407649:C:CA	132831063	132831063	0	8.96226e-15	0.325738	0.0378076	-2205	Promoter mGene
cg13046214	chr12	132825323	132825322	rs146419925:133407649:C:CA	132831063	132831063	0	9.76743e-21	0.763893	0.0700926	-2205	Promoter mGene
cg16120883	chr12	132826511	132826510	rs146419925:133407649:C:CA	132831063	132831063	0	4.57523e-17	0.587959	0.0618459	-2205	Promoter mGene
cg20765580	chr12	132826630	132826629	rs146419925:133407649:C:CA	132831063	132831063	0	4.41782e-19	0.455073	0.0442912	-2205	Promoter mGene
cg23058246	chr12	132807305	132807304	rs61952781:133412428:A:G	132835842	132835842	0	1.1677e-25	0.684978	0.0537683	-6984	Distal mGene
cg05614952	chr12	132807980	132807979	rs61952781:133412428:A:G	132835842	132835842	0	1.98291e-27	0.788759	0.0588508	-6984	Distal mGene
cg19837214	chr12	132825966	132825965	rs61952781:133412428:A:G	132835842	132835842	0	5.43113e-17	0.316463	0.0333884	-6984	Distal mGene
cg03425615	chr12	132833072	132833071	rs61952781:133412428:A:G	132835842	132835842	0	2.14279e-25	0.67297	0.0532377	-6984	Distal non-mGene
cg08424446	chr12	132804789	132804788	rs72624274:133414251:C:T	132837665	132837665	0	4.93796e-14	0.475185	0.0571014	-8807	Distal mGene
cg23470262	chr12	132806628	132806627	rs72624274:133414251:C:T	132837665	132837665	0	4.20475e-26	0.562773	0.0436075	-8807	Distal mGene
cg10388270	chr12	132806722	132806721	rs72624274:133414251:C:T	132837665	132837665	0	1.22806e-29	0.745465	0.0523691	-8807	Distal mGene
cg16020270	chr12	132822535	132822534	rs72624274:133414251:C:T	132837665	132837665	0	3.54764e-28	0.53326	0.0389707	-8807	Distal mGene
cg09537870	chr12	132823514	132823513	rs72624274:133414251:C:T	132837665	132837665	0	1.78198e-32	0.671405	0.0438361	-8807	Distal mGene
cg02243221	chr12	132824290	132824289	rs72624274:133414251:C:T	132837665	132837665	0	8.84165e-29	0.673161	0.0483907	-8807	Distal mGene
cg08695912	chr12	132825189	132825188	rs72624274:133414251:C:T	132837665	132837665	0	1.79584e-22	0.565952	0.0490066	-8807	Distal mGene
cg05625100	chr12	132833152	132833151	rs72624274:133414251:C:T	132837665	132837665	1	1.90981e-09	0.834205	0.130411	-8807	Distal non-mGene
cg22149555	chr12	132834295	132834294	rs72624274:133414251:C:T	132837665	132837665	0	1.05094e-28	0.590215	0.0425146	-8807	Distal non-mGene
cg23149010	chr12	132801800	132801799	rs11147139:133457651:G:A	132881065	132881065	0	4.81114e-08	0.182946	0.0318107	75239	Distal non-mGene
cg14168939	chr12	132840739	132840738	rs11147140:133458154:C:G	132881568	132881568	0	7.42418e-11	-0.274422	0.0391281	74736	Distal mGene
cg18066197	chr12	132841300	132841299	rs3741494:133464500:C:T	132887914	132887914	0	1.6959e-07	-0.228925	0.0417177	-59056	Distal non-mGene
cg09904296	chr12	132829462	132829461	rs28372675:133464669:G:A	132888083	132888083	0	8.86253e-11	-0.184566	0.0264402	-59225	Distal mGene
cg10340916	chr12	133080731	133080730	rs905226:133683261:T:C	133106675	133106675	0	2.46869e-14	0.174563	0.0206789	23798	Distal non-mGene
cg04665696	chr12	133040258	133040257	rs905224:133684321:G:T	133107735	133107735	0	2.69985e-12	0.422354	0.0554453	22738	Distal non-mGene
cg05609879	chr12	133080120	133080119	12:133694532:CTTT:C	133117946	133117949	0	7.21164e-08	0.0932601	0.0164561	-38108	Distal mGene
cg00221394	chr12	133130938	133130937	rs113751729:133760700:CT:C	133184114	133184115	0	4.49388e-07	-0.249284	0.0472291	-227810	Distal non-mGene
cg27499820	chr13	20722163	20722162	rs1888001:21285906:C:G	20711767	20711767	0	5.85964e-11	0.162145	0.0229755	191281	Distal non-mGene
cg27234864	chr13	20721803	20721802	rs6783	20722911	20722911	0	8.47441e-11	-0.212926	0.0304667	180137	Distal non-mGene
cg06710890	chr13	20903727	20903726	rs7326480:21476997:A:G	20902858	20902858	0	2.3332e-07	0.212046	0.0391265	-377001	Distal non-mGene
cg20503156	chr13	20938435	20938434	rs3858747:21517888:C:A	20943749	20943749	0	1.91855e-33	0.98984	0.0630919	540425	Distal non-mGene
cg24407833	chr13	23465953	23465952	rs2065564:24040298:C:T	23466159	23466159	0	7.62208e-09	0.145379	0.0237376	422730	Distal non-mGene
cg25639084	chr13	23559375	23559374	rs11451799:24153565:A:AC	23579426	23579426	0	2.27726e-08	-0.153464	0.025992	309993	Distal non-mGene
cg25643223	chr13	24213058	24213057	rs17364874:24787005:G:A	24212867	24212867	0	2.6678e-07	0.10033	0.0186114	-233167	Distal non-mGene
cg11009066	chr13	25017937	25017936	rs4359295:25592399:C:G	25018261	25018261	0	1.21099e-15	0.14748	0.0164662	1135914	Distal non-mGene
cg04838225	chr13	26054400	26054399	rs1324865:26628506:G:T	26054368	26054368	0	9.19016e-07	-0.251001	0.0490125	-682297	Distal non-mGene
cg01194519	chr13	26186657	26186656	rs11620064:26757984:C:T	26183847	26183847	0	8.78745e-16	-0.291283	0.0323261	373856	Distal non-mGene
cg02305431	chr13	26336087	26336086	rs3834505:26798726:T:TA	26224589	26224589	0	1.0358e-11	0.159888	0.0216796	29515	Distal mGene
cg17440241	chr13	26619465	26619464	rs12867025:27188777:A:G	26614640	26614640	0	1.13167e-17	-0.26158	0.0268584	-384996	Distal non-mGene
cg06573146	chr13	26629403	26629402	rs9507753:27224036:G:A	26649899	26649899	0	1.29912e-13	-0.243717	0.0298907	-427406	Distal non-mGene
cg00834519	chr13	26629424	26629423	rs1888546:27225682:C:A	26651545	26651545	1	6.36862e-07	-0.587344	0.112907	-429052	Distal non-mGene
cg14558712	chr13	26629090	26629089	rs61944464:27268711:G:C	26694574	26694574	0	1.19876e-16	-0.23677	0.0253341	-472081	Distal non-mGene
cg00834519	chr13	26629424	26629423	rs61944464:27268711:G:C	26694574	26694574	0	3.55321e-17	-1.07044	0.1121	-472081	Distal non-mGene
cg01501399	chr13	26983075	26983074	rs35669887:27553691:C:A	26979554	26979554	0	1.77942e-07	0.219148	0.0400105	393794	Distal non-mGene
cg04072570	chr13	27006718	27006717	rs80284164:27578449:C:T	27004312	27004312	0	4.49897e-09	-0.236324	0.0379398	339434	Distal non-mGene
cg24415799	chr13	27006834	27006833	rs80284164:27578449:C:T	27004312	27004312	0	6.89434e-12	-0.369101	0.0495518	339434	Distal non-mGene
cg18190225	chr13	27373150	27373149	rs9507882:27936633:G:C	27362496	27362496	0	1.77686e-07	-0.0985884	0.0179985	-370500	Distal non-mGene
cg05269298	chr13	27373214	27373213	rs7336886:27949457:G:T	27375320	27375320	0	1.75787e-12	-0.159288	0.0207024	-383324	Distal non-mGene
cg10407646	chr13	27383760	27383759	rs7334449	27383775	27383775	0	2.47476e-10	0.125423	0.018477	537629	Distal non-mGene
cg13557709	chr13	27425410	27425409	rs1049302:27998769:T:C	27424632	27424632	0	1.06829e-13	-0.260007	0.0317557	25959	Distal non-mGene
cg11655627	chr13	27425330	27425329	rs7998978:27999457:T:C	27425320	27425320	0	4.19193e-20	1.35927	0.127506	25271	Distal non-mGene
cg17847428	chr13	27618889	27618888	rs8002709	27578597	27578597	0	3.22643e-14	-0.381155	0.0454005	41807	Distal mGene
cg03956053	chr13	27977388	27977387	rs9581955:28549534:A:T	27975397	27975397	0	5.81018e-10	-0.390106	0.0588747	-602049	Distal non-mGene
cg23444418	chr13	27973481	27973480	rs4769585:28550578:C:T	27976441	27976441	0	6.78125e-07	-0.0872153	0.0168102	-603093	Distal non-mGene
cg10719522	chr13	27988705	27988704	rs7319145:28557390:A:G	27983253	27983253	0	9.00312e-08	0.150925	0.0268507	-991257	Distal non-mGene
cg25591794	chr13	27980706	27980705	rs34136875:28559211:T:C	27985074	27985074	0	1.66728e-14	-0.275638	0.0323931	-993078	Distal non-mGene
cg24321030	chr13	28718752	28718751	rs66964313:29294042:G:C	28719905	28719905	0	2.62454e-07	0.108845	0.0201778	-60801	Distal non-mGene
cg02897018	chr13	28796438	28796437	rs199742335:29393884:A:AGCTGGG	28819747	28819747	0	3.01315e-08	0.136821	0.0233993	601	Promoter non-mGene
cg19209977	chr13	29362929	29362928	rs7319027:29937465:A:G	29363328	29363328	0	2.57238e-26	-0.269239	0.0207341	-542980	Distal mGene
cg11283819	chr13	30115392	30115391	rs9508638:30689562:T:C	30115425	30115425	0	1.61245e-07	-0.152714	0.0277754	-1295077	Distal non-mGene
cg08631887	chr13	30118445	30118444	rs1409506	30129807	30129807	0	3.82509e-07	-0.240577	0.0452797	487790	Distal non-mGene
cg04788993	chr13	31225923	31225922	rs1005824:31816016:G:A	31241879	31241879	0	3.61826e-16	0.254383	0.0277697	178110	Distal non-mGene
cg20237547	chr13	33676786	33676785	rs1304604:34125284:A:G	33551147	33551147	0	2.91834e-10	0.89579	0.132574	-964720	Distal non-mGene
cg13115502	chr13	33728908	33728907	rs9528024:34306319:T:C	33732182	33732182	0	5.08195e-07	0.133582	0.0254375	-381552	Distal non-mGene
cg01406247	chr13	34037138	34037137	rs11336624:34629866:TA:T	34055729	34055730	0	1.0649e-08	-0.192825	0.0318316	886558	Distal non-mGene
cg08520986	chr13	35519007	35519006	rs7332116	35504290	35504290	0	1.7605e-12	-0.307114	0.0399165	-562003	Distal mGene
cg21100351	chr13	35696670	35696669	rs2182061:36271089:C:A	35696952	35696952	0	4.62941e-11	0.205182	0.0288953	-754665	Distal non-mGene
cg12329484	chr13	35697476	35697475	rs955477	35697733	35697733	0	4.38738e-14	0.120411	0.0144339	-755446	Distal non-mGene
cg12140530	chr13	35697665	35697664	rs955477	35697733	35697733	0	2.02652e-31	0.398076	0.0266948	-755446	Distal non-mGene
cg16041090	chr13	35697773	35697772	rs955477	35697733	35697733	0	4.51069e-22	0.421419	0.0369703	-755446	Distal non-mGene
cg21746263	chr13	35988184	35988183	rs139849818:36577441:CGT:C	36003304	36003306	0	7.84453e-09	0.143153	0.023396	294538	Distal non-mGene
cg11583802	chr13	36342777	36342776	rs9547082:36863861:T:A	36289724	36289724	0	3.38985e-11	0.154883	0.0216367	-158418	Distal non-mGene
cg25321781	chr13	39655717	39655716	rs56374624:40225103:TA:T	39650966	39650967	0	4.54891e-11	-0.0815223	0.0114753	-612660	Distal non-mGene
cg21288729	chr13	40665016	40665015	rs966968:41248037:T:C	40673900	40673900	0	2.37691e-16	0.206795	0.022402	-1018273	Distal non-mGene
cg22829304	chr13	41193997	41193996	rs2039134:41767338:A:G	41193202	41193202	0	9.12883e-18	0.359359	0.0367637	-71326	Distal non-mGene
cg00509187	chr13	43787958	43787957	rs12427698:44373886:G:A	43799750	43799750	0	8.88676e-10	0.270396	0.0413156	-1237014	Distal non-mGene
cg27222172	chr13	43880060	43880059	rs9533684:44468177:C:T	43894041	43894041	0	3.7156e-10	0.279218	0.0416051	683106	Distal non-mGene
cg12936674	chr13	44191764	44191763	rs76582315:44759768:C:G	44185632	44185632	0	1.58885e-07	-0.301028	0.0547194	391515	Distal non-mGene
cg10246903	chr13	44648575	44648574	rs9533887:45093359:T:C	44519223	44519223	0	1.03655e-09	0.201454	0.0309215	470260	Distal non-mGene
cg17015467	chr13	45311222	45311221	rs61949216:45847206:G:A	45273071	45273071	0	1.27308e-07	0.194534	0.0350629	-189946	Distal non-mGene
cg24593688	chr13	45311465	45311464	rs61148455:45850574:C:CT	45276439	45276439	0	1.57046e-08	-0.687246	0.114933	-193314	Distal non-mGene
cg24593688	chr13	45311465	45311464	rs148302184:45882721:C:T	45308586	45308586	1	5.96422e-07	1.19695	0.229458	-731439	Distal non-mGene
cg13040693	chr13	45311968	45311967	rs9526057:45886458:G:A	45312323	45312323	0	7.19143e-08	0.228376	0.0402937	-229198	Distal non-mGene
cg00191181	chr13	46575925	46575924	rs1326110:47116420:T:G	46542285	46542285	0	9.32917e-16	0.552742	0.0614113	10883	Distal mGene
cg06650250	chr13	46622924	46622923	rs1326110:47116420:T:G	46542285	46542285	0	5.36873e-10	0.444262	0.0668955	10883	Distal mGene
cg17920789	chr13	46578391	46578390	rs28489097:47134230:A:T	46560095	46560095	0	5.33437e-16	0.443632	0.0487774	-6927	Distal mGene
cg08005604	chr13	46554753	46554752	rs28489097:47134230:A:T	46560095	46560095	0	2.39287e-14	0.745893	0.0883032	-6927	Distal mGene
cg11342437	chr13	46552194	46552193	rs7337999:47143284:C:T	46569149	46569149	0	3.78457e-11	-0.151924	0.0212836	-15981	Distal mGene
cg19833103	chr13	46552417	46552416	rs7337999:47143284:C:T	46569149	46569149	0	1.65339e-11	-0.161897	0.0222084	-15981	Distal mGene
cg06473578	chr13	46556580	46556579	rs56737022:47150859:CTG:C	46576724	46576726	0	1.54785e-12	-0.210227	0.0272425	-23556	Distal mGene
cg20338956	chr13	48162003	48162002	rs7317675:49336677:A:G	48762541	48762541	0	4.86596e-07	-0.337686	0.0641882	-1865465	Distal non-mGene
cg17654199	chr13	49540231	49540230	rs4572288:50175936:T:C	49601800	49601800	0	5.24816e-07	-0.194933	0.0371699	-353875	Distal non-mGene
cg12814984	chr13	49679310	49679309	rs6561551:50258449:A:G	49684313	49684313	0	2.88015e-11	-0.177994	0.0247616	108608	Distal non-mGene
cg18886427	chr13	49691667	49691666	rs7319887:50265225:C:T	49691089	49691089	0	1.02487e-30	0.482635	0.0329579	101832	Distal non-mGene
cg03658251	chr13	49691715	49691714	rs7983905:50266544:A:G	49692408	49692408	0	2.48918e-22	0.362647	0.031547	100513	Distal non-mGene
cg04663916	chr13	49691856	49691855	rs7983905:50266544:A:G	49692408	49692408	0	4.01688e-23	0.476419	0.0404033	100513	Distal non-mGene
cg20399252	chr13	49692092	49692091	rs7983905:50266544:A:G	49692408	49692408	0	5.0049e-10	0.266117	0.0399905	100513	Distal non-mGene
cg21251659	chr13	51815590	51815589	rs143283314:52389806:AC:A	51815670	51815671	0	4.03801e-08	0.293942	0.0507919	313408	Distal non-mGene
cg14716311	chr13	52026896	52026895	rs1886538:52569963:T:C	51995827	51995827	0	7.32361e-09	0.138262	0.0225461	133064	Distal non-mGene
cg02071074	chr13	52011148	52011147	rs73184330:52571856:G:C	51997720	51997720	0	2.5769e-14	0.193685	0.0229642	131171	Distal non-mGene
cg08705697	chr13	67230613	67230612	rs1570892:67803436:A:C	67229304	67229304	0	4.6743e-26	0.292163	0.022669	1141	Promoter mGene
cg24352054	chr13	67226774	67226773	rs56865872:67804735:T:TG	67230603	67230603	0	2.7787e-07	-0.11237	0.0208787	-4909298	Distal non-mGene
cg04873147	chr13	73060232	73060231	rs7139790:73328533:T:G	72754395	72754395	0	9.39897e-09	-0.207714	0.0341487	27701	Distal non-mGene
cg20524889	chr13	73075698	73075697	rs9543151:73443763:T:A	72869625	72869625	0	8.2895e-07	-0.11514	0.0223834	1125431	Distal non-mGene
cg21527346	chr13	77478871	77478870	rs647978:78069069:C:T	77494934	77494934	0	1.72985e-09	-0.169996	0.0264957	202920	Distal non-mGene
cg19985477	chr13	78138067	78138066	rs9544710:78710041:G:A	78135906	78135906	0	1.43365e-30	-0.285271	0.0195544	1270571	Distal non-mGene
cg25884883	chr13	79810535	79810534	rs9545192:80344751:C:T	79770616	79770616	0	6.46738e-07	-0.106255	0.0204389	598918	Distal non-mGene
cg03749355	chr13	93224968	93224967	rs17702471:93877117:A:G	93224864	93224864	0	9.99292e-12	-0.417205	0.05652	1978	Promoter non-mGene
cg03705036	chr13	93224913	93224912	rs319522:93879087:G:A	93226834	93226834	0	4.96953e-07	0.166878	0.0317484	8	Promoter non-mGene
cg17351439	chr13	93235815	93235814	rs5805796:93888101:G:GC	93235848	93235848	0	2.4822e-18	-0.342461	0.0342794	-9006	Distal mGene
cg03342032	chr13	94073242	94073241	rs685049:94806953:A:T	94154699	94154699	0	1.73342e-13	0.78324	0.0966579	-927857	Distal mGene
cg18412871	chr13	94601798	94601797	rs9301981:95250102:G:A	94597848	94597848	0	2.99891e-23	0.336362	0.0284113	-1371006	Distal non-mGene
cg11661263	chr13	94601647	94601646	rs3897473:95253920:T:G	94601666	94601666	0	2.16152e-11	0.201631	0.0278461	-121984	Distal non-mGene
cg24341515	chr13	97232126	97232125	rs34389698:97884347:CGAA:C	97232093	97232096	0	1.90103e-08	-0.0931107	0.0156728	-10659	Distal mGene
cg06784689	chr13	97338858	97338857	rs9584549:97975600:T:G	97323346	97323346	0	4.1476e-08	-0.133996	0.023176	-101912	Distal mGene
cg06929724	chr13	97338869	97338868	rs9584549:97975600:T:G	97323346	97323346	0	4.41345e-09	-0.0960484	0.0154104	-101912	Distal mGene
cg21420351	chr13	97339637	97339636	rs11349752:98008676:AT:A	97356422	97356423	0	1.44415e-10	-0.166468	0.0241633	-134988	Distal mGene
cg03175285	chr13	98142496	98142495	rs200336825:98805667:TATA:T	98153413	98153416	0	3.67111e-22	0.286024	0.0250188	-10851	Distal mGene
cg13474559	chr13	98142511	98142510	rs200336825:98805667:TATA:T	98153413	98153416	0	3.32309e-12	0.307251	0.0405332	-10851	Distal mGene
cg22223119	chr13	98443431	98443430	rs7992042:99095674:A:G	98443420	98443420	0	7.58512e-18	-0.696412	0.0710222	-300858	Distal mGene
cg05527456	chr13	98478693	98478692	rs79605847:99150402:T:C	98498148	98498148	0	1.64804e-31	1.30948	0.0876118	79792	Distal mGene
cg27038179	chr13	98478714	98478713	rs79605847:99150402:T:C	98498148	98498148	0	2.21157e-30	1.31341	0.0904735	79792	Distal mGene
cg15490075	chr13	99498726	99498725	rs34548643:100150907:GC:G	99498653	99498654	0	9.84142e-20	0.242178	0.0230188	108016	Distal non-mGene
cg19598875	chr13	100673939	100673938	rs9518129:101325335:G:C	100673081	100673081	0	1.86338e-09	0.209698	0.0327575	7578159	Distal non-mGene
cg27500125	chr13	101474444	101474443	rs1591450:102126768:G:T	101474417	101474417	0	2.93682e-07	-0.181584	0.0338135	7121735	Distal non-mGene
cg10199767	chr13	102457669	102457668	rs3916921:103106536:C:T	102454186	102454186	0	1.51908e-12	0.16846	0.0218207	-51729	Distal non-mGene
cg02197918	chr13	102596856	102596855	rs7995964:103249221:A:G	102596871	102596871	0	2.25172e-12	0.124073	0.0162188	202178	Distal non-mGene
cg15831447	chr13	102597857	102597856	rs12430252:103250220:G:A	102597870	102597870	0	1.71358e-09	0.0874511	0.0136263	201179	Distal non-mGene
cg13057891	chr13	102846062	102846061	rs34761412:103493063:C:CT	102840713	102840713	0	4.95744e-09	0.0899846	0.0144908	-250900	Distal non-mGene
cg11017186	chr13	102913976	102913975	rs75295662:103570031:T:A	102917681	102917681	0	4.29898e-09	-0.256087	0.0410535	3617433	Distal non-mGene
cg00794549	chr13	103007083	103007082	rs9634534:103628633:T:G	102976283	102976283	0	4.44911e-21	0.366475	0.0332358	4890452	Distal non-mGene
cg01715763	chr13	103351354	103351353	rs1330778:103999645:A:G	103347295	103347295	0	5.34731e-10	0.169425	0.0255086	6958517	Distal non-mGene
cg04715525	chr13	106568308	106568307	rs9558789	106573382	106573382	0	5.01686e-14	0.234568	0.0281965	-5898289	Distal non-mGene
cg06534061	chr13	106568316	106568315	rs9558789	106573382	106573382	0	7.3007e-22	0.238461	0.0210644	-5898289	Distal non-mGene
cg08055508	chr13	106867188	106867187	rs9520222	106863899	106863899	0	6.47958e-13	-0.194429	0.0247006	-3797053	Distal non-mGene
cg20343827	chr13	107217422	107217421	rs9634562	107217318	107217318	0	2.02189e-17	-0.200118	0.0207531	653065	Distal non-mGene
cg07154771	chr13	107373748	107373747	rs4444189	107373320	107373320	0	2.12645e-21	0.269658	0.0241917	493415	Distal mGene
cg22302985	chr13	107868598	107868597	rs9559179:108520925:C:G	107868577	107868577	0	8.21011e-13	0.252367	0.0322329	-1842	Promoter mGene
cg26630437	chr13	108779176	108779175	rs9521026:109423089:G:A	108770741	108770741	0	1.42204e-11	0.157935	0.0215836	-7318148	Distal non-mGene
cg22196764	chr13	109688346	109688345	rs2076914	109688669	109688669	0	5.61198e-15	-0.246851	0.0283875	-8980344	Distal non-mGene
cg09460553	chr13	109869610	109869609	rs12583851:110504964:T:C	109852617	109852617	0	4.14778e-13	0.275907	0.0347049	-9177524	Distal non-mGene
cg02315096	chr13	109869674	109869673	rs12583851:110504964:T:C	109852617	109852617	0	4.17981e-10	0.23892	0.0357195	-9177524	Distal non-mGene
cg22721998	chr13	109869803	109869802	rs12583851:110504964:T:C	109852617	109852617	0	4.40116e-08	0.195201	0.0338334	-9177524	Distal non-mGene
cg18865445	chr13	109869919	109869918	rs12583851:110504964:T:C	109852617	109852617	0	1.15203e-09	0.280212	0.043145	-9177524	Distal non-mGene
cg17797229	chr13	109869951	109869950	rs12583851:110504964:T:C	109852617	109852617	0	2.31763e-11	0.325276	0.0450012	-9177524	Distal non-mGene
cg15099397	chr13	110109231	110109230	rs9521593:110730712:C:T	110078365	110078365	0	1.64274e-09	0.191256	0.0297628	-7675908	Distal non-mGene
cg09162834	chr13	110116337	110116336	rs2218471:110777939:C:G	110125592	110125592	0	4.49746e-08	-0.115653	0.0200612	-1529440	Distal non-mGene
cg06068379	chr13	110157757	110157756	rs9521625:110810478:C:T	110158131	110158131	0	1.43457e-08	-0.17737	0.0295725	-10069116	Distal non-mGene
cg16327027	chr13	110412372	110412371	rs61963207:111061159:T:C	110408812	110408812	0	9.80651e-08	-0.113089	0.0201836	-101663	Distal non-mGene
cg14208976	chr13	110909960	110909959	rs116355942:111547103:T:A	110894756	110894756	0	9.49149e-09	0.133549	0.0219629	-8492299	Distal non-mGene
cg01313259	chr13	111240448	111240447	rs9515381:111831913:T:C	111179566	111179566	0	1.46353e-11	0.185857	0.0254175	-8420496	Distal non-mGene
cg26112799	chr13	111241125	111241124	rs7982732:111880815:G:A	111228468	111228468	0	3.81269e-15	0.193633	0.0220999	-8826011	Distal non-mGene
cg17070064	chr13	111900368	111900367	rs2295981:112554669:G:A	111900355	111900355	0	2.44739e-14	-0.175339	0.0207673	-9303352	Distal non-mGene
cg11216536	chr13	112637379	112637378	rs1925887:113293501:C:T	112639187	112639187	0	9.32166e-12	-0.110525	0.0149476	51142	Distal non-mGene
cg17608113	chr13	112640688	112640687	rs9550180:113294971:A:G	112640657	112640657	0	1.97634e-07	-0.149971	0.0274928	49672	Distal non-mGene
cg08183074	chr13	112642056	112642055	rs9550182:113296344:T:C	112642030	112642030	0	3.97537e-08	0.115593	0.0199628	48299	Distal non-mGene
cg17218041	chr13	112711006	112711005	rs282606	112685447	112685447	0	7.71674e-19	0.245157	0.0240754	-9886398	Distal non-mGene
cg27607408	chr13	113992869	113992868	rs192016049:114761285:T:C	113995809	113995809	0	3.53279e-09	-0.140379	0.0223657	-6129074	Distal non-mGene
cg24064173	chr13	113995735	113995734	rs192016049:114761285:T:C	113995809	113995809	0	8.8788e-27	-0.351217	0.0266914	-6129074	Distal non-mGene
cg16962442	chr13	114062981	114062980	rs76416736:114764620:A:G	113999144	113999144	0	1.88997e-18	-0.187701	0.0187042	-6132409	Distal non-mGene
cg24241305	chr13	114060601	114060600	rs188946619:114765417:T:C	113999941	113999941	0	8.08695e-07	-0.098355	0.0191001	-6133206	Distal non-mGene
cg19228781	chr13	114212319	114212318	rs7327329:114989575:T:C	114224100	114224100	0	3.78914e-08	-0.224668	0.0387341	-464860	Distal non-mGene
cg06586376	chr13	114226390	114226389	rs56823488:114990036:T:G	114224561	114224561	0	3.95663e-08	-0.423629	0.0731482	-465321	Distal non-mGene
cg17664580	chr14	20468740	20468739	rs1713426:20936077:A:G	20467918	20467918	0	1.20432e-08	0.212915	0.0352918	216182	Distal non-mGene
cg07567326	chr14	20468949	20468948	rs1713426:20936077:A:G	20467918	20467918	0	3.18844e-07	0.189934	0.0354853	216182	Distal non-mGene
cg18924965	chr14	20683337	20683336	rs2067689:21149930:T:C	20681771	20681771	0	7.89304e-17	0.403513	0.0428549	-348459	Distal non-mGene
cg04334406	chr14	20683351	20683350	rs2067689:21149930:T:C	20681771	20681771	0	1.13944e-15	0.456	0.0508541	-348459	Distal non-mGene
cg02233893	chr14	20688300	20688299	rs1010458:21156472:G:A	20688313	20688313	0	2.40468e-07	-0.173865	0.0321196	-355001	Distal non-mGene
cg25350264	chr14	21071286	21071285	rs11629332:21564434:T:A	21096275	21096275	0	6.16742e-12	-0.154526	0.0206892	-25403	Distal mGene
cg13252730	chr14	22506502	22506501	rs6572494:22973042:G:C	22504056	22504056	0	7.92945e-14	0.160109	0.0194317	-300963	Distal non-mGene
cg04284196	chr14	22506263	22506262	rs11377724:22973212:T:TG	22504226	22504226	0	3.84684e-10	0.164061	0.02447	-301133	Distal non-mGene
cg15765678	chr14	22547339	22547338	rs56298757:23016457:C:G	22547516	22547516	0	4.92614e-11	-0.272381	0.0384207	-344423	Distal non-mGene
cg02676199	chr14	22547369	22547368	rs56298757:23016457:C:G	22547516	22547516	0	3.9043e-13	-0.225371	0.0283102	-344423	Distal non-mGene
cg10328044	chr14	22557626	22557625	rs149800746:23026206:T:TC	22557312	22557312	0	3.32888e-19	0.234886	0.0227579	-354219	Distal non-mGene
cg04449239	chr14	22866418	22866417	rs67359274:23327259:A:AG	22858050	22858050	0	2.43559e-07	-0.182841	0.0337948	-654957	Distal non-mGene
cg15378219	chr14	22930391	22930390	rs3811185:23369378:T:C	22900169	22900169	0	4.34502e-08	0.0833791	0.0144452	-343107	Distal non-mGene
cg25600027	chr14	22919131	22919130	rs1043207:23369994:G:A	22900785	22900785	0	6.77065e-15	-0.132462	0.0152893	-343723	Distal non-mGene
cg21807240	chr14	22956562	22956561	rs80221219:23425817:G:A	22956608	22956608	0	1.94887e-11	-0.956158	0.131705	85559	Distal non-mGene
cg02282594	chr14	22929858	22929857	rs1043675:23456315:T:C	22987106	22987106	0	2.36699e-27	-1.21711	0.0910066	70432	Distal non-mGene
cg22746029	chr14	23106174	23106173	rs80285011:23581403:G:GTGTGTACT	23112194	23112194	0	1.41699e-14	-0.456123	0.0534282	73122	Distal non-mGene
cg25482033	chr14	23183693	23183692	rs761875:23656881:C:A	23187672	23187672	0	2.30205e-07	0.115743	0.0213454	-3998	Distal mGene
cg27497578	chr14	23446670	23446669	rs12436692:23914253:C:T	23445044	23445044	0	1.2062e-19	-0.536271	0.051134	-138209	Distal non-mGene
cg00837860	chr14	23550905	23550904	rs7159262:24020127:A:C	23550918	23550918	0	9.56689e-09	0.166822	0.0274418	-81230	Distal non-mGene
cg22268113	chr14	23567694	23567693	rs7159262:24020127:A:C	23550918	23550918	0	3.92173e-11	-0.364606	0.0511261	-81230	Distal non-mGene
cg03269926	chr14	23567854	23567853	rs3835264:24020722:GA:G	23551513	23551514	0	1.58475e-14	-0.443995	0.0521251	-81825	Distal non-mGene
cg06533570	chr14	23567916	23567915	rs28403575:24025340:C:T	23556131	23556131	0	7.93583e-24	-0.581172	0.0482112	-249296	Distal non-mGene
cg02945646	chr14	23567961	23567960	rs28403575:24025340:C:T	23556131	23556131	0	5.80179e-22	-0.614282	0.0540838	-249296	Distal non-mGene
cg23162655	chr14	23567978	23567977	rs28403575:24025340:C:T	23556131	23556131	0	3.07655e-29	-0.672516	0.0477503	-249296	Distal non-mGene
cg22578262	chr14	23568008	23568007	rs28403575:24025340:C:T	23556131	23556131	0	1.67409e-12	-0.294681	0.0382559	-249296	Distal non-mGene
cg23799099	chr14	24137211	24137210	rs2277482	24118586	24118586	0	4.22922e-07	0.110527	0.0208882	2370	Promoter non-mGene
cg14094181	chr14	24232515	24232514	rs111988830:24666856:C:T	24197650	24197650	0	4.92069e-12	0.143116	0.0190576	15823	Distal non-mGene
cg16461345	chr14	24232460	24232459	rs73589615:24713179:C:T	24243973	24243973	0	1.69923e-13	0.136942	0.0168924	55860	Distal non-mGene
cg11315141	chr14	24232463	24232462	rs73589615:24713179:C:T	24243973	24243973	0	2.70267e-13	0.16753	0.0208749	55860	Distal non-mGene
cg16109953	chr14	24232534	24232533	rs73589615:24713179:C:T	24243973	24243973	0	4.85639e-07	0.0746833	0.0141949	55860	Distal non-mGene
cg18720580	chr14	24299709	24299708	rs1051883:24761690:C:T	24292484	24292484	0	8.14519e-08	0.0724874	0.0128482	-28052	Distal non-mGene
cg16194253	chr14	24299776	24299775	rs45579332:24768949:G:C	24299743	24299743	0	1.64917e-20	0.300458	0.0277871	-67321	Distal non-mGene
cg25556905	chr14	24334720	24334719	rs1124644:24803956:A:C	24334750	24334750	0	3.05152e-15	0.341621	0.0388222	94536	Distal non-mGene
cg22990158	chr14	24332945	24332944	rs2332323:24804107:C:T	24334901	24334901	0	1.72871e-16	-0.186903	0.0201306	94385	Distal non-mGene
cg13105904	chr14	24430839	24430838	rs2273632:24898558:C:T	24429352	24429352	0	4.17656e-12	-0.833835	0.1106	-94259	Distal non-mGene
cg05170515	chr14	24429904	24429903	rs3825588:24900231:G:C	24431025	24431025	0	1.40607e-07	0.117472	0.0212536	-95932	Distal non-mGene
cg00873878	chr14	29529620	29529619	rs1191554:29998834:G:T	29529628	29529628	0	2.01273e-14	0.489297	0.0577222	-769298	Distal non-mGene
cg27612473	chr14	31421057	31421056	rs76645050:32050629:A:G	31581423	31581423	0	1.41661e-17	-0.676554	0.0697338	-91467	Distal non-mGene
cg23627301	chr14	32204163	32204162	rs1547213:32678646:C:A	32209440	32209440	0	4.6804e-08	0.131155	0.0227827	-133326	Distal non-mGene
cg23690804	chr14	32203339	32203338	rs199970725:32681082:GTTT:G	32211876	32211879	0	7.43702e-21	0.499719	0.0456665	-135083	Distal non-mGene
cg16661114	chr14	33792016	33792015	rs11156814:34261666:G:C	33792460	33792460	0	1.20809e-10	-0.203336	0.0293723	-857527	Distal mGene
cg10675363	chr14	35405658	35405657	rs3138052:35875021:T:C	35405815	35405815	0	1.21159e-16	0.444215	0.0475396	-283969	Distal non-mGene
cg12915636	chr14	35405755	35405754	rs10139836:35879551:G:C	35410345	35410345	0	3.96808e-07	-0.130138	0.0245304	-288499	Distal non-mGene
cg22612086	chr14	35417049	35417048	rs8008601	35418225	35418225	0	2.494e-17	0.151259	0.0157431	-296379	Distal non-mGene
cg13546414	chr14	36584460	36584459	rs55787458:37078724:T:C	36609519	36609519	0	1.19825e-08	-0.10354	0.0171595	-539092	Distal non-mGene
cg19777190	chr14	49635705	49635704	rs11157696:50105746:C:G	49639028	49639028	0	9.06429e-25	0.400509	0.0322816	128580	Distal non-mGene
cg21338260	chr14	49635617	49635616	rs6572611:50239513:A:G	49772795	49772795	0	2.61986e-07	0.179181	0.0332143	-84373	Distal non-mGene
cg25787588	chr14	50318235	50318234	rs2275591:50778816:A:C	50312098	50312098	0	2.37318e-21	-0.373223	0.0335366	249028	Distal non-mGene
cg15292009	chr14	50318839	50318838	rs2275591:50778816:A:C	50312098	50312098	0	1.28122e-20	-0.270142	0.0248885	249028	Distal non-mGene
cg02126031	chr14	54219599	54219598	rs4991195:54657676:C:T	54190958	54190958	0	1.43844e-07	0.12556	0.0227367	-1021904	Distal non-mGene
cg23511824	chr14	54349455	54349454	rs12894397:54812656:A:G	54345938	54345938	0	6.17838e-15	0.228791	0.0263604	-1176884	Distal non-mGene
cg11186706	chr14	54349028	54349027	rs28372627:54817486:T:C	54350768	54350768	0	2.60022e-07	-0.269689	0.0499766	-1181714	Distal non-mGene
cg11508718	chr14	54565110	54565109	rs59776732:55019393:A:T	54552675	54552675	0	3.64313e-07	0.202495	0.0380367	14422	Distal non-mGene
cg14936520	chr14	55412885	55412884	rs11624331:55879827:C:G	55413109	55413109	0	8.97004e-37	-0.8523	0.0501683	1075245	Distal non-mGene
cg03383916	chr14	55412932	55412931	rs11624331:55879827:C:G	55413109	55413109	0	1.62198e-27	-0.440335	0.0327741	1075245	Distal non-mGene
cg23573665	chr14	55440405	55440404	rs34705830:55894697:C:CA	55427979	55427979	0	2.01502e-12	-0.208293	0.0271576	1060375	Distal non-mGene
cg01525194	chr14	55430346	55430345	rs8007309:55896459:A:G	55429741	55429741	0	6.18059e-09	0.127309	0.0206466	1058613	Distal non-mGene
cg11999776	chr14	55447318	55447317	rs998871	55451584	55451584	0	1.15411e-10	-0.197259	0.0284594	1036770	Distal non-mGene
cg08195747	chr14	55447525	55447524	rs112584979:55920246:T:C	55453528	55453528	0	2.64843e-10	-0.358359	0.0528924	1034826	Distal non-mGene
cg08243676	chr14	56422546	56422545	rs1189140	56420474	56420474	0	7.27517e-11	-0.136119	0.019398	-861402	Distal non-mGene
cg08443549	chr14	56310771	56310770	rs17091538:56953366:C:G	56486648	56486648	0	2.76042e-07	0.387245	0.0719322	-1029922	Distal non-mGene
cg02821015	chr14	56487509	56487508	rs1890905	56487680	56487680	0	1.46269e-08	-0.20066	0.0334775	-1030954	Distal non-mGene
cg17208270	chr14	56491342	56491341	rs1890905	56487680	56487680	0	3.20472e-18	0.29086	0.0292377	-1030954	Distal non-mGene
cg24191463	chr14	56816598	56816597	rs148489117:57279128:T:C	56812410	56812410	0	2.09258e-14	-0.499059	0.0589204	773	Promoter non-mGene
cg01987659	chr14	59022405	59022404	rs17095565:59493053:A:G	59026335	59026335	0	8.46426e-19	-0.691186	0.067979	-598950	Distal non-mGene
cg09952226	chr14	59130901	59130900	rs12147351:59593355:A:G	59126637	59126637	0	8.62358e-07	-0.089753	0.0174778	338705	Distal non-mGene
cg01028245	chr14	59335755	59335754	rs33934407:59661859:CTT:C	59195141	59195143	0	2.30466e-11	0.265635	0.0367448	270201	Distal non-mGene
cg27395614	chr14	59871305	59871304	rs10129165:60354839:C:T	59888121	59888121	0	1.62065e-06	0.148415	0.029716	-17155	Distal mGene
cg16345520	chr14	59965451	59965450	rs34762394:60435690:G:GA	59968972	59968972	0	1.44834e-08	-0.235109	0.0392119	210410	Distal non-mGene
cg18906360	chr14	60166330	60166329	rs219315:60436202:G:A	59969484	59969484	0	5.96918e-14	-0.207557	0.0250404	209898	Distal non-mGene
cg26967100	chr14	60637315	60637314	rs11376858:61107662:C:CA	60640944	60640944	0	1.42746e-09	-0.299454	0.0464037	546615	Distal non-mGene
cg15412181	chr14	61832306	61832305	rs17256422:62321424:T:G	61854706	61854706	0	2.68692e-08	0.186105	0.0317012	-667147	Distal non-mGene
cg06749277	chr14	62158975	62158974	rs12889798:62627077:C:T	62160359	62160359	0	1.71719e-09	0.171786	0.0267687	941678	Distal non-mGene
cg00626853	chr14	62168979	62168978	rs56821135:62633862:A:T	62167144	62167144	0	3.41758e-20	1.00136	0.0936385	934893	Distal non-mGene
cg11479220	chr14	63869768	63869767	14:64266113:CT:C	63799395	63799396	0	1.36777e-10	-0.225611	0.0326997	538717	Distal non-mGene
cg24135211	chr14	63875565	63875564	14:64266113:CT:C	63799395	63799396	0	1.97989e-11	-0.184583	0.0254352	538717	Distal non-mGene
cg27356520	chr14	65169485	65169484	rs76513419:65636202:C:T	65169484	65169484	0	3.47992e-20	-2.36994	0.221677	835039	Distal non-mGene
cg00752580	chr14	67565699	67565698	rs1465118:68032874:C:T	67566157	67566157	0	6.45979e-07	-0.161027	0.0309733	-32418	Distal non-mGene
cg16576052	chr14	67572083	67572082	rs4902489:68041915:T:C	67575198	67575198	0	4.11168e-10	-0.156408	0.0233726	-41459	Distal non-mGene
cg12552299	chr14	67618288	67618287	rs59649528:68068512:G:A	67601795	67601795	0	6.64292e-16	-1.21661	0.134312	100091	Distal non-mGene
cg07922154	chr14	67620623	67620622	rs6573787:68089153:A:T	67622436	67622436	0	1.8187e-16	-0.210868	0.0227326	-2638	Distal mGene
cg20211272	chr14	67727110	67727109	rs377047632:68175511:CTT:C	67708794	67708796	0	3.41212e-19	-0.622223	0.0603105	-175493	Distal non-mGene
cg00421385	chr14	68264381	68264380	rs4902562:68731458:A:G	68264741	68264741	0	2.2373e-11	-0.212842	0.0294199	531512	Distal non-mGene
cg01928902	chr14	68792924	68792923	rs1051533	68792945	68792945	0	1.10739e-06	0.256651	0.0505245	-973166	Distal non-mGene
cg16978432	chr14	68796353	68796352	rs168962:69282711:C:G	68815994	68815994	0	2.61292e-07	-0.154015	0.0285464	-996215	Distal non-mGene
cg03189333	chr14	68816818	68816817	rs4899262:69283545:G:A	68816828	68816828	0	4.15845e-19	0.156301	0.0151977	-997049	Distal non-mGene
cg09712779	chr14	68863424	68863423	rs445863:69331177:T:C	68864460	68864460	0	2.0436e-11	0.21134	0.0291455	288690	Distal non-mGene
cg11724590	chr14	68998368	68998367	rs3809393:69446113:C:A	68979396	68979396	0	1.02821e-10	0.207928	0.0299056	-1162806	Distal non-mGene
cg10714501	chr14	69101405	69101404	rs145981954:69527663:C:CAAGTT	69060946	69060946	0	3.78893e-14	0.214244	0.025604	-81506	Distal non-mGene
cg06881965	chr14	69133291	69133290	14:69577593:CAAAAAAAAAAAAAAA:C	69110876	69110891	0	7.53806e-09	-0.147013	0.0239956	-249114	Distal non-mGene
cg06809965	chr14	69603617	69603616	rs2332094:70069672:A:G	69602955	69602955	0	1.70776e-25	-0.593756	0.0468347	8641	Distal non-mGene
cg12793324	chr14	69606474	69606473	rs8006991:70070484:T:C	69603767	69603767	0	9.20277e-11	-0.277313	0.0397669	7829	Distal non-mGene
cg11344148	chr14	69726760	69726759	rs7143960:70172278:C:T	69705561	69705561	0	1.55502e-22	0.609045	0.0526316	-93965	Distal non-mGene
cg12848614	chr14	69726780	69726779	rs7143960:70172278:C:T	69705561	69705561	0	1.58623e-25	0.579459	0.0456638	-93965	Distal non-mGene
cg25255025	chr14	69746496	69746495	rs35018420:70276875:TA:T	69810158	69810159	0	7.01417e-11	0.215787	0.0307215	549573	Distal non-mGene
cg11812810	chr14	70640977	70640976	rs12589444:71107939:C:G	70641222	70641222	0	4.3739e-07	0.523868	0.0991413	168983	Distal non-mGene
cg10392721	chr14	70641215	70641214	rs12589444:71107939:C:G	70641222	70641222	0	1.02816e-07	0.134732	0.024089	168983	Distal non-mGene
cg01928351	chr14	70637972	70637971	rs1572678:71107942:C:T	70641225	70641225	0	6.36038e-10	-0.858253	0.129866	168980	Distal non-mGene
cg03762817	chr14	70640323	70640322	rs1572678:71107942:C:T	70641225	70641225	0	2.64725e-07	-0.360797	0.0669076	168980	Distal non-mGene
cg18105612	chr14	70822806	70822805	rs8019053:71281398:G:T	70814681	70814681	0	1.0582e-11	0.243146	0.0329862	-213991	Distal non-mGene
cg15332261	chr14	70908633	70908632	rs221893:71611414:G:A	71144697	71144697	0	9.34249e-28	0.149268	0.0110361	175752	Distal non-mGene
cg25554810	chr14	72836516	72836515	rs61986332:73318473:G:T	72851765	72851765	0	5.46753e-12	0.31293	0.041776	42351	Distal mGene
cg12913429	chr14	72894150	72894149	rs77221555:73353331:G:A	72886623	72886623	0	1.48249e-18	0.611467	0.0606896	-954184	Distal non-mGene
cg26057784	chr14	72895507	72895506	exm2272111	72888423	72888423	0	8.32297e-09	-0.227945	0.0373257	-955984	Distal non-mGene
cg07171024	chr14	72894333	72894332	rs3814866:73361021:A:C	72894313	72894313	0	1.27279e-08	0.0904383	0.0150183	-197	Promoter mGene
cg19948037	chr14	72926094	72926093	rs12432523:73364901:C:T	72898193	72898193	0	2.50259e-07	-0.586875	0.10859	-965754	Distal non-mGene
cg15804993	chr14	72906556	72906555	rs199942698:73374632:CAAAA:C	72907924	72907928	0	4.96615e-13	-0.224333	0.0283308	-975485	Distal non-mGene
cg17061098	chr14	73465406	73465405	rs17182412:73932082:C:T	73465376	73465376	0	7.09874e-07	-0.186722	0.0360593	-1734	Promoter non-mGene
cg26251192	chr14	73536496	73536495	rs8014023:73972289:A:G	73505585	73505585	0	5.25721e-14	-0.545331	0.0656163	128356	Distal non-mGene
cg06566077	chr14	73797530	73797529	rs12887033:74292128:C:T	73825425	73825425	0	5.57027e-17	-0.349989	0.036942	-35140	Distal non-mGene
cg21393486	chr14	73809352	73809351	rs12887033:74292128:C:T	73825425	73825425	0	1.16033e-13	0.25089	0.0306962	-35140	Distal non-mGene
cg16702313	chr14	73785224	73785223	rs12879677:74294896:C:G	73828193	73828193	0	4.62941e-07	0.11328	0.0214882	-37908	Distal non-mGene
cg13575339	chr14	74241611	74241610	rs11627178:74718280:G:C	74251577	74251577	0	1.48025e-11	-0.341214	0.0466772	-166781	Distal non-mGene
cg23335124	chr14	74493683	74493682	rs2358787:74937514:T:C	74470811	74470811	0	6.95014e-17	0.136781	0.014494	-167742	Distal non-mGene
cg16374328	chr14	74493693	74493692	rs4899515:74956499:G:C	74489796	74489796	0	8.76122e-08	0.119809	0.0212932	-186727	Distal non-mGene
cg10317198	chr14	74493705	74493704	rs4899515:74956499:G:C	74489796	74489796	0	4.03222e-13	0.120545	0.0151532	-186727	Distal non-mGene
cg18606630	chr14	74934090	74934089	rs722685:75382682:C:T	74915979	74915979	0	2.48371e-10	-0.244175	0.0359749	211365	Distal non-mGene
cg20682842	chr14	74923655	74923654	rs7146041:75395429:G:A	74928726	74928726	0	9.16872e-15	-0.273184	0.0317221	198618	Distal non-mGene
cg15890469	chr14	74942144	74942143	rs8185:75408789:T:C	74942086	74942086	0	1.38799e-16	-0.293685	0.0315068	185258	Distal non-mGene
cg01759218	chr14	76349195	76349194	rs8015426:76815455:G:C	76349112	76349112	0	3.33839e-13	-0.196084	0.0245464	-446976	Distal non-mGene
cg10709267	chr14	76375544	76375543	rs2361000:76821633:T:C	76355290	76355290	0	4.60623e-11	0.245828	0.0346148	-453154	Distal non-mGene
cg27630347	chr14	76710740	76710739	rs147714566:77223307:CA:C	76756964	76756965	0	3.84587e-08	0.326429	0.056308	4424	Distal non-mGene
cg27333039	chr14	76917890	76917889	rs148744795:77385148:ACAGGTGTC:A	76918805	76918813	0	5.45293e-14	0.221331	0.0266517	122259	Distal non-mGene
cg18703122	chr14	77040875	77040874	rs17105272:77529783:C:T	77063440	77063440	0	1.30497e-07	0.188907	0.0340807	-237068	Distal non-mGene
cg06769150	chr14	77076421	77076420	rs2160664	77076151	77076151	0	5.90743e-07	0.123433	0.0236529	-249779	Distal non-mGene
cg02181287	chr14	77319442	77319441	rs8008449:77780784:G:A	77314441	77314441	0	5.55383e-09	-0.131927	0.0213222	-216130	Distal non-mGene
cg02472379	chr14	77654343	77654342	rs2364581:78120752:A:G	77654409	77654409	0	6.24133e-13	-0.208451	0.0264598	145674	Distal non-mGene
cg02557136	chr14	77817416	77817415	rs61498143:78282769:T:A	77816426	77816426	0	2.75539e-07	0.244597	0.0454315	-163371	Distal non-mGene
cg18311665	chr14	79016829	79016828	rs9323669:79482887:C:T	79016544	79016544	0	5.39864e-07	0.098477	0.0187998	1942973	Distal non-mGene
cg13372234	chr14	80941718	80941717	rs12880075:81291352:T:C	80825008	80825008	0	4.72507e-08	-0.0923434	0.0160463	-2654635	Distal non-mGene
cg23234607	chr14	80955420	80955419	rs12890859	80951744	80951744	0	6.75498e-20	-0.292181	0.0276099	218670	Distal non-mGene
cg19563130	chr14	80955755	80955754	rs12590277:81420487:G:A	80954143	80954143	0	2.20493e-09	-0.214444	0.0336712	216271	Distal non-mGene
cg08709692	chr14	81170707	81170706	rs1864167:81637074:G:A	81170730	81170730	0	5.30275e-27	0.383838	0.0289856	-215741	Distal non-mGene
cg01989461	chr14	81221411	81221410	rs1864167:81637074:G:A	81170730	81170730	0	6.35332e-11	0.140718	0.0199817	-215741	Distal non-mGene
cg23690444	chr14	81436393	81436392	rs12889439:81907822:A:G	81441478	81441478	0	1.92291e-10	0.124629	0.0182324	-5013	Distal non-mGene
cg12102016	chr14	88793405	88793404	rs10141775:89257187:T:C	88790843	88790843	0	1.98999e-09	0.171159	0.0267907	31308	Distal non-mGene
cg02190211	chr14	89957009	89957008	rs942190	89956320	89956320	0	1.05253e-08	-0.13847	0.0228498	-942934	Distal non-mGene
cg14092571	chr14	90277640	90277639	rs3742669:90767746:C:A	90301402	90301402	0	4.85085e-26	0.343348	0.0266529	515077	Distal non-mGene
cg11842153	chr14	90757126	90757125	rs730975:91224548:A:T	90758204	90758204	0	3.20157e-07	0.0988495	0.0184711	-426067	Distal non-mGene
cg09167301	chr14	91324154	91324153	exm2260387	91324222	91324222	0	2.42119e-21	-0.302014	0.0271459	93622	Distal mGene
cg17919186	chr14	91417212	91417211	rs1285850:91885706:A:G	91419362	91419362	0	1.17342e-10	0.204158	0.0294679	-1518	Promoter mGene
cg06932937	chr14	92385682	92385681	rs8020526:92852048:T:C	92385704	92385704	0	8.12749e-08	-0.168331	0.0298339	-63123	Distal mGene
cg02945499	chr14	92456340	92456339	rs4900123:92907270:G:A	92440926	92440926	0	7.2882e-10	0.2507	0.0380848	-318989	Distal non-mGene
cg19811934	chr14	92461420	92461419	rs4904920:92927655:G:A	92461311	92461311	0	2.01471e-16	0.166589	0.0179925	-339374	Distal non-mGene
cg16462006	chr14	94689448	94689447	rs11622883:95155776:T:A	94689439	94689439	0	3.13833e-08	-0.165789	0.0283939	786397	Distal non-mGene
cg09166666	chr14	95509080	95509079	rs179157:95975415:G:A	95509078	95509078	0	1.2842e-07	-0.137157	0.0247294	-33242	Distal non-mGene
cg05546763	chr14	95517047	95517046	rs12431440:95993103:C:G	95526766	95526766	0	5.84177e-09	-0.17551	0.0284122	-50930	Distal non-mGene
cg08426826	chr14	95532734	95532733	rs910792:95996822:A:G	95530485	95530485	0	7.07826e-07	-0.110126	0.0212646	-54649	Distal non-mGene
cg02940042	chr14	95534538	95534537	rs79239313:96000890:G:A	95534553	95534553	0	2.39473e-17	0.248025	0.0257965	-58717	Distal non-mGene
cg13511115	chr14	95534542	95534541	rs79239313:96000890:G:A	95534553	95534553	0	1.41763e-18	0.345215	0.0342383	-58717	Distal non-mGene
cg14179830	chr14	95979896	95979895	rs200971171:96463011:G:T	95996674	95996674	0	1.58584e-06	-0.148282	0.0296602	-423112	Distal non-mGene
cg07189780	chr14	96093136	96093135	rs1062710	96093122	96093122	0	7.9136e-13	0.227542	0.0290379	183601	Distal non-mGene
cg12891727	chr14	96299539	96299538	rs8022264:96859605:C:T	96393268	96393268	0	4.8258e-10	-0.166851	0.0250473	-29398	Distal mGene
cg03882313	chr14	99522615	99522614	rs56085816:99983135:A:C	99516798	99516798	0	5.9521e-09	0.118488	0.0191927	87758	Distal non-mGene
cg15650039	chr14	99554727	99554726	rs6575735:100036463:C:T	99570126	99570126	0	9.74521e-08	-0.180098	0.0321356	33900	Distal mGene
cg14851485	chr14	99660349	99660348	rs4619332:100073216:C:G	99606879	99606879	1	4.09723e-07	0.946185	0.178585	-125710	Distal non-mGene
cg05715076	chr14	99609621	99609620	rs2022745:100074389:C:T	99608052	99608052	0	6.1362e-42	1.24864	0.0654696	-126883	Distal non-mGene
cg11753308	chr14	99620089	99620088	rs36087070:100078078:GT:G	99611741	99611742	0	7.79662e-10	-0.174995	0.0266364	-130572	Distal non-mGene
[truncated: 3,480 more rows]
