# Supplementary material for: QTL mapping of human retina DNA methylation identifies 87 gene-epigenome interactions in age-related macular degeneration
Source: Research Square preprint supplement (doi:10.21203/rs.3.rs-3011096/v1), 2023-06-16
Supplement: Supplementary file 58 [file Supplementary_Table28.xlsx]

## Sheet: Sheet1
Gene_ID	Gene_Symbol	chr	Gene_start	Gene_end	snp	hg38_pos_start	hg38_pos_end	Rank	Backward_nom_pval	Backward_slope	Backward_slope_se	TSS-variant_Distance	Type
ENSG00000078808	SDF4	chr1	1216909	1232031	rs3818646:1191870:C:T	1256490	1256490	0	3.29e-05	1.89115	0.450281	-140129	Distal non-eGene
ENSG00000187730	GABRD	chr1	2019325	2030751	rs3128310:1966453:C:T	2035014	2035014	0	2.13e-05	0.49868	0.115917	-31177	Distal non-eGene
ENSG00000272420	RP4-740C4.7	chr1	2363062	2363628	rs6682346:2295268:A:T	2363829	2363829	0	1.75e-31	0.44726	0.0350851	-151109	Distal non-eGene
ENSG00000158109	TPRG1L	chr1	3625003	3630127	rs12757620	3623460	3623460	0	1.24e-23	-0.670252	0.0627051	-169034	Distal non-eGene
ENSG00000158109	TPRG1L	chr1	3625003	3630127	exm7253	3632268	3632268	1	1.68e-23	-1.42694	0.133946	20493	Distal non-eGene
ENSG00000227372	TP73-AS1	chr1	3735602	3747336	rs148748031:3642669:GTGGA:G	3726105	3726109	0	1.02e-06	-1.43706	0.289404	-73585	Distal non-eGene
ENSG00000069424	KCNAB2	chr1	5991467	6101193	rs116585811:6301301:C:G	6241241	6241241	0	1.28e-06	1.29972	0.264268	-249775	Distal eGene
ENSG00000187017	ESPN	chr1	6424789	6461370	rs72633460:6474364:G:A	6414304	6414304	0	5.2e-11	-16.1953	2.39931	-19913	Distal non-eGene
ENSG00000007923	DNAJC11	chr1	6634169	6701924	rs56869714:6726450:T:TC	6666390	6666390	0	1.3e-07	1.0796	0.200849	118934	Distal non-eGene
ENSG00000270171	RP11-338N10.1	chr1	7693125	7694844	rs77721345:7748009:C:T	7687949	7687949	1	1.8e-09	0.886288	0.143948	-902625	Distal non-eGene
ENSG00000270035	RP11-338N10.2	chr1	7698304	7698872	rs17368220:7755729:T:C	7695669	7695669	1	3.84e-05	-0.408956	0.098226	-910345	Distal non-eGene
ENSG00000269978	RP11-338N10.3	chr1	7700705	7700970	rs4908680:7757998:T:G	7697938	7697938	0	1.9e-09	1.21568	0.19774	-912614	Distal non-eGene
ENSG00000270171	RP11-338N10.1	chr1	7693125	7694844	rs1539181:7761640:T:C	7701580	7701580	0	9.79e-43	0.883639	0.0570591	-916256	Distal non-eGene
ENSG00000270035	RP11-338N10.2	chr1	7698304	7698872	rs34600274:7762140:CAGG:C	7702080	7702083	0	5.13e-15	-0.825038	0.101389	-916756	Distal non-eGene
ENSG00000269925	RP3-467L1.6	chr1	7776384	7776775	rs707455	7765251	7765251	0	7.71e-07	0.107509	0.021408	-979927	Distal non-eGene
ENSG00000049245	VAMP3	chr1	7771270	7781432	1:7843711:T:C	7783651	7783651	0	1.31e-17	2.42847	0.271261	-998327	Distal non-eGene
ENSG00000270171	RP11-338N10.1	chr1	7693125	7694844	rs200670730:7973793:T:TG	7913733	7913733	2	1.01e-05	0.355745	0.0795619	-1128409	Distal non-eGene
ENSG00000116288	PARK7	chr1	7954292	7985505	rs7517357:8025275:C:T	7965215	7965215	0	2.5e-17	4.91885	0.554734	352611	Distal non-eGene
ENSG00000171621	SPSB1	chr1	9292881	9369532	rs76884273:9852271:C:A	9792213	9792213	0	1.86e-10	5.52	0.843877	118123	Distal non-eGene
ENSG00000171603	CLSTN1	chr1	9729027	9824526	rs11121497:9902820:A:G	9842762	9842762	0	1.94e-13	-28.4353	3.73536	-18236	Distal eGene
ENSG00000175279	APITD1	chr1	10430444	10442809	rs70997231:10487828:A:AT	10427771	10427771	0	1.2e-07	-0.432374	0.0802034	-517435	Distal non-eGene
ENSG00000142655	PEX14	chr1	10472289	10630758	rs2506896:10603716:T:C	10543659	10543659	0	2.84e-33	5.51712	0.418085	252991	Distal non-eGene
ENSG00000171824	EXOSC10	chr1	11066619	11099881	rs2791642:11117536:A:T	11057479	11057479	0	2.78e-09	-4.45375	0.732324	205028	Distal non-eGene
ENSG00000116663	FBXO6	chr1	11664125	11674354	rs3215522:11721833:CCT:C	11661776	11661778	0	4.02e-05	-0.276383	0.066562	-649432	Distal non-eGene
ENSG00000116670	MAD2L2	chr1	11674481	11691650	rs3010934:12685681:C:T	12625675	12625675	0	3.06e-05	-0.251235	0.0595783	-395608	Distal non-eGene
ENSG00000142634	EFHD2	chr1	15409896	15430343	rs115547634:15761915:C:T	15435419	15435419	0	1.35e-05	1.33635	0.303258	-188147	Distal non-eGene
ENSG00000162461	SLC25A34	chr1	15736406	15741396	rs1108185:16064144:A:G	15737649	15737649	0	9.16e-38	-1.09857	0.0768365	-210836	Distal non-eGene
ENSG00000238142	RP11-108M9.4	chr1	16888539	16889649	rs11203396:17237828:A:G	16911333	16911333	1	3.68e-10	0.593896	0.0923933	142837	Distal non-eGene
ENSG00000186715	MST1L	chr1	16754911	16770237	rs4920605:17315425:G:A	16988930	16988930	0	5.19e-18	-0.588001	0.0647947	-10004	Distal non-eGene
ENSG00000142623	PADI1	chr1	17205127	17246005	rs2143810:17440854:C:A	17114359	17114359	1	3.05e-05	0.310992	0.0737302	90767	Distal eGene
ENSG00000117115	PADI2	chr1	17066762	17119435	rs2746482:17465937:A:G	17139442	17139442	0	4.2e-46	-43.4161	2.66707	65684	Distal non-eGene
ENSG00000117154	IGSF21	chr1	18107747	18378483	rs12759956:18432831:T:A	18106337	18106337	0	1.35e-17	2.35581	0.26327	1409	Promoter eGene
ENSG00000127463	EMC1	chr1	19215665	19251552	rs3748757:19491857:T:C	19165363	19165363	1	3.4e-08	-0.386041	0.0685755	44913	Distal non-eGene
ENSG00000127463	EMC1	chr1	19215665	19251552	rs2073104:19564650:C:G	19238156	19238156	0	1.18e-09	-0.502533	0.0806592	-27655	Distal non-eGene
ENSG00000053371	AKR7A2	chr1	19303966	19312146	rs2227295:19638309:A:G	19311815	19311815	0	5.69e-06	0.60993	0.132611	285164	Distal non-eGene
ENSG00000158816	VWA5B1	chr1	20290920	20354894	rs10737446:20542393:A:G	20215900	20215900	1	2.08e-05	-0.351672	0.0816535	292261	Distal non-eGene
ENSG00000162545	CAMK2N1	chr1	20482392	20486220	rs10737446:20542393:A:G	20215900	20215900	1	7.06e-07	-0.408211	0.0809947	292261	Distal non-eGene
ENSG00000142677	IL22RA1	chr1	24119772	24143121	rs60217046:24508689:CAA:C	24182199	24182201	1	2.92e-05	0.308999	0.0730866	234735	Distal non-eGene
ENSG00000185436	IFNLR1	chr1	24154158	24187959	rs12094257:24513608:C:T	24187118	24187118	0	4.15e-22	-0.721162	0.0702472	229816	Distal non-eGene
ENSG00000169504	CLIC4	chr1	24745358	24844324	rs7535819:25173037:T:C	24846546	24846546	0	6.34e-09	11.7141	1.97349	361593	Distal non-eGene
ENSG00000117640	MTFR1L	chr1	25818641	25832942	rs2294226:26146449:C:T	25819958	25819958	0	5.97e-50	-8.30908	0.483798	-389766	Distal non-eGene
ENSG00000158008	EXTL1	chr1	26019885	26036464	rs58286202:26339903:G:A	26013412	26013412	0	1.01e-11	0.430114	0.0613434	-106421	Distal non-eGene
ENSG00000158006	PAFAH2	chr1	25959768	25998157	rs3008244:26344477:G:A	26017986	26017986	0	4.2e-20	-2.55886	0.263963	-110995	Distal non-eGene
ENSG00000142675	CNKSR1	chr1	26177404	26189886	rs8768:26497340:A:C	26170849	26170849	0	2.73e-42	1.0405	0.0676497	38892	Distal non-eGene
ENSG00000236155	RP11-231P20.2	chr1	26209742	26229840	rs11247878:26560962:C:T	26234471	26234471	0	8.7e-07	-0.245637	0.0491536	-123306	Distal non-eGene
ENSG00000130772	MED18	chr1	28329003	28335967	rs145850575:29536018:CAG:C	29209506	29209508	0	4.14e-05	0.619412	0.149427	-322415	Distal non-eGene
ENSG00000116497	S100PBP	chr1	32816768	32858879	rs3831935:33318931:TG:T	32853330	32853331	0	4.95e-11	-1.95305	0.289005	227666	Distal non-eGene
ENSG00000160097	FNDC5	chr1	32862269	32872482	rs11576800:33344978:C:T	32879377	32879377	0	2.28e-08	-1.01328	0.177649	201619	Distal non-eGene
ENSG00000116514	RNF19B	chr1	32936446	32964685	rs520309:33398256:T:C	32932655	32932655	0	1.72e-39	-0.904518	0.0614753	54420	Distal non-eGene
ENSG00000134686	PHC2	chr1	33323624	33431052	rs77244502:33761211:C:CAG	33295610	33295610	0	1.51e-07	4.2985	0.803995	135442	Distal eGene
ENSG00000020129	NCDN	chr1	35557474	35567274	rs6702609:35060339:G:C	34594738	34594738	0	2.56e-05	2.56772	0.602827	-428896	Distal non-eGene
ENSG00000092847	AGO1	chr1	35869809	35930528	rs72901297:36184589:C:T	35718988	35718988	0	1.25e-11	4.42552	0.634211	-161515	Distal non-eGene
ENSG00000054116	TRAPPC3	chr1	36136571	36156053	rs5773520:36633897:G:GA	36168296	36168296	1	2.07e-05	0.335304	0.0778282	56120	Distal non-eGene
ENSG00000116883	RP11-268J15.5	chr1	36323735	36329221	rs34474512:36782364:CT:C	36316763	36316764	0	2.46e-08	1.94644	0.342096	69133	Distal non-eGene
ENSG00000116922	C1orf109	chr1	37681571	37692249	rs684260:38148765:A:G	37683093	37683093	0	7.23e-12	0.939635	0.133032	-208682	Distal non-eGene
ENSG00000243970	PPIEL	chr1	39531839	39558707	rs17568616:39682662:A:T	39216990	39216990	0	1.58e-07	-0.366522	0.0686751	-135674	Distal non-eGene
ENSG00000043514	TRIT1	chr1	39841023	39883511	rs230304:40282818:A:G	39817146	39817146	1	2.63e-08	0.448816	0.079059	137966	Distal non-eGene
ENSG00000131238	PPT1	chr1	40072706	40097703	rs3131656:40548690:G:A	40083018	40083018	0	6.82e-17	-6.35812	0.728113	261832	Distal non-eGene
ENSG00000159479	MED8	chr1	43383918	43389808	rs34148772:43820936:C:CT	43355265	43355265	0	1.5e-06	1.99656	0.408744	-84329	Distal non-eGene
ENSG00000126091	ST3GAL3	chr1	43705825	43931165	rs114361356:44161275:G:A	43695604	43695604	1	1.33e-07	-1.14804	0.21373	278883	Distal non-eGene
ENSG00000229444	RP11-184I16.4	chr1	43709393	43727343	rs76760124:44186396:A:G	43720725	43720725	1	2.87e-08	-0.829198	0.146475	-14901	Distal non-eGene
ENSG00000117408	IPO13	chr1	43946940	43968022	rs150936757:44444138:C:G	43978466	43978466	0	1.26e-08	-5.64852	0.971854	-328308	Distal non-eGene
ENSG00000126088	UROD	chr1	45012148	45015575	rs57139686:45304774:G:A	44839102	44839102	0	6.48e-07	-1.11013	0.219504	173045	Distal eGene
ENSG00000070785	EIF2B3	chr1	44850523	44986722	rs57139686:45304774:G:A	44839102	44839102	0	6.45e-10	1.01638	0.160485	173045	Distal non-eGene
ENSG00000162415	ZSWIM5	chr1	45016400	45306209	rs72686447:45766922:C:T	45301250	45301250	0	7.79e-05	1.61687	0.405007	4959	Distal eGene
ENSG00000117425	PTCH2	chr1	44819845	44843063	exm55344	45566639	45566639	0	5.74e-08	0.726766	0.131385	-75473	Distal non-eGene
ENSG00000085998	POMGNT1	chr1	46188683	46220305	rs28364741:46664249:A:G	46198577	46198577	0	9.19e-06	-1.8908	0.420802	-411590	Distal non-eGene
ENSG00000117480	FAAH	chr1	46394266	46413848	rs59914572:46990865:A:G	46525193	46525193	2	3.3e-05	0.367944	0.0876242	-130928	Distal eGene
ENSG00000169213	RAB3B	chr1	51907957	51990764	rs71247585:52360939:T:TA	51895267	51895267	0	4.37e-07	-1.76066	0.342758	100473	Distal non-eGene
ENSG00000162383	SLC1A7	chr1	53087180	53142632	rs1769299:53585723:G:T	53120051	53120051	1	1.26e-08	-0.396604	0.0682344	22581	Distal eGene
ENSG00000081870	HSPB11	chr1	53916575	53945929	rs1063162:54412181:T:C	53946508	53946508	0	8.3e-13	-0.704227	0.0952224	-56674	Distal non-eGene
ENSG00000116209	TMEM59	chr1	54026682	54053504	rs112235026:54515796:CT:C	54050123	54050124	0	3.42e-05	7.96911	1.90139	-211263	Distal non-eGene
ENSG00000116221	MRPL37	chr1	54184042	54225464	rs642990	54222843	54222843	0	8.44e-08	-0.704948	0.129152	190636	Distal non-eGene
ENSG00000213625	LEPROT	chr1	65420588	65436007	rs10493377:65879252:A:G	65413569	65413569	0	1.85e-12	1.58306	0.217632	-165350	Distal non-eGene
ENSG00000152760	TCTEX1D1	chr1	66752460	66778787	rs7515248:67239462:T:C	66773779	66773779	1	3.44e-10	-0.614029	0.0953622	458074	Distal non-eGene
ENSG00000172380	GNG12	chr1	67701467	67833467	rs114823637:68321186:A:G	67855503	67855503	1	7.39e-06	0.545992	0.120219	-23200	Distal non-eGene
ENSG00000116729	WLS	chr1	68098474	68233120	rs12564247:68593243:C:T	68127560	68127560	0	5.29e-06	10.4149	2.25649	115495	Distal non-eGene
ENSG00000116761	CTH	chr1	70411219	70439851	rs10889869:70877964:G:A	70412281	70412281	0	2.04e-11	-0.868162	0.125826	-57547	Distal non-eGene
ENSG00000162642	C1orf52	chr1	85249954	85259672	rs11161574	85261361	85261361	0	8.7e-06	-0.567166	0.125885	-264248	Distal non-eGene
ENSG00000137944	KYAT3	chr1	88935774	88992953	rs1409150	89007492	89007492	1	6.95e-05	-0.278697	0.069326	282845	Distal non-eGene
ENSG00000197147	LRRC8B	chr1	89524837	89597864	rs12129364:90256485:A:C	89790926	89790926	1	3.35e-06	-0.370609	0.0786119	197018	Distal non-eGene
ENSG00000162669	HFM1	chr1	91260767	91404869	rs17131429:91870410:G:C	91404853	91404853	0	1.08e-29	0.909747	0.0740053	16	Promoter eGene
ENSG00000198691	ABCA4	chr1	93992836	94121132	rs3789398:94511533:G:A	94045977	94045977	1	6.47e-06	0.345666	0.0756167	75155	Distal eGene
ENSG00000137962	ARHGAP29	chr1	94148989	94275068	rs5776202:94550715:G:A	94085159	94085159	0	1.25e-08	0.460514	0.0792233	189909	Distal eGene
ENSG00000198691	ABCA4	chr1	93992836	94121132	rs3827713:94576524:G:C	94110968	94110968	0	9.77e-09	0.394057	0.0672667	10164	Distal eGene
ENSG00000137962	ARHGAP29	chr1	94148989	94275068	rs71588516:94709788:CAA:C	94244232	94244234	1	1.1e-06	0.357586	0.0722493	-123100	Distal non-eGene
ENSG00000224081	LINC01057	chr1	94613815	94855426	rs79367739:95249000:A:G	94783444	94783444	0	2.08e-05	0.463174	0.107533	-364989	Distal non-eGene
ENSG00000117600	PLPPR4	chr1	99263954	99309590	rs114906184:99689054:G:A	99223498	99223498	0	6.24e-06	-4.79819	1.04784	377497	Distal non-eGene
ENSG00000162688	AGL	chr1	99850085	99924023	rs7543433:100277039:T:C	99811483	99811483	0	1.55e-09	0.480253	0.0776707	533542	Distal non-eGene
ENSG00000134222	PSRC1	chr1	109279557	109283186	rs649281:109799244:T:C	109256622	109256622	0	1.84e-07	-0.611252	0.115164	169805	Distal non-eGene
ENSG00000162650	ATXN7L2	chr1	109483480	109492804	rs10494041:110031990:C:G	109489368	109489368	0	2.81e-08	0.516409	0.0911528	50504	Distal non-eGene
ENSG00000116396	KCNC4	chr1	110211344	110283100	rs12739021:110842850:T:C	110300228	110300228	0	3.8e-09	0.543707	0.09022	-88885	Distal eGene
ENSG00000240194	CYMP	chr1	110480753	110491277	rs12407530:111003777:T:C	110461155	110461155	0	3.01e-42	1.10677	0.0720049	-429578	Distal non-eGene
ENSG00000085465	OVGP1	chr1	111414315	111427777	rs1264878:111947430:C:T	111404808	111404808	0	5.82e-09	-0.582667	0.0979103	-204037	Distal non-eGene
ENSG00000215866	LINC01356	chr1	112820171	112850643	rs11578535:113356094:T:C	112813472	112813472	0	1.3e-16	0.794543	0.0919005	142943	Distal non-eGene
ENSG00000163349	HIPK1	chr1	113929193	113977869	rs2147079:114469503:A:G	113926881	113926881	0	1.59e-09	-0.487332	0.0788786	-21680	Distal non-eGene
ENSG00000116774	OLFML3	chr1	113979392	114035572	rs56208418:114524980:TG:T	113982358	113982359	0	1.96e-06	0.132099	0.0273596	296917	Distal non-eGene
ENSG00000213240	RP11-458D21.5	chr1	146113653	146229000	rs78848289:145426261:C:T	146008767	146008767	0	5.16e-07	0.307552	0.0602639	-98578	Distal non-eGene
ENSG00000276509	CH17-353B19.1	chr1	146235807	146237807	rs78848289:145426261:C:T	146008767	146008767	0	5e-25	0.59753	0.0539863	-98578	Distal non-eGene
ENSG00000233396	RP11-458D21.1	chr1	146052567	146061948	rs79906727:145420676:T:C	146014328	146014328	0	1.95e-12	0.923215	0.127057	-128462	Distal non-eGene
ENSG00000271425	NBPF10	chr1	146064700	146144942	rs79906727:145420676:T:C	146014328	146014328	1	4.67e-12	0.908042	0.127329	-128462	Distal non-eGene
ENSG00000131778	CHD1L	chr1	147242642	147295766	rs10900330:146712302:T:G	147240653	147240653	0	2.61e-24	-0.671928	0.0617917	-68103	Distal non-eGene
ENSG00000180867	PDIA3P1	chr1	147178114	147179622	rs61091982:146721567:T:TTCTC	147249908	147249908	0	1.16e-21	-1.51966	0.149857	-77358	Distal non-eGene
ENSG00000162836	ACP6	chr1	147629653	147670496	rs77650336:147096505:C:T	147624704	147624704	1	8.55e-09	-1.72548	0.293341	-106829	Distal non-eGene
ENSG00000163125	RPRD2	chr1	150363092	150476566	rs138637164:150327896:C:CA	150355420	150355420	0	9.57e-08	-1.88575	0.347015	652955	Distal non-eGene
ENSG00000163156	SCNM1	chr1	151156665	151170297	rs61546100:151276819:G:GT	151304343	151304343	0	6.58e-05	0.495703	0.122895	43014	Distal non-eGene
ENSG00000237975	FLG-AS1	chr1	152168126	152445456	rs34372395:152167407:A:G	152194931	152194931	0	1.96e-43	1.03491	0.0661232	-26806	Distal eGene
ENSG00000163354	DCST2	chr1	155018521	155033781	rs11264297:155008973:T:C	155036497	155036497	0	7.75e-17	-4.9178	0.564282	-33867	Distal non-eGene
ENSG00000163357	DCST1	chr1	155033825	155050930	rs11264298:155009258:G:A	155036782	155036782	0	2.98e-06	0.721816	0.152297	-34152	Distal non-eGene
ENSG00000143537	ADAM15	chr1	155050567	155062775	rs11264298:155009258:G:A	155036782	155036782	0	5.48e-10	0.445563	0.0700479	-34152	Distal non-eGene
ENSG00000163382	NAXE	chr1	156591763	156594299	rs4661188	156590710	156590710	0	2.57e-21	1.60455	0.159777	-89882	Distal non-eGene
ENSG00000143303	RRNAD1	chr1	156728443	156736960	rs147665113:156695000:C:T	156725208	156725208	0	2.17e-07	-0.876714	0.166191	41717	Distal non-eGene
ENSG00000085552	IGSF9	chr1	159927040	159945604	rs10752634:159905268:T:C	159935478	159935478	0	4.67e-11	14.9774	2.21316	134770	Distal non-eGene
ENSG00000132681	ATP1A4	chr1	160151571	160186977	rs7526939:160150756:G:A	160180966	160180966	0	5.2e-08	-0.388122	0.0699318	81565	Distal non-eGene
ENSG00000143318	CASQ1	chr1	160190557	160201886	rs200641037:160164082:G:A	160194292	160194292	0	2.07e-07	-5.98644	1.1327	68239	Distal non-eGene
ENSG00000122218	COPA	chr1	160289274	160343400	rs4656892:160220213:A:G	160250423	160250423	0	3.29e-15	5.46271	0.666197	-151480	Distal non-eGene
ENSG00000143179	UCK2	chr1	165827532	165911618	rs6143465:165538453:CA:C	165569216	165569217	1	4.3e-05	-0.466925	0.112876	-123861	Distal non-eGene
ENSG00000224358	RP11-466F5.8	chr1	165768930	165775176	rs11430311:165687073:A:AT	165717836	165717836	0	3.31e-15	-0.40438	0.0493215	109695	Distal non-eGene
ENSG00000152382	TADA1	chr1	166856511	166876327	rs74900874:166851352:T:G	166882115	166882115	1	1.25e-06	-0.961986	0.195448	170436	Distal non-eGene
ENSG00000143195	ILDR2	chr1	166895712	166975482	rs2294220:166884129:A:C	166914892	166914892	0	2.55e-09	5.59436	0.917593	137659	Distal non-eGene
ENSG00000143190	POU2F1	chr1	167220830	167427345	rs10918673:167235524:C:T	167266287	167266287	0	2.52e-06	-5.19614	1.08814	252323	Distal non-eGene
ENSG00000198821	CD247	chr1	167430641	167518610	rs7527714:167503586:C:T	167534349	167534349	0	3.97e-05	0.14102	0.0339373	-367870	Distal non-eGene
ENSG00000143162	CREG1	chr1	167529678	167553767	rs10489191:167505895:T:C	167536658	167536658	1	7.48e-06	-0.507128	0.111724	-370179	Distal non-eGene
ENSG00000143162	CREG1	chr1	167529678	167553767	rs57323848:167507471:G:A	167538234	167538234	0	2.33e-45	-1.15023	0.0714238	-371755	Distal non-eGene
ENSG00000010165	METTL13	chr1	171781665	171814023	rs6681322:171773871:G:A	171804731	171804731	0	7.3e-07	0.429359	0.0853075	36767	Distal non-eGene
ENSG00000254154	RP4-798P15.3	chr1	177928789	178038007	rs16828594:177929379:C:T	177960244	177960244	1	1.59e-13	0.743182	0.0972443	-788747	Distal non-eGene
ENSG00000162779	AXDND1	chr1	179365721	179554735	rs16853998:179334917:G:C	179365782	179365782	0	1.22e-15	0.546217	0.0655054	-339978	Distal non-eGene
ENSG00000162779	AXDND1	chr1	179365721	179554735	rs17369102:179335138:A:G	179366003	179366003	3	3.4e-06	-0.390131	0.0828047	-340199	Distal non-eGene
ENSG00000162779	AXDND1	chr1	179365721	179554735	rs35129223:179335499:C:CT	179366364	179366364	1	2.46e-06	0.371158	0.0776363	-340560	Distal non-eGene
ENSG00000143337	TOR1AIP1	chr1	179882043	179925000	rs12145358:179676274:A:C	179707139	179707139	1	7.13e-05	0.701268	0.174708	36024	Distal non-eGene
ENSG00000135828	RNASEL	chr1	182573635	182589256	rs4652733:182567440:G:A	182598305	182598305	0	5.34e-57	3.7416	0.199016	190988	Distal non-eGene
ENSG00000116711	PLA2G4A	chr1	186828954	186988981	rs61377388:186938875:AT:A	186969743	186969744	0	1.19e-09	-0.352253	0.0565542	-534582	Distal non-eGene
ENSG00000023572	GLRX2	chr1	193096469	193106114	rs4657845:193072784:T:A	193103654	193103654	0	9.98e-06	0.223802	0.0500133	-44232	Distal non-eGene
ENSG00000118197	DDX59	chr1	200623897	200669969	rs114238836:200634625:G:A	200665497	200665497	1	1.11e-05	0.592682	0.133173	74061	Distal non-eGene
ENSG00000116857	TMEM9	chr1	201134773	201171574	rs77762614:201080110:C:T	201110982	201110982	1	8e-06	0.767354	0.169613	1584	Promoter non-eGene
ENSG00000081248	CACNA1S	chr1	201039513	201112566	rs2057580:201087615:G:A	201118487	201118487	0	4.11e-15	-1.6179	0.198067	-5921	Distal eGene
ENSG00000081277	PKP1	chr1	201283453	201332993	rs57522319:201235069:A:C	201265941	201265941	1	3.29e-16	0.751188	0.0881774	17511	Distal eGene
ENSG00000081277	PKP1	chr1	201283453	201332993	rs56287879:201237953:C:A	201268825	201268825	0	3.73e-33	-1.16892	0.088779	14627	Distal eGene
ENSG00000198892	SHISA4	chr1	201888681	201892306	rs4025034:201871833:A:C	201902705	201902705	0	5.38e-18	-1.09912	0.121182	43883	Distal non-eGene
ENSG00000117153	KLHL12	chr1	202891101	202928636	rs186476702:201917493:A:G	201948365	201948365	1	4.39e-05	-1.19573	0.289408	-1777	Promoter non-eGene
ENSG00000176393	RNPEP	chr1	201982373	202006147	rs200907052:201937067:AG:A	201967939	201967940	1	2.92e-08	-0.956766	0.169095	-138798	Distal non-eGene
ENSG00000176393	RNPEP	chr1	201982373	202006147	rs11810017:201950949:T:C	201981821	201981821	0	7.15e-12	0.504092	0.0713513	-93141	Distal non-eGene
ENSG00000117139	KDM5B	chr1	202724492	202809470	rs28419585:201968263:T:C	201999135	201999135	2	2.26e-06	-0.348785	0.0726908	145608	Distal non-eGene
ENSG00000170075	GPR37L1	chr1	202122859	202133592	rs4463734:202083061:A:C	202113933	202113933	0	2.81e-10	-0.600309	0.0927451	-105988	Distal non-eGene
ENSG00000170075	GPR37L1	chr1	202122859	202133592	rs11588918:202095560:G:A	202126432	202126432	1	4.56e-06	0.364146	0.0783497	-118487	Distal non-eGene
ENSG00000184774	MGAT4EP	chr1	202820267	202827225	rs4950923:202776448:G:A	202807320	202807320	0	1.42e-17	-0.620072	0.0693404	54300	Distal non-eGene
ENSG00000234996	RP11-480I12.9	chr1	202861755	202875241	rs2298261	202857410	202857410	0	7.97e-10	0.842749	0.133829	-47940	Distal non-eGene
ENSG00000122176	FMOD	chr1	203340629	203351489	rs16851364:203318144:G:A	203349016	203349016	0	2.77e-08	-5.67405	1.00109	126812	Distal non-eGene
ENSG00000188783	PRELP	chr1	203475829	203491352	rs6702882:203463640:G:A	203494512	203494512	0	1.63e-07	-9.00659	1.68933	-220871	Distal non-eGene
ENSG00000182004	SNRPE	chr1	203861604	203870550	rs368189070:203828803:TCTC:T	203859675	203859678	0	2.64e-15	1.50773	0.183187	213440	Distal non-eGene
ENSG00000224717	RP11-576D8.4	chr1	205455930	205469024	rs2759282:204846772:C:T	204877644	204877644	0	5.68e-05	0.27214	0.0668756	-48993	Distal non-eGene
ENSG00000133069	TMCC2	chr1	205228177	205273343	rs1172113:205226288:T:C	205257160	205257160	0	2.83e-14	-3.67004	0.46494	-28984	Distal eGene
ENSG00000163545	NUAK2	chr1	205302060	205321791	rs9793526:205320764:T:C	205351636	205351636	0	6.33e-07	-0.253729	0.0501222	152959	Distal non-eGene
ENSG00000162873	KLHDC8A	chr1	205336066	205357090	rs7530732:205321833:T:C	205352705	205352705	0	3.98e-08	-3.20029	0.571467	151890	Distal non-eGene
ENSG00000174514	MFSD4A	chr1	205568886	205602918	rs11240530:205564044:A:G	205594916	205594916	0	2.85e-13	-7.86419	1.04082	85543	Distal non-eGene
ENSG00000069275	NUCKS1	chr1	205712820	205750276	rs1418652:205646458:C:T	205677330	205677330	0	1.71e-09	-9.25807	1.5015	3129	Distal non-eGene
ENSG00000266094	RASSF5	chr1	206507531	206589448	rs34769485:206703098:C:CA	206529765	206529765	0	2.14e-08	-0.363688	0.063633	440860	Distal non-eGene
ENSG00000162889	MAPKAPK2	chr1	206684945	206734283	rs55730781:206895361:G:T	206722016	206722016	0	2.09e-08	1.78066	0.311336	201231	Distal non-eGene
ENSG00000143469	SYT14	chr1	209938175	210171389	rs28630860:210043322:A:C	209869977	209869977	0	4.68e-07	-2.47638	0.483396	68197	Distal eGene
ENSG00000117650	NEK2	chr1	211658658	211675630	rs785317:211851059:G:A	211677717	211677717	0	3.21e-12	-0.283905	0.0394908	357825	Distal non-eGene
ENSG00000066027	PPP2R5A	chr1	212285538	212361863	rs35872305:212446322:C:T	212272980	212272980	0	1.02e-10	-0.575498	0.086676	-237427	Distal non-eGene
ENSG00000117691	NENF	chr1	212432888	212446379	rs17666456:212627628:C:T	212454286	212454286	1	3.1e-06	0.518803	0.109656	-418733	Distal non-eGene
ENSG00000143499	SMYD2	chr1	214281103	214337131	rs17729519:214498421:T:C	214325078	214325078	0	3.08e-05	2.44712	0.580517	-1273845	Distal non-eGene
ENSG00000162813	BPNT1	chr1	220057483	220090462	rs10863537:220402403:T:C	220229061	220229061	0	3.34e-05	0.574924	0.136997	519164	Distal non-eGene
ENSG00000136628	EPRS	chr1	219968602	220046658	rs2814495:220452157:C:G	220278815	220278815	0	1.01e-06	4.2569	0.857194	469410	Distal non-eGene
ENSG00000143507	DUSP10	chr1	221701425	221742176	rs10863652	221749700	221749700	0	2.41e-05	-1.31731	0.308278	228823	Distal non-eGene
ENSG00000188460	ACTBP11	chr1	223863727	223864851	rs10915946:224074598:T:C	223886896	223886896	0	1.91e-07	-0.350978	0.0662111	-40924	Distal non-eGene
ENSG00000143742	SRP9	chr1	225777814	225790466	rs6677132	225779895	225779895	0	1.22e-05	-3.96022	0.894147	-314874	Distal non-eGene
ENSG00000162910	MRPL55	chr1	228106680	228109312	rs849749	228109044	228109044	0	7.64e-09	0.542477	0.0919106	30918	Distal non-eGene
ENSG00000182118	FAM89A	chr1	231018959	231040246	rs12750965:231085611:A:G	230949865	230949865	0	1.77e-07	1.05129	0.197761	29010	Distal non-eGene
ENSG00000116918	TSNAX	chr1	231528654	231566524	rs72764542:231109400:A:C	230973654	230973654	0	1.8e-05	-2.59352	0.59743	5221	Distal non-eGene
ENSG00000010072	SPRTN	chr1	231337105	231355023	rs34584064:231509427:T:C	231373681	231373681	0	8.47e-07	-0.572578	0.114453	51363	Distal non-eGene
ENSG00000135766	EGLN1	chr1	231363752	231425044	1:231558054:G:C	231422308	231422308	0	4.08e-07	-18.574	3.60621	106248	Distal non-eGene
ENSG00000231768	LINC01354	chr1	234527892	234531779	rs271738:234662890:G:A	234527144	234527144	0	7e-17	-0.500283	0.0573131	119145	Distal non-eGene
ENSG00000188739	RBM34	chr1	235131184	235161457	rs4567344:235270774:C:T	235107459	235107459	0	2.41e-05	0.686887	0.160752	-628356	Distal non-eGene
ENSG00000203667	COX20	chr1	244835323	244845057	rs10927331:244999396:G:A	244836094	244836094	0	5.26e-14	-7.04179	0.902306	28448	Distal non-eGene
ENSG00000203666	EFCAB2	chr1	244969706	245127164	rs140218267:245129294:CA:C	244965992	244965993	0	1.26e-111	-9.84865	0.309842	-101450	Distal non-eGene
ENSG00000067082	KLF6	chr10	3775997	3785281	rs28642347:3691639:T:C	3649447	3649447	0	2.05e-05	-3.24695	0.753142	1028707	Distal non-eGene
ENSG00000187522	HSPA14	chr10	14838165	14871741	rs12770830:14884509:G:A	14842510	14842510	0	1.63e-14	-1.79949	0.225708	-67613	Distal non-eGene
ENSG00000148484	RSU1	chr10	16590612	16817528	rs11254169	16748232	16748232	1	5.18e-06	-0.520289	0.112616	-226227	Distal non-eGene
ENSG00000225213	RP11-197M22.2	chr10	16721353	16748377	rs11254169	16748232	16748232	0	4.21e-12	-0.777967	0.108849	-226227	Distal non-eGene
ENSG00000120594	PLXDC2	chr10	19816240	20289856	rs6482066:20131614:G:C	19842685	19842685	0	3.96e-51	25.7062	1.47333	-26446	Distal eGene
ENSG00000095739	BAMBI	chr10	28677343	28682939	rs80125964:28946718:A:AC	28657789	28657789	0	1.52e-09	-2.12768	0.343901	631272	Distal non-eGene
ENSG00000107562	CXCL12	chr10	44370166	44386493	rs1023262:44893864:A:G	44398416	44398416	0	2.9e-06	0.608011	0.128123	561273	Distal non-eGene
ENSG00000165406	MARCHF8	chr10	45454586	45594906	rs143092405:47648204:A:G	46276968	46276968	1	1.79e-05	-1.01617	0.234059	-167347	Distal non-eGene
ENSG00000204179	PTPN20	chr10	46911397	47002488	rs148760862:46528170:A:G	47023847	47023847	0	1.06e-06	0.974103	0.196544	276539	Distal non-eGene
ENSG00000148572	NRBF2	chr10	63133248	63155031	rs35562567:64916030:AT:A	63156270	63156271	0	2.98e-26	-0.957964	0.0840622	-782078	Distal non-eGene
ENSG00000171988	JMJD1C	chr10	63167222	63521850	rs10995453:64934331:T:C	63174571	63174571	0	3.37e-05	-9.505	2.26594	490093	Distal non-eGene
ENSG00000156502	SUPV3L1	chr10	69180233	69209099	rs12780191:70988514:C:T	69228758	69228758	0	1.55e-09	-0.463238	0.0749211	41226	Distal non-eGene
ENSG00000156515	HK1	chr10	69269985	69401882	rs61869987:71076335:G:A	69316579	69316579	0	4.91e-08	-22.8529	4.10945	-46595	Distal eGene
ENSG00000099282	TSPAN15	chr10	69451474	69507669	rs10823398:71270363:C:A	69510607	69510607	0	7.48e-15	0.598921	0.0740863	119644	Distal non-eGene
ENSG00000107719	PALD1	chr10	70478822	70568449	rs1077877:72113697:G:A	70353941	70353941	0	7.39e-06	-0.325453	0.0716584	-120030	Distal non-eGene
ENSG00000172731	LRRC20	chr10	70298971	70382650	rs10823529	70358899	70358899	0	5.06e-06	0.519331	0.112288	-124988	Distal non-eGene
ENSG00000171224	C10orf35	chr10	69630252	69633599	rs35934374:72139080:G:A	70379324	70379324	0	2.13e-05	0.345166	0.0802349	-180085	Distal non-eGene
ENSG00000148719	DNAJB12	chr10	72332831	72355230	rs9416017:74100279:T:C	72340521	72340521	0	6.52e-07	-1.05456	0.208569	-66601	Distal non-eGene
ENSG00000156113	KCNMA1	chr10	76869602	77638595	rs2163798:78740285:C:A	76980527	76980527	0	8.01e-07	0.427948	0.0853476	-1579281	Distal non-eGene
ENSG00000156113	KCNMA1	chr10	76869602	77638595	rs1877998:79411740:G:A	77651982	77651982	1	2.45e-05	0.390137	0.0913711	-13387	Distal eGene
ENSG00000108175	ZMIZ1	chr10	79069036	79316528	rs61855573:79828919:G:A	78069161	78069161	0	3.82e-05	7.10966	1.70706	999874	Distal eGene
ENSG00000230417	LINC00856	chr10	78179186	78551355	rs7076791:80066149:G:A	78306392	78306392	0	2.4e-06	-0.160968	0.033638	-272632	Distal non-eGene
ENSG00000165678	GHITM	chr10	84139441	84153245	rs2306321:85910311:C:G	84150555	84150555	0	7.33e-20	1.32018	0.137181	44080	Distal non-eGene
ENSG00000204033	LRIT2	chr10	84220496	84225589	rs12217769:85981842:A:G	84222086	84222086	0	4.12e-30	25.6989	2.07255	-82646	Distal non-eGene
ENSG00000107779	BMPR1A	chr10	86756651	86932838	rs10572910:88646585:CT:C	86886828	86886829	1	1.27e-05	0.367655	0.0831655	-218379	Distal non-eGene
ENSG00000174721	FGFBP3	chr10	91906590	91909483	exm841649	91908651	91908651	0	9.73e-08	0.708946	0.130534	-110360	Distal non-eGene
ENSG00000095564	BTAF1	chr10	91923770	92030325	rs141297800:93784488:A:AGTTTTTTT	92024731	92024731	0	1.24e-06	10.56	2.14461	549345	Distal non-eGene
ENSG00000107864	CPEB3	chr10	92046693	92291087	rs7905501:94840716:C:T	93080959	93080959	0	4.58e-05	-1.33488	0.323911	401358	Distal non-eGene
ENSG00000176273	SLC35G1	chr10	93893974	93956062	rs1223468:95678793:G:T	93919036	93919036	0	2.84e-14	-0.51083	0.0647155	111776	Distal non-eGene
ENSG00000059573	ALDH18A1	chr10	95605930	95656706	rs1409709:97372559:A:G	95612802	95612802	0	2.61e-07	0.363384	0.0693564	-51388	Distal non-eGene
ENSG00000177853	ZNF518A	chr10	96129716	96205288	rs61869177:97776539:G:A	96016782	96016782	0	5.84e-05	-4.16458	1.02509	289913	Distal non-eGene
ENSG00000171307	ZDHHC16	chr10	97446132	97457370	rs1147592:98959853:A:T	97200096	97200096	0	5.6e-05	-1.80056	0.442082	-14176	Distal non-eGene
ENSG00000165879	FRAT1	chr10	97319268	97321915	rs72064334:98996560:GA:G	97236803	97236804	1	4.46e-05	-0.302497	0.0732813	-50883	Distal non-eGene
ENSG00000075290	WNT8B	chr10	100463042	100483744	rs7091622:102189651:T:A	100429894	100429894	0	1.9e-09	-0.330732	0.0537935	-99408	Distal non-eGene
ENSG00000065154	OAT	chr10	124397304	124418976	rs2674347:126077619:T:C	124389050	124389050	0	3.52e-24	5.60903	0.517502	-397140	Distal non-eGene
ENSG00000148814	LRRC27	chr10	132332155	132379918	10:134176718:C:A	132363214	132363214	0	1.22e-06	-3.4199	0.694072	-31367	Distal non-eGene
ENSG00000185627	PSMD13	chr11	236547	252984	rs10794302:234102:T:C	234102	234102	0	2.07e-34	-3.98728	0.295831	-26591	Distal non-eGene
ENSG00000174915	PTDSS2	chr11	448269	491399	rs61632362:234403:T:TTTTTG	234403	234403	0	3.45e-05	-0.69873	0.166799	-26892	Distal non-eGene
ENSG00000099849	RASSF7	chr11	560405	564021	rs138695591:466843:G:C	466843	466843	0	1.71e-06	1.22548	0.252326	-18575	Distal non-eGene
ENSG00000177042	TMEM80	chr11	695429	705028	rs7945422:695854:C:T	695854	695854	1	3.85e-16	0.841534	0.0990339	-1416	Promoter non-eGene
ENSG00000166311	SMPD1	chr11	6390432	6394998	rs2634195:6392877:A:G	6371647	6371647	0	1.9e-05	0.597985	0.138175	374792	Distal non-eGene
ENSG00000166337	TAF10	chr11	6606297	6612667	rs4758440:6626597:C:G	6605367	6605367	0	4.11e-18	-1.80745	0.198501	-130908	Distal non-eGene
ENSG00000166333	ILK	chr11	6603709	6610874	rs7395527:6723511:A:G	6702280	6702280	0	2.87e-08	-1.92626	0.340261	-205020	Distal non-eGene
ENSG00000158077	NLRP14	chr11	7020447	7071308	rs61879053:7104668:G:A	7083437	7083437	0	1.66e-07	0.678103	0.127285	155341	Distal non-eGene
ENSG00000170743	SYT9	chr11	7238779	7469042	rs111378283:7109920:G:GTAA	7088689	7088689	0	8.04e-08	-0.69735	0.127544	150089	Distal eGene
ENSG00000175390	EIF3F	chr11	7970252	8001862	rs7941782	7991903	7991903	0	1.76e-05	3.51847	0.809691	27341	Distal non-eGene
ENSG00000255420	CASC23	chr11	8011279	8016489	rs34812123:8053407:G:A	8031860	8031860	0	7.13e-06	0.311127	0.0683824	-12616	Distal non-eGene
ENSG00000166402	TUB	chr11	8019245	8106112	rs7932687:8088757:C:A	8067210	8067210	1	2.61e-05	-0.29691	0.069781	-47966	Distal eGene
ENSG00000166402	TUB	chr11	8019245	8106112	rs55774312:8126477:G:T	8104930	8104930	0	1.54e-08	-0.462418	0.0800705	-85686	Distal eGene
ENSG00000166436	TRIM66	chr11	8612038	8671866	rs35981610:8703973:G:GC	8682426	8682426	0	1.53e-44	0.885689	0.0556599	228525	Distal non-eGene
ENSG00000166441	RPL27A	chr11	8682412	8714759	rs1057198:8708939:A:C	8687392	8687392	0	2.94e-06	-6.78228	1.43007	223559	Distal non-eGene
ENSG00000254860	TMEM9B-AS1	chr11	8964676	8977527	rs34275210:8863682:G:A	8842135	8842135	1	9.51e-07	0.382618	0.0768467	68816	Distal non-eGene
ENSG00000166452	AKIP1	chr11	8911140	8920084	rs34874636:8865855:G:A	8844308	8844308	0	3.16e-12	-0.693909	0.0964859	66643	Distal non-eGene
ENSG00000175348	TMEM9B	chr11	8947295	8965011	rs4910156:8941197:T:G	8919650	8919650	2	1.14e-05	-0.316546	0.0712069	540669	Distal non-eGene
ENSG00000072952	MRVI1	chr11	10573092	10693988	rs77075621:10753685:G:C	10732138	10732138	1	1.18e-05	0.486274	0.109603	-423825	Distal non-eGene
ENSG00000246308	RP11-685M7.3	chr11	10809298	10822931	rs10840493:10827950:T:C	10806403	10806403	0	3.64e-07	0.105194	0.020334	52393	Distal non-eGene
ENSG00000184669	OR7E14P	chr11	17013999	17053024	rs4757467:17001584:T:C	16980037	16980037	1	1.03e-06	-0.339207	0.0683515	34406	Distal non-eGene
ENSG00000110700	RPS13	chr11	17074390	17077787	rs61147221:17004018:C:T	16982471	16982471	0	9.39e-09	1.66497	0.283873	31972	Distal non-eGene
ENSG00000006071	ABCC8	chr11	17392886	17476845	11:17072588:C:T	17051041	17051041	2	1.73e-06	0.894687	0.18427	-36598	Distal non-eGene
ENSG00000188211	NCR3LG1	chr11	17351727	17377341	rs74728365:17404846:A:C	17383299	17383299	1	1.12e-06	0.620371	0.125425	161117	Distal non-eGene
ENSG00000244398	RP11-466H18.1	chr11	16974694	16975013	exm2249718	17386949	17386949	0	4.09e-05	0.306907	0.0739813	157467	Distal non-eGene
ENSG00000006071	ABCC8	chr11	17392886	17476845	rs2074312	17400243	17400243	1	1.05e-12	0.542091	0.0736578	144173	Distal non-eGene
ENSG00000177054	ZDHHC13	chr11	19117100	19176422	rs4494286:19101663:T:C	19080116	19080116	0	1.42e-07	0.452623	0.0844756	270608	Distal non-eGene
ENSG00000152219	ARL14EP	chr11	30323052	30338227	rs11030998:30208516:G:A	30186969	30186969	0	3.7e-12	0.492931	0.0687761	-592674	Distal non-eGene
ENSG00000149089	APIP	chr11	34853095	34916499	rs16926448:34937698:G:A	34916151	34916151	1	7.76e-12	-0.715562	0.101465	503912	Distal non-eGene
ENSG00000149089	APIP	chr11	34853095	34916499	rs112032820:34938074:C:T	34916527	34916527	0	1e-93	1.22019	0.0446035	503536	Distal non-eGene
ENSG00000255542	RP4-683L5.1	chr11	35419058	35421002	rs112697411:35428186:G:GA	35406639	35406639	0	7.13e-06	0.225336	0.0495283	-490810	Distal non-eGene
ENSG00000166349	RAG1	chr11	36510710	36593156	rs877947:36494125:A:G	36472575	36472575	0	2.43e-07	0.356585	0.0678723	-176287	Distal non-eGene
ENSG00000148948	LRRC4C	chr11	40114204	41459773	rs998447	40289239	40289239	0	5.67e-33	0.79095	0.06028	1170534	Distal eGene
ENSG00000279675	RP11-454H19.2	chr11	40107245	40112599	rs998447	40289239	40289239	0	1.3e-14	0.535731	0.0669183	1170534	Distal non-eGene
ENSG00000151348	EXT2	chr11	44095550	44245429	rs3134912:44108220:G:T	44086670	44086670	0	1.23e-08	3.00865	0.517236	454023	Distal non-eGene
ENSG00000254427	RP11-430H10.1	chr11	45355372	45366121	rs1868910:45389464:C:T	45367913	45367913	0	3.13e-18	0.267501	0.0292639	297709	Distal non-eGene
ENSG00000134569	LRP4	chr11	46856869	46918642	rs146952358:46926058:A:G	46904507	46904507	0	2.97e-06	6.84084	1.44319	32182	Distal non-eGene
ENSG00000030066	NUP160	chr11	47778088	47848555	rs10838773:47834346:G:A	47812794	47812794	0	2.21e-13	-2.29651	0.30243	35761	Distal eGene
ENSG00000213593	TMX2	chr11	57712601	57740973	rs10896633:57424040:T:C	57656568	57656568	0	3.89e-11	3.66565	0.539335	96675	Distal non-eGene
ENSG00000110048	OSBP	chr11	59574399	59616144	rs505431:59532072:T:C	59764599	59764599	0	7.87e-06	1.86107	0.411032	-9540	Distal non-eGene
ENSG00000166927	MS4A7	chr11	60378483	60395951	rs76877532:60109677:G:A	60342204	60342204	1	5.38e-06	-0.381415	0.0827052	273532	Distal non-eGene
ENSG00000166928	MS4A14	chr11	60378531	60417756	rs2233252:60157107:T:G	60389634	60389634	0	6.93e-16	0.29602	0.0351711	226102	Distal non-eGene
ENSG00000257052	RP11-881M11.2	chr11	60906790	60909742	11:60686070:C:CT	60918598	60918598	0	7.86e-05	-0.134901	0.0338101	183797	Distal non-eGene
ENSG00000110446	SLC15A3	chr11	60937085	60952530	rs522141:60713077:G:A	60945605	60945605	0	1.75e-22	-4.24604	0.409415	156790	Distal non-eGene
ENSG00000110107	PRPF19	chr11	60890731	60906588	rs34085615:60903633:AT:A	61136161	61136162	0	2.38e-06	-1.96414	0.41029	-222287	Distal non-eGene
ENSG00000006118	TMEM132A	chr11	60924464	60937159	exm915612	61138807	61138807	1	8.88e-07	-0.674697	0.135126	-224933	Distal non-eGene
ENSG00000167987	VPS37C	chr11	61130257	61161617	rs74555568:60907886:C:T	61140414	61140414	1	3.84e-13	0.786535	0.104712	-297449	Distal non-eGene
ENSG00000279549	AP000437.3	chr11	61143381	61145464	rs74483081:60913290:G:C	61145818	61145818	0	3.96e-07	0.257961	0.0500239	-302853	Distal non-eGene
ENSG00000167987	VPS37C	chr11	61130257	61161617	rs519296	61152282	61152282	0	4.02e-51	0.996353	0.0571101	-309317	Distal non-eGene
ENSG00000110108	TMEM109	chr11	60913875	60923443	rs60905595:60924896:C:A	61157424	61157424	0	3.7e-05	-0.914764	0.219248	-243550	Distal eGene
ENSG00000110448	CD5	chr11	61102396	61127852	rs483398:60924920:T:C	61157448	61157448	0	1.71e-07	-0.483309	0.0908144	-314483	Distal non-eGene
ENSG00000256713	PGA5	chr11	61241043	61251448	rs35827276:61606500:C:T	61839028	61839028	0	2.28e-05	0.319113	0.0744447	-46048	Distal non-eGene
ENSG00000167995	BEST1	chr11	61949822	61965515	rs972355:61717337:G:C	61949865	61949865	0	7.64e-42	-7.92093	0.518561	-156885	Distal non-eGene
ENSG00000255553	RP11-810P12.5	chr11	62077278	62082184	rs35435184:61840165:C:T	62072693	62072693	0	1.71e-12	-2.51913	0.345735	-180642	Distal non-eGene
ENSG00000149503	INCENP	chr11	62123974	62153163	rs259871:61875611:G:T	62108139	62108139	0	7.07e-06	-0.703759	0.154615	-315502	Distal non-eGene
ENSG00000149480	MTA2	chr11	62593215	62601840	11:61895084:T:TA	62127612	62127612	1	9.43e-06	1.16073	0.258658	-374970	Distal non-eGene
ENSG00000149480	MTA2	chr11	62593215	62601840	rs11231155	62598147	62598147	0	1.81e-15	0.532268	0.0642543	14618	Distal non-eGene
ENSG00000089597	GANAB	chr11	62624827	62646726	rs142631389:62408401:AG:A	62640929	62640930	0	1.66e-05	-7.18771	1.64905	5797	Distal eGene
ENSG00000278615	C11orf98	chr11	62662817	62665217	rs71490397:62429581:T:A	62662109	62662109	0	1.03e-34	4.63353	0.341896	-39934	Distal non-eGene
ENSG00000255717	SNHG1	chr11	62851989	62855914	rs12225962:62628341:T:G	62860869	62860869	0	6.6e-14	9.13159	1.17507	-89566	Distal non-eGene
ENSG00000149452	SLC22A8	chr11	62989155	63015839	rs7478785:62784542:T:C	63017070	63017070	0	1.06e-12	-0.505747	0.0687226	-95263	Distal non-eGene
ENSG00000173486	FKBP2	chr11	64241004	64244132	rs55682014:63715199:G:GTT	63947727	63947727	0	8.32e-06	-1.06728	0.236364	-178952	Distal non-eGene
ENSG00000110076	NRXN2	chr11	64606175	64723188	rs34993003:64264330:AT:A	64496858	64496859	0	3.15e-06	-2.34104	0.495213	226330	Distal eGene
ENSG00000254614	AP003068.23	chr11	65177607	65181834	rs6591178:64944965:G:A	65177494	65177494	0	2.25e-39	-0.385682	0.0262628	-88170	Distal non-eGene
ENSG00000173825	TIGD3	chr11	65354768	65357613	rs116742819:65099893:A:C	65332422	65332422	0	3.29e-12	0.448728	0.0624504	-70660	Distal non-eGene
ENSG00000245532	NEAT1	chr11	65422775	65445540	rs674485	65429922	65429922	0	8.75e-22	-68.7926	6.76109	58214	Distal non-eGene
ENSG00000179292	TMEM151A	chr11	66291871	66296664	rs34898043:65478252:C:CT	65710781	65710781	0	1.7e-06	0.528237	0.108715	151245	Distal non-eGene
ENSG00000172757	CFL1	chr11	65823023	65862026	rs35189842:65584867:TA:T	65817396	65817397	0	9.03e-07	4.08718	0.819134	-105400	Distal non-eGene
ENSG00000172803	SNX32	chr11	65833642	65856896	NHGRI_notinECorHUNT_chr11_65656564	65889093	65889093	0	1.52e-33	0.859708	0.0648165	-27067	Distal non-eGene
ENSG00000175115	PACS1	chr11	66070364	66244747	rs11227439:66025679:G:A	66258208	66258208	0	9.53e-10	-4.89845	0.781669	-187845	Distal eGene
ENSG00000173715	C11orf80	chr11	66744452	66843328	rs4930384:66340116:G:A	66572645	66572645	0	6.49e-15	-0.614719	0.0758536	105276	Distal non-eGene
ENSG00000174903	RAB1B	chr11	66268534	66277492	rs60836878:66354315:A:AAT	66586844	66586844	0	5.79e-06	1.80581	0.392939	29782	Distal non-eGene
ENSG00000173156	RHOD	chr11	67056819	67072013	rs114895445:66824261:C:T	67056790	67056790	0	8.58e-13	-0.250704	0.033922	261081	Distal non-eGene
ENSG00000175544	CABP4	chr11	67452407	67460313	rs7936800:67220865:A:G	67453394	67453394	0	4.1e-05	7.35713	1.77383	-38426	Distal non-eGene
ENSG00000162341	TPCN2	chr11	69048898	69162440	rs35688294:68859672:A:AT	69092204	69092204	0	6.48e-35	-0.801603	0.0589312	-631473	Distal non-eGene
ENSG00000251143	RP11-849H4.4	chr11	72014292	72020910	rs7115200:71752160:T:G	72041114	72041114	0	7.95e-08	-0.387191	0.0707899	39217	Distal non-eGene
ENSG00000186635	ARAP1	chr11	72685070	72793599	rs1531865	72726353	72726353	0	1.99e-07	1.90129	0.359256	67246	Distal eGene
ENSG00000168010	ATG16L2	chr11	72814309	72843674	rs10898880:72525111:C:A	72814066	72814066	0	1.75e-05	0.44401	0.102131	362628	Distal non-eGene
ENSG00000054965	FAM168A	chr11	73400488	73598189	rs11606281:73307762:A:T	73596717	73596717	1	1.71e-05	0.347644	0.0798642	1472	Promoter eGene
ENSG00000021300	PLEKHB1	chr11	73646179	73662819	rs11235826:73342259:G:A	73631214	73631214	0	8.84e-15	-61.3096	7.60643	14964	Distal eGene
ENSG00000149273	RPS3	chr11	75399487	75422280	rs3133187	75399545	75399545	0	9.53e-24	-31.4973	2.93809	126358	Distal non-eGene
ENSG00000149243	KLHL35	chr11	75422395	75430629	rs570454:75144044:T:G	75432999	75432999	0	1.25e-12	-0.469238	0.0639875	92904	Distal non-eGene
ENSG00000137474	MYO7A	chr11	77128265	77215239	rs113813737:76843513:T:TTTTG	77132467	77132467	0	3.55e-15	1.38241	0.168811	-4203	Distal eGene
ENSG00000137474	MYO7A	chr11	77128265	77215239	rs1893759:76894949:T:C	77183904	77183904	1	2.73e-12	0.489955	0.0679128	-55640	Distal eGene
ENSG00000137500	CCDC90B	chr11	83259098	83286407	rs481778:82944624:G:A	83233582	83233582	0	3.97e-06	1.01188	0.216306	2394340	Distal non-eGene
ENSG00000171204	TMEM126B	chr11	85628574	85636539	rs575050:85339542:G:T	85628498	85628498	0	3.13e-07	-0.993171	0.190872	57779	Distal non-eGene
ENSG00000179071	CCDC89	chr11	85684867	85686277	rs2467059:85398998:C:T	85687955	85687955	1	7.8e-05	0.308977	0.0774042	-60033	Distal non-eGene
ENSG00000074266	EED	chr11	86244545	86278813	rs111680005:85747949:G:C	86036907	86036907	2	4.42e-05	-0.852092	0.206332	156575	Distal non-eGene
ENSG00000149196	HIKESHI	chr11	86302212	86345931	rs2167611:86005113:T:A	86294071	86294071	0	6.39e-06	-1.59171	0.348009	-438970	Distal non-eGene
ENSG00000174804	FZD4	chr11	86945680	86955391	rs56870133:86667781:G:GGT	86956739	86956739	0	1.01e-08	-0.523559	0.089471	81105	Distal non-eGene
ENSG00000123892	RAB38	chr11	88113243	88175467	rs10831523	88013627	88013627	1	9.95e-12	-0.554635	0.0790836	1052318	Distal non-eGene
ENSG00000263465	SRSF8	chr11	95067198	95071224	rs620767	95074097	95074097	0	2.21e-09	1.39806	0.228394	1315892	Distal non-eGene
ENSG00000183340	JRKL	chr11	96389990	96507574	rs11021555:96100955:T:C	96367791	96367791	0	9.16e-09	-1.263	0.215172	-442476	Distal non-eGene
ENSG00000149231	CCDC82	chr11	96352770	96389923	rs11021568:96121855:C:T	96388691	96388691	0	3.1e-54	17.3641	0.95592	-598726	Distal non-eGene
ENSG00000152558	TMEM123	chr11	102396333	102470384	rs12794864:102215403:T:A	102344672	102344672	0	2.63e-11	2.54737	0.371372	122583	Distal non-eGene
ENSG00000110675	ELMOD1	chr11	107591092	107666779	rs12363338:107559258:T:A	107688532	107688532	2	1.61e-05	0.306203	0.0701244	-122786	Distal non-eGene
ENSG00000137714	FDX1	chr11	110429884	110464881	rs149134714:110360850:TG:T	110490126	110490127	0	1.62e-08	0.742412	0.128754	965504	Distal non-eGene
ENSG00000150764	DIXDC1	chr11	111927145	112022584	rs5794769:111800488:A:AT	111929764	111929764	0	7.34e-10	4.29198	0.680052	-2620	Distal eGene
ENSG00000109846	CRYAB	chr11	111908566	111923722	rs5794769:111800488:A:AT	111929764	111929764	0	5.36e-13	-51.9768	6.96603	-50339	Distal non-eGene
ENSG00000149292	TTC12	chr11	113314530	113383544	rs3897583:113160199:C:T	113289477	113289477	1	3.51e-34	-0.857922	0.0639223	-1202704	Distal non-eGene
ENSG00000270179	RP11-159N11.4	chr11	113368479	113369117	rs3897583:113160199:C:T	113289477	113289477	1	8.8e-08	-0.404694	0.0742504	-1202704	Distal non-eGene
ENSG00000086827	ZW10	chr11	113733188	113773811	rs111904401:113598293:T:C	113727571	113727571	0	2.6e-06	-0.796599	0.167059	-413134	Distal non-eGene
ENSG00000109917	ZPR1	chr11	116773800	116788050	rs140489004:117496924:CTCCT:C	117626209	117626213	1	2.08e-05	-0.328496	0.0762667	191316	Distal non-eGene
ENSG00000243431	RPL5P30	chr11	118560691	118561580	rs499189:118357614:T:A	118486899	118486899	0	4.17e-09	-0.302528	0.0503383	-261805	Distal non-eGene
ENSG00000137700	SLC37A4	chr11	119024115	119030906	rs12280288:118892940:T:C	119022230	119022230	0	1.78e-06	2.73373	0.563773	34972	Distal non-eGene
ENSG00000196655	TRAPPC4	chr11	119018433	119025454	rs7127188:118893023:A:C	119022313	119022313	0	2.52e-38	3.6584	0.253476	34889	Distal non-eGene
ENSG00000186166	CCDC84	chr11	118998143	119015791	rs11006:118895202:A:G	119024492	119024492	0	1.57e-07	2.02239	0.378816	32710	Distal non-eGene
ENSG00000172273	HINFP	chr11	119121588	119136044	rs139628173:119012657:A:AAT	119141947	119141947	0	1.19e-05	-1.92119	0.433189	64329	Distal non-eGene
ENSG00000172375	C2CD2L	chr11	119102199	119118544	rs668033:119023107:A:C	119152397	119152397	0	7.32e-13	-2.48831	0.335592	53879	Distal non-eGene
ENSG00000196914	ARHGEF12	chr11	120336915	120489936	rs73008718:120205856:T:C	120335147	120335147	0	3.12e-06	6.52824	1.38033	1767	Promoter eGene
ENSG00000023171	GRAMD1B	chr11	123358429	123627774	rs35378274:123386481:C:CT	123515773	123515773	1	5.32e-07	0.399206	0.0783142	-157345	Distal eGene
ENSG00000023171	GRAMD1B	chr11	123358429	123627774	rs2846310:123397869:G:A	123527161	123527161	0	1.01e-12	-0.552652	0.0750354	-168733	Distal eGene
ENSG00000110074	FOXRED1	chr11	126269056	126278131	11:126084300:TTC:T	126214405	126214407	0	5.51e-17	1.62925	0.185962	-275489	Distal non-eGene
ENSG00000255455	RP11-890B15.3	chr11	130866255	130870247	rs10160760:130742812:G:A	130872917	130872917	1	1.03e-10	1.04394	0.15726	-443924	Distal non-eGene
ENSG00000182667	NTM	chr11	131370479	132336822	rs10791142:131245391:A:T	131375496	131375496	0	9.89e-13	-6.64873	0.902235	-5018	Distal eGene
ENSG00000254648	RP11-713P17.4	chr11	134035833	134037107	rs879601:133907345:G:T	134037450	134037450	0	1.13e-06	-0.258604	0.0523175	31475	Distal non-eGene
ENSG00000236908	RP5-1063M23.2	chr12	3318719	3325343	rs6489453:3407924:G:A	3298758	3298758	0	8.3e-31	-0.407456	0.0323978	466061	Distal non-eGene
ENSG00000111224	PARP11	chr12	3791048	3873448	rs34818389:3918186:CT:C	3809020	3809021	0	2.13e-06	-0.476153	0.0989635	-442898	Distal non-eGene
ENSG00000111224	PARP11	chr12	3791048	3873448	rs8181613:3989090:C:A	3879924	3879924	1	3.96e-05	-0.379246	0.0912486	393848	Distal non-eGene
ENSG00000078237	TIGAR	chr12	4307764	4354593	rs10774216	4313737	4313737	0	1.08e-06	0.36505	0.0736912	224771	Distal non-eGene
ENSG00000010610	CD4	chr12	6786859	6820808	rs1045261:6929637:T:C	6820471	6820471	0	1.08e-05	-2.52993	0.567571	-96730	Distal non-eGene
ENSG00000110811	P3H3	chr12	6828411	6839851	rs4963510:6946545:C:A	6837381	6837381	0	8.45e-22	-3.59741	0.353412	-69906	Distal non-eGene
ENSG00000111674	ENO2	chr12	6913746	6923698	rs76214301:6955865:C:CCACA	6846701	6846701	1	1.84e-06	-0.354349	0.0731916	20418	Distal non-eGene
ENSG00000111669	TPI1	chr12	6867120	6870948	rs12302749	6867132	6867132	0	2.07e-20	57.2556	5.85269	57331	Distal non-eGene
ENSG00000111676	ATN1	chr12	6924464	6942321	rs35469589:7042372:C:T	6933209	6933209	0	8.52e-19	-0.656812	0.0705487	-66090	Distal non-eGene
ENSG00000255836	RP11-157G21.2	chr12	7438781	7439990	rs12426210:7609781:A:G	7457185	7457185	1	2.02e-08	-0.601831	0.105112	-268500	Distal non-eGene
ENSG00000215241	RP11-266K4.9	chr12	8235416	8242564	rs150940069:8156439:T:C	8003843	8003843	0	1.82e-05	0.65017	0.149863	-112695	Distal non-eGene
ENSG00000134539	KLRD1	chr12	10226059	10329600	rs4326887:10375888:T:G	10223289	10223289	0	5.65e-49	-2.01026	0.118612	500023	Distal non-eGene
ENSG00000139112	GABARAPL1	chr12	10212459	10223130	rs10845079:10392279:T:C	10239680	10239680	0	3.44e-13	0.776992	0.103215	313683	Distal non-eGene
ENSG00000139112	GABARAPL1	chr12	10212459	10223130	rs6488303:10701983:G:A	10549384	10549384	2	2.09e-05	0.300526	0.0697819	-336926	Distal eGene
ENSG00000213809	KLRK1	chr12	10372354	10391874	rs59007580:10711474:T:C	10558875	10558875	0	8.23e-29	0.439158	0.0363974	-332817	Distal non-eGene
ENSG00000134545	KLRC1	chr12	10442265	10454685	rs59007580:10711474:T:C	10558875	10558875	0	4e-23	0.437278	0.0414522	-332817	Distal non-eGene
ENSG00000060138	YBX3	chr12	10699090	10723312	rs12423741:10872827:A:G	10720228	10720228	2	3.72e-06	0.591623	0.126096	-507770	Distal non-eGene
ENSG00000178878	APOLD1	chr12	12725918	12829975	rs11055030:12878349:G:C	12725415	12725415	0	7.02e-07	-2.86752	0.568823	-368336	Distal non-eGene
ENSG00000023734	STRAP	chr12	15882392	15903478	rs11056538:15669113:A:G	15516179	15516179	0	3.53e-05	-3.10796	0.742871	-167504	Distal non-eGene
ENSG00000060982	BCAT1	chr12	24810023	24949459	rs148522197:24976152:ATTTGTTTGTTTG:A	24823218	24823230	1	4.49e-07	0.36647	0.0714155	-1571719	Distal non-eGene
ENSG00000133703	KRAS	chr12	25204790	25250936	rs71448100:25146593:T:A	24993659	24993659	0	2.78e-08	3.15646	0.557	201503	Distal non-eGene
ENSG00000118308	LRMP	chr12	25004343	25108334	rs699032:25151127:T:C	24998193	24998193	0	9.6e-27	1.87227	0.16244	196969	Distal non-eGene
ENSG00000275476	RP11-996F15.4	chr12	29277398	29277882	rs10843390:29496991:C:T	29344058	29344058	0	4.94e-37	0.45921	0.0325217	-7401529	Distal non-eGene
ENSG00000110888	CAPRIN2	chr12	30709553	30754951	rs11610452:30905152:G:A	30752218	30752218	0	1.55e-15	-0.619463	0.0745893	-56232	Distal non-eGene
ENSG00000110888	CAPRIN2	chr12	30709553	30754951	rs1485345:30907740:T:G	30754806	30754806	1	8.33e-10	-0.692988	0.110179	-58820	Distal non-eGene
ENSG00000170456	DENND5B	chr12	31382224	31591097	rs12423226:31759822:G:A	31606888	31606888	0	1.5e-05	-3.10212	0.707907	-15791	Distal eGene
ENSG00000174718	KIAA1551	chr12	31959371	31993107	rs12370315:32112292:G:C	31959358	31959358	1	1.36e-10	0.45978	0.0697305	-230184	Distal non-eGene
ENSG00000225342	AC079630.4	chr12	40186010	40224915	rs4768300:41017908:T:G	40624106	40624106	0	2.58e-05	0.0995794	0.0233927	68336	Distal non-eGene
ENSG00000018236	CNTN1	chr12	40692443	41072418	rs7974939:41080495:T:C	40686693	40686693	0	1.26e-09	4.17473	0.671306	5749	Distal eGene
ENSG00000184613	NELL2	chr12	44508276	44921848	rs12308701	44408139	44408139	1	3.35e-07	0.541618	0.104365	513709	Distal eGene
ENSG00000139211	AMIGO2	chr12	47075708	47079951	rs75354759:48170805:A:G	47777022	47777022	0	3.91e-05	10.5674	2.54079	-70961	Distal non-eGene
ENSG00000268069	RP5-1057I20.4	chr12	47784924	47786002	rs4760742:48172058:A:G	47778275	47778275	0	8.97e-06	0.154518	0.0343487	-72214	Distal non-eGene
ENSG00000211584	SLC48A1	chr12	47753917	47782753	rs3759408:48173221:A:G	47779438	47779438	0	8.78e-07	-1.102	0.220604	-73377	Distal non-eGene
ENSG00000139620	KANSL2	chr12	48653402	48682238	rs7979508:49018384:A:G	48624601	48624601	0	8.24e-26	-0.737552	0.0653966	-443388	Distal non-eGene
ENSG00000167553	TUBA1C	chr12	49188737	49274603	rs1476138:49525380:A:G	49131597	49131597	0	4.44e-17	1.19237	0.135649	57139	Distal eGene
ENSG00000086159	AQP6	chr12	49967195	49977139	rs3759129:50354437:A:C	49960654	49960654	0	2.45e-13	-0.188381	0.0248588	96894	Distal non-eGene
ENSG00000066117	SMARCD1	chr12	50084973	50100712	rs11169270:50483032:G:A	50089249	50089249	0	7.49e-13	1.92529	0.259785	22948	Distal non-eGene
ENSG00000123268	ATF1	chr12	50763711	50821122	rs1613835:51205066:C:T	50811283	50811283	0	3.12e-12	-0.934663	0.129931	535396	Distal non-eGene
ENSG00000050438	SLC4A8	chr12	51391318	51515763	rs36051030:51810885:CA:C	51417101	51417102	0	1.68e-07	7.45368	1.39949	397942	Distal non-eGene
ENSG00000139626	ITGB7	chr12	53191319	53207307	exm1008016	53211761	53211761	0	1.08e-05	0.349277	0.0783558	39490	Distal non-eGene
ENSG00000182544	MFSD5	chr12	53251252	53254405	rs11342988:53637336:TA:T	53243552	53243553	1	8.27e-09	0.411086	0.0698174	-10572	Distal non-eGene
ENSG00000182544	MFSD5	chr12	53251252	53254405	rs148152366:53645921:C:T	53252137	53252137	0	2.67e-16	1.33509	0.156201	-19157	Distal non-eGene
ENSG00000283536	RP11-624J6.2	chr12	53241890	53245134	rs56297209:53646327:G:C	53252543	53252543	0	5.7e-08	1.49667	0.270512	-19563	Distal non-eGene
ENSG00000135390	ATP5G2	chr12	53632727	53677408	rs3892761:54070445:A:T	53676661	53676661	0	5.95e-84	17.979	0.718296	-50682	Distal non-eGene
ENSG00000166888	STAT6	chr12	57095409	57132139	rs324014:57510309:T:C	57116526	57116526	0	1.03e-07	0.935179	0.172551	-28463	Distal non-eGene
ENSG00000182379	NXPH4	chr12	57216796	57226449	rs10876967:57570593:G:A	57176810	57176810	0	3.08e-10	-1.28252	0.198606	-44671	Distal non-eGene
ENSG00000135452	TSPAN31	chr12	57738014	57750211	rs903067:58011857:G:A	57618074	57618074	0	4.6e-05	-1.14028	0.276745	-68076	Distal non-eGene
ENSG00000257354	RP11-631N16.2	chr12	62602753	62622213	rs35168986:63001068:AT:A	62607288	62607289	0	1.51e-15	-0.548565	0.0660227	327749	Distal non-eGene
ENSG00000255642	PABPC1P4	chr12	63822022	63823895	rs56296546:64211335:A:AG	63817555	63817555	0	2.91e-14	0.263156	0.0333542	404782	Distal non-eGene
ENSG00000127337	YEATS4	chr12	69359704	69390796	rs7136238:69752509:G:T	69358729	69358729	0	5.76e-18	-0.602085	0.0664481	111620	Distal non-eGene
ENSG00000067798	NAV3	chr12	77324642	78213008	rs11115371:77179170:G:A	76785390	76785390	1	3e-05	-1.2604	0.298515	-223096	Distal non-eGene
ENSG00000258302	RP11-981P6.1	chr12	89561130	89594878	rs145187641:89857204:T:TCA	89463427	89463427	0	4.25e-19	0.400223	0.0425785	-1321211	Distal non-eGene
ENSG00000257594	GALNT4	chr12	89519409	89524806	rs34404733:89863655:AT:A	89469878	89469879	0	8.17e-10	-0.487156	0.0774132	-1327662	Distal non-eGene
ENSG00000111647	UHRF1BP1L	chr12	100028456	100142848	rs11110286:100592582:C:A	100198804	100198804	0	8.31e-10	-2.41308	0.383638	68275	Distal non-eGene
ENSG00000120805	ARL1	chr12	101393121	101407820	rs35280515:101816021:GA:G	101422243	101422244	0	9e-15	3.71164	0.460627	408695	Distal non-eGene
ENSG00000111666	CHPT1	chr12	101696948	101744140	rs2559854	101696468	101696468	0	1.07e-47	0.904916	0.0543473	-288648	Distal non-eGene
ENSG00000136048	DRAM1	chr12	101877352	102012130	rs12303474:102305935:A:G	101912157	101912157	0	3.17e-07	-0.335453	0.0644993	912242	Distal non-eGene
ENSG00000171759	PAH	chr12	102836886	102958410	rs11442766:103344728:G:GT	102950950	102950950	0	1e-09	0.894049	0.142855	545060	Distal non-eGene
ENSG00000166598	HSP90B1	chr12	103930108	103953645	rs74375989:104326939:AC:A	103933161	103933162	0	7.48e-08	-23.0218	4.20015	-3054	Distal eGene
ENSG00000204954	C12orf73	chr12	103950203	103965708	rs11111852:104331904:G:A	103938126	103938126	0	3.8e-07	0.353773	0.0684962	-8019	Distal non-eGene
ENSG00000120837	NFYB	chr12	104117078	104138289	rs73390481:104457168:T:C	104063390	104063390	0	3.92e-07	2.4708	0.478981	74899	Distal eGene
ENSG00000255150	EID3	chr12	104303740	104305205	rs7299866:104576197:G:A	104182419	104182419	0	1.83e-05	-0.515526	0.118864	803891	Distal non-eGene
ENSG00000136051	KIAA1033	chr12	105107325	105169134	rs112558374:105461009:A:G	105067231	105067231	2	1.45e-07	-0.411207	0.0768083	-851452	Distal non-eGene
ENSG00000136051	KIAA1033	chr12	105107325	105169134	rs11112371:105499021:T:C	105105243	105105243	1	1.4e-11	0.844987	0.121412	-889464	Distal non-eGene
ENSG00000120832	MTERF2	chr12	106977292	106987166	rs141575696:107608272:A:G	107214494	107214494	0	1.4e-06	5.4694	1.1164	103919	Distal non-eGene
ENSG00000136045	PWP1	chr12	107685733	107713167	rs4964607	107679918	107679918	0	3.1e-10	1.41438	0.219055	201324	Distal non-eGene
ENSG00000075856	SART3	chr12	108522581	108561400	rs888549:108962398:C:G	108568622	108568622	0	5.75e-09	2.41474	0.40563	454467	Distal non-eGene
ENSG00000110880	CORO1C	chr12	108645110	108731596	rs58845281:109112145:GA:G	108718369	108718370	0	7.38e-07	-1.38444	0.275189	13227	Distal eGene
ENSG00000110887	DAO	chr12	108858933	108901043	rs7980427:109281310:G:A	108887534	108887534	0	2.61e-22	-1.2527	0.121355	-29944	Distal non-eGene
ENSG00000135093	USP30	chr12	109023090	109088026	rs35837643:109505085:AT:A	109067280	109067281	0	7.03e-36	4.34319	0.313837	-505880	Distal non-eGene
ENSG00000110906	KCTD10	chr12	109448657	109477544	rs73194247:109873255:T:C	109435450	109435450	1	1.6e-09	-0.898983	0.145535	445038	Distal non-eGene
ENSG00000110906	KCTD10	chr12	109448657	109477544	rs11611012:109945203:G:A	109507398	109507398	0	3.87e-40	1.10652	0.0744199	-29854	Distal eGene
ENSG00000151148	UBE3B	chr12	109477403	109536705	rs75507630:109975290:A:G	109537485	109537485	0	1.66e-11	5.5195	0.796148	176743	Distal non-eGene
ENSG00000110906	KCTD10	chr12	109448657	109477544	rs73404412:110014632:C:T	109576827	109576827	2	7.32e-07	0.68942	0.136994	-3572	Distal non-eGene
ENSG00000110921	MVK	chr12	109573256	109598117	rs10774779:110016952:T:A	109579147	109579147	0	2.37e-06	0.823923	0.172055	-5892	Distal eGene
ENSG00000139428	MMAB	chr12	109553738	109573874	rs11609896	109600649	109600649	0	2.59e-14	-0.936767	0.118482	113579	Distal non-eGene
ENSG00000196850	PPTC7	chr12	110533246	110583320	rs4310669:110118995:T:C	109681190	109681190	0	9.06e-06	2.45678	0.546376	-107935	Distal non-eGene
ENSG00000139433	GLTP	chr12	109850944	109880488	rs34869730:110304731:AT:A	109866926	109866927	0	2.67e-11	-0.666479	0.0972005	-519023	Distal non-eGene
ENSG00000204856	FAM216A	chr12	110468365	110490385	rs7963121:111243912:G:A	110806108	110806108	0	8.74e-06	-0.615106	0.136553	-806922	Distal non-eGene
ENSG00000122986	HVCN1	chr12	110627842	110704950	rs7966257:111251437:G:C	110813633	110813633	0	5.03e-05	-0.308684	0.0753078	-345269	Distal non-eGene
ENSG00000089234	BRAP	chr12	111642147	111685986	rs76513313:111401242:G:A	110963438	110963438	0	7.76e-05	-1.94177	0.486299	70586	Distal non-eGene
ENSG00000111275	ALDH2	chr12	111766888	111817529	rs6490037:111713671:G:C	111275867	111275867	1	1.8e-06	-0.478227	0.098684	-339282	Distal non-eGene
ENSG00000111252	SH2B3	chr12	111405949	111451623	rs2073950	111456268	111456268	0	3.19e-50	-3.06594	0.177861	-86986	Distal non-eGene
ENSG00000229186	ADAM1A	chr12	111899264	111901391	rs35524293:112497614:G:GT	112059810	112059810	1	0.000197601	-0.41795	0.111251	49212	Distal non-eGene
ENSG00000089022	MAPKAPK5	chr12	111841979	111902238	rs61309313:112544195:T:TA	112106391	112106391	0	3.32e-25	-5.41332	0.486986	-420335	Distal non-eGene
ENSG00000135144	DTX1	chr12	113056710	113098028	rs74980798:113275063:C:A	112837258	112837258	1	4.99e-05	-0.57573	0.140393	2802476	Distal non-eGene
ENSG00000139410	SDSL	chr12	113422238	113438276	rs3890310:113854309:C:T	113416504	113416504	0	1.45e-09	1.13758	0.183659	549867	Distal non-eGene
ENSG00000139405	RITA1	chr12	113185527	113192368	rs112953804:114327476:AAC:A	113889671	113889673	1	5.32e-06	0.347965	0.0754099	-417391	Distal non-eGene
ENSG00000258102	MAP1LC3B2	chr12	116548106	116576448	rs112608219:116602950:A:G	116165145	116165145	0	3.29e-05	0.409383	0.0974775	112193	Distal non-eGene
ENSG00000176871	WSB2	chr12	118032695	118062430	rs145786929:118486387:CA:C	118048582	118048583	0	7.61e-06	2.19619	0.48425	-79599	Distal non-eGene
ENSG00000176834	VSIG10	chr12	118063594	118136026	rs200606908:118645134:GA:G	118207329	118207330	0	3.19e-05	0.97993	0.232892	165616	Distal non-eGene
ENSG00000089220	PEBP1	chr12	118135859	118145584	rs138948268:118652551:CTT:C	118214746	118214748	0	8.16e-15	-11.9419	1.4795	158199	Distal non-eGene
ENSG00000275759	RP11-131L12.3	chr12	118428282	118428870	12:118722814:T:TA	118285009	118285009	1	8.92e-06	-0.456538	0.101457	87936	Distal non-eGene
ENSG00000111707	SUDS3	chr12	118376381	118418031	rs17512644:118797768:G:A	118359963	118359963	0	3.12e-19	4.06483	0.430638	12982	Distal non-eGene
ENSG00000275759	RP11-131L12.3	chr12	118428282	118428870	rs6490178	118448517	118448517	0	6.21e-07	-0.371681	0.0733671	886195	Distal non-eGene
ENSG00000111725	PRKAB1	chr12	119667754	119681630	rs11064881:120146925:G:A	119709120	119709120	1	2.74e-05	0.594889	0.140193	168171	Distal non-eGene
ENSG00000135127	BICDL1	chr12	119989870	120094494	rs11340414:120510171:TA:T	120072367	120072368	0	1.88e-05	-9.02031	2.08296	-82498	Distal eGene
ENSG00000277283	RP1-267D11.6	chr12	120116908	120119000	rs10732609:120543406:G:A	120105602	120105602	0	6.17e-11	-0.558294	0.083051	-115733	Distal non-eGene
ENSG00000089154	GCN1	chr12	120127204	120194710	rs35885269:120618794:C:CA	120180991	120180991	0	6.06e-10	2.85044	0.449338	13719	Distal eGene
ENSG00000135097	MSI1	chr12	120341331	120369180	rs117917450:120738915:T:C	120301112	120301112	0	3.82e-07	23.237	4.50017	136978	Distal non-eGene
ENSG00000239881	RPS27P25	chr12	120369441	120371688	rs1183783:120786167:A:G	120348364	120348364	0	3.37e-10	0.427235	0.0663119	89726	Distal non-eGene
ENSG00000088986	DYNLL1	chr12	120469851	120498493	rs77880511:120867408:G:A	120429605	120429605	0	2.35e-07	8.04463	1.52945	-101816	Distal non-eGene
ENSG00000110871	COQ5	chr12	120503275	120534434	rs7957424:120894318:G:A	120456515	120456515	0	3.29e-06	0.644692	0.136632	77919	Distal eGene
ENSG00000111786	SRSF9	chr12	120461669	120469793	rs16660:120900933:C:CTGG	120463130	120463130	0	5.97e-25	-5.30226	0.479956	-135341	Distal non-eGene
ENSG00000257218	GATC	chr12	120446439	120463749	rs113401649:120903047:ATCT:A	120465244	120465247	1	6e-06	0.589723	0.128539	-137455	Distal non-eGene
ENSG00000122971	ACADS	chr12	120725736	120740008	rs10610658:121144245:TA:T	120706442	120706443	0	1.27e-08	0.183113	0.0315158	-65890	Distal non-eGene
ENSG00000157895	C12orf43	chr12	121000487	121016502	rs73214155:121454342:T:A	121016539	121016539	0	6.98e-15	1.19121	0.147175	-546689	Distal non-eGene
ENSG00000089053	ANAPC5	chr12	121308246	121399896	rs11065527:121781013:A:T	121343210	121343210	0	1.66e-06	-0.434661	0.0893747	56831	Distal non-eGene
ENSG00000170633	RNF34	chr12	121400042	121430623	rs375267070:121872294:ACTCT:A	121434491	121434495	0	4.66e-05	1.59409	0.387203	-34595	Distal non-eGene
ENSG00000089094	KDM2B	chr12	121429098	121581015	rs10849886:121886921:G:T	121449118	121449118	0	3.5e-08	-1.13827	0.202394	-49222	Distal non-eGene
ENSG00000256008	RP11-728G15.1	chr12	120629612	120641591	rs80272996:121994892:G:A	121556987	121556987	0	1.93e-06	0.365241	0.0755947	24028	Distal non-eGene
ENSG00000276045	ORAI1	chr12	121626551	121642677	rs111232801:122098321:G:A	121660415	121660415	0	1.64e-06	-0.208177	0.0427768	-79400	Distal non-eGene
ENSG00000188735	TMEM120B	chr12	121712753	121783001	rs71079089:122174071:T:TTTTA	121736165	121736165	0	8.42e-15	2.28585	0.283353	-23413	Distal eGene
ENSG00000139725	RHOF	chr12	121777755	121803403	rs1168663:122234089:T:A	121796183	121796183	0	3.95e-14	0.814172	0.103772	7997	Distal non-eGene
ENSG00000256304	CCDC150P1	chr12	122322123	122324336	rs3970383:122283448:A:G	121845542	121845542	2	2.58e-05	-0.322877	0.0758372	18054	Distal non-eGene
ENSG00000130783	CCDC62	chr12	122774328	122827528	12:123236748:A:AGAAG	122752201	122752201	0	2.06e-06	-0.876429	0.181919	-118071	Distal non-eGene
ENSG00000235423	RP11-282O18.3	chr12	123252031	123261483	rs940904	123007025	123007025	0	3.88e-05	0.190477	0.0457772	236989	Distal non-eGene
ENSG00000150967	ABCB9	chr12	122920952	122981649	rs59131741:123536456:C:CT	123051909	123051909	0	2.34e-06	-0.51969	0.108476	98106	Distal non-eGene
ENSG00000051825	MPHOSPH9	chr12	123152321	123244014	rs1727294:123616514:A:G	123131967	123131967	0	5.88e-52	-6.37884	0.361627	18048	Distal non-eGene
ENSG00000256092	RP13-942N8.1	chr12	123363869	123366113	rs112223429:123849523:C:T	123364976	123364976	0	1.22e-08	1.67661	0.288169	18797	Distal non-eGene
ENSG00000139697	SBNO1	chr12	123289110	123364843	rs76764252:123851908:T:G	123367361	123367361	1	2.95e-07	-0.717225	0.137523	16412	Distal non-eGene
ENSG00000111364	DDX55	chr12	123602078	123620941	rs7309150:124053413:C:T	123568866	123568866	1	9.91e-15	-2.00739	0.24955	-307383	Distal non-eGene
ENSG00000111364	DDX55	chr12	123602078	123620941	rs76100851:124067280:G:T	123582733	123582733	0	5.48e-25	-1.05862	0.0957395	-310399	Distal non-eGene
ENSG00000111358	GTF2H3	chr12	123633740	123662606	rs7953876:124070843:T:C	123586296	123586296	0	6.9e-08	-0.867506	0.157823	-353380	Distal non-eGene
ENSG00000086598	TMED2	chr12	123584532	123598577	rs11057305:124095447:G:T	123610900	123610900	0	1.66e-07	2.08748	0.391804	-246057	Distal non-eGene
ENSG00000168778	TCTN2	chr12	123671114	123708403	rs77724571:124187185:G:A	123702638	123702638	1	1.39e-20	-1.3649	0.138809	269207	Distal non-eGene
ENSG00000168778	TCTN2	chr12	123671114	123708403	rs112588511:124192587:T:TCTCA	123708040	123708040	0	1.71e-56	0.934541	0.0500167	263805	Distal non-eGene
ENSG00000250091	DNAH10OS	chr12	123926425	123934984	rs7980142:125219121:T:C	124734575	124734575	0	6.75e-06	0.691074	0.151493	-761334	Distal non-eGene
ENSG00000279905	RP11-117L5.1	chr12	130425005	130430661	rs12826492:130886140:G:C	130401595	130401595	0	7.68e-13	1.2194	0.164618	437671	Distal non-eGene
ENSG00000279905	RP11-117L5.1	chr12	130425005	130430661	rs7304899	130409043	130409043	1	1.64e-12	0.51453	0.0705612	367503	Distal non-eGene
ENSG00000060709	RIMBP2	chr12	130396138	130517917	rs750047:131121494:C:T	130636949	130636949	0	4.14e-07	-3.08102	0.598526	79332	Distal non-eGene
ENSG00000184967	NOC4L	chr12	132144449	132152473	rs150892313:132567917:G:A	132083372	132083372	0	2.86e-05	0.742842	0.175489	-133452	Distal non-eGene
ENSG00000274373	RP13-714J12.1	chr12	132424505	132425208	rs10870577:133011957:G:A	132435371	132435371	0	3.53e-23	-0.724414	0.068575	54180	Distal non-eGene
ENSG00000256875	RP11-503G7.2	chr12	132462243	132462856	rs11147042:133036863:C:T	132460277	132460277	1	1.21e-05	0.348008	0.0785378	-35069	Distal non-eGene
ENSG00000256875	RP11-503G7.2	chr12	132462243	132462856	exm-rs10747083	132465032	132465032	0	5.55e-24	-0.751802	0.0697104	-39824	Distal non-eGene
ENSG00000274373	RP13-714J12.1	chr12	132424505	132425208	rs12309362:133043033:G:A	132466447	132466447	1	4.5e-06	-0.358567	0.0771	-41239	Distal eGene
ENSG00000279700	RP13-554M15.2	chr12	132565072	132566425	12:133141038:G:GCCTGGTGAGCCTCCTGGCTCTGGGAGGGCCCCTGCCTTACTC	132564452	132564452	0	1.98e-05	-0.384971	0.0891457	-480169	Distal non-eGene
ENSG00000247077	PGAM5	chr12	132710820	132722734	rs11146975:133194786:T:C	132618200	132618200	0	2.63e-08	0.639806	0.112696	-473752	Distal non-eGene
ENSG00000176894	PXMP2	chr12	132687607	132704991	rs5744962:133216177:A:G	132639591	132639591	0	5.29e-06	0.306398	0.0663873	-214383	Distal non-eGene
ENSG00000176915	ANKLE2	chr12	132725504	132761888	rs61951281:133319214:G:C	132742628	132742628	0	3.04e-55	0.976324	0.0530697	19260	Distal eGene
ENSG00000176915	ANKLE2	chr12	132725504	132761888	rs78408032:133336372:C:T	132759786	132759786	1	2.11e-05	0.393989	0.0915376	2102	Promoter eGene
ENSG00000090615	GOLGA3	chr12	132768910	132828858	rs61952781:133412428:A:G	132835842	132835842	0	1.29e-22	-31.2198	2.9996	-6984	Distal eGene
ENSG00000072609	CHFR	chr12	132822188	132956304	rs61952781:133412428:A:G	132835842	132835842	0	2.13e-10	0.562763	0.086331	-6984	Distal non-eGene
ENSG00000250790	RP11-46H11.3	chr12	132911471	132914732	rs72624274:133414251:C:T	132837665	132837665	0	4.21e-10	0.410011	0.0640106	-8807	Distal non-eGene
ENSG00000072609	CHFR	chr12	132822188	132956304	rs140117476:133465870:C:CA	132889284	132889284	1	3.93e-08	-0.400693	0.0715172	-60426	Distal non-eGene
ENSG00000238286	SLC35E1P1	chr13	20607269	20608131	rs9506514:21131211:C:A	20557072	20557072	1	1.2e-07	-0.386971	0.0717858	9997	Distal non-eGene
ENSG00000127863	TNFRSF19	chr13	23570371	23676104	rs111526441:24153369:A:T	23579230	23579230	0	1.4e-07	-2.92047	0.544765	310189	Distal non-eGene
ENSG00000132964	CDK8	chr13	26254105	26405238	rs11617826:26780441:C:T	26206304	26206304	0	9.27e-23	-2.08663	0.199721	351399	Distal non-eGene
ENSG00000127870	RNF6	chr13	26132116	26222493	rs56875324:26781053:TA:T	26206916	26206917	0	4.9e-13	-4.01332	0.536897	350787	Distal non-eGene
ENSG00000132970	WASF3	chr13	26557704	26688948	rs541202:27138389:A:G	26564252	26564252	1	4.97e-07	0.411463	0.0805041	-6549	Distal eGene
ENSG00000139517	LNX2	chr13	27545912	27620404	rs71433219:27949078:T:A	27374941	27374941	0	3.96e-05	1.92935	0.464196	-382945	Distal non-eGene
ENSG00000122034	GTF3A	chr13	27424545	27435823	rs2146819:27997305:C:T	27423168	27423168	0	8.71e-10	-1.28287	0.204212	27423	Distal non-eGene
ENSG00000122033	MTIF3	chr13	27435644	27450591	rs1007701:28049143:C:G	27475006	27475006	0	8.5e-11	-2.02933	0.304242	353757	Distal non-eGene
ENSG00000139508	SLC46A3	chr13	28700065	28718970	rs66964313:29294042:G:C	28719905	28719905	0	3.61e-59	1.05592	0.0547136	-60801	Distal non-eGene
ENSG00000139514	SLC7A1	chr13	29509411	29595688	rs75843331:30172048:C:T	29597911	29597911	0	2.81e-06	5.46151	1.1493	-2223	Promoter eGene
ENSG00000189403	HMGB1	chr13	30456705	30617597	rs2388240:30285378:A:T	29711241	29711241	1	4.69e-05	-0.336463	0.0817495	-890893	Distal non-eGene
ENSG00000083642	PDS5B	chr13	32586428	32778019	rs4384488:34305630:G:A	33731493	33731493	0	4.56e-06	1.42682	0.306986	-380863	Distal non-eGene
ENSG00000180660	MAB21L1	chr13	35474183	35477209	rs1031776:36047374:G:A	35473237	35473237	0	2.15e-07	6.49131	1.23005	-530950	Distal non-eGene
ENSG00000172915	NBEA	chr13	34942288	35673022	rs9574068:36087418:C:T	35513281	35513281	0	2.11e-13	0.747692	0.0983778	-570994	Distal eGene
ENSG00000133103	COG6	chr13	39655628	39791665	rs5803002:40226103:ACTT:A	39651966	39651969	0	1.02e-21	-0.70406	0.0693227	-613660	Distal non-eGene
ENSG00000120690	ELF1	chr13	40931921	41061440	13:41362713:G:A	40788577	40788577	0	2.37e-05	1.61635	0.377868	272863	Distal eGene
ENSG00000151773	CCDC122	chr13	43823910	43879727	rs34391759:44466318:CA:C	43892182	43892183	0	3.8e-18	0.264488	0.0290152	684965	Distal non-eGene
ENSG00000179630	LACC1	chr13	43879285	43893932	rs9533691:44482208:A:G	43908072	43908072	1	1.45e-09	-0.419195	0.0676716	669075	Distal non-eGene
ENSG00000179630	LACC1	chr13	43879285	43893932	rs77332730:44494921:T:C	43920785	43920785	0	4.28e-11	2.05868	0.303582	656362	Distal non-eGene
ENSG00000136167	LCP1	chr13	46125921	46211871	rs1409429:46701371:T:A	46127236	46127236	1	1.4e-12	0.55672	0.0760922	-662338	Distal non-eGene
ENSG00000136141	LRCH1	chr13	46553169	46753040	rs118094856:47122780:C:T	46548645	46548645	0	1.05e-49	-1.41753	0.0828107	4523	Distal eGene
ENSG00000102547	CAB39L	chr13	49308651	49444126	rs9535244:50012407:C:T	49438271	49438271	0	8.19e-11	-0.464839	0.0696256	147312	Distal non-eGene
ENSG00000123179	EBPL	chr13	49660724	49691475	rs9568308:50265238:C:T	49691102	49691102	0	3.01e-20	-1.01356	0.104104	101819	Distal non-eGene
ENSG00000123179	EBPL	chr13	49660724	49691475	rs3809325:50266109:T:C	49691973	49691973	1	3.97e-09	-0.408117	0.0678083	100948	Distal non-eGene
ENSG00000204977	TRIM13	chr13	49995889	50020481	rs372935601:50604146:CAA:C	50030010	50030012	0	8.42e-18	2.15278	0.238905	880754	Distal non-eGene
ENSG00000236778	INTS6-AS1	chr13	51452368	51552364	13:52027532:C:T	51453396	51453396	1	3.17e-07	1.43145	0.275242	131059	Distal non-eGene
ENSG00000253710	ALG11	chr13	52012399	52029664	rs73184330:52571856:G:C	51997720	51997720	0	2.62e-13	1.01257	0.133795	131171	Distal non-eGene
ENSG00000281106	RP11-327P2.7	chr13	51813348	51845175	rs73500160:52693103:C:T	52118967	52118967	0	4.38e-06	-0.95241	0.204526	-106842	Distal non-eGene
ENSG00000253797	UTP14C	chr13	52024692	52033600	rs111611842:52697181:A:G	52123045	52123045	0	7.83e-06	1.40214	0.309593	-319207	Distal non-eGene
ENSG00000083520	DIS3	chr13	72752170	72782096	rs56270240:73409728:CT:C	72835590	72835591	0	5.88e-06	-1.6124	0.351128	1159466	Distal non-eGene
ENSG00000283208	RP11-226E21.4	chr13	76992079	77129589	exm1072875	77000471	77000471	0	3.13e-07	0.532013	0.102249	-8393	Distal eGene
ENSG00000227354	RBM26-AS1	chr13	79406310	79424328	rs314695:80006341:C:T	79432206	79432206	1	9.79e-17	-0.55767	0.0642201	48918	Distal non-eGene
ENSG00000183098	GPC6	chr13	93226843	94407401	rs4773723:93891725:T:C	93239472	93239472	0	4.36e-26	0.681894	0.0600687	-12630	Distal eGene
ENSG00000152749	GPR180	chr13	94601904	94634645	rs9561556:95064577:G:C	94412323	94412323	1	3.01e-05	0.317614	0.0752491	189580	Distal eGene
ENSG00000152749	GPR180	chr13	94601904	94634645	rs4238308:95275706:A:G	94623452	94623452	0	1.81e-13	0.507706	0.0666044	-143770	Distal non-eGene
ENSG00000134874	DZIP1	chr13	95578203	95644703	rs7324901:96273396:C:G	95621142	95621142	0	5.43e-12	1.84027	0.258904	432340	Distal non-eGene
ENSG00000102595	UGGT2	chr13	95801581	96053482	rs595696:96679916:G:A	96027662	96027662	0	9.72e-21	2.10638	0.213254	63177	Distal non-eGene
ENSG00000102466	FGF14	chr13	101710805	102402457	rs1927714:102427534:C:T	101775184	101775184	0	1.48e-08	1.04149	0.180098	3929096	Distal non-eGene
ENSG00000134897	BIVM	chr13	102799050	102841535	rs67351149:103452915:GTC:G	102800565	102800567	0	1.75e-06	0.982199	0.202421	9889250	Distal non-eGene
ENSG00000134884	ARGLU1	chr13	106541674	106568164	rs72658914:107227182:T:G	106574834	106574834	0	1.39e-05	5.81563	1.322	-5899741	Distal non-eGene
ENSG00000274718	RP11-346C4.3	chr13	107870384	107873372	rs9559179:108520925:C:G	107868577	107868577	0	2.2e-05	-0.12145	0.0282816	-1842	Promoter non-eGene
ENSG00000229152	ANKRD10-IT1	chr13	110894640	110899172	rs7332528:111538047:A:G	110885700	110885700	0	1.72e-15	-1.28992	0.155588	-8086651	Distal non-eGene
ENSG00000088448	ANKRD10	chr13	110878541	110915069	rs10664568:111545198:A:AGT	110892851	110892851	0	4.84e-22	-0.652131	0.0636403	-8490394	Distal non-eGene
ENSG00000088448	ANKRD10	chr13	110878541	110915069	rs2893380	110923079	110923079	1	1.02e-11	-0.613705	0.0875503	-8520622	Distal non-eGene
ENSG00000102606	ARHGEF7	chr13	111114560	111305737	rs9560002:111829012:C:T	111176665	111176665	1	1.39e-09	0.558941	0.0901168	-8417595	Distal non-eGene
ENSG00000260910	LINC00565	chr13	113926515	113928844	rs9604472:114622333:C:G	113919360	113919360	0	8.91e-11	0.22902	0.0343743	-3612211	Distal non-eGene
ENSG00000100814	CCNB1IP1	chr14	20311369	20333312	rs150957965:20806659:C:CAAAT	20338500	20338500	0	4.07e-08	-1.19277	0.213151	271295	Distal non-eGene
ENSG00000129562	DAD1	chr14	22564906	22589269	rs5742812	22572157	22572157	0	4.27e-27	4.0782	0.351004	264400	Distal non-eGene
ENSG00000259132	RP11-298I3.5	chr14	22946271	22982258	rs1923:23441179:G:A	22971970	22971970	0	1.83e-20	0.68881	0.0702963	85568	Distal non-eGene
ENSG00000100461	RBM23	chr14	22893207	22919184	exm1089307	22982136	22982136	0	3.7e-12	-1.58736	0.221472	75402	Distal non-eGene
ENSG00000100461	RBM23	chr14	22893207	22919184	rs1043675:23456315:T:C	22987106	22987106	1	6.11e-06	-0.313027	0.068291	70432	Distal non-eGene
ENSG00000259431	THTPA	chr14	23555989	23560271	rs59167088:24022923:A:G	23553714	23553714	0	1.59e-05	0.774471	0.177265	-84026	Distal non-eGene
ENSG00000157306	RP11-66N24.4	chr14	23511761	23560778	rs28403575:24025340:C:T	23556131	23556131	0	1.04e-12	1.38775	0.188519	-249296	Distal non-eGene
ENSG00000258727	RP11-66N24.3	chr14	23561098	23568073	rs2281679:24032091:G:C	23562882	23562882	0	9.39e-18	1.14333	0.127082	-256047	Distal non-eGene
ENSG00000186648	CARMIL3	chr14	24052001	24069728	rs35968612:24533862:C:CG	24064653	24064653	0	3.78e-06	0.754757	0.160974	50361	Distal non-eGene
ENSG00000157379	DHRS1	chr14	24290599	24299833	rs12586530:24766771:G:A	24297565	24297565	1	5.51e-11	0.69216	0.102688	-65143	Distal non-eGene
ENSG00000157379	DHRS1	chr14	24290599	24299833	rs2281472	24306640	24306640	0	8.1e-34	-0.945524	0.0709243	122646	Distal non-eGene
ENSG00000213906	LTB4R2	chr14	24305735	24312053	rs2281472	24306640	24306640	0	1.14e-10	0.956422	0.144429	122646	Distal non-eGene
ENSG00000213903	LTB4R	chr14	24311451	24318036	rs2281472	24306640	24306640	0	5.88e-16	3.13363	0.371314	122646	Distal non-eGene
ENSG00000157379	DHRS1	chr14	24290599	24299833	rs45442399:24791798:G:A	24322592	24322592	2	3.88e-07	0.663954	0.128655	108362	Distal non-eGene
ENSG00000129467	ADCY4	chr14	24318350	24335093	rs3181248:24808168:G:A	24338962	24338962	0	5.67e-08	-0.199749	0.0360973	90324	Distal non-eGene
ENSG00000100441	KHNYN	chr14	24429287	24441834	rs10140312:24897206:C:G	24428000	24428000	0	3.05e-12	0.887562	0.123324	-92907	Distal non-eGene
ENSG00000139899	CBLN3	chr14	24426533	24430954	rs10143703	24429149	24429149	0	3.12e-08	0.440422	0.0780146	-94056	Distal non-eGene
ENSG00000100441	KHNYN	chr14	24429287	24441834	rs3825588:24900231:G:C	24431025	24431025	1	1.17e-09	-0.646697	0.10377	-95932	Distal non-eGene
ENSG00000259522	RP11-468E2.2	chr14	24180396	24190416	rs7143804:24903245:C:T	24434039	24434039	0	1.68e-05	-0.273783	0.0628411	-98946	Distal non-eGene
ENSG00000100445	SDR39U1	chr14	24439767	24442905	rs79756911:24907580:G:A	24438374	24438374	0	3.43e-16	-7.96671	0.9358	-138512	Distal non-eGene
ENSG00000196792	STRN3	chr14	30893800	31026401	rs370758371:31378687:AAG:A	30909481	30909483	0	2.46e-10	-2.11581	0.325744	-287369	Distal non-eGene
ENSG00000151320	AKAP6	chr14	32329274	32837681	rs10141207:32691785:G:A	32222579	32222579	0	2.35e-08	-0.478449	0.0839649	-801997	Distal non-eGene
ENSG00000182400	TRAPPC6B	chr14	39147812	39170532	rs988420:39342307:C:A	38873103	38873103	1	6.35e-05	0.306056	0.0757124	-1277256	Distal non-eGene
ENSG00000165506	DNAAF2	chr14	49625175	49635230	exm1099738	49634964	49634964	0	6.73e-08	-0.570405	0.103685	132644	Distal non-eGene
ENSG00000125375	ATP5S	chr14	50312327	50335558	rs12892752:50779346:C:T	50312628	50312628	1	8.52e-07	-0.34503	0.0689827	248498	Distal non-eGene
ENSG00000012983	MAP4K5	chr14	50418502	50561126	rs17718908:51005213:A:G	50538495	50538495	0	4.17e-09	2.65833	0.4423	-226169	Distal non-eGene
ENSG00000100503	NIN	chr14	50719764	50831121	rs11157764:51250337:G:A	50783619	50783619	0	3.87e-06	7.2768	1.55369	-222493	Distal non-eGene
ENSG00000126777	KTN1	chr14	55559073	55701526	rs11851435:55921561:C:G	55454843	55454843	0	3.31e-10	-0.441714	0.068531	1033511	Distal non-eGene
ENSG00000139971	C14orf37	chr14	57999736	58298139	rs11158198:58576320:A:C	58109602	58109602	0	5.54e-11	0.686158	0.101811	188783	Distal non-eGene
ENSG00000131966	ACTR10	chr14	58200081	58235636	rs11158198:58576320:A:C	58109602	58109602	1	8.27e-10	0.416875	0.0662668	188783	Distal non-eGene
ENSG00000181619	GPR135	chr14	59429023	59465342	rs1272108:59904916:G:A	59438198	59438198	0	1.78e-15	0.392814	0.0474074	-301777	Distal non-eGene
ENSG00000126814	TRMT5	chr14	60971452	60981358	rs78220468:61091946:C:T	60625228	60625228	0	6.59e-05	-0.928722	0.230267	355886	Distal non-eGene
ENSG00000027075	PRKCH	chr14	61187560	61550976	14:61720695:TCCTC:T	61253977	61253981	0	3.51e-05	0.492298	0.117643	-614761	Distal non-eGene
ENSG00000081181	ARG2	chr14	67619799	67651720	rs147240406:68136268:GCCA:G	67669551	67669554	0	8.01e-19	4.82771	0.518106	-49753	Distal eGene
ENSG00000072110	ACTN1	chr14	68874144	68979440	rs7141817:69385225:A:C	68918508	68918508	0	7.41e-07	-0.347786	0.0691398	234642	Distal non-eGene
ENSG00000134007	ADAM20	chr14	70522359	70535015	rs77297399:71093182:T:C	70626465	70626465	0	2.33e-05	1.15256	0.269217	195539	Distal non-eGene
ENSG00000245466	CTD-2540L5.6	chr14	70608799	70641298	rs1572678:71107942:C:T	70641225	70641225	0	3.92e-21	0.819201	0.0820006	168980	Distal non-eGene
ENSG00000279026	RP3-414A15.12	chr14	73580695	73582918	rs8007853:73981569:G:A	73514865	73514865	2	3.22e-06	-0.587715	0.124446	119076	Distal non-eGene
ENSG00000184227	ACOT1	chr14	73537115	73543794	rs2336136:74030518:T:A	73563814	73563814	0	1.06e-26	0.792928	0.0688642	-4867	Distal non-eGene
ENSG00000205659	LIN52	chr14	74084797	74201235	rs4899482	73820516	73820516	0	2.68e-10	0.52319	0.0807298	-30231	Distal non-eGene
ENSG00000259065	RP5-1021I20.1	chr14	73787361	73803270	rs12887033:74292128:C:T	73825425	73825425	0	7.8e-58	1.31853	0.0694238	-35140	Distal non-eGene
ENSG00000187097	ENTPD5	chr14	73958011	74019399	14:74570130:ATTTTTTTTTTTTT:A	74103427	74103440	1	2.67e-11	-0.575008	0.0838585	136045	Distal non-eGene
ENSG00000119711	ALDH6A1	chr14	74056851	74084493	rs8013357:74574163:G:A	74107460	74107460	0	1.41e-17	-0.781168	0.0873552	132012	Distal non-eGene
ENSG00000119616	FCF1	chr14	74713145	74738620	rs11628616:74712623:G:A	74245920	74245920	0	2.4e-05	-1.43259	0.335209	-161124	Distal non-eGene
ENSG00000119725	ZNF410	chr14	73886618	73932511	rs78240185:74828636:T:G	74361933	74361933	0	1.44e-06	3.37488	0.689806	110427	Distal non-eGene
ENSG00000119673	ACOT2	chr14	73567621	73575658	rs8019152:74837096:T:A	74370393	74370393	2	4.32e-05	-0.417406	0.100933	123784	Distal non-eGene
ENSG00000119699	TGFB3	chr14	75958100	75982991	rs146047341:76448921:G:A	75982578	75982578	0	3.41e-10	-1.03783	0.161138	-348953	Distal non-eGene
ENSG00000100577	GSTZ1	chr14	77320885	77331597	rs8008449:77780784:G:A	77314441	77314441	0	6.49e-25	0.741748	0.0672016	-216130	Distal non-eGene
ENSG00000100629	CEP128	chr14	80476984	80959517	rs2215981:81444967:G:A	80978623	80978623	0	2.31e-10	0.456648	0.0701939	-2808250	Distal non-eGene
ENSG00000042088	TDP1	chr14	89954940	90044768	rs942190	89956320	89956320	0	3.63e-26	0.707022	0.0621671	-942934	Distal non-eGene
ENSG00000275198	RP11-471B22.3	chr14	90383366	90387973	rs7156456:90864608:T:G	90398264	90398264	0	5.39e-06	0.168948	0.0366396	418215	Distal non-eGene
ENSG00000140090	SLC24A4	chr14	92322582	92501483	rs61977292:92907480:G:A	92441136	92441136	1	4.67e-06	0.552482	0.119005	-319199	Distal non-eGene
ENSG00000176438	SYNE3	chr14	95407267	95475836	rs7156281:95973100:A:C	95506763	95506763	0	1.09e-05	-5.51505	1.23814	-30927	Distal eGene
ENSG00000140057	AK7	chr14	96392112	96489427	rs140430396:96765256:A:ATGTT	96298919	96298919	0	5.75e-28	1.36447	0.115177	93192	Distal eGene
ENSG00000247970	RP11-543C4.1	chr14	99604557	99625740	rs12891978:100076939:A:C	99610602	99610602	0	5.67e-08	0.144852	0.026176	-129433	Distal non-eGene
ENSG00000182218	HHIPL1	chr14	99645111	99680569	rs2144800	99619113	99619113	1	2.01e-05	0.304192	0.0704887	-137944	Distal non-eGene
ENSG00000066629	EML1	chr14	99737694	99942060	rs11625037:100221324:C:G	99754987	99754987	0	1.09e-11	9.88438	1.41232	-17294	Distal eGene
ENSG00000140105	WARS	chr14	100333789	100376805	rs12897688:100844420:G:A	100378083	100378083	0	1.38e-12	10.2707	1.40341	-139785	Distal non-eGene
ENSG00000078304	PPP2R5C	chr14	101761799	101927989	exm2272196	101717022	101717022	0	6.47e-08	-2.41262	0.437947	600355	Distal non-eGene
ENSG00000080823	MOK	chr14	102224501	102305200	rs7152627:102698399:A:G	102232062	102232062	0	1.15e-58	97.6763	5.09159	73138	Distal eGene
ENSG00000022976	ZNF839	chr14	102317378	102342702	rs11404221:102783599:T:TG	102317262	102317262	0	1.11e-11	1.34244	0.191902	-352734	Distal non-eGene
ENSG00000198752	CDC42BPB	chr14	102932380	103057462	rs10147340:103545173:C:T	103078836	103078836	0	1.32e-05	2.17877	0.493797	204097	Distal non-eGene
ENSG00000156411	C14orf2	chr14	103912289	103928269	rs28601645:104386172:C:T	103919835	103919835	0	1.53e-08	-5.26338	0.911194	-357939	Distal non-eGene
ENSG00000142208	AKT1	chr14	104769350	104795751	rs55839843:105238591:CCTGAG:C	104772254	104772259	0	1.37e-06	1.72883	0.352557	23497	Distal eGene
ENSG00000170113	NIPA1	chr15	22773064	22829791	rs72527190:23046770:T:TAA	22826298	22826298	0	1.39e-06	-1.63544	0.33373	-53235	Distal eGene
ENSG00000261069	RP11-701H24.4	chr15	25087662	25088896	rs77873907:25339076:A:G	25093929	25093929	0	5.86e-12	-0.76928	0.108408	-115346	Distal non-eGene
ENSG00000169857	AVEN	chr15	33866228	34039176	rs8040776:34335230:C:G	34043029	34043029	0	2.94e-13	-0.406862	0.0538796	331574	Distal non-eGene
ENSG00000182405	PGBD4	chr15	34102074	34108684	rs4780216:34401353:G:A	34109152	34109152	0	3.97e-20	-1.49247	0.153847	100944	Distal non-eGene
ENSG00000128463	EMC4	chr15	34225000	34230156	rs140494305:34519234:TAA:T	34227033	34227035	0	3.2e-46	-5.44215	0.333749	-258313	Distal non-eGene
ENSG00000182117	NOP10	chr15	34341714	34343177	rs56057955:34631927:T:C	34339726	34339726	0	1.61e-10	-0.991725	0.151062	-1666	Promoter non-eGene
ENSG00000250007	RP11-814P5.1	chr15	34755085	34812923	rs647621:35052371:C:T	34760170	34760170	1	3.29e-05	0.409024	0.0973875	-5086	Distal eGene
ENSG00000250007	RP11-814P5.1	chr15	34755085	34812923	rs1402857:35062779:A:C	34770578	34770578	0	5.56e-42	0.893228	0.058352	199261	Distal non-eGene
ENSG00000159251	ACTC1	chr15	34788097	34796139	rs640249	34799485	34799485	0	4.72e-10	-4.40087	0.689154	-44401	Distal non-eGene
ENSG00000171262	FAM98B	chr15	38454128	38487710	rs62002884:38735313:A:G	38443112	38443112	0	2.33e-05	-4.19594	0.980049	228735	Distal non-eGene
ENSG00000259330	INAFM2	chr15	40325217	40326715	rs2289333	40325008	40325008	0	4.85e-11	-0.778796	0.115186	80787	Distal non-eGene
ENSG00000188549	C15orf52	chr15	40331453	40340967	rs4923864:40634717:G:A	40342516	40342516	0	1.98e-15	2.35293	0.284475	63279	Distal non-eGene
ENSG00000128944	KNSTRN	chr15	40382722	40394246	rs146167647:40685021:AG:A	40392820	40392821	0	3.94e-87	4.1256	0.160026	12975	Distal non-eGene
ENSG00000247556	OIP5-AS1	chr15	41283991	41309737	rs368025013:40710761:AGCCCACCTCCCAGGGTAGGCACCTGGGGGCATGCAGGT:A	40418562	40418600	0	6.03e-05	-10.589	2.61144	-201134	Distal non-eGene
ENSG00000174171	RP11-23P13.6	chr15	41892794	41898575	rs1197705:42083843:G:A	41791645	41791645	0	1.61e-06	0.574982	0.118055	-17211	Distal non-eGene
ENSG00000243789	JMJD7	chr15	41828086	41837581	rs4923910:42086340:G:C	41794142	41794142	0	1.07e-08	0.338296	0.0579184	-19708	Distal non-eGene
ENSG00000137802	MAPKBP1	chr15	41774435	41827855	rs1197661:42144979:C:G	41852781	41852781	0	9.51e-08	0.401253	0.0738201	-24696	Distal non-eGene
ENSG00000137877	SPTBN5	chr15	41848145	41894077	rs1197691:42175104:G:C	41882906	41882906	0	3.46e-07	-15.8861	3.06485	11171	Distal eGene
ENSG00000188089	PLA2G4E	chr15	41981583	42051190	rs55905344:42340178:C:T	42047980	42047980	1	4.17e-11	0.5888	0.0867747	-75217	Distal non-eGene
ENSG00000188089	PLA2G4E	chr15	41981583	42051190	rs701408:42348948:T:C	42056750	42056750	0	2.02e-22	-0.853058	0.0823916	-5560	Distal eGene
ENSG00000103932	RPAP1	chr15	41517177	41544269	rs16972615:42364876:G:A	42072678	42072678	1	3.44e-05	0.503997	0.120289	83958	Distal non-eGene
ENSG00000159337	PLA2G4D	chr15	42067010	42094554	rs601823:42406430:C:T	42114232	42114232	0	6.3e-08	0.193367	0.0350686	-19678	Distal eGene
ENSG00000214013	GANC	chr15	42273234	42356935	rs600957:42406617:G:A	42114419	42114419	0	8.98e-05	0.563202	0.142339	-19865	Distal non-eGene
ENSG00000180979	LRRC57	chr15	42537821	42548802	rs58042601:42867649:C:A	42575451	42575451	0	1.48e-21	9.11183	0.901266	-84218	Distal non-eGene
ENSG00000278769	CTD-2036P10.5	chr15	42724103	42724922	rs58938096:43005804:G:T	42713606	42713606	0	7.71e-37	0.354345	0.025179	207203	Distal non-eGene
ENSG00000274403	CTD-2036P10.6	chr15	42726584	42727211	rs7174041:43022690:C:A	42730492	42730492	0	4.95e-05	0.0950164	0.023159	190317	Distal non-eGene
ENSG00000223572	CKMT1A	chr15	43692887	43699222	rs77502149:43091109:T:C	42798911	42798911	1	7.97e-05	-1.05647	0.265022	121898	Distal non-eGene
ENSG00000128881	TTBK2	chr15	42738735	42920809	rs71108191:43241643:T:TA	42949445	42949445	0	7.42e-06	3.28276	0.722936	-373786	Distal non-eGene
ENSG00000166946	CCNDBP1	chr15	43185119	43197176	rs9796684:43459683:G:A	43167485	43167485	1	9.82e-05	0.342132	0.0869568	-591826	Distal non-eGene
ENSG00000242866	STRC	chr15	43599399	43618800	rs117672353:43660384:G:A	43368186	43368186	1	7.59e-05	-1.10623	0.276675	142772	Distal non-eGene
ENSG00000223572	CKMT1A	chr15	43692887	43699222	rs7181665:43810916:G:C	43518718	43518718	0	3.78e-11	0.634807	0.0933372	-147693	Distal non-eGene
ENSG00000166763	STRCP1	chr15	43699489	43718184	rs7181665:43810916:G:C	43518718	43518718	0	2.61e-20	0.864394	0.0886199	-147693	Distal non-eGene
ENSG00000137770	CTDSPL2	chr15	44427235	44529038	rs34133842:44342726:CT:C	44050528	44050529	0	6.65e-05	1.53079	0.379757	144724	Distal non-eGene
ENSG00000138606	SHF	chr15	45167215	45201175	rs60001836:45454949:G:T	45162751	45162751	0	3.27e-07	0.380507	0.073246	239576	Distal non-eGene
ENSG00000259520	CTD-2651B20.3	chr15	45251581	45279251	rs8039153:45579813:T:C	45287615	45287615	0	1.27e-44	0.973021	0.0610746	-157682	Distal non-eGene
ENSG00000156958	GALK2	chr15	49155657	49367869	rs3098621:49518593:A:T	49226396	49226396	0	1.38e-10	0.85952	0.130402	-262952	Distal non-eGene
ENSG00000104064	GABPB1	chr15	50275393	50355408	rs11630045:50608279:G:C	50316082	50316082	0	7.7e-15	1.48798	0.184158	-133886	Distal non-eGene
ENSG00000104112	SCG3	chr15	51681354	51721031	rs2622770:51971322:A:G	51679125	51679125	0	1.16e-33	14.8646	1.11825	72436	Distal non-eGene
ENSG00000069966	GNB5	chr15	52115106	52191369	rs34439773:52450095:T:TA	52157898	52157898	0	2.53e-09	0.528491	0.0866656	-205792	Distal non-eGene
ENSG00000259577	RP11-430B1.2	chr15	52180094	52205874	rs12593939:52469192:A:G	52176995	52176995	0	5.2e-19	-0.451105	0.0481242	-224889	Distal non-eGene
ENSG00000069956	MAPK6	chr15	51952107	52067372	rs35277595:52504965:A:G	52212768	52212768	0	1.51e-05	-4.8595	1.10911	-260662	Distal eGene
ENSG00000137876	RSL24D1	chr15	55180807	55197067	rs28441971:55419312:G:A	55127114	55127114	0	3.8e-10	0.624342	0.0972095	-1150206	Distal non-eGene
ENSG00000279145	RP11-547D13.1	chr15	55171973	55178175	rs72011259:55471029:TGATTAA:T	55178831	55178837	0	1.64e-20	0.783922	0.0798932	-1201923	Distal non-eGene
ENSG00000256061	DYX1C1	chr15	55410526	55508234	rs113322388:55767132:G:A	55474934	55474934	1	1.67e-12	-0.885515	0.121482	23426	Distal non-eGene
ENSG00000138587	MNS1	chr15	56421545	56465137	rs795781:56714909:G:C	56422711	56422711	0	1.41e-07	0.64503	0.120356	-178702	Distal non-eGene
ENSG00000128918	ALDH1A2	chr15	57953425	58497866	rs11375411:58509967:C:CT	58217768	58217768	2	4.82e-06	-0.418673	0.0903144	1154925	Distal non-eGene
ENSG00000157470	FAM81A	chr15	59372694	59523549	rs4238339:59785459:G:A	59493260	59493260	0	2.76e-05	-0.195052	0.0459845	-995394	Distal non-eGene
ENSG00000171914	TLN2	chr15	62390527	62844631	rs2459898:62701834:T:A	62409635	62409635	0	4.4e-32	0.919805	0.0713098	-19109	Distal eGene
ENSG00000140416	TPM1	chr15	63042633	63071915	rs16946330:63324501:C:G	63032302	63032302	0	4.04e-08	5.58873	0.998434	-148268	Distal non-eGene
ENSG00000259370	RP11-1069G10.1	chr15	62827676	62884034	rs2652842:63391939:C:A	63099740	63099740	0	1.79e-05	-1.83763	0.423248	-215706	Distal eGene
ENSG00000166128	RAB8B	chr15	63189470	63267782	rs8041454:63485976:T:C	63193777	63193777	0	1.28e-13	-2.10052	0.273722	-4308	Distal eGene
ENSG00000278737	RP11-325L12.7	chr15	65083043	65083663	15:64816762:CA:C	64524563	64524564	0	2.01e-05	3.19095	0.739393	-63821	Distal non-eGene
ENSG00000246922	UBAP1L	chr15	65092771	65115197	15:64816762:CA:C	64524563	64524564	0	1.4e-05	72.858	16.5653	-63821	Distal non-eGene
ENSG00000103671	TRIP4	chr15	64387749	64455303	rs10635518:64930193:T:TTA	64637994	64637994	0	8.84e-08	-1.61017	0.295473	-177252	Distal non-eGene
ENSG00000180357	ZNF609	chr15	64460743	64686068	rs11631564:64973611:G:A	64681412	64681412	0	1.4e-06	4.7258	0.964783	-220670	Distal eGene
ENSG00000265967	AC100830.4	chr15	64695042	64695594	rs11631564:64973611:G:A	64681412	64681412	0	1.18e-07	0.19949	0.0369803	-299972	Distal non-eGene
ENSG00000090487	SPG21	chr15	64963022	64990310	rs67054282:65247614:A:G	64955267	64955267	0	4.26e-10	-1.47111	0.229744	-179680	Distal non-eGene
ENSG00000103710	RASL12	chr15	65053338	65076690	rs7170256:65375072:C:T	65082734	65082734	0	1.12e-13	0.543515	0.070638	-6044	Distal eGene
ENSG00000103710	RASL12	chr15	65053338	65076690	15:65684422:T:TCCCCC	65392084	65392084	1	6.17e-05	-0.35847	0.0885287	-14044	Distal non-eGene
ENSG00000103742	IGDCC4	chr15	65381465	65423072	rs12437686:65686908:A:G	65394570	65394570	1	2.53e-09	0.545697	0.0894917	-16530	Distal non-eGene
ENSG00000169032	MAP2K1	chr15	66386818	66492312	rs12915164:66591223:A:G	66298885	66298885	0	2.46e-20	1.22489	0.125488	-506592	Distal non-eGene
ENSG00000174446	SNAPC5	chr15	66490136	66497813	rs79227224:66786706:TGAG:T	66494368	66494371	0	7.79e-27	-2.45415	0.212484	-107551	Distal non-eGene
ENSG00000128973	CLN6	chr15	68206993	68257211	rs185136670:67812346:C:T	67520008	67520008	2	2.63e-05	1.17362	0.275955	22596	Distal non-eGene
ENSG00000033800	PIAS1	chr15	68054180	68198603	rs58437813:68194099:A:G	67901761	67901761	2	1.69e-05	0.490017	0.112525	152418	Distal eGene
ENSG00000260007	RP11-315D16.2	chr15	68184033	68229718	rs143844142:68478310:A:AAAAC	68185972	68185972	0	5.81e-11	-1.55722	0.23132	-353247	Distal non-eGene
ENSG00000033800	PIAS1	chr15	68054180	68198603	rs148538492:68818198:C:T	68525859	68525859	1	2.57e-06	1.22401	0.256557	292362	Distal non-eGene
ENSG00000128973	CLN6	chr15	68206993	68257211	rs79343259:69020215:G:A	68727876	68727876	1	2e-05	-0.822676	0.190598	90345	Distal non-eGene
ENSG00000166173	LARP6	chr15	70829131	70854159	exm-rs1549318	70816808	70816808	0	8.28e-09	0.66569	0.113061	280144	Distal non-eGene
ENSG00000140488	CELF6	chr15	72284728	72320129	rs12148063:72046672:A:G	71754333	71754333	0	1.59e-05	2.43355	0.557013	401126	Distal non-eGene
ENSG00000166233	ARIH1	chr15	72474327	72602985	rs72744702:72121018:C:A	71828677	71828677	0	8.94e-05	8.6203	2.17798	289900	Distal non-eGene
ENSG00000178802	MPI	chr15	74890006	74902219	rs2960192:75049943:G:A	74757602	74757602	0	3.07e-10	1.80728	0.279835	-159102	Distal non-eGene
ENSG00000140474	ULK3	chr15	74836117	74843346	rs1867152:75239204:C:T	74946863	74946863	0	4.51e-05	-3.78507	0.917643	-348363	Distal non-eGene
ENSG00000138621	PPCDC	chr15	75023556	75117462	rs34492112:75294917:G:A	75002576	75002576	0	4.8e-06	-0.447667	0.0965512	193067	Distal non-eGene
ENSG00000198794	SCAMP5	chr15	74957220	75021496	rs7342591:75306863:A:G	75014522	75014522	0	7.56e-16	-1.09864	0.130719	-57303	Distal eGene
ENSG00000198794	SCAMP5	chr15	74957220	75021496	rs117421449:75458875:T:A	75166534	75166534	1	5.39e-05	-0.598076	0.146518	-142979	Distal non-eGene
ENSG00000140398	NEIL1	chr15	75346956	75357114	rs11300642:75681644:GA:G	75389303	75389304	1	3.24e-07	0.372983	0.0717771	66539	Distal non-eGene
ENSG00000169375	SIN3A	chr15	75369380	75455842	rs4886453:75937273:C:A	75644932	75644932	0	1.69e-06	2.51216	0.51699	-276302	Distal non-eGene
ENSG00000159556	ISL2	chr15	76336725	76342476	rs12595717:76477038:G:A	76184697	76184697	0	5.48e-07	0.297104	0.0583543	720747	Distal non-eGene
ENSG00000140374	ETFA	chr15	76215356	76311472	rs2456047:76484830:A:T	76192489	76192489	0	1.05e-09	-2.90877	0.465373	712955	Distal non-eGene
ENSG00000173517	PEAK1	chr15	77100657	77420144	rs113274654:77390571:T:C	77098229	77098229	1	8.17e-11	0.497349	0.0744916	470741	Distal non-eGene
ENSG00000140382	HMG20A	chr15	77420413	77485607	15:77411350:C:CATTTACTTATAAACTGTGCAGCAGGAGAACAAAACCAGAAGGTTGA	77119008	77119008	0	9.89e-14	0.522688	0.0677754	301404	Distal eGene
ENSG00000173517	PEAK1	chr15	77100657	77420144	rs34117093:77497587:A:AT	77205245	77205245	0	8.34e-19	0.684123	0.0734611	320295	Distal non-eGene
ENSG00000136425	CIB2	chr15	78104607	78131544	rs143479003:78114380:G:A	77822038	77822038	1	3.72e-05	-1.00662	0.241343	-1138	Promoter non-eGene
ENSG00000136425	CIB2	chr15	78104607	78131544	rs11547207:78423596:A:C	78131254	78131254	0	1.88e-27	0.791755	0.0676022	244	Promoter non-eGene
ENSG00000080644	CHRNA3	chr15	78593053	78621295	rs8040868:78911181:T:C	78618839	78618839	0	4.56e-26	-0.729402	0.0642837	108915	Distal non-eGene
ENSG00000261762	RP11-650L12.2	chr15	78589124	78591276	rs34573245:78915370:CT:C	78623028	78623029	0	5.18e-07	-0.37239	0.0729817	104726	Distal non-eGene
ENSG00000259555	RP11-335K5.2	chr15	78625896	78628193	rs111664537:78919550:G:C	78627208	78627208	0	1.26e-10	1.0149	0.153626	100546	Distal non-eGene
ENSG00000041357	PSMA4	chr15	78540406	78552419	rs35177398:78983221:TA:T	78690879	78690880	0	4.95e-07	1.10256	0.215696	36875	Distal non-eGene
ENSG00000169330	KIAA1024	chr15	79432517	79472290	rs28662322:79646718:C:T	79354376	79354376	0	3.87e-06	-3.50132	0.747592	543003	Distal non-eGene
ENSG00000136371	MTHFS	chr15	79833586	79897379	rs622506:80139195:A:C	79846853	79846853	0	1.68e-07	0.602968	0.113216	-535791	Distal non-eGene
ENSG00000103876	FAH	chr15	80152491	80186946	rs7179137:80462711:G:A	80170369	80170369	0	8.03e-06	-0.21562	0.0476675	-859307	Distal non-eGene
ENSG00000136379	ABHD17C	chr15	80679685	80755621	rs35505201:81032198:G:GCTGT	80739857	80739857	0	1.22e-10	1.46541	0.221671	-60173	Distal eGene
ENSG00000259462	CPEB1-AS1	chr15	82647771	82692820	rs58477222:82399410:C:T	82107069	82107069	0	1.63e-05	0.139658	0.0320024	-679621	Distal non-eGene
ENSG00000278662	GOLGA6L10	chr15	82339999	82349475	rs62011974:82432623:C:T	82140282	82140282	2	1.74e-07	0.865492	0.162721	-737256	Distal non-eGene
ENSG00000278202	RP11-152F13.8	chr15	82418652	82434235	rs4778665:82436504:G:A	82144163	82144163	0	1.79e-08	0.330781	0.0575492	-741137	Distal non-eGene
ENSG00000278662	GOLGA6L10	chr15	82339999	82349475	rs72749536:82448358:G:A	82156017	82156017	1	3.2e-12	1.27951	0.177961	-728569	Distal non-eGene
ENSG00000259429	UBE2Q2P2	chr15	82355143	82420075	rs8030250:82519539:C:T	82227198	82227198	0	1.41e-13	-0.625588	0.0816751	-1067623	Distal non-eGene
ENSG00000230373	GOLGA6L5P	chr15	84507886	84516814	rs8023310:85129486:G:T	84586255	84586255	0	1.99e-33	-0.895539	0.067666	298399	Distal non-eGene
ENSG00000176700	SCAND2P	chr15	84631452	84647478	rs3748374:85184243:A:G	84641012	84641012	0	3.72e-27	7.84685	0.67445	107623	Distal non-eGene
ENSG00000276278	RP11-182J1.3	chr15	84622016	84623237	rs201991585:85185576:CAAAAAAA:C	84642345	84642352	0	3.93e-07	0.314684	0.0610103	106290	Distal non-eGene
ENSG00000275120	RP11-182J1.18	chr15	84597810	84633987	rs66810580:85198350:G:C	84655119	84655119	1	2.44e-06	-0.718629	0.150259	93516	Distal non-eGene
ENSG00000177082	WDR73	chr15	84639282	84654343	rs2292462	84657523	84657523	0	1.65e-19	-0.60374	0.063412	91112	Distal non-eGene
ENSG00000259295	CSPG4P12	chr15	85191439	85213905	rs78648941:85517022:G:A	84973791	84973791	2	4.99e-05	-0.587584	0.143285	6649	Distal non-eGene
ENSG00000140538	NTRK3	chr15	87859752	88256768	rs59628990:88798812:A:T	88255581	88255581	0	5.68e-07	0.531555	0.104549	-2175608	Distal non-eGene
ENSG00000140526	ABHD2	chr15	89087460	89202360	rs11073770:88820515:A:C	88277284	88277284	1	6e-06	-0.37524	0.0817939	-2197311	Distal non-eGene
ENSG00000140511	HAPLN3	chr15	88877289	88895626	rs16942443:89439824:T:C	88896593	88896593	0	1.02e-23	-1.072	0.100068	93652	Distal non-eGene
ENSG00000166823	MESP1	chr15	89748662	89751310	rs150457886:89520430:A:G	88977199	88977199	0	9.44e-06	0.458521	0.102186	-63788	Distal non-eGene
ENSG00000166819	PLIN1	chr15	89664366	89679427	rs7163469:89971873:A:G	89428642	89428642	1	8.29e-06	0.409644	0.0907061	-69801	Distal non-eGene
ENSG00000166819	PLIN1	chr15	89664366	89679427	rs76741626:90294675:G:C	89751444	89751444	0	1.44e-09	0.517187	0.0834795	143194	Distal non-eGene
ENSG00000188095	MESP2	chr15	89760592	89778754	rs34448659:90310885:GA:G	89767654	89767655	0	4.3e-32	0.532865	0.0413036	126984	Distal non-eGene
ENSG00000250021	C15orf38-AP3S2	chr15	89834309	89912882	rs8026131:90417999:C:G	89874767	89874767	0	3.64e-10	-1.62128	0.252156	-183970	Distal non-eGene
ENSG00000185033	SEMA4B	chr15	90160605	90229679	rs72449355:90724732:CA:C	90181500	90181501	0	1.5e-09	12.9364	2.0903	-20896	Distal eGene
ENSG00000261147	RP11-697E2.6	chr15	90249557	90272208	rs1040083:90768156:A:G	90224924	90224924	0	2.64e-06	-0.420203	0.0881847	-64320	Distal non-eGene
ENSG00000185043	CIB1	chr15	90229976	90234047	rs2073704:90774987:G:A	90231755	90231755	0	5.14e-27	0.720476	0.062124	-71151	Distal non-eGene
ENSG00000196391	ZNF774	chr15	90352246	90369146	rs2601190:90932966:A:C	90389734	90389734	0	4.05e-08	-0.570093	0.101861	-37489	Distal eGene
ENSG00000182511	FES	chr15	90883696	90895776	rs2521501	90894158	90894158	1	1.18e-09	-0.471655	0.0756999	-364233	Distal non-eGene
ENSG00000196547	MAN2A2	chr15	90902219	90922584	rs2677749:91452865:A:G	90909635	90909635	0	2.09e-14	-0.540852	0.06814	-7417	Distal eGene
ENSG00000140553	UNC45A	chr15	90930181	90954093	rs35389361:91493589:T:C	90950359	90950359	0	3.08e-06	1.67253	0.353437	72260	Distal non-eGene
ENSG00000166965	RCCD1	chr15	90954871	90963125	exm1190854	90956756	90956756	1	1.04e-17	-0.987275	0.109904	143194	Distal non-eGene
ENSG00000258725	PRC1-AS1	chr15	90966346	90988624	rs77554484:91509215:C:A	90965985	90965985	0	2.14e-09	-0.242812	0.0396293	29644	Distal non-eGene
ENSG00000213471	TTLL13P	chr15	90249531	90265482	rs8026662:91783807:C:T	91240577	91240577	1	2.57e-05	0.343653	0.0807073	-217974	Distal non-eGene
ENSG00000260337	RP11-386M24.6	chr15	92592575	92596462	rs34327113:93247413:C:T	92704183	92704183	1	3.86e-07	-0.565482	0.109549	-850488	Distal non-eGene
ENSG00000173575	CHD2	chr15	92900190	93028005	rs12438062:93433522:C:T	92890292	92890292	0	8.72e-06	-4.6288	1.02751	-80408	Distal non-eGene
ENSG00000140443	IGF1R	chr15	98648972	98964530	rs10679407:99191743:G:GGC	98648514	98648514	1	3.79e-07	0.393147	0.0761102	457	Promoter eGene
ENSG00000261616	RP11-6O2.3	chr15	99139318	99145370	rs112065296:99646218:C:A	99106013	99106013	0	1.16e-15	0.977427	0.117121	145210	Distal non-eGene
ENSG00000068305	MEF2A	chr15	99565418	99716466	rs3216755:100243859:AT:A	99703654	99703655	0	5.3e-08	2.06082	0.371551	-597830	Distal non-eGene
ENSG00000183060	LYSMD4	chr15	99715698	99733561	rs36078095:100273207:C:CG	99733002	99733002	0	7.34e-41	-0.994987	0.0661518	-481779	Distal non-eGene
ENSG00000254744	CTD-3076O17.1	chr15	99970216	99974010	rs2727189:100500445:T:C	99960240	99960240	0	2.72e-31	-0.338527	0.0266572	958975	Distal non-eGene
ENSG00000189419	SPATA41	chr15	100344458	100349655	rs55785541:100890478:G:A	100350273	100350273	0	1.03e-05	0.278965	0.06243	252261	Distal non-eGene
ENSG00000270127	RP11-526I2.5	chr15	100547766	100550153	rs3764198	100570360	100570360	1	4.82e-06	-0.502902	0.108489	-1318998	Distal non-eGene
ENSG00000259205	PRKXP1	chr15	100553530	100558954	rs36053285:101114640:T:C	100574435	100574435	0	2.46e-44	-0.352065	0.0221929	-1323073	Distal non-eGene
ENSG00000140471	LINS1	chr15	100559370	100603230	rs57403659:101131566:C:G	100591361	100591361	0	2.9e-08	1.05374	0.18619	-249356	Distal non-eGene
ENSG00000272808	RP11-66B24.7	chr15	100849832	100865457	rs7178773:101390674:G:A	100850469	100850469	0	1.64e-08	-0.179265	0.0310986	-477530	Distal non-eGene
ENSG00000184254	ALDH1A3	chr15	100877715	100916626	rs4646671	100899148	100899148	0	9.23e-07	0.280222	0.0562104	-557143	Distal non-eGene
ENSG00000154237	LRRK1	chr15	100919216	101078254	rs74406250:101556026:C:G	101015821	101015821	0	2.72e-11	0.501179	0.0731201	-413287	Distal non-eGene
ENSG00000131876	SNRPA1	chr15	101281511	101295282	rs28698071:101826919:G:A	101286714	101286714	0	1.19e-06	-1.37214	0.278205	-684180	Distal non-eGene
ENSG00000259172	RP11-299G20.2	chr15	101295420	101305737	rs35874148:101855069:T:G	101314864	101314864	0	1.57e-05	-0.181799	0.0415844	266692	Distal non-eGene
ENSG00000184277	TM2D3	chr15	101621445	101652391	rs675436:102192540:T:G	101652337	101652337	0	1.03e-24	0.666155	0.0606479	-1310332	Distal non-eGene
ENSG00000184277	TM2D3	chr15	101621445	101652391	rs62027589:102201203:T:C	101661000	101661000	1	4.81e-09	0.554799	0.0927012	-1058466	Distal non-eGene
ENSG00000103202	NME4	chr16	396726	410367	rs6600215:445021:C:T	395021	395021	0	8.23e-18	-1.07473	0.119227	194336	Distal non-eGene
ENSG00000168101	NUDT16L1	chr16	4693695	4695859	rs72762719:4030322:C:G	3980321	3980321	0	8.59e-06	1.1359	0.25195	273468	Distal non-eGene
ENSG00000183454	GRIN2A	chr16	9753405	10182754	rs2955395:9246177:C:G	9152320	9152320	1	2.49e-05	0.402132	0.0942733	1030434	Distal eGene
ENSG00000213853	EMP2	chr16	10528423	10580698	rs4486889:10608402:C:G	10514545	10514545	0	1.45e-06	0.575785	0.11772	-1357664	Distal non-eGene
ENSG00000234719	RP11-166B2.1	chr16	11927374	11976643	rs393329:12070422:T:C	11976565	11976565	0	5.38e-103	-1.19332	0.0402882	172	Promoter non-eGene
ENSG00000103381	CPPED1	chr16	12659800	12804017	rs145573402:12912284:A:AAAAACAAAAC	12818427	12818427	0	1.79e-07	1.21614	0.2289	-841690	Distal non-eGene
ENSG00000234719	RP11-166B2.1	chr16	11927374	11976643	rs892374:12917988:A:G	12824131	12824131	1	3.04e-05	-0.38591	0.0914761	-847394	Distal non-eGene
ENSG00000170537	TMC7	chr16	18983935	19063942	rs56743170:19085873:A:G	19074551	19074551	0	2.79e-14	1.16307	0.1473	449260	Distal non-eGene
ENSG00000103540	CCP110	chr16	19523812	19553408	rs226860:19608404:T:C	19597082	19597082	0	1.84e-06	-2.11948	0.437709	289085	Distal non-eGene
ENSG00000260790	RP11-21M24.2	chr16	22374860	22378180	rs5816174:22301431:GT:G	22290110	22290111	0	3.15e-08	0.221676	0.0392788	-83828	Distal non-eGene
ENSG00000166851	PLK1	chr16	23677657	23690367	rs34667957:23449404:CA:C	23438083	23438084	0	1.33e-05	-0.267702	0.0606979	-255368	Distal non-eGene
ENSG00000169189	NSMCE1	chr16	27224992	27268794	rs10852315:27235792:A:C	27224471	27224471	0	2.71e-10	0.792387	0.122298	-1966519	Distal non-eGene
ENSG00000259940	CTD-3203P2.1	chr16	27213309	27214993	rs34939984:27245712:C:T	27234391	27234391	0	6.72e-09	-0.431424	0.0728109	315522	Distal non-eGene
ENSG00000214725	CDIPT-AS1	chr16	29863594	29868053	rs747973	29863920	29863920	0	9.27e-48	-0.914487	0.0548734	159350	Distal non-eGene
ENSG00000149922	TBX6	chr16	30085794	30091887	rs3809627:30103160:C:A	30091839	30091839	0	7.27e-10	-0.213076	0.0337527	286267	Distal non-eGene
ENSG00000103549	RNF40	chr16	30761746	30776307	rs72785547:31119554:G:A	31108233	31108233	0	3.13e-10	-0.46363	0.0718281	334927	Distal non-eGene
ENSG00000087245	MMP2	chr16	55389701	55506691	rs1005912:55504827:A:T	55470915	55470915	0	3.02e-29	-0.747669	0.0613962	184689	Distal non-eGene
ENSG00000087253	LPCAT2	chr16	55508999	55586670	rs1005912:55504827:A:T	55470915	55470915	0	1.91e-60	-7.05494	0.360096	184689	Distal non-eGene
ENSG00000261997	RP11-212I21.4	chr16	55538201	55542027	rs1005912:55504827:A:T	55470915	55470915	0	3.23e-39	-0.633488	0.0432484	184689	Distal non-eGene
ENSG00000140854	KATNB1	chr16	57735731	57757250	rs35820612:57831336:C:G	57797424	57797424	0	1.56e-14	1.79471	0.224919	65629	Distal non-eGene
ENSG00000159648	TEPP	chr16	57976436	57988116	rs4583232	57977546	57977546	0	8.62e-34	0.652084	0.0489379	-114493	Distal non-eGene
ENSG00000103047	TANGO6	chr16	68843605	69085180	rs58592397:67967290:CA:C	67933387	67933388	0	5.68e-05	-1.08974	0.267795	-126622	Distal non-eGene
ENSG00000132600	PRMT7	chr16	68310975	68358563	rs9933029:68303410:A:G	68269507	68269507	1	5.46e-06	0.335328	0.0727664	41467	Distal eGene
ENSG00000226232	RP11-419C5.2	chr16	69976389	69996188	rs62050972:70175313:A:G	70141410	70141410	1	5.98e-08	-0.451804	0.0817943	4226830	Distal non-eGene
ENSG00000259972	AC009120.6	chr16	74305128	74335346	rs62055171:74394671:T:C	74360773	74360773	0	3.25e-05	0.607304	0.144497	-4247147	Distal non-eGene
ENSG00000140839	CLEC18B	chr16	74408271	74421953	rs2549282:74395902:G:C	74362004	74362004	3	3.75e-05	0.337446	0.0809376	-4248378	Distal non-eGene
ENSG00000186187	ZNRF1	chr16	74999031	75110994	rs13337167:75029495:C:T	74995597	74995597	0	4.44e-12	2.57044	0.360055	3433	Distal eGene
ENSG00000280152	RP11-331F4.5	chr16	75245995	75250077	rs11649684:75302979:G:A	75269081	75269081	1	4.34e-05	0.383149	0.0926773	164404	Distal non-eGene
ENSG00000260922	RP11-538I12.3	chr16	77234878	77290934	rs4888612:77272064:T:C	77238167	77238167	0	9.22e-19	0.805232	0.0865863	352639	Distal non-eGene
ENSG00000140873	ADAMTS18	chr16	77247814	77435114	rs147961520:77610478:T:C	77576581	77576581	1	1.67e-05	0.69153	0.158681	-326624	Distal non-eGene
ENSG00000276007	RP11-358L22.3	chr16	78123244	78124332	rs16947125:78151337:A:C	78117440	78117440	0	1.86e-10	0.267103	0.040832	2445695	Distal non-eGene
ENSG00000186153	WWOX	chr16	78099414	79212667	rs11649531:78152767:G:C	78118870	78118870	2	2.61e-06	-0.346455	0.07267	2444265	Distal non-eGene
ENSG00000103154	NECAB2	chr16	83968633	84002776	rs113294289:84008516:C:T	83974911	83974911	1	8.81e-06	1.02334	0.227279	579122	Distal non-eGene
ENSG00000103248	MTHFSD	chr16	86530177	86555235	rs140738600:86593491:T:TG	86559885	86559885	0	1.19e-06	0.692767	0.140443	506820	Distal non-eGene
ENSG00000141252	VPS53	chr17	508669	721717	rs77612020:400799:G:A	497559	497559	2	1.66e-05	-0.492976	0.113091	-51620	Distal non-eGene
ENSG00000183688	FAM101B	chr17	439979	445939	rs60319119:406402:A:G	503162	503162	0	7.81e-26	-0.717909	0.0636202	-57223	Distal eGene
ENSG00000183688	FAM101B	chr17	439979	445939	rs385894:591078:G:A	687838	687838	1	7.88e-09	0.44144	0.0748615	-273815	Distal non-eGene
ENSG00000141252	VPS53	chr17	508669	721717	rs838371:609275:T:C	706035	706035	1	5.25e-09	0.404397	0.0677452	-292012	Distal non-eGene
ENSG00000108963	DPH1	chr17	2030111	2043430	rs11078793:1951364:T:A	2048070	2048070	0	1.4e-19	-2.90092	0.304026	-218368	Distal non-eGene
ENSG00000262333	HNRNPA1P16	chr17	2306762	2307715	rs12949014:1974384:G:A	2071090	2071090	0	3.26e-05	0.365189	0.0869095	232681	Distal non-eGene
ENSG00000262089	RP11-589P10.5	chr17	6994643	6995189	rs35151234:6896349:C:G	6993030	6993030	0	2.76e-07	0.100428	0.0192085	-139169	Distal non-eGene
ENSG00000219200	RNASEK	chr17	7012418	7014532	rs3180517:6917850:C:A	7014531	7014531	0	7.29e-09	-0.622848	0.105377	-362813	Distal non-eGene
ENSG00000072818	ACAP1	chr17	7336530	7351478	exm1286923	7350996	7350996	0	5.18e-06	0.199313	0.0431434	197895	Distal non-eGene
ENSG00000170175	CHRNB1	chr17	7445062	7457707	exm-rs9217	7459769	7459769	0	5.44e-25	1.06952	0.0967169	24494	Distal non-eGene
ENSG00000161955	TNFSF13	chr17	7558293	7561608	exm1288075	7559652	7559652	0	1.82e-10	-1.3455	0.20556	-223123	Distal non-eGene
ENSG00000129194	SOX15	chr17	7588179	7590170	rs57676268:7513273:C:CAT	7609955	7609955	0	6.7e-08	-0.515199	0.0936347	-26426	Distal non-eGene
ENSG00000133026	MYH10	chr17	8474206	8630761	17:7523029:CA:C	7619711	7619712	1	3.09e-05	-1.01673	0.241236	67839	Distal non-eGene
ENSG00000280046	RP11-1099M24.6	chr17	7858944	7866083	rs4290529:7767731:C:T	7864413	7864413	0	2.84e-08	-1.7626	0.311248	174604	Distal non-eGene
ENSG00000109047	RCVRN	chr17	9896321	9905621	rs75438860:9801828:T:C	9898511	9898511	0	6.46e-41	-0.975941	0.0648284	300040	Distal non-eGene
ENSG00000266709	RP11-214O1.2	chr17	14303855	14305505	rs7223809:14200898:G:A	14297581	14297581	0	5.8e-12	0.737284	0.103878	-695654	Distal non-eGene
ENSG00000007171	NOS2	chr17	27756767	27800499	rs3751972:26206414:C:A	27879388	27879388	0	1.19e-41	-0.42597	0.0279711	-78889	Distal eGene
ENSG00000227543	SPAG5-AS1	chr17	28598791	28617377	rs2286519:26881730:G:A	28554712	28554712	0	6.19e-07	-1.12923	0.222875	59485	Distal non-eGene
ENSG00000167525	PROCA1	chr17	28703198	28711854	rs149264208:27047243:T:TG	28720225	28720225	0	1.15e-34	-1.6613	0.122685	177454	Distal non-eGene
ENSG00000004139	SARM1	chr17	28364357	28404049	rs56365334:27433403:G:A	29106385	29106385	1	4.04e-05	0.299308	0.0721042	-155872	Distal non-eGene
ENSG00000196712	NF1	chr17	31094928	31382116	rs25533:28562892:A:G	30235874	30235874	1	1.65e-05	0.6601	0.151392	-120353	Distal non-eGene
ENSG00000108671	PSMD11	chr17	32444262	32483318	rs11651449:30640807:A:G	32313788	32313788	0	1.17e-05	1.18268	0.266463	-171334	Distal non-eGene
ENSG00000141314	RHBDL3	chr17	32266177	32324661	rs72811096:30647302:A:T	32320283	32320283	0	3.61e-11	3.59878	0.528564	-177829	Distal non-eGene
ENSG00000010244	ZNF207	chr17	32350110	32381886	rs138793371:30790545:TA:T	32463527	32463528	0	2.08e-06	-6.81837	1.41574	413650	Distal non-eGene
ENSG00000263571	CTC-304I17.5	chr17	34155567	34165679	rs35762037:32486415:T:TC	34159396	34159396	1	1.32e-07	-0.435365	0.081027	15568	Distal non-eGene
ENSG00000005156	LIG3	chr17	34980495	35009743	rs3135983:33318312:T:G	34991293	34991293	1	9.18e-16	-0.938909	0.112072	130200	Distal non-eGene
ENSG00000263874	LINC00672	chr17	38925169	38929384	rs61592517:37139138:CAAAAAAAAAA:C	38982885	38982895	0	1.88e-09	-0.458356	0.0745327	171509	Distal non-eGene
ENSG00000263874	LINC00672	chr17	38925169	38929384	exm2252970	39066873	39066873	1	5.75e-06	0.318047	0.0691816	106417	Distal non-eGene
ENSG00000188895	MSL1	chr17	40122299	40136916	rs56304903:38346802:C:G	40190550	40190550	0	8.85e-15	-7.53282	0.934567	-175189	Distal non-eGene
ENSG00000108349	CASC3	chr17	40140319	40172183	rs9894845:38506457:T:C	40350205	40350205	1	3.01e-06	-0.736166	0.155404	-62572	Distal non-eGene
ENSG00000108352	RAPGEFL1	chr17	40177011	40195656	rs200353854:38507378:ACTCTCC:A	40351126	40351132	0	7.36e-29	7.34511	0.608129	-63493	Distal non-eGene
ENSG00000073584	SMARCE1	chr17	40624963	40648508	rs8074179:38770965:C:G	40614713	40614713	0	1.3e-26	-4.8778	0.424485	1050853	Distal non-eGene
ENSG00000008838	MED24	chr17	40019098	40061215	rs72824013:38959623:C:T	40803371	40803371	0	4.65e-05	3.42391	0.83148	862195	Distal non-eGene
ENSG00000167920	TMEM99	chr17	40819107	40836274	rs11332524:38967402:AT:A	40811150	40811151	1	2.16e-05	-0.369645	0.0859928	854416	Distal non-eGene
ENSG00000186395	KRT10	chr17	40818118	40822595	rs370892059:38987787:CT:C	40831535	40831536	1	2.85e-05	-0.353954	0.0836043	834031	Distal non-eGene
ENSG00000168259	DNAJC7	chr17	41976434	42021376	rs201418655:40484321:G:GC	42332303	42332303	0	3.25e-05	-3.89121	0.925802	91214	Distal non-eGene
ENSG00000197291	RAMP2-AS1	chr17	42753915	42761257	rs9892728:40913366:C:T	42761348	42761348	0	1.04e-10	-0.537686	0.0810028	-16299	Distal non-eGene
ENSG00000175906	ARL4D	chr17	43398960	43401137	rs75854888:41487451:G:A	43410083	43410083	0	1.57e-05	31.0935	7.11144	66115	Distal non-eGene
ENSG00000108786	HSD17B1	chr17	42549215	42555213	rs2880542:41491168:T:C	43413800	43413800	0	8.82e-06	-0.254788	0.0565877	62398	Distal non-eGene
ENSG00000175832	ETV4	chr17	43527845	43579620	rs1807204:41566969:T:G	43489601	43489601	0	8.58e-07	0.57863	0.115723	-100402	Distal non-eGene
ENSG00000260793	RP5-882C2.2	chr17	44221402	44223710	rs113844752:42297631:C:A	44220263	44220263	0	3.36e-12	-0.453474	0.0631374	95052	Distal non-eGene
ENSG00000108861	DUSP3	chr17	43766122	43778988	rs78397375:42377744:C:A	44300376	44300376	0	3.31e-05	-10.9434	2.60629	-70148	Distal non-eGene
ENSG00000267750	RUNDC3A-AS1	chr17	44299575	44315315	rs4793088:42380737:A:C	44303369	44303369	0	3.9e-25	1.04151	0.0938531	-73141	Distal non-eGene
ENSG00000013306	SLC25A39	chr17	44319626	44324870	rs3785818:42389278:G:C	44311910	44311910	0	1.66e-34	-0.859702	0.0636731	-113028	Distal non-eGene
ENSG00000108309	RUNDC3A	chr17	44308414	44318671	exm1328455	44320684	44320684	0	1.98e-07	1.601	0.302452	-121802	Distal non-eGene
ENSG00000013306	SLC25A39	chr17	44319626	44324870	exm1328469	44321434	44321434	1	9.86e-18	-0.942207	0.104803	-122552	Distal non-eGene
ENSG00000030582	GRN	chr17	44345087	44353102	rs850713:42427732:G:A	44350364	44350364	0	1.3e-05	-0.880987	0.199574	-151482	Distal non-eGene
ENSG00000161692	DBF4B	chr17	44708609	44752264	rs201390661:42770539:C:CA	44693171	44693171	2	1.52e-08	0.706085	0.122197	15437	Distal eGene
ENSG00000073670	ADAM11	chr17	44759032	44781846	rs8075210	44777242	44777242	0	1.32e-16	-0.57304	0.066298	122420	Distal non-eGene
ENSG00000214447	FAM187A	chr17	44899713	44905390	rs9912760:42939189:A:G	44861821	44861821	1	2.81e-09	0.491113	0.0807841	-102790	Distal non-eGene
ENSG00000167131	CCDC103	chr17	44899143	44905390	rs200519792:42948385:C:CA	44871017	44871017	0	4.8e-51	1.48274	0.0850766	-111986	Distal non-eGene
ENSG00000214447	FAM187A	chr17	44899713	44905390	rs200519792:42948385:C:CA	44871017	44871017	0	1.09e-50	1.47876	0.0852494	-111986	Distal non-eGene
ENSG00000167131	CCDC103	chr17	44899143	44905390	rs9904512:42981104:T:C	44903736	44903736	1	1.65e-09	0.464092	0.0751874	157373	Distal non-eGene
ENSG00000182963	GJC1	chr17	44798449	44830816	rs731333:42996709:A:G	44919341	44919341	0	1.97e-05	-0.229798	0.0531895	141768	Distal non-eGene
ENSG00000172992	DCAKD	chr17	45023341	45061109	rs4793173:43127715:A:C	45050347	45050347	0	1.31e-58	3.41968	0.178384	-133410	Distal non-eGene
ENSG00000181513	ACBD4	chr17	45132601	45144181	rs4986169:43207849:G:A	45130482	45130482	0	1.46e-07	0.773731	0.144559	-182771	Distal non-eGene
ENSG00000276728	AC142472.6	chr17	45146731	45148470	rs145004069:43222785:GAT:G	45145418	45145420	0	7.34e-07	-0.146056	0.0290245	16092	Distal non-eGene
ENSG00000141294	LRRC46	chr17	47831628	47837713	rs8078688:45919869:T:C	47842503	47842503	1	1.12e-07	-0.531553	0.0983649	39895	Distal non-eGene
ENSG00000141294	LRRC46	chr17	47831628	47837713	rs2325752	47844540	47844540	0	1.89e-12	-0.478173	0.0657698	37858	Distal non-eGene
ENSG00000264920	RP11-6N17.4	chr17	47891256	47895812	rs11654010	47883499	47883499	1	5.55e-09	-0.435954	0.0731537	-42166	Distal non-eGene
ENSG00000141295	SCRN2	chr17	47837693	47841333	rs139490969:45962994:C:T	47885628	47885628	1	2.44e-09	1.03279	0.169196	-44295	Distal eGene
ENSG00000170703	TTLL6	chr17	48762236	48817214	rs4793602:46879964:G:A	48802602	48802602	1	4.35e-06	0.328608	0.0705486	106381	Distal non-eGene
ENSG00000279792	RP11-893F2.18	chr17	50362968	50365232	rs11658398:47648261:C:A	49570899	49570899	0	3.47e-05	-0.155324	0.0370937	107335	Distal non-eGene
ENSG00000173714	WFIKKN2	chr17	50834651	50842348	rs4416057:48850234:G:A	50772873	50772873	0	3.42e-06	0.210102	0.0446077	75077	Distal non-eGene
ENSG00000229980	TOB1-AS1	chr17	50866680	50909737	rs12949115:48944345:C:A	50866984	50866984	0	1.81e-09	0.252719	0.0410496	77120	Distal non-eGene
ENSG00000247011	RP11-700H6.1	chr17	50934990	50944713	rs4794193:49024963:T:C	50947602	50947602	0	5.9e-17	-0.400177	0.0457248	-79624	Distal non-eGene
ENSG00000166263	STXBP4	chr17	54968728	55173632	exm2226765	54968815	54968815	1	6.65e-06	-1.25594	0.275126	542629	Distal non-eGene
ENSG00000261873	RP11-515E23.1	chr17	55448434	55511444	rs55824040:53587577:GTATGCATTCC:G	55510216	55510226	0	4.19e-74	1.07604	0.0473331	-541489	Distal non-eGene
ENSG00000261873	RP11-515E23.1	chr17	55448434	55511444	rs716391:53589444:T:C	55512083	55512083	1	1.38e-05	0.513016	0.116552	-543356	Distal non-eGene
ENSG00000121057	AKAP1	chr17	57085093	57121349	rs2230772:55183203:T:C	57105842	57105842	0	1.44e-09	-3.80632	0.614357	728907	Distal non-eGene
ENSG00000108389	MTMR4	chr17	58489530	58517905	rs877070:55713392:C:A	57636031	57636031	0	1.98e-06	2.26402	0.469107	-380180	Distal non-eGene
ENSG00000180891	CUEDC1	chr17	57861244	57955323	rs73329834:55940910:A:G	57863549	57863549	0	1.08e-05	-2.6485	0.594307	124710	Distal non-eGene
ENSG00000136451	VEZF1	chr17	57971548	57988259	rs11413908:56002479:T:TA	57925118	57925118	1	3.04e-05	-0.361671	0.0857273	30205	Distal non-eGene
ENSG00000136451	VEZF1	chr17	57971548	57988259	rs72839919:56053780:C:A	57976419	57976419	0	4.65e-06	-0.761488	0.163996	-126363	Distal non-eGene
ENSG00000108387	SEPTIN4	chr17	58520251	58540818	rs9915325:56524306:T:C	58446945	58446945	0	2.43e-13	-57.796	7.62508	-118185	Distal non-eGene
ENSG00000068097	HEATR6	chr17	60043195	60078931	rs2627907:58218881:A:C	60141520	60141520	0	9.77e-08	2.85962	0.526611	294476	Distal non-eGene
ENSG00000146872	TLK2	chr17	62458659	62615481	exm-rs2251393	62701571	62701571	0	2.72e-05	-1.53214	0.360906	266978	Distal non-eGene
ENSG00000170921	TANC2	chr17	63009557	63427699	17:61043479:A:ACCACGCACGCGCCC	62966118	62966118	0	1.57e-10	2.19142	0.333583	-338717	Distal non-eGene
ENSG00000075461	CACNG4	chr17	66964911	67033398	rs6504469:64892984:G:T	66896867	66896867	1	3.91e-05	0.298772	0.0718397	-594231	Distal non-eGene
ENSG00000278740	RP11-147L13.14	chr17	68188548	68189165	rs17670925:66187218:C:G	68191077	68191077	0	6.98e-14	0.574353	0.0739871	222546	Distal non-eGene
ENSG00000141337	ARSG	chr17	68259183	68422731	rs11368011:66261853:GT:G	68265712	68265713	0	8.67e-08	-1.11784	0.204991	-6530	Distal eGene
ENSG00000108932	SLC16A6	chr17	68267027	68291267	rs11368011:66261853:GT:G	68265712	68265713	0	1.91e-14	-0.528206	0.0664357	-6530	Distal non-eGene
ENSG00000070540	WIPI1	chr17	68420949	68457513	rs12939053:66391826:C:A	68395685	68395685	1	6.26e-10	0.498312	0.0786187	-136503	Distal non-eGene
ENSG00000070540	WIPI1	chr17	68420949	68457513	rs78095701:66443609:A:C	68447468	68447468	0	7.43e-26	-1.1197	0.0991742	-188286	Distal non-eGene
ENSG00000133195	SLC39A11	chr17	72645950	73092712	rs8071840	72725568	72725568	0	1.11e-06	-0.330461	0.0667972	367144	Distal eGene
ENSG00000133193	FAM104A	chr17	73207354	73236753	rs1052705:71192468:C:T	73196329	73196329	0	4.69e-28	-2.27285	0.191484	40424	Distal eGene
ENSG00000166685	COG1	chr17	73192633	73208507	rs2278793:71196359:A:G	73200220	73200220	0	4.51e-10	0.467848	0.0731719	-107508	Distal non-eGene
ENSG00000166685	COG1	chr17	73192633	73208507	rs113467507:71226206:C:T	73230067	73230067	1	1.84e-05	0.54542	0.125801	-65090	Distal non-eGene
ENSG00000125450	NUP85	chr17	75205660	75235758	rs11657106	75208042	75208042	0	1.41e-69	-5.90293	0.272165	54321	Distal non-eGene
ENSG00000167881	SRP68	chr17	76038776	76072653	17:73318453:CA:C	75322372	75322373	0	2.99e-05	2.28608	0.541374	83337	Distal non-eGene
ENSG00000257949	TEN1	chr17	75979221	76000586	rs2069528	76001393	76001393	0	3.03e-22	0.551043	0.0534762	306605	Distal non-eGene
ENSG00000185262	UBALD2	chr17	76265203	76271299	rs111375686:74272212:C:CACCCACCCA	76276131	76276131	0	2.36e-10	-0.538486	0.0828153	-154555	Distal non-eGene
ENSG00000129646	QRICH2	chr17	76274050	76307998	rs62086312:74281645:G:A	76285564	76285564	0	5.32e-14	-0.52381	0.067133	-306344	Distal non-eGene
ENSG00000161542	PRPSAP1	chr17	76309487	76384521	rs12603578:74296079:C:T	76299998	76299998	0	4.92e-26	-0.769216	0.0678455	-320767	Distal non-eGene
ENSG00000129646	QRICH2	chr17	76274050	76307998	rs8068457:74300916:G:C	76304835	76304835	1	9.6e-06	0.962088	0.214581	-183259	Distal non-eGene
ENSG00000214140	PRCD	chr17	76527587	76553578	rs4648340:74542217:C:T	76546135	76546135	0	1.44e-16	0.667374	0.0773167	164881	Distal non-eGene
ENSG00000267543	RP11-666A8.7	chr17	76549952	76550826	rs4648340:74542217:C:T	76546135	76546135	0	5.54e-40	6.3681	0.429368	164881	Distal non-eGene
ENSG00000163597	SNHG16	chr17	76557767	76565348	rs16967307	76577450	76577450	0	2.15e-22	-0.924352	0.0893438	-19684	Distal eGene
ENSG00000070731	ST6GALNAC2	chr17	76565380	76586956	rs16967307	76577450	76577450	0	4.44e-40	-14.5106	0.976867	-19684	Distal non-eGene
ENSG00000070495	JMJD6	chr17	76712833	76726799	rs2240774:74710572:T:C	76714490	76714490	0	8.29e-13	-0.511302	0.0691344	-163315	Distal non-eGene
ENSG00000108669	CYTH1	chr17	78674049	78782297	rs7501592:76619883:G:A	78623801	78623801	0	6.62e-07	-4.07905	0.807222	158496	Distal eGene
ENSG00000187775	DNAH17	chr17	78423698	78577394	rs11077385:76620073:A:G	78623991	78623991	0	3.73e-20	8.58948	0.884705	158306	Distal non-eGene
ENSG00000267123	CTD-2357A8.3	chr17	78617390	78632057	rs55691740:76622050:T:G	78625968	78625968	0	4.6e-54	-1.02489	0.056545	156329	Distal non-eGene
ENSG00000167280	ENGASE	chr17	79074940	79088599	exm1362197	79081987	79081987	0	1.39e-34	-1.59421	0.117909	434161	Distal non-eGene
ENSG00000167280	ENGASE	chr17	79074940	79088599	rs3744189:77078451:C:T	79082369	79082369	1	4.25e-13	0.771122	0.102869	433779	Distal non-eGene
ENSG00000167280	ENGASE	chr17	79074940	79088599	rs55957611:77714796:C:T	79740997	79740997	2	3.88e-06	0.473198	0.101047	294851	Distal non-eGene
ENSG00000224877	C17orf89	chr17	81239240	81241281	rs3803767	81252562	81252562	0	3.44e-07	0.627743	0.121079	229008	Distal non-eGene
ENSG00000185359	HGS	chr17	81683327	81703138	rs80017337:79669884:GGGAA:G	81702854	81702858	1	1.04e-05	-0.423989	0.0949499	187936	Distal non-eGene
ENSG00000185527	PDE6G	chr17	81650460	81663112	rs3204270:79682051:C:T	81715021	81715021	0	1.49e-06	128.614	26.3237	145673	Distal non-eGene
ENSG00000185624	P4HB	chr17	81843160	81860694	rs4073929:79702318:G:A	81735288	81735288	0	2.56e-05	4.24854	0.997615	98014	Distal non-eGene
ENSG00000175711	B3GNTL1	chr17	82942156	83051810	rs4789838:80706127:G:A	82748251	82748251	2	5.66e-05	0.376365	0.0924705	-99698	Distal non-eGene
ENSG00000167363	FN3K	chr17	82735576	82751197	rs35166088:80706378:CT:C	82748502	82748503	0	2.21e-10	1.68449	0.258633	-99949	Distal non-eGene
ENSG00000101577	LPIN2	chr18	2916995	3013315	rs16944040:2919634:T:G	2919636	2919636	0	1.21e-08	-3.39025	0.582537	270761	Distal non-eGene
ENSG00000101608	MYL12A	chr18	3247482	3256236	rs3786457:3254658:C:T	3254660	3254660	0	2.01e-07	-1.87205	0.353835	-241345	Distal non-eGene
ENSG00000272688	RP13-270P17.3	chr18	3246402	3247086	rs6506090:3254795:G:A	3254797	3254797	0	9.91e-07	0.151889	0.0305571	-241482	Distal non-eGene
ENSG00000101605	MYOM1	chr18	3066808	3220108	exm2227787	3262786	3262786	0	4.12e-07	0.656535	0.127519	-249471	Distal non-eGene
ENSG00000272788	RP11-674N23.4	chr18	8801657	8802305	rs62086598:8800095:G:A	8800097	8800097	0	1.26e-08	-0.189263	0.0325642	-92476	Distal non-eGene
ENSG00000168502	MTCL1	chr18	8705662	8832778	rs632423:8809445:G:C	8809447	8809447	0	1.63e-26	-20.6987	1.80538	-101826	Distal non-eGene
ENSG00000101558	VAPA	chr18	9914003	9960021	rs9973082:9952527:T:C	9952530	9952530	0	2.6e-07	-1.99681	0.381062	573375	Distal non-eGene
ENSG00000154856	APCDD1	chr18	10454629	10489948	rs10502395:10492023:C:A	10492026	10492026	0	1.15e-05	0.460992	0.103749	-578024	Distal non-eGene
ENSG00000085415	SEH1L	chr18	12947134	12987536	rs76754131:12895415:T:C	12895416	12895416	1	8.16e-06	-0.582154	0.128803	-145348	Distal non-eGene
ENSG00000101654	RNMT	chr18	13726661	13764558	rs9966366:13828036:A:C	13828037	13828037	0	4.82e-05	0.418207	0.101783	304453	Distal non-eGene
ENSG00000141446	ESCO1	chr18	21529282	21600884	rs4328539:19286470:G:A	21706509	21706509	0	1.5e-07	0.986216	0.184429	-1552	Promoter non-eGene
ENSG00000141447	OSBPL1A	chr18	24162045	24397880	rs10609672:21687250:AAC:A	24107286	24107288	0	2.17e-05	-0.364027	0.0847144	-114513	Distal non-eGene
ENSG00000168234	TTC39C	chr18	23992774	24135610	rs894928:21694225:T:C	24114261	24114261	0	5.01e-19	-39.9756	4.26244	-121488	Distal eGene
ENSG00000134779	TPGS2	chr18	36777648	36829216	rs58683356:34389391:T:C	36809428	36809428	1	4.98e-07	0.481949	0.0943062	-741852	Distal non-eGene
ENSG00000267707	RP11-95O2.5	chr18	37243777	37247506	rs56176314:34393398:G:A	36813435	36813435	0	1.25e-11	-0.335342	0.0480606	-745859	Distal non-eGene
ENSG00000132872	SYT4	chr18	43267879	43277650	rs72902415:40859176:A:T	43279211	43279211	0	8.66e-09	-0.746855	0.12702	-1119928	Distal non-eGene
ENSG00000152240	HAUS1	chr18	46104333	46128333	rs1123604:43245315:G:T	45665350	45665350	1	7.22e-07	-0.504871	0.100265	301924	Distal non-eGene
ENSG00000134049	IER3IP1	chr18	47152999	47176374	rs117132538:44763045:C:T	47236674	47236674	1	3.75e-09	-1.26922	0.210529	694472	Distal non-eGene
ENSG00000101670	LIPG	chr18	49560700	49599182	rs17714731:47435213:G:C	49908843	49908843	0	8.35e-06	2.21794	0.491279	286250	Distal non-eGene
ENSG00000167306	MYO5B	chr18	49822814	50195093	rs9963529:47498874:T:G	49972504	49972504	0	9.63e-13	0.56842	0.077093	222589	Distal eGene
ENSG00000267322	SNHG22	chr18	49814024	49851059	rs9949712:47677840:T:C	50151470	50151470	2	1.96e-05	-0.298148	0.0690043	43623	Distal non-eGene
ENSG00000134042	MRO	chr18	50795121	50825402	rs17663355:48344498:G:T	50818128	50818128	0	2.93e-13	0.699016	0.0925644	149891	Distal non-eGene
ENSG00000166569	CPLX4	chr18	59275157	59318649	rs4940875:57130569:C:T	59463337	59463337	1	3.77e-05	-0.381387	0.0915138	357703	Distal non-eGene
ENSG00000081913	PHLPP1	chr18	62715451	62980433	rs187210763:60383787:T:G	62716554	62716554	0	3.12e-07	6.3167	1.2138	-1104	Promoter eGene
ENSG00000176225	RTTN	chr18	70003794	70205945	rs5825989:67751466:TA:T	70084230	70084231	0	2.12e-07	-3.11867	0.590687	-1369021	Distal non-eGene
ENSG00000101493	ZNF516	chr18	76358191	76495190	rs9958877:74304628:C:T	76592671	76592671	0	5.25e-07	-0.357407	0.0700777	-97481	Distal eGene
ENSG00000099804	CDC34	chr19	531713	542092	rs17672563	539871	539871	0	1.02e-10	1.82015	0.274115	32357	Distal non-eGene
ENSG00000065268	WDR18	chr19	984272	998438	rs7249037	988136	988136	1	2.85e-08	0.49914	0.0881545	-191061	Distal non-eGene
ENSG00000267283	AC005306.3	chr19	1989402	1990370	rs143177112:1048691:C:T	1048692	1048692	0	1.73e-06	0.562181	0.115806	-8591	Distal non-eGene
ENSG00000115266	APC2	chr19	1446303	1473244	rs12005	1457876	1457876	0	3.14e-21	4.06173	0.405465	-50307	Distal non-eGene
ENSG00000130270	ATP8B3	chr19	1782076	1812276	rs10418560:1812204:G:A	1812205	1812205	0	3.11e-11	0.51464	0.0753195	-244147	Distal non-eGene
ENSG00000172081	MOB3A	chr19	2071039	2096673	rs62128365:2070785:C:G	2070786	2070786	0	1.62e-07	-0.691478	0.129656	-165572	Distal non-eGene
ENSG00000105278	ZFR2	chr19	3804025	3869032	rs873283:3817699:A:C	3817701	3817701	0	8.07e-12	1.6873	0.239468	-55037	Distal non-eGene
ENSG00000077463	SIRT6	chr19	4174110	4182604	rs3760907:4183155:T:G	4183158	4183158	0	3.67e-10	0.533025	0.0829192	-197689	Distal non-eGene
ENSG00000167674	CTB-50L17.10	chr19	4472288	4502211	rs11673585:4473053:G:C	4473056	4473056	0	5.95e-06	-1.00529	0.219033	-15234	Distal non-eGene
ENSG00000141965	FEM1A	chr19	4791682	4801273	rs3214271:4794948:A:AAACCTCAC	4794936	4794936	0	1.87e-12	-1.31582	0.180929	-70263	Distal non-eGene
ENSG00000031823	RANBP3	chr19	5916140	5978142	rs10418425:5058357:C:G	5058346	5058346	0	1.15e-05	-1.19732	0.269457	-89233	Distal non-eGene
ENSG00000141994	DUS3L	chr19	5784833	5791238	rs368649123:5808768:CTT:C	5808757	5808759	1	3.61e-07	-0.498751	0.0963756	38710	Distal non-eGene
ENSG00000156413	FUT6	chr19	5830611	5839731	rs72263148:5820276:CA:C	5820265	5820266	0	2.96e-10	-0.51297	0.0793558	27202	Distal non-eGene
ENSG00000267709	AC024592.9	chr19	5847468	5858239	rs55669463:5855329:G:T	5855318	5855318	0	4.75e-06	-0.187856	0.0404966	-31516	Distal non-eGene
ENSG00000174886	NDUFA11	chr19	5891277	5904006	rs141026056:5938908:AT:A	5938897	5938898	0	6.61e-08	-1.20635	0.219145	39245	Distal non-eGene
ENSG00000105519	CAPS	chr19	5911708	5916208	rs434040:5984815:T:C	5984804	5984804	0	7.83e-12	-0.622386	0.0882712	-199185	Distal non-eGene
ENSG00000125656	CLPP	chr19	6361453	6368908	rs200468017:6393565:T:TG	6393554	6393554	0	7.02e-07	1.45169	0.28797	-21121	Distal non-eGene
ENSG00000130544	ZNF557	chr19	7069445	7087968	rs12972698:7110864:A:G	7110853	7110853	0	7.48e-06	-0.754392	0.166198	238090	Distal non-eGene
ENSG00000125650	PSPN	chr19	6375149	6379058	rs11260009:7429288:A:C	7364402	7364402	0	8.35e-06	-0.246846	0.0546772	-70368	Distal non-eGene
ENSG00000198723	C19orf45	chr19	7492977	7508450	rs117726621:7744183:C:T	7679297	7679297	0	5.95e-06	1.11799	0.243591	-145293	Distal non-eGene
ENSG00000104980	TIMM44	chr19	7926719	7943920	rs12979921:8013679:A:G	7948794	7948794	0	5.52e-20	3.12816	0.323844	257942	Distal non-eGene
ENSG00000133246	PRAM1	chr19	8490057	8503112	rs73002688:8576947:G:T	8512063	8512063	0	8.92e-06	-0.227706	0.0506034	-66466	Distal non-eGene
ENSG00000130811	EIF3G	chr19	10115018	10119918	rs2010353:10222558:G:T	10111882	10111882	0	6.03e-09	-1.18317	0.199033	-175330	Distal non-eGene
ENSG00000090339	ICAM1	chr19	10270836	10286615	rs45504492:10370639:G:A	10259963	10259963	0	5.07e-12	-1.48792	0.209019	-323411	Distal non-eGene
ENSG00000090339	ICAM1	chr19	10270836	10286615	rs45504492:10370639:G:A	10259963	10259963	1	5.07e-12	-1.48792	0.209019	-323411	Distal non-eGene
ENSG00000129347	KRI1	chr19	10553079	10566037	rs148172637:10681823:C:T	10571147	10571147	0	1.48e-19	6.23242	0.653702	31310	Distal non-eGene
ENSG00000129353	SLC44A2	chr19	10602458	10644559	rs145634406:10709991:C:A	10599315	10599315	0	2.2e-08	-9.53582	1.66999	3142	Distal eGene
ENSG00000278897	AC020951.1	chr19	11856033	11858302	rs2311783:11995426:C:G	11884611	11884611	0	2.77e-07	1.05545	0.201888	103006	Distal non-eGene
ENSG00000171291	ZNF439	chr19	11848727	11883750	rs79001645:12030641:C:G	11919826	11919826	0	3.65e-05	-1.17402	0.281158	67791	Distal non-eGene
ENSG00000197054	ZNF763	chr19	11965038	11980381	rs3865485:12071416:GTTT:G	11960601	11960604	0	1.24e-11	-2.0005	0.286678	179806	Distal non-eGene
ENSG00000223547	ZNF844	chr19	12064700	12081565	rs73514817:12176709:T:C	12065894	12065894	0	1.61e-05	-3.29374	0.754237	-140826	Distal non-eGene
ENSG00000180855	ZNF443	chr19	12429708	12441112	rs74482662:13392333:C:A	13281519	13281519	2	1.65e-05	-1.05387	0.241644	351506	Distal non-eGene
ENSG00000141837	CACNA1A	chr19	13206443	13633025	rs12982748:13705850:C:A	13595036	13595036	1	1.45e-05	0.439602	0.100136	37989	Distal eGene
ENSG00000105135	ILVBL	chr19	15114985	15125785	rs3214220:15219797:TC:T	15108986	15108987	1	3.48e-05	-0.37228	0.0889126	399507	Distal non-eGene
ENSG00000105127	AKAP8	chr19	15353386	15379798	rs3826863:15529020:A:G	15418209	15418209	0	3.41e-05	-0.86616	0.20664	-85664	Distal non-eGene
ENSG00000053501	USE1	chr19	17215347	17219829	rs388484:17326567:A:T	17215758	17215758	0	3.7e-06	0.39472	0.0841047	-140133	Distal non-eGene
ENSG00000099330	OCEL1	chr19	17226205	17229219	rs3745163:17337555:C:A	17226746	17226746	1	6.43e-13	0.606272	0.0815537	-151121	Distal non-eGene
ENSG00000099330	OCEL1	chr19	17226205	17229219	rs7258100:17340400:C:T	17229591	17229591	0	2.63e-22	-1.07924	0.10456	-153966	Distal non-eGene
ENSG00000160117	ANKLE1	chr19	17281646	17287646	rs73509996:17393449:T:G	17282640	17282640	0	1.51e-19	0.350158	0.0367349	-207015	Distal non-eGene
ENSG00000130312	MRPL34	chr19	17292610	17306843	rs7252571:17419848:T:C	17309039	17309039	0	1.32e-27	1.45593	0.123886	25790	Distal non-eGene
ENSG00000171773	NXNL1	chr19	17455426	17460954	rs73020413:17578930:A:G	17468121	17468121	0	1.28e-18	-0.798136	0.0862172	-7317	Distal non-eGene
ENSG00000269736	CTD-2521M24.11	chr19	17452212	17452969	rs8109373	17469175	17469175	0	4.43e-13	-0.665319	0.0888275	-8371	Distal non-eGene
ENSG00000051128	HOMER3	chr19	18929202	18941261	rs145630875:18108071:G:A	17997262	17997262	0	8.22e-07	1.82165	0.363682	-64246	Distal non-eGene
ENSG00000130303	BST2	chr19	17402940	17405648	rs8107255:18369585:G:C	18258775	18258775	0	6.37e-08	1.52504	0.276692	-160982	Distal non-eGene
ENSG00000130518	KIAA1683	chr19	18257098	18274509	rs62120440:18395112:G:A	18284302	18284302	0	4.77e-25	-0.684444	0.0618083	38972	Distal non-eGene
ENSG00000130518	KIAA1683	chr19	18257098	18274509	rs115517891:18406228:G:A	18295418	18295418	1	9.8e-14	-0.522569	0.0677486	27856	Distal non-eGene
ENSG00000130517	PGPEP1	chr19	18340588	18369950	rs12977772:18675145:G:T	18564335	18564335	2	1.68e-05	0.407531	0.0935372	370062	Distal non-eGene
ENSG00000221983	UBA52	chr19	18571731	18577550	rs55896114:18681008:C:CT	18570198	18570198	0	9.42e-07	-0.348311	0.0699286	-48071	Distal non-eGene
ENSG00000105696	TMEM59L	chr19	18607431	18621039	rs7247346:18707878:A:C	18597068	18597068	0	1.97e-09	-1.40539	0.228848	234870	Distal non-eGene
ENSG00000184635	ZNF93	chr19	19900914	19935575	exm1448737	19934123	19934123	0	7.83e-06	-0.749646	0.165524	-417896	Distal non-eGene
ENSG00000267481	CTC-559E9.5	chr19	19788756	19790531	rs11372918:20151069:T:TA	20040260	20040260	0	9.69e-06	0.201407	0.0449433	3993145	Distal non-eGene
ENSG00000105176	URI1	chr19	29923645	30016608	rs11668765:30363607:C:T	29872700	29872700	1	2.35e-06	0.339358	0.0708492	355590	Distal non-eGene
ENSG00000257103	LSM14A	chr19	34172505	34229515	rs1260556:34640354:G:A	34149449	34149449	0	7.11e-19	-6.73981	0.722115	-527494	Distal non-eGene
ENSG00000271109	CTC-523E23.11	chr19	34849279	34860576	rs749981	34849062	34849062	0	1.58e-16	0.187656	0.0217735	145722	Distal non-eGene
ENSG00000089351	GRAMD1A	chr19	34994785	35026471	rs66479581:35501795:G:A	35010891	35010891	0	1.91e-08	-1.01104	0.176248	-173002	Distal non-eGene
ENSG00000105258	POLR2I	chr19	36113711	36115346	rs4806265:36578282:A:G	36087380	36087380	0	1.59e-18	0.599888	0.0649965	-32499	Distal non-eGene
ENSG00000105254	TBCB	chr19	36114290	36125947	rs79831274:36612994:G:A	36122092	36122092	0	1.18e-06	3.62248	0.734029	51761	Distal non-eGene
ENSG00000267605	CTD-3220F14.1	chr19	37265940	37271518	rs476194:37410733:T:C	36919831	36919831	0	3.95e-07	-0.369919	0.0717335	298322	Distal non-eGene
ENSG00000189164	ZNF527	chr19	37371062	37393066	rs71934524:37707988:C:CA	37217086	37217086	0	9.5e-05	-0.533977	0.13543	-300795	Distal non-eGene
ENSG00000267640	CTD-2554C21.2	chr19	37817360	37832160	rs11671972:37863626:T:G	37372724	37372724	1	8.51e-07	0.376674	0.0753068	96551	Distal non-eGene
ENSG00000266916	ZNF793-AS1	chr19	37497160	37507046	rs7248733:37996361:A:C	37505459	37505459	0	1.02e-10	-0.596569	0.08985	-192622	Distal non-eGene
ENSG00000063322	MED29	chr19	39391304	39400637	rs11083522:39901611:T:C	39410971	39410971	0	6.21e-09	-1.80722	0.304287	-19668	Distal eGene
ENSG00000267107	PCAT19	chr19	41454170	41500649	rs139801278:41249295:G:A	40743390	40743390	1	1.14e-05	-0.859863	0.193461	-26287	Distal non-eGene
ENSG00000105341	ATP5SL	chr19	41431319	41440717	rs60285872:41902522:CTTTT:C	41396617	41396621	0	1.38e-08	1.08531	0.187246	44100	Distal eGene
ENSG00000142046	TMEM91	chr19	41350912	41384083	rs45500792:41903699:T:G	41397794	41397794	0	1.09e-06	-0.428171	0.0864955	42923	Distal non-eGene
ENSG00000105372	RPS19	chr19	41859919	41872926	rs12972552:42368016:G:A	41863946	41863946	0	4.28e-05	2.914	0.704303	95444	Distal non-eGene
ENSG00000105323	HNRNPUL1	chr19	41262497	41307598	rs78776424:42477569:T:C	41973417	41973417	0	1.45e-06	-9.66646	1.97593	24080	Distal non-eGene
ENSG00000073050	XRCC1	chr19	43543041	43580473	rs4802181:43971251:T:C	43467099	43467099	1	5.74e-08	-0.416948	0.0753757	37836	Distal non-eGene
ENSG00000073050	XRCC1	chr19	43543041	43580473	rs2682586:44081499:A:G	43577347	43577347	0	1.09e-09	-0.511245	0.0818813	15689	Distal non-eGene
ENSG00000226763	SRRM5	chr19	43596618	43614497	rs7245651:44125325:C:G	43621173	43621173	0	2.13e-06	0.25207	0.0523978	-95676	Distal non-eGene
ENSG00000263002	ZNF234	chr19	44141558	44160309	rs4802210	44141595	44141595	0	1.56e-05	0.470087	0.10748	-38	Promoter eGene
ENSG00000266921	RP11-15A1.7	chr19	43996897	44002836	rs846850:45072295:T:A	44569049	44569049	0	3.98e-05	0.315255	0.0758809	149710	Distal non-eGene
ENSG00000142252	GEMIN7	chr19	45079196	45091524	rs3178166:45594170:A:G	45090912	45090912	0	1.04e-16	-0.443772	0.0511514	-11624	Distal non-eGene
ENSG00000117877	CD3EAP	chr19	45406210	45410766	rs34014819:45909634:G:T	45406376	45406376	0	6.33e-06	0.684288	0.149539	72452	Distal non-eGene
ENSG00000012061	ERCC1	chr19	45407334	45478828	rs2298881:45926916:C:A	45423658	45423658	0	6.61e-10	-0.698913	0.110431	55170	Distal eGene
ENSG00000125741	OPA3	chr19	45527428	45602212	rs7259298:46082384:C:T	45579126	45579126	0	4.51e-14	0.566238	0.0723495	23086	Distal eGene
ENSG00000267757	EML2-AS1	chr19	45641495	45642840	rs6509227:46141677:A:G	45638419	45638419	0	2.55e-35	1.17603	0.0858288	-131840	Distal non-eGene
ENSG00000012061	ERCC1	chr19	45407334	45478828	rs79775625:46576300:A:G	46073042	46073042	1	3.4e-05	1.09204	0.260498	-45388	Distal non-eGene
ENSG00000268460	AC006262.6	chr19	46203427	46214837	rs142448776:46736926:G:A	46233669	46233669	0	1.96e-24	5.34461	0.489975	-206015	Distal non-eGene
ENSG00000090372	STRN4	chr19	46719508	46746994	rs12984041:47249296:G:C	46746039	46746039	0	3.32e-12	1.37557	0.191473	104953	Distal non-eGene
ENSG00000197405	C5AR1	chr19	47290024	47322066	rs1035390:47763127:T:C	47259870	47259870	0	6.1e-15	-0.932509	0.114943	-3890	Distal non-eGene
ENSG00000257704	INAFM1	chr19	47274454	47275707	rs888836	47271515	47271515	0	3.05e-07	0.66571	0.127812	-15535	Distal non-eGene
ENSG00000063169	GLTSCR1	chr19	47608197	47703277	rs2059877:48188809:G:T	47685552	47685552	0	6.1e-07	-0.491846	0.097021	-213384	Distal non-eGene
ENSG00000024422	EHD2	chr19	47713344	47743134	rs376203073:48289471:CTT:C	47786214	47786216	0	1.07e-05	-0.762631	0.171013	-17374	Distal non-eGene
ENSG00000105392	CRX	chr19	47819780	47843330	rs12974951	47842671	47842671	0	1.39e-11	-47.4068	6.81023	-22892	Distal eGene
ENSG00000169393	ELSPBP1	chr19	47994652	48025153	rs16982100:48511888:T:G	48008631	48008631	1	2.83e-06	0.73606	0.154948	35422	Distal non-eGene
ENSG00000188334	BSPH1	chr19	47968047	47992170	rs35439716:48513045:AT:A	48009788	48009789	0	1.19e-22	0.477997	0.0458852	34265	Distal non-eGene
ENSG00000105507	CABP5	chr19	48029954	48044053	rs201980175:48514705:T:TGAC	48011448	48011448	0	5.58e-54	-1.33708	0.0738472	32605	Distal eGene
ENSG00000269420	PLA2G4C-AS1	chr19	48061372	48064945	rs201980175:48514705:T:TGAC	48011448	48011448	0	2.03e-32	-1.08455	0.0835369	-16797	Distal non-eGene
ENSG00000105499	PLA2G4C	chr19	48047844	48110817	rs186856015:48519804:C:T	48016547	48016547	0	1.51e-07	-0.563799	0.105462	94270	Distal eGene
ENSG00000169393	ELSPBP1	chr19	47994652	48025153	rs28412366:48519925:A:G	48016668	48016668	0	4.35e-43	-1.18439	0.076071	94149	Distal non-eGene
ENSG00000105507	CABP5	chr19	48029954	48044053	rs141506489:48546432:A:AT	48043175	48043175	1	2.36e-07	0.374118	0.0711386	-48524	Distal non-eGene
ENSG00000269420	PLA2G4C-AS1	chr19	48061372	48064945	rs111764697:48603997:T:C	48100740	48100740	1	1.51e-05	0.44883	0.102444	-108570	Distal non-eGene
ENSG00000105486	LIG1	chr19	48115446	48170603	rs3731034:48623440:G:A	48120183	48120183	0	1.39e-21	-1.73493	0.171468	50420	Distal eGene
ENSG00000105483	CARD8	chr19	48180771	48255946	exm-IND19-53426829	48231760	48231760	1	1.38e-13	-1.02582	0.133862	-345363	Distal non-eGene
ENSG00000105483	CARD8	chr19	48180771	48255946	rs1421674:48757460:T:C	48254203	48254203	0	5.08e-21	0.808144	0.0811543	-262033	Distal non-eGene
ENSG00000161558	TMEM143	chr19	48332357	48364237	rs275582:48850344:C:G	48347087	48347087	0	2.33e-05	0.326767	0.0763251	204988	Distal non-eGene
ENSG00000105443	CYTH2	chr19	48469033	48482314	rs34527214:48985178:TA:T	48481921	48481922	0	1.31e-15	0.894168	0.107368	-36148	Distal non-eGene
ENSG00000105438	KDELR1	chr19	48382571	48391553	rs10411546:49097254:G:A	48593997	48593997	0	7.17e-06	3.68324	0.809756	-229760	Distal non-eGene
ENSG00000104805	NUCB1	chr19	48900051	48923372	rs10408888:49340998:T:C	48837741	48837741	0	1.07e-05	-1.76075	0.39492	-191429	Distal non-eGene
ENSG00000087076	HSD17B14	chr19	48813018	48836678	rs79187430:49359958:G:A	48856701	48856701	0	5.75e-06	1.0722	0.233227	-218630	Distal non-eGene
ENSG00000268465	CTC-273B12.7	chr19	48465838	48472431	rs141649004:49630125:G:A	49126868	49126868	0	7.19e-06	0.584585	0.128544	-7479	Distal non-eGene
ENSG00000161609	CCDC155	chr19	49388219	49417994	rs12980220:49889005:A:G	49385748	49385748	0	1.32e-15	0.635998	0.0763709	56612	Distal non-eGene
ENSG00000104888	SLC17A7	chr19	49429402	49442360	rs11673671:49943948:G:C	49440691	49440691	0	1.77e-11	-32.1869	4.64996	-52610	Distal non-eGene
ENSG00000105357	MYH14	chr19	50188187	50310545	rs72337134:50077114:AT:A	49573857	49573858	0	1.27e-05	2.68975	0.608455	-77492	Distal non-eGene
ENSG00000126456	IRF3	chr19	49659570	49665875	rs7258381:50153041:C:T	49649784	49649784	1	1.17e-05	0.524776	0.118231	16091	Distal eGene
ENSG00000126456	IRF3	chr19	49659570	49665875	exm1491798	49664469	49664469	0	5.18e-43	1.14756	0.0737897	-24268	Distal non-eGene
ENSG00000169169	CPT1C	chr19	49690899	49713731	rs1075453:50194399:G:C	49691142	49691142	0	1.05e-15	-0.563947	0.0674634	72188	Distal non-eGene
ENSG00000039650	PNKP	chr19	49859883	49878351	rs11365269:50371262:CT:C	49868005	49868006	1	5.75e-06	0.341392	0.0742639	-50629	Distal non-eGene
ENSG00000161671	EMC10	chr19	50476401	50490870	rs10413690:51018126:G:A	50514869	50514869	0	5.75e-08	1.72131	0.311201	294005	Distal non-eGene
ENSG00000167757	KLK11	chr19	51022217	51028039	rs75294470:51309042:T:C	50805785	50805785	0	7.83e-06	0.320801	0.0708329	-294432	Distal non-eGene
ENSG00000167747	C19orf48	chr19	50797705	50804929	rs62115583:51309048:T:C	50805791	50805791	0	7.11e-08	0.343276	0.0625176	-294438	Distal non-eGene
ENSG00000129451	KLK10	chr19	51012740	51020175	rs2569451:51520200:C:T	51016944	51016944	0	5.82e-22	-0.305796	0.0299072	91426	Distal non-eGene
ENSG00000197497	ZNF665	chr19	53159214	53193386	rs77069861:53696811:A:C	53193558	53193558	0	2.05e-05	0.197347	0.0457798	137117	Distal non-eGene
ENSG00000269001	CTD-2245F17.3	chr19	53197112	53214522	rs8103620	53194684	53194684	0	3.74e-31	-0.756679	0.0597492	135991	Distal non-eGene
ENSG00000203326	ZNF525	chr19	53330676	53392217	rs12978480:53868816:A:T	53365563	53365563	0	1.31e-12	1.56278	0.213309	-168452	Distal non-eGene
ENSG00000241015	TPM3P9	chr19	53431985	53444670	rs140539137:53927101:ACCTCCTGATCCCC:A	53423848	53423861	3	6.82e-06	-0.613346	0.134524	317465	Distal non-eGene
ENSG00000179954	SSC5D	chr19	55488405	55519098	rs4405662:55999993:A:G	55488626	55488626	1	4.9e-07	-0.40821	0.0798237	-222	Promoter eGene
ENSG00000179954	SSC5D	chr19	55488405	55519098	rs62130160:56000896:G:T	55489529	55489529	0	5.75e-52	1.16663	0.0661301	-1125	Promoter eGene
ENSG00000213015	ZNF580	chr19	55635017	55643469	rs34506180:56154518:GTTT:G	55643152	55643155	0	1.43e-28	-1.39541	0.116249	-154748	Distal non-eGene
ENSG00000267454	ZNF582-AS1	chr19	56393657	56399172	rs12608966:56907816:C:T	56396447	56396447	0	5.7e-33	-0.929851	0.0708692	-4447313	Distal non-eGene
ENSG00000178935	ZNF552	chr19	57803842	57814913	rs71986625:58285897:TATAA:T	57774529	57774533	0	1.12e-05	0.427987	0.0961914	-4874	Distal non-eGene
ENSG00000179909	ZNF154	chr19	57697368	57709194	rs73068539:58326149:C:T	57814781	57814781	1	1.86e-05	1.13638	0.262261	-45126	Distal non-eGene
ENSG00000173480	ZNF417	chr19	57900297	57916610	rs28374851:58361328:G:C	57849960	57849960	0	1.55e-38	2.772	0.191388	-250075	Distal non-eGene
ENSG00000176293	ZNF135	chr19	58059240	58086310	exm1515579	58061611	58061611	1	1.14e-06	0.474118	0.0959285	93499	Distal non-eGene
ENSG00000181894	ZNF329	chr19	58126253	58155110	rs281075:58655106:A:G	58143739	58143739	0	1.54e-09	0.503396	0.0814071	-117813	Distal non-eGene
ENSG00000243234	CTD-2583A14.1	chr19	57953159	57953759	rs157362:58675894:C:G	58164527	58164527	0	1.23e-05	-0.112218	0.0253495	-138601	Distal non-eGene
ENSG00000269473	CTD-2619J13.19	chr19	58440449	58445849	19:58695854:G:GT	58184487	58184487	2	9.46e-05	-0.83431	0.211542	44427	Distal non-eGene
ENSG00000278129	ZNF8	chr19	58278952	58302805	rs10695409:58697902:C:CAAAA	58186535	58186535	1	2.11e-05	-0.307497	0.0714407	-212001	Distal non-eGene
ENSG00000131849	ZNF132	chr19	58432815	58440222	rs7259841:58951123:T:C	58439756	58439756	0	4.9e-29	-1.03078	0.0850213	-38252	Distal non-eGene
ENSG00000150873	C2orf50	chr2	11133054	11146790	rs12617097:11277441:A:G	11137315	11137315	0	3.13e-09	0.486591	0.0802865	328862	Distal non-eGene
ENSG00000134324	LPIN1	chr2	11677596	11827409	rs3795974	11784824	11784824	0	3.89e-85	1.11536	0.0440693	-107229	Distal eGene
ENSG00000225649	AC064875.2	chr2	12966785	13007013	rs13427697:13147154:T:C	13007029	13007029	0	3.32e-10	-0.498256	0.0773058	-1329434	Distal non-eGene
ENSG00000118960	HS1BP3	chr2	20560449	20651089	rs4666317:20815185:C:T	20615425	20615425	0	7.76e-09	0.409238	0.069368	-168351	Distal non-eGene
ENSG00000163026	WDCP	chr2	24029341	24049575	rs76734867:24634968:T:A	24412099	24412099	0	3.79e-08	-1.08899	0.19413	381037	Distal non-eGene
ENSG00000084676	NCOA1	chr2	24491915	24770702	rs1135342:24714831:G:T	24491962	24491962	0	1.33e-08	-5.61579	0.967872	301174	Distal non-eGene
ENSG00000224165	DNAJC27-AS1	chr2	24971391	25039694	rs10598706:25196330:TTTTTTG:T	24973461	24973467	1	3.18e-06	-0.354649	0.0750493	68669	Distal non-eGene
ENSG00000115137	DNAJC27	chr2	24943637	24972094	rs13007284:25345685:C:A	25122816	25122816	1	1.56e-05	-0.407914	0.0932555	-151426	Distal non-eGene
ENSG00000138030	KHK	chr2	27086748	27100772	rs11126836	27050260	27050260	0	4.24e-20	-0.47579	0.0490878	-7896	Distal non-eGene
ENSG00000084693	AGBL5	chr2	27042365	27070622	2:27923018:A:AAAT	27700151	27700151	0	5.82e-05	0.866675	0.213291	692297	Distal non-eGene
ENSG00000163811	WDR43	chr2	28894644	28948222	rs12472404:29179452:G:C	28956586	28956586	0	1.07e-15	2.1149	0.253068	141119	Distal non-eGene
ENSG00000189350	FAM179A	chr2	28956612	29061373	rs35065755:29179936:C:CT	28957070	28957070	0	1.38e-24	0.813289	0.0742788	140635	Distal non-eGene
ENSG00000115828	QPCT	chr2	37344575	37373322	rs11675003:37627268:A:G	37400125	37400125	1	8.24e-10	-1.28181	0.203734	476149	Distal non-eGene
ENSG00000119787	ATL2	chr2	38294881	38377285	rs5830529:38544944:T:TA	38317802	38317802	0	1.53e-27	-3.95806	0.337266	197938	Distal non-eGene
ENSG00000115875	SRSF7	chr2	38743600	38751494	rs112011213:38967847:G:A	38740705	38740705	0	4.07e-24	31.3046	2.89283	-363420	Distal non-eGene
ENSG00000115904	SOS1	chr2	38981397	39124345	rs58753292:39289139:T:TA	39061998	39061998	0	8.63e-06	-2.40198	0.532916	167590	Distal non-eGene
ENSG00000162878	PKDCC	chr2	42048021	42058528	rs4952398:42288769:T:G	42061629	42061629	0	2.86e-10	-12.1005	1.87021	-204257	Distal non-eGene
ENSG00000116016	EPAS1	chr2	46293668	46386703	rs2711302:46220888:A:G	45993749	45993749	0	1.37e-06	19.8654	4.05085	435441	Distal non-eGene
ENSG00000279254	RP11-536C12.1	chr2	46668871	46670778	rs4618102:46878928:T:C	46651789	46651789	1	7.93e-15	-0.552962	0.0684716	-1000444	Distal non-eGene
ENSG00000234690	AC073283.4	chr2	47192406	47345074	rs6727575:47566917:T:G	47339778	47339778	0	5.29e-07	-0.212617	0.0417017	355752	Distal non-eGene
ENSG00000162994	CLHC1	chr2	55174792	55232563	rs10197309:55411858:G:T	55184722	55184722	1	1.19e-12	0.496999	0.0676976	-72101	Distal non-eGene
ENSG00000240401	AC012358.8	chr2	55282351	55346049	rs150570652:55961277:G:A	55734142	55734142	0	5.82e-08	0.630094	0.113964	218016	Distal non-eGene
ENSG00000233251	AC007743.1	chr2	56173535	56185770	rs34460791:56408985:CT:C	56181850	56181851	0	2.96e-06	0.180468	0.0380642	568450	Distal non-eGene
ENSG00000173209	AHSA2	chr2	61177419	61191203	rs2600667:61404931:A:T	61177796	61177796	0	9.84e-37	-0.939949	0.0669131	360830	Distal non-eGene
ENSG00000115902	SLC1A4	chr2	64988478	65023865	rs113756095:64684769:C:A	64457635	64457635	1	1.96e-05	1.0576	0.24476	-109894	Distal non-eGene
ENSG00000221823	PPP3R1	chr2	68178858	68256237	rs12994570	68186216	68186216	0	4.92e-17	0.668732	0.0761985	75014	Distal non-eGene
ENSG00000152672	CLEC4F	chr2	70808644	70820600	rs66468957:71114291:T:C	70887161	70887161	0	2.59e-47	-12.586	0.759962	48721	Distal non-eGene
ENSG00000231386	AC007395.4	chr2	70810799	70811474	rs66468957:71114291:T:C	70887161	70887161	0	1.47e-11	-0.870211	0.125178	48721	Distal non-eGene
ENSG00000116031	CD207	chr2	70830215	70835822	rs66468957:71114291:T:C	70887161	70887161	0	1.95e-36	-1.51855	0.108661	48721	Distal non-eGene
ENSG00000144031	ANKRD53	chr2	70978381	70985499	rs60499273:71204588:T:TAGACCACGGTCCGCC	70977458	70977458	0	2.2e-07	-0.424058	0.0804211	-89587	Distal non-eGene
ENSG00000124357	NAGK	chr2	71064345	71079805	rs2287331:71294552:A:G	71067422	71067422	1	2.77e-07	-0.409709	0.0783693	-72912	Distal non-eGene
ENSG00000163170	BOLA3	chr2	74135399	74147994	rs828888:74372678:A:C	74145551	74145551	0	1.19e-19	1.09885	0.114918	-316635	Distal non-eGene
ENSG00000115486	GGCX	chr2	85544724	85561547	rs10700825:85773654:C:CTG	85546531	85546531	0	1.73e-64	4.86982	0.237328	-127810	Distal non-eGene
ENSG00000115525	ST3GAL5	chr2	85839145	85889014	rs35448325:86063614:GA:G	85836491	85836492	0	1.17e-06	4.03413	0.817222	269664	Distal non-eGene
ENSG00000132313	MRPL35	chr2	86199356	86213794	rs2367205:86447376:C:G	86220253	86220253	1	4.06e-09	-0.860291	0.143027	143883	Distal non-eGene
ENSG00000144115	THNSL2	chr2	88170296	88186636	rs10198979:88469104:A:T	88169585	88169585	3	1.21e-09	-0.491491	0.0789393	-113856	Distal non-eGene
ENSG00000135956	TMEM127	chr2	96248517	96265994	2:97075538:TCTC:T	96409800	96409803	0	1.81e-08	2.41464	0.420246	126943	Distal non-eGene
ENSG00000071073	MGAT4A	chr2	98619107	98731126	rs9308813:99263380:G:C	98646917	98646917	0	1.53e-22	2.2164	0.213377	289342	Distal non-eGene
ENSG00000272902	RP11-299H21.1	chr2	101151661	101155412	rs7603503:101819666:A:G	101203204	101203204	0	1.11e-05	0.171239	0.0384689	-201489	Distal non-eGene
ENSG00000088205	DDX18	chr2	117814651	117832379	rs11689073:118573396:A:G	117815820	117815820	0	1.89e-09	2.1247	0.345572	198313	Distal non-eGene
ENSG00000187123	LYPD6	chr2	149329986	149474148	rs111975562:150413745:A:C	149557231	149557231	0	4.59e-08	1.60158	0.287351	-681981	Distal non-eGene
ENSG00000204334	ERICH2	chr2	170783787	170798971	rs2356236:171671684:A:G	170815174	170815174	0	7.59e-07	0.158245	0.0314904	-637029	Distal non-eGene
ENSG00000138434	SSFA2	chr2	181891834	181930738	rs62178847:181973555:G:A	181108828	181108828	0	3.29e-05	0.756538	0.180138	348374	Distal non-eGene
ENSG00000118260	CREB1	chr2	207529738	207603431	rs141006395:208491129:C:CTTTTGTTTTTGT	207626405	207626405	0	5.99e-05	-1.47188	0.36285	399155	Distal non-eGene
ENSG00000163249	CCNYL1	chr2	207711541	207761839	rs17639938:208617482:G:C	207752758	207752758	0	8.63e-06	-0.694213	0.154021	279195	Distal non-eGene
ENSG00000144451	SPAG16	chr2	213284380	214410501	rs7571296:214115522:G:T	213250798	213250798	0	6.32e-06	-0.708595	0.154842	2592924	Distal non-eGene
ENSG00000171450	CDK5R2	chr2	218959656	218962162	exm265186	218394133	218394133	0	4.22e-07	8.45072	1.64281	-123741	Distal non-eGene
ENSG00000135912	TTLL4	chr2	218710846	218755416	rs3770211:219269729:G:T	218405006	218405006	0	8.94e-08	3.1564	0.579453	254649	Distal non-eGene
ENSG00000135925	WNT10A	chr2	218880364	218899581	rs3840475:219743789:TC:T	218879067	218879068	0	7.43e-08	-0.406806	0.0742014	1296	Promoter eGene
ENSG00000066248	NGEF	chr2	232878687	233013272	rs11399343:233580530:C:CT	232715820	232715820	0	3.57e-05	0.191809	0.0458773	494231	Distal non-eGene
ENSG00000132321	IQCA1	chr2	236324148	236507542	rs77005664:237414795:T:G	236506152	236506152	0	1.81e-05	0.945469	0.217875	579665	Distal non-eGene
ENSG00000227252	AC105760.2	chr2	237059435	237085817	rs144908822:237992757:T:G	237084114	237084114	0	4.52e-05	0.245578	0.0595448	-576572	Distal non-eGene
ENSG00000125875	TBC1D20	chr20	435481	462553	rs157795:439105:G:A	458461	458461	0	3.1e-11	1.66818	0.24414	-95626	Distal non-eGene
ENSG00000088833	NSFL1C	chr20	1442163	1473842	rs6131506:1420757:C:T	1440112	1440112	0	4.61e-19	-2.65312	0.282571	-173796	Distal non-eGene
ENSG00000101307	SIRPB1	chr20	1563522	1620061	rs6075340	1913689	1913689	0	2.26e-95	1.39504	0.0502644	-19522	Distal non-eGene
ENSG00000198053	SIRPA	chr20	1894168	1940592	rs66600581:1895601:C:T	1914955	1914955	0	2.75e-16	-0.578859	0.067756	-20788	Distal eGene
ENSG00000198053	SIRPA	chr20	1894168	1940592	rs6136492:1923972:C:T	1943326	1943326	1	5.56e-07	0.411525	0.0808759	-49159	Distal eGene
ENSG00000132622	HSPA12B	chr20	3732668	3753111	rs77552846:3164219:A:G	3183573	3183573	0	4.05e-09	0.476516	0.0792161	-23377	Distal non-eGene
ENSG00000088899	RP5-1187M17.10	chr20	3162618	3173592	rs6051625:3165965:G:A	3185319	3185319	0	5.11e-08	-7.24782	1.3051	-25123	Distal non-eGene
ENSG00000125877	ITPA	chr20	3208869	3223870	rs76873037:3200709:C:A	3220063	3220063	0	5.89e-15	-0.563189	0.0693769	187562	Distal non-eGene
ENSG00000125877	ITPA	chr20	3208869	3223870	rs79609705:3570449:A:G	3589802	3589802	1	9.27e-06	1.35492	0.301674	-118762	Distal non-eGene
ENSG00000101265	RASSF2	chr20	4780024	4823645	rs3746674:4764629:G:A	4783983	4783983	0	7.56e-10	63.6697	10.0965	39662	Distal eGene
ENSG00000089057	SLC23A2	chr20	4852357	5010293	rs6053018:4971886:G:C	4991240	4991240	0	1.8e-09	23.1065	3.75271	121863	Distal non-eGene
ENSG00000089063	TMEM230	chr20	5068233	5113103	rs56198592:5075059:A:T	5094413	5094413	0	3.84e-11	4.08513	0.600867	-84120	Distal non-eGene
ENSG00000101290	CDS2	chr20	5126787	5197887	rs6038087:5169877:A:G	5189231	5189231	0	2.08e-23	0.683376	0.0643034	-62445	Distal eGene
ENSG00000205181	LINC00654	chr20	5496068	5504613	rs4815830:5504777:C:T	5524131	5524131	1	3.23e-06	-0.338928	0.0717758	226262	Distal non-eGene
ENSG00000088766	CRLS1	chr20	6006091	6040053	rs6117042:6016236:A:G	6035590	6035590	1	4.83e-06	0.704319	0.151954	-502712	Distal non-eGene
ENSG00000101290	CDS2	chr20	5126787	5197887	20:6028084:A:T	6047438	6047438	1	2.46e-05	0.697991	0.163528	-513810	Distal non-eGene
ENSG00000125827	TMX4	chr20	7977349	8019829	exm1524618	7982394	7982394	1	2.23e-07	0.840623	0.159495	94857	Distal non-eGene
ENSG00000125827	TMX4	chr20	7977349	8019829	rs11474503:8043187:T:TA	8062540	8062540	0	1.5e-14	0.628337	0.0786876	14711	Distal non-eGene
ENSG00000125869	LAMP5	chr20	9514359	9530524	rs6056717:9563149:C:T	9582502	9582502	0	4.52e-09	-3.77138	0.628987	-513739	Distal non-eGene
ENSG00000132623	ANKEF1	chr20	9986127	10058303	rs6087124:10039451:A:G	10058803	10058803	0	1.04e-14	0.741942	0.0923193	309973	Distal non-eGene
ENSG00000132639	SNAP25	chr20	10218831	10307418	rs2184146:10205305:A:G	10224657	10224657	0	8.26e-06	43.6593	9.66543	144119	Distal non-eGene
ENSG00000101384	JAG1	chr20	10637685	10674107	rs2423508:10617156:T:G	10636508	10636508	0	2.61e-10	-5.46236	0.84231	37599	Distal eGene
ENSG00000149346	SLX4IP	chr20	10435304	10636829	rs7828	10638366	10638366	0	5.73e-12	1.35332	0.190619	35741	Distal non-eGene
ENSG00000089177	KIF16B	chr20	16272105	16573434	rs12481403:16550951:A:G	16570306	16570306	1	5.86e-08	0.505695	0.091487	159655	Distal non-eGene
ENSG00000089177	KIF16B	chr20	16272105	16573434	rs11087176:16553107:TC:T	16572462	16572463	0	1.27e-17	0.573763	0.0640573	157499	Distal non-eGene
ENSG00000125871	MGME1	chr20	17968914	17991122	rs8121408	17972928	17972928	0	1.52e-09	-0.646919	0.104567	-290633	Distal non-eGene
ENSG00000089006	SNX5	chr20	17941598	17968980	rs6105855:17973893:A:G	17993250	17993250	0	2.66e-06	-1.2924	0.271286	-424030	Distal non-eGene
ENSG00000089050	RBBP9	chr20	18486541	18497243	rs3748449:18470646:A:C	18490002	18490002	0	6.56e-19	1.16069	0.124221	-22721	Distal non-eGene
ENSG00000101310	SEC23B	chr20	18507494	18561415	rs1969716:18617108:T:A	18636464	18636464	0	1.34e-35	-10.8134	0.785251	576182	Distal non-eGene
ENSG00000089101	CFAP61	chr20	20052515	20360702	rs6075607:20033755:C:T	20053111	20053111	0	1.78e-12	-0.471463	0.0647605	-35995	Distal non-eGene
ENSG00000088930	XRN2	chr20	21303305	21389827	rs73128919:21237133:A:G	21256495	21256495	0	3.25e-05	1.579	0.375694	232130	Distal non-eGene
ENSG00000132661	NXT1	chr20	23350737	23354777	rs6114064:23335749:T:C	23355112	23355112	0	7.98e-14	-1.1292	0.145829	66407	Distal non-eGene
ENSG00000125814	NAPB	chr20	23374520	23421519	rs1003417:23348007:T:A	23367370	23367370	0	1.19e-68	-1.02496	0.0477276	54149	Distal eGene
ENSG00000125814	NAPB	chr20	23374520	23421519	rs11471498:23431934:T:TGGC	23451297	23451297	1	3.57e-09	-0.612385	0.101431	154579	Distal non-eGene
ENSG00000260903	XKR7	chr20	31968003	32003387	rs6142567:30427067:C:T	31839264	31839264	0	6.53e-05	2.48036	0.614657	212924	Distal non-eGene
ENSG00000197183	NOL4L	chr20	32443060	32585074	rs142664447:30916415:C:CA	32328612	32328612	0	5.25e-09	-8.09168	1.35557	-50948	Distal non-eGene
ENSG00000101417	PXMP4	chr20	33702755	33720319	20:31977317:G:A	33389511	33389511	0	1.76e-06	-1.31435	0.270932	100564	Distal non-eGene
ENSG00000125967	NECAB3	chr20	33657088	33674463	rs34434208:32006063:CT:C	33418257	33418258	0	2.47e-06	0.605341	0.126659	71818	Distal non-eGene
ENSG00000078699	CBFA2T2	chr20	33490076	33650036	rs34434947:32042420:CA:C	33454614	33454615	0	7.01e-13	0.508363	0.068502	35461	Distal eGene
ENSG00000131067	GGT7	chr20	34844721	34872860	rs36024514:33357648:TGAC:T	34769845	34769848	0	1.97e-07	-0.378127	0.0714195	-458043	Distal non-eGene
ENSG00000198646	NCOA6	chr20	34689098	34825649	rs57979275:33384627:T:TA	34796824	34796824	0	3.36e-20	0.783782	0.0806176	-433589	Distal non-eGene
ENSG00000100983	GSS	chr20	34928431	34955817	rs2064453:33460810:T:C	34873007	34873007	0	5.05e-07	0.831959	0.162881	82810	Distal eGene
ENSG00000100991	TRPC4AP	chr20	35002405	35092871	rs1885115:33681256:G:A	35093453	35093453	0	2.36e-07	-1.87341	0.356247	-221307	Distal non-eGene
ENSG00000088298	EDEM2	chr20	35115358	35147364	rs2050652:33733180:G:A	35145377	35145377	0	1.14e-19	1.31555	0.137503	-272517	Distal non-eGene
ENSG00000149639	SOGA1	chr20	36777443	36863686	rs6101995:35362139:C:T	36733736	36733736	0	1.85e-06	2.87649	0.594206	12342	Distal non-eGene
ENSG00000118705	RPN2	chr20	37178411	37241623	rs6073782:35871134:A:C	37242731	37242731	0	7.87e-06	4.6541	1.0279	285200	Distal non-eGene
ENSG00000101452	DHX35	chr20	38962300	39039723	rs377745902:37268734:C:G	38640091	38640091	1	2.39e-06	-0.863896	0.180488	108351	Distal non-eGene
ENSG00000101442	ACTR5	chr20	38748443	38772520	rs76992151:37285358:G:T	38656715	38656715	0	2.75e-05	-1.31009	0.30881	67747	Distal non-eGene
ENSG00000196090	PTPRT	chr20	42072753	43189970	rs6030739:41890453:C:T	43261813	43261813	0	3.31e-14	-5.46683	0.694547	-71843	Distal eGene
ENSG00000132823	OSER1	chr20	44196497	44210791	rs17755091:42816319:A:G	44187679	44187679	0	4.13e-10	1.82267	0.284421	-101	Promoter non-eGene
ENSG00000223891	OSER1-AS1	chr20	44210961	44226027	rs41280254:42852509:C:T	44223869	44223869	0	2.35e-05	1.06235	0.248297	87300	Distal non-eGene
ENSG00000124194	GDAP1L1	chr20	44247100	44280917	rs6017317	44318326	44318326	0	1.87e-15	0.884406	0.106824	-107366	Distal non-eGene
ENSG00000124145	SDC4	chr20	45325289	45348424	rs2267868:43969840:C:T	45341200	45341200	0	2.25e-17	0.701434	0.078985	107125	Distal non-eGene
ENSG00000124145	SDC4	chr20	45325289	45348424	rs2251358:43972682:G:C	45344042	45344042	1	2.72e-05	0.445388	0.104928	104283	Distal non-eGene
ENSG00000124155	PIGT	chr20	45416078	45426244	rs11469243:43988640:GGTA:G	45360000	45360003	0	1.51e-11	-1.56611	0.225412	56077	Distal eGene
ENSG00000269549	RP3-461P17.10	chr20	45445432	45448580	rs113868999:44062993:G:GT	45434353	45434353	2	6.55e-05	-0.468161	0.116032	-127502	Distal non-eGene
ENSG00000269549	RP3-461P17.10	chr20	45445432	45448580	rs16990165:44076549:C:T	45447909	45447909	0	4.5e-05	0.390121	0.0945642	-141058	Distal non-eGene
ENSG00000100982	PCIF1	chr20	45934629	45948023	rs11696603:44182783:A:G	45554144	45554144	0	7.84e-06	3.00683	0.663947	237788	Distal non-eGene
ENSG00000149634	SPATA25	chr20	45886490	45887635	rs6124746:44447876:T:C	45819237	45819237	0	2.16e-06	0.112556	0.0234097	115391	Distal non-eGene
ENSG00000132801	ZSWIM3	chr20	45857618	45879122	rs760558:44485062:T:C	45856423	45856423	0	1.9e-05	-0.31872	0.0736285	24804	Distal non-eGene
ENSG00000064601	CTSA	chr20	45890145	45898820	rs2868359	45856680	45856680	0	6.08e-14	3.60658	0.463385	24547	Distal non-eGene
ENSG00000124104	SNX21	chr20	45833811	45843275	rs4608591	45895143	45895143	0	3.23e-30	2.0356	0.163812	77029	Distal non-eGene
ENSG00000101473	ACOT8	chr20	45841722	45857406	rs11905235:44580788:G:T	45952149	45952149	1	1.59e-05	-0.899335	0.205809	-70922	Distal non-eGene
ENSG00000198026	ZNF335	chr20	45948654	45972172	rs3092073:44595649:G:A	45967010	45967010	0	7.24e-06	-0.529414	0.116447	-175073	Distal non-eGene
ENSG00000204044	RP11-465L10.10	chr20	46013501	46022073	rs3918251:44638781:A:G	46010142	46010142	0	2.27e-07	-0.114629	0.0217649	79810	Distal non-eGene
ENSG00000172315	TP53RK	chr20	46684366	46689779	rs4810495:44941463:A:G	46312824	46312824	0	3.84e-05	0.523735	0.125793	-194552	Distal non-eGene
ENSG00000080189	SLC35C2	chr20	46345981	46364458	rs13040414:44982335:A:G	46353696	46353696	0	3.87e-06	-3.39416	0.724735	-235424	Distal non-eGene
ENSG00000215452	ZNF663P	chr20	46414229	46459276	rs2780229:45133767:C:T	46505128	46505128	0	1.29e-11	0.587404	0.0842415	179339	Distal non-eGene
ENSG00000198185	ZNF334	chr20	46499631	46513559	rs202370:45158450:G:C	46529811	46529811	0	3.03e-09	2.09972	0.346129	154656	Distal non-eGene
ENSG00000215452	ZNF663P	chr20	46414229	46459276	rs6512382:45159602:T:C	46530963	46530963	2	1.11e-07	-0.41627	0.0770022	153504	Distal non-eGene
ENSG00000149654	CDH22	chr20	46173734	46308498	rs41303819:45313634:C:A	46684995	46684995	0	4.88e-06	1.62283	0.350273	-171436	Distal non-eGene
ENSG00000196396	PTPN1	chr20	50510322	50585241	rs3091975:48235673:G:A	49619136	49619136	0	4.12e-06	-0.707757	0.151568	193577	Distal non-eGene
ENSG00000277449	CEBPB-AS1	chr20	50184599	50191498	rs35438146:48801824:A:AT	50185287	50185287	0	1.9e-05	0.316136	0.0730463	325034	Distal non-eGene
ENSG00000101096	NFATC2	chr20	51386958	51562831	20:50251566:A:ACCCCCC	51635027	51635027	0	4.33e-06	-0.184981	0.0397045	569281	Distal non-eGene
ENSG00000124253	PCK1	chr20	57561081	57568112	rs73182744:56158848:G:A	57583792	57583792	0	2.54e-11	5.38467	0.784343	644861	Distal non-eGene
ENSG00000101166	PRELID3B	chr20	59033146	59042909	rs11474519:57611129:T:TGGGGGAGAC	59036074	59036074	0	6.18e-07	-0.548557	0.108258	-54866	Distal non-eGene
ENSG00000130699	TAF4	chr20	61953470	62065810	rs6089608:60591084:T:C	62016028	62016028	0	4.62e-07	0.799523	0.155985	127767	Distal non-eGene
ENSG00000283078	RP11-11M20.4	chr20	62066831	62068437	rs73152429:60605117:C:T	62030061	62030061	0	5.62e-07	0.824047	0.162017	92400	Distal non-eGene
ENSG00000149657	LSM14B	chr20	62122462	62135378	rs35313578:60711298:A:AGAG	62136242	62136242	0	1.14e-09	1.64408	0.263627	-70432	Distal non-eGene
ENSG00000101181	MTG2	chr20	62183030	62203568	rs1760049:60780450:T:C	62205394	62205394	0	6.1e-28	-1.5062	0.127213	26528	Distal non-eGene
ENSG00000101189	MRGBP	chr20	62796454	62801738	rs7396:61431503:T:C	62800151	62800151	0	1.03e-06	-0.578732	0.116606	-157706	Distal non-eGene
ENSG00000101191	DIDO1	chr20	62877739	62937952	rs62200157:61553461:T:C	62922109	62922109	0	1.28e-11	-4.02134	0.576674	15843	Distal eGene
ENSG00000225978	HAR1A	chr20	63102206	63104386	rs1535154:61769065:A:C	63137713	63137713	1	6.14e-13	0.511731	0.0687715	-128330	Distal non-eGene
ENSG00000101197	BIRC7	chr20	63235884	63240507	rs68041888:61851699:G:A	63220347	63220347	0	5.56e-14	0.393313	0.0504499	-210964	Distal non-eGene
ENSG00000275620	FLJ16779	chr20	63253979	63261615	rs113658090:61852875:T:C	63221523	63221523	1	7.01e-06	0.407385	0.089468	-212140	Distal non-eGene
ENSG00000229299	RP4-583P15.10	chr20	63744690	63745958	rs150556970:62577502:G:A	63946149	63946149	1	6.92e-06	-1.50141	0.329532	-50967	Distal non-eGene
ENSG00000198276	UCKL1	chr20	63939830	63956415	rs817310:62580642:C:G	63949289	63949289	0	7.17e-06	2.92602	0.643302	-54107	Distal non-eGene
ENSG00000196421	LINC00176	chr20	64034345	64039962	rs6011265:62674787:A:T	64043434	64043434	0	1.94e-05	0.266406	0.0616233	-495930	Distal non-eGene
ENSG00000171703	TCEA2	chr20	64049837	64072347	rs6011280	64073787	64073787	0	7.82e-09	0.72558	0.123021	-536417	Distal non-eGene
ENSG00000125510	OPRL1	chr20	64080174	64100643	rs4408777	64074752	64074752	0	5.01e-06	0.129432	0.0279711	-537382	Distal non-eGene
ENSG00000156239	N6AMT1	chr21	28872192	28885371	rs11701759:30115571:C:T	28743249	28743249	0	7.85e-20	-3.23026	0.33596	-1897840	Distal non-eGene
ENSG00000241837	ATP5O	chr21	33903454	33915980	rs11340038:35290745:CT:C	33918441	33918442	0	1.15e-16	0.583408	0.0673495	155151	Distal non-eGene
ENSG00000241837	ATP5O	chr21	33903454	33915980	rs12482569:35293087:G:A	33920783	33920783	1	5.34e-05	0.359291	0.0879692	152809	Distal non-eGene
ENSG00000142197	DOPEY2	chr21	36156783	36294274	rs9977612:37511338:C:T	36139040	36139040	0	1.08e-16	0.772116	0.0890569	181149	Distal non-eGene
ENSG00000182093	WRB	chr21	39380245	39428528	rs2837006:40772436:T:C	39400510	39400510	0	3.85e-43	19.5957	1.25756	-78951	Distal non-eGene
ENSG00000185437	SH3BGR	chr21	39445856	39515506	rs79309546:40896442:T:C	39524515	39524515	3	1.31e-06	-0.676092	0.137639	105756	Distal non-eGene
ENSG00000183778	B3GALT5	chr21	39556443	39673137	rs1571714:40905550:T:C	39533623	39533623	1	1.2e-10	0.469616	0.0710036	96648	Distal non-eGene
ENSG00000183067	IGSF5	chr21	39745408	39802096	rs460604:41174799:C:G	39802872	39802872	0	3.41e-17	-0.205752	0.0233138	1044267	Distal non-eGene
ENSG00000141956	PRDM15	chr21	41798226	41879482	rs28570097:43239106:T:C	41818750	41818750	0	1.36e-07	0.530427	0.0988351	244209	Distal non-eGene
ENSG00000276529	AP001505.10	chr21	44978833	44979274	rs73371038:46714857:C:T	45294942	45294942	0	2.81e-05	0.625335	0.147585	-221089	Distal non-eGene
ENSG00000280604	PCBP3-OT1	chr21	45914297	45919483	rs74459266:47236206:C:T	45816292	45816292	0	2.57e-07	-0.417561	0.0796548	-222638	Distal non-eGene
ENSG00000177663	IL17RA	chr22	17084955	17115694	rs2845391:17526688:A:T	17045798	17045798	0	1.81e-51	1.8476	0.105418	-123625	Distal non-eGene
ENSG00000237438	CECR7	chr22	17036571	17060825	rs1054945:17539544:G:A	17058654	17058654	0	1.12e-56	1.61604	0.0862954	-143673	Distal non-eGene
ENSG00000069998	CECR5	chr22	17137512	17165287	rs201987429:17641550:A:T	17160660	17160660	0	2.07e-06	-1.99196	0.413494	199289	Distal non-eGene
ENSG00000093072	CECR1	chr22	17178791	17221989	rs17807317	17199629	17199629	0	1.36e-130	16.2928	0.442855	160320	Distal non-eGene
ENSG00000241832	CECR3	chr22	17256860	17266733	rs4819987:17743563:T:C	17262673	17262673	0	3.58e-14	0.809308	0.102966	-40684	Distal non-eGene
ENSG00000099954	CECR2	chr22	17359950	17558149	rs5992672:17850784:T:A	17370843	17370843	0	1.09e-07	-6.16461	1.13951	-104110	Distal non-eGene
ENSG00000182902	SLC25A18	chr22	17563440	17590994	rs1296807:18046289:A:G	17566578	17566578	0	6.48e-14	0.582641	0.0749485	62277	Distal non-eGene
ENSG00000215193	PEX26	chr22	18077921	18131138	rs362262:18565048:T:C	18082282	18082282	0	2.2e-06	-1.02069	0.212456	-57723	Distal non-eGene
ENSG00000283406	DGCR5	chr22	18970526	19031242	rs1210641:18984848:A:G	18997335	18997335	1	2.41e-07	0.382314	0.0727484	125119	Distal non-eGene
ENSG00000100075	SLC25A1	chr22	19175576	19178830	rs807669	19167009	19167009	0	5.67e-20	-0.747188	0.0773796	-16726	Distal non-eGene
ENSG00000242259	C22orf39	chr22	19351369	19448232	rs712963:19156543:A:G	19169030	19169030	0	3.25e-05	1.20901	0.287641	-18747	Distal non-eGene
ENSG00000185608	MRPL40	chr22	19431903	19436075	rs9606017:19421229:G:A	19433706	19433706	1	1.32e-05	0.30374	0.0688363	-262311	Distal non-eGene
ENSG00000185065	AC000068.5	chr22	19447894	19450105	rs149217901:19435962:CAG:C	19448439	19448441	0	3.23e-24	-0.663653	0.0611735	-298156	Distal non-eGene
ENSG00000184470	TXNRD2	chr22	19875518	19941992	exm1585856	19919576	19919576	0	8.6e-08	0.456802	0.0837448	-205112	Distal non-eGene
ENSG00000183773	AIFM3	chr22	20965109	20981360	rs105034:21334924:G:C	20980635	20980635	0	1.27e-06	-0.582766	0.118484	-1173	Promoter non-eGene
ENSG00000099949	LZTR1	chr22	20979463	20999038	rs16446:21353088:G:GGCCAGGTGC	20998799	20998799	0	4.62e-10	-0.43822	0.0685836	-33691	Distal non-eGene
ENSG00000187905	LRRC74B	chr22	21045961	21064168	rs73164873:21405546:C:T	21051257	21051257	0	1.36e-40	1.41436	0.0944335	-19900	Distal non-eGene
ENSG00000224086	LL22NC03-86G7.1	chr22	21938294	21977632	rs5844475:22283231:G:GC	21928859	21928859	0	7.44e-73	-1.45037	0.0646202	-193025	Distal non-eGene
ENSG00000100034	PPM1F	chr22	21919421	21952837	rs240066:22292995:C:A	21938623	21938623	0	1.2e-11	-0.674705	0.0966009	-202789	Distal non-eGene
ENSG00000100038	TOP3B	chr22	21957026	21982816	rs34899223:22304760:GT:G	21950388	21950389	0	2.32e-10	-1.09634	0.168547	-284379	Distal non-eGene
ENSG00000272733	KB-208E9.1	chr22	23580881	23583859	rs6003823	23649233	23649233	0	1.04e-42	-0.479312	0.0309626	-16912	Distal non-eGene
ENSG00000099991	CABIN1	chr22	24011193	24178628	rs2267063:24544607:T:C	24148640	24148640	0	7.87e-06	3.57726	0.790049	-137448	Distal eGene
ENSG00000100024	UPB1	chr22	24494108	24528390	rs131455:24908536:T:C	24512568	24512568	0	1.5e-06	1.55606	0.318534	-241751	Distal non-eGene
ENSG00000100077	GRK3	chr22	25564850	25729294	rs5996945	25479606	25479606	0	9.72e-19	-4.48571	0.482699	262538	Distal non-eGene
ENSG00000261188	CTA-445C9.14	chr22	26512538	26514568	rs62225810:26844955:C:A	26448989	26448989	2	2.26e-06	-0.72049	0.150139	-58213	Distal non-eGene
ENSG00000100109	TFIP11	chr22	26491226	26512505	rs3788401:26896891:C:G	26500925	26500925	0	5.2e-07	-0.898475	0.176108	144411	Distal non-eGene
ENSG00000100099	HPS4	chr22	26443424	26483837	rs2283825:26924535:C:T	26528569	26528569	0	2.35e-23	-0.861054	0.0811357	-16064	Distal non-eGene
ENSG00000244625	MIATNB	chr22	26672768	26780207	rs5761703:27117690:A:G	26721727	26721727	1	9.51e-07	-0.378219	0.075963	1198407	Distal non-eGene
ENSG00000100219	XBP1	chr22	28794556	28800597	rs36010418:29238957:G:GA	28842969	28842969	0	1.23e-09	-3.38335	0.543699	-163104	Distal non-eGene
ENSG00000100276	RASL10A	chr22	29312934	29319679	rs6006090:29705927:A:G	29309937	29309937	0	8.06e-13	0.505369	0.0682923	-41728	Distal non-eGene
ENSG00000182944	EWSR1	chr22	29268010	29300525	rs34639591:30488032:AT:A	30092043	30092044	0	2.01e-05	-5.77265	1.33783	-488487	Distal non-eGene
ENSG00000279699	RP1-102K2.9	chr22	30275216	30276951	rs722298:30777529:G:A	30381540	30381540	0	7.15e-06	-0.18348	0.0403331	-82058	Distal non-eGene
ENSG00000237977	EIF4HP2	chr22	30902220	30902781	rs55694472:31279889:C:T	30883902	30883902	0	5.02e-07	1.01494	0.198653	-190120	Distal non-eGene
ENSG00000237977	EIF4HP2	chr22	30902220	30902781	rs11705565:31287711:G:A	30891724	30891724	1	9.22e-06	-0.329564	0.0733608	-197942	Distal non-eGene
ENSG00000184708	EIF4ENIF1	chr22	31436978	31496108	rs55673702:32035518:G:A	31639532	31639532	0	9.47e-06	1.92789	0.429718	304929	Distal non-eGene
ENSG00000241878	PISD	chr22	31618492	31662432	rs5998197:32361385:A:G	31965398	31965398	1	7.12e-06	-0.670211	0.147295	-211447	Distal non-eGene
ENSG00000205853	RFPL3S	chr22	32359907	32382052	rs150165508:32806442:T:TAAGG	32410455	32410455	0	6.73e-25	-1.35976	0.123242	64221	Distal non-eGene
ENSG00000100350	FOXRED2	chr22	36487191	36507101	rs8135600:36868949:A:G	36472902	36472902	1	1.06e-05	0.489635	0.109772	-84884	Distal non-eGene
ENSG00000278195	SSTR3	chr22	37204239	37212322	rs5750348:37370921:T:C	36974880	36974880	0	4.14e-05	-0.11317	0.0272982	-271322	Distal non-eGene
ENSG00000100316	RPL3	chr22	39312883	39320389	rs10676026:39712245:T:TAA	39316240	39316240	0	3.02e-05	32.7041	7.74857	-443926	Distal non-eGene
ENSG00000128272	ATF4	chr22	39519696	39522685	rs710192	39517415	39517415	0	6.78e-25	42.921	3.89043	-17983	Distal non-eGene
ENSG00000100372	SLC25A17	chr22	40769631	40819399	rs4821921:40389638:A:T	39993634	39993634	1	8.84e-05	-0.39582	0.0999324	-422881	Distal non-eGene
ENSG00000196588	MKL1	chr22	40410282	40636702	rs139064:40886557:T:C	40490553	40490553	0	1.23e-15	-0.550889	0.0660799	146149	Distal eGene
ENSG00000100138	SNU13	chr22	41673931	41690504	exm-rs5751086	41372858	41372858	0	8.67e-08	-0.44136	0.0809381	-71336	Distal non-eGene
ENSG00000100413	POLR3H	chr22	41525805	41544606	rs132919:41809903:G:C	41413899	41413899	0	5.93e-13	-1.64565	0.221	130707	Distal eGene
ENSG00000100412	ACO2	chr22	41469126	41528989	rs117369326:41865334:G:A	41469330	41469330	1	5.81e-06	-0.778343	0.16939	-22307	Distal non-eGene
ENSG00000100410	PHF5A	chr22	41459718	41468725	rs79013:41889363:A:T	41493359	41493359	0	4.61e-05	0.555602	0.134858	-126026	Distal non-eGene
ENSG00000159958	TNFRSF13C	chr22	41922024	41926818	rs3752592:42342765:G:T	41946761	41946761	0	9.89e-17	0.327783	0.0377529	-325642	Distal non-eGene
ENSG00000205704	LINC00634	chr22	41952166	41958933	22:42349744:GTTTTTTTTTTTTTT:G	41953740	41953754	0	1.99e-12	-0.230592	0.0317507	-264801	Distal non-eGene
ENSG00000177096	FAM109B	chr22	42074252	42079441	rs6002561:42359204:A:G	41963200	41963200	0	6.88e-09	-0.117983	0.0199261	-274261	Distal non-eGene
ENSG00000100167	SEPTIN3	chr22	41976273	41998221	rs4822072:42360833:G:C	41964829	41964829	0	8.7e-06	2.86611	0.63614	-275890	Distal non-eGene
ENSG00000235513	RP4-756G23.5	chr22	41209123	41217627	rs10154700:42365073:G:T	41969069	41969069	0	6.02e-05	0.118288	0.0291707	-278565	Distal non-eGene
ENSG00000183066	WBP2NL	chr22	41998726	42058456	rs2854827:42461918:G:A	42065914	42065914	0	3.39e-11	-0.508504	0.0745719	-89642	Distal non-eGene
ENSG00000100197	CYP2D6	chr22	42126500	42130906	rs133376:42466905:C:T	42070901	42070901	0	1.73e-49	-1.54368	0.0904465	-94629	Distal non-eGene
ENSG00000128274	A4GALT	chr22	42692122	42721298	rs5759015	42895523	42895523	0	3.67e-10	-0.450375	0.0700637	143062	Distal non-eGene
ENSG00000280434	RP4-671O14.6	chr22	44139366	44153626	rs7285340:44419871:T:C	44023991	44023991	0	1.45e-06	-0.19769	0.0404128	601428	Distal non-eGene
ENSG00000188677	PARVB	chr22	43999212	44172949	rs35928604:44420015:G:C	44024135	44024135	1	2.54e-05	0.339075	0.0795783	601284	Distal non-eGene
ENSG00000138944	KIAA1644	chr22	44243668	44312851	rs7511306	44304707	44304707	0	2.44e-29	-0.944843	0.0774339	-305496	Distal non-eGene
ENSG00000280011	RP4-671O14.7	chr22	44210443	44229512	rs13055353:44702445:A:G	44306565	44306565	1	2.74e-08	0.446613	0.078771	-307354	Distal non-eGene
ENSG00000186951	PPARA	chr22	46150522	46243756	rs78515448:46605012:T:C	46209115	46209115	1	2.68e-07	1.17044	0.22363	-58594	Distal eGene
ENSG00000075234	TTC38	chr22	46267962	46294008	rs7285629:46692203:T:C	46296306	46296306	0	9.11e-08	1.39214	0.255736	-251453	Distal non-eGene
ENSG00000277232	GTSE1-AS1	chr22	46295144	46296660	rs113417347:46711369:G:A	46315472	46315472	0	5.87e-07	-0.383971	0.0756239	-308856	Distal non-eGene
ENSG00000273253	RP3-402G11.26	chr22	50199091	50200837	rs5771096:50638502:T:C	50200073	50200073	0	5.17e-08	-0.254952	0.0459261	-14158	Distal non-eGene
ENSG00000185386	MAPK11	chr22	50263714	50270767	rs4992603:50714749:C:T	50276320	50276320	0	2.07e-05	0.889451	0.206462	50740	Distal non-eGene
ENSG00000188130	MAPK12	chr22	50245451	50261825	rs111925803:50719976:C:T	50281547	50281547	1	2.21e-06	-0.360879	0.0751325	45513	Distal non-eGene
ENSG00000025770	NCAPH2	chr22	50508217	50523472	rs131807:50963540:G:C	50525111	50525111	0	2.71e-05	0.308163	0.0725769	37794	Distal non-eGene
ENSG00000100288	CHKB	chr22	50578950	50601455	rs86337:51020668:C:A	50582239	50582239	0	8.62e-09	1.22766	0.208765	19216	Distal eGene
ENSG00000205560	CPT1B	chr22	50568862	50578465	rs131747:51025074:C:T	50586645	50586645	1	1.41e-06	0.316471	0.0646244	41528	Distal non-eGene
ENSG00000196220	SRGAP3	chr3	8980592	9363053	rs1161765	9006468	9006468	0	1.08e-12	-5.35779	0.728323	356585	Distal eGene
ENSG00000255021	RP11-536I6.2	chr3	14272374	14303845	rs11711684	14281424	14281424	1	8.58e-08	-0.526867	0.0965813	121152	Distal non-eGene
ENSG00000255021	RP11-536I6.2	chr3	14272374	14303845	rs9869724:14330905:A:G	14289405	14289405	0	6.81e-50	0.906773	0.0528378	113171	Distal non-eGene
ENSG00000251576	LINC01267	chr3	14348452	14352568	rs34200660:14411417:C:T	14369917	14369917	1	3.58e-13	-0.809722	0.107651	-66072	Distal non-eGene
ENSG00000225733	FGD5-AS1	chr3	14920348	14948424	3:14485310:C:G	14443802	14443802	1	3.7e-05	0.625906	0.150009	-41226	Distal non-eGene
ENSG00000131379	C3orf20	chr3	14675100	14773034	rs4684237:14710588:C:T	14669081	14669081	0	5.74e-24	-0.30332	0.0281355	149881	Distal non-eGene
ENSG00000154781	CCDC174	chr3	14651747	14672659	rs74611042:14714274:C:CA	14672767	14672767	0	4.66e-23	1.42038	0.134881	146195	Distal non-eGene
ENSG00000206562	METTL6	chr3	15381276	15440566	3:15448073:G:GA	15406566	15406566	0	3.27e-10	-1.0017	0.155365	-200607	Distal non-eGene
ENSG00000170248	PDCD6IP	chr3	33798353	33869707	rs139804155:33819788:C:CCT	33778296	33778296	1	1.41e-05	-0.965164	0.219485	-664317	Distal non-eGene
ENSG00000076242	MLH1	chr3	36993333	37050918	rs11456731:36883393:C:CA	36841902	36841902	0	5.85e-06	0.323958	0.0705258	-77553	Distal non-eGene
ENSG00000198590	C3orf35	chr3	37386270	37435497	rs7610896:37494423:A:G	37452932	37452932	0	1.09e-07	-0.941227	0.173978	-817	Promoter non-eGene
ENSG00000172888	ZNF621	chr3	40524879	40574685	rs61424517:40598085:AT:A	40556594	40556595	0	2.46e-05	-0.987401	0.231308	1405836	Distal non-eGene
ENSG00000114812	VIPR1	chr3	42489300	42537573	rs704966:42472986:G:A	42431494	42431494	1	1.02e-05	0.362511	0.0810893	-165287	Distal non-eGene
ENSG00000114857	NKTR	chr3	42600615	42648741	3:42479486:CAAAAAAAAAAAAAAA:C	42437994	42438009	1	3.32e-06	0.808079	0.171344	-171787	Distal non-eGene
ENSG00000114812	VIPR1	chr3	42489300	42537573	rs11129963:42501389:G:A	42459897	42459897	0	1.72e-12	-0.63893	0.0877059	-193690	Distal non-eGene
ENSG00000011376	LARS2	chr3	45388507	45549421	rs113936742:45561149:C:CT	45519657	45519657	0	5.93e-16	-1.3685	0.162183	35737	Distal non-eGene
ENSG00000173531	MST1	chr3	49683948	49689501	rs114093899:49577388:G:C	49539955	49539955	1	6.3e-06	0.685436	0.149751	14534	Distal non-eGene
ENSG00000004534	RBM6	chr3	49940008	50100045	rs2071206:50160109:G:A	50122676	50122676	0	6.17e-55	28.6256	1.562	32369	Distal non-eGene
ENSG00000164076	CAMKV	chr3	49857989	49870222	rs35451690:50168854:A:ACG	50131421	50131421	0	7.97e-27	1.31715	0.114066	23624	Distal non-eGene
ENSG00000272182	RP11-802O23.3	chr3	58428256	58428815	rs7640259:58221822:C:T	58236095	58236095	0	6.63e-07	-0.118581	0.0234679	70152	Distal non-eGene
ENSG00000168297	PXK	chr3	58332881	58426126	rs4356838:58472425:C:T	58486698	58486698	0	2.11e-15	-0.650887	0.0787828	-156733	Distal non-eGene
ENSG00000168309	FAM107A	chr3	58564118	58627610	rs3792402:58560446:C:T	58574719	58574719	0	4.38e-05	-8.56371	2.07262	32361	Distal non-eGene
ENSG00000224479	AC136289.1	chr3	63741828	63827445	rs2130990:63812600:G:A	63826924	63826924	1	1.06e-09	-0.434691	0.0695667	-598609	Distal non-eGene
ENSG00000224479	AC136289.1	chr3	63741828	63827445	rs73120888:63815326:C:T	63829650	63829650	0	1.68e-06	0.83981	0.172764	-601335	Distal non-eGene
ENSG00000172340	SUCLG2	chr3	67360461	67654614	rs75490487:67429610:A:T	67379186	67379186	1	9.33e-06	0.506541	0.11282	1574111	Distal non-eGene
ENSG00000169855	ROBO1	chr3	78597241	79767815	rs17379690:79024541:T:G	78975391	78975391	0	1.9e-05	1.71022	0.395088	792424	Distal eGene
ENSG00000080200	CRYBG3	chr3	97822041	97944963	rs71113872:97526634:C:CA	97807790	97807790	0	1.04e-19	-0.65617	0.0684968	227514	Distal non-eGene
ENSG00000183185	GABRR3	chr3	97986674	98035304	rs35867090:97748958:GA:G	98030114	98030115	1	6.68e-08	0.40855	0.0742444	-265593	Distal non-eGene
ENSG00000183185	GABRR3	chr3	97986674	98035304	rs1948382:97755400:G:A	98036556	98036556	0	1.63e-37	0.985685	0.0692347	197095	Distal non-eGene
ENSG00000080200	CRYBG3	chr3	97822041	97944963	rs35895287:97757202:G:GAAA	98038358	98038358	1	1.13e-06	-0.352088	0.0712216	195293	Distal non-eGene
ENSG00000057019	DCBLD2	chr3	98795942	98901689	rs13091170:98620300:G:A	98901456	98901456	1	2.31e-06	-0.653862	0.136391	1359544	Distal non-eGene
ENSG00000057019	DCBLD2	chr3	98795942	98901689	rs62276943:98730500:T:C	99011656	99011656	2	4.97e-05	0.723047	0.176281	626819	Distal non-eGene
ENSG00000273374	RP11-383I23.2	chr3	99802700	99806058	rs34514832:99535436:GT:G	99816592	99816593	0	1.22e-06	-0.206999	0.0420096	444408	Distal non-eGene
ENSG00000114021	NIT2	chr3	100334702	100361635	rs277627:100055273:G:A	100336429	100336429	0	3.57e-11	-2.08576	0.306259	64764	Distal non-eGene
ENSG00000154174	TOMM70	chr3	100363432	100401398	rs13082297:100071070:G:C	100352226	100352226	0	3.28e-07	3.58724	0.690648	49172	Distal eGene
ENSG00000206535	LNP1	chr3	100401194	100456319	3:100136903:A:AC	100418059	100418059	0	2.14e-13	-3.76493	0.495485	-83358	Distal non-eGene
ENSG00000144810	COL8A1	chr3	99638476	99799226	rs74895058:100452614:A:G	100733770	100733770	0	7.59e-06	0.969609	0.213765	779471	Distal non-eGene
ENSG00000114354	TFG	chr3	100709332	100748966	rs35152775:100461734:C:CA	100742890	100742890	0	1.17e-09	2.39592	0.384506	770351	Distal non-eGene
ENSG00000138468	SENP7	chr3	101324206	101513241	rs145898511:101181250:T:G	101462406	101462406	1	3.05e-06	1.17082	0.247283	50835	Distal eGene
ENSG00000081154	PCNP	chr3	101574096	101594437	rs3762732:101291984:A:C	101573140	101573140	0	6.5e-05	-3.72262	0.92227	-59899	Distal non-eGene
ENSG00000066422	ZBTB11	chr3	101648890	101677495	rs73159237:101406831:C:T	101687987	101687987	0	4.76e-05	1.12728	0.274156	-126125	Distal non-eGene
ENSG00000138468	SENP7	chr3	101324206	101513241	rs11362086:101407564:CA:C	101688720	101688721	2	2.04e-05	-0.535405	0.124165	-126858	Distal non-eGene
ENSG00000244119	PDCL3P4	chr3	101712473	101713191	rs34301719:101417993:C:T	101699149	101699149	0	7.51e-65	1.04068	0.0505123	400095	Distal non-eGene
ENSG00000144815	NXPE3	chr3	101779203	101827392	rs35150191:101429546:A:AT	101710702	101710702	0	1.5e-09	-2.06679	0.333985	388542	Distal non-eGene
ENSG00000279277	RP11-861A13.3	chr3	108036719	108038445	rs1344876:107737411:C:A	108018564	108018564	1	1.98e-06	0.329912	0.0683616	19881	Distal eGene
ENSG00000196776	CD47	chr3	108043299	108091025	rs1344876:107737411:C:A	108018564	108018564	1	4.61e-09	0.40368	0.0673673	19881	Distal non-eGene
ENSG00000144821	MYH15	chr3	108380370	108529322	rs7612356:107811037:C:G	108092190	108092190	1	1.71e-06	0.3803	0.0783056	437132	Distal eGene
ENSG00000114446	IFT57	chr3	108160813	108222570	rs7639774:107816216:T:G	108097369	108097369	0	4.56e-23	3.67543	0.348934	125201	Distal eGene
ENSG00000279277	RP11-861A13.3	chr3	108036719	108038445	rs17231503	108098452	108098452	0	4.27e-35	-0.914413	0.0670056	124118	Distal non-eGene
ENSG00000196776	CD47	chr3	108043299	108091025	rs17231503	108098452	108098452	0	1.99e-68	-1.18624	0.0553693	124118	Distal non-eGene
ENSG00000144821	MYH15	chr3	108380370	108529322	rs936266:108125614:C:T	108406767	108406767	0	4.09e-15	-0.619601	0.0758437	-523519	Distal non-eGene
ENSG00000138472	GUCA1C	chr3	108907793	108953895	rs114203770:108803516:C:T	109084669	109084669	2	2.91e-05	-0.831015	0.196499	33473	Distal non-eGene
ENSG00000144824	PHLDB2	chr3	111732498	111976517	rs4682298	111728212	111728212	0	1.41e-35	-0.588907	0.0427823	4285	Distal eGene
ENSG00000138459	SLC35A5	chr3	112561710	112585577	rs11483243:112295939:G:GA	112577092	112577092	0	2.2e-06	3.15522	0.656776	442440	Distal non-eGene
ENSG00000091986	CCDC80	chr3	112596795	112649530	rs6794305:112355977:C:T	112637130	112637130	0	7.55e-08	-1.9662	0.358822	337992	Distal non-eGene
ENSG00000163607	GTPBP8	chr3	112990919	113015060	rs57916867:112701126:T:C	112982279	112982279	0	1.28e-07	1.18392	0.220107	-420570	Distal non-eGene
ENSG00000163608	NEPRO	chr3	113002441	113019861	rs3732814	113005489	113005489	1	1.04e-05	0.956406	0.214204	691157	Distal non-eGene
ENSG00000163608	NEPRO	chr3	113002441	113019861	rs2293560:112738318:C:T	113019471	113019471	0	7.63e-11	0.568714	0.0850375	-457425	Distal non-eGene
ENSG00000259976	MIR568	chr3	114314502	114329714	Neandertal_chr3_114088966	114370119	114370119	0	2.4e-05	8.99099	2.10368	777152	Distal non-eGene
ENSG00000176142	TMEM39A	chr3	119429501	119468830	rs6777535:119197016:A:G	119478169	119478169	0	1.66e-05	-0.686196	0.157395	157981	Distal non-eGene
ENSG00000113845	TIMMDC1	chr3	119498533	119525090	rs7610763:119240285:G:A	119521438	119521438	0	2.95e-05	-1.35646	0.320973	143886	Distal non-eGene
ENSG00000183833	MAATS1	chr3	119703023	119767102	rs71619757:119433229:A:AG	119714382	119714382	0	7.63e-14	-4.8278	0.622945	3871160	Distal non-eGene
ENSG00000145087	STXBP5L	chr3	120908073	121424761	rs7619694	120839262	120839262	0	2.64e-24	0.736869	0.0677733	-242953	Distal non-eGene
ENSG00000173226	IQCB1	chr3	121769764	121835079	rs11385480:121506036:T:TA	121787189	121787189	0	1.84e-42	0.911294	0.0590936	47890	Distal eGene
ENSG00000173226	IQCB1	chr3	121769764	121835079	rs76808446:121527107:A:T	121808260	121808260	1	3.7e-15	0.760019	0.092874	26819	Distal eGene
ENSG00000272758	RP11-299J3.8	chr3	122416208	122443180	rs57086078:122104982:T:C	122386135	122386135	0	1.32e-19	1.21599	0.127346	-1959	Promoter non-eGene
ENSG00000160124	CCDC58	chr3	122359592	122383231	rs10511410:122128519:G:C	122409672	122409672	0	2.28e-09	-0.772642	0.126324	6535	Distal non-eGene
ENSG00000196981	WDR5B	chr3	122412333	122416051	rs9289193:122134889:T:A	122416042	122416042	0	3.31e-51	0.927038	0.0530778	-32811	Distal non-eGene
ENSG00000196981	WDR5B	chr3	122412333	122416051	rs7647874:122137196:T:G	122418349	122418349	1	2.16e-08	-0.63736	0.11155	-35118	Distal non-eGene
ENSG00000114023	FAM162A	chr3	122384177	122412334	rs201104568:122207902:TGC:T	122489055	122489057	0	2.99e-05	-3.23146	0.76521	25890	Distal non-eGene
ENSG00000169087	HSPBAP1	chr3	122740004	122793824	rs112201632:122408218:T:C	122689371	122689371	0	3.99e-16	1.68182	0.198032	-305195	Distal non-eGene
ENSG00000138463	DIRC2	chr3	122794796	122881139	rs74503099:122653893:A:G	122935046	122935046	1	8.79e-09	-0.859529	0.146249	342307	Distal non-eGene
ENSG00000121542	SEC22A	chr3	123201928	123274130	rs369549384:122983472:AT:A	123264625	123264626	0	3.6e-07	-0.680778	0.131535	-236020	Distal non-eGene
ENSG00000173175	ADCY5	chr3	123282297	123449758	exm-rs11708067	123346931	123346931	0	9.56e-16	2.3368	0.279115	102827	Distal eGene
ENSG00000160145	KALRN	chr3	124080024	124726325	rs75589696:124213378:T:G	124494531	124494531	1	4.68e-06	-1.1236	0.242052	-414508	Distal eGene
ENSG00000114491	UMPS	chr3	124730367	124749273	rs2055983:124480430:A:G	124761583	124761583	0	1.15e-14	0.711926	0.0887437	139835	Distal non-eGene
ENSG00000082781	ITGB5	chr3	124761949	124901418	rs3836307:124489739:CG:C	124770892	124770893	0	8.42e-06	-2.12164	0.470129	130526	Distal eGene
ENSG00000173706	HEG1	chr3	124965711	125055958	rs2877839	125058001	125058001	0	3.23e-13	-20.3967	2.70612	-2043	Promoter eGene
ENSG00000114544	SLC41A3	chr3	126006356	126101561	rs9876631:126103662:C:T	126384819	126384819	1	3.85e-05	-0.328359	0.0788738	-118023	Distal non-eGene
ENSG00000163870	TPRA1	chr3	127573070	127598251	rs62264113:127292333:G:A	127573490	127573490	0	1.45e-13	-1.06593	0.139231	-1055717	Distal non-eGene
ENSG00000114631	PODXL2	chr3	127629182	127672809	rs114895876:127352970:A:G	127634127	127634127	0	8.25e-07	-4.9483	0.988028	-35876	Distal non-eGene
ENSG00000187715	KBTBD12	chr3	127915233	127987671	rs1469656:127678804:C:T	127959961	127959961	1	3.99e-13	0.495231	0.065982	-388123	Distal non-eGene
ENSG00000187715	KBTBD12	chr3	127915233	127987671	rs72983933:127692441:G:A	127973598	127973598	0	9.02e-29	-1.66877	0.138426	-401760	Distal non-eGene
ENSG00000175792	RUVBL1	chr3	128064779	128153914	rs11715394:127893564:A:T	128174721	128174721	0	2.67e-16	1.79174	0.209617	288873	Distal non-eGene
ENSG00000132394	EEFSEC	chr3	128153455	128408646	rs78175151:128197806:G:C	128478963	128478963	0	5.34e-05	0.810624	0.198476	-11715	Distal non-eGene
ENSG00000163902	RPN1	chr3	128619971	128681075	rs11385470:128342393:A:AT	128623550	128623550	0	7.72e-22	-0.651357	0.0639198	-469636	Distal non-eGene
ENSG00000163902	RPN1	chr3	128619971	128681075	rs7638528:128402352:G:T	128683509	128683509	1	8.05e-06	0.352998	0.07805	42613	Distal non-eGene
ENSG00000251474	RPL32P3	chr3	129382923	129399655	rs2285353	129492024	129492024	1	6.3e-07	0.858061	0.169471	-51988	Distal non-eGene
ENSG00000163913	IFT122	chr3	129440037	129520507	rs2260840:129234259:T:C	129515416	129515416	0	7.75e-18	-2.74493	0.304248	-75380	Distal eGene
ENSG00000114670	NEK11	chr3	131026851	131350465	rs202100557:130596458:G:GC	130877614	130877614	0	9.41e-19	0.804131	0.0864924	-584277	Distal non-eGene
ENSG00000196353	CPNE4	chr3	131533556	132285410	rs6765804:131747762:A:C	132028918	132028918	0	4.92e-11	-0.732288	0.108343	256492	Distal eGene
ENSG00000138246	DNAJC13	chr3	132417527	132539032	rs9833627:132242642:C:T	132523798	132523798	0	1.4e-06	-2.94794	0.601674	136925	Distal non-eGene
ENSG00000113971	NPHP3	chr3	132680610	132722442	rs12486323	132711960	132711960	0	5.21e-58	-10.6878	0.561543	326431	Distal non-eGene
ENSG00000260633	RP11-375I20.6	chr3	134347289	134349233	rs4974497:134072530:A:G	134353688	134353688	0	1.29e-72	-1.07736	0.0481181	21791	Distal non-eGene
ENSG00000129055	ANAPC13	chr3	134477707	134486716	rs9847788:134186496:A:C	134467654	134467654	0	4.3e-32	0.823681	0.0638459	-216910	Distal non-eGene
ENSG00000129055	ANAPC13	chr3	134477707	134486716	rs62269521:134191627:G:C	134472785	134472785	1	5.39e-05	-0.940096	0.230294	-222041	Distal non-eGene
ENSG00000073711	PPP2R3A	chr3	135965674	136147891	rs35188750:135672088:G:C	135953246	135953246	0	4.05e-07	0.655783	0.12728	-1355445	Distal non-eGene
ENSG00000239213	NCK1-AS1	chr3	136841727	136862054	rs185931403:136115554:G:A	136396712	136396712	1	5.14e-09	-1.68666	0.282382	355691	Distal non-eGene
ENSG00000273486	RP11-731C17.2	chr3	136837339	136839021	rs34349896:136586095:G:GTC	136867253	136867253	1	1.37e-06	0.393356	0.0802094	-901580	Distal non-eGene
ENSG00000239213	NCK1-AS1	chr3	136841727	136862054	rs7434143:136600667:G:T	136881825	136881825	0	1.58e-19	0.693012	0.0727469	-916152	Distal non-eGene
ENSG00000181322	NME9	chr3	138261438	138329886	rs13087441:138042669:G:A	138323827	138323827	0	1.81e-06	-0.321929	0.0664383	6059	Distal eGene
ENSG00000184432	COPB2	chr3	139355601	139389732	rs35109875:139107468:GT:G	139388626	139388627	0	5.21e-14	3.76891	0.482846	-382820	Distal non-eGene
ENSG00000114115	RBP1	chr3	139517435	139539829	rs9825927:139271063:T:G	139552221	139552221	0	5.51e-26	2.86471	0.252958	-162406	Distal non-eGene
ENSG00000250543	RP11-442N1.1	chr3	139688404	139689342	rs9845929	139686016	139686016	0	1.34e-06	-2.37112	0.483168	-296201	Distal non-eGene
ENSG00000163864	NMNAT3	chr3	139560181	139678017	rs10935342:139405342:T:C	139686500	139686500	0	6.46e-07	-0.400173	0.0791148	-296685	Distal non-eGene
ENSG00000177311	ZBTB38	chr3	141324214	141449792	rs2871960	141402972	141402972	0	1.23e-14	6.59278	0.822729	-78759	Distal eGene
ENSG00000120756	PLS1	chr3	142596388	142713664	rs35772119:142310692:G:GA	142591850	142591850	0	1.24e-07	2.59756	0.482434	4537	Distal eGene
ENSG00000163710	PCOLCE2	chr3	142815923	142889203	rs6794287:142602666:C:T	142883824	142883824	0	1.43e-44	1.3893	0.0872708	42851	Distal non-eGene
ENSG00000241570	PAQR9-AS1	chr3	142960651	143001559	rs251488:142701110:A:T	142982268	142982268	0	1.14e-27	-3.39235	0.288247	-21618	Distal eGene
ENSG00000188582	PAQR9	chr3	142949165	142963682	rs251488:142701110:A:T	142982268	142982268	0	4.04e-18	-0.956196	0.104989	-18586	Distal eGene
ENSG00000261051	RP11-274H2.5	chr3	146059586	146061679	rs150242821:145837902:A:AT	146120115	146120115	0	3.1e-07	1.58303	0.304127	-56073	Distal non-eGene
ENSG00000240032	RP11-274H2.3	chr3	146066345	146069185	rs6793380:145873068:G:A	146155281	146155281	0	4.92e-07	-0.20068	0.0392476	-91239	Distal non-eGene
ENSG00000114698	PLSCR4	chr3	146192340	146251179	exm356986	146199974	146199974	1	4.75e-16	0.59424	0.0701691	406242	Distal non-eGene
ENSG00000018408	WWTR1	chr3	149517236	149736714	rs13325622:149373380:T:C	149655593	149655593	0	1.23e-06	-1.15399	0.234253	81121	Distal eGene
ENSG00000114744	COMMD2	chr3	149738471	149752499	rs11354448:149469618:CT:C	149751831	149751832	0	2.87e-23	2.10548	0.198845	-277857	Distal non-eGene
ENSG00000144895	EIF2A	chr3	150546679	150584242	rs17280260:150264779:G:A	150546992	150546992	1	3.34e-05	-0.61077	0.145553	-496204	Distal non-eGene
ENSG00000152601	MBNL1	chr3	152243829	152465780	rs323621:151938468:T:G	152220679	152220679	0	3.18e-08	-8.57285	1.51951	23149	Distal eGene
ENSG00000169860	P2RY1	chr3	152834694	152841439	rs9871889:152746214:T:A	153028425	153028425	1	1.36e-07	0.38294	0.0713575	951761	Distal non-eGene
ENSG00000181467	RAP2B	chr3	153162271	153170620	rs9814144	153028434	153028434	0	1.46e-18	1.27391	0.13787	951752	Distal non-eGene
ENSG00000114790	ARHGEF26	chr3	154121004	154257827	rs12638897:154045850:T:C	154328061	154328061	0	1.34e-06	4.12951	0.841441	1417006	Distal non-eGene
ENSG00000169282	KCNAB1	chr3	156037702	156539138	rs1129109:156259279:C:T	156541490	156541490	0	7.72e-10	-2.03581	0.323008	-503789	Distal eGene
ENSG00000272990	RP11-305K5.1	chr3	156523741	156524247	rs8665:156259485:G:A	156541696	156541696	0	6.37e-06	0.176604	0.0386054	-503995	Distal non-eGene
ENSG00000114850	SSR3	chr3	156540141	156555184	rs3773716:156266880:C:T	156549091	156549091	0	1.38e-08	1.64083	0.283152	-511390	Distal non-eGene
ENSG00000240875	LINC00886	chr3	156747347	156817062	rs1397193:156359280:T:G	156641491	156641491	3	5.01e-07	0.513916	0.100581	-603790	Distal non-eGene
ENSG00000240875	LINC00886	chr3	156747347	156817062	rs113914845:156542984:C:G	156825195	156825195	0	6.98e-11	1.04373	0.155726	-151960	Distal non-eGene
ENSG00000197980	LEKR1	chr3	156825482	157046129	rs344072:156546675:T:G	156828886	156828886	0	8.98e-25	0.489227	0.0444769	-155651	Distal non-eGene
ENSG00000168827	GFM1	chr3	158644279	158692575	rs61079797:158369613:AT:A	158651824	158651825	0	1.09e-37	-0.871264	0.0610168	80374	Distal non-eGene
ENSG00000118849	RARRES1	chr3	158696893	158732696	rs74738078:158438211:CAA:C	158720422	158720424	0	3.77e-22	1.13664	0.110591	11776	Distal non-eGene
ENSG00000118855	MFSD1	chr3	158732199	158829719	rs4680459:158443856:A:G	158726067	158726067	0	5.09e-10	-1.37459	0.215678	6131	Distal eGene
ENSG00000279311	RP11-170K4.2	chr3	158869899	158871821	rs6778714	158844344	158844344	0	5.03e-10	0.466022	0.0730977	118584	Distal non-eGene
ENSG00000163590	PPM1L	chr3	160755603	161078907	rs7631479:161139566:C:T	161421778	161421778	0	1.36e-05	2.20224	0.499901	-666176	Distal eGene
ENSG00000169064	ZBBX	chr3	167240288	167381346	rs73169191:167096412:C:T	167378624	167378624	0	8.24e-08	0.171131	0.0313257	356315	Distal non-eGene
ENSG00000163536	SERPINI1	chr3	167735244	167825568	rs59710391:167529472:TA:T	167811684	167811685	0	3.44e-09	5.36314	0.887331	-76745	Distal non-eGene
ENSG00000269984	RP11-362K14.5	chr3	169777193	169780334	rs9878797	169812170	169812170	0	7.14e-30	-0.61003	0.049441	154465	Distal non-eGene
ENSG00000171757	LRRC34	chr3	169793429	169812986	rs9878797	169812170	169812170	0	5.56e-40	-3.24351	0.2187	154465	Distal non-eGene
ENSG00000244039	RP11-379K17.2	chr3	169931999	169933229	rs144942761:169612527:C:CTAAATAAATAAATAAA	169894739	169894739	0	5.05e-06	-2.02416	0.43762	-81753	Distal non-eGene
ENSG00000173890	GPR160	chr3	170037930	170085403	rs1352204:169816510:C:T	170098722	170098722	0	4.84e-08	7.95471	1.42983	-60793	Distal eGene
ENSG00000163584	RPL22L1	chr3	170864876	170870483	rs76646178:170763129:T:C	171045340	171045340	0	2.56e-05	-0.285884	0.0671184	415068	Distal non-eGene
ENSG00000154310	TNIK	chr3	171061340	171460408	rs13060086:171177576:A:G	171459787	171459787	0	3.56e-06	-5.91246	1.25767	621	Promoter eGene
ENSG00000144959	NCEH1	chr3	172630250	172711218	rs13323236:172425597:T:C	172707807	172707807	0	9.92e-07	-3.1504	0.633835	3411	Distal eGene
ENSG00000171121	KCNMB3	chr3	179236692	179267002	rs4955794:178779275:G:A	179061487	179061487	2	3.2e-05	-0.292436	0.0695149	261504	Distal non-eGene
ENSG00000240429	LRRFIP1P1	chr3	179259029	179261273	rs113000836:178980404:A:G	179262616	179262616	0	6.36e-10	0.533075	0.0841413	-114643	Distal non-eGene
ENSG00000171121	KCNMB3	chr3	179236692	179267002	rs6781173	179270776	179270776	0	1.15e-09	0.536383	0.0860345	-122803	Distal non-eGene
ENSG00000242539	AC007620.3	chr3	179396962	179399191	rs17358468:179027192:C:T	179309404	179309404	0	1.18e-05	-0.106571	0.0240184	-237125	Distal non-eGene
ENSG00000260743	RP11-255C15.3	chr3	179340323	179341887	rs6805876	179340714	179340714	0	4.12e-06	0.0966499	0.0206963	-192741	Distal non-eGene
ENSG00000171109	MFN1	chr3	179347693	179394931	rs6804758:179070454:C:T	179352666	179352666	0	1.63e-55	5.25587	0.284728	210214	Distal non-eGene
ENSG00000136521	NDUFB5	chr3	179604691	179627647	rs4147789:179331272:T:G	179613484	179613484	0	1.01e-06	-0.345997	0.0696639	-265792	Distal non-eGene
ENSG00000114757	PEX5L	chr3	179794959	180037053	rs7610744:179635134:T:A	179917346	179917346	0	5.27e-07	-4.25732	0.834895	684589	Distal non-eGene
ENSG00000176597	B3GNT5	chr3	183253245	183298504	rs571761:182912526:C:G	183194738	183194738	0	4.44e-06	0.220889	0.047469	234040	Distal non-eGene
ENSG00000240024	LINC00888	chr3	183447609	183456013	rs78046106:183156963:C:T	183439175	183439175	0	4.96e-26	-0.871874	0.0769064	-10397	Distal non-eGene
ENSG00000161204	ABCF3	chr3	184186024	184194012	rs16833781:183903935:C:CG	184186147	184186147	1	5.57e-13	0.489262	0.0656237	-30759	Distal non-eGene
ENSG00000161203	AP2M1	chr3	184174690	184184091	rs56351888:183904226:C:T	184186438	184186438	0	9.01e-08	-7.15546	1.31395	-31050	Distal non-eGene
ENSG00000145194	ECE2	chr3	184249651	184293031	rs56172794:184001146:C:T	184283358	184283358	0	7.42e-12	-0.480842	0.0681149	-372422	Distal non-eGene
ENSG00000161204	ABCF3	chr3	184186024	184194012	rs112718059:184004748:T:A	184286960	184286960	0	6.22e-16	1.6737	0.198504	-402036	Distal non-eGene
ENSG00000145194	ECE2	chr3	184249651	184293031	exm368871	184321878	184321878	1	3.85e-05	-0.330128	0.0793007	-166490	Distal non-eGene
ENSG00000163882	POLR2H	chr3	184361719	184368596	rs9845144:184056716:G:A	184338928	184338928	0	4.69e-05	-0.439166	0.106701	-24433	Distal non-eGene
ENSG00000240024	LINC00888	chr3	183447609	183456013	rs202193300:184085280:C:CT	184367492	184367492	1	3.33e-05	-0.434549	0.103525	189426	Distal non-eGene
ENSG00000114867	EIF4G1	chr3	184314496	184335358	rs9990365:184292055:G:C	184574267	184574267	0	1.87e-05	1.98016	0.457048	198888	Distal non-eGene
ENSG00000177383	MAGEF1	chr3	184710368	184712002	exm369679	184711115	184711115	0	1.33e-12	-1.48552	0.202829	-149331	Distal non-eGene
ENSG00000073803	MAP3K13	chr3	185282942	185489097	rs9290833:186188610:G:T	186470821	186470821	1	1.8e-05	0.323974	0.0746344	-510878	Distal non-eGene
ENSG00000090520	DNAJB11	chr3	186567404	186585800	rs12330875:186285986:C:T	186568197	186568197	0	6.93e-08	1.66928	0.303738	-630061	Distal non-eGene
ENSG00000213139	CRYGS	chr3	186538442	186546702	rs3733160:186288810:G:A	186571021	186571021	0	1.37e-06	-0.526787	0.107429	-745965	Distal non-eGene
ENSG00000163918	RFC4	chr3	186789881	186807058	rs57733138:186513815:TACAC:T	186796026	186796030	0	5.46e-52	-2.61637	0.148265	-225483	Distal non-eGene
ENSG00000152492	CCDC50	chr3	191329078	191398670	rs4677633:191122293:A:G	191404504	191404504	1	3.89e-06	0.339469	0.0724998	1363260	Distal non-eGene
ENSG00000127249	ATP13A4	chr3	193402078	193593111	rs56401314:193300423:C:T	193582634	193582634	0	6.08e-12	-0.727522	0.102607	10477	Distal eGene
ENSG00000231770	TMEM44-AS1	chr3	194584012	194590260	rs12485494:194294509:C:G	194573780	194573780	0	9.79e-35	1.26834	0.0935473	-75416	Distal non-eGene
ENSG00000231770	TMEM44-AS1	chr3	194584012	194590260	rs34351243:194299840:C:CT	194579111	194579111	1	4.14e-06	-0.586297	0.125576	-80747	Distal non-eGene
ENSG00000041802	LSG1	chr3	194640789	194672477	rs112097663:194377712:C:T	194656983	194656983	0	9.37e-63	1.32628	0.0659131	614184	Distal non-eGene
ENSG00000041802	LSG1	chr3	194640789	194672477	rs3075272:194411229:C:CAAG	194690500	194690500	1	2.2e-05	-0.327283	0.0762193	580667	Distal non-eGene
ENSG00000273009	RP11-352G9.1	chr3	195913079	195913683	rs151017233:195640582:AGCT:A	195913711	195913714	1	2.2e-05	-1.00376	0.233734	-1766	Promoter non-eGene
ENSG00000224769	MUC20P1	chr3	195614948	195620233	rs62284390:195648485:C:T	195921614	195921614	2	1.86e-08	1.18123	0.20577	-61210	Distal non-eGene
ENSG00000161217	PCYT1A	chr3	196214223	196287957	rs58954032:195961123:C:T	196234252	196234252	0	1.22e-05	1.17291	0.264787	-152063	Distal non-eGene
ENSG00000213123	TCTEX1D2	chr3	196291220	196318299	rs113938332:196036818:C:CA	196309947	196309947	0	6.93e-16	0.765536	0.0909561	-21990	Distal non-eGene
ENSG00000235897	TM4SF19-AS1	chr3	196318331	196325570	exm376436	196323991	196323991	0	3.76e-13	2.0637	0.274631	108483	Distal non-eGene
ENSG00000163960	UBXN7	chr3	196347663	196432474	rs200498406:196123267:TAA:T	196396396	196396398	0	5.01e-06	-3.51133	0.758824	36078	Distal eGene
ENSG00000235897	TM4SF19-AS1	chr3	196318331	196325570	rs60528354:196147401:CA:C	196420530	196420531	1	5.12e-08	0.443065	0.0797885	-102308	Distal non-eGene
ENSG00000228109	MFI2-AS1	chr3	196999461	197004744	rs73075071:196258510:G:A	196531639	196531639	0	9.9e-06	0.253883	0.0567147	-243682	Distal non-eGene
ENSG00000174013	FBXO45	chr3	196568612	196589059	rs11297150:196313772:GA:G	196586901	196586902	0	4.77e-10	-1.33991	0.209884	52874	Distal non-eGene
ENSG00000174007	CEP19	chr3	196706278	196712293	rs78252395:196423132:T:C	196696261	196696261	2	1.24e-05	-0.782378	0.1768	-127650	Distal non-eGene
ENSG00000174007	CEP19	chr3	196706278	196712293	rs71323742:196439124:C:G	196712253	196712253	0	7.51e-18	-0.80085	0.0887265	-143579	Distal non-eGene
ENSG00000270170	NCBP2-AS2	chr3	196942624	196943540	rs7642425:196648906:A:G	196922035	196922035	0	4.79e-32	0.840404	0.0652009	-182178	Distal non-eGene
ENSG00000242686	RP11-1191J2.2	chr4	652851	656213	rs28470912:665737:C:T	671948	671948	0	1.13e-26	-1.48024	0.128638	-46364	Distal non-eGene
ENSG00000168936	TMEM129	chr4	1715953	1721358	rs35206670:1745807:GGGGGCAGCAGC:G	1744080	1744091	0	3.74e-11	-1.10988	0.163144	112167	Distal non-eGene
ENSG00000173011	TADA2B	chr4	7041900	7057952	rs9986037:7050610:G:A	7048883	7048883	0	6.95e-18	4.10725	0.454528	19314	Distal non-eGene
ENSG00000109519	GRPEL1	chr4	7058907	7068197	rs2358718:7068743:G:T	7067016	7067016	0	8.18e-43	-4.73817	0.305595	-157774	Distal non-eGene
ENSG00000118564	FBXL5	chr4	15604540	15681679	rs35373918:15647991:A:AT	15646368	15646368	0	5.38e-08	4.71322	0.850192	-176503	Distal non-eGene
ENSG00000169762	TAPT1	chr4	16160506	16227410	rs1356415:16057824:G:A	16056201	16056201	2	9.72e-06	0.68088	0.15196	171209	Distal eGene
ENSG00000007062	PROM1	chr4	15963077	16084378	rs78824243:16080821:A:G	16079198	16079198	0	2.24e-06	52.9346	11.0271	148212	Distal non-eGene
ENSG00000154274	C4orf19	chr4	37453942	37623495	rs1105930	37401859	37401859	0	1.74e-12	0.527932	0.0724867	-1120237	Distal non-eGene
ENSG00000224097	RP11-472B18.1	chr4	39480256	39481905	rs1048140:39478832:G:A	39477212	39477212	0	2.5e-14	-0.198999	0.0251523	500744	Distal non-eGene
ENSG00000163281	GNPDA2	chr4	44682201	44726595	rs6852372:44651820:G:A	44649803	44649803	0	6.87e-06	0.835822	0.183377	-1515936	Distal non-eGene
ENSG00000145247	OCIAD2	chr4	48885020	48906937	rs2572352:48964357:C:G	48962340	48962340	0	3.16e-22	3.64423	0.353841	-182018	Distal non-eGene
ENSG00000138744	NAAA	chr4	75913658	75941051	rs10690496:76916256:G:GTCT	75995103	75995103	0	9.39e-28	-6.27554	0.532229	16081	Distal non-eGene
ENSG00000152784	PRDM8	chr4	80183880	80204329	rs34319350:81130714:A:C	80209560	80209560	0	1.17e-06	5.12585	1.03859	-1270122	Distal non-eGene
ENSG00000272677	RP11-127B20.3	chr4	82374302	82384027	rs113806092:83296110:GT:G	82374957	82374958	0	3.65e-05	-0.28638	0.0685883	55451	Distal non-eGene
ENSG00000246090	RP11-696N14.1	chr4	99088858	99301356	rs116837684:100041788:C:G	99120637	99120637	0	3.55e-34	1.07226	0.0798985	315100	Distal non-eGene
ENSG00000164039	BDH2	chr4	103079436	103099883	rs6830624:104020422:T:C	103099265	103099265	0	2.66e-22	0.716595	0.0694363	-597936	Distal non-eGene
ENSG00000138778	CENPE	chr4	103105807	103198409	rs149659006:104023500:ATATTTTT:A	103102343	103102350	0	1.7e-21	0.600303	0.0594751	-601014	Distal non-eGene
ENSG00000188517	COL25A1	chr4	108810722	109302657	rs10032342:110199163:T:C	109278007	109278007	0	1.07e-23	-1.06904	0.0998512	24650	Distal eGene
ENSG00000183423	LRIT3	chr4	109848203	109872315	rs115318911:110719675:T:A	109798519	109798519	0	3.87e-05	5.71322	1.37277	-364702	Distal non-eGene
ENSG00000005059	CCDC109B	chr4	109560206	109688726	rs201754254:110903470:TTTTTTC:T	109982314	109982320	1	4.94e-05	-0.814548	0.198519	-548497	Distal non-eGene
ENSG00000164100	NDST3	chr4	118033619	118258648	rs618177:119146315:T:C	118225160	118225160	0	9.71e-12	0.885775	0.12623	-1928000	Distal non-eGene
ENSG00000269893	SNHG8	chr4	118278710	118279823	rs67330081:119148762:CTTT:C	118227607	118227610	1	5.25e-08	-0.466963	0.0841631	-1930447	Distal non-eGene
ENSG00000173376	NDNF	chr4	121035614	121073021	rs13142482	121103385	121103385	1	5.18e-08	0.42257	0.0761265	-1036427	Distal non-eGene
ENSG00000138741	TRPC3	chr4	121879028	121951754	rs13145213	121828924	121828924	0	4.11e-20	0.63241	0.0652184	323409	Distal non-eGene
ENSG00000251432	RP11-420A23.1	chr4	128292752	128519394	rs72677887:129349033:G:C	128427878	128427878	0	9.34e-25	0.952914	0.0866682	381745	Distal non-eGene
ENSG00000181541	MAB21L2	chr4	150581923	150584693	rs111743539:150930410:GA:G	150009258	150009259	0	3.61e-07	1.32324	0.255684	69016	Distal non-eGene
ENSG00000120251	GRIA2	chr4	157204183	157366075	rs6849345:158140129:A:G	157218977	157218977	0	5.78e-08	0.595408	0.107666	750638	Distal non-eGene
ENSG00000198498	TMA16	chr4	163494443	163520539	rs2221840:164469097:C:T	163547945	163547945	0	1.71e-08	0.39386	0.068427	836105	Distal non-eGene
ENSG00000145439	CBR4	chr4	168863771	169010275	rs6553402:169939843:A:G	169018692	169018692	0	5.24e-07	-1.38803	0.272138	593937	Distal non-eGene
ENSG00000164118	CEP44	chr4	174283678	174333380	rs17060395:175137313:T:C	174216162	174216162	0	6.75e-09	0.53945	0.0910556	-688892	Distal non-eGene
ENSG00000168491	CCDC110	chr4	185445183	185471759	rs9999033:186391323:G:A	185470169	185470169	0	3.2e-19	0.95559	0.10127	486483	Distal non-eGene
ENSG00000250056	LINC01018	chr5	6582137	6588499	rs10056882:6585072:C:T	6584959	6584959	1	3.2e-05	0.33397	0.0793927	-1164295	Distal non-eGene
ENSG00000113360	DROSHA	chr5	31400498	31532196	rs143067465:31577030:CG:C	31576923	31576924	1	1.59e-06	0.40412	0.0829381	62487	Distal non-eGene
ENSG00000164327	RICTOR	chr5	38937920	39074408	rs13184911:39075394:C:T	39075292	39075292	0	8.5e-39	0.824502	0.0566796	-884	Promoter eGene
ENSG00000172244	C5orf34	chr5	43486702	43515145	rs70991448:42952977:AT:A	42952875	42952876	0	9.89e-05	-0.0781581	0.0198732	114544	Distal non-eGene
ENSG00000058729	RIOK2	chr5	97160868	97183260	rs3839294:96504130:CT:C	97168426	97168427	0	2.94e-40	-3.31154	0.222294	-643159	Distal non-eGene
ENSG00000224032	EPB41L4A-AS1	chr5	112160527	112164276	rs17266771:111506751:T:C	112171054	112171054	1	2.32e-11	-0.651735	0.094733	248529	Distal non-eGene
ENSG00000047188	YTHDC2	chr5	113513684	113595285	rs57617774:112867308:C:G	113531611	113531611	0	2.2e-23	-5.63246	0.530335	-554909	Distal non-eGene
ENSG00000064692	SNCAIP	chr5	122311355	122464219	rs7446040:121530610:G:C	122194915	122194915	0	8.62e-08	-0.246112	0.0451238	1317184	Distal non-eGene
ENSG00000164904	ALDH7A1	chr5	126531201	126595418	rs10068152:125683917:T:C	126348225	126348225	3	1.22e-05	-0.310923	0.0701817	247193	Distal eGene
ENSG00000164398	ACSL6	chr5	131949974	132012243	rs12054732:130969724:T:C	131634031	131634031	2	0.000112126	0.35397	0.0907287	378212	Distal eGene
ENSG00000213585	VDAC1	chr5	133971916	134005133	rs10074800:132951164:C:T	133615473	133615473	1	3.55e-05	1.10702	0.264715	-2909	Distal non-eGene
ENSG00000243056	EIF4EBP3	chr5	140547667	140549578	rs1862176:139730444:G:A	140350859	140350859	0	2.84e-05	-0.183691	0.0433805	-176217	Distal non-eGene
ENSG00000120306	CYSTM1	chr5	140174643	140282052	rs148468134:139741471:CCCTTT:C	140361886	140361891	2	5.88e-08	-1.00872	0.182507	-187244	Distal eGene
ENSG00000249158	PCDHA11	chr5	140868184	141012344	rs77020201:140240800:A:G	140861215	140861215	1	4.35e-08	0.636425	0.113979	235187	Distal non-eGene
ENSG00000272674	PCDHB16	chr5	141181400	141186399	rs71583615:140405317:G:A	141025732	141025732	2	3.19e-05	-0.594559	0.141323	-239596	Distal non-eGene
ENSG00000243232	PCDHAC2	chr5	140966236	141012344	rs12523487:140426268:G:C	141046683	141046683	0	5.2e-07	3.12978	0.613444	-260547	Distal non-eGene
ENSG00000253485	PCDHGA5	chr5	141364233	141512979	rs10044763:140937935:T:C	141558368	141558368	1	3.23e-05	-0.6648	0.158109	-227797	Distal non-eGene
ENSG00000253953	PCDHGB4	chr5	141387699	141512979	rs79935113:140938516:A:G	141558949	141558949	0	2.39e-08	1.48357	0.260492	-228378	Distal non-eGene
ENSG00000146001	PCDHB18P	chr5	141234334	141237529	rs78127854:141063158:C:A	141683591	141683591	1	4.93e-05	0.728737	0.177588	286150	Distal non-eGene
ENSG00000081791	KIAA0141	chr5	141923809	141942047	rs56390916:141261835:C:T	141882270	141882270	0	3.97e-07	-2.64068	0.51213	-200049	Distal non-eGene
ENSG00000013561	RNF14	chr5	141958329	141990291	rs252111:141385250:T:C	142005685	142005685	0	1.22e-08	2.11272	0.363163	102820	Distal non-eGene
ENSG00000183775	KCTD16	chr5	144170833	144485686	rs2112659:143591023:A:G	144211460	144211460	0	4.38e-07	-0.606604	0.118097	1017351	Distal non-eGene
ENSG00000113657	DPYSL3	chr5	147390812	147510056	rs1121657:146827429:C:A	147447866	147447866	0	5.27e-06	28.9321	6.26739	112128	Distal non-eGene
ENSG00000248647	RP11-331K21.1	chr5	149163956	149276776	rs13153921:148522498:A:G	149142935	149142935	1	2.62e-12	0.491832	0.0681181	133841	Distal eGene
ENSG00000173210	ABLIM3	chr5	149141484	149260542	rs70973510:148604794:A:ACCTCTATCTAGTTCC	149225231	149225231	0	9.53e-12	-8.83117	1.25798	-83748	Distal eGene
ENSG00000145882	PCYOX1L	chr5	149358008	149369653	rs13160429:148764914:A:G	149385351	149385351	0	1.19e-12	0.486198	0.0662257	21338	Distal non-eGene
ENSG00000113716	HMGXB3	chr5	150000047	150053142	rs140461335:149377690:TCAAA:T	149998127	149998131	1	8.38e-07	0.555299	0.110951	-267829	Distal non-eGene
ENSG00000155508	CNOT8	chr5	154857554	154876793	rs34165383:154026473:C:G	154646913	154646913	0	5.12e-05	-1.43814	0.351234	65989	Distal non-eGene
ENSG00000113272	THG1L	chr5	157731198	157741448	rs2270820	157731364	157731364	0	1.82e-15	0.608286	0.0734437	-465285	Distal non-eGene
ENSG00000164609	SLU7	chr5	160401642	160421711	rs2910176:159818781:C:T	160391774	160391774	1	1.29e-10	-0.592202	0.0897019	-382661	Distal non-eGene
ENSG00000221886	ZBED8	chr5	160393149	160400097	rs2961934:159825190:T:A	160398183	160398183	0	2.48e-06	0.932174	0.195074	-389070	Distal non-eGene
ENSG00000181163	NPM1	chr5	171387117	171411137	rs147108643:170839674:CTTTTTTT:C	171412670	171412677	0	1.23e-05	-4.25356	0.960715	594203	Distal non-eGene
ENSG00000113739	STC2	chr5	173314714	173329503	rs7717222:172999225:A:G	173572222	173572222	0	2.66e-08	-3.82002	0.673146	-279603	Distal non-eGene
ENSG00000145919	BOD1	chr5	173607515	173616660	rs7717222:172999225:A:G	173572222	173572222	2	2.4e-05	-0.385443	0.0901729	-279603	Distal non-eGene
ENSG00000113742	CPEB4	chr5	173888281	173961976	rs10054063:173392398:A:T	173965395	173965395	0	4.55e-07	-6.51327	1.26997	-348735	Distal non-eGene
ENSG00000184845	DRD1	chr5	175440040	175444208	rs265976:174862420:G:T	175435417	175435417	0	1.21e-05	-0.44162	0.0996484	-439904	Distal non-eGene
ENSG00000145911	N4BP3	chr5	178113444	178126087	rs13185017:177578638:C:G	178151637	178151637	0	1.83e-08	0.509341	0.0886684	-38194	Distal eGene
ENSG00000178338	ZNF354B	chr5	178859954	178888122	rs200813364:178484868:A:AAAAT	179057867	179057867	0	1.2e-05	-1.08009	0.243606	-197914	Distal eGene
ENSG00000145949	MYLK4	chr6	2663630	2750966	rs2038760:2680732:C:T	2680498	2680498	0	2.08e-15	0.762763	0.0922977	-434806	Distal non-eGene
ENSG00000224846	RP1-90J20.8	chr6	2989723	2999134	rs9378351:2999243:C:T	2999009	2999009	0	1.8e-64	0.722997	0.0352416	64982	Distal non-eGene
ENSG00000137274	BPHL	chr6	3118375	3153578	rs11970389:3250656:C:T	3250422	3250422	1	1.38e-06	-0.920479	0.187782	-132048	Distal eGene
ENSG00000180822	PSMG4	chr6	3231404	3303373	rs6596960:3260924:C:G	3260690	3260690	0	1.89e-18	-2.52147	0.273869	491336	Distal non-eGene
ENSG00000197977	ELOVL2	chr6	10980760	11044314	rs7745438:10957766:C:T	10957533	10957533	1	3.17e-05	-0.336236	0.0798899	85991	Distal non-eGene
ENSG00000224531	SMIM13	chr6	11094034	11138733	rs9380116:11153404:A:G	11153171	11153171	0	2.06e-07	1.69413	0.320524	334055	Distal non-eGene
ENSG00000145979	TBC1D7	chr6	13266543	13328583	rs507369:13332060:G:T	13331828	13331828	0	1.86e-13	1.09907	0.144258	-615023	Distal non-eGene
ENSG00000272379	RP1-257A7.5	chr6	13290019	13290490	rs3001962:13335940:C:T	13335708	13335708	1	1.89e-06	0.469401	0.0970711	375856	Distal non-eGene
ENSG00000271888	RP11-560J1.2	chr6	15243924	15245000	rs7771939:15269455:G:A	15269224	15269224	0	9.74e-11	0.233583	0.0351366	393834	Distal non-eGene
ENSG00000260455	NBAT1	chr6	22134958	22147193	rs72836115:22148017:T:C	22147788	22147788	0	1.56e-05	-0.23877	0.0546009	-552195	Distal non-eGene
ENSG00000079691	LRRC16A	chr6	25279079	25620530	rs74943715:25263333:A:AACG	25263105	25263105	0	3.52e-23	-0.795272	0.0752802	15973	Distal eGene
ENSG00000276966	HIST1H4E	chr6	26204553	26206038	rs9885619:25602477:C:G	25602249	25602249	0	6.29e-09	1.11903	0.18848	-340838	Distal non-eGene
ENSG00000180573	HIST1H2AC	chr6	26124146	26139116	rs77750727:25604496:G:A	25604268	25604268	0	4.81e-06	5.54257	1.19548	-342857	Distal non-eGene
ENSG00000124613	ZNF391	chr6	27374616	27403904	rs137988367:27340462:A:ATTTTATTTTTATT	27372683	27372683	1	2.24e-05	0.485484	0.113157	100435	Distal non-eGene
ENSG00000161896	IP6K3	chr6	33721671	33746905	exm539552	33691695	33691695	1	5.12e-10	-0.418177	0.0656244	-151649	Distal non-eGene
ENSG00000137288	UQCC2	chr6	33694294	33711727	rs113148757:33661059:CCT:C	33693282	33693284	1	6.97e-08	-1.2465	0.226859	-153236	Distal non-eGene
ENSG00000137288	UQCC2	chr6	33694294	33711727	rs10672:33662265:T:C	33694488	33694488	0	4.66e-30	-0.765252	0.0617834	-154442	Distal non-eGene
ENSG00000161896	IP6K3	chr6	33721671	33746905	rs487835:33710933:G:A	33743156	33743156	0	9.77e-36	1.01966	0.0738666	412466	Distal non-eGene
ENSG00000161904	LEMD2	chr6	33771203	33789136	rs9366829:33773199:A:G	33805422	33805422	0	6.12e-11	-0.454803	0.0676434	350200	Distal non-eGene
ENSG00000161904	LEMD2	chr6	33771203	33789136	rs5875464:33777030:AT:A	33809253	33809254	1	2.73e-05	0.296521	0.069862	346369	Distal non-eGene
ENSG00000124562	SNRPC	chr6	34757407	34773794	rs4713746:34124888:G:A	34157111	34157111	0	1.77e-05	-0.473482	0.108988	-410206	Distal non-eGene
ENSG00000124614	RPS10	chr6	34417455	34426125	rs59104690:34352806:CAA:C	34385029	34385031	0	4e-06	0.621141	0.132838	-148156	Distal non-eGene
ENSG00000112041	TULP1	chr6	35497875	35512938	exm541395	35511797	35511797	0	4.72e-30	47.5882	3.84254	225150	Distal non-eGene
ENSG00000156711	MAPK13	chr6	36127810	36144524	rs9470086:35709678:C:A	35741901	35741901	4	1.33e-05	-1.23762	0.280634	-13318	Distal non-eGene
ENSG00000137413	TAF8	chr6	42050514	42087461	rs6925028:42051093:G:T	42083355	42083355	0	2.62e-08	-0.721199	0.127017	72051	Distal non-eGene
ENSG00000048544	MRPS10	chr6	42206802	42217865	rs60733582:42173975:AAG:A	42206237	42206239	0	8.99e-64	4.13843	0.20331	-155724	Distal non-eGene
ENSG00000112619	PRPH2	chr6	42696601	42722574	exm2270317	42691014	42691014	0	1.3e-08	-50.2997	8.66244	31560	Distal eGene
ENSG00000146223	RPL7L1	chr6	42879619	42889925	rs1150797:42841231:G:A	42873493	42873493	0	1.05e-12	-2.33197	0.316856	-309431	Distal non-eGene
ENSG00000237686	RP5-1120P11.1	chr6	43995724	44074652	rs77842723:43967345:C:T	43999608	43999608	1	5.13e-13	0.912836	0.122232	-229424	Distal non-eGene
ENSG00000237686	RP5-1120P11.1	chr6	43995724	44074652	rs78085268:43971842:A:G	44004105	44004105	0	4.22e-21	1.75913	0.176246	-233921	Distal non-eGene
ENSG00000181577	C6orf223	chr6	44000581	44005958	rs2273308:43972733:C:T	44004996	44004996	0	1.48e-05	0.537529	0.122567	-234812	Distal non-eGene
ENSG00000008196	TFAP2B	chr6	50818724	50847613	rs9381903:50773228:G:A	50805515	50805515	0	4.96e-06	-4.01448	0.867145	1282110	Distal non-eGene
ENSG00000112118	MCM3	chr6	52264010	52284881	exm555272	52264686	52264686	0	1.04e-05	-1.04586	0.234206	-177061	Distal non-eGene
ENSG00000216775	RP1-152L7.5	chr6	52665149	52669155	rs767311:52534702:G:A	52669904	52669904	0	9.86e-72	-1.18224	0.0532889	-308483	Distal non-eGene
ENSG00000156535	CD109	chr6	73695786	73828316	rs487673:74351030:A:G	73641307	73641307	0	1.62e-22	0.486425	0.0468619	-117510	Distal non-eGene
ENSG00000112706	IMPG1	chr6	75921116	76072678	rs5877465:76657574:TA:T	75947857	75947858	1	3.27e-05	0.295523	0.0703305	3130379	Distal non-eGene
ENSG00000146250	PRSS35	chr6	83512539	83525704	rs481687:84222177:C:T	83512458	83512458	0	2.39e-06	6.50981	1.36012	-81387	Distal non-eGene
ENSG00000203875	SNHG5	chr6	85660951	85678736	rs1059307:86387888:G:T	85678170	85678170	0	2.3e-75	4.95894	0.215367	-34378	Distal non-eGene
ENSG00000025039	RRAGD	chr6	89364637	89412270	rs854922:90121950:G:A	89412231	89412231	1	2.37e-05	-0.542497	0.126837	407492	Distal non-eGene
ENSG00000272398	CD24	chr6	106969832	106975627	rs694433:106784551:T:C	106336676	106336676	2	6.21e-06	0.354281	0.077353	24132	Distal non-eGene
ENSG00000025796	SEC63	chr6	107867757	107958189	rs11754713	107979708	107979708	0	1.48e-05	-3.11362	0.710036	315186	Distal non-eGene
ENSG00000135537	LACE1	chr6	108294895	108526796	rs113574332:108848063:G:A	108526860	108526860	0	7.08e-06	0.979232	0.215151	-541170	Distal non-eGene
ENSG00000080546	SESN1	chr6	108986438	109094819	rs68160205:109343252:A:ATT	109022049	109022049	0	3.38e-30	7.19276	0.579057	72770	Distal eGene
ENSG00000155085	AK9	chr6	109492857	109691217	exm571045	109506513	109506513	0	8.47e-21	-0.636765	0.0643558	909049	Distal non-eGene
ENSG00000197498	RPF2	chr6	110982016	111028263	rs35622659:111252445:T:TA	110931242	110931242	0	1.03e-10	-0.922451	0.138942	-115284	Distal non-eGene
ENSG00000111817	DSE	chr6	116254174	116444860	rs199661035:116539910:CTTTGTT:C	116218747	116218753	0	6.23e-13	-1.01644	0.136638	35426	Distal eGene
ENSG00000237021	RP3-486I3.7	chr6	116254208	116256743	rs199661035:116539910:CTTTGTT:C	116218747	116218753	0	1.88e-23	0.486604	0.0457368	35426	Distal non-eGene
ENSG00000187189	TSPYL4	chr6	116249962	116254140	rs1204833:116572828:A:G	116251665	116251665	0	5.49e-12	-4.30778	0.606207	-150816	Distal non-eGene
ENSG00000111817	DSE	chr6	116254174	116444860	rs17077741:116577145:A:G	116255982	116255982	1	2.57e-06	0.585869	0.1228	412812	Distal non-eGene
ENSG00000111834	RSPH4A	chr6	116616480	116632985	rs11269665:116946213:CCTTAAGGATAATCAAGTGG:C	116625050	116625069	1	2.05e-07	0.368308	0.0696663	-370877	Distal non-eGene
ENSG00000111832	RWDD1	chr6	116571368	116597675	rs11325619:116968546:AC:A	116647383	116647384	0	7.23e-06	-2.46145	0.541395	-393210	Distal non-eGene
ENSG00000111875	ASF1A	chr6	118894221	118909167	rs11542663:119215402:A:C	118894238	118894238	0	1.97e-05	-0.630831	0.146036	40924	Distal non-eGene
ENSG00000111877	MCM9	chr6	118813443	118935162	rs9387621:119294577:C:T	118973412	118973412	0	2.84e-23	1.08022	0.102004	175975	Distal non-eGene
ENSG00000111897	SERINC1	chr6	122443355	122471822	rs71541206:122782803:TA:T	122461658	122461659	0	2.12e-18	-0.81727	0.088915	-62112	Distal non-eGene
ENSG00000279453	RP3-425C14.4	chr6	122436790	122439223	rs693669:122786835:T:C	122465690	122465690	0	5.89e-25	-0.724353	0.0655588	-66144	Distal non-eGene
ENSG00000111906	HDDC2	chr6	125219963	125302078	rs73581685:125623247:C:T	125302101	125302101	0	6.89e-39	-1.17476	0.0806365	445563	Distal non-eGene
ENSG00000111906	HDDC2	chr6	125219963	125302078	rs9385367:125631035:G:A	125309889	125309889	1	8.32e-07	-0.433031	0.0864957	437775	Distal non-eGene
ENSG00000066651	TRMT11	chr6	125986431	126039276	rs141871928:126277880:G:T	125956734	125956734	1	8.37e-06	-0.787095	0.174366	-654656	Distal non-eGene
ENSG00000111911	HINT3	chr6	125956782	125980244	rs3757212	125966877	125966877	0	1.94e-07	-1.11821	0.211069	-185716	Distal non-eGene
ENSG00000066651	TRMT11	chr6	125986431	126039276	rs1268123:126343258:C:T	126022112	126022112	0	6.99e-06	-0.426161	0.0935786	1096492	Distal non-eGene
ENSG00000198945	L3MBTL3	chr6	130013700	130141451	exm-rs6569648	130027974	130027974	0	6.22e-15	-0.698423	0.086118	-317749	Distal non-eGene
ENSG00000118507	AKAP7	chr6	131135667	131283535	rs58646840:131261464:C:T	130940324	130940324	0	3.21e-15	1.63423	0.199212	122998	Distal non-eGene
ENSG00000112306	RPS12	chr6	132814442	132817564	rs7452703:133140073:G:A	132818934	132818934	0	6.16e-14	-8.25637	1.06109	421664	Distal non-eGene
ENSG00000028839	TBPL1	chr6	133952171	133990432	rs4895398:134539024:T:G	134217886	134217886	1	3.61e-06	0.477488	0.101632	441950	Distal non-eGene
ENSG00000237499	RP11-356I2.4	chr6	137823674	137868233	rs10499198:138266431:C:T	137945294	137945294	0	1.1e-28	-2.10532	0.174963	-77061	Distal eGene
ENSG00000270638	RP3-466P17.1	chr6	145735571	145737218	rs146513776:146191395:AT:A	145870259	145870260	0	7.91e-07	0.202731	0.0404099	728706	Distal non-eGene
ENSG00000233452	STXBP5-AS1	chr6	146841902	147204614	rs57555676:147182798:T:TAC	146861662	146861662	0	1.86e-11	0.965285	0.13961	342763	Distal non-eGene
ENSG00000120254	MTHFD1L	chr6	150865550	151101887	rs11755145:151207249:G:A	150886113	150886113	0	1.88e-06	0.602888	0.124634	353886	Distal non-eGene
ENSG00000155906	RMND1	chr6	151404764	151452181	rs113396728:151770136:T:C	151449001	151449001	0	1.92e-12	1.32559	0.182385	3180	Distal eGene
ENSG00000271551	RP11-230C9.2	chr6	156776361	156778422	rs9397968	156792483	156792483	0	1.2e-07	-0.694847	0.1289	-15109	Distal non-eGene
ENSG00000122335	SERAC1	chr6	158109516	158168270	rs1019682:158615926:A:T	158194894	158194894	1	6.25e-07	0.381044	0.0752361	341542	Distal non-eGene
ENSG00000122335	SERAC1	chr6	158109516	158168270	rs599345:158619409:G:A	158198377	158198377	0	3e-07	0.407012	0.0780992	338059	Distal non-eGene
ENSG00000272047	GTF2H5	chr6	158168353	158199344	rs643857:158624945:G:A	158203913	158203913	1	4.52e-07	-0.374274	0.0729589	332523	Distal non-eGene
ENSG00000164674	SYTL3	chr6	158650015	158764876	rs28722961:159071479:G:A	158650447	158650447	0	1.26e-08	0.223452	0.0384503	-482095	Distal non-eGene
ENSG00000130363	RSPH3	chr6	158972872	159000187	rs138864010:159416910:C:T	158995878	158995878	1	4.12e-09	-1.42976	0.237819	-345864	Distal non-eGene
ENSG00000237927	RP3-393E18.2	chr6	159586956	159589169	rs2758330:160104844:G:T	159683812	159683812	0	1.02e-16	-0.239856	0.027641	-513805	Distal non-eGene
ENSG00000120437	ACAT2	chr6	159760329	159779055	rs71756873:160146510:C:CA	159725478	159725478	0	1.71e-07	2.60121	0.488749	37051	Distal non-eGene
ENSG00000146457	WTAP	chr6	159725586	159756319	rs193058938:160182796:G:C	159761764	159761764	1	1.49e-10	1.7111	0.260107	765	Promoter non-eGene
ENSG00000112110	MRPL18	chr6	159789813	159798436	rs58504486:160211645:GGTT:G	159790613	159790616	0	2.51e-13	-1.46764	0.19376	-28084	Distal non-eGene
ENSG00000213066	FGFR1OP	chr6	166999183	167052713	rs7749278:167435325:T:C	167021837	167021837	0	1.13e-18	3.10231	0.334552	-22655	Distal eGene
ENSG00000280057	RP1-168L15.6	chr6	166388137	166389920	rs944654:167647068:G:A	167233580	167233580	0	1.02e-05	0.196302	0.0439094	593342	Distal non-eGene
ENSG00000130023	ERMARD	chr6	169751623	169781584	rs3807064:170119291:A:G	169719195	169719195	0	5.76e-07	0.883823	0.173937	-17147	Distal non-eGene
ENSG00000230487	PSMG3-AS1	chr7	1570074	1589626	rs4518570:1629376:T:C	1589740	1589740	0	6.18e-09	-0.692263	0.116541	643503	Distal non-eGene
ENSG00000122687	MRM2	chr7	2234232	2242198	rs59235082:2273614:G:GA	2233979	2233979	0	3.61e-27	0.733211	0.0630017	-663906	Distal non-eGene
ENSG00000122674	CCZ1	chr7	5898726	5926550	rs10235277:6036245:C:T	5996614	5996614	2	3.2e-07	0.456978	0.0878942	352367	Distal non-eGene
ENSG00000164654	MIOS	chr7	7566873	7608929	rs6966277:7627432:G:A	7587801	7587801	0	2.47e-33	-3.66509	0.277419	674886	Distal non-eGene
ENSG00000233264	AC006042.8	chr7	7980313	7982228	rs12531825:8005174:G:A	7965543	7965543	0	6.93e-06	-0.241925	0.0531013	-246936	Distal non-eGene
ENSG00000006747	SCIN	chr7	12570578	12660179	rs2074866	12640829	12640829	1	9.73e-10	-0.448855	0.0716661	460562	Distal non-eGene
ENSG00000105849	TWISTNB	chr7	19695463	19709087	rs10266162:19760985:A:G	19721362	19721362	0	3.15e-22	0.841023	0.081655	496042	Distal non-eGene
ENSG00000122548	KIAA0087	chr7	26533122	26538788	rs1229669:26442474:A:T	26402854	26402854	1	3.49e-05	0.294657	0.0703878	-4261	Distal non-eGene
ENSG00000122565	CBX3	chr7	26201163	26213356	rs12674232:26449731:G:C	26410111	26410111	0	2.27e-05	11.6535	2.71851	-11518	Distal non-eGene
ENSG00000280255	RP5-1007F24.1	chr7	26538379	26541048	rs28452921:26539777:G:A	26500157	26500157	2	2.06e-05	1.12408	0.260824	-123456	Distal non-eGene
ENSG00000280255	RP5-1007F24.1	chr7	26538379	26541048	rs10264484:26541021:C:G	26501401	26501401	0	2.15e-13	0.610615	0.0803661	-124700	Distal non-eGene
ENSG00000272568	CTB-113D17.1	chr7	28979968	29013367	rs6968194:28994996:G:A	28955380	28955380	1	2.85e-11	-0.565553	0.0826033	240071	Distal non-eGene
ENSG00000086289	EPDR1	chr7	37683844	37951941	rs141157453:37229645:C:CA	37190040	37190040	2	3.28e-05	0.420233	0.100041	-800234	Distal non-eGene
ENSG00000188185	LINC00265	chr7	39733633	39793092	rs12531635:39627098:A:G	39587499	39587499	0	9.03e-09	-0.730744	0.124439	146133	Distal eGene
ENSG00000136279	DBNL	chr7	44044641	44069456	rs59505066:44108863:A:T	44069264	44069264	1	4.34e-06	0.334849	0.0718823	421616	Distal non-eGene
ENSG00000106636	YKT6	chr7	44200969	44214294	rs77888691:44231570:T:G	44191971	44191971	0	3.12e-07	2.37134	0.455691	6199	Distal non-eGene
ENSG00000058404	CAMK2B	chr7	44217151	44334577	rs62459094:44263869:C:A	44224270	44224270	0	2.53e-05	-3.8078	0.893552	266610	Distal non-eGene
ENSG00000136205	TNS3	chr7	47275155	47582558	rs143203031:46390116:G:A	46350518	46350518	0	1.82e-06	13.02	2.68805	-462161	Distal non-eGene
ENSG00000132436	FIGNL1	chr7	50444129	50542535	rs4947641:50489038:C:T	50421340	50421340	0	3.94e-50	0.93969	0.0545804	-217022	Distal non-eGene
ENSG00000106078	COBL	chr7	51016213	51316818	rs12719037:51208953:T:C	51141256	51141256	0	1.56e-16	7.02305	0.814673	-1019927	Distal non-eGene
ENSG00000152926	ZNF117	chr7	64971777	65006684	rs77455903:64411919:T:A	64951541	64951541	0	7.07e-18	-1.34938	0.149366	317833	Distal non-eGene
ENSG00000071462	WBSCR22	chr7	73683026	73705161	rs4717101:73104221:G:A	73689891	73689891	0	2.83e-10	1.70111	0.262861	29781	Distal non-eGene
ENSG00000091073	DTX2	chr7	76461677	76505995	rs77651535:75903444:C:T	76274126	76274126	0	7.52e-06	0.488771	0.107707	-100393	Distal non-eGene
ENSG00000075213	SEMA3A	chr7	83955778	84492724	rs797818:83616059:G:A	83986743	83986743	0	8.19e-15	-0.583582	0.072304	1200112	Distal non-eGene
ENSG00000005469	CROT	chr7	87345682	87399795	rs71784610:86994928:TTTTG:T	87365612	87365616	0	9.4e-05	9.97922	2.5293	-20097	Distal non-eGene
ENSG00000075142	SRI	chr7	88205119	88226993	rs77370806:87869448:GT:G	88240133	88240134	0	5.15e-34	-4.41243	0.329774	1971502	Distal non-eGene
ENSG00000157224	CLDN12	chr7	90383722	90513402	rs56119843:90087902:G:GT	90458588	90458588	0	7.26e-07	2.88025	0.572113	7836	Distal non-eGene
ENSG00000157259	GATAD1	chr7	92447454	92458836	rs7777732:92068523:C:T	92439209	92439209	0	2.84e-21	-0.982356	0.097943	-558489	Distal non-eGene
ENSG00000127995	CASD1	chr7	94509220	94557019	rs2301645:94139580:G:T	94510268	94510268	0	7.88e-11	-4.20823	0.629732	145941	Distal non-eGene
ENSG00000070669	ASNS	chr7	97852119	97872542	rs11981279:97464491:A:T	97835179	97835179	0	1.55e-08	-3.49854	0.60582	-718589	Distal non-eGene
ENSG00000196652	ZKSCAN5	chr7	99504652	99534700	rs71992480:98921086:C:CA	99323463	99323463	0	7e-05	1.15773	0.28811	-310298	Distal non-eGene
ENSG00000160862	AZGP1	chr7	99966721	99976157	rs148475353:99511293:C:CAAAT	99913670	99913670	0	3.38e-10	0.882543	0.136995	78727	Distal non-eGene
ENSG00000166529	ZSCAN21	chr7	100049775	100065038	rs3807479:99716901:C:G	100119278	100119278	0	1.62e-19	-0.929528	0.0976108	-17338	Distal non-eGene
ENSG00000146830	GIGYF1	chr7	100679508	100689448	rs140543556:100307493:AAAAAG:A	100709870	100709875	1	2.95e-05	-0.356376	0.0843314	-97768	Distal non-eGene
ENSG00000077080	ACTL6B	chr7	100643098	100656461	rs117135790:100322834:G:A	100725211	100725211	0	4.18e-40	3.61135	0.243016	527105	Distal non-eGene
ENSG00000214253	FIS1	chr7	101239459	101252316	rs6967483:100868126:C:G	101224845	101224845	0	3.57e-15	-2.51447	0.307078	27471	Distal eGene
ENSG00000106404	CLDN15	chr7	101232093	101238820	rs6967483:100868126:C:G	101224845	101224845	0	1.17e-22	1.28667	0.123481	27471	Distal non-eGene
ENSG00000106404	CLDN15	chr7	101232093	101238820	rs56203098:100886307:G:T	101243026	101243026	1	3.04e-06	1.05481	0.222749	-25358	Distal non-eGene
ENSG00000106400	ZNHIT1	chr7	101217669	101224190	rs79140247:100892521:G:C	101249240	101249240	0	1.48e-18	-1.41593	0.153265	-30820	Distal non-eGene
ENSG00000239521	GATS	chr7	100200654	100272218	rs149896269:100893424:C:T	101250143	101250143	2	1.26e-05	-0.831246	0.187949	-95746	Distal non-eGene
ENSG00000257923	CUX1	chr7	101815905	102283957	rs803070:101926228:T:C	102282936	102282936	0	4.04e-11	3.05434	0.449784	-920116	Distal non-eGene
ENSG00000164815	ORC5	chr7	104126342	104208047	rs10238218	104203749	104203749	0	2.36e-11	1.0558	0.153528	124907	Distal non-eGene
ENSG00000187416	LHFPL3	chr7	104328657	104907232	rs62487986:103885583:T:C	104245135	104245135	0	4.4e-05	1.40719	0.340651	83521	Distal eGene
ENSG00000226869	LHFPL3-AS1	chr7	104738598	104804107	7:104458834:TA:T	104818387	104818388	0	8.62e-06	0.315628	0.0700238	-489731	Distal non-eGene
ENSG00000105879	CBLL1	chr7	107743698	107761667	rs35546358:107538019:CT:C	107897574	107897575	0	2.25e-13	-1.65101	0.217508	-728613	Distal non-eGene
ENSG00000006652	IFRD1	chr7	112422969	112481017	rs2708610:112101653:A:G	112461598	112461598	0	3.78e-12	2.33833	0.326395	-255187	Distal non-eGene
ENSG00000279288	RP11-736E3.3	chr7	113075125	113077181	rs3128384:112122227:C:T	112482172	112482172	1	4.35e-05	-0.28796	0.0696617	-275761	Distal non-eGene
ENSG00000135269	TES	chr7	116210494	116258783	rs55797376:115902705:C:A	116262651	116262651	0	4.01e-08	1.69316	0.302414	262134	Distal non-eGene
ENSG00000105971	CAV2	chr7	116287381	116508541	rs917664:116167444:A:T	116527390	116527390	0	9.79e-06	-2.242	0.500552	-316897	Distal non-eGene
ENSG00000105976	MET	chr7	116672391	116798386	rs78112384:116237096:A:G	116597042	116597042	0	2.86e-05	3.50184	0.827322	-269146	Distal non-eGene
ENSG00000008311	AASS	chr7	122075648	122144280	rs3213699:121725961:A:G	122085907	122085907	0	2.86e-09	-1.8468	0.303942	800852	Distal non-eGene
ENSG00000106348	IMPDH1	chr7	128392278	128410252	rs144398561:128048075:A:AT	128408021	128408021	0	2.36e-12	-0.894262	0.123571	47819	Distal non-eGene
ENSG00000128591	FLNC	chr7	128830378	128859274	rs184369780:128113590:G:A	128473536	128473536	0	9.25e-07	2.57881	0.517349	437183	Distal non-eGene
ENSG00000273329	RP11-448A19.1	chr7	129604549	129611630	rs13225629:129320602:G:A	129680762	129680762	0	2.52e-19	-0.768546	0.0811853	-69048	Distal non-eGene
ENSG00000226380	MIR29A	chr7	130876748	130913310	7:130574050:C:CTTTTTTTT	130889291	130889291	0	1.83e-07	0.521134	0.0981644	220885	Distal non-eGene
ENSG00000273489	RP11-180C16.1	chr7	131493965	131497694	rs112350050:131197667:C:T	131512908	131512908	1	2.2e-05	-0.525302	0.122327	45309	Distal non-eGene
ENSG00000243317	C7orf73	chr7	135662497	135693418	rs61740269:135333172:C:T	135648424	135648424	1	1.09e-05	-0.825058	0.185227	-330672	Distal non-eGene
ENSG00000122778	KIAA1549	chr7	138831382	138981318	rs540649:138639832:C:A	138955086	138955086	1	2.09e-11	-0.548816	0.0795807	26232	Distal eGene
ENSG00000122778	KIAA1549	chr7	138831382	138981318	rs6977460	138983042	138983042	2	2.56e-07	-0.410763	0.0783435	-1724	Promoter eGene
ENSG00000006459	KDM7A	chr7	140084747	140177035	rs62491455:139884629:C:T	140184829	140184829	1	1.05e-06	0.589268	0.118852	219604	Distal non-eGene
ENSG00000225932	CTAGE4	chr7	144183467	144186053	rs117060634:143432552:G:A	143735459	143735459	0	1.3e-14	1.26255	0.157709	374124	Distal non-eGene
ENSG00000244479	OR2A1-AS1	chr7	144251265	144356181	rs35404440:143819505:C:CAA	144122412	144122412	0	8.57e-16	0.584626	0.0697046	-501462	Distal non-eGene
ENSG00000243896	OR2A7	chr7	144258608	144259722	rs35404440:143819505:C:CAA	144122412	144122412	1	2.72e-11	0.49005	0.0714996	-501462	Distal non-eGene
ENSG00000244693	CTAGE8	chr7	144266702	144269288	rs1731353	144173329	144173329	0	2.11e-08	-0.691271	0.120901	261985	Distal non-eGene
ENSG00000213214	ARHGEF35	chr7	144186084	144195655	rs62483066:144109883:G:C	144412790	144412790	2	1.93e-05	0.301953	0.0698208	-2563	Distal non-eGene
ENSG00000204959	ARHGEF34P	chr7	144272446	144286966	rs4725650:144110595:C:T	144413502	144413502	2	5.8e-07	0.348516	0.0686059	-3275	Distal non-eGene
ENSG00000106479	ZNF862	chr7	149838368	149867479	exm670180	149827824	149827824	0	2.29e-05	-2.30371	0.53755	-113043	Distal non-eGene
ENSG00000273011	RP11-728K20.3	chr7	149890740	149891416	rs10807974:149575004:C:A	149877915	149877915	1	3.39e-07	0.377664	0.0727983	-39548	Distal non-eGene
ENSG00000279536	RP11-445N20.2	chr7	149881478	149882105	rs6966785:149575504:T:C	149878415	149878415	0	8.17e-11	0.160642	0.0240606	-40048	Distal non-eGene
ENSG00000127399	LRRC61	chr7	150322640	150338150	rs3735167:150039555:C:T	150342466	150342466	0	4.27e-16	0.566397	0.0667658	30124	Distal non-eGene
ENSG00000082014	SMARCD3	chr7	151238765	151277896	7:151010885:T:TTGG	151313799	151313799	0	1.64e-05	1.11383	0.255329	27900	Distal non-eGene
ENSG00000261455	LINC01003	chr7	152463787	152465549	rs10254368:152161975:T:C	152464890	152464890	0	3.69e-10	-0.498511	0.0775586	-28885	Distal non-eGene
ENSG00000196584	XRCC2	chr7	152644780	152676165	rs3218384:152373252:C:G	152676167	152676167	0	1.23e-90	1.79587	0.0674757	-240162	Distal non-eGene
ENSG00000130226	DPP6	chr7	153887098	154894285	rs10264749:154769658:G:A	154977948	154977948	1	3.65e-06	0.345021	0.0734751	666503	Distal non-eGene
ENSG00000146910	CNPY1	chr7	155474207	155555450	rs1863039:155326585:T:C	155533890	155533890	0	2.01e-21	0.482841	0.0479362	-151814	Distal non-eGene
ENSG00000183638	RP1L1	chr8	10606350	10712187	rs4841407	10658675	10658675	0	7.3e-21	-28.6267	2.88777	181172	Distal non-eGene
ENSG00000254093	PINX1	chr8	10764964	10839884	rs4841408:10516336:A:G	10658826	10658826	0	1.12e-09	0.558216	0.0894787	181021	Distal non-eGene
ENSG00000184608	FAM167A-AS1	chr8	11368403	11438658	rs7816601:11205593:T:C	11348084	11348084	0	2.66e-43	-0.616335	0.0394579	-63668	Distal non-eGene
ENSG00000255495	AC145124.2	chr8	12194468	12196280	rs2467519:11399011:T:C	11541502	11541502	1	6.59e-09	-0.458991	0.0774177	-173100	Distal non-eGene
ENSG00000251468	RP11-369K16.1	chr8	12958388	12962200	rs7830329:12834768:T:G	12977259	12977259	0	7.77e-29	0.7706	0.0638335	-31617	Distal non-eGene
ENSG00000249258	RP11-468H14.2	chr8	17131182	17149789	rs2517041:16975204:G:A	17117695	17117695	0	3.62e-07	-0.151629	0.0293038	-202651	Distal non-eGene
ENSG00000003989	SLC7A2	chr8	17497089	17570573	rs2588228:17390525:T:G	17533016	17533016	0	4.46e-14	0.569418	0.0727401	-119488	Distal non-eGene
ENSG00000104213	PDGFRL	chr8	17576434	17644071	rs10109530:17465603:T:G	17608094	17608094	0	3.17e-48	0.613117	0.0365516	193251	Distal non-eGene
ENSG00000129422	MTUS1	chr8	17643796	17800917	rs140018758:17561137:C:CA	17703628	17703628	1	2.1e-08	0.448087	0.0783498	-127195	Distal non-eGene
ENSG00000156011	PSD3	chr8	18527302	19084730	rs7002540:18870349:G:A	19012839	19012839	0	3.31e-11	9.34376	1.36951	300778	Distal non-eGene
ENSG00000168495	POLR3D	chr8	22245105	22254600	rs71513872:22097835:C:T	22240322	22240322	0	6.21e-13	0.889683	0.119593	337957	Distal non-eGene
ENSG00000120910	PPP3CC	chr8	22440820	22541142	rs60918318:22296988:CT:C	22439475	22439476	0	1.59e-22	-5.25804	0.506436	105511	Distal non-eGene
ENSG00000120896	SORBS3	chr8	22544987	22575788	rs1116085	22537407	22537407	0	6.97e-08	-0.37417	0.0680951	-96588	Distal non-eGene
ENSG00000120896	SORBS3	chr8	22544987	22575788	rs55893847:22428751:C:G	22571238	22571238	1	5.45e-09	-0.529233	0.0887584	-203989	Distal non-eGene
ENSG00000253200	RP11-582J16.5	chr8	22613909	22616657	rs6558173:22492103:G:T	22634590	22634590	0	1.38e-05	-0.818111	0.185889	365410	Distal non-eGene
ENSG00000158941	CCAR2	chr8	22604633	22621514	rs4872531:22529695:A:G	22672182	22672182	0	5.28e-13	-2.4079	0.322618	327818	Distal non-eGene
ENSG00000134020	PEBP4	chr8	22713252	23000000	rs73218763:22785047:C:T	22927534	22927534	0	5.81e-32	-0.924282	0.0718262	-322902	Distal non-eGene
ENSG00000104228	TRIM35	chr8	27284888	27311319	rs73241449:27176815:G:C	27319298	27319298	0	3.86e-23	1.90301	0.180323	295733	Distal non-eGene
ENSG00000120903	CHRNA2	chr8	27459762	27479883	rs139680977:27326838:AGG:A	27469321	27469323	0	2.37e-09	1.77098	0.289898	90953	Distal non-eGene
ENSG00000120885	CLU	chr8	27596918	27615031	exm-rs1532278	27608798	27608798	0	1.3e-13	-142.281	18.5447	-128915	Distal non-eGene
ENSG00000104290	FZD3	chr8	28494206	28574268	rs12056764:28450156:G:T	28592639	28592639	0	1.14e-05	6.42378	1.44507	-98434	Distal eGene
ENSG00000272375	RP11-51J9.6	chr8	30197405	30198048	rs66737526:30025096:T:C	30167580	30167580	0	7.26e-06	0.155508	0.0342103	216899	Distal non-eGene
ENSG00000165392	WRN	chr8	31033802	31173769	rs73235700:31500420:G:A	31642904	31642904	0	1.47e-05	0.463995	0.10575	-3518	Distal non-eGene
ENSG00000272338	RP11-722E23.2	chr8	33360840	33361415	rs138914174:33287513:CA:C	33429995	33429996	0	4.7e-08	-0.233587	0.041943	-1790609	Distal non-eGene
ENSG00000158669	GPAT4	chr8	41577188	41625001	rs71546397:41401221:CT:C	41543702	41543703	0	3.74e-06	-0.548031	0.116839	33485	Distal eGene
ENSG00000104365	IKBKB	chr8	42271303	42332653	rs72641449:42026865:G:A	42169347	42169347	1	1.39e-06	1.0713	0.218578	101955	Distal eGene
ENSG00000137547	MRPL15	chr8	54135211	54147901	rs60281426:54921221:TA:T	54008661	54008662	0	1.48e-05	1.32989	0.303258	-1070230	Distal non-eGene
ENSG00000104442	ARMC1	chr8	65602457	65634217	rs60031291:66477895:AG:A	65565660	65565661	0	2.23e-09	1.14334	0.186815	-994328	Distal non-eGene
ENSG00000169085	C8orf46	chr8	66460004	66518524	rs2555587:67368132:T:A	66455897	66455897	0	5.01e-20	-1.02317	0.10579	158350	Distal non-eGene
ENSG00000164683	HEY1	chr8	79764011	79767863	rs34908025:80940829:T:C	80028594	80028594	0	8.01e-06	-1.86396	0.41202	-260731	Distal eGene
ENSG00000104231	ZFAND1	chr8	81701335	81732903	rs958959:82540150:C:A	81627915	81627915	0	8.25e-11	-1.09745	0.164411	-373045	Distal non-eGene
ENSG00000164879	CA3	chr8	85373437	85449040	rs931505:86348243:A:G	85436014	85436014	0	1.87e-17	-0.576832	0.0647748	551309	Distal non-eGene
ENSG00000147614	ATP6V0D2	chr8	85987324	86154228	rs10096162:87031502:C:G	86019273	86019273	0	3.89e-05	-0.294998	0.0709097	-645837	Distal non-eGene
ENSG00000147613	PSKH2	chr8	86048374	86088621	rs285402:87041727:T:C	86029498	86029498	0	4.41e-07	0.412523	0.0803356	-565646	Distal non-eGene
ENSG00000123124	WWP1	chr8	86342739	86478420	rs10675615:87299888:C:CAT	86287659	86287659	0	7.29e-05	-2.01937	0.503782	-914223	Distal non-eGene
ENSG00000164944	KIAA1429	chr8	94487694	94553529	rs10111287:95578426:C:T	94566198	94566198	0	1.29e-16	-2.63298	0.304536	147614	Distal non-eGene
ENSG00000175895	PLEKHF2	chr8	95133805	95156684	rs145057604:96150785:C:CTTTT	95138557	95138557	0	1.45e-06	-2.00638	0.410182	65899	Distal non-eGene
ENSG00000164924	YWHAZ	chr8	100916526	100953388	rs3100052:101967139:A:G	100954911	100954911	0	8.31e-76	-36.5819	1.58172	-232102	Distal non-eGene
ENSG00000048392	RRM2B	chr8	102204503	102239118	rs113664034:103202627:GTGGAAGTTC:G	102190399	102190408	0	5.93e-10	-0.929046	0.146363	-852903	Distal non-eGene
ENSG00000246263	UBR5-AS1	chr8	102239395	102253333	rs1265147:103210971:T:C	102198743	102198743	1	3.98e-05	-0.540874	0.130168	-861247	Distal non-eGene
ENSG00000172167	MTBP	chr8	120445401	120542133	rs13272518	120462868	120462868	0	1.29e-05	-0.508502	0.11512	450197	Distal non-eGene
ENSG00000176853	FAM91A1	chr8	123768457	123815452	rs7840837:124706629:G:A	123694389	123694389	0	7.95e-14	-4.67342	0.603487	-153183	Distal non-eGene
ENSG00000259820	AC083843.1	chr8	134792021	134798272	rs737196	134835199	134835199	0	1.78e-22	-7.72484	0.745025	-122150	Distal non-eGene
ENSG00000167632	TRAPPC9	chr8	139730344	140458579	rs2948175:141478999:T:C	140468900	140468900	0	9.93e-07	1.37859	0.277379	166719	Distal non-eGene
ENSG00000169398	PTK2	chr8	140657901	141002216	rs7010459:141831241:T:C	140821142	140821142	0	2e-29	-6.81932	0.557876	296136	Distal non-eGene
ENSG00000253716	MINCR	chr8	143280162	143281690	rs7387168:144365148:A:G	143282978	143282978	0	1.21e-50	-0.848586	0.048951	-35868	Distal non-eGene
ENSG00000178685	PARP10	chr8	143977154	144012772	8:145069127:A:AGGG	143994959	143994959	0	1.11e-08	-1.43012	0.245079	113165	Distal non-eGene
ENSG00000161016	RPL8	chr8	144789766	144792587	rs3808374:146018780:C:G	144793395	144793395	0	1.35e-08	-7.67375	1.32324	-275403	Distal non-eGene
ENSG00000120162	MOB3B	chr9	27325210	27529781	rs11788796:27333527:T:A	27333529	27333529	0	2.43e-07	-2.55203	0.485808	196252	Distal eGene
ENSG00000147894	C9orf72	chr9	27546546	27573866	rs10967973:27525751:A:G	27525753	27525753	0	2.31e-18	-6.23513	0.679143	4028	Distal non-eGene
ENSG00000122756	CNTFR	chr9	34551433	34590140	rs71891438:34601869:AGAG:A	34601872	34601875	0	6.91e-05	1.04525	0.259918	-11732	Distal eGene
ENSG00000137070	IL11RA	chr9	34650703	34661892	rs2070074:34649442:A:G	34649445	34649445	0	1.55e-16	4.29873	0.498587	1257	Promoter eGene
ENSG00000261215	RP11-195F19.30	chr9	34661904	34666029	rs913836:34664672:C:T	34664675	34664675	0	1.17e-08	-0.2744	0.0471	-26542	Distal non-eGene
ENSG00000198853	RUSC2	chr9	35490128	35561898	rs12338773	35559908	35559908	0	1.78e-05	1.41587	0.325994	-443567	Distal non-eGene
ENSG00000137101	CD72	chr9	35609534	35646810	rs146706624:35604543:T:C	35604546	35604546	0	2.01e-06	-1.20625	0.25009	-488205	Distal non-eGene
ENSG00000107372	ZFAND5	chr9	72351426	72365235	rs12346492:74651018:C:T	72036102	72036102	0	5.86e-07	46.2661	9.11167	78493	Distal non-eGene
ENSG00000135045	C9orf40	chr9	74946582	74952886	rs10869468:77620513:T:C	75005597	75005597	0	1e-06	-0.623933	0.125576	-117503	Distal non-eGene
ENSG00000106733	NMRK1	chr9	75060574	75088217	rs12686433:77686766:G:A	75071850	75071850	2	2.42e-06	0.546126	0.114168	-183756	Distal non-eGene
ENSG00000148053	NTRK2	chr9	84668552	85027070	rs62561188:87310577:T:C	84695662	84695662	0	3.54e-07	37.3629	7.21428	1046367	Distal non-eGene
ENSG00000130956	HABP4	chr9	96450202	96491336	rs728210:100175478:G:C	97413196	97413196	1	4.77e-05	-0.324156	0.0788417	-537573	Distal non-eGene
ENSG00000165138	ANKS6	chr9	98731330	98796965	exm766424	98770938	98770938	0	2.82e-08	-2.10246	0.371156	-515217	Distal non-eGene
ENSG00000148218	ALAD	chr9	113386318	113401333	rs67609547:116167753:CAA:C	113405473	113405475	0	1.05e-07	0.398215	0.0735155	-129884	Distal non-eGene
ENSG00000078725	BRINP1	chr9	119153459	119369467	rs1886368:122119307:T:A	119357029	119357029	0	1.26e-06	-0.710368	0.144342	-7181621	Distal non-eGene
ENSG00000175764	TTLL11	chr9	121821929	122093606	rs201653732:124855330:G:GTGGCCT	122093051	122093051	0	1.82e-13	0.578172	0.0758533	838449	Distal non-eGene
ENSG00000261534	RP11-244O19.1	chr9	121815675	121819452	rs12338845:124856856:A:T	122094577	122094577	0	6.21e-09	0.679524	0.114409	836923	Distal non-eGene
ENSG00000175287	PHYHD1	chr9	128920896	128942041	rs7048932	128925059	128925059	0	9.69e-24	-4.14374	0.3866	-42565	Distal non-eGene
ENSG00000119383	PTPA	chr9	129110951	129148946	rs55640249:131916421:CAAAAAA:C	129154142	129154148	0	1.38e-13	3.84161	0.501306	421267	Distal non-eGene
ENSG00000165689	SDCCAG3	chr9	136401923	136410609	rs11145808:139522892:G:A	136628440	136628440	1	2.93e-05	0.579856	0.137175	-82578	Distal non-eGene
