# Supplementary material for: QTL mapping of human retina DNA methylation identifies 87 gene-epigenome interactions in age-related macular degeneration
Source: Research Square preprint supplement (doi:10.21203/rs.3.rs-3011096/v1), 2023-06-16
Supplement: Supplementary file 64 [file Supplementary_Table3.xlsx]

## Sheet: eQTLs
Gene_ID	Gene_Symbol	chr	Gene_start	Gene_end	snp	hg38_pos_start	hg38_pos_end	Rank	Backward_nom_pval	Backward_slope	Backward_slope_se
ENSG00000237094	RP4-669L17.10	chr1	365390	501617	rs61768173:762632:T:A	827252	827252	0	4.44e-08	-0.826584	0.148139
ENSG00000237491	RP11-206L10.9	chr1	778771	810060	rs115523412:761958:C:T	826578	826578	0	7.98e-06	2.2668	0.500972
ENSG00000228794	LINC01128	chr1	825139	859446	rs76631953:797281:G:C	861901	861901	0	1.89e-09	2.58855	0.420996
ENSG00000225880	LINC00115	chr1	826207	827522	rs2073814:753474:C:G	818094	818094	0	1.86e-10	-0.352691	0.0539145
ENSG00000223764	RP11-54O7.3	chr1	916866	921016	rs56367715:868928:A:AG	933548	933548	0	1.14e-10	1.19045	0.179763
ENSG00000188976	NOC2L	chr1	944205	959309	rs3748596:888639:T:C	953259	953259	0	2.69e-12	-2.94277	0.407793
ENSG00000187642	PERM1	chr1	975205	982093	exm4548	1759737	1759737	0	7.17e-25	1.59891	0.145014
ENSG00000272512	RP11-54O7.17	chr1	995967	998051	rs9442391:984302:T:C	1048922	1048922	0	1.3e-10	0.562207	0.0851717
ENSG00000188157	AGRN	chr1	1020124	1056118	rs13303157:966307:G:A	1030927	1030927	0	2.95e-06	0.455646	0.096097
ENSG00000188157	AGRN	chr1	1020124	1056118	rs2799073:990806:G:A	1055426	1055426	1	2.89e-06	-0.476332	0.100369
ENSG00000078808	SDF4	chr1	1216909	1232031	rs3818646:1191870:C:T	1256490	1256490	0	3.29e-05	1.89115	0.450281
ENSG00000176022	B3GALT6	chr1	1232266	1235041	rs367679479:1145481:CAA:C	1210101	1210103	0	1.69e-17	-0.940843	0.10549
ENSG00000127054	CPSF3L	chr1	1311586	1324691	rs115464315:1242288:T:G	1306908	1306908	0	7.17e-08	5.47775	0.997907
ENSG00000107404	DVL1	chr1	1335277	1349350	rs6657048:957640:C:T	1022260	1022260	0	4.46e-07	6.00904	1.17073
ENSG00000175756	AURKAIP1	chr1	1373731	1375495	rs12040819:1039185:C:T	1103805	1103805	0	6.65e-07	1.7407	0.344539
ENSG00000242485	MRPL20	chr1	1401909	1407313	rs34442823:1342945:C:A	1407565	1407565	0	5.83e-14	1.87588	0.240835
ENSG00000272455	RP4-758J18.13	chr1	1409097	1410618	rs34817085:1350601:G:T	1415221	1415221	0	1.48e-08	-0.743342	0.128537
ENSG00000235098	ANKRD65	chr1	1418421	1421769	exm3350	1419135	1419135	0	7.85e-21	-0.954287	0.0963532
ENSG00000215915	ATAD3C	chr1	1449690	1470158	rs4590:1375810:C:G	1440430	1440430	1	3.03e-08	-0.522049	0.0923861
ENSG00000160072	ATAD3B	chr1	1471770	1497848	rs9329412:1460291:C:T	1524911	1524911	0	4.31e-15	-5.51518	0.675717
ENSG00000228594	FNDC10	chr1	1598013	1600096	exm4548	1759737	1759737	0	7e-09	0.9009	0.152234
ENSG00000189339	SLC35E2B	chr1	1659530	1692728	rs9442430:1548801:T:C	1613421	1613421	0	7.43e-12	-18.4318	2.61114
ENSG00000268575	RP1-283E3.8	chr1	1702737	1737688	rs36050429:1674026:G:C	1742587	1742587	0	5.32e-30	0.724762	0.0585847
ENSG00000268575	RP1-283E3.8	chr1	1702737	1737688	rs2223485:1653799:C:T	1722360	1722360	1	3.38e-05	-0.538552	0.128419
ENSG00000215790	SLC35E2	chr1	1724839	1745992	rs61776787:1606571:A:G	1675132	1675132	0	1.74e-10	1.00707	0.153697
ENSG00000187730	GABRD	chr1	2019325	2030751	rs3128310:1966453:C:T	2035014	2035014	0	2.13e-05	0.49868	0.115917
ENSG00000182873	RP11-181G12.2	chr1	2181795	2184389	rs61129873:2051228:C:CT	2119789	2119789	0	3.87e-06	-0.173207	0.0369851
ENSG00000162585	FAAP20	chr1	2184462	2212720	rs12082939:2078922:C:T	2147483	2147483	0	3.79e-10	0.658258	0.102487
ENSG00000269896	RP4-740C4.5	chr1	2350415	2352820	rs2843142:2270098:A:G	2338659	2338659	0	7.02e-06	0.30857	0.067773
ENSG00000272420	RP4-740C4.7	chr1	2363062	2363628	rs6682346:2295268:A:T	2363829	2363829	0	1.75e-31	0.44726	0.0350851
ENSG00000157911	PEX10	chr1	2403965	2413797	rs6671420:2338879:G:A	2407440	2407440	0	3.11e-05	0.569263	0.135105
ENSG00000157873	TNFRSF14	chr1	2555640	2565382	rs2281852:2490942:C:A	2559503	2559503	0	3.69e-09	0.95003	0.157512
ENSG00000157870	FAM213B	chr1	2586492	2591469	rs11574001:2496927:G:A	2565488	2565488	0	8.9e-10	-2.8029	0.446446
ENSG00000215912	TTC34	chr1	2635977	2801717	rs6689281:2585965:T:C	2654526	2654526	0	1.62e-16	-0.667757	0.0775082
ENSG00000130762	ARHGEF16	chr1	3454427	3481113	rs6667361:3384231:A:G	3467667	3467667	0	5.28e-33	-2.37049	0.180554
ENSG00000158109	TPRG1L	chr1	3625003	3630127	rs12757620	3623460	3623460	0	1.24e-23	-0.670252	0.0627051
ENSG00000158109	TPRG1L	chr1	3625003	3630127	exm7253	3632268	3632268	1	1.68e-23	-1.42694	0.133946
ENSG00000158109	TPRG1L	chr1	3625003	3630127	rs10910003	3659365	3659365	2	3.47e-05	-0.392284	0.093681
ENSG00000227372	TP73-AS1	chr1	3735602	3747336	rs148748031:3642669:GTGGA:G	3726105	3726109	0	1.02e-06	-1.43706	0.289404
ENSG00000130764	LRRC47	chr1	3778559	3796504	rs1175546:3693909:C:T	3777345	3777345	0	8.48e-09	1.2672	0.215384
ENSG00000116198	CEP104	chr1	3812082	3857214	rs7522227:3748085:A:G	3831521	3831521	0	1.61e-24	-4.86605	0.445176
ENSG00000169598	DFFB	chr1	3857268	3885429	rs45603135:3801141:T:G	3884577	3884577	0	2.92e-21	-0.903889	0.0901495
ENSG00000169598	DFFB	chr1	3857268	3885429	rs34966926:3751728:G:GT	3835164	3835164	1	2.19e-07	0.420251	0.0796812
ENSG00000198912	C1orf174	chr1	3889126	3900293	rs10797357:3821334:G:A	3904770	3904770	0	1.49e-43	1.87233	0.119411
ENSG00000131697	NPHP4	chr1	5862812	5992473	rs371568714:5344485:C:CAA	5284425	5284425	0	2.04e-05	-0.941039	0.218225
ENSG00000069424	KCNAB2	chr1	5991467	6101193	rs116585811:6301301:C:G	6241241	6241241	0	1.28e-06	1.29972	0.264268
ENSG00000069424	KCNAB2	chr1	5991467	6101193	rs71568636:6051981:CCAGGGGG:C	5991921	5991928	1	1.78e-06	0.337718	0.0696555
ENSG00000069424	KCNAB2	chr1	5991467	6101193	rs9434641:6160563:A:G	6100503	6100503	2	1.01e-05	-0.386266	0.0863664
ENSG00000158286	RNF207	chr1	6205476	6221299	exm8994	6219256	6219256	0	3.92e-05	-3.01148	0.724209
ENSG00000116237	ICMT	chr1	6221194	6235972	rs6680884:6268371:G:A	6208311	6208311	0	4.68e-09	-1.22235	0.204076
ENSG00000116237	ICMT	chr1	6221194	6235972	rs115115600:6756674:T:C	6696614	6696614	1	2.37e-06	0.920547	0.192248
ENSG00000158292	GPR153	chr1	6247347	6260975	rs61760840:6320649:G:C	6260589	6260589	0	4.52e-06	0.648503	0.139473
ENSG00000069812	HES2	chr1	6412419	6424670	rs58125749:6453744:C:A	6393684	6393684	0	5.04e-09	0.80442	0.134594
ENSG00000187017	ESPN	chr1	6424789	6461370	rs72633460:6474364:G:A	6414304	6414304	0	5.2e-11	-16.1953	2.39931
ENSG00000007923	DNAJC11	chr1	6634169	6701924	rs56869714:6726450:T:TC	6666390	6666390	0	1.3e-07	1.0796	0.200849
ENSG00000270171	RP11-338N10.1	chr1	7693125	7694844	rs1539181:7761640:T:C	7701580	7701580	0	9.79e-43	0.883639	0.0570591
ENSG00000270171	RP11-338N10.1	chr1	7693125	7694844	rs77721345:7748009:C:T	7687949	7687949	1	1.8e-09	0.886288	0.143948
ENSG00000270171	RP11-338N10.1	chr1	7693125	7694844	rs200670730:7973793:T:TG	7913733	7913733	2	1.01e-05	0.355745	0.0795619
ENSG00000270035	RP11-338N10.2	chr1	7698304	7698872	rs34600274:7762140:CAGG:C	7702080	7702083	0	5.13e-15	-0.825038	0.101389
ENSG00000270035	RP11-338N10.2	chr1	7698304	7698872	rs17368220:7755729:T:C	7695669	7695669	1	3.84e-05	-0.408956	0.098226
ENSG00000270035	RP11-338N10.2	chr1	7698304	7698872	rs9434498:7711758:G:A	7651698	7651698	2	4.81e-05	-0.538932	0.131147
ENSG00000269978	RP11-338N10.3	chr1	7700705	7700970	rs4908680:7757998:T:G	7697938	7697938	0	1.9e-09	1.21568	0.19774
ENSG00000049245	VAMP3	chr1	7771270	7781432	1:7843711:T:C	7783651	7783651	0	1.31e-17	2.42847	0.271261
ENSG00000269925	RP3-467L1.6	chr1	7776384	7776775	rs707455	7765251	7765251	0	7.71e-07	0.107509	0.021408
ENSG00000116288	PARK7	chr1	7954292	7985505	rs7517357:8025275:C:T	7965215	7965215	0	2.5e-17	4.91885	0.554734
ENSG00000142599	RERE	chr1	8352398	8817643	rs70982801:8682838:AT:A	8622779	8622780	0	2.33e-06	5.42792	1.13276
ENSG00000049239	H6PD	chr1	9234776	9271337	rs9435144:9295444:T:C	9235385	9235385	0	2.86e-30	-3.66911	0.294944
ENSG00000171621	SPSB1	chr1	9292881	9369532	rs76884273:9852271:C:A	9792213	9792213	0	1.86e-10	5.52	0.843877
ENSG00000171603	CLSTN1	chr1	9729027	9824526	rs11121497:9902820:A:G	9842762	9842762	0	1.94e-13	-28.4353	3.73536
ENSG00000173614	NMNAT1	chr1	9943429	9985501	rs140532807:9776919:G:A	9716861	9716861	0	3.66e-06	1.70986	0.364138
ENSG00000162444	RBP7	chr1	9997207	10016020	rs34277013:10227032:A:C	10166974	10166974	0	3.01e-06	-0.623243	0.131551
ENSG00000130939	UBE4B	chr1	10032833	10181239	rs11801988:10153153:A:G	10093095	10093095	0	1.41e-06	-4.91084	1.00284
ENSG00000054523	KIF1B	chr1	10210806	10381603	rs71583845:10255824:C:CT	10195766	10195766	0	4.11e-05	23.4845	5.66283
ENSG00000175279	APITD1	chr1	10430444	10442809	rs70997231:10487828:A:AT	10427771	10427771	0	1.2e-07	-0.432374	0.0802034
ENSG00000160049	DFFA	chr1	10456523	10472526	rs11121572:10517273:T:C	10457216	10457216	0	6.63e-09	-1.46943	0.247898
ENSG00000142655	PEX14	chr1	10472289	10630758	rs2506896:10603716:T:C	10543659	10543659	0	2.84e-33	5.51712	0.418085
ENSG00000271895	RP4-635E18.8	chr1	11029660	11030528	rs1967713:11079958:A:G	11019901	11019901	0	1.79e-11	-1.30199	0.188125
ENSG00000171824	EXOSC10	chr1	11066619	11099881	rs2791642:11117536:A:T	11057479	11057479	0	2.78e-09	-4.45375	0.732324
ENSG00000198793	MTOR	chr1	11106536	11262507	rs2744822:11378544:G:T	11318487	11318487	0	8.09e-07	3.55051	0.708366
ENSG00000204624	DISP3	chr1	11479167	11537584	rs3099633:11508140:A:T	11448083	11448083	0	5.22e-73	1.12063	0.0498498
ENSG00000204624	DISP3	chr1	11479167	11537584	rs61776548:12091024:G:A	12030967	12030967	1	2.95e-05	-0.291646	0.0690164
ENSG00000116663	FBXO6	chr1	11664125	11674354	rs3215522:11721833:CCT:C	11661776	11661778	0	4.02e-05	-0.276383	0.066562
ENSG00000116670	MAD2L2	chr1	11674481	11691650	rs3010934:12685681:C:T	12625675	12625675	0	3.06e-05	-0.251235	0.0595783
ENSG00000177000	MTHFR	chr1	11785724	11806920	rs1476413	11792243	11792243	0	4.04e-16	2.42026	0.285048
ENSG00000242349	NPPA-AS1	chr1	11841018	11848079	rs198361:11905633:T:C	11845576	11845576	0	3.57e-27	-1.00589	0.0864226
ENSG00000242349	NPPA-AS1	chr1	11841018	11848079	rs59911871:11830923:G:A	11770866	11770866	1	3.88e-10	-0.524504	0.0817118
ENSG00000162494	LRRC38	chr1	13474978	13514048	rs12036737:13793033:T:G	13466565	13466565	0	1.82e-07	-0.4361	0.0821291
ENSG00000116731	PRDM2	chr1	13700199	13825079	rs1203690:14162023:T:G	13835528	13835528	0	2.22e-05	-1.5724	0.366307
ENSG00000142634	EFHD2	chr1	15409896	15430343	rs115547634:15761915:C:T	15435419	15435419	0	1.35e-05	1.33635	0.303258
ENSG00000132906	CASP9	chr1	15490833	15526534	rs59451051:15856841:C:CA	15530346	15530346	0	8.87e-17	2.21895	0.255137
ENSG00000116138	DNAJC16	chr1	15526814	15592379	rs10927823:15993603:G:A	15667108	15667108	0	6.64e-09	0.429801	0.0725106
ENSG00000116138	DNAJC16	chr1	15526814	15592379	exm19700	15578868	15578868	1	2.56e-05	-1.48895	0.349612
ENSG00000162461	SLC25A34	chr1	15736406	15741396	rs1108185:16064144:A:G	15737649	15737649	0	9.16e-38	-1.09857	0.0768365
ENSG00000179743	FLJ37453	chr1	15834475	15848147	rs145975262:16155230:AAAAAC:A	15828735	15828740	0	4.85e-10	0.628773	0.098531
ENSG00000179743	FLJ37453	chr1	15834475	15848147	rs4661654:16136108:A:G	15809613	15809613	1	2.19e-06	-0.608436	0.126627
ENSG00000173641	HSPB7	chr1	16014029	16019594	rs55751345:16366632:C:G	16040137	16040137	0	1.16e-08	-1.29665	0.222526
ENSG00000186510	CLCNKA	chr1	16018876	16034050	rs1889787:16363132:C:T	16036637	16036637	0	7.31e-15	-1.5459	0.191152
ENSG00000184908	CLCNKB	chr1	16043737	16057308	rs28370336:16154643:C:A	15828148	15828148	0	1.33e-06	0.298224	0.0607403
ENSG00000142632	ARHGEF19	chr1	16197855	16212609	rs2132851:16537752:C:G	16211257	16211257	0	2.26e-07	0.210625	0.0399816
ENSG00000037637	FBXO42	chr1	16246840	16352454	rs35225769:16546514:T:TC	16220019	16220019	0	3.9e-24	-3.87564	0.357985
ENSG00000157191	NECAP2	chr1	16440673	16460078	rs698864:16771474:C:T	16444979	16444979	0	5.73e-13	0.996007	0.133664
ENSG00000226029	RP4-798A10.2	chr1	16460949	16468481	rs12093260:16806925:A:G	16480430	16480430	0	1.4e-07	0.47124	0.08789
ENSG00000226029	RP4-798A10.2	chr1	16460949	16468481	rs279781:16777812:G:C	16451317	16451317	1	8.12e-08	-0.390794	0.0714987
ENSG00000080947	CROCCP3	chr1	16467437	16499257	rs28673857:16854366:C:T	16527871	16527871	0	6.83e-34	-7.50001	0.561807
ENSG00000261135	RP4-798A10.7	chr1	16514646	16515754	1:16909600:A:C	16583105	16583105	0	5.71e-07	1.28279	0.252367
ENSG00000261135	RP4-798A10.7	chr1	16514646	16515754	rs2786825:17013189:A:G	16686694	16686694	1	7.22e-07	0.653066	0.129694
ENSG00000219481	NBPF1	chr1	16562320	16613562	rs11588350:17231788:C:T	16905293	16905293	0	1.59e-14	-0.767377	0.0961995
ENSG00000219481	NBPF1	chr1	16562320	16613562	rs2243658:17031995:G:A	16705500	16705500	1	4.69e-08	0.508719	0.0913403
ENSG00000215908	CROCCP2	chr1	16618970	16644683	rs11584240:17231692:G:A	16905197	16905197	0	2.8e-12	0.586286	0.081309
ENSG00000215908	CROCCP2	chr1	16618970	16644683	rs55667815:17255938:TC:T	16929443	16929444	1	9.69e-06	-0.389099	0.0868284
ENSG00000186301	MST1P2	chr1	16645623	16650289	rs10492988:16826296:C:G	16499801	16499801	0	1.17e-08	0.37774	0.0648391
ENSG00000280114	RP5-875O13.7	chr1	16681098	16688749	rs7545418:17298570:G:A	16972075	16972075	0	1.41e-05	-0.663123	0.150808
ENSG00000280114	RP5-875O13.7	chr1	16681098	16688749	rs1977269	16678355	16678355	1	7.74e-06	-0.346208	0.076401
ENSG00000268869	ESPNP	chr1	16687340	16720157	rs1977269	16678355	16678355	0	1.68e-09	-0.461804	0.0748611
ENSG00000268869	ESPNP	chr1	16687340	16720157	rs2991726:16861562:A:C	16535067	16535067	1	3.98e-06	0.412142	0.0881112
ENSG00000058453	CROCC	chr1	16740274	16972979	rs34378727:16955663:C:CA	16629168	16629168	1	1.37e-06	0.404949	0.0825856
ENSG00000186715	MST1L	chr1	16754911	16770237	rs4920605:17315425:G:A	16988930	16988930	0	5.19e-18	-0.588001	0.0647947
ENSG00000186715	MST1L	chr1	16754911	16770237	rs1977269	16678355	16678355	1	5.64e-07	-0.386111	0.0759226
ENSG00000238142	RP11-108M9.4	chr1	16888539	16889649	rs201771886:16984010:G:C	16657515	16657515	0	4.09e-09	-0.486313	0.0808726
ENSG00000238142	RP11-108M9.4	chr1	16888539	16889649	rs11203396:17237828:A:G	16911333	16911333	1	3.68e-10	0.593896	0.0923933
ENSG00000238142	RP11-108M9.4	chr1	16888539	16889649	rs12142843:16887183:G:A	16560688	16560688	2	8.72e-08	0.725694	0.133103
ENSG00000238142	RP11-108M9.4	chr1	16888539	16889649	rs55667815:17255938:TC:T	16929443	16929444	3	3.56e-07	-0.446024	0.086143
ENSG00000117118	SDHB	chr1	17018723	17054170	rs12142244:17350931:G:A	17024436	17024436	0	4.59e-11	1.25136	0.184835
ENSG00000117115	PADI2	chr1	17066762	17119435	rs2746482:17465937:A:G	17139442	17139442	0	4.2e-46	-43.4161	2.66707
ENSG00000142623	PADI1	chr1	17205127	17246005	rs3003414:17566608:A:C	17240113	17240113	0	2.73e-12	0.481553	0.0667481
ENSG00000142623	PADI1	chr1	17205127	17246005	rs2143810:17440854:C:A	17114359	17114359	1	3.05e-05	0.310992	0.0737302
ENSG00000117154	IGSF21	chr1	18107747	18378483	rs12759956:18432831:T:A	18106337	18106337	0	1.35e-17	2.35581	0.26327
ENSG00000272084	RP5-1126H10.2	chr1	19072111	19075511	rs17397875:19530224:G:T	19203730	19203730	0	2.76e-06	0.2467	0.0518761
ENSG00000127481	UBR4	chr1	19074507	19210276	rs140599506:19609522:G:A	19283028	19283028	0	2.97e-05	7.59086	1.7969
ENSG00000127463	EMC1	chr1	19215665	19251552	rs2073104:19564650:C:G	19238156	19238156	0	1.18e-09	-0.502533	0.0806592
ENSG00000127463	EMC1	chr1	19215665	19251552	rs3748757:19491857:T:C	19165363	19165363	1	3.4e-08	-0.386041	0.0685755
ENSG00000053372	MRTO4	chr1	19251540	19260128	rs61764885:19579994:C:T	19253500	19253500	0	2.49e-07	-0.703915	0.134124
ENSG00000211454	AKR7L	chr1	19265983	19274194	rs2103718:19588061:A:G	19261567	19261567	0	2.92e-18	0.540536	0.0590744
ENSG00000053371	AKR7A2	chr1	19303966	19312146	rs2227295:19638309:A:G	19311815	19311815	0	5.69e-06	0.60993	0.132611
ENSG00000040487	PQLC2	chr1	19312327	19329300	rs214313:19648390:G:A	19321896	19321896	0	8.96e-14	0.770722	0.0997503
ENSG00000173436	MINOS1	chr1	19596978	19629821	rs728611:19948507:A:G	19622013	19622013	0	1.88e-06	1.47959	0.305889
ENSG00000158747	NBL1	chr1	19640555	19658456	rs74312769:19917889:C:CA	19591395	19591395	0	2.02e-11	-2.97327	0.430809
ENSG00000169914	OTUD3	chr1	19882514	19912945	rs2315057:20181412:C:T	19854919	19854919	0	4.75e-14	2.13647	0.273249
ENSG00000169914	OTUD3	chr1	19882514	19912945	rs12144022:20176608:C:T	19850115	19850115	1	4.71e-09	1.05344	0.175909
ENSG00000158816	VWA5B1	chr1	20290920	20354894	rs2223225:20620323:C:T	20293830	20293830	0	4.08e-06	0.331746	0.0710097
ENSG00000158816	VWA5B1	chr1	20290920	20354894	rs10737446:20542393:A:G	20215900	20215900	1	2.08e-05	-0.351672	0.0816535
ENSG00000162545	CAMK2N1	chr1	20482392	20486220	rs12566008:20688550:T:C	20362057	20362057	0	6.94e-07	-0.423687	0.0840093
ENSG00000162545	CAMK2N1	chr1	20482392	20486220	rs10737446:20542393:A:G	20215900	20215900	1	7.06e-07	-0.408211	0.0809947
ENSG00000162545	CAMK2N1	chr1	20482392	20486220	rs142895692:21382133:T:G	21055640	21055640	2	3.5e-06	1.19399	0.253773
ENSG00000090432	MUL1	chr1	20499449	20508161	rs3831949:20826782:CCT:C	20500289	20500291	0	4.58e-12	-0.722923	0.101332
ENSG00000158828	PINK1	chr1	20633456	20651511	rs7520498:20949628:C:T	20623135	20623135	0	2.31e-10	3.72992	0.573319
ENSG00000117242	PINK1-AS	chr1	20642658	20652193	rs671312:20976212:C:T	20649719	20649719	0	5.58e-45	1.80569	0.112748
ENSG00000117245	KIF17	chr1	20664015	20718017	rs75792533:20069775:G:T	19743282	19743282	0	3.96e-05	0.462804	0.111363
ENSG00000075151	EIF4G3	chr1	20806293	21176888	rs12125335:21385436:T:C	21058943	21058943	0	5.99e-09	-5.23821	0.881002
ENSG00000142794	NBPF3	chr1	21440129	21485005	rs6426709:21790941:A:G	21464448	21464448	0	1.29e-62	-1.16373	0.0579275
ENSG00000142794	NBPF3	chr1	21440129	21485005	rs12071022:21730363:G:A	21403870	21403870	1	1.29e-06	0.497443	0.101194
ENSG00000162551	ALPL	chr1	21509373	21578412	rs1256344:21874042:C:G	21547549	21547549	0	1.11e-38	1.22114	0.0841096
ENSG00000162551	ALPL	chr1	21509373	21578412	rs12402697:21891861:C:A	21565368	21565368	1	9.71e-07	-0.435064	0.0874553
ENSG00000090686	USP48	chr1	21678299	21783606	rs7519675:22106875:A:G	21780382	21780382	0	9.2e-11	4.57571	0.687337
ENSG00000142798	HSPG2	chr1	21822246	21937297	rs7544500	21945346	21945346	0	8.57e-09	-0.517712	0.0880213
ENSG00000218510	LINC00339	chr1	22024532	22031225	rs2473295	22028373	22028373	0	2.95e-18	-0.652347	0.0713043
ENSG00000218510	LINC00339	chr1	22024532	22031225	rs34108012:22500688:G:A	22174195	22174195	1	4.16e-05	-0.3126	0.0754304
ENSG00000184677	ZBTB40	chr1	22451852	22531157	rs7414984:22136402:A:G	21809909	21809909	0	2.9e-05	-2.18067	0.515495
ENSG00000070886	EPHA8	chr1	22563565	22603594	rs5773011:22901743:CTTATTA:C	22575250	22575256	0	2.25e-42	1.23043	0.0798952
ENSG00000070886	EPHA8	chr1	22563565	22603594	rs682118:22910226:C:A	22583733	22583733	1	1.3e-06	0.662832	0.13487
ENSG00000133216	EPHB2	chr1	22710840	22921500	rs5773024:23151933:CA:C	22825440	22825441	0	1.1e-05	-1.29487	0.290776
ENSG00000169641	LUZP1	chr1	23084024	23177808	rs11581504:23715978:A:G	23389485	23389485	0	1.14e-06	-0.748694	0.151511
ENSG00000169641	LUZP1	chr1	23084024	23177808	rs2235548:23394062:G:A	23067569	23067569	1	3.44e-05	-0.316819	0.0756268
ENSG00000125945	ZNF436	chr1	23359449	23369442	rs754984:23698120:C:G	23371627	23371627	0	8.18e-18	4.79995	0.53245
ENSG00000249087	ZNF436-AS1	chr1	23368998	23371839	rs57254366:23690536:T:TA	23364043	23364043	0	3.2e-18	-1.49951	0.164094
ENSG00000204219	TCEA3	chr1	23381062	23424740	rs36007732:23775548:GTC:G	23449055	23449057	0	1.01e-10	0.467428	0.0703807
ENSG00000204219	TCEA3	chr1	23381062	23424740	rs11298848:23739201:CA:C	23412708	23412709	1	1.08e-07	1.02502	0.189418
ENSG00000204219	TCEA3	chr1	23381062	23424740	rs10917373:23691745:C:T	23365252	23365252	2	2.51e-07	0.426459	0.0812735
ENSG00000088280	ASAP3	chr1	23428564	23484568	rs1555024:23786203:C:T	23459710	23459710	0	3.11e-15	2.04571	0.249236
ENSG00000011009	LYPLA2	chr1	23790971	23795539	rs139482582:24093721:C:T	23767231	23767231	0	6.09e-05	-1.79544	0.443078
ENSG00000117305	HMGCL	chr1	23801886	23838620	rs34398263:24204934:A:AT	23878444	23878444	0	1.42e-09	-0.437048	0.0705127
ENSG00000117305	HMGCL	chr1	23801886	23838620	rs138824565:23673186:T:A	23346693	23346693	1	3.42e-05	0.584956	0.139581
ENSG00000179163	FUCA1	chr1	23845078	23868294	rs140967752:24187738:G:A	23861248	23861248	0	4.36e-09	0.794707	0.132403
ENSG00000189266	PNRC2	chr1	23959110	23963462	rs55899369:24321935:T:G	23995445	23995445	0	1.08e-22	-5.92718	0.568332
ENSG00000225315	RP11-293P20.2	chr1	24040836	24086799	rs75940614:23558464:C:T	23231971	23231971	0	1.74e-06	1.50972	0.311032
ENSG00000225315	RP11-293P20.2	chr1	24040836	24086799	rs11249130:24413618:C:T	24087128	24087128	1	6.8e-06	0.30764	0.0674615
ENSG00000142677	IL22RA1	chr1	24119772	24143121	rs16829225:24470393:C:T	24143903	24143903	0	5.66e-12	-0.624339	0.0879157
ENSG00000142677	IL22RA1	chr1	24119772	24143121	rs60217046:24508689:CAA:C	24182199	24182201	1	2.92e-05	0.308999	0.0730866
ENSG00000185436	IFNLR1	chr1	24154158	24187959	rs12094257:24513608:C:T	24187118	24187118	0	4.15e-22	-0.721162	0.0702472
ENSG00000185436	IFNLR1	chr1	24154158	24187959	rs12064700:24878491:C:T	24552000	24552000	1	6.22e-06	-0.372896	0.0814184
ENSG00000001460	STPG1	chr1	24357000	24416934	rs10708610:24765378:TA:T	24438888	24438889	0	2.07e-10	-0.427032	0.0654595
ENSG00000001460	STPG1	chr1	24357000	24416934	rs11446442:24677898:G:GT	24351408	24351408	1	5.33e-06	0.456257	0.0988929
ENSG00000001461	NIPAL3	chr1	24415795	24472976	rs195730:24799552:G:C	24473062	24473062	0	6.41e-13	4.68444	0.630093
ENSG00000117602	RCAN3	chr1	24502352	24541040	rs195709:24816729:T:C	24490239	24490239	0	3.44e-72	8.87012	0.397923
ENSG00000184454	NCMAP	chr1	24556112	24609328	rs139523965:24881779:AAAT:A	24555288	24555291	0	3.56e-20	0.623478	0.0641775
ENSG00000184454	NCMAP	chr1	24556112	24609328	rs4648999:24914032:A:T	24587541	24587541	1	4.17e-07	-0.351296	0.0682636
ENSG00000133226	SRRM1	chr1	24631717	24673267	rs114645711:24917555:G:C	24591064	24591064	0	6.11e-05	6.63673	1.63798
ENSG00000169504	CLIC4	chr1	24745358	24844324	rs7535819:25173037:T:C	24846546	24846546	0	6.34e-09	11.7141	1.97349
ENSG00000183726	TMEM50A	chr1	25337918	25362361	rs190056379:25621980:C:T	25295489	25295489	0	6.39e-05	1.43313	0.354687
ENSG00000188672	RHCE	chr1	25362250	25430192	rs760938:25715885:C:A	25389394	25389394	0	1.99e-62	0.986508	0.0492107
ENSG00000188672	RHCE	chr1	25362250	25430192	rs34626290:26719231:A:AG	26392740	26392740	1	3.04e-05	-0.567178	0.134444
ENSG00000204178	TMEM57	chr1	25430859	25500209	rs34293609:25797832:CA:C	25471341	25471342	0	9.16e-10	-1.51874	0.242093
ENSG00000228172	RP1-317E23.3	chr1	25816750	25820797	1:26962743:T:A	26636252	26636252	0	4.44e-05	0.167007	0.0404516
ENSG00000117640	MTFR1L	chr1	25818641	25832942	rs2294226:26146449:C:T	25819958	25819958	0	5.97e-50	-8.30908	0.483798
ENSG00000158006	PAFAH2	chr1	25959768	25998157	rs3008244:26344477:G:A	26017986	26017986	0	4.2e-20	-2.55886	0.263963
ENSG00000158008	EXTL1	chr1	26019885	26036464	rs58286202:26339903:G:A	26013412	26013412	0	1.01e-11	0.430114	0.0613434
ENSG00000236782	RP11-96L14.7	chr1	26169517	26171821	rs2783707:26504196:C:G	26177705	26177705	0	1.19e-23	-2.41384	0.225724
ENSG00000142684	ZNF593	chr1	26169872	26170873	rs112923978:26549595:T:TA	26223104	26223104	0	9.3e-07	0.19666	0.0394611
ENSG00000142675	CNKSR1	chr1	26177404	26189886	rs8768:26497340:A:C	26170849	26170849	0	2.73e-42	1.0405	0.0676497
ENSG00000236155	RP11-231P20.2	chr1	26209742	26229840	rs11247878:26560962:C:T	26234471	26234471	0	8.7e-07	-0.245637	0.0491536
ENSG00000130695	CEP85	chr1	26234154	26279038	rs12410600:26661402:G:C	26334911	26334911	0	3.43e-16	0.92532	0.108695
ENSG00000130695	CEP85	chr1	26234154	26279038	rs374506385:26580918:T:TA	26254427	26254427	1	2.66e-05	0.519835	0.122301
ENSG00000158062	UBXN11	chr1	26281329	26318363	rs7540082:26544642:C:T	26218151	26218151	0	5.32e-06	-2.43879	0.528543
ENSG00000117682	DHDDS	chr1	26432283	26471294	rs1002488:26865922:G:A	26539431	26539431	0	3.22e-08	-3.30673	0.586358
ENSG00000198830	HMGN2	chr1	26472451	26475972	rs9438551	26448732	26448732	0	1.3e-07	-13.1175	2.44008
ENSG00000260063	RP5-968P14.2	chr1	26692133	26694131	rs59479684:27255904:CA:C	26929413	26929414	0	9.66e-06	-0.16273	0.0363077
ENSG00000060642	PIGV	chr1	26787473	26798398	rs34397747:27092322:T:C	26765831	26765831	0	4.58e-11	-1.09159	0.16123
ENSG00000090273	NUDC	chr1	26900239	26946862	rs147947012:27340348:C:G	27013857	27013857	0	3.69e-10	-3.66707	0.570526
ENSG00000142784	WDTC1	chr1	27234517	27308633	rs187958425:27254070:G:A	26927579	26927579	0	9.5e-09	-22.1467	3.77731
ENSG00000186501	TMEM222	chr1	27322146	27336400	rs148168271:27531570:G:A	27205079	27205079	0	5.72e-08	3.76838	0.681192
ENSG00000117748	RPA2	chr1	27891525	27914746	rs17185038:28219658:C:G	27893147	27893147	0	8.12e-30	11.0267	0.894712
ENSG00000158161	EYA3	chr1	27970345	28088696	rs10902684	28050542	28050542	0	8.64e-35	3.70596	0.273068
ENSG00000169403	PTAFR	chr1	28147167	28193936	rs111636511:28560651:G:GGTTTT	28234140	28234140	0	1.69e-05	-0.154698	0.035516
ENSG00000126698	DNAJC8	chr1	28199457	28233025	rs11805172:28581064:A:G	28254553	28254553	0	5.48e-09	-4.57642	0.767659
ENSG00000130770	ATPIF1	chr1	28236110	28246906	rs6691903:28573642:A:G	28247131	28247131	0	1.39e-59	-1.07312	0.0553317
ENSG00000130770	ATPIF1	chr1	28236110	28246906	rs489259:28547077:T:C	28220566	28220566	1	5.03e-08	-0.686946	0.123634
ENSG00000270605	RP5-1092A3.4	chr1	28239510	28241453	rs35874576:28568104:C:CT	28241593	28241593	0	8.81e-110	-1.29098	0.041222
ENSG00000270605	RP5-1092A3.4	chr1	28239510	28241453	1:28856669:CAA:C	28530157	28530159	1	4.88e-06	-0.34567	0.074614
ENSG00000130766	SESN2	chr1	28259528	28282491	rs5002223:27963255:A:T	27636744	27636744	0	1.44e-05	1.4446	0.328891
ENSG00000130772	MED18	chr1	28329003	28335967	rs145850575:29536018:CAG:C	29209506	29209508	0	4.14e-05	0.619412	0.149427
ENSG00000204138	PHACTR4	chr1	28369583	28500369	rs6690915:28682557:C:T	28356046	28356046	0	2.09e-19	-1.53854	0.162118
ENSG00000180098	TRNAU1AP	chr1	28553086	28578545	rs1342086:28905566:G:C	28579054	28579054	0	2.1e-09	-0.795847	0.129818
ENSG00000116329	OPRD1	chr1	28812143	28871267	rs204047:29145124:G:T	28818612	28818612	0	9.58e-12	0.613124	0.0873483
ENSG00000116329	OPRD1	chr1	28812143	28871267	rs2318773:29149899:G:A	28823387	28823387	1	4.7e-05	-0.3564	0.0866054
ENSG00000229447	RP11-490K7.4	chr1	31263246	31263681	rs1970431:31726370:G:T	31253523	31253523	0	9.9e-07	-0.129282	0.0260084
ENSG00000084636	COL16A1	chr1	31652248	31704319	rs6657383:32165059:C:T	31699458	31699458	0	3.13e-20	3.89401	0.400162
ENSG00000084623	EIF3I	chr1	32221929	32231604	rs11801931:32655155:T:G	32189554	32189554	0	1.5e-06	1.897	0.388373
ENSG00000220785	MTMR9LP	chr1	32231659	32241620	rs140924098:32711938:T:TTC	32246337	32246337	0	5.01e-15	0.86231	0.105925
ENSG00000116478	HDAC1	chr1	32292087	32333635	rs77626504:32477783:A:G	32012182	32012182	0	8.25e-05	2.80786	0.705867
ENSG00000225828	FAM229A	chr1	32361271	32364278	rs2273376:32832292:A:G	32366691	32366691	0	7.73e-15	3.1572	0.390775
ENSG00000160058	BSDC1	chr1	32365104	32394731	rs2273376:32832292:A:G	32366691	32366691	0	2.11e-11	7.64503	1.10891
ENSG00000162520	SYNC	chr1	32680361	32703596	1:32760110:CT:C	32294509	32294510	0	4.15e-05	0.435044	0.104954
ENSG00000116497	S100PBP	chr1	32816768	32858879	rs3831935:33318931:TG:T	32853330	32853331	0	4.95e-11	-1.95305	0.289005
ENSG00000160097	FNDC5	chr1	32862269	32872482	rs11576800:33344978:C:T	32879377	32879377	0	2.28e-08	-1.01328	0.177649
ENSG00000121905	HPCA	chr1	32885995	32898441	rs1765223	32791283	32791283	0	2.32e-07	-1.3165	0.250157
ENSG00000116514	RNF19B	chr1	32936446	32964685	rs520309:33398256:T:C	32932655	32932655	0	1.72e-39	-0.904518	0.0614753
ENSG00000116514	RNF19B	chr1	32936446	32964685	1:33043832:AT:A	32578231	32578232	1	7.86e-05	0.504893	0.126542
ENSG00000004455	AK2	chr1	33007941	33080996	1:33456305:CA:C	32990704	32990705	0	4.82e-12	-5.6392	0.791304
ENSG00000116525	TRIM62	chr1	33145403	33182059	rs368589779:33813967:T:C	33348366	33348366	0	1.18e-05	0.803112	0.181005
ENSG00000116525	TRIM62	chr1	33145403	33182059	rs7511823:33994201:G:A	33528601	33528601	1	3.74e-05	0.293989	0.0705058
ENSG00000134686	PHC2	chr1	33323624	33431052	rs77244502:33761211:C:CAG	33295610	33295610	0	1.51e-07	4.2985	0.803995
ENSG00000121903	ZSCAN20	chr1	33472646	33496507	rs2641957:33981018:A:T	33515418	33515418	0	2.5e-07	-0.297377	0.0566671
ENSG00000121904	CSMD2	chr1	33514000	34165842	rs4653352:34283024:A:G	33817423	33817423	0	4.59e-09	0.982822	0.163994
ENSG00000187513	GJA4	chr1	34792999	34795747	1:35730473:C:G	35264872	35264872	0	2.23e-06	0.749485	0.156105
ENSG00000241014	RP11-244H3.1	chr1	34974357	34985313	rs10914960:34950449:A:T	34484848	34484848	0	6.73e-05	0.19956	0.0495441
ENSG00000142687	KIAA0319L	chr1	35433491	35557950	1:36088525:A:C	35622924	35622924	0	1.32e-05	-6.036	1.36825
ENSG00000020129	NCDN	chr1	35557474	35567274	rs6702609:35060339:G:C	34594738	34594738	0	2.56e-05	2.56772	0.602827
ENSG00000116819	TFAP2E	chr1	35573371	35595328	rs76827316:36983367:A:G	36517766	36517766	0	6.01e-05	-2.73582	0.674557
ENSG00000142686	C1orf216	chr1	35713876	35719472	rs146303022:36253717:GAAAAGA:G	35788116	35788122	0	1.12e-16	-5.98	0.690071
ENSG00000092847	AGO1	chr1	35869809	35930528	rs72901297:36184589:C:T	35718988	35718988	0	1.25e-11	4.42552	0.634211
ENSG00000171812	COL8A2	chr1	36095237	36125220	rs4653160	36133946	36133946	0	4.92e-13	0.445551	0.0596108
ENSG00000054116	TRAPPC3	chr1	36136571	36156053	rs79315100:36989003:C:T	36523402	36523402	0	2.89e-05	0.886813	0.209613
ENSG00000054116	TRAPPC3	chr1	36136571	36156053	rs5773520:36633897:G:GA	36168296	36168296	1	2.07e-05	0.335304	0.0778282
ENSG00000054116	TRAPPC3	chr1	36136571	36156053	rs184852223:36331583:G:A	35865982	35865982	2	9.99e-05	-1.21	0.307868
ENSG00000116871	MAP7D1	chr1	36155580	36180849	rs17484585:37086039:C:T	36620438	36620438	0	2.59e-05	-3.36106	0.789718
ENSG00000116883	RP11-268J15.5	chr1	36323735	36329221	rs34474512:36782364:CT:C	36316763	36316764	0	2.46e-08	1.94644	0.342096
ENSG00000181817	LSM10	chr1	36391239	36397892	rs79251590:36863697:T:C	36398096	36398096	0	3.16e-07	0.645771	0.124146
ENSG00000116885	OSCP1	chr1	36415828	36450451	rs146929874:36875763:G:T	36410162	36410162	0	1.18e-28	2.22473	0.185001
ENSG00000233621	LINC01137	chr1	37454880	37474411	rs2811645:37934725:C:T	37469124	37469124	0	1.89e-15	0.980103	0.118403
ENSG00000163875	MEAF6	chr1	37492576	37514774	rs7534923:37998578:C:G	37532977	37532977	0	2.67e-12	1.60421	0.22226
ENSG00000163879	DNALI1	chr1	37556920	37566857	rs7530630:38045274:G:A	37579673	37579673	0	9.75e-59	1.11592	0.0581214
ENSG00000163879	DNALI1	chr1	37556920	37566857	rs36068512:38058597:T:C	37592996	37592996	1	8.71e-20	-1.06308	0.110717
ENSG00000134697	GNL2	chr1	37566817	37595935	rs2294875:38052445:C:T	37586844	37586844	0	2.6e-07	-0.759192	0.144882
ENSG00000116922	C1orf109	chr1	37681571	37692249	rs684260:38148765:A:G	37683093	37683093	0	7.23e-12	0.939635	0.133032
ENSG00000134690	CDCA8	chr1	37692419	37709719	rs2306626:38156343:G:A	37690671	37690671	0	2.25e-11	-0.643473	0.0934688
ENSG00000134690	CDCA8	chr1	37692419	37709719	rs116072013:38175950:C:T	37710278	37710278	1	5.84e-09	0.923334	0.155178
ENSG00000183317	EPHA10	chr1	37713881	37765133	rs535394:38223362:T:A	37757690	37757690	0	4.17e-16	1.65233	0.194703
ENSG00000185090	MANEAL	chr1	37793803	37801137	rs72661817:38238503:T:C	37772831	37772831	0	2.96e-19	-1.27684	0.135171
ENSG00000204084	INPP5B	chr1	37860698	37947057	rs528464:38248588:A:T	37782916	37782916	0	4.91e-35	0.833492	0.0611427
ENSG00000204084	INPP5B	chr1	37860698	37947057	rs112495211:38380913:T:C	37915241	37915241	1	4.7e-08	-1.07387	0.192822
ENSG00000183386	FHL3	chr1	37996771	38005606	rs138394937:38304586:C:T	37838914	37838914	0	3.28e-05	0.420098	0.100011
ENSG00000116954	RRAGC	chr1	38838199	38859823	rs6703810:39345358:T:C	38879686	38879686	0	1.54e-05	-2.08247	0.475753
ENSG00000168653	NDUFS5	chr1	39026319	39034636	rs35524614:39533396:T:TA	39067724	39067724	0	2.26e-24	-4.07023	0.373726
ENSG00000182109	RP11-69E11.4	chr1	39522281	39546187	rs79473113:40020020:C:A	39554348	39554348	0	2.76e-16	-1.79187	0.209743
ENSG00000243970	PPIEL	chr1	39531839	39558707	rs17568616:39682662:A:T	39216990	39216990	0	1.58e-07	-0.366522	0.0686751
ENSG00000090621	PABPC4	chr1	39560817	39576790	rs79473113:40020020:C:A	39554348	39554348	0	5.71e-06	6.81735	1.48242
ENSG00000116983	HPCAL4	chr1	39678649	39691689	rs6690939:40151810:T:G	39686138	39686138	0	8.66e-16	3.75157	0.447366
ENSG00000084072	PPIE	chr1	39692183	39763914	rs12239844:40217258:T:C	39751586	39751586	0	1.36e-78	4.27954	0.179999
ENSG00000043514	TRIT1	chr1	39841023	39883511	rs12123609:40303627:C:T	39837955	39837955	0	2.81e-18	-0.902694	0.0985983
ENSG00000043514	TRIT1	chr1	39841023	39883511	rs230304:40282818:A:G	39817146	39817146	1	2.63e-08	0.448816	0.079059
ENSG00000043514	TRIT1	chr1	39841023	39883511	rs6658277:40211517:C:A	39745845	39745845	2	1.9e-05	0.545861	0.126116
ENSG00000131236	CAP1	chr1	40040234	40072649	rs201693731:40495101:C:A	40029429	40029429	0	3.13e-10	-5.99947	0.92947
ENSG00000131238	PPT1	chr1	40072706	40097703	rs3131656:40548690:G:A	40083018	40083018	0	6.82e-17	-6.35812	0.728113
ENSG00000049089	COL9A2	chr1	40300488	40317816	rs4660399:40775082:T:G	40309410	40309410	0	2.79e-05	-4.78363	1.12859
ENSG00000084070	SMAP2	chr1	40344851	40423326	rs3013457:40861749:G:A	40396077	40396077	0	1.62e-11	-4.21209	0.607272
ENSG00000187815	ZFP69	chr1	40477216	40496343	rs6600338:40939737:A:C	40474065	40474065	0	1.47e-14	-0.577757	0.0723259
ENSG00000187815	ZFP69	chr1	40477216	40496343	rs3013466:40930549:C:A	40464877	40464877	1	2.43e-06	0.370731	0.077509
ENSG00000238287	RP11-656D10.3	chr1	40493158	40508661	rs4660411:40953925:G:A	40488253	40488253	0	2.24e-43	-0.953018	0.0609435
ENSG00000238287	RP11-656D10.3	chr1	40493158	40508661	rs16827394:41032715:A:G	40567043	40567043	1	3.63e-06	0.75267	0.160244
ENSG00000164002	EXO5	chr1	40508742	40516556	rs6699445:40989620:C:T	40523948	40523948	0	1.71e-11	0.606515	0.0875448
ENSG00000164002	EXO5	chr1	40508742	40516556	rs553057:40214375:G:C	39748703	39748703	1	4.18e-05	-0.293255	0.0707799
ENSG00000272145	NFYC-AS1	chr1	40690381	40692066	rs2744798:41169120:T:C	40703448	40703448	0	1.98e-16	-0.87766	0.102195
ENSG00000066136	NFYC	chr1	40691649	40771603	rs6667368:41160559:T:C	40694887	40694887	0	1.06e-21	2.06816	0.203727
ENSG00000117013	KCNQ4	chr1	40784013	40840452	rs60237568:41281059:A:T	40815387	40815387	0	1.11e-07	-0.623775	0.115389
ENSG00000171793	CTPS1	chr1	40979336	41012565	rs12067645	40960192	40960192	0	4.23e-09	0.794408	0.132231
ENSG00000198815	FOXJ3	chr1	42176540	42335877	rs7515066	41611244	41611244	0	6.6e-05	-1.4586	0.361675
ENSG00000066185	ZMYND12	chr1	42430330	42456267	rs199759922:42960668:C:T	42494997	42494997	0	1.24e-22	-1.04058	0.0999305
ENSG00000186409	CCDC30	chr1	42463331	42654664	rs199759922:42960668:C:T	42494997	42494997	0	2.46e-09	0.682328	0.111807
ENSG00000065978	YBX1	chr1	42682428	42702349	rs61777383:42985838:T:C	42520167	42520167	0	2.36e-06	-14.1821	2.96117
ENSG00000164008	C1orf50	chr1	42767270	42775747	rs323713:43279132:C:T	42813461	42813461	0	7.38e-10	-0.426816	0.0676379
ENSG00000177868	SVBP	chr1	42807053	42817252	rs323720	42805362	42805362	0	2.71e-36	1.35862	0.0974602
ENSG00000164010	ERMAP	chr1	42817125	42844989	rs3048759:43268889:C:CAA	42803218	42803218	0	3.03e-09	1.09794	0.180992
ENSG00000164011	ZNF691	chr1	42846574	42852477	rs72678390:43642673:A:G	43177002	43177002	0	5.05e-05	1.17369	0.286426
ENSG00000227533	SLC2A1-AS1	chr1	42959050	42983358	rs17387775	42950462	42950462	0	5.11e-49	1.16496	0.0686954
ENSG00000227533	SLC2A1-AS1	chr1	42959050	42983358	rs859511:43430260:C:T	42964589	42964589	1	4.06e-22	0.820338	0.0798876
ENSG00000227533	SLC2A1-AS1	chr1	42959050	42983358	rs3738516	42974530	42974530	2	2.96e-05	0.364753	0.0863319
ENSG00000066056	TIE1	chr1	43300994	43323108	rs71636607:44075571:T:G	43609900	43609900	0	1.91e-05	0.527327	0.121865
ENSG00000066322	ELOVL1	chr1	43363398	43368074	rs2782652:43926305:T:C	43460634	43460634	0	5.56e-06	0.634723	0.137848
ENSG00000159479	MED8	chr1	43383918	43389808	rs34148772:43820936:C:CT	43355265	43355265	0	1.5e-06	1.99656	0.408744
ENSG00000198198	SZT2	chr1	43389883	43452650	1:43525534:T:C	43059863	43059863	0	7.64e-05	5.33022	1.3336
ENSG00000178922	HYI	chr1	43451004	43453989	rs2782651:43920686:C:G	43455015	43455015	0	6.76e-26	-1.81011	0.160173
ENSG00000142949	PTPRF	chr1	43525188	43623666	rs12120857:43979413:C:T	43513742	43513742	0	4.55e-17	0.614955	0.0699856
ENSG00000142949	PTPRF	chr1	43525188	43623666	rs201549563:44550599:AG:A	44084927	44084928	1	6.75e-07	-0.394195	0.0780705
ENSG00000066135	KDM4A	chr1	43650159	43705515	rs114347687:44351251:G:A	43885579	43885579	0	5.48e-07	-6.06596	1.19143
ENSG00000236200	KDM4A-AS1	chr1	43699766	43708138	rs114347687:44351251:G:A	43885579	43885579	0	1.68e-17	1.9434	0.217878
ENSG00000236200	KDM4A-AS1	chr1	43699766	43708138	rs11210871:44029353:C:G	43563682	43563682	1	6.53e-07	0.36702	0.0725945
ENSG00000126091	ST3GAL3	chr1	43705825	43931165	rs3791058:44270310:T:C	43804639	43804639	0	8.53e-08	0.376761	0.0690499
ENSG00000126091	ST3GAL3	chr1	43705825	43931165	rs114361356:44161275:G:A	43695604	43695604	1	1.33e-07	-1.14804	0.21373
ENSG00000229444	RP11-184I16.4	chr1	43709393	43727343	rs12122504:44256819:C:G	43791148	43791148	0	5.4e-09	-0.407818	0.0683769
ENSG00000229444	RP11-184I16.4	chr1	43709393	43727343	rs76760124:44186396:A:G	43720725	43720725	1	2.87e-08	-0.829198	0.146475
ENSG00000229444	RP11-184I16.4	chr1	43709393	43727343	rs114347687:44351251:G:A	43885579	43885579	2	3.24e-05	-0.981198	0.233428
ENSG00000229444	RP11-184I16.4	chr1	43709393	43727343	rs61769029:43771249:C:G	43305578	43305578	3	3.18e-05	-1.30368	0.309802
ENSG00000117407	ARTN	chr1	43933321	43937241	rs783304:44365457:A:G	43899785	43899785	0	1.81e-18	0.368219	0.0399697
ENSG00000237950	RP11-7O11.3	chr1	43944371	43946551	rs201869658:44377305:C:A	43911633	43911633	0	2.07e-07	0.265849	0.0502997
ENSG00000117408	IPO13	chr1	43946940	43968022	rs150936757:44444138:C:G	43978466	43978466	0	1.26e-08	-5.64852	0.971854
ENSG00000117410	ATP6V0B	chr1	43974488	43978295	exm53353	43981741	43981741	0	1.63e-06	-0.775855	0.159404
ENSG00000117410	ATP6V0B	chr1	43974488	43978295	rs603786:43622560:T:C	43156889	43156889	1	2.43e-05	-0.32282	0.0755825
ENSG00000117419	ERI3	chr1	44221071	44355260	rs1291057:44565647:G:A	44099975	44099975	0	3.11e-05	-0.575665	0.136617
ENSG00000187147	RNF220	chr1	44405195	44651724	rs112096253:45126624:A:G	44660952	44660952	0	6.24e-13	2.11168	0.283882
ENSG00000198520	C1orf228	chr1	44674693	44725591	rs61789885:45146806:G:A	44681134	44681134	0	7.77e-07	0.367386	0.0731801
ENSG00000198520	C1orf228	chr1	44674693	44725591	rs34617431:45270790:T:TAAAG	44805118	44805118	1	3.36e-05	0.388112	0.0925169
ENSG00000142937	RPS8	chr1	44775252	44778779	rs71653933:45342881:A:C	44877209	44877209	0	5.8e-15	-11.9128	1.46709
ENSG00000117425	PTCH2	chr1	44819845	44843063	exm55344	45566639	45566639	0	5.74e-08	0.726766	0.131385
ENSG00000070785	EIF2B3	chr1	44850523	44986722	rs57139686:45304774:G:A	44839102	44839102	0	6.45e-10	1.01638	0.160485
ENSG00000126088	UROD	chr1	45012148	45015575	rs57139686:45304774:G:A	44839102	44839102	0	6.48e-07	-1.11013	0.219504
ENSG00000162415	ZSWIM5	chr1	45016400	45306209	rs72686447:45766922:C:T	45301250	45301250	0	7.79e-05	1.61687	0.405007
ENSG00000070759	TESK2	chr1	45343884	45491166	rs505207:46023781:T:A	45558109	45558109	0	2.1e-09	-0.478671	0.0780873
ENSG00000280670	CCDC163P	chr1	45493867	45500079	rs6688516:45985760:G:A	45520088	45520088	0	3.15e-132	-4.92445	0.13224
ENSG00000132763	MMACHC	chr1	45500054	45513382	rs6688516:45985760:G:A	45520088	45520088	0	1.67e-13	-0.489365	0.0640947
ENSG00000117450	PRDX1	chr1	45511037	45523047	rs71052899:46000353:CT:C	45534681	45534682	0	9.03e-10	-9.67829	1.54214
ENSG00000117448	AKR1A1	chr1	45550544	45570049	1:46007032:CAA:C	45541360	45541362	0	1.86e-09	-1.29231	0.210091
ENSG00000159592	GPBP1L1	chr1	45627305	45688113	rs6662164:46146230:T:A	45680558	45680558	0	1.2e-05	-1.9346	0.436349
ENSG00000234329	RP11-767N6.2	chr1	45651040	45651826	rs79086794:46176576:A:T	45710904	45710904	0	8.39e-08	-0.149445	0.0273738
ENSG00000197429	IPP	chr1	45694325	45750650	rs6703960:46232723:C:T	45767051	45767051	0	2.59e-34	1.54918	0.115146
ENSG00000230896	RP11-767N6.7	chr1	45694685	45697075	rs35993035:46063844:C:CT	45598172	45598172	0	3.33e-11	0.15866	0.0232578
ENSG00000117461	PIK3R3	chr1	46040141	46133036	rs1416706:46602844:G:A	46137172	46137172	0	4.8e-43	-0.933713	0.0600093
ENSG00000117461	PIK3R3	chr1	46040141	46133036	rs41291502:46476864:G:A	46011192	46011192	1	0.000114579	-0.633367	0.16257
ENSG00000085998	POMGNT1	chr1	46188683	46220305	rs28364741:46664249:A:G	46198577	46198577	0	9.19e-06	-1.8908	0.420802
ENSG00000171357	LURAP1	chr1	46203335	46221261	rs2404764:46841334:G:A	46375662	46375662	0	7.57e-07	0.523274	0.104119
ENSG00000171357	LURAP1	chr1	46203335	46221261	rs114189885:46454390:C:A	45988718	45988718	1	6.75e-05	-0.622876	0.154658
ENSG00000173660	UQCRH	chr1	46303632	46316776	rs116775331:46852301:A:G	46386629	46386629	0	4.16e-09	-0.677481	0.112717
ENSG00000173660	UQCRH	chr1	46303632	46316776	rs12146051:46742952:G:C	46277280	46277280	1	8.37e-05	0.298907	0.0752071
ENSG00000117481	NSUN4	chr1	46340178	46365152	rs5013325:46814938:G:A	46349266	46349266	0	9.8e-33	1.90356	0.145733
ENSG00000117480	FAAH	chr1	46394266	46413848	rs6697851:46873281:G:C	46407609	46407609	0	5.93e-22	0.648312	0.06342
ENSG00000117480	FAAH	chr1	46394266	46413848	rs913168:46858576:T:C	46392904	46392904	1	1.83e-07	0.37904	0.071397
ENSG00000117480	FAAH	chr1	46394266	46413848	rs59914572:46990865:A:G	46525193	46525193	2	3.3e-05	0.367944	0.0876242
ENSG00000232022	FAAHP1	chr1	46432130	46482493	rs6699322:46882118:A:G	46416446	46416446	0	2.12e-15	-0.602237	0.0728992
ENSG00000232022	FAAHP1	chr1	46432130	46482493	rs72686225:47792494:C:T	47326822	47326822	1	3e-05	-1.1701	0.277168
ENSG00000079277	MKNK1	chr1	46557409	46616843	rs56869893:47082513:T:C	46616841	46616841	0	6e-07	0.412908	0.0813938
ENSG00000079277	MKNK1	chr1	46557409	46616843	rs78886501:48063902:G:A	47598230	47598230	1	3.04e-05	0.797313	0.188991
ENSG00000142961	MOB3C	chr1	46607716	46616891	rs35494693:47080983:G:A	46615311	46615311	0	2.45e-06	-0.311033	0.0650563
ENSG00000162367	TAL1	chr1	47216291	47232220	rs74073099:47250307:A:C	46784635	46784635	0	3.72e-05	-0.159586	0.0382638
ENSG00000123473	STIL	chr1	47250140	47314147	rs6691595:47875994:G:C	47410322	47410322	0	3.57e-05	0.23603	0.056454
ENSG00000162368	CMPK1	chr1	47333798	47378839	rs55686309:47104293:CA:C	46638621	46638622	0	3.73e-06	-2.91497	0.621351
ENSG00000272491	RP5-1024N4.4	chr1	48227889	48229561	rs1416047:48887102:C:G	48421430	48421430	0	6.23e-19	0.23058	0.0246602
ENSG00000132122	SPATA6	chr1	48295373	48472208	1:48884216:CAAAAAAAAAAAAAAAAAAA:C	48418544	48418563	0	4.67e-08	0.409378	0.073493
ENSG00000132122	SPATA6	chr1	48295373	48472208	rs12739960:48714984:T:C	48249312	48249312	1	1.83e-12	-0.634814	0.0872574
ENSG00000132122	SPATA6	chr1	48295373	48472208	rs12133082:48680305:G:A	48214633	48214633	2	4.76e-07	-0.349621	0.0682903
ENSG00000123080	CDKN2C	chr1	50960746	50974633	rs72663133:52224173:G:A	51758501	51758501	0	6.3e-05	-1.06582	0.263549
ENSG00000085832	EPS15	chr1	51354264	51519328	rs61782074:51825386:C:T	51359714	51359714	0	8.64e-19	6.055	0.6505
ENSG00000078618	NRDC	chr1	51789192	51878937	rs2474118:52281082:T:A	51815410	51815410	0	4.61e-09	0.862862	0.143999
ENSG00000078618	NRDC	chr1	51789192	51878937	rs78272062:52654506:C:G	52188834	52188834	1	8.29e-07	1.24637	0.248914
ENSG00000169213	RAB3B	chr1	51907957	51990764	rs71247585:52360939:T:TA	51895267	51895267	0	4.37e-07	-1.76066	0.342758
ENSG00000117862	TXNDC12	chr1	52020132	52056171	rs12745589:52351253:A:T	51885581	51885581	0	1.57e-05	-1.625	0.371713
ENSG00000085840	ORC1	chr1	52372830	52404459	rs138357728:52602397:G:A	52136725	52136725	0	2.35e-10	0.604083	0.0928949
ENSG00000134744	ZCCHC11	chr1	52408283	52553487	rs17107217	52424219	52424219	0	1.05e-78	52.8921	2.22224
ENSG00000116157	GPX7	chr1	52602373	52609051	rs11810754:53067914:T:G	52602242	52602242	0	3.25e-09	-0.202119	0.0333846
ENSG00000162377	COA7	chr1	52684452	52698366	rs34583856:53129867:CT:C	52664195	52664196	0	7.85e-11	-0.46701	0.0698802
ENSG00000162377	COA7	chr1	52684452	52698366	rs1288611:53960235:G:A	53494562	53494562	1	4.34e-05	0.663968	0.160605
ENSG00000162378	ZYG11B	chr1	52726468	52827342	rs71044430:53320865:GTAGTCTTGTTT:G	52855193	52855204	0	6.11e-08	-2.06258	0.373686
ENSG00000121310	ECHDC2	chr1	52895911	52927212	rs370787153:53422574:CTTTTTTTT:C	52956902	52956910	0	9.75e-15	-0.561419	0.0697725
ENSG00000121310	ECHDC2	chr1	52895911	52927212	rs6667002:53593925:T:C	53128253	53128253	1	4.39e-05	-0.402411	0.0973987
ENSG00000116171	SCP2	chr1	52927230	53051703	rs1242314:53417544:A:G	52951872	52951872	0	3.61e-41	7.15096	0.473119
ENSG00000162383	SLC1A7	chr1	53087180	53142632	rs1769299:53585723:G:T	53120051	53120051	1	1.26e-08	-0.396604	0.0682344
ENSG00000157184	CPT2	chr1	53196430	53214197	rs11578832:53674542:G:A	53208870	53208870	0	5.13e-08	-0.823894	0.148381
ENSG00000236723	RP5-1024G6.2	chr1	53209784	53213775	exm60284	53210776	53210776	0	4.12e-17	0.186232	0.0211625
ENSG00000162384	C1orf123	chr1	53214100	53220617	rs6588473:53729536:T:C	53263864	53263864	0	2.33e-29	-2.87375	0.235422
ENSG00000081870	HSPB11	chr1	53916575	53945929	rs1063162:54412181:T:C	53946508	53946508	0	8.3e-13	-0.704227	0.0952224
ENSG00000081870	HSPB11	chr1	53916575	53945929	rs78052945:55061488:C:T	54595815	54595815	1	6.85e-06	-0.692462	0.151902
ENSG00000116212	LRRC42	chr1	53946078	53968168	rs6704316:54757151:C:T	54291478	54291478	0	4.64e-05	0.816467	0.198269
ENSG00000116209	TMEM59	chr1	54026682	54053504	rs112235026:54515796:CT:C	54050123	54050124	0	3.42e-05	7.96911	1.90139
ENSG00000280378	RP4-758J24.6	chr1	54033127	54034880	rs11800038:54491758:C:T	54026085	54026085	0	1.18e-11	-0.736775	0.105465
ENSG00000215883	CYB5RL	chr1	54169652	54200036	rs140708162:54620197:G:A	54154524	54154524	0	3.56e-17	-3.73317	0.423282
ENSG00000116221	MRPL37	chr1	54184042	54225464	rs642990	54222843	54222843	0	8.44e-08	-0.704948	0.129152
ENSG00000184313	MROH7	chr1	54641755	54710266	rs202160778:55049965:GC:G	54584292	54584293	0	2.52e-08	0.390771	0.0687337
ENSG00000184313	MROH7	chr1	54641755	54710266	exm61537	54548340	54548340	1	3.53e-06	-0.832524	0.177019
ENSG00000271723	MROH7-TTC4	chr1	54641787	54742308	rs300270:55046095:A:C	54580422	54580422	0	2.5e-10	1.61747	0.249131
ENSG00000162402	USP24	chr1	55066360	55215113	rs494622:55581949:G:C	55116276	55116276	0	3.28e-09	0.58898	0.0973126
ENSG00000162402	USP24	chr1	55066360	55215113	rs372258159:55536362:GAGAAGAGAGGCTTTGACAGGGC:G	55070689	55070711	1	4.84e-07	0.865339	0.169134
ENSG00000162409	PRKAA2	chr1	56645323	56715335	rs35370550:57180699:GA:G	56715026	56715027	0	1.12e-06	-3.1828	0.643502
ENSG00000173406	DAB1	chr1	56994779	58546734	rs11587719:57729677:A:C	57264004	57264004	0	1.7e-06	1.00861	0.207624
ENSG00000162600	OMA1	chr1	58415385	58546802	rs67922378:58946539:C:CT	58480867	58480867	0	1.5e-05	0.975111	0.222468
ENSG00000162601	MYSM1	chr1	58654740	58700092	rs11207300:59172029:A:G	58706357	58706357	0	8.81e-12	0.691787	0.0983719
ENSG00000162601	MYSM1	chr1	58654740	58700092	rs35937590:59156352:AT:A	58690680	58690681	1	3.78e-05	-0.309372	0.0742358
ENSG00000162601	MYSM1	chr1	58654740	58700092	rs142359367:59707505:T:C	59241833	59241833	2	6.66e-05	1.29221	0.320613
ENSG00000232453	RP4-794H19.1	chr1	58882869	58903747	rs191333569:60055021:C:T	59589349	59589349	0	7.14e-05	0.263237	0.0655892
ENSG00000226476	RP11-776H12.1	chr1	60515717	60640491	rs147670591:61055346:C:CCTT	60589674	60589674	0	6.03e-14	0.518979	0.0666706
ENSG00000226476	RP11-776H12.1	chr1	60515717	60640491	rs116538054:60868541:C:T	60402869	60402869	1	1.41e-05	1.06173	0.241496
ENSG00000231252	RP11-436K8.1	chr1	60659632	60867998	rs35919065:61324556:GT:G	60858884	60858885	0	4.18e-07	-0.248856	0.0483627
ENSG00000162599	NFIA	chr1	60865260	61462793	rs71050110:61542770:G:GAGGGGAGA	61077098	61077098	0	2.9e-06	1.32203	0.278591
ENSG00000162604	TM2D1	chr1	61681047	61725423	rs692252:62222319:C:T	61756647	61756647	0	2.91e-05	1.45442	0.343886
ENSG00000132849	PATJ	chr1	61742478	62178675	rs7551399:62207254:A:G	61741582	61741582	0	2.73e-12	0.914908	0.126816
ENSG00000132849	PATJ	chr1	61742478	62178675	rs6678122:62301986:A:G	61836314	61836314	1	2.17e-07	-0.820162	0.155458
ENSG00000132849	PATJ	chr1	61742478	62178675	rs78046107:62587629:GA:G	62121957	62121958	2	2.34e-06	0.646137	0.134873
ENSG00000132854	KANK4	chr1	62236980	62319414	rs10789108:62713469:T:C	62247797	62247797	0	5.14e-38	-0.866412	0.0603428
ENSG00000132854	KANK4	chr1	62236980	62319414	rs10549488:62725767:TCTC:T	62260095	62260098	1	3.19e-06	-0.593075	0.125517
ENSG00000116641	DOCK7	chr1	62454299	62688368	rs1168040:62960575:T:C	62494904	62494904	0	3.83e-08	2.1846	0.389592
ENSG00000125703	ATG4C	chr1	62784136	62865513	rs199768640:63246354:A:AGT	62780683	62780683	0	1.79e-10	-0.637312	0.0973305
ENSG00000142856	ITGB3BP	chr1	63440771	63593721	rs113627367:63851551:A:ATTC	63385880	63385880	0	1.71e-70	-2.12042	0.0968243
ENSG00000203965	EFCAB7	chr1	63523373	63572693	rs35713007:63846847:C:T	63381176	63381176	0	2.92e-07	0.490176	0.0939546
ENSG00000203965	EFCAB7	chr1	63523373	63572693	rs11208139:63625152:T:A	63159481	63159481	1	2.55e-06	-0.37653	0.0788943
ENSG00000116652	DLEU2L	chr1	63547083	63550636	rs12119056	63366969	63366969	0	2.11e-08	-0.472585	0.082651
ENSG00000079739	PGM1	chr1	63593277	63660245	rs34854020:64016307:TA:T	63550636	63550637	0	5.28e-05	-1.76117	0.43091
ENSG00000162437	RAVER2	chr1	64745096	64833232	rs2780886:65331897:G:T	64866214	64866214	0	2.79e-17	-2.9041	0.328062
ENSG00000162434	JAK1	chr1	64833230	64966504	rs4916005:65309387:T:C	64843704	64843704	0	1.69e-12	-0.69707	0.0956482
ENSG00000162434	JAK1	chr1	64833230	64966504	rs74860172:65497547:T:A	65031864	65031864	1	6.91e-05	-0.623654	0.155084
ENSG00000162433	AK4	chr1	65147550	65232145	rs3934817:65613363:G:T	65147680	65147680	0	3.29e-11	-28.2776	4.14421
ENSG00000116675	DNAJC6	chr1	65248220	65415869	rs942861:65798843:G:A	65333160	65333160	0	5.23e-19	8.96995	0.956997
ENSG00000213625	LEPROT	chr1	65420588	65436007	rs10493377:65879252:A:G	65413569	65413569	0	1.85e-12	1.58306	0.217632
ENSG00000116678	LEPR	chr1	65420653	65641559	rs9436743:65901119:T:C	65435436	65435436	0	2.14e-30	-0.804958	0.0645395
ENSG00000116678	LEPR	chr1	65420653	65641559	rs139569596:65986990:G:A	65521307	65521307	1	8.31e-10	1.94826	0.309736
ENSG00000116678	LEPR	chr1	65420653	65641559	rs59255837:65906981:AG:A	65441298	65441299	2	6.92e-06	0.510514	0.112046
ENSG00000184588	PDE4B	chr1	65792515	66374579	rs6588174:66367191:T:G	65901508	65901508	0	1.29e-06	-1.72318	0.350569
ENSG00000118473	SGIP1	chr1	66533384	66748299	rs76666857:67159241:T:C	66693558	66693558	0	2.29e-06	-25.1313	5.24067
ENSG00000152760	TCTEX1D1	chr1	66752460	66778787	rs604737	66743405	66743405	0	5.67e-48	1.04073	0.0622629
ENSG00000152760	TCTEX1D1	chr1	66752460	66778787	rs7515248:67239462:T:C	66773779	66773779	1	3.44e-10	-0.614029	0.0953622
ENSG00000152763	WDR78	chr1	66812886	66924887	rs56798296:67360175:T:C	66894492	66894492	0	2.21e-11	1.0314	0.149762
ENSG00000203963	C1orf141	chr1	67092166	67231853	rs35666001:67657652:TA:T	67191969	67191970	0	1.78e-09	-0.94358	0.153212
ENSG00000275678	RP4-547N15.3	chr1	67121606	67123956	rs68123283:67567333:A:G	67101650	67101650	0	1.47e-17	-1.15754	0.129522
ENSG00000275678	RP4-547N15.3	chr1	67121606	67123956	rs35666001:67657652:TA:T	67191969	67191970	1	3.11e-05	-0.302715	0.071852
ENSG00000116717	GADD45A	chr1	67685062	67688338	rs201181849:67476093:G:GAA	67010410	67010410	0	1.87e-05	3.86209	0.891536
ENSG00000172380	GNG12	chr1	67701467	67833467	rs74861844:68470217:G:A	68004534	68004534	0	9.31e-09	-0.407848	0.0695182
ENSG00000172380	GNG12	chr1	67701467	67833467	rs114823637:68321186:A:G	67855503	67855503	1	7.39e-06	0.545992	0.120219
ENSG00000162595	DIRAS3	chr1	68045963	68051631	rs71844530:68107497:GTAA:G	67641814	67641817	1	1.5e-05	-0.519741	0.11858
ENSG00000116729	WLS	chr1	68098474	68233120	rs12564247:68593243:C:T	68127560	68127560	0	5.29e-06	10.4149	2.25649
ENSG00000033122	LRRC7	chr1	69568399	70151945	rs201505374:69583835:G:T	69118152	69118152	0	4.96e-08	-0.828074	0.14896
ENSG00000197568	HHLA3	chr1	70354806	70385339	rs12732737:70823816:C:G	70358133	70358133	0	6.17e-22	-0.821398	0.0803901
ENSG00000116761	CTH	chr1	70411219	70439851	rs10889869:70877964:G:A	70412281	70412281	0	2.04e-11	-0.868162	0.125826
ENSG00000116761	CTH	chr1	70411219	70439851	rs543860:70901853:A:G	70436170	70436170	1	3.29e-05	-0.352023	0.0838073
ENSG00000271992	RP11-42O15.3	chr1	70445072	70445536	rs3889364:70847310:A:G	70381627	70381627	0	5.65e-06	-0.213717	0.0464501
ENSG00000050628	PTGER3	chr1	70852354	71047808	rs7528872:71383124:G:A	70917441	70917441	0	3.53e-06	0.511865	0.108828
ENSG00000229956	ZRANB2-AS2	chr1	71081325	71489976	rs113504135:72307228:C:G	71841545	71841545	0	1.4e-05	0.349618	0.0794863
ENSG00000162620	LRRIQ3	chr1	74026016	74198187	rs533371:74687012:A:G	74221328	74221328	0	8.5e-58	-0.615435	0.0324187
ENSG00000254685	FPGT	chr1	74198213	74234086	rs68025428:74707535:CT:C	74241851	74241852	0	5.37e-10	0.451754	0.0709844
ENSG00000254685	FPGT	chr1	74198213	74234086	rs7524306:74528939:A:C	74063255	74063255	1	8.55e-09	-0.746947	0.126988
ENSG00000259030	FPGT-TNNI3K	chr1	74198236	74543982	rs792323:74707594:C:T	74241910	74241910	0	4.84e-19	-0.934912	0.0996402
ENSG00000259030	FPGT-TNNI3K	chr1	74198236	74543982	rs142867758:74584826:TTTA:T	74119142	74119145	1	2.37e-10	-0.447424	0.0688213
ENSG00000116783	TNNI3K	chr1	74235402	74544428	rs9970514:74703758:G:C	74238074	74238074	0	4.73e-12	1.08031	0.151532
ENSG00000116791	CRYZ	chr1	74705483	74733408	rs59091667:75200595:C:G	74734911	74734911	0	6.63e-12	0.961042	0.135803
ENSG00000116791	CRYZ	chr1	74705483	74733408	rs1424671:75189847:T:C	74724163	74724163	1	6.31e-12	-0.475338	0.0670949
ENSG00000116791	CRYZ	chr1	74705483	74733408	rs17617240:75173938:C:T	74708254	74708254	2	6.56e-12	-1.10873	0.156631
ENSG00000116791	CRYZ	chr1	74705483	74733408	kgp507955	74705527	74705527	3	5.65e-06	0.325566	0.0707624
ENSG00000162623	TYW3	chr1	74733153	74766678	rs5775261:75195162:C:CA	74729478	74729478	0	8.4e-07	-1.06089	0.211984
ENSG00000137968	SLC44A5	chr1	75202132	75611116	rs115071980:75865589:C:T	75399904	75399904	0	8.22e-07	0.767133	0.153151
ENSG00000137968	SLC44A5	chr1	75202132	75611116	rs142077685:75795836:G:GTATATGCATATATATACGTA	75330151	75330151	1	2.59e-05	0.378736	0.0889855
ENSG00000117054	ACADM	chr1	75724348	75787575	rs34813061:76140312:CA:C	75674627	75674628	0	1.65e-14	-0.553387	0.0694257
ENSG00000117054	ACADM	chr1	75724348	75787575	rs12064158:76476034:A:G	76010349	76010349	1	6.42e-14	-0.931991	0.119868
ENSG00000137955	RABGGTB	chr1	75786198	75795079	rs149388350:76125195:C:A	75659510	75659510	0	3.55e-07	1.80245	0.348074
ENSG00000057468	MSH4	chr1	75796883	75913238	rs116030564:76436250:A:G	75970565	75970565	0	4.97e-63	4.7216	0.233919
ENSG00000154027	AK5	chr1	77282052	77559969	rs12126361:77750130:G:A	77284445	77284445	0	1.51e-10	0.67594	0.102792
ENSG00000154027	AK5	chr1	77282052	77559969	rs6603960:78213434:A:T	77747749	77747749	1	2.22e-05	0.317609	0.073994
ENSG00000036549	ZZZ3	chr1	77562417	77683419	rs518834:78872987:T:C	78407302	78407302	0	4.2e-05	3.98463	0.962047
ENSG00000162616	DNAJB4	chr1	77979176	78017964	rs41311176:78470506:C:T	78004822	78004822	0	1.23e-15	-11.692	1.40242
ENSG00000122420	PTGFR	chr1	78303885	78539749	rs141150918:79048189:TATA:T	78582504	78582507	0	4.81e-08	0.221699	0.0398406
ENSG00000233290	RP11-147G16.1	chr1	82215221	82261133	rs1032880:82741827:T:G	82276143	82276143	0	9.95e-21	-1.62944	0.165015
ENSG00000137941	TTLL7	chr1	83865029	83999150	rs200489485:84327803:C:CG	83862120	83862120	0	1.42e-05	-8.29877	1.88802
ENSG00000271576	RP11-486G15.2	chr1	84076332	84077931	rs56211203:85203109:TA:T	84737426	84737427	0	4.22e-05	-0.903571	0.2182
ENSG00000142875	PRKACB	chr1	84078063	84238498	rs35111893:84536216:C:CT	84070533	84070533	0	1.11e-05	-5.16286	1.1598
ENSG00000117133	RPF1	chr1	84479260	84497790	rs7555807:84928086:T:A	84462403	84462403	1	5.07e-05	0.90831	0.221704
ENSG00000117151	CTBS	chr1	84549607	84574480	rs112037879:84944478:G:A	84478795	84478795	0	3.16e-11	1.28359	0.187935
ENSG00000117151	CTBS	chr1	84549607	84574480	rs12141472:85036784:C:T	84571101	84571101	1	2.21e-06	0.410817	0.0855361
ENSG00000180869	LINC01555	chr1	84628231	84635020	rs143327345:85142363:C:CAGG	84676680	84676680	0	7.6e-11	0.445293	0.0665765
ENSG00000117155	SSX2IP	chr1	84643708	84690803	rs76724353:85629839:C:A	85164156	85164156	0	5.57e-06	43.6728	9.48546
ENSG00000162643	WDR63	chr1	84999148	85133138	rs4907121:85474400:T:C	85008717	85008717	0	2.17e-05	0.108937	0.0253514
ENSG00000055732	MCOLN3	chr1	85018083	85048499	rs114479731:85867112:T:C	85401429	85401429	0	1.46e-08	1.07568	0.185944
ENSG00000280099	RP11-33E12.2	chr1	85152488	85154203	rs79744566:85673070:C:G	85207387	85207387	0	1.32e-06	1.82905	0.372474
ENSG00000162642	C1orf52	chr1	85249954	85259672	rs11161574	85261361	85261361	0	8.7e-06	-0.567166	0.125885
ENSG00000153904	DDAH1	chr1	85318482	85578363	rs4475804:85836466:G:T	85370783	85370783	0	2.12e-05	-3.62009	0.841295
ENSG00000117174	ZNHIT6	chr1	85649424	85708433	rs6689168:86174232:G:T	85708549	85708549	0	8.84e-32	1.53633	0.119816
ENSG00000171502	COL24A1	chr1	85729234	86156943	rs141383031:85996629:G:A	85530946	85530946	0	7.93e-07	15.1694	3.02411
ENSG00000122417	ODF2L	chr1	86346825	86396342	rs61802175:86559209:C:T	86093526	86093526	0	2.98e-05	2.66766	0.631636
ENSG00000261737	RP4-612B15.3	chr1	86703503	86704462	rs3834007:87169592:TAAG:T	86703909	86703912	0	1.57e-11	-0.183662	0.0264599
ENSG00000183291	SELENOF	chr1	86862446	86914424	rs112644789:87322891:A:G	86857208	86857208	0	2.22e-12	0.607833	0.0838818
ENSG00000183291	SELENOF	chr1	86862446	86914424	rs114326325:87115385:A:G	86649702	86649702	1	3.25e-05	1.31715	0.313374
ENSG00000153936	HS2ST1	chr1	86914649	87109998	rs11367921:87340924:GA:G	86875241	86875242	0	3.63e-06	-3.55034	0.755809
ENSG00000267272	LINC01140	chr1	87129766	87169198	rs28533273:87641352:T:C	87175669	87175669	0	2.23e-08	-0.414454	0.0726181
ENSG00000267272	LINC01140	chr1	87129766	87169198	rs149842962:87389593:C:T	86923910	86923910	1	6.19e-05	-1.15649	0.285653
ENSG00000065243	PKN2	chr1	88684223	88836255	rs11380483:89147443:A:AT	88681760	88681760	0	7.37e-15	2.93351	0.362784
ENSG00000137944	KYAT3	chr1	88935774	88992953	rs35781634:89419588:CT:C	88953905	88953906	0	1.36e-42	-0.879204	0.0568982
ENSG00000137944	KYAT3	chr1	88935774	88992953	rs1409150	89007492	89007492	1	6.95e-05	-0.278697	0.069326
ENSG00000117226	GBP3	chr1	89006667	89022894	rs17434342:89505742:C:G	89040059	89040059	0	6.87e-12	-1.31445	0.185887
ENSG00000162654	GBP4	chr1	89181149	89198932	rs665123:89695761:C:T	89230078	89230078	0	1.65e-12	1.98873	0.272753
ENSG00000197147	LRRC8B	chr1	89524837	89597864	rs146916467:89995422:AT:A	89529863	89529864	0	4.15e-08	0.967159	0.172936
ENSG00000197147	LRRC8B	chr1	89524837	89597864	rs12129364:90256485:A:C	89790926	89790926	1	3.35e-06	-0.370609	0.0786119
ENSG00000231999	FLJ27354	chr1	89583242	89632894	rs12745666:90778476:C:T	90312918	90312918	0	2.71e-05	-0.179041	0.0421675
ENSG00000171492	LRRC8D	chr1	89821015	89936611	rs200269847:89617426:A:AT	89151743	89151743	0	4.17e-05	-2.32017	0.559923
ENSG00000228175	GEMIN8P4	chr1	89993594	89994321	rs28434526:90025174:A:T	89559615	89559615	0	4.07e-05	0.254425	0.061318
ENSG00000143032	BARHL2	chr1	90711540	90717237	rs12144613:92100981:A:G	91635424	91635424	0	3.04e-05	0.600043	0.142223
ENSG00000162669	HFM1	chr1	91260767	91404869	rs17131429:91870410:G:C	91404853	91404853	0	1.08e-29	0.909747	0.0740053
ENSG00000162669	HFM1	chr1	91260767	91404869	rs74843031:91782011:G:A	91316454	91316454	1	1.06e-12	0.806754	0.10963
ENSG00000069702	TGFBR3	chr1	91680344	91906335	rs17883307:92270234:G:A	91804677	91804677	0	7.26e-06	0.908054	0.199767
ENSG00000189195	BTBD8	chr1	92080306	92184725	rs114319975:93607988:T:G	93142431	93142431	0	6.68e-06	-14.8594	3.25578
ENSG00000273487	RP4-621B10.8	chr1	92189238	92190707	rs181773811:92726387:T:G	92260830	92260830	0	5.17e-37	2.51521	0.178191
ENSG00000122484	RPAP2	chr1	92298966	92402056	rs11311021:92933519:GA:G	92467962	92467963	0	6.01e-06	-2.37516	0.517773
ENSG00000117500	TMED5	chr1	93149743	93180728	rs1057257:93621483:A:G	93155926	93155926	0	3.51e-13	0.524631	0.0697208
ENSG00000117500	TMED5	chr1	93149743	93180728	rs76729025:94125609:C:CGT	93660053	93660053	1	4.39e-06	-0.496818	0.106703
ENSG00000122483	CCDC18	chr1	93179920	93278730	rs12385720:93539383:G:A	93073826	93073826	0	1.72e-07	0.382393	0.0718645
ENSG00000122483	CCDC18	chr1	93179920	93278730	rs34869303:93772601:A:T	93307044	93307044	1	9.33e-05	1.15004	0.291338
ENSG00000223745	CCDC18-AS1	chr1	93262187	93346025	rs771453:93831694:A:C	93366137	93366137	0	1.04e-71	1.3039	0.0587876
ENSG00000223745	CCDC18-AS1	chr1	93262187	93346025	rs34206647:93638843:CAT:C	93173286	93173288	1	4.76e-15	-0.726307	0.0891393
ENSG00000223745	CCDC18-AS1	chr1	93262187	93346025	rs11432913:92984212:T:TA	92518655	92518655	2	3.47e-05	-0.33637	0.0803266
ENSG00000117505	DR1	chr1	93345889	93369498	rs10782959:93811569:A:G	93346012	93346012	0	1.24e-13	-1.88548	0.245555
ENSG00000137942	FNBP1L	chr1	93448132	93554661	rs7543847:93925862:G:A	93460305	93460305	0	1.31e-06	1.61188	0.328059
ENSG00000023909	GCLM	chr1	93885206	93909456	rs10874812:94392613:T:A	93927057	93927057	0	4.75e-06	-0.90332	0.19473
ENSG00000198691	ABCA4	chr1	93992836	94121132	rs3827713:94576524:G:C	94110968	94110968	0	9.77e-09	0.394057	0.0672667
ENSG00000198691	ABCA4	chr1	93992836	94121132	rs3789398:94511533:G:A	94045977	94045977	1	6.47e-06	0.345666	0.0756167
ENSG00000233482	RP11-78O9.1	chr1	94145112	94145619	rs6657063:94659394:C:G	94193838	94193838	0	5.15e-15	-0.311713	0.0383087
ENSG00000137962	ARHGAP29	chr1	94148989	94275068	rs5776202:94550715:G:A	94085159	94085159	0	1.25e-08	0.460514	0.0792233
ENSG00000137962	ARHGAP29	chr1	94148989	94275068	rs71588516:94709788:CAA:C	94244232	94244234	1	1.1e-06	0.357586	0.0722493
ENSG00000117528	ABCD3	chr1	94418456	94518666	rs72727492:94917600:A:G	94452044	94452044	0	1.73e-08	-3.61073	0.627524
ENSG00000224081	LINC01057	chr1	94613815	94855426	rs79367739:95249000:A:G	94783444	94783444	0	2.08e-05	0.463174	0.107533
ENSG00000143036	SLC44A3	chr1	94820343	94895246	rs10874895:95311928:C:G	94846372	94846372	0	1.93e-14	0.693765	0.0872812
ENSG00000143036	SLC44A3	chr1	94820343	94895246	rs9432391:95302957:A:G	94837401	94837401	1	4.44e-14	-0.900995	0.115089
ENSG00000235501	RP4-639F20.1	chr1	94927567	94963270	rs11165268:95369198:G:C	94903642	94903642	0	1.25e-05	-0.40502	0.0915344
ENSG00000152078	TMEM56	chr1	95117339	95197607	rs2766003:95426365:A:G	94960809	94960809	0	7.62e-06	-1.07906	0.237948
ENSG00000271092	TMEM56-RWDD3	chr1	95117924	95247225	rs7527510:95737267:T:G	95271711	95271711	0	5.66e-10	0.786267	0.123716
ENSG00000122481	RWDD3	chr1	95234156	95247225	rs259338:95738307:G:T	95272751	95272751	0	1.32e-35	-3.04933	0.221412
ENSG00000117569	PTBP2	chr1	96721666	96823738	rs273866:97263793:C:G	96798237	96798237	0	4.41e-05	1.18146	0.286051
ENSG00000117598	PLPPR5	chr1	98890246	99005032	rs1600777:99391461:G:A	98925905	98925905	0	1.65e-06	0.563774	0.115894
ENSG00000117600	PLPPR4	chr1	99263954	99309590	rs114906184:99689054:G:A	99223498	99223498	0	6.24e-06	-4.79819	1.04784
ENSG00000099260	PALMD	chr1	99645944	99694541	rs834984:100123338:G:A	99657782	99657782	0	2.03e-29	3.89327	0.318536
ENSG00000156869	FRRS1	chr1	99708704	99766631	rs34699904:99962833:G:A	99497277	99497277	0	1.67e-05	-0.117418	0.0269443
ENSG00000162688	AGL	chr1	99850085	99924023	rs7543433:100277039:T:C	99811483	99811483	0	1.55e-09	0.480253	0.0776707
ENSG00000162688	AGL	chr1	99850085	99924023	rs34705125:100210066:G:C	99744510	99744510	1	2.88e-08	0.92444	0.163309
ENSG00000162688	AGL	chr1	99850085	99924023	rs72728140:100611168:A:G	100145612	100145612	2	3.39e-08	-0.610126	0.108367
ENSG00000283495	AC096949.1	chr1	99861473	99921651	rs12134966:100713204:G:A	100247648	100247648	0	1.27e-06	9.3891	1.90853
ENSG00000156875	MFSD14A	chr1	100038098	100083377	rs6687189:100533960:G:A	100068404	100068404	0	4.95e-05	0.894149	0.217942
ENSG00000156876	SASS6	chr1	100083564	100132955	rs12124225:100682244:G:A	100216688	100216688	0	2.04e-16	1.30879	0.152469
ENSG00000156876	SASS6	chr1	100083564	100132955	1:100338989:CT:C	99873433	99873434	1	2.45e-05	-0.615545	0.144187
ENSG00000122477	LRRC39	chr1	100148450	100178273	rs76609629:100685266:C:T	100219710	100219710	0	1.79e-40	37.1875	2.48773
ENSG00000137992	DBT	chr1	100186920	100249834	rs111614499:100709496:G:GA	100243940	100243940	0	6.62e-05	0.796397	0.197516
ENSG00000137996	RTCA	chr1	100266208	100292769	rs11370389:100763947:T:TG	100298391	100298391	0	1.61e-11	-1.59723	0.230247
ENSG00000079335	CDC14A	chr1	100345026	100520277	rs7545610:100841497:G:A	100375941	100375941	0	3.21e-05	1.03071	0.245075
ENSG00000162692	VCAM1	chr1	100719743	100739045	rs3844028	100646059	100646059	0	7.02e-10	-1.14184	0.180704
ENSG00000162694	EXTL2	chr1	100872373	100895998	rs3737580:101360215:C:T	100894659	100894659	0	3.23e-07	-1.8111	0.348487
ENSG00000162695	SLC30A7	chr1	100896077	100981753	rs3082871:101240470:G:GTA	100774914	100774914	0	1.68e-07	0.368592	0.0692085
ENSG00000162695	SLC30A7	chr1	100896077	100981753	rs3900628:101657185:C:A	101191629	101191629	1	4.12e-05	-0.299243	0.0721602
ENSG00000233184	RP11-421L21.3	chr1	101025879	101087268	rs71662918:101590179:G:A	101124623	101124623	0	3.15e-10	0.584264	0.0905271
ENSG00000060718	COL11A1	chr1	102876468	103108496	rs7522293:103539981:A:G	103074425	103074425	0	7.2e-09	-3.65078	0.617431
ENSG00000185946	RNPC3	chr1	103525692	103555239	rs72679200:103118331:C:A	102652775	102652775	0	4.78e-05	5.30896	1.29141
ENSG00000240038	AMY2B	chr1	103553816	103579534	rs4244372:104040027:T:A	103497405	103497405	0	9.64e-10	7.36325	1.17537
ENSG00000243480	AMY2A	chr1	103616812	103625780	rs17014930:104128773:T:C	103586151	103586151	0	1.63e-07	0.644394	0.120869
ENSG00000243480	AMY2A	chr1	103616812	103625780	rs60555558:104346487:G:A	103803865	103803865	1	7.45e-05	0.330302	0.0825155
ENSG00000215869	RP11-364B6.2	chr1	104072984	104226678	rs59396257:104602917:T:A	104060295	104060295	0	3.71e-09	0.633211	0.104999
ENSG00000215869	RP11-364B6.2	chr1	104072984	104226678	rs12410916:104620415:G:C	104077793	104077793	1	9.63e-14	0.684652	0.0887323
ENSG00000215869	RP11-364B6.2	chr1	104072984	104226678	rs6686128:104599488:C:T	104056866	104056866	2	4.57e-05	0.29171	0.0707744
ENSG00000198890	PRMT6	chr1	107056680	107059294	rs12401598:107580533:C:A	107037911	107037911	0	8.93e-30	-1.36535	0.110881
ENSG00000134215	VAV3	chr1	107571161	107965144	rs17020055:108336533:A:C	107793911	107793911	0	5.07e-25	1.18159	0.106771
ENSG00000134215	VAV3	chr1	107571161	107965144	rs2085718:108501893:A:T	107959271	107959271	1	1.47e-05	0.351502	0.0801133
ENSG00000085491	SLC25A24	chr1	108134037	108200849	rs61799378:108742130:T:C	108199508	108199508	0	6.64e-21	0.723741	0.0729227
ENSG00000085491	SLC25A24	chr1	108134037	108200849	rs828986:108737112:G:A	108194490	108194490	1	4.08e-07	-0.410208	0.0796425
ENSG00000260879	RP11-483I13.5	chr1	108199927	108201491	rs828999	108202312	108202312	0	1.35e-21	0.444423	0.0439098
ENSG00000162636	FAM102B	chr1	108560090	108644900	rs41278478:109177802:G:A	108635180	108635180	0	2.4e-10	1.24901	0.192186
ENSG00000162636	FAM102B	chr1	108560090	108644900	rs6657994:109185859:T:C	108643237	108643237	1	3.11e-05	-0.610582	0.144909
ENSG00000116266	STXBP3	chr1	108746675	108809526	rs145002027:109295955:TTA:T	108753333	108753335	0	7.47e-29	0.870394	0.0720729
ENSG00000116266	STXBP3	chr1	108746675	108809526	rs114713488:109751285:A:C	109208663	109208663	1	3.07e-06	-1.02688	0.21695
ENSG00000121957	GPSM2	chr1	108875351	108934545	rs7550668:109399244:G:A	108856622	108856622	0	1.19e-10	-1.44197	0.21799
ENSG00000121940	CLCC1	chr1	108929509	108963457	rs7523050:109417679:C:A	108875057	108875057	0	2.54e-09	1.68252	0.275937
ENSG00000197780	TAF13	chr1	109062487	109076002	rs183177077:109656089:A:G	109113467	109113467	0	2.58e-05	0.91241	0.214322
ENSG00000273382	RP5-1065J22.8	chr1	109087972	109090858	rs112082443:109660295:A:G	109117673	109117673	0	7.46e-10	0.359967	0.0570614
ENSG00000116299	KIAA1324	chr1	109113680	109206781	rs185066128:109240255:C:T	108697633	108697633	0	1.36e-16	2.913	0.337172
ENSG00000134222	PSRC1	chr1	109279557	109283186	rs649281:109799244:T:C	109256622	109256622	0	1.84e-07	-0.611252	0.115164
ENSG00000134222	PSRC1	chr1	109279557	109283186	rs6686174:110227477:A:G	109684855	109684855	1	2.33e-05	-0.510062	0.119151
ENSG00000221986	MYBPHL	chr1	109292366	109307041	rs3879448:109891423:G:C	109348801	109348801	0	2.33e-07	-0.494076	0.0939088
ENSG00000134243	SORT1	chr1	109309569	109397951	rs485660:110023432:G:A	109480810	109480810	0	2.87e-05	-4.83788	1.14318
ENSG00000143106	PSMA5	chr1	109399032	109426427	exm81076	109297547	109297547	0	7.2e-07	3.35595	0.666409
ENSG00000162650	ATXN7L2	chr1	109483480	109492804	rs10494041:110031990:C:G	109489368	109489368	0	2.81e-08	0.516409	0.0911528
ENSG00000162650	ATXN7L2	chr1	109483480	109492804	rs34987549:109586731:C:A	109044109	109044109	1	1.05e-05	-0.325404	0.0728965
ENSG00000181754	AMIGO1	chr1	109504176	109509738	rs2570972:110052139:A:G	109509517	109509517	0	6.89e-22	4.87245	0.477501
ENSG00000134183	GNAT2	chr1	109603268	109619929	rs146671905:110145758:ACCTGGGGGGTCTTCTAACTACTGG:A	109603136	109603160	0	2.17e-07	-4.93465	0.93529
ENSG00000168765	GSTM4	chr1	109656082	109674836	rs865774:110169190:C:T	109626568	109626568	0	3.41e-18	0.80266	0.0879183
ENSG00000168765	GSTM4	chr1	109656082	109674836	rs2269340:110172236:T:C	109629614	109629614	1	3.96e-11	0.879121	0.129396
ENSG00000168765	GSTM4	chr1	109656082	109674836	rs116586116:110152069:A:G	109609447	109609447	2	4.29e-07	-1.44783	0.281662
ENSG00000213366	GSTM2	chr1	109668023	109709551	rs592792:110211956:C:T	109669334	109669334	0	9.67e-16	-0.820352	0.0980045
ENSG00000213366	GSTM2	chr1	109668023	109709551	rs36209093:110229787:C:T	109687165	109687165	1	1.1e-09	-0.524929	0.0840932
ENSG00000134184	GSTM1	chr1	109687815	109709039	rs36209093:110229787:C:T	109687165	109687165	0	8.39e-23	-0.816648	0.078075
ENSG00000134184	GSTM1	chr1	109687815	109709039	rs5776993:110222901:CA:C	109680279	109680280	1	9.4e-09	-0.647306	0.110366
ENSG00000134201	GSTM5	chr1	109712256	109775428	rs28743105:110254513:C:G	109711891	109711891	0	1.02e-41	-0.886291	0.0581364
ENSG00000134201	GSTM5	chr1	109712256	109775428	rs3895838:110177848:A:G	109635226	109635226	1	9.81e-07	0.697002	0.140167
ENSG00000134201	GSTM5	chr1	109712256	109775428	1:110260568:G:GGT	109717946	109717946	2	1.95e-05	0.57013	0.131895
ENSG00000134202	GSTM3	chr1	109733933	109741038	rs4970777	109741163	109741163	0	8.8e-40	0.866104	0.0585869
ENSG00000134202	GSTM3	chr1	109733933	109741038	rs1292096:110253380:A:G	109710758	109710758	1	1.32e-17	-0.705313	0.0787876
ENSG00000134202	GSTM3	chr1	109733933	109741038	rs28743105:110254513:C:G	109711891	109711891	2	3.63e-09	-0.422182	0.0699588
ENSG00000134202	GSTM3	chr1	109733933	109741038	rs6668995:110287443:A:G	109744821	109744821	3	1.84e-06	-0.640805	0.132359
ENSG00000134202	GSTM3	chr1	109733933	109741038	rs72224194:110106185:T:TA	109563563	109563563	4	6.95e-06	-1.10458	0.242485
ENSG00000168710	AHCYL1	chr1	109984687	110023741	rs141819861:110493100:C:T	109950478	109950478	0	1.16e-06	-20.7861	4.20947
ENSG00000116396	KCNC4	chr1	110211344	110283100	rs12739021:110842850:T:C	110300228	110300228	0	3.8e-09	0.543707	0.09022
ENSG00000116396	KCNC4	chr1	110211344	110283100	rs12125441:110794438:A:G	110251816	110251816	1	1.75e-05	0.300723	0.0691724
ENSG00000227963	RP5-1074L1.1	chr1	110286376	110339171	rs112439723:110815319:G:GAGAGGAAA	110272697	110272697	0	2.61e-16	0.554869	0.0648929
ENSG00000227963	RP5-1074L1.1	chr1	110286376	110339171	rs74608578:111372073:G:A	110829451	110829451	1	4.17e-05	-1.0128	0.244405
ENSG00000224699	LAMTOR5-AS1	chr1	110347117	110443817	rs11102100:110957709:A:G	110415087	110415087	0	3.5e-09	-0.335768	0.0555808
ENSG00000134248	LAMTOR5	chr1	110401250	110407942	rs35040395:110937682:A:AT	110395060	110395060	0	1.29e-06	-1.41824	0.288447
ENSG00000240194	CYMP	chr1	110480753	110491277	rs12407530:111003777:T:C	110461155	110461155	0	3.01e-42	1.10677	0.0720049
ENSG00000259834	RP11-284N8.3	chr1	110653561	110657040	rs343793:111302762:A:T	110760140	110760140	0	3.04e-09	0.422887	0.0697198
ENSG00000259834	RP11-284N8.3	chr1	110653561	110657040	rs2640494:111184581:G:C	110641959	110641959	1	8.17e-06	-0.369437	0.0817449
ENSG00000177272	KCNA3	chr1	110672466	110675033	rs343788:111295407:C:A	110752785	110752785	0	7.81e-06	0.121241	0.0267663
ENSG00000156171	DRAM2	chr1	111117334	111140216	rs3795823:111726869:G:A	111184247	111184247	0	9.95e-23	1.78843	0.171318
ENSG00000162777	DENND2D	chr1	111187175	111204535	rs6143371:111739771:G:GCAGGACAAA	111197149	111197149	0	5.07e-06	-0.134356	0.0290531
ENSG00000173947	PIFO	chr1	111346289	111353013	rs17027391:111852792:C:T	111310170	111310170	0	1.2e-17	2.97884	0.33231
ENSG00000085465	OVGP1	chr1	111414315	111427777	rs1264878:111947430:C:T	111404808	111404808	0	5.82e-09	-0.582667	0.0979103
ENSG00000116459	ATP5F1	chr1	111448865	111462773	rs1270853:111991845:C:A	111449223	111449223	0	1.42e-08	2.23905	0.386671
ENSG00000143110	C1orf162	chr1	111473793	111478512	rs2152783:111936777:A:G	111394155	111394155	0	2.3e-05	-0.469801	0.109651
ENSG00000121933	TMIGD3	chr1	111483349	111563962	rs2789539:112032347:G:A	111489725	111489725	0	4.72e-14	-0.304886	0.0389892
ENSG00000116473	RAP1A	chr1	111542219	111716691	rs72697816:112222279:C:T	111679657	111679657	0	6.63e-07	-1.97644	0.391158
ENSG00000227811	FAM212B-AS1	chr1	111739842	111747798	rs12122793:112296631:T:C	111754009	111754009	0	1.59e-06	0.605268	0.124234
ENSG00000227811	FAM212B-AS1	chr1	111739842	111747798	rs5777080:112316047:C:CT	111773425	111773425	1	9.57e-07	-0.384459	0.0772354
ENSG00000064703	DDX20	chr1	111755246	111768016	rs475620:112335252:C:T	111792630	111792630	0	9.84e-08	1.02071	0.188015
ENSG00000143079	CTTNBP2NL	chr1	112396182	112463456	rs2492501	112388634	112388634	0	7.65e-12	-1.58681	0.224934
ENSG00000134245	WNT2B	chr1	112466542	112530165	rs2492501	112388634	112388634	0	3.9e-09	-0.505356	0.0839223
ENSG00000134245	WNT2B	chr1	112466542	112530165	rs2780261:113033261:A:G	112490639	112490639	1	9.65e-08	-0.442174	0.0813932
ENSG00000273483	RP4-671G15.2	chr1	112517800	112518441	rs71584754:113144705:CAAAAAAAAAAAA:C	112602083	112602095	0	2.97e-06	-0.153947	0.0324784
ENSG00000007341	ST7L	chr1	112523519	112620825	rs6691932:113144263:T:C	112601641	112601641	0	1.9e-17	1.19561	0.134289
ENSG00000116489	CAPZA1	chr1	112619174	112671619	rs11102518:113183848:A:T	112641226	112641226	0	1.68e-08	-1.7102	0.296943
ENSG00000155366	RHOC	chr1	112701107	112707434	rs2492501	112388634	112388634	0	1.39e-06	-3.47382	0.708791
ENSG00000184599	FAM19A3	chr1	112720420	112727235	rs34096274:113506567:CT:C	112963945	112963946	0	1.2e-05	-2.82272	0.636585
ENSG00000215866	LINC01356	chr1	112820171	112850643	rs11578535:113356094:T:C	112813472	112813472	0	1.3e-16	0.794543	0.0919005
ENSG00000224167	RP3-522D1.1	chr1	112850029	112877871	rs143441684:114249739:TG:T	113707117	113707118	0	2.94e-05	0.676763	0.160118
ENSG00000155380	SLC16A1	chr1	112911848	112957013	rs113968328:113512186:G:A	112969564	112969564	0	1.38e-07	-9.97187	1.85887
ENSG00000226419	SLC16A1-AS1	chr1	112956416	113047055	rs10494151:113668917:A:C	113126295	113126295	0	3.52e-09	1.05681	0.174969
ENSG00000226419	SLC16A1-AS1	chr1	112956416	113047055	1:113430731:ATTTTTT:A	112888109	112888115	1	1.45e-08	-0.449922	0.0777598
ENSG00000081026	MAGI3	chr1	113390750	113685923	rs34264654:114298518:TA:T	113755896	113755897	0	2.14e-10	-5.33836	0.818992
ENSG00000116793	PHTF1	chr1	113696832	113759489	rs17032448:114682915:T:G	114140293	114140293	0	3.79e-05	1.37886	0.33096
ENSG00000116793	PHTF1	chr1	113696832	113759489	rs7529353:114420462:G:A	113877840	113877840	1	5.82e-06	-0.370784	0.0807026
ENSG00000232450	RP4-730K3.3	chr1	113698885	113699631	rs1217194:114163501:C:G	113620879	113620879	0	6.69e-09	0.21148	0.0356861
ENSG00000081019	RSBN1	chr1	113761833	113812476	rs1228280:114154652:A:G	113612030	113612030	0	7.44e-08	2.28171	0.416206
ENSG00000134242	PTPN22	chr1	113813812	113871759	rs34122108:114398112:C:T	113855490	113855490	0	3.76e-07	0.1923	0.0372164
ENSG00000188761	BCL2L15	chr1	113878169	113887547	rs34752806:114426103:C:CA	113883481	113883481	0	4.49e-12	-0.269599	0.0377723
ENSG00000134262	AP4B1	chr1	113894749	113905201	exm2230834	113904943	113904943	0	2.94e-14	-3.15725	0.400239
ENSG00000118655	DCLRE1B	chr1	113905142	113914086	rs7544251:114544714:A:G	114002092	114002092	0	1.1e-05	1.11381	0.250134
ENSG00000235527	HIPK1-AS1	chr1	113924001	113929492	rs1806735:114528368:C:T	113985746	113985746	0	1.95e-05	0.592166	0.137008
ENSG00000235527	HIPK1-AS1	chr1	113924001	113929492	rs76352403:114686640:T:C	114144018	114144018	1	4.91e-05	-0.547109	0.133298
ENSG00000163349	HIPK1	chr1	113929193	113977869	rs2147079:114469503:A:G	113926881	113926881	0	1.59e-09	-0.487332	0.0788786
ENSG00000163349	HIPK1	chr1	113929193	113977869	rs924778:114529141:G:A	113986519	113986519	1	4.02e-05	0.462133	0.111286
ENSG00000116774	OLFML3	chr1	113979392	114035572	rs56208418:114524980:TG:T	113982358	113982359	0	1.96e-06	0.132099	0.0273596
ENSG00000134207	SYT6	chr1	114089292	114153919	rs12729894:114481962:T:G	113939340	113939340	0	2.67e-05	-0.592213	0.139374
ENSG00000175984	DENND2C	chr1	114582849	114670422	rs1484835:115165869:T:C	114623248	114623248	0	3.84e-05	0.865956	0.207981
ENSG00000213281	NRAS	chr1	114704470	114716894	rs72703606:116247623:C:T	115705002	115705002	0	4.17e-05	1.9569	0.472262
ENSG00000134198	TSPAN2	chr1	115048012	115089500	rs6688453:115627098:C:G	115084477	115084477	0	7.36e-19	-0.824662	0.0883988
ENSG00000173218	VANGL1	chr1	115641954	115698224	rs12134884:116209857:G:A	115667236	115667236	0	4.04e-06	-0.745653	0.159536
ENSG00000177551	NHLH2	chr1	115836378	115843917	rs61344671:116317780:CA:C	115775159	115775160	0	4.25e-11	-0.516451	0.0761432
ENSG00000163393	SLC22A15	chr1	115976499	116070054	rs12144702:116500555:G:C	115957934	115957934	0	1.35e-18	-3.34133	0.36121
ENSG00000203865	ATP1A1-AS1	chr1	116392248	116418622	rs850610:116948712:G:A	116406090	116406090	0	5.97e-08	-0.289401	0.0523881
ENSG00000134247	PTGFRN	chr1	116910058	116990358	rs17520400:117514675:G:A	116972053	116972053	0	3.02e-06	0.653177	0.137907
ENSG00000116830	TTF2	chr1	117060304	117107453	rs3767773:117604616:G:A	117061994	117061994	0	1.81e-110	7.2062	0.228828
ENSG00000134253	TRIM45	chr1	117111061	117122587	rs532777:117236913:T:C	116694291	116694291	0	8.09e-05	0.859757	0.215877
ENSG00000065183	WDR3	chr1	117929721	117966542	rs77805056:118626603:A:G	118083980	118083980	0	7.34e-13	3.49707	0.47167
ENSG00000155761	SPAG17	chr1	117953862	118185223	rs4373745:118544836:A:T	118002213	118002213	1	2.25e-05	-0.66684	0.155481
ENSG00000092607	TBX15	chr1	118883047	118989556	rs201346080:119568323:C:A	119025700	119025700	0	7.7e-14	0.241193	0.0311269
ENSG00000116874	WARS2	chr1	119031217	119140671	exm2268746	119012523	119012523	0	1.46e-53	-0.951366	0.0528259
ENSG00000116874	WARS2	chr1	119031217	119140671	rs17022747:119449721:G:A	118907098	118907098	1	1.61e-13	0.628536	0.0822625
ENSG00000116874	WARS2	chr1	119031217	119140671	rs17185520:118733044:G:A	118190421	118190421	2	6.02e-05	-0.339395	0.0836905
ENSG00000231365	RP11-418J17.1	chr1	119140397	119275973	rs10923754	119126017	119126017	0	1.35e-20	-0.721755	0.0733744
ENSG00000231365	RP11-418J17.1	chr1	119140397	119275973	rs76525150:120150189:A:T	119607566	119607566	1	6.75e-06	-0.333462	0.0730985
ENSG00000231365	RP11-418J17.1	chr1	119140397	119275973	rs72691119:119786229:G:T	119243606	119243606	2	3.48e-05	0.466031	0.111314
ENSG00000143067	ZNF697	chr1	119619423	119647773	rs2281493	119620164	119620164	0	3.53e-06	-0.2591	0.0550873
ENSG00000261662	RP5-1042I8.7	chr1	119909256	119910613	rs144009732:120618076:C:T	120075469	120075469	0	1.29e-05	0.31245	0.0707351
ENSG00000274642	CH17-472G23.1	chr1	120197086	120319680	rs71074452:120672593:CA:C	120130008	120130009	0	9.89e-06	0.593611	0.1326
ENSG00000223804	CH17-472G23.2	chr1	120267335	120341871	kgp4374968	120954647	120954647	0	2.42e-25	-0.799979	0.0717285
ENSG00000223804	CH17-472G23.2	chr1	120267335	120341871	rs61806594:144860783:C:T	120498213	120498213	1	9.49e-09	-0.706342	0.120467
ENSG00000223804	CH17-472G23.2	chr1	120267335	120341871	rs140901974:120750047:G:GT	121273290	121273290	2	2.29e-05	-0.424294	0.0990248
ENSG00000270392	PFN1P2	chr1	120432205	120434052	rs6600673:121168848:T:C	121426988	121426988	0	2.4e-08	0.195061	0.0342543
ENSG00000270231	NBPF8	chr1	120436354	120467739	kgp4374968	120954647	120954647	0	4.23e-38	-0.958939	0.0666913
ENSG00000270231	NBPF8	chr1	120436354	120467739	rs28971494:121138099:T:C	121396239	121396239	1	2.03e-07	-0.508329	0.0961162
ENSG00000270231	NBPF8	chr1	120436354	120467739	rs146761989:120681315:C:T	120138746	120138746	2	2.77e-06	0.944506	0.19862
ENSG00000275131	CH17-472G23.4	chr1	120489861	120701289	exm-rs11249433	121538815	121538815	0	1.58e-16	0.591407	0.0686166
ENSG00000275131	CH17-472G23.4	chr1	120489861	120701289	kgp4374968	120954647	120954647	1	1.08e-07	0.42893	0.0792597
ENSG00000273136	NBPF26	chr1	120723924	120841481	kgp4374968	120954647	120954647	0	3.29e-48	-13.8399	0.825271
ENSG00000226067	LINC00623	chr1	120913276	121009291	kgp4374968	120954647	120954647	0	8.33e-14	-0.331435	0.042837
ENSG00000171943	SRGAP2C	chr1	121184811	121392822	rs199877959:120850124:CAA:C	121173203	121173205	0	3.51e-60	-5.4162	0.277308
ENSG00000227082	CH17-437K3.1	chr1	121396755	121463129	rs35238847:121204299:AT:A	121462445	121462446	0	4.02e-14	-0.291064	0.0371099
ENSG00000266338	NBPF15	chr1	144421387	144461674	rs201636566:148651478:T:C	144366191	144366191	0	6.89e-06	4.4574	0.978122
ENSG00000196369	SRGAP2B	chr1	144887266	145095528	rs80314439:145687100:A:G	145747986	145747986	0	9.03e-10	-0.979059	0.156004
ENSG00000196369	SRGAP2B	chr1	144887266	145095528	1:145365369:T:G	146069633	146069633	1	0.00020417	-1.13617	0.303113
ENSG00000272419	RP11-403I13.8	chr1	145164100	145216058	rs9728619:145736438:T:C	145698627	145698627	0	1.14e-05	-0.535227	0.12041
ENSG00000162825	NBPF20	chr1	145289901	145405778	NHGRI_notinECorHUNT_chr1_145727683	145707383	145707383	0	7.3e-06	1.14252	0.251413
ENSG00000265491	RNF115	chr1	145738869	145824077	rs145691857:145622420:T:TG	145812673	145812673	0	0.000269632	2.21612	0.602939
ENSG00000198483	ANKRD35	chr1	145866561	145885866	exm91537	145873487	145873487	0	4.33e-08	-0.300154	0.0537494
ENSG00000265241	RBM8A	chr1	145917715	145927678	rs139428292:145507646:G:A	145927447	145927447	0	2.97e-15	-14.1636	1.72424
ENSG00000271601	LIX1L	chr1	145933424	145958001	rs61816397:145312597:T:C	146125597	146125597	0	6.49e-06	-0.365396	0.0799479
ENSG00000271601	LIX1L	chr1	145933424	145958001	rs4126494:145434931:A:G	146000129	146000129	1	3.37e-05	-0.717388	0.171044
ENSG00000233396	RP11-458D21.1	chr1	146052567	146061948	rs79906727:145420676:T:C	146014328	146014328	0	1.95e-12	0.923215	0.127057
ENSG00000233396	RP11-458D21.1	chr1	146052567	146061948	rs113063235:145287532:G:C	146150645	146150645	1	2.76e-07	-0.996832	0.190665
ENSG00000233396	RP11-458D21.1	chr1	146052567	146061948	rs3811446:145471996:C:G	145963094	145963094	2	0.000134474	0.505384	0.131081
ENSG00000233396	RP11-458D21.1	chr1	146052567	146061948	rs141935360:145302704:A:G	146135471	146135471	3	0.000121026	0.364618	0.0939209
ENSG00000271425	NBPF10	chr1	146064700	146144942	rs5013779:145365595:A:G	146069407	146069407	0	8.37e-26	-0.735042	0.0651842
ENSG00000271425	NBPF10	chr1	146064700	146144942	rs79906727:145420676:T:C	146014328	146014328	1	4.67e-12	0.908042	0.127329
ENSG00000213240	RP11-458D21.5	chr1	146113653	146229000	rs78848289:145426261:C:T	146008767	146008767	0	5.16e-07	0.307552	0.0602639
ENSG00000264343	NOTCH2NL	chr1	146146204	146229026	rs6667334:145384592:C:A	146050410	146050410	0	7.02e-10	1.08835	0.172243
ENSG00000264343	NOTCH2NL	chr1	146146204	146229026	rs76884578:145379797:T:G	146055206	146055206	1	1.05e-10	-0.48829	0.0735822
ENSG00000276509	CH17-353B19.1	chr1	146235807	146237807	rs78848289:145426261:C:T	146008767	146008767	0	5e-25	0.59753	0.0539863
ENSG00000268043	NBPF12	chr1	146938745	146996202	rs369717548:146325842:C:A	146890607	146890607	0	1.5e-07	-2.90183	0.542697
ENSG00000131791	PRKAB2	chr1	147155107	147172550	rs66485043:146690970:CT:C	147219398	147219399	0	9.7e-20	-1.44508	0.150716
ENSG00000131791	PRKAB2	chr1	147155107	147172550	rs56359955:146565981:G:A	147094415	147094415	1	4.87e-09	-0.445816	0.0745187
ENSG00000237188	RP11-337C18.8	chr1	147172772	147211568	rs58302214:146776049:CA:C	147304353	147304354	0	1.02e-12	-0.70349	0.0955263
ENSG00000180867	PDIA3P1	chr1	147178114	147179622	rs61091982:146721567:T:TTCTC	147249908	147249908	0	1.16e-21	-1.51966	0.149857
ENSG00000180867	PDIA3P1	chr1	147178114	147179622	rs6593737:146615020:C:T	147143441	147143441	1	5.66e-07	0.352161	0.069259
ENSG00000131778	CHD1L	chr1	147242642	147295766	rs10900330:146712302:T:G	147240653	147240653	0	2.61e-24	-0.671928	0.0617917
ENSG00000131778	CHD1L	chr1	147242642	147295766	rs4950310:146659964:A:G	147188385	147188385	1	4.15e-07	-0.705393	0.13705
ENSG00000131778	CHD1L	chr1	147242642	147295766	rs12129691:146554147:C:T	147082598	147082598	2	3.52e-05	0.339386	0.0811154
ENSG00000116128	BCL9	chr1	147541413	147626216	rs72698273:147038722:C:G	147566942	147566942	0	3.57e-13	1.87377	0.249104
ENSG00000162836	ACP6	chr1	147629653	147670496	rs4950465:147125235:C:T	147653122	147653122	0	1.1e-41	0.896965	0.0588659
ENSG00000162836	ACP6	chr1	147629653	147670496	rs77650336:147096505:C:T	147624704	147624704	1	8.55e-09	-1.72548	0.293341
ENSG00000263956	NBPF11	chr1	148102047	148152322	rs1875836	148256961	148256961	0	3.84e-22	-0.86942	0.0846117
ENSG00000263956	NBPF11	chr1	148102047	148152322	rs584323:146976471:G:A	147504660	147504660	1	5.39e-05	-0.300281	0.0735621
ENSG00000275140	CH17-478G19.2	chr1	148772641	148784594	rs2311586:144530678:T:C	149166310	149166310	0	2.67e-05	-1.24281	0.292477
ENSG00000178104	PDE4DIP	chr1	148808182	149048286	exm2268753	148989863	148989863	0	7.39e-08	-21.2164	3.869
ENSG00000269713	NBPF9	chr1	149054028	149103561	exm2268753	148989863	148989863	0	3.67e-09	0.442707	0.0733836
ENSG00000269713	NBPF9	chr1	149054028	149103561	rs200452541:144577767:G:GA	149119458	149119458	1	9.19e-08	-0.563566	0.103556
ENSG00000269713	NBPF9	chr1	149054028	149103561	rs10537324:145153782:CTA:C	148735121	148735123	2	9.31e-05	0.606593	0.153646
ENSG00000274265	CH17-189H20.1	chr1	149176023	149251013	exm2268753	148989863	148989863	0	7.2e-24	0.753968	0.0701122
ENSG00000215861	WI2-1896O14.1	chr1	149197993	149321732	rs12124527:144896319:T:C	148988155	148988155	0	1.99e-27	9.82304	0.839186
ENSG00000274423	RP11-544O24.2	chr1	149345662	149357612	rs375911331:144815576:T:G	149072036	149072036	0	6.11e-08	1.89157	0.342702
ENSG00000271383	NBPF19	chr1	149390624	149556361	rs145952127:149946276:T:C	149974347	149974347	0	8.97e-07	-34.033	6.81895
ENSG00000150337	FCGR1A	chr1	149782672	149792518	rs140764386:150263350:T:A	150290930	150290930	0	1.54e-05	1.19432	0.27293
ENSG00000203812	HIST2H2AA3	chr1	149842189	149842736	rs10305712:150802816:A:G	150830340	150830340	0	9.53e-06	1.08139	0.24111
ENSG00000261716	RP11-196G18.22	chr1	149844499	149849024	rs181487975:150123014:G:A	150150824	150150824	0	8.66e-06	5.17545	1.14841
ENSG00000272196	HIST2H2AA4	chr1	149851062	149851624	rs140621199:150272717:C:T	150300291	150300291	0	6.38e-06	0.848547	0.185501
ENSG00000264207	RP11-196G18.23	chr1	149861272	149862504	1:149781253:A:C	149809698	149809698	0	1.04e-08	-0.664544	0.113648
ENSG00000118298	CA14	chr1	150257160	150265078	rs60168104:150268390:TTTA:T	150295969	150295972	0	7.75e-11	0.460288	0.0688526
ENSG00000118298	CA14	chr1	150257160	150265078	rs41304255:150236107:G:A	150263708	150263708	1	6.55e-09	-1.29912	0.21908
ENSG00000118292	C1orf54	chr1	150268201	150280916	rs146000012:150741595:G:T	150769119	150769119	0	6.04e-06	-1.03198	0.225011
ENSG00000159208	CIART	chr1	150282544	150287093	rs60168104:150268390:TTTA:T	150295969	150295972	0	2.28e-19	3.70671	0.391031
ENSG00000266472	MRPS21	chr1	150293721	150308979	rs16836940:150416913:A:G	150444437	150444437	0	6.17e-20	0.763934	0.0792022
ENSG00000266472	MRPS21	chr1	150293721	150308979	1:150438853:CAAA:C	150466377	150466380	1	2.16e-06	0.34245	0.0712287
ENSG00000163125	RPRD2	chr1	150363092	150476566	rs138637164:150327896:C:CA	150355420	150355420	0	9.57e-08	-1.88575	0.347015
ENSG00000143374	TARS2	chr1	150487365	150507609	rs11589361:150510633:C:A	150538157	150538157	0	1.69e-08	-0.405833	0.0704741
ENSG00000143374	TARS2	chr1	150487365	150507609	rs11374139:151418522:C:CT	151446046	151446046	1	7.48e-05	0.601496	0.150297
ENSG00000143369	ECM1	chr1	150508063	150513789	rs77444832:150388945:A:T	150416469	150416469	0	1.61e-24	1.66525	0.152345
ENSG00000143369	ECM1	chr1	150508063	150513789	rs139708128:150245082:G:A	150272679	150272679	1	3.37e-07	1.34785	0.259773
ENSG00000143382	ADAMTSL4	chr1	150549370	150560937	rs76690929:150117615:G:C	150145437	150145437	0	3.37e-06	0.861335	0.182744
ENSG00000143384	MCL1	chr1	150574552	150579738	rs10556231:150712138:TCAA:T	150739662	150739665	0	1.18e-06	63.2938	12.8249
ENSG00000143420	ENSA	chr1	150600852	150629612	rs60104518:151125889:G:C	151153413	151153413	0	8.67e-05	-1.31047	0.330451
ENSG00000143420	ENSA	chr1	150600852	150629612	rs140626441:150596719:CAG:C	150624243	150624245	1	7.12e-05	-0.39539	0.0984996
ENSG00000143457	GOLPH3L	chr1	150646226	150697144	rs34813433:150717100:T:TATA	150744624	150744624	0	5.88e-12	-1.17599	0.16574
ENSG00000163131	CTSS	chr1	150730197	150765957	rs71766146:150640071:CTT:C	150667595	150667597	0	2.72e-16	1.56459	0.183106
ENSG00000143387	CTSK	chr1	150796209	150808323	rs12725667:150766070:A:T	150793594	150793594	0	3.57e-47	-0.91552	0.0553893
ENSG00000143387	CTSK	chr1	150796209	150808323	rs6694978:150919842:C:T	150947366	150947366	1	1.21e-07	-0.69076	0.12816
ENSG00000143437	ARNT	chr1	150809706	150876768	rs12124948:150527294:C:T	150554818	150554818	0	1.91e-09	-0.436346	0.07099
ENSG00000143437	ARNT	chr1	150809706	150876768	1:150740657:G:GTTTTTTTTT	150768181	150768181	1	3.11e-07	-0.380996	0.0732028
ENSG00000213190	MLLT11	chr1	151057759	151068497	rs6674970:151116279:G:A	151143803	151143803	0	2.02e-08	-3.27015	0.571142
ENSG00000143458	GABPB2	chr1	151070579	151125542	exm2259804	151150013	151150013	0	9.1e-11	-0.457074	0.0686389
ENSG00000143458	GABPB2	chr1	151070579	151125542	rs34557865:151197951:C:CT	151225475	151225475	1	5.47e-05	-0.393949	0.0965954
ENSG00000261168	RP11-68I18.10	chr1	151130076	151131610	rs7546304:151114484:C:G	151142008	151142008	0	5.03e-17	-0.378233	0.0431121
ENSG00000143434	SEMA6C	chr1	151131686	151146664	rs80071944:151116614:C:T	151144138	151144138	0	6.98e-15	1.25237	0.154733
ENSG00000143434	SEMA6C	chr1	151131686	151146664	rs6587552	151046385	151046385	1	4.15e-06	-0.350772	0.0751367
ENSG00000163156	SCNM1	chr1	151156665	151170297	rs61546100:151276819:G:GT	151304343	151304343	0	6.58e-05	0.495703	0.122895
ENSG00000143398	PIP5K1A	chr1	151197950	151249536	rs150990548:151285823:G:A	151313347	151313347	0	3.78e-09	8.27228	1.37242
ENSG00000159352	PSMD4	chr1	151254704	151267479	rs28730723:151144057:C:T	151171581	151171581	0	5.08e-06	1.47551	0.319097
ENSG00000143416	SELENBP1	chr1	151364303	151372733	1:151615430:G:GTTTTA	151642954	151642954	0	8.24e-06	1.01834	0.225423
ENSG00000143442	POGZ	chr1	151402725	151459465	rs3072911:151369248:GCTTT:G	151396772	151396776	0	4.76e-14	8.51141	1.08863
ENSG00000143376	SNX27	chr1	151612066	151699091	rs17641780:151659071:A:G	151686595	151686595	0	3.38e-19	3.64704	0.386786
ENSG00000178796	RIIAD1	chr1	151710434	151729805	rs949969	151820338	151820338	0	1.01e-10	-0.591836	0.0891134
ENSG00000178796	RIIAD1	chr1	151710434	151729805	rs6664467:151738403:G:A	151765927	151765927	1	8.62e-05	-0.386826	0.0975124
ENSG00000143450	OAZ3	chr1	151762900	151771334	rs2298294	151728869	151728869	0	9.69e-05	0.107602	0.0273251
ENSG00000182134	TDRKH	chr1	151770108	151791416	rs7523001:151776231:C:T	151803755	151803755	0	6.2e-19	1.38734	0.148362
ENSG00000203288	RP11-98D18.9	chr1	151790805	151794402	rs33911740:151771829:A:G	151799353	151799353	0	2.58e-09	0.263408	0.0432199
ENSG00000213171	LINGO4	chr1	151800265	151806154	rs939595	151811212	151811212	0	1.45e-15	-0.585284	0.0703958
ENSG00000213171	LINGO4	chr1	151800265	151806154	rs6690942	151657482	151657482	1	1.46e-07	0.559327	0.104484
ENSG00000213171	LINGO4	chr1	151800265	151806154	rs74490690:151706602:G:A	151734126	151734126	2	9.09e-07	-0.565146	0.113292
ENSG00000159445	THEM4	chr1	151873585	151909808	rs79597994:151803047:C:T	151830571	151830571	0	5.68e-05	5.39079	1.32469
ENSG00000197747	S100A10	chr1	151982916	151994390	rs12566232:151839838:A:C	151867362	151867362	0	1.38e-16	-0.645451	0.0747322
ENSG00000197747	S100A10	chr1	151982916	151994390	rs113812695:152920182:C:T	152947706	152947706	1	5.31e-05	-0.686307	0.167973
ENSG00000237975	FLG-AS1	chr1	152168126	152445456	rs34372395:152167407:A:G	152194931	152194931	0	1.96e-43	1.03491	0.0661232
ENSG00000237975	FLG-AS1	chr1	152168126	152445456	rs150461488:152236681:C:T	152264205	152264205	1	2.14e-22	-0.917122	0.0886392
ENSG00000237975	FLG-AS1	chr1	152168126	152445456	rs201463788:152186490:C:T	152214014	152214014	2	2.45e-10	0.890921	0.137152
ENSG00000143546	S100A8	chr1	153390033	153391188	rs200733667:152589240:G:A	152616764	152616764	0	3.2e-09	2.57851	0.425721
ENSG00000188643	S100A16	chr1	153606887	153613145	rs9700179:153585584:G:A	153613108	153613108	0	1.31e-08	0.76538	0.131836
ENSG00000189171	S100A13	chr1	153618788	153631360	rs142102043:153579049:CAA:C	153606573	153606575	0	5.25e-18	1.41224	0.155651
ENSG00000271853	RP1-178F15.5	chr1	153626333	153634340	rs59588947:153593635:A:AT	153621159	153621159	0	1.52e-12	-0.189597	0.02596
ENSG00000272030	RP1-178F15.4	chr1	153631439	153634397	rs3806234:153631071:G:A	153658595	153658595	0	7.57e-06	-0.109683	0.0241787
ENSG00000198837	DENND4B	chr1	153929502	153946696	rs113191295:153912623:G:A	153940147	153940147	0	8.15e-19	12.3464	1.32532
ENSG00000143578	CREB3L4	chr1	153967535	153974363	rs6661009:153940739:A:C	153968263	153968263	0	3.98e-13	0.690616	0.0920095
ENSG00000143552	NUP210L	chr1	153992686	154155116	rs41305088:154178724:C:A	154206248	154206248	0	1.1e-24	2.18254	0.198858
ENSG00000143569	UBAP2L	chr1	154220180	154271510	rs6667222:154253661:A:C	154281185	154281185	0	2.19e-05	2.31318	0.53855
ENSG00000143575	HAX1	chr1	154272512	154275875	rs376087832:154253231:GT:G	154280755	154280756	0	4.23e-05	1.32251	0.319426
ENSG00000160716	CHRNB2	chr1	154567782	154580026	rs73001418:154585594:T:A	154613118	154613118	0	2.67e-16	-4.15431	0.486026
ENSG00000163354	DCST2	chr1	155018521	155033781	rs11264297:155008973:T:C	155036497	155036497	0	7.75e-17	-4.9178	0.564282
ENSG00000163357	DCST1	chr1	155033825	155050930	rs11264298:155009258:G:A	155036782	155036782	0	2.98e-06	0.721816	0.152297
ENSG00000143537	ADAM15	chr1	155050567	155062775	rs11264298:155009258:G:A	155036782	155036782	0	5.48e-10	0.445563	0.0700479
ENSG00000143537	ADAM15	chr1	155050567	155062775	rs45444697:155034632:C:G	155062156	155062156	1	1.89e-05	-0.372286	0.0859985
ENSG00000169241	SLC50A1	chr1	155135345	155138857	rs2075571:155174106:C:T	155204315	155204315	0	5.37e-06	0.324968	0.0704583
ENSG00000169241	SLC50A1	chr1	155135345	155138857	rs59482594:155836855:C:CT	155867064	155867064	1	6.68e-05	0.46	0.114146
ENSG00000163463	KRTCAP2	chr1	155169409	155173475	1:154617961:C:T	154645485	154645485	0	5.41e-06	-0.792287	0.171843
ENSG00000185499	MUC1	chr1	155185825	155192916	rs12134456:155722506:C:G	155752715	155752715	0	7.96e-07	-0.228919	0.0456417
ENSG00000169231	THBS3	chr1	155195589	155209051	rs760077:155178782:A:T	155208991	155208991	0	2.14e-10	0.459524	0.0705009
ENSG00000169231	THBS3	chr1	155195589	155209051	rs58881636:155640466:CT:C	155670675	155670676	1	1.67e-05	0.331721	0.0761244
ENSG00000173171	MTX1	chr1	155208700	155213824	rs71077958:154562629:C:A	154590153	154590153	0	1.74e-05	-0.52358	0.12042
ENSG00000176444	CLK2	chr1	155262869	155278491	rs151107921:154892388:G:A	154919912	154919912	0	2.28e-05	1.59782	0.372786
ENSG00000160752	FDPS	chr1	155308749	155320666	rs35556344:155280104:C:CT	155310313	155310313	0	3.34e-10	-3.42766	0.531888
ENSG00000225855	RUSC1-AS1	chr1	155316864	155324176	rs6692661:154839793:C:A	154867317	154867317	0	4.07e-06	-0.916654	0.19619
ENSG00000116539	ASH1L	chr1	155335269	155562807	rs6695119:155739430:C:T	155769639	155769639	0	5.57e-05	9.45407	2.32054
ENSG00000125459	MSTO1	chr1	155610206	155614967	rs6665227:155710460:T:C	155740669	155740669	0	2.82e-08	1.02973	0.181795
ENSG00000163374	YY1AP1	chr1	155659444	155689000	rs4421576:155142210:A:G	155169734	155169734	0	1.16e-06	-2.23159	0.451842
ENSG00000132676	DAP3	chr1	155687961	155739010	rs12039893:155614815:A:C	155645024	155645024	0	1.47e-14	-3.72214	0.466003
ENSG00000203761	MSTO2P	chr1	155745830	155750137	rs67550672:155354272:GT:G	155384481	155384482	0	2.39e-05	-0.404808	0.0946817
ENSG00000116580	GON4L	chr1	155749663	155859400	rs72710215:156273798:C:A	156304007	156304007	0	1.18e-05	0.946006	0.213201
ENSG00000116580	GON4L	chr1	155749663	155859400	exm105764	155133751	155133751	1	9.87e-06	0.328704	0.0734168
ENSG00000143622	RIT1	chr1	155897809	155911404	rs78681289:155860611:G:T	155890820	155890820	0	1.28e-07	-1.23437	0.229526
ENSG00000196189	SEMA4A	chr1	156147367	156177752	rs6670333:156153535:T:A	156183744	156183744	0	3.73e-17	0.686034	0.077841
ENSG00000160785	SLC25A44	chr1	156193933	156212796	rs2072499	156199819	156199819	0	2.96e-17	-2.27981	0.257773
ENSG00000242252	BGLAP	chr1	156241963	156243321	rs116132935:157064296:A:G	157094504	157094504	0	2.23e-05	0.436641	0.101748
ENSG00000160781	PAQR6	chr1	156243322	156248117	rs933489	156265329	156265329	0	8.39e-40	-2.905	0.19644
ENSG00000198952	SMG5	chr1	156249225	156282825	rs933489	156265329	156265329	0	1.2e-21	-6.16661	0.608356
ENSG00000198715	GLMP	chr1	156290090	156295689	rs144991356:156245918:CT:C	156276127	156276128	0	3.19e-08	-0.438129	0.0776635
ENSG00000163468	CCT3	chr1	156308969	156367873	rs12118894:156552711:C:G	156582919	156582919	0	8.32e-06	-5.55675	1.2306
ENSG00000163382	NAXE	chr1	156591763	156594299	rs4661188	156590710	156590710	0	2.57e-21	1.60455	0.159777
ENSG00000280316	AL365181.1	chr1	156597174	156599410	rs4661186:156551092:G:T	156581300	156581300	0	2.39e-05	0.912307	0.213415
ENSG00000143320	CRABP2	chr1	156699607	156705816	exm108766	156285657	156285657	0	1.93e-05	1.99865	0.462103
ENSG00000143303	RRNAD1	chr1	156728443	156736960	rs147665113:156695000:C:T	156725208	156725208	0	2.17e-07	-0.876714	0.166191
ENSG00000027869	SH2D2A	chr1	156806244	156816862	rs2150906:156785356:T:C	156815564	156815564	0	1.84e-19	1.2643	0.132985
ENSG00000198400	NTRK1	chr1	156815641	156881850	rs7546838:156785771:A:G	156815979	156815979	0	5e-14	-0.525823	0.0673149
ENSG00000198400	NTRK1	chr1	156815641	156881850	rs2150906:156785356:T:C	156815564	156815564	1	1.1e-07	0.818784	0.151409
ENSG00000187800	PEAR1	chr1	156893699	156916434	rs2148906:156797301:A:G	156827509	156827509	0	8.91e-07	-0.194369	0.0389332
ENSG00000132694	ARHGEF11	chr1	156934841	157045370	rs3831269:156916640:G:GCCTATCCCTT	156946848	156946848	0	1.77e-13	-5.16194	0.67687
ENSG00000183853	KIRREL	chr1	157993274	158100262	rs66716637:158026348:C:T	158056558	158056558	0	2.2e-10	1.08504	0.166578
ENSG00000183853	KIRREL	chr1	157993274	158100262	rs1972216	158030950	158030950	1	5.68e-09	-0.627914	0.105441
ENSG00000163563	MNDA	chr1	158831318	158849506	rs857791	158819207	158819207	0	1.28e-42	-0.863134	0.0558349
ENSG00000163563	MNDA	chr1	158831318	158849506	rs75344404:158861068:A:G	158891278	158891278	1	3.87e-05	0.339905	0.0816758
ENSG00000213088	ACKR1	chr1	159203308	159206500	rs863016:159203933:A:G	159234143	159234143	0	4.05e-06	1.59274	0.340811
ENSG00000188004	C1orf204	chr1	159834475	159855347	rs2501338:159822670:A:T	159852880	159852880	0	1.36e-12	-0.608225	0.0830782
ENSG00000272668	RP11-190A12.8	chr1	159866955	159867685	rs34413912:159826648:C:T	159856858	159856858	0	1.2e-51	0.967582	0.0550788
ENSG00000085552	IGSF9	chr1	159927040	159945604	rs10752634:159905268:T:C	159935478	159935478	0	4.67e-11	14.9774	2.21316
ENSG00000162728	KCNJ9	chr1	160081571	160090563	rs56022217:160118612:G:T	160148822	160148822	0	7.86e-06	-1.33193	0.294153
ENSG00000162729	IGSF8	chr1	160091341	160098943	rs11265329:160095446:C:T	160125656	160125656	0	2.58e-07	1.13054	0.215682
ENSG00000132681	ATP1A4	chr1	160151571	160186977	rs7526939:160150756:G:A	160180966	160180966	0	5.2e-08	-0.388122	0.0699318
ENSG00000132681	ATP1A4	chr1	160151571	160186977	rs72713608:159246874:G:T	159277084	159277084	1	1.95e-05	-1.08335	0.250633
ENSG00000143318	CASQ1	chr1	160190557	160201886	rs200641037:160164082:G:A	160194292	160194292	0	2.07e-07	-5.98644	1.1327
ENSG00000122218	COPA	chr1	160289274	160343400	rs4656892:160220213:A:G	160250423	160250423	0	3.29e-15	5.46271	0.666197
ENSG00000171786	NHLH1	chr1	160367068	160372848	rs2038780:160317619:C:T	160347829	160347829	0	1.1e-05	0.146835	0.0329803
ENSG00000162738	VANGL2	chr1	160400587	160428678	rs12140361:161321998:T:C	161352208	161352208	0	7.64e-06	2.55079	0.562529
ENSG00000158769	F11R	chr1	160995212	161021348	rs34339899:160988146:C:G	161018356	161018356	0	5.77e-30	-0.791008	0.0639858
ENSG00000158769	F11R	chr1	160995212	161021348	rs78020028:160932172:G:C	160962382	160962382	1	2.95e-05	-0.861267	0.203825
ENSG00000215845	TSTD1	chr1	161037632	161038990	rs6427573:161013711:G:A	161043921	161043921	0	7.76e-21	0.927813	0.0936678
ENSG00000143256	PFDN2	chr1	161100557	161118111	1:161517993:T:C	161548203	161548203	0	6.96e-07	2.0151	0.399597
ENSG00000158793	NIT1	chr1	161118087	161125445	rs41270013:161070250:C:A	161100460	161100460	0	4.07e-11	1.44206	0.212392
ENSG00000158793	NIT1	chr1	161118087	161125445	rs3813619:161143801:G:A	161174011	161174011	1	1.66e-06	-0.650367	0.133737
ENSG00000143224	PPOX	chr1	161166411	161178013	rs78897192:161595080:A:T	161625290	161625290	0	4.29e-05	0.938536	0.226881
ENSG00000158864	NDUFS2	chr1	161197105	161214395	rs35630547:161166723:G:T	161196933	161196933	0	2.17e-19	-1.02819	0.108395
ENSG00000158864	NDUFS2	chr1	161197105	161214395	1:161186205:T:C	161216415	161216415	1	1.39e-05	-0.731398	0.166255
ENSG00000158882	TOMM40L	chr1	161225940	161230744	rs5082	161223893	161223893	0	7.47e-13	-1.60346	0.216345
ENSG00000248485	PCP4L1	chr1	161258728	161285450	rs4636483:161256812:A:G	161287022	161287022	0	4.45e-36	0.782122	0.0563181
ENSG00000248485	PCP4L1	chr1	161258728	161285450	rs12041273:161217657:C:T	161247867	161247867	1	1.52e-05	-0.420992	0.0961379
ENSG00000143252	SDHC	chr1	161314258	161375340	rs55898518:161330241:G:C	161360451	161360451	0	1.17e-31	-1.54201	0.120543
ENSG00000143252	SDHC	chr1	161314258	161375340	rs16832847:161313678:A:C	161343888	161343888	1	1.04e-11	-0.754348	0.107674
ENSG00000143252	SDHC	chr1	161314258	161375340	rs143434937:160737079:GGAGAGAGA:G	160767289	160767297	2	7.2e-06	-0.881563	0.193851
ENSG00000198929	NOS1AP	chr1	162069775	162370475	rs72715967:162131072:G:A	162161282	162161282	0	1.44e-16	-0.663331	0.0768474
ENSG00000198929	NOS1AP	chr1	162069775	162370475	rs164186:162346172:C:G	162376382	162376382	1	4.89e-05	-1.08555	0.264419
ENSG00000239887	C1orf226	chr1	162366909	162386818	rs72715967:162131072:G:A	162161282	162161282	0	4.32e-14	-0.61042	0.0779332
ENSG00000239887	C1orf226	chr1	162366909	162386818	rs35839449:162060159:T:TA	162090369	162090369	1	1.05e-06	-0.364525	0.0735252
ENSG00000239887	C1orf226	chr1	162366909	162386818	rs7521206:162330927:C:G	162361137	162361137	2	3.21e-05	0.309266	0.0735325
ENSG00000232995	RGS5	chr1	163244506	163321894	rs11809749:163279745:C:G	163309955	163309955	0	4.72e-12	-0.320924	0.0450118
ENSG00000143198	MGST3	chr1	165630862	165661796	rs10733045:165597311:G:T	165628074	165628074	0	6.03e-25	-0.706499	0.0639583
ENSG00000143198	MGST3	chr1	165630862	165661796	rs60631947:165617869:C:T	165648632	165648632	1	2.18e-11	0.915936	0.132954
ENSG00000143198	MGST3	chr1	165630862	165661796	rs148053085:165640199:A:AC	165670962	165670962	2	7.77e-07	-0.358448	0.0713974
ENSG00000143198	MGST3	chr1	165630862	165661796	rs370790083:165587953:AAAAC:A	165618716	165618720	3	1.38e-06	-0.959033	0.195632
ENSG00000143149	ALDH9A1	chr1	165662217	165698863	rs4646888:165654498:A:G	165685261	165685261	0	2.46e-16	-0.624153	0.0729285
ENSG00000143149	ALDH9A1	chr1	165662217	165698863	rs12742656:165644502:A:C	165675265	165675265	1	1.71e-05	-0.332427	0.0763716
ENSG00000224358	RP11-466F5.8	chr1	165768930	165775176	rs11430311:165687073:A:AT	165717836	165717836	0	3.31e-15	-0.40438	0.0493215
ENSG00000143179	UCK2	chr1	165827532	165911618	rs10918308:165872905:C:A	165903668	165903668	0	6.59e-12	0.685117	0.0967999
ENSG00000143179	UCK2	chr1	165827532	165911618	rs6143465:165538453:CA:C	165569216	165569217	1	4.3e-05	-0.466925	0.112876
ENSG00000143157	POGK	chr1	166839448	166856344	1:166808933:GCGC:G	166839696	166839699	0	6.1e-25	-5.16584	0.46771
ENSG00000152382	TADA1	chr1	166856511	166876327	rs2049910:166832125:C:T	166862888	166862888	0	1.05e-11	-0.593861	0.0847764
ENSG00000152382	TADA1	chr1	166856511	166876327	rs74900874:166851352:T:G	166882115	166882115	1	1.25e-06	-0.961986	0.195448
ENSG00000143195	ILDR2	chr1	166895712	166975482	rs2294220:166884129:A:C	166914892	166914892	0	2.55e-09	5.59436	0.917593
ENSG00000143194	MAEL	chr1	166975583	167022214	rs7551881:166955312:G:T	166986075	166986075	0	3.77e-67	-1.02923	0.0487079
ENSG00000143194	MAEL	chr1	166975583	167022214	rs56310651:166951097:C:T	166981860	166981860	1	5.88e-15	-1.22437	0.150818
ENSG00000143194	MAEL	chr1	166975583	167022214	rs7555095:167003539:A:C	167034302	167034302	2	5.51e-05	-0.53698	0.13172
ENSG00000198842	DUSP27	chr1	167094046	167129165	rs10918634:167091899:A:T	167122662	167122662	0	5.94e-26	0.794897	0.0702449
ENSG00000198842	DUSP27	chr1	167094046	167129165	rs10800284:167075478:C:T	167106241	167106241	1	2.27e-05	0.50699	0.118272
ENSG00000143190	POU2F1	chr1	167220830	167427345	rs10918673:167235524:C:T	167266287	167266287	0	2.52e-06	-5.19614	1.08814
ENSG00000198821	CD247	chr1	167430641	167518610	rs7527714:167503586:C:T	167534349	167534349	0	3.97e-05	0.14102	0.0339373
ENSG00000143162	CREG1	chr1	167529678	167553767	rs57323848:167507471:G:A	167538234	167538234	0	2.33e-45	-1.15023	0.0714238
ENSG00000143162	CREG1	chr1	167529678	167553767	rs10489191:167505895:T:C	167536658	167536658	1	7.48e-06	-0.507128	0.111724
ENSG00000198771	RCSD1	chr1	167630094	167706249	1:167596606:C:CTTTTTTTTTTTTTTT	167627369	167627369	0	3.26e-05	0.168779	0.0401615
ENSG00000143158	MPC2	chr1	167916730	167937040	rs61423719:167972324:A:G	168003086	168003086	0	3.13e-06	-1.73332	0.366547
ENSG00000143155	TIPRL	chr1	168178934	168202114	rs7552213:168137725:T:G	168168487	168168487	0	5.29e-08	-1.00468	0.181124
ENSG00000143155	TIPRL	chr1	168178934	168202114	rs111606479:167895627:T:C	167926389	167926389	1	3.69e-05	-0.635884	0.152375
ENSG00000143153	ATP1B1	chr1	169105698	169132722	rs10919062:169088947:T:C	169119709	169119709	0	1.81e-05	11.5494	2.66131
ENSG00000143156	NME7	chr1	169132532	169367967	1:169256191:C:CA	169286953	169286953	0	4.71e-23	0.950116	0.0902364
ENSG00000143156	NME7	chr1	169132532	169367967	rs34127028:169220436:T:C	169251198	169251198	1	1.6e-05	0.952429	0.21806
ENSG00000117477	CCDC181	chr1	169394871	169460669	rs1080266	169207352	169207352	0	5.78e-05	2.07205	0.509741
ENSG00000213062	RP1-206D15.6	chr1	169486077	169486986	rs72040890:169410169:TA:T	169440931	169440932	0	3.2e-05	-0.150478	0.0357736
ENSG00000000460	C1orf112	chr1	169662008	169854080	rs17529513:169798745:C:G	169829604	169829604	0	9.99e-54	-1.04729	0.0580288
ENSG00000000460	C1orf112	chr1	169662008	169854080	rs10800469:169706083:A:G	169736942	169736942	1	6.5e-06	-0.350592	0.0767116
ENSG00000000460	C1orf112	chr1	169662008	169854080	1:169880607:AT:A	169911466	169911467	2	9.73e-06	-0.378666	0.0845157
ENSG00000171806	METTL18	chr1	169792530	169794966	rs12132222:169758564:A:G	169789423	169789423	0	3.1e-32	-1.21574	0.093974
ENSG00000171806	METTL18	chr1	169792530	169794966	rs3766038:169089588:T:A	169120350	169120350	1	4.67e-05	-0.321519	0.0781022
ENSG00000000457	SCYL3	chr1	169849632	169894267	rs79593867:169749390:C:A	169780249	169780249	0	5.96e-08	-0.600264	0.108658
ENSG00000000457	SCYL3	chr1	169849632	169894267	rs72709770:170463027:C:T	170493886	170493886	1	3.74e-05	0.512252	0.122848
ENSG00000120370	GORAB	chr1	170532130	170553446	rs112197426:170501521:AC:A	170532380	170532381	0	3.64e-25	-1.93732	0.174449
ENSG00000094963	FMO2	chr1	171185209	171211230	rs145126383:171130598:CACACA:C	171161459	171161464	0	3.8e-10	-1.02669	0.159861
ENSG00000117533	VAMP4	chr1	171700161	171742247	rs78075821:171724645:C:A	171755505	171755505	0	2.39e-19	0.777444	0.0820663
ENSG00000117533	VAMP4	chr1	171700161	171742247	rs372923542:171627178:ATGTG:A	171658038	171658042	1	3.13e-05	-0.453551	0.107674
ENSG00000010165	METTL13	chr1	171781665	171814023	rs6681322:171773871:G:A	171804731	171804731	0	7.3e-07	0.429359	0.0853075
ENSG00000010165	METTL13	chr1	171781665	171814023	rs723959:170842059:G:A	170872918	170872918	1	4.69e-05	1.12282	0.272826
ENSG00000135845	PIGC	chr1	172370190	172444086	rs10752946:172376632:C:T	172407492	172407492	0	7.78e-09	-0.750471	0.127218
ENSG00000117586	TNFSF4	chr1	173183735	173207313	rs5778766:173428131:TA:T	173458992	173458993	0	1.95e-12	0.407147	0.0560349
ENSG00000117592	PRDX6	chr1	173477267	173488807	rs12089930:173569875:G:A	173600736	173600736	0	1.55e-08	-5.86957	1.01646
ENSG00000162753	SLC9C2	chr1	173500465	173603094	rs11450962:174020269:G:GA	174051131	174051131	0	6.82e-22	0.458719	0.0449494
ENSG00000183831	ANKRD45	chr1	173609562	173669862	rs61828917:173580303:C:T	173611164	173611164	0	4.98e-29	-1.06985	0.0882574
ENSG00000120334	CENPL	chr1	173799551	173824720	rs116123447:173738026:G:A	173768887	173768887	0	7.77e-05	-0.575039	0.14402
ENSG00000117593	DARS2	chr1	173824504	173858546	rs74514971:173729431:TACTC:T	173760292	173760296	0	2.11e-25	-1.47541	0.1321
ENSG00000270084	GAS5-AS1	chr1	173863249	173863941	rs373723052:173708785:CTTTT:C	173739646	173739650	0	2.01e-14	-0.158725	0.0199837
ENSG00000234741	GAS5	chr1	173863901	173868882	rs139642051:174056358:G:A	174087220	174087220	0	1.12e-12	8.74243	1.18943
ENSG00000117601	SERPINC1	chr1	173903805	173917378	rs72151707:173924401:TACA:T	173955263	173955266	0	3.8e-31	0.783025	0.061838
ENSG00000152061	RABGAP1L	chr1	174159411	174995308	rs58431458:174132749:TA:T	174163611	174163612	0	3.5e-21	3.80503	0.380338
ENSG00000120333	MRPS14	chr1	175010790	175023425	rs71117583:174821953:C:CA	174852815	174852815	0	3.34e-06	0.928809	0.196996
ENSG00000143207	RFWD2	chr1	175944832	176207493	rs6680839:175902596:C:T	175933460	175933460	0	2.19e-16	-1.71166	0.199627
ENSG00000120341	SEC16B	chr1	177923957	177984303	rs6682862	177969302	177969302	0	7.45e-18	2.71887	0.301185
ENSG00000254154	RP4-798P15.3	chr1	177928789	178038007	rs79371453:177966389:C:T	177997254	177997254	0	1.37e-12	1.02865	0.140536
ENSG00000254154	RP4-798P15.3	chr1	177928789	178038007	rs16828594:177929379:C:T	177960244	177960244	1	1.59e-13	0.743182	0.0972443
ENSG00000254154	RP4-798P15.3	chr1	177928789	178038007	rs10913487:177968239:C:G	177999104	177999104	2	7.68e-06	0.55364	0.122132
ENSG00000242193	RP11-568K15.1	chr1	178006137	178037950	rs12565045:177972973:G:A	178003838	178003838	0	9.23e-13	-0.678195	0.0919007
ENSG00000242193	RP11-568K15.1	chr1	178006137	178037950	rs200528330:178006221:C:T	178037086	178037086	1	1.38e-07	0.481989	0.0898662
ENSG00000242193	RP11-568K15.1	chr1	178006137	178037950	rs16852358	178022120	178022120	2	6.08e-06	0.960502	0.209501
ENSG00000116191	RALGPS2	chr1	178725148	178921841	rs2476564:178626340:A:G	178657205	178657205	0	1.3e-06	8.82001	1.79461
ENSG00000116199	FAM20B	chr1	179025805	179076562	rs3766626:179043539:T:G	179074404	179074404	0	1.2e-39	11.635	0.788782
ENSG00000186283	TOR3A	chr1	179081378	179098023	rs1128952	179095990	179095990	0	1.15e-06	-0.499064	0.10102
ENSG00000143322	ABL2	chr1	179099328	179229684	rs12737798:179457770:C:T	179488635	179488635	0	4.22e-06	-2.62041	0.561771
ENSG00000057252	SOAT1	chr1	179293715	179358680	rs10753191	179343617	179343617	0	2.84e-06	1.49669	0.315085
ENSG00000162779	AXDND1	chr1	179365721	179554735	rs16853998:179334917:G:C	179365782	179365782	0	1.22e-15	0.546217	0.0655054
ENSG00000162779	AXDND1	chr1	179365721	179554735	rs35129223:179335499:C:CT	179366364	179366364	1	2.46e-06	0.371158	0.0776363
ENSG00000162779	AXDND1	chr1	179365721	179554735	rs138809885:179437327:C:T	179468192	179468192	2	7.36e-09	1.93665	0.327744
ENSG00000162779	AXDND1	chr1	179365721	179554735	rs17369102:179335138:A:G	179366003	179366003	3	3.4e-06	-0.390131	0.0828047
ENSG00000162782	TDRD5	chr1	179591614	179691272	rs76644806:179561154:C:T	179592019	179592019	0	1.88e-63	0.579872	0.0285906
ENSG00000143340	FAM163A	chr1	179743164	179816198	rs2487737:179705344:A:G	179736209	179736209	0	6.75e-06	0.26825	0.0588051
ENSG00000143337	TOR1AIP1	chr1	179882043	179925000	rs1144575:179847402:T:G	179878267	179878267	0	1.05e-06	-0.387019	0.0780458
ENSG00000143337	TOR1AIP1	chr1	179882043	179925000	rs12145358:179676274:A:C	179707139	179707139	1	7.13e-05	0.701268	0.174708
ENSG00000121454	LHX4	chr1	180230287	180278982	rs74695312:180425680:T:C	180456545	180456545	0	5.04e-08	6.6704	1.20062
ENSG00000143324	XPR1	chr1	180632005	180890251	rs72707408:180817726:A:G	180848590	180848590	0	7.37e-06	1.68197	0.37029
ENSG00000135835	KIAA1614	chr1	180913155	180951614	rs12026811:180935975:G:A	180966839	180966839	0	3.16e-05	-5.06398	1.20291
ENSG00000135823	STX6	chr1	180972713	181023121	rs10494536	181006729	181006729	0	4.56e-13	-1.55553	0.207802
ENSG00000198216	CACNA1E	chr1	181413103	181808084	rs6701266:181264330:T:C	181295194	181295194	0	2.48e-06	0.333676	0.0698231
ENSG00000198216	CACNA1E	chr1	181413103	181808084	rs2609473:181335507:G:T	181366371	181366371	1	1.83e-05	0.313987	0.0723984
ENSG00000135828	RNASEL	chr1	182573635	182589256	rs4652733:182567440:G:A	182598305	182598305	0	5.34e-57	3.7416	0.199016
ENSG00000135824	RGS8	chr1	182641817	182684576	rs76816476:183230519:C:T	183261384	183261384	0	6.88e-05	4.97666	1.23717
ENSG00000162704	ARPC5	chr1	183620847	183635757	rs375178930:183586329:G:A	183617194	183617194	0	5.25e-08	1.01273	0.182536
ENSG00000198756	COLGALT2	chr1	183929855	184037729	rs12564008:183910793:T:C	183941659	183941659	0	2.76e-10	0.471564	0.072818
ENSG00000198756	COLGALT2	chr1	183929855	184037729	rs16822334:183989315:A:G	184020181	184020181	1	5.38e-09	0.533635	0.0894612
ENSG00000198756	COLGALT2	chr1	183929855	184037729	rs1925043:183207603:T:C	183238468	183238468	2	3.96e-05	-0.386903	0.0930955
ENSG00000198860	TSEN15	chr1	184051678	184074212	rs1327123:184014593:G:C	184045459	184045459	0	1.12e-30	1.83515	0.146306
ENSG00000116667	C1orf21	chr1	184387059	184629020	rs10911622:184601607:C:T	184632473	184632473	0	1.3e-05	-2.17097	0.491695
ENSG00000116406	EDEM3	chr1	184690232	184754913	rs139480614:184717582:CA:C	184748448	184748449	0	1.8e-10	-2.35103	0.359121
ENSG00000135842	FAM129A	chr1	184790725	184974550	rs73046798:184619002:C:T	184649868	184649868	0	1.88e-06	2.50488	0.517792
ENSG00000121486	TRMT1L	chr1	185118099	185157072	rs111301848:185026937:GA:G	185057805	185057806	0	3.13e-06	-1.21552	0.257039
ENSG00000116679	IVNS1ABP	chr1	185296389	185317329	rs4326589:184358996:C:T	184389862	184389862	0	2.22e-05	-3.03627	0.707303
ENSG00000116703	PDC	chr1	186443567	186461122	rs138592085:186437836:T:TTACTC	186468704	186468704	0	1.13e-18	63.027	6.79688
ENSG00000228238	GS1-304P7.2	chr1	186578280	186579299	rs112214529:186797016:A:G	186827884	186827884	0	8.76e-06	-0.352718	0.0783126
ENSG00000116711	PLA2G4A	chr1	186828954	186988981	rs61377388:186938875:AT:A	186969743	186969744	0	1.19e-09	-0.352253	0.0565542
ENSG00000116741	RGS2	chr1	192809040	192812283	rs6428122:192588938:G:A	192619808	192619808	0	6.45e-09	-0.419118	0.0706462
ENSG00000116741	RGS2	chr1	192809040	192812283	rs4658064:192618028:G:C	192648898	192648898	1	8.78e-06	-0.77087	0.171172
ENSG00000272579	RP11-101E13.5	chr1	193090867	193091556	rs72088041:193162910:AGTGTGT:A	193193780	193193786	0	1.8e-06	0.133194	0.0274857
ENSG00000023572	GLRX2	chr1	193096469	193106114	rs4657845:193072784:T:A	193103654	193103654	0	9.98e-06	0.223802	0.0500133
ENSG00000162630	B3GALT2	chr1	193179046	193186654	rs78759515:192609864:T:G	192640734	192640734	0	2.73e-05	1.268	0.298779
ENSG00000000971	CFH	chr1	196651879	196747504	rs2821106:197384285:T:C	197415155	197415155	0	2.21e-05	2.35689	0.549004
ENSG00000213047	DENND1B	chr1	197504749	197775696	rs35856931:197674778:TA:T	197705648	197705649	0	8.2e-05	1.03018	0.258879
ENSG00000116833	NR5A2	chr1	200027603	200177424	rs144911451:200042450:TTA:T	200073322	200073324	0	1.49e-06	-0.0990442	0.0202719
ENSG00000118197	DDX59	chr1	200623897	200669969	rs34428088:200619031:C:T	200649903	200649903	0	2.92e-28	-0.711621	0.0596837
ENSG00000118197	DDX59	chr1	200623897	200669969	rs114238836:200634625:G:A	200665497	200665497	1	1.11e-05	0.592682	0.133173
ENSG00000118200	CAMSAP2	chr1	200739559	200860704	rs10920035:200789191:T:A	200820063	200820063	0	4.83e-06	2.36256	0.509671
ENSG00000163362	C1orf106	chr1	200891049	200915735	rs2271019:200861003:A:G	200891875	200891875	0	1.58e-05	0.317566	0.072659
ENSG00000163362	C1orf106	chr1	200891049	200915735	rs1096598:201126552:T:C	201157424	201157424	1	2.52e-05	0.832141	0.195214
ENSG00000081248	CACNA1S	chr1	201039513	201112566	rs2057580:201087615:G:A	201118487	201118487	0	4.11e-15	-1.6179	0.198067
ENSG00000116857	TMEM9	chr1	201134773	201171574	rs10920133:201116513:A:C	201147385	201147385	0	1.28e-12	-0.666193	0.0908865
ENSG00000116857	TMEM9	chr1	201134773	201171574	rs77762614:201080110:C:T	201110982	201110982	1	8e-06	0.767354	0.169613
ENSG00000081277	PKP1	chr1	201283453	201332993	rs56287879:201237953:C:A	201268825	201268825	0	3.73e-33	-1.16892	0.088779
ENSG00000081277	PKP1	chr1	201283453	201332993	rs57522319:201235069:A:C	201265941	201265941	1	3.29e-16	0.751188	0.0881774
ENSG00000118194	TNNT2	chr1	201359009	201377762	rs57628212:201349670:G:A	201380542	201380542	0	1.99e-12	0.597392	0.0822578
ENSG00000198700	IPO9	chr1	201829142	201884294	rs76577526:201820094:G:A	201850966	201850966	0	6.95e-10	-8.1139	1.28373
ENSG00000198892	SHISA4	chr1	201888681	201892306	rs4025034:201871833:A:C	201902705	201902705	0	5.38e-18	-1.09912	0.121182
ENSG00000176393	RNPEP	chr1	201982373	202006147	rs11810017:201950949:T:C	201981821	201981821	0	7.15e-12	0.504092	0.0713513
ENSG00000176393	RNPEP	chr1	201982373	202006147	rs200907052:201937067:AG:A	201967939	201967940	1	2.92e-08	-0.956766	0.169095
ENSG00000234678	RP11-465N4.4	chr1	202000095	202010353	rs147166610:202294658:A:ATATTTATT	202325530	202325530	0	1.34e-05	-0.131196	0.0297613
ENSG00000170075	GPR37L1	chr1	202122859	202133592	rs4463734:202083061:A:C	202113933	202113933	0	2.81e-10	-0.600309	0.0927451
ENSG00000170075	GPR37L1	chr1	202122859	202133592	rs11588918:202095560:G:A	202126432	202126432	1	4.56e-06	0.364146	0.0783497
ENSG00000133067	LGR6	chr1	202193902	202319781	rs6663303:202177926:C:T	202208798	202208798	0	2.27e-10	-0.156879	0.0241036
ENSG00000077152	UBE2T	chr1	202331658	202341980	rs34700182:202185788:T:TC	202216660	202216660	0	4.87e-05	0.368268	0.0896797
ENSG00000117139	KDM5B	chr1	202724492	202809470	rs59584876:202794330:GA:G	202825202	202825203	0	6.75e-14	0.897038	0.115481
ENSG00000117139	KDM5B	chr1	202724492	202809470	rs12132992:202761823:C:G	202792695	202792695	1	4.12e-08	-0.439787	0.0786208
ENSG00000117139	KDM5B	chr1	202724492	202809470	rs28419585:201968263:T:C	201999135	201999135	2	2.26e-06	-0.348785	0.0726908
ENSG00000228288	PCAT6	chr1	202810955	202812156	rs2275895	202811402	202811402	0	1.19e-28	-0.908421	0.0755465
ENSG00000228288	PCAT6	chr1	202810955	202812156	rs71709459:202784592:CT:C	202815464	202815465	1	1.79e-06	0.548139	0.113065
ENSG00000184774	MGAT4EP	chr1	202820267	202827225	rs4950923:202776448:G:A	202807320	202807320	0	1.42e-17	-0.620072	0.0693404
ENSG00000234996	RP11-480I12.9	chr1	202861755	202875241	rs2298261	202857410	202857410	0	7.97e-10	0.842749	0.133829
ENSG00000117153	KLHL12	chr1	202891101	202928636	rs78337724:202909662:C:T	202940534	202940534	0	1.14e-07	-0.506668	0.0938154
ENSG00000117153	KLHL12	chr1	202891101	202928636	rs186476702:201917493:A:G	201948365	201948365	1	4.39e-05	-1.19573	0.289408
ENSG00000159348	CYB5R1	chr1	202961870	202967280	rs11380528:202933552:T:TA	202964424	202964424	0	2.39e-05	-2.82373	0.660575
ENSG00000163444	TMEM183A	chr1	203007387	203024848	rs71142584:202983752:CA:C	203014624	203014625	0	1.69e-06	-1.22972	0.253039
ENSG00000143847	PPFIA4	chr1	203026499	203078740	rs34704391:203647752:G:A	203678624	203678624	0	5.98e-06	7.29228	1.58923
ENSG00000163485	ADORA1	chr1	203090655	203167405	rs5780152:203163124:A:AAAAC	203193996	203193996	0	4.54e-05	0.937809	0.227432
ENSG00000122176	FMOD	chr1	203340629	203351489	rs16851364:203318144:G:A	203349016	203349016	0	2.77e-08	-5.67405	1.00109
ENSG00000188783	PRELP	chr1	203475829	203491352	rs6702882:203463640:G:A	203494512	203494512	0	1.63e-07	-9.00659	1.68933
ENSG00000058668	ATP2B4	chr1	203626562	203744081	rs4262605:203547692:G:A	203578564	203578564	0	3.57e-31	0.902046	0.0711989
ENSG00000058668	ATP2B4	chr1	203626562	203744081	rs56046643:203593816:C:G	203624688	203624688	1	4.06e-05	0.691377	0.166592
ENSG00000058673	ZC3H11A	chr1	203795655	203854124	rs74546279:203773280:GTT:G	203804152	203804154	0	3.04e-07	8.09395	1.55371
ENSG00000257315	ZBED6	chr1	203796310	203800558	rs12118237:203785948:C:T	203816820	203816820	0	2.28e-05	-1.75932	0.410478
ENSG00000182004	SNRPE	chr1	203861604	203870550	rs368189070:203828803:TCTC:T	203859675	203859678	0	2.64e-15	1.50773	0.183187
ENSG00000133056	PIK3C2B	chr1	204422629	204494724	rs60450179:204400157:T:C	204431029	204431029	0	1.53e-05	-2.38023	0.543761
ENSG00000198625	MDM4	chr1	204516380	204558120	rs12038102:204551407:G:A	204582279	204582279	0	1.34e-05	-2.70205	0.612861
ENSG00000184144	CNTN2	chr1	205042938	205078499	rs111581209:205910359:C:T	205941231	205941231	0	8.34e-07	1.93548	0.386627
ENSG00000174529	TMEM81	chr1	205083130	205084460	rs34138711:205054861:C:CAAA	205085733	205085733	0	6.6e-07	-0.504708	0.0998694
ENSG00000117222	RBBP5	chr1	205086143	205122015	rs35603588:204315882:C:CT	204346754	204346754	0	1.18e-05	-1.06079	0.239047
ENSG00000133059	DSTYK	chr1	205142506	205211566	rs11577406:205065733:G:T	205096605	205096605	0	9.76e-15	3.41771	0.424756
ENSG00000133069	TMCC2	chr1	205228177	205273343	rs1172113:205226288:T:C	205257160	205257160	0	2.83e-14	-3.67004	0.46494
ENSG00000163545	NUAK2	chr1	205302060	205321791	rs9793526:205320764:T:C	205351636	205351636	0	6.33e-07	-0.253729	0.0501222
ENSG00000162873	KLHDC8A	chr1	205336066	205357090	rs7530732:205321833:T:C	205352705	205352705	0	3.98e-08	-3.20029	0.571467
ENSG00000186007	LEMD1	chr1	205381379	205457091	rs1538365	205503056	205503056	0	3.79e-05	-0.117769	0.0282668
ENSG00000224717	RP11-576D8.4	chr1	205455930	205469024	rs2759282:204846772:C:T	204877644	204877644	0	5.68e-05	0.27214	0.0668756
ENSG00000174514	MFSD4A	chr1	205568886	205602918	rs11240530:205564044:A:G	205594916	205594916	0	2.85e-13	-7.86419	1.04082
ENSG00000158715	SLC45A3	chr1	205657852	205680459	rs823130:205714372:C:T	205745244	205745244	0	6.04e-09	0.402967	0.0677902
ENSG00000158715	SLC45A3	chr1	205657852	205680459	rs116426872:205585067:C:T	205615939	205615939	1	4.2e-06	-1.12679	0.241504
ENSG00000069275	NUCKS1	chr1	205712820	205750276	rs1418652:205646458:C:T	205677330	205677330	0	1.71e-09	-9.25807	1.5015
ENSG00000117280	RAB29	chr1	205767987	205775460	rs823114:205719532:G:A	205750404	205750404	0	3.58e-13	1.12432	0.149472
ENSG00000266094	RASSF5	chr1	206507531	206589448	rs34769485:206703098:C:CA	206529765	206529765	0	2.14e-08	-0.363688	0.063633
ENSG00000143486	EIF2D	chr1	206571293	206612463	rs74147415:206832659:T:G	206659314	206659314	0	3.12e-05	3.33359	0.791289
ENSG00000162889	MAPKAPK2	chr1	206684945	206734283	rs55730781:206895361:G:T	206722016	206722016	0	2.09e-08	1.78066	0.311336
ENSG00000196352	CD55	chr1	207321509	207386804	rs71909776:207489074:GCA:G	207315729	207315731	0	4.07e-22	-0.721725	0.0702874
ENSG00000196352	CD55	chr1	207321509	207386804	rs35683092:207484091:CT:C	207310746	207310747	1	4.25e-05	-0.319731	0.0772497
ENSG00000117595	IRF6	chr1	209785624	209806175	rs764093:209983331:A:G	209809986	209809986	0	8.46e-21	-0.799144	0.0807651
ENSG00000117595	IRF6	chr1	209785624	209806175	rs6660087:209939792:T:C	209766447	209766447	1	2.6e-06	-0.401926	0.0842883
ENSG00000117597	DIEXF	chr1	209828008	209857565	rs10127446:210006086:A:G	209832741	209832741	0	5.47e-06	0.373331	0.0810142
ENSG00000117597	DIEXF	chr1	209828008	209857565	rs17014039:209268696:T:C	209095351	209095351	1	3.22e-05	-0.412643	0.0981347
ENSG00000143469	SYT14	chr1	209938175	210171389	rs28630860:210043322:A:C	209869977	209869977	0	4.68e-07	-2.47638	0.483396
ENSG00000054392	HHAT	chr1	210328253	210676296	rs6693338:210569729:C:T	210396385	210396385	0	1.14e-09	-0.654002	0.10488
ENSG00000153363	LINC00467	chr1	211382804	211435333	rs111798493:211596868:A:G	211423526	211423526	0	6.85e-14	-1.42243	0.183172
ENSG00000153363	LINC00467	chr1	211382804	211435333	rs142791224:211464314:G:GT	211290972	211290972	1	1.67e-06	-0.493838	0.101568
ENSG00000153363	LINC00467	chr1	211382804	211435333	rs72749332:210695928:T:A	210522584	210522584	2	9.41e-06	-1.07235	0.23894
ENSG00000198570	RD3	chr1	211476523	211492917	rs367700286:211662675:TTTC:T	211489333	211489336	0	1.72e-09	11.804	1.91463
ENSG00000223649	RP11-359E8.3	chr1	211492256	211492917	rs10863899	211492876	211492876	0	5.18e-16	0.184037	0.0217621
ENSG00000170385	SLC30A1	chr1	211571569	211578742	1:211631097:T:A	211457755	211457755	0	2.01e-05	6.61671	1.53326
ENSG00000117650	NEK2	chr1	211658658	211675630	rs785317:211851059:G:A	211677717	211677717	0	3.21e-12	-0.283905	0.0394908
ENSG00000123684	LPGAT1	chr1	211743458	211830772	rs145922850:211932640:GT:G	211759298	211759299	0	7.29e-07	-9.80244	1.94748
ENSG00000143493	INTS7	chr1	211940400	212035542	rs2808385:212114860:T:C	211941518	211941518	0	3.57e-19	1.39543	0.148107
ENSG00000066027	PPP2R5A	chr1	212285538	212361863	rs35872305:212446322:C:T	212272980	212272980	0	1.02e-10	-0.575498	0.086676
ENSG00000066027	PPP2R5A	chr1	212285538	212361863	rs12408016:212494560:G:C	212321218	212321218	1	4.88e-09	-0.405101	0.0677167
ENSG00000065600	TMEM206	chr1	212363932	212414901	exm147155	212413978	212413978	0	6.7e-07	1.31538	0.260444
ENSG00000117691	NENF	chr1	212432888	212446379	rs141898885:212609873:G:A	212436531	212436531	0	8.6e-15	1.11368	0.138102
ENSG00000117691	NENF	chr1	212432888	212446379	rs17666456:212627628:C:T	212454286	212454286	1	3.1e-06	0.518803	0.109656
ENSG00000260805	RP11-61J19.5	chr1	212557834	212559731	rs112772142:212731917:T:TG	212558575	212558575	0	3.29e-05	0.154286	0.036734
ENSG00000162772	ATF3	chr1	212565335	212620777	rs138466093:212266917:G:A	212093575	212093575	0	2.96e-07	31.6166	6.06297
ENSG00000198468	FLVCR1-AS1	chr1	212852109	212858088	rs1874417:213036708:C:T	212863366	212863366	0	1.93e-96	1.12817	0.0402733
ENSG00000198468	FLVCR1-AS1	chr1	212852109	212858088	rs17757805:213888600:A:T	213715257	213715257	1	6.11e-06	0.348313	0.0759874
ENSG00000162769	FLVCR1	chr1	212858256	212899363	rs11120064:213079067:A:C	212905725	212905725	0	6.41e-28	0.87556	0.0739847
ENSG00000162769	FLVCR1	chr1	212858256	212899363	rs17677416:213061308:T:C	212887966	212887966	1	1.32e-05	-0.97107	0.220101
ENSG00000143494	VASH2	chr1	212950521	212992037	rs11409584:213150529:A:AG	212977187	212977187	0	1.66e-08	-0.18955	0.0328992
ENSG00000174606	ANGEL2	chr1	212992183	213015826	rs4951477:213232555:A:C	213059213	213059213	0	1.99e-26	-2.77714	0.242714
ENSG00000230461	PROX1-AS1	chr1	213817752	213988508	rs235924:214156860:T:C	213983517	213983517	0	1.3e-13	0.528574	0.0688957
ENSG00000230461	PROX1-AS1	chr1	213817752	213988508	rs74454622:214107008:C:T	213933665	213933665	1	3.31e-05	-0.626198	0.149135
ENSG00000274895	RP11-478J18.2	chr1	213983794	213986419	rs66760546:214161754:AG:A	213988411	213988412	0	2.64e-43	2.39236	0.153151
ENSG00000143499	SMYD2	chr1	214281103	214337131	rs17729519:214498421:T:C	214325078	214325078	0	3.08e-05	2.44712	0.580517
ENSG00000152104	PTPN14	chr1	214348697	214552449	rs2291831:214531239:C:T	214357896	214357896	0	1.8e-05	0.506184	0.11662
ENSG00000136636	KCTD3	chr1	215567393	215621807	rs2797393:215773825:G:A	215600483	215600483	0	5.26e-08	-3.04832	0.549466
ENSG00000196482	ESRRG	chr1	216503247	217137755	rs34000440:216903441:C:A	216730099	216730099	0	1.7e-05	-4.48161	1.02935
ENSG00000092978	GPATCH2	chr1	217426993	217631082	rs12139238:217821324:G:C	217647982	217647982	0	2.53e-06	-0.38172	0.0799561
ENSG00000092978	GPATCH2	chr1	217426993	217631082	rs2552082:217587072:T:C	217413730	217413730	1	4.33e-05	0.287343	0.0694977
ENSG00000067533	RRP15	chr1	218285288	218337983	rs199687119:218487314:TTTTTA:T	218313972	218313977	0	1.01e-17	0.60337	0.0671412
ENSG00000067533	RRP15	chr1	218285288	218337983	1:218176086:CAA:C	218002744	218002746	1	1.51e-05	-0.326601	0.0745612
ENSG00000196660	SLC30A10	chr1	219685428	219958647	rs150782431:220600019:A:G	220426677	220426677	0	6.94e-06	0.403472	0.0885622
ENSG00000136628	EPRS	chr1	219968602	220046658	rs2814495:220452157:C:G	220278815	220278815	0	1.01e-06	4.2569	0.857194
ENSG00000162813	BPNT1	chr1	220057483	220090462	rs10863537:220402403:T:C	220229061	220229061	0	3.34e-05	0.574924	0.136997
ENSG00000218283	MORF4L1P1	chr1	220253571	220254536	rs10863513:220075257:G:A	219901915	219901915	0	2.64e-05	-0.357492	0.0840849
ENSG00000116141	MARK1	chr1	220528184	220664461	rs11118563:220671050:C:T	220497708	220497708	0	6.64e-08	-1.93376	0.351336
ENSG00000162817	C1orf115	chr1	220689846	220699157	rs796486	220712270	220712270	0	3.24e-13	0.724208	0.0960908
ENSG00000162817	C1orf115	chr1	220689846	220699157	rs34101877:220616541:C:CA	220443199	220443199	1	4.95e-08	-0.646786	0.116343
ENSG00000162817	C1orf115	chr1	220689846	220699157	rs2808220:221151806:C:T	220978464	220978464	2	7.38e-06	-0.32886	0.0724032
ENSG00000117791	MTARC2	chr1	220748226	220784815	rs73092282:220621942:A:C	220448600	220448600	0	2.58e-07	0.822153	0.156847
ENSG00000186205	MTARC1	chr1	220786760	220819657	rs59234976:220966290:T:C	220792948	220792948	0	3.38e-06	1.15866	0.245862
ENSG00000143507	DUSP10	chr1	221701425	221742176	rs10863652	221749700	221749700	0	2.41e-05	-1.31731	0.308278
ENSG00000143498	TAF1A	chr1	222557903	222589933	rs35185483:222772660:CTG:C	222599318	222599320	0	8.35e-13	0.448248	0.0606179
ENSG00000225265	TAF1A-AS1	chr1	222589826	222593032	rs17011636:222725850:T:C	222552508	222552508	0	5.35e-24	-0.428391	0.0397069
ENSG00000272750	RP11-378J18.8	chr1	222658868	222661512	rs4575092:222834503:A:T	222661161	222661161	0	3.94e-23	-0.275194	0.0260829
ENSG00000186063	AIDA	chr1	222668014	222713210	rs2291834:222832295:T:C	222658953	222658953	0	5.35e-08	1.49037	0.268794
ENSG00000162819	BROX	chr1	222712554	222735196	rs73126825:222934113:G:C	222760771	222760771	0	1.14e-17	5.59039	0.623192
ENSG00000228106	RP11-452F19.3	chr1	222815023	222837384	rs17476063:223016406:T:A	222843064	222843064	0	5.9e-10	0.285669	0.0449988
ENSG00000154309	DISP1	chr1	222872272	223005995	1:223110341:T:G	222936999	222936999	0	3.47e-06	0.687209	0.146007
ENSG00000187554	TLR5	chr1	223109407	223143282	rs72743840:223321534:C:T	223148192	223148192	0	5.76e-06	0.560168	0.121859
ENSG00000143502	SUSD4	chr1	223220820	223364202	rs1856933:223481532:G:A	223308190	223308190	0	1.96e-08	1.05079	0.183333
ENSG00000162909	CAPN2	chr1	223701594	223776018	rs1222154:223953405:T:C	223765703	223765703	0	6.04e-09	-0.401094	0.0674753
ENSG00000162909	CAPN2	chr1	223701594	223776018	rs28370130:223949827:G:A	223762125	223762125	1	4.78e-07	-0.696395	0.136042
ENSG00000162909	CAPN2	chr1	223701594	223776018	rs11810318:223974310:A:G	223786608	223786608	2	7.71e-06	-0.326949	0.0721364
ENSG00000227621	PHBP11	chr1	223856580	223857387	rs199866404:224203829:CGAATGGAATG:C	224016127	224016137	0	5.72e-05	0.165418	0.0406676
ENSG00000188460	ACTBP11	chr1	223863727	223864851	rs10915946:224074598:T:C	223886896	223886896	0	1.91e-07	-0.350978	0.0662111
ENSG00000185495	RP11-504P24.3	chr1	223992744	224010612	rs113692271:224142393:T:C	223954691	223954691	0	3.79e-39	5.47455	0.374173
ENSG00000278467	RP11-504P24.9	chr1	223994263	223995196	rs368479224:224132776:CTT:C	223945074	223945076	0	1.06e-06	0.15619	0.031516
ENSG00000143756	FBXO28	chr1	224114088	224162047	rs56252709:224359586:GT:G	224171884	224171885	0	5.32e-06	1.15122	0.249494
ENSG00000143753	DEGS1	chr1	224175757	224193441	rs111611390:224374270:C:T	224186568	224186568	0	5e-08	1.88121	0.338509
ENSG00000143771	CNIH4	chr1	224356851	224379459	rs10916606:224570425:C:T	224382723	224382723	0	1.01e-18	0.737419	0.0793958
ENSG00000143771	CNIH4	chr1	224356851	224379459	rs28395431:223823593:T:A	223635891	223635891	1	6.04e-05	-0.480571	0.118528
ENSG00000143786	CNIH3	chr1	224434661	224740549	rs4654037:224567004:G:A	224379302	224379302	0	2.15e-10	0.415811	0.0637971
ENSG00000143815	LBR	chr1	225401503	225428925	rs4653636:225615566:G:C	225427864	225427864	0	2.25e-05	-0.852055	0.198642
ENSG00000143742	SRP9	chr1	225777814	225790466	rs6677132	225779895	225779895	0	1.22e-05	-3.96022	0.894147
ENSG00000143819	EPHX1	chr1	225810093	225845563	rs41266229:226016381:G:A	225828680	225828680	0	3.2e-08	2.56376	0.454518
ENSG00000196187	TMEM63A	chr1	225845537	225882369	rs360078:226083977:G:A	225896277	225896277	0	1.6e-07	-0.927792	0.1739
ENSG00000243709	LEFTY1	chr1	225886283	225911382	rs73131849:226108200:C:T	225920500	225920500	0	6.07e-14	-0.782613	0.100551
ENSG00000243709	LEFTY1	chr1	225886283	225911382	rs76889922:226104283:C:T	225916583	225916583	1	3.31e-12	-0.749244	0.104287
ENSG00000143811	PYCR2	chr1	225919878	225924340	rs77157663:226111945:T:C	225924245	225924245	0	1.72e-09	-4.83251	0.78383
ENSG00000143751	SDE2	chr1	225982703	225999331	rs762645:227107912:C:T	226920211	226920211	0	5.21e-05	-0.872072	0.213204
ENSG00000182827	ACBD3	chr1	226144680	226186730	rs3008193:226386426:C:T	226198725	226198725	0	1.33e-06	1.40116	0.285399
ENSG00000203685	STUM	chr1	226548801	226609214	rs837748:226737845:A:G	226550144	226550144	0	5.68e-08	-0.691769	0.125013
ENSG00000203685	STUM	chr1	226548801	226609214	rs4653751:226741284:A:T	226553583	226553583	1	2.01e-06	0.454705	0.0942794
ENSG00000143772	ITPKB	chr1	226631691	226739323	rs1071530:226882457:A:C	226694756	226694756	0	5.24e-10	0.551524	0.0866036
ENSG00000163050	ADCK3	chr1	226897537	226987545	rs1800674:227085824:A:G	226898123	226898123	0	9.92e-14	-0.508981	0.0660027
ENSG00000163050	ADCK3	chr1	226897537	226987545	rs67178833:227003748:TA:T	226816047	226816048	1	3.13e-06	0.348746	0.0737481
ENSG00000143776	CDC42BPA	chr1	226989866	227318474	rs190404486:227321013:G:A	227133312	227133312	0	1.6e-26	1.66478	0.145178
ENSG00000143776	CDC42BPA	chr1	226989866	227318474	rs113976760:227352252:A:AGCTACTCAGGAG	227164551	227164551	1	7.15e-09	-0.748506	0.126564
ENSG00000143776	CDC42BPA	chr1	226989866	227318474	rs374410485:227225856:T:A	227038155	227038155	2	1.71e-08	-0.868247	0.150844
ENSG00000181450	ZNF678	chr1	227563544	227677443	1:227727491:CA:C	227539790	227539791	0	3.02e-05	-0.787356	0.186552
ENSG00000143740	SNAP47	chr1	227728540	227781231	exm154594	227747743	227747743	0	3.94e-17	-0.978861	0.111158
ENSG00000162910	MRPL55	chr1	228106680	228109312	rs849749	228109044	228109044	0	7.64e-09	0.542477	0.0919106
ENSG00000181873	IBA57	chr1	228165816	228182257	rs10753445:228378572:G:C	228190871	228190871	0	1.03e-13	0.805613	0.104549
ENSG00000162913	C1orf145	chr1	228203507	228213664	rs1832734:228253830:G:C	228066129	228066129	0	2.73e-13	0.418368	0.0553251
ENSG00000154358	OBSCN	chr1	228208131	228378874	rs10565504:228366286:CAAA:C	228178585	228178588	0	1.13e-19	0.617578	0.0645382
ENSG00000154358	OBSCN	chr1	228208131	228378874	rs910494:228933937:T:C	228798190	228798190	1	1.17e-05	-0.335998	0.0757028
ENSG00000181218	HIST3H2A	chr1	228456980	228457873	rs74375332:228669322:CA:C	228481621	228481622	0	2.76e-06	0.505289	0.10624
ENSG00000168159	RNF187	chr1	228487062	228495766	rs3839025:228681913:CT:C	228494212	228494213	0	4.43e-14	-5.2725	0.673462
ENSG00000116574	RHOU	chr1	228735078	228746669	rs4653914:228364558:A:T	228176857	228176857	1	8.81e-06	-0.775321	0.172194
ENSG00000168118	RAB4A	chr1	229271063	229305894	rs71864455:229430725:C:CT	229294978	229294978	0	6.26e-06	-1.33214	0.29097
ENSG00000135775	COG2	chr1	230642490	230693982	rs4847000	230645995	230645995	0	2.2e-06	-0.397351	0.0827182
ENSG00000135775	COG2	chr1	230642490	230693982	rs11348455:231203293:AT:A	231067547	231067548	1	3.42e-05	-0.326292	0.0778617
ENSG00000135744	AGT	chr1	230702524	230714297	rs1977414:230852551:C:T	230716805	230716805	0	5.63e-08	3.28698	0.593834
ENSG00000119280	C1orf198	chr1	230837120	230869589	rs4370756:231264548:T:C	231128802	231128802	0	7.02e-13	-0.490633	0.0661153
ENSG00000119280	C1orf198	chr1	230837120	230869589	rs61142086:231249078:G:C	231113332	231113332	1	2e-11	-0.873064	0.126469
ENSG00000119280	C1orf198	chr1	230837120	230869589	rs11355270:230980962:TA:T	230845216	230845217	2	1.23e-05	-0.320007	0.0722877
ENSG00000173409	ARV1	chr1	230978982	231000595	rs71864377:231110957:G:GA	230975211	230975211	0	4.1e-06	-1.21457	0.260019
ENSG00000182118	FAM89A	chr1	231018959	231040246	rs12750965:231085611:A:G	230949865	230949865	0	1.77e-07	1.05129	0.197761
ENSG00000119283	TRIM67	chr1	231162113	231221556	rs6659596:231297752:T:A	231162006	231162006	0	1e-06	-1.6904	0.340255
ENSG00000143633	C1orf131	chr1	231223764	231241187	rs566796:231361505:G:T	231225759	231225759	0	1.75e-05	0.311172	0.0715809
ENSG00000116906	GNPAT	chr1	231241208	231277973	rs532163:231416401:A:G	231280655	231280655	0	2.55e-19	1.52242	0.16085
ENSG00000010072	SPRTN	chr1	231337105	231355023	rs34584064:231509427:T:C	231373681	231373681	0	8.47e-07	-0.572578	0.114453
ENSG00000135766	EGLN1	chr1	231363752	231425044	1:231558054:G:C	231422308	231422308	0	4.08e-07	-18.574	3.60621
ENSG00000116918	TSNAX	chr1	231528654	231566524	rs72764542:231109400:A:C	230973654	230973654	0	1.8e-05	-2.59352	0.59743
ENSG00000116991	SIPA1L2	chr1	232397966	232561558	rs9725606:232230516:C:G	232094770	232094770	0	8.62e-06	0.428556	0.0950782
ENSG00000116991	SIPA1L2	chr1	232397966	232561558	rs4649387:232715788:A:G	232580042	232580042	1	2.29e-05	0.386243	0.0901391
ENSG00000212916	MAP10	chr1	232804893	232808407	rs1495986	232801993	232801993	0	1.7e-07	0.611967	0.114965
ENSG00000135778	NTPCR	chr1	232950606	232983882	rs3820124	232948998	232948998	0	1.85e-22	0.76205	0.0735257
ENSG00000135778	NTPCR	chr1	232950606	232983882	rs2795456:232957202:C:T	232821456	232821456	1	3.71e-08	0.63993	0.114005
ENSG00000135749	PCNX2	chr1	232983436	233295713	rs12085776:233204882:G:A	233069136	233069136	0	2.72e-06	2.31267	0.485928
ENSG00000135750	KCNK1	chr1	233614005	233672512	rs61824321:233797733:C:T	233661987	233661987	0	1.52e-14	-0.599964	0.0751535
ENSG00000135750	KCNK1	chr1	233614005	233672512	rs4333882	234217153	234217153	1	1.71e-05	-0.3595	0.0825927
ENSG00000231663	RP5-827C21.4	chr1	234372808	234373593	rs115432468:234530971:C:T	234395225	234395225	0	7.35e-35	1.28649	0.0946724
ENSG00000231663	RP5-827C21.4	chr1	234372808	234373593	rs140254947:234502533:C:A	234366787	234366787	1	8.52e-06	0.847258	0.187855
ENSG00000168275	COA6	chr1	234373457	234384049	rs113520246:234501722:G:GTGTC	234365976	234365976	0	1.85e-08	0.388999	0.0677444
ENSG00000059588	TARBP1	chr1	234391314	234479103	rs61077059:234509858:GT:G	234374112	234374113	0	2.24e-05	-0.33684	0.0785056
ENSG00000059588	TARBP1	chr1	234391314	234479103	rs941965:234614698:C:T	234478952	234478952	1	2.21e-05	-0.774182	0.180316
ENSG00000231768	LINC01354	chr1	234527892	234531779	rs271738:234662890:G:A	234527144	234527144	0	7e-17	-0.500283	0.0573131
ENSG00000228044	RP4-781K5.4	chr1	234646290	234683176	rs485615:234819747:C:T	234684001	234684001	0	7.93e-10	0.287145	0.0455932
ENSG00000188739	RBM34	chr1	235131184	235161457	rs4567344:235270774:C:T	235107459	235107459	0	2.41e-05	0.686887	0.160752
ENSG00000116957	TBCE	chr1	235367361	235448968	rs6691760:235648441:T:C	235485125	235485125	0	1.22e-14	2.0725	0.258589
ENSG00000168243	GNG4	chr1	235547688	235650754	rs114334552:235777909:C:T	235614609	235614609	0	1.11e-05	3.09708	0.695711
ENSG00000077585	GPR137B	chr1	236142506	236221865	rs147679159:236370312:C:CT	236207012	236207012	0	1.63e-10	0.680613	0.103696
ENSG00000077585	GPR137B	chr1	236142506	236221865	rs78098005:236352501:C:A	236189201	236189201	1	4.17e-05	-0.326487	0.0787905
ENSG00000086619	ERO1B	chr1	236215556	236281985	exm161663	236249930	236249930	0	6.3e-11	-2.19228	0.326293
ENSG00000116977	LGALS8	chr1	236518001	236552981	rs1891240:236694594:A:G	236531294	236531294	0	4.15e-18	-5.07927	0.557921
ENSG00000119285	HEATR1	chr1	236549006	236604504	exm162065	236586349	236586349	0	7.6e-14	1.57321	0.202983
ENSG00000077522	ACTN2	chr1	236686455	236764631	rs11804680:236795734:C:G	236632434	236632434	0	2.83e-13	1.16587	0.154276
ENSG00000116984	MTR	chr1	236795282	236903981	rs12089156:236982631:T:A	236819331	236819331	0	2.38e-07	-2.28185	0.434013
ENSG00000133019	CHRM3	chr1	239386566	239915452	rs2095897:240832237:G:A	240668937	240668937	0	1.01e-05	-0.422774	0.0945548
ENSG00000180875	GREM2	chr1	240489574	240612149	rs1343915:240776886:A:T	240613586	240613586	0	3.4e-07	1.52078	0.293189
ENSG00000182901	RGS7	chr1	240775516	241357230	rs35910815:242406713:T:C	242243411	242243411	0	1.69e-05	0.916578	0.210476
ENSG00000203668	CHML	chr1	241628854	241640254	rs2342689:241810798:G:A	241647496	241647496	0	7.75e-09	-1.21516	0.205971
ENSG00000214837	LINC01347	chr1	243056308	243101744	rs71176753:242528276:GAA:G	242364974	242364976	0	5.55e-07	-0.937444	0.184224
ENSG00000143702	CEP170	chr1	243124429	243255348	rs10926961:243355204:G:A	243191902	243191902	0	1.55e-11	2.70455	0.389483
ENSG00000054282	SDCCAG8	chr1	243256035	243500092	rs10926961:243355204:G:A	243191902	243191902	0	3.06e-11	1.02855	0.150476
ENSG00000203667	COX20	chr1	244835323	244845057	rs10927331:244999396:G:A	244836094	244836094	0	5.26e-14	-7.04179	0.902306
ENSG00000272195	RP11-156E8.1	chr1	244969351	244971088	rs10623979:245148152:C:CAA	244984850	244984850	0	7.23e-33	0.528293	0.040343
ENSG00000203666	EFCAB2	chr1	244969706	245127164	rs140218267:245129294:CA:C	244965992	244965993	0	1.26e-111	-9.84865	0.309842
ENSG00000185420	SMYD3	chr1	245749343	246507312	rs12742618:246716393:G:A	246553091	246553091	0	4.19e-07	0.555022	0.107873
ENSG00000162851	TFB2M	chr1	246540561	246566324	rs3124121:246709388:A:G	246546086	246546086	0	1.28e-09	-0.442321	0.0711644
ENSG00000162852	CNST	chr1	246566445	246668584	rs12750641:246722913:A:C	246559611	246559611	0	1.88e-20	3.36439	0.343478
ENSG00000260698	RP11-439E19.9	chr1	246682109	246685075	rs139390343:246839683:G:GT	246676381	246676381	0	9.08e-12	-0.144576	0.0205726
ENSG00000143653	SCCPDH	chr1	246724048	246768137	rs79209897:247899026:T:G	247735724	247735724	0	3.71e-05	-2.37899	0.57025
ENSG00000260855	RP11-439E19.10	chr1	246772302	246775772	rs6682907:246952424:C:A	246789122	246789122	0	1.57e-11	0.543705	0.0783305
ENSG00000260855	RP11-439E19.10	chr1	246772302	246775772	exm165568	246767262	246767262	1	2.47e-15	-1.07043	0.129909
ENSG00000260855	RP11-439E19.10	chr1	246772302	246775772	rs9426215:246878352:C:T	246715050	246715050	2	8.33e-10	-0.672255	0.106884
ENSG00000227953	LINC01341	chr1	246776014	246792385	rs6693529:246958061:G:T	246794759	246794759	0	1.24e-13	0.619959	0.0807413
ENSG00000227953	LINC01341	chr1	246776014	246792385	exm165568	246767262	246767262	1	6.95e-24	-1.33129	0.12375
ENSG00000227953	LINC01341	chr1	246776014	246792385	rs113413115:246983170:G:T	246819868	246819868	2	3.14e-06	-0.597059	0.126271
ENSG00000227953	LINC01341	chr1	246776014	246792385	rs4130316:246919422:C:T	246756120	246756120	3	8.07e-06	-0.318492	0.0704293
ENSG00000277462	ZNF670	chr1	247036785	247078755	rs59525684:247238815:T:C	247075513	247075513	0	2.61e-21	-0.666106	0.0663429
ENSG00000277462	ZNF670	chr1	247036785	247078755	rs4925692:247267274:C:A	247103972	247103972	1	8.38e-07	0.368473	0.0736211
ENSG00000188295	ZNF669	chr1	247099963	247104372	rs2270616:247267668:G:T	247104366	247104366	0	7e-25	0.851499	0.0772075
ENSG00000196418	ZNF124	chr1	247121976	247172016	rs10158232:247289429:A:T	247126127	247126127	0	3.61e-35	-0.693653	0.0507622
ENSG00000259865	RP11-488L18.10	chr1	247187282	247188526	rs56065612:247358114:A:G	247194812	247194812	0	3.11e-11	0.402614	0.0589251
ENSG00000162714	ZNF496	chr1	247297413	247331846	rs12030577:247474712:A:C	247311410	247311410	0	7.9e-28	-1.9391	0.164184
ENSG00000169224	GCSAML	chr1	247507059	247577690	rs67270810:247657703:AC:A	247494401	247494402	0	1.47e-22	0.873742	0.0840775
ENSG00000169224	GCSAML	chr1	247507059	247577690	rs71533502:247685583:T:C	247522281	247522281	1	1.77e-07	0.551461	0.103742
ENSG00000203663	OR2L2	chr1	248038269	248039206	rs7368310:248120187:T:G	247956885	247956885	0	2.76e-13	-0.534206	0.0706577
ENSG00000203663	OR2L2	chr1	248038269	248039206	rs114912909:247843730:T:C	247680428	247680428	1	1.38e-05	1.22291	0.277788
ENSG00000196071	OR2L13	chr1	248098650	248100922	exm167241	247965627	247965627	0	1.47e-34	0.843679	0.0624272
ENSG00000196071	OR2L13	chr1	248098650	248100922	rs370985798:248122918:A:G	247959616	247959616	1	5.05e-06	0.851384	0.184065
ENSG00000196071	OR2L13	chr1	248098650	248100922	rs114624320:248029655:T:G	247866353	247866353	2	3.78e-05	-0.693864	0.166509
ENSG00000175137	SH3BP5L	chr1	248810447	248826633	rs5024943:249077287:T:G	248783088	248783088	0	2.82e-06	-0.863967	0.181829
ENSG00000035115	SH3YL1	chr2	217731	266398	rs62114506:242793:G:C	242793	242793	0	8.74e-11	1.55159	0.232773
ENSG00000151353	TMEM18	chr2	667336	677439	rs3749138:677213:G:A	677213	677213	0	1.23e-14	1.9528	0.243695
ENSG00000235688	AC116614.1	chr2	949628	950274	rs75370175:1027896:C:T	1032210	1032210	0	3.43e-05	-0.187515	0.0447502
ENSG00000172554	SNTG2	chr2	950869	1367613	rs61503767:1044521:T:C	1048835	1048835	0	1.11e-15	1.09652	0.131293
ENSG00000172554	SNTG2	chr2	950869	1367613	rs7580461:932923:C:T	937237	937237	1	2.41e-05	-0.305728	0.071547
ENSG00000130508	PXDN	chr2	1631888	1744852	rs6757166:1821294:A:G	1817522	1817522	0	4.57e-07	-3.09744	0.604039
ENSG00000032389	TSSC1	chr2	3188926	3377882	rs149977195:2309750:G:A	2305978	2305978	0	2.8e-07	1.44775	0.277062
ENSG00000032389	TSSC1	chr2	3188926	3377882	rs17682	3189269	3189269	1	4.56e-06	0.34685	0.0746299
ENSG00000171853	TRAPPC12	chr2	3379676	3485094	rs10188449	3476595	3476595	0	1.91e-10	0.464877	0.0711094
ENSG00000171853	TRAPPC12	chr2	3379676	3485094	rs7601188	3378669	3378669	1	1.06e-08	-0.38939	0.0666345
ENSG00000182551	ADI1	chr2	3497362	3519736	rs6751350:3523444:C:A	3519673	3519673	0	6.01e-16	0.710079	0.0841711
ENSG00000182551	ADI1	chr2	3497362	3519736	rs77685453:3509503:C:G	3505732	3505732	1	4.09e-08	-0.88501	0.158176
ENSG00000234171	RNASEH1-AS1	chr2	3558493	3561745	rs4583476	3561166	3561166	0	1.6e-62	-0.920728	0.0458803
ENSG00000171863	RPS7	chr2	3575206	3580919	rs62106040:3627302:A:T	3579712	3579712	0	1.45e-14	-1.29866	0.162549
ENSG00000171863	RPS7	chr2	3575206	3580919	rs62107195:3652864:C:T	3605274	3605274	1	4.26e-06	-0.360189	0.0772499
ENSG00000171863	RPS7	chr2	3575206	3580919	rs6726886:4406088:G:A	4358498	4358498	2	2.4e-05	-0.349608	0.0817922
ENSG00000232044	LINC01105	chr2	5932688	6001275	rs4669966	5935550	5935550	0	7.05e-53	-0.913991	0.0511984
ENSG00000232044	LINC01105	chr2	5932688	6001275	rs10192916:6077834:T:A	5937702	5937702	1	1.79e-17	-1.12381	0.12611
ENSG00000235092	ID2-AS1	chr2	8666637	8681863	rs79993884:9721339:G:C	9581210	9581210	0	4.47e-05	0.31789	0.0770204
ENSG00000151693	ASAP2	chr2	9206766	9405683	rs12994128:9336277:G:T	9196148	9196148	0	5.71e-26	0.764486	0.0675303
ENSG00000151693	ASAP2	chr2	9206766	9405683	rs10210194:9542215:C:T	9402086	9402086	1	3.35e-09	0.617102	0.102026
ENSG00000134330	IAH1	chr2	9473659	9496543	rs138079650:9606389:ACACAAAGACGCACG:A	9466260	9466274	0	3.29e-11	-0.940969	0.137897
ENSG00000151694	ADAM17	chr2	9488487	9555792	rs12692386:9695906:A:G	9555777	9555777	0	1.36e-95	7.49829	0.26965
ENSG00000115750	TAF1B	chr2	9843355	9934416	rs34015322:9967620:T:TA	9827491	9827491	0	7.96e-19	1.05324	0.113024
ENSG00000269973	RP11-95D17.1	chr2	9936361	9939590	rs287977:9970018:T:C	9829889	9829889	0	8.83e-16	0.699002	0.0833826
ENSG00000269973	RP11-95D17.1	chr2	9936361	9939590	rs12991461:10069244:A:G	9929115	9929115	1	9.94e-07	0.420649	0.0846376
ENSG00000260077	RP11-254F7.2	chr2	10039093	10040663	rs113710918:10191820:A:G	10051693	10051693	0	1.42e-13	0.616436	0.0804858
ENSG00000172059	KLF11	chr2	10042850	10054836	rs146577191:10750849:G:A	10610723	10610723	0	1.64e-05	1.03888	0.238188
ENSG00000172059	KLF11	chr2	10042850	10054836	rs372827624:10183748:TGCC:T	10043621	10043624	1	6.69e-07	0.387305	0.0766811
ENSG00000115761	NOL10	chr2	10570767	10689987	rs71392244:10747298:A:AT	10607172	10607172	0	3.01e-07	0.93669	0.179752
ENSG00000243819	RN7SL832P	chr2	10690345	10692099	rs200196813:10727182:CAT:C	10587056	10587058	0	2.37e-14	-0.168233	0.0212427
ENSG00000150873	C2orf50	chr2	11133054	11146790	rs12617097:11277441:A:G	11137315	11137315	0	3.13e-09	0.486591	0.0802865
ENSG00000150873	C2orf50	chr2	11133054	11146790	rs11452887:11288244:A:AT	11148118	11148118	1	2.94e-07	-0.815183	0.156295
ENSG00000134324	LPIN1	chr2	11677596	11827409	rs3795974	11784824	11784824	0	3.89e-85	1.11536	0.0440693
ENSG00000134324	LPIN1	chr2	11677596	11827409	HUNT_MISSENSE_2copiesormore_chr2_11853913	11713787	11713787	1	6.52e-36	0.935358	0.0675497
ENSG00000071575	TRIB2	chr2	12716890	12742734	rs77773048:12858078:G:A	12717952	12717952	0	2.68e-10	17.3276	2.67358
ENSG00000225649	AC064875.2	chr2	12966785	13007013	rs13427697:13147154:T:C	13007029	13007029	0	3.32e-10	-0.498256	0.0773058
ENSG00000079785	DDX1	chr2	15591179	15631111	rs73915402:15732238:G:C	15592114	15592114	0	1.15e-22	0.937881	0.0899961
ENSG00000079785	DDX1	chr2	15591179	15631111	rs146717238:15734199:C:CA	15594075	15594075	1	2.63e-08	0.442711	0.0779839
ENSG00000197872	FAM49A	chr2	16549460	16666331	rs1722418	16639037	16639037	0	1.85e-08	0.382059	0.0665403
ENSG00000197872	FAM49A	chr2	16549460	16666331	rs62114520:16460070:G:T	16278802	16278802	1	1.94e-05	0.991835	0.229433
ENSG00000163029	SMC6	chr2	17663813	17800242	2:17959590:C:T	17778323	17778323	0	2.31e-15	1.55123	0.188039
ENSG00000178295	GEN1	chr2	17753859	17788941	rs16983255:17340979:C:A	17159712	17159712	0	8.23e-13	6.24763	0.844637
ENSG00000240857	RDH14	chr2	18554724	18560680	rs2130309:18612821:G:A	18431555	18431555	0	5.29e-05	1.1021	0.269685
ENSG00000228784	LINC00954	chr2	19868861	19885047	rs34354920:20078608:C:T	19878847	19878847	0	9.43e-30	-1.13895	0.0925401
ENSG00000183891	TTC32	chr2	19896644	19901986	rs7595902:20074271:G:A	19874510	19874510	0	2.63e-11	-1.52046	0.22166
ENSG00000118965	WDR35	chr2	19910261	19990131	rs1017446:20089224:T:C	19889463	19889463	0	8.59e-16	-3.25207	0.387755
ENSG00000143878	RHOB	chr2	20447075	20449445	rs11096680:20812231:T:A	20612471	20612471	0	4.35e-09	0.441897	0.0736167
ENSG00000143878	RHOB	chr2	20447075	20449445	rs12614172:20711512:G:T	20511752	20511752	1	3.01e-08	0.534377	0.0945404
ENSG00000118960	HS1BP3	chr2	20560449	20651089	rs4666317:20815185:C:T	20615425	20615425	0	7.76e-09	0.409238	0.069368
ENSG00000118961	LDAH	chr2	20684015	20823130	rs59271655:20884135:TTTAATC:T	20684375	20684381	0	1.69e-54	-2.34796	0.128828
ENSG00000119778	ATAD2B	chr2	23748665	23927114	rs4665244:24102691:A:G	23879821	23879821	0	1.48e-10	-1.9025	0.289147
ENSG00000173960	UBXN2A	chr2	23927286	24004909	rs10666550:24227107:C:CTG	24004237	24004237	0	1.03e-12	-1.00568	0.13659
ENSG00000163026	WDCP	chr2	24029341	24049575	rs76734867:24634968:T:A	24412099	24412099	0	3.79e-08	-1.08899	0.19413
ENSG00000163026	WDCP	chr2	24029341	24049575	rs34420034:24351791:AT:A	24128921	24128922	1	3.74e-06	0.437636	0.0933003
ENSG00000219626	FAM228B	chr2	24076527	24169640	rs35256197:24295030:A:AT	24072160	24072160	0	2.01e-53	-1.34622	0.0748837
ENSG00000219626	FAM228B	chr2	24076527	24169640	rs57641483:24352176:CT:C	24129306	24129307	1	1.52e-08	-0.540044	0.0934639
ENSG00000115129	TP53I3	chr2	24077434	24085861	2:24504521:C:CA	24281652	24281652	0	2.6e-05	-0.407639	0.0957933
ENSG00000198399	ITSN2	chr2	24202865	24360714	rs10196274:24597639:T:C	24374770	24374770	0	1.11e-08	-1.19989	0.205612
ENSG00000198399	ITSN2	chr2	24202865	24360714	rs116539952:24401133:G:A	24178264	24178264	1	1.21e-07	-1.27297	0.236188
ENSG00000084676	NCOA1	chr2	24491915	24770702	rs1135342:24714831:G:T	24491962	24491962	0	1.33e-08	-5.61579	0.967872
ENSG00000115137	DNAJC27	chr2	24943637	24972094	2:25269375:CT:C	25046506	25046507	0	1.41e-06	-0.576315	0.117681
ENSG00000115137	DNAJC27	chr2	24943637	24972094	rs13007284:25345685:C:A	25122816	25122816	1	1.56e-05	-0.407914	0.0932555
ENSG00000224165	DNAJC27-AS1	chr2	24971391	25039694	rs2002947:25290295:G:T	25067426	25067426	0	6.17e-18	-0.701949	0.0775468
ENSG00000224165	DNAJC27-AS1	chr2	24971391	25039694	rs10598706:25196330:TTTTTTG:T	24973461	24973467	1	3.18e-06	-0.354649	0.0750493
ENSG00000084710	EFR3B	chr2	25042131	25159137	rs55748729:25249075:G:A	25026206	25026206	0	1.79e-05	4.16968	0.960231
ENSG00000235072	AC012074.2	chr2	25369137	25375845	rs12615633:25894250:C:T	25671381	25671381	0	2.24e-07	-0.177905	0.0337642
ENSG00000138101	DTNB	chr2	25377199	25673647	rs71439186:25857948:G:T	25635079	25635079	0	1.26e-07	-0.617009	0.114661
ENSG00000143970	ASXL2	chr2	25733754	25878516	rs56694749:25971372:TA:T	25748503	25748504	0	1.09e-13	3.08898	0.40129
ENSG00000138029	HADHB	chr2	26243171	26290468	rs6761770:26462937:C:G	26240069	26240069	0	6.29e-31	-13.8429	1.09802
ENSG00000138018	EPT1	chr2	26308548	26395891	2:26416162:C:CTT	26193293	26193293	0	5.08e-05	1.43581	0.350492
ENSG00000171303	KCNK3	chr2	26692691	26733420	rs67888806:26852805:A:C	26629937	26629937	0	3.35e-18	-2.5698	0.281408
ENSG00000157851	DPYSL5	chr2	26847748	26950351	rs10865438:26948154:C:T	26725286	26725286	0	1.28e-05	6.67341	1.51026
ENSG00000084693	AGBL5	chr2	27042365	27070622	2:27923018:A:AAAT	27700151	27700151	0	5.82e-05	0.866675	0.213291
ENSG00000138030	KHK	chr2	27086748	27100772	rs11126836	27050260	27050260	0	4.24e-20	-0.47579	0.0490878
ENSG00000143994	ABHD1	chr2	27123790	27130812	rs113053199:27374263:C:T	27151395	27151395	0	3.22e-06	0.192382	0.0407307
ENSG00000138073	PREB	chr2	27130757	27134675	rs71401560:27353979:T:TA	27131111	27131111	0	2.09e-09	-1.41314	0.230498
ENSG00000138074	SLC5A6	chr2	27199588	27212958	rs62130680:27458790:T:C	27235922	27235922	0	1.15e-22	-2.20395	0.211476
ENSG00000138085	ATRAID	chr2	27212028	27217178	rs2384575:27387429:T:C	27164561	27164561	0	1.7e-13	2.03072	0.266068
ENSG00000084774	CAD	chr2	27217391	27243943	rs1439767:27389634:A:G	27166766	27166766	0	1.73e-13	-1.53801	0.20157
ENSG00000234072	AC074117.10	chr2	27356247	27367622	rs1104:27599875:T:G	27377008	27377008	0	1.15e-32	2.81528	0.215812
ENSG00000163795	ZNF513	chr2	27377232	27380790	2:27354254:G:A	27131386	27131386	0	4.1e-05	1.52408	0.367451
ENSG00000115241	PPM1G	chr2	27381195	27409687	rs59639860:27588961:CTG:C	27366094	27366096	0	3.28e-22	-1.82936	0.1777
ENSG00000138002	IFT172	chr2	27444372	27489789	exm2265307	27489026	27489026	0	4.09e-10	-3.94352	0.615197
ENSG00000163798	SLC4A1AP	chr2	27663472	27694976	rs61185615:27769212:T:C	27546345	27546345	0	2.41e-05	1.18225	0.27664
ENSG00000171174	RBKS	chr2	27781365	27891098	rs142615064:28386145:C:T	28163278	28163278	0	3.25e-12	6.71963	0.934912
ENSG00000213639	PPP1CB	chr2	28751641	28802940	rs12714243:28992293:G:A	28769427	28769427	0	3.51e-13	8.03626	1.06798
ENSG00000171103	TRMT61B	chr2	28849822	28870301	rs61226201:29060630:T:A	28837764	28837764	0	6.46e-31	1.28299	0.10179
ENSG00000163811	WDR43	chr2	28894644	28948222	rs12472404:29179452:G:C	28956586	28956586	0	1.07e-15	2.1149	0.253068
ENSG00000189350	FAM179A	chr2	28956612	29061373	rs35065755:29179936:C:CT	28957070	28957070	0	1.38e-24	0.813289	0.0742788
ENSG00000189350	FAM179A	chr2	28956612	29061373	rs11896479:29250075:C:T	29027209	29027209	1	1.2e-07	0.416205	0.0772052
ENSG00000179270	C2orf71	chr2	29060977	29074261	rs7585244:29283509:C:T	29060643	29060643	0	1.2e-06	19.2156	3.89728
ENSG00000233862	AC016907.3	chr2	30051067	30143804	rs113446570:31174593:G:A	30951727	30951727	0	5.33e-06	-0.160622	0.0348147
ENSG00000119801	YPEL5	chr2	30146942	30160533	rs78589710:30389542:G:A	30166676	30166676	0	7.72e-06	14.1525	3.12272
ENSG00000213626	LBH	chr2	30231532	30323730	rs906866:30478185:T:C	30255319	30255319	0	4.04e-34	-25.4992	1.90206
ENSG00000172954	LCLAT1	chr2	30447227	30644225	rs59076230:30873169:G:A	30650303	30650303	0	3.26e-11	-0.93458	0.136936
ENSG00000158089	GALNT14	chr2	30910468	31155202	rs78070886:31518191:A:G	31295325	31295325	0	4.41e-05	0.422127	0.102197
ENSG00000158125	XDH	chr2	31334322	31414715	rs72790679:31654155:G:A	31431289	31431289	0	3.55e-10	1.6206	0.251879
ENSG00000158125	XDH	chr2	31334322	31414715	rs206834	31486551	31486551	1	1.32e-05	-0.378059	0.0856846
ENSG00000162961	DPY30	chr2	31867810	32039812	rs150656:33179432:T:C	32954365	32954365	0	4.14e-05	0.438982	0.105892
ENSG00000021574	SPAST	chr2	32063612	32157637	rs62142080:32182528:T:C	31957459	31957459	0	2.08e-05	-0.63259	0.146876
ENSG00000276334	AL133243.1	chr2	32521928	32523547	rs2568464:32848658:T:C	32623591	32623591	0	2.43e-10	0.35303	0.0543354
ENSG00000018699	TTC27	chr2	32628033	32821051	rs41410549:32894470:G:C	32669403	32669403	0	4.55e-17	-0.872504	0.099299
ENSG00000018699	TTC27	chr2	32628033	32821051	rs111300133:32939782:G:A	32714715	32714715	1	1.21e-05	0.732264	0.165263
ENSG00000049323	LTBP1	chr2	32946973	33399509	rs10202440	32874313	32874313	0	6.35e-10	0.443133	0.0699409
ENSG00000152689	RASGRP3	chr2	33436325	33564750	rs13406027:33781995:C:T	33556928	33556928	0	2.96e-08	0.680203	0.120272
ENSG00000119812	FAM98A	chr2	33583659	33599382	rs6740336:33807860:C:G	33582793	33582793	0	1.03e-05	0.79921	0.178929
ENSG00000150938	CRIM1	chr2	36355927	36551135	rs3770955:36595271:A:T	36368128	36368128	0	4.2e-09	-5.85034	0.973615
ENSG00000171055	FEZ2	chr2	36531806	36646087	rs10189344:36778887:A:C	36551744	36551744	0	1.97e-17	-3.05056	0.342829
ENSG00000279519	RP11-288C18.1	chr2	36839923	36842539	rs75200977:37048168:C:G	36821025	36821025	0	2.6e-08	1.66085	0.29245
ENSG00000279519	RP11-288C18.1	chr2	36839923	36842539	rs62133111:37277299:A:G	37050156	37050156	1	2.28e-05	0.432645	0.100945
ENSG00000115808	STRN	chr2	36843641	36966472	rs12620426:37379869:T:A	37152726	37152726	0	2.43e-09	-1.84986	0.303007
ENSG00000008869	HEATR5B	chr2	36968384	37084342	rs7596489:37307246:G:C	37080103	37080103	0	1.4e-08	3.63283	0.627138
ENSG00000152133	GPATCH11	chr2	37084452	37099244	rs35272517:37325512:T:G	37098369	37098369	0	6.71e-07	-1.78343	0.353138
ENSG00000218739	CEBPZOS	chr2	37196489	37216193	rs79682664:38138141:A:G	37910998	37910998	0	4.71e-05	-2.3167	0.563045
ENSG00000115816	CEBPZ	chr2	37201613	37231713	rs2110965:37472804:T:C	37245661	37245661	0	3.95e-14	-2.79106	0.35575
ENSG00000272054	RP11-423P10.2	chr2	37208876	37212677	rs10779921:37440355:T:C	37213212	37213212	0	8.36e-11	-0.296896	0.0444929
ENSG00000115825	PRKD3	chr2	37250503	37324808	rs3770759	37290123	37290123	0	1.38e-21	-0.641402	0.0633884
ENSG00000115825	PRKD3	chr2	37250503	37324808	rs4670688	37313917	37313917	1	4.97e-14	0.627161	0.0802771
ENSG00000115825	PRKD3	chr2	37250503	37324808	rs138987723:37480564:G:GT	37253421	37253421	2	1.2e-06	1.00129	0.203092
ENSG00000115825	PRKD3	chr2	37250503	37324808	exm187359	37316401	37316401	3	7.78e-06	-0.724848	0.160001
ENSG00000115828	QPCT	chr2	37344575	37373322	rs6711685:37548757:G:C	37321614	37321614	0	1.14e-14	-0.974947	0.121493
ENSG00000115828	QPCT	chr2	37344575	37373322	rs11675003:37627268:A:G	37400125	37400125	1	8.24e-10	-1.28181	0.203734
ENSG00000115828	QPCT	chr2	37344575	37373322	rs12105781:37221567:T:C	36994424	36994424	2	2.09e-06	0.35074	0.0728448
ENSG00000115841	RMDN2	chr2	37923188	38067142	rs6738875:38153486:T:A	37926343	37926343	0	1.16e-49	1.27111	0.0742988
ENSG00000138061	CYP1B1	chr2	38066974	38109902	rs232555:38321998:C:G	38094856	38094856	0	1.65e-11	-1.16771	0.168407
ENSG00000119787	ATL2	chr2	38294881	38377285	rs5830529:38544944:T:TA	38317802	38317802	0	1.53e-27	-3.95806	0.337266
ENSG00000143889	HNRNPLL	chr2	38561979	38603586	rs111361875:38956015:G:T	38728873	38728873	0	3.32e-10	7.08712	1.09961
ENSG00000143891	GALM	chr2	38665911	38741237	rs111361875:38956015:G:T	38728873	38728873	0	2.8e-08	1.59058	0.280744
ENSG00000115875	SRSF7	chr2	38743600	38751494	rs112011213:38967847:G:A	38740705	38740705	0	4.07e-24	31.3046	2.89283
ENSG00000188010	MORN2	chr2	38875963	38929072	rs3112219:39041928:G:A	38814786	38814786	0	1.14e-05	0.837893	0.188535
ENSG00000214694	ARHGEF33	chr2	38889881	38975449	rs3112167:39094832:C:G	38867690	38867690	0	1.25e-09	-0.501642	0.080641
ENSG00000115904	SOS1	chr2	38981397	39124345	rs58753292:39289139:T:TA	39061998	39061998	0	8.63e-06	-2.40198	0.532916
ENSG00000011566	MAP4K3	chr2	39249267	39437312	rs6714232:38671043:C:T	38443901	38443901	0	4.05e-05	5.2946	1.27565
ENSG00000231312	AC007246.3	chr2	39436638	39665343	rs62136539:39697632:G:C	39470491	39470491	0	3.87e-07	0.810921	0.157125
ENSG00000152154	TMEM178A	chr2	39664983	39717963	rs11677582:39755391:T:C	39528250	39528250	0	5.03e-05	-1.25084	0.30518
ENSG00000183023	SLC8A1	chr2	40097271	40611053	rs62149404:40627873:A:C	40400733	40400733	0	1e-05	-0.316463	0.0707372
ENSG00000183023	SLC8A1	chr2	40097271	40611053	rs1014008:41772545:G:T	41545405	41545405	1	1.11e-05	-0.352252	0.0791357
ENSG00000162878	PKDCC	chr2	42048021	42058528	rs4952398:42288769:T:G	42061629	42061629	0	2.86e-10	-12.1005	1.87021
ENSG00000143924	EML4	chr2	42169351	42332548	rs3732195:42513659:C:G	42286519	42286519	0	1.44e-16	-3.31732	0.384335
ENSG00000115944	COX7A2L	chr2	42333547	42425088	rs222467:42642606:C:A	42415466	42415466	0	1.02e-08	-2.75463	0.470914
ENSG00000162882	HAAO	chr2	42767090	42792593	rs893735:42992023:T:C	42764883	42764883	0	2.75e-07	0.110724	0.0211763
ENSG00000223658	C1GALT1C1L	chr2	43675152	43676322	rs13001285:43903787:T:A	43676648	43676648	0	1.78e-13	0.38397	0.0503547
ENSG00000138036	DYNC2LI1	chr2	43774040	43810010	exm190031	43745960	43745960	0	9.59e-09	-1.43641	0.245059
ENSG00000138036	DYNC2LI1	chr2	43774040	43810010	rs114675100:43963714:T:C	43736575	43736575	1	5.57e-05	0.986353	0.242102
ENSG00000138095	LRPPRC	chr2	43886509	43996005	rs7568481	43918235	43918235	0	3.19e-13	5.30446	0.703605
ENSG00000138078	PREPL	chr2	44316282	44361862	rs11124988:44548282:T:C	44321143	44321143	0	5.02e-06	10.2098	2.2067
ENSG00000259439	RP11-89K21.1	chr2	44921078	44939199	rs10653649:45142713:C:CCAAG	44915574	44915574	0	3.56e-09	3.23021	0.534979
ENSG00000236502	SIX3-AS1	chr2	44940155	44941873	rs1561227	44938250	44938250	0	3.42e-14	-0.801551	0.101893
ENSG00000138083	SIX3	chr2	44941899	44946077	exm2255385	44944703	44944703	0	5.53e-07	-3.34875	0.657972
ENSG00000170577	SIX2	chr2	45005162	45009430	rs2944665	45067347	45067347	0	1.38e-34	-1.34916	0.0997779
ENSG00000116016	EPAS1	chr2	46293668	46386703	rs2711302:46220888:A:G	45993749	45993749	0	1.37e-06	19.8654	4.05085
ENSG00000250565	ATP6V1E2	chr2	46490751	46542557	rs3754553:46769135:T:C	46541996	46541996	0	5e-21	-0.873365	0.0876863
ENSG00000119729	RHOQ	chr2	46541807	46583121	rs13420857:46798005:C:G	46570866	46570866	0	2.93e-06	-3.98666	0.84045
ENSG00000151665	PIGF	chr2	46580938	46617119	rs6749716	46862723	46862723	0	3.84e-05	0.511962	0.122964
ENSG00000119878	CRIPT	chr2	46616417	46625742	rs6544907:46868319:T:C	46641180	46641180	0	1.91e-14	-1.11949	0.140816
ENSG00000279254	RP11-536C12.1	chr2	46668871	46670778	rs5830918:46894082:C:CT	46666943	46666943	0	8.48e-18	0.612274	0.067954
ENSG00000279254	RP11-536C12.1	chr2	46668871	46670778	rs4618102:46878928:T:C	46651789	46651789	1	7.93e-15	-0.552962	0.0684716
ENSG00000180398	MCFD2	chr2	46901871	46941855	rs35433380:47136950:G:T	46909811	46909811	0	1.16e-34	-1.01158	0.0747113
ENSG00000180398	MCFD2	chr2	46901871	46941855	rs77796416:47134541:T:G	46907402	46907402	1	3.38e-06	0.805983	0.171038
ENSG00000234690	AC073283.4	chr2	47192406	47345074	rs6727575:47566917:T:G	47339778	47339778	0	5.29e-07	-0.212617	0.0417017
ENSG00000119888	EPCAM	chr2	47345159	47387601	rs72812303:47609287:C:T	47382148	47382148	0	5.46e-35	1.52063	0.111642
ENSG00000119888	EPCAM	chr2	47345159	47387601	rs11896864:47753670:A:G	47526531	47526531	1	2.15e-28	-0.724609	0.0605978
ENSG00000095002	MSH2	chr2	47402970	47562311	rs3771272:47658429:T:A	47431290	47431290	0	8.9e-29	-5.87993	0.487684
ENSG00000184261	KCNK12	chr2	47516582	47570939	exm2269053	47566078	47566078	0	8.07e-08	-0.15919	0.0291195
ENSG00000116062	MSH6	chr2	47695531	47810101	rs12616628:48169224:G:C	47942085	47942085	0	5.43e-07	0.359986	0.0706819
ENSG00000116062	MSH6	chr2	47695531	47810101	rs56054034:48087953:GA:G	47860814	47860815	1	3.32e-05	-0.397304	0.0946413
ENSG00000170802	FOXN2	chr2	48314638	48379294	rs79073127:48573895:G:C	48346756	48346756	0	1.65e-29	2.43849	0.199135
ENSG00000272663	RP11-191L17.1	chr2	48440044	48440597	rs4953581:48716878:G:C	48489739	48489739	0	3.19e-05	0.116367	0.0276559
ENSG00000162869	PPP1R21	chr2	48440599	48515391	rs78538011:48668290:C:T	48441151	48441151	0	7.67e-13	-1.08612	0.146623
ENSG00000162869	PPP1R21	chr2	48440599	48515391	rs28489330:48580744:T:A	48353605	48353605	1	6.49e-08	0.455001	0.0826047
ENSG00000068781	STON1-GTF2A1L	chr2	48529926	48776517	exm2255396	48595242	48595242	0	3.06e-32	1.39173	0.107568
ENSG00000282998	RP11-152D8.1	chr2	49202127	49451896	rs12988253:49503873:A:G	49276734	49276734	0	1.75e-10	-0.317776	0.0485069
ENSG00000143942	CHAC2	chr2	53767793	53775196	rs11689950:53924697:A:C	53697560	53697560	0	5.29e-09	0.394639	0.0661264
ENSG00000119737	GPR75	chr2	53852914	53859989	rs17045337:54104615:T:C	53877478	53877478	0	4.54e-06	0.799417	0.171961
ENSG00000068878	PSME4	chr2	53864068	53970840	rs35772199:53932134:G:C	53704997	53704997	0	1.45e-05	-1.86696	0.42526
ENSG00000170634	ACYP2	chr2	53970839	54305300	rs7597034:54062024:T:G	53834887	53834887	0	5.68e-11	-1.04136	0.154605
ENSG00000272156	RP11-477N3.1	chr2	54082555	54085066	rs3930909:54204922:C:T	53977785	53977785	0	1.67e-08	0.291871	0.0506638
ENSG00000177994	C2orf73	chr2	54330035	54383742	rs10196726:54568287:A:G	54341150	54341150	0	5.34e-25	0.791504	0.0715608
ENSG00000177994	C2orf73	chr2	54330035	54383742	rs17189876:54583590:A:G	54356453	54356453	1	3.52e-14	-0.509025	0.0647423
ENSG00000115306	SPTBN1	chr2	54456286	54671445	rs6732751:54957416:G:A	54730279	54730279	0	2.55e-11	0.562593	0.0819573
ENSG00000115306	SPTBN1	chr2	54456286	54671445	rs77204007:55002503:C:T	54775366	54775366	1	3.6e-08	-0.977169	0.173899
ENSG00000115306	SPTBN1	chr2	54456286	54671445	rs17189876:54583590:A:G	54356453	54356453	2	9.77e-06	-0.304058	0.0678761
ENSG00000214595	EML6	chr2	54723500	54972025	rs4671977:55037005:G:C	54809868	54809868	0	4.96e-09	-3.2288	0.539993
ENSG00000115310	RTN4	chr2	54972188	55112621	rs2255112:55200800:T:G	54973664	54973664	0	1.66e-33	-68.0762	5.13628
ENSG00000162994	CLHC1	chr2	55174792	55232563	rs17046778:55459373:T:G	55232237	55232237	0	2.96e-20	0.884731	0.0908524
ENSG00000162994	CLHC1	chr2	55174792	55232563	rs10197309:55411858:G:T	55184722	55184722	1	1.19e-12	0.496999	0.0676976
ENSG00000143947	RPS27A	chr2	55231904	55235853	rs77518853:55439051:C:G	55211915	55211915	0	1.93e-05	-22.7502	5.2601
ENSG00000162997	PRORSD1P	chr2	55282320	55284522	rs144230251:55602900:G:C	55375764	55375764	0	7.9e-11	1.85107	0.277024
ENSG00000240401	AC012358.8	chr2	55282351	55346049	rs150570652:55961277:G:A	55734142	55734142	0	5.82e-08	0.630094	0.113964
ENSG00000115355	CCDC88A	chr2	55287843	55419921	rs7558687:55560347:C:A	55333211	55333211	0	6.54e-07	5.38713	1.06558
ENSG00000275052	PPP4R3B	chr2	55547293	55618880	rs13006502:55757011:T:C	55529875	55529875	0	3.23e-08	3.59206	0.637016
ENSG00000272606	RP11-554J4.1	chr2	55617910	55618373	rs10200159:55845109:T:C	55617974	55617974	0	3.36e-18	-0.923364	0.101114
ENSG00000115380	EFEMP1	chr2	55865968	55924139	rs141894936:56215657:AAGGAATG:A	55988522	55988529	0	7.97e-10	26.153	4.15318
ENSG00000233251	AC007743.1	chr2	56173535	56185770	rs34460791:56408985:CT:C	56181850	56181851	0	2.96e-06	0.180468	0.0380642
ENSG00000231043	AC007238.1	chr2	58460293	58462032	rs73931797:59230344:A:T	59003209	59003209	0	4.34e-05	-0.645881	0.156228
ENSG00000115421	PAPOLG	chr2	60756231	60802085	rs141527502:60976163:G:GAAC	60749028	60749028	0	6.06e-09	-1.19315	0.200743
ENSG00000162924	REL	chr2	60881522	60931610	rs34507093:61131540:TA:T	60904405	60904406	0	1.3e-05	1.43272	0.324501
ENSG00000267520	RP11-373L24.1	chr2	60925910	60931610	rs67135710:61148283:TAGA:T	60921148	60921151	0	3.37e-07	-1.04229	0.200887
ENSG00000237522	NONOP2	chr2	60936820	60938049	rs72807425:61058051:G:C	60830916	60830916	0	5.64e-05	-0.349099	0.0857534
ENSG00000162927	PUS10	chr2	60940223	61018259	rs10496090:61254033:T:C	61026898	61026898	0	7.16e-14	0.826802	0.106557
ENSG00000162928	PEX13	chr2	61017226	61051990	rs17539345:61250101:A:C	61022966	61022966	0	1.58e-07	0.933879	0.174976
ENSG00000162929	KIAA1841	chr2	61065872	61138034	rs112552455:61293199:C:T	61066064	61066064	0	1.98e-06	1.48992	0.308724
ENSG00000274769	RP11-493E12.3	chr2	61115788	61164825	rs34486439:61309780:G:A	61082645	61082645	0	4.52e-05	-0.726216	0.17607
ENSG00000212978	AC016747.3	chr2	61141593	61144969	rs6741734	61180110	61180110	0	3.27e-11	0.629588	0.0922532
ENSG00000212978	AC016747.3	chr2	61141593	61144969	rs34493725:61118309:C:T	60891174	60891174	1	4.55e-05	-0.394209	0.0956173
ENSG00000237651	C2orf74	chr2	61145069	61164829	rs33998984:61380508:T:C	61153373	61153373	0	3.73e-80	4.3239	0.179119
ENSG00000173209	AHSA2	chr2	61177419	61191203	rs2600667:61404931:A:T	61177796	61177796	0	9.84e-37	-0.939949	0.0669131
ENSG00000173209	AHSA2	chr2	61177419	61191203	rs2592495:61369787:T:C	61142652	61142652	1	3.72e-23	0.784332	0.074291
ENSG00000173209	AHSA2	chr2	61177419	61191203	rs199638788:61466434:G:GTCAC	61239299	61239299	2	6.03e-07	0.394578	0.0777968
ENSG00000173209	AHSA2	chr2	61177419	61191203	rs138440301:61618367:G:A	61391232	61391232	3	8.27e-06	-1.21656	0.269338
ENSG00000173209	AHSA2	chr2	61177419	61191203	rs143888242:62190166:G:A	61963031	61963031	4	3.18e-05	-0.750377	0.178303
ENSG00000115464	USP34	chr2	61187464	61470769	rs6733446:61806999:C:T	61579864	61579864	0	4.38e-07	-7.11223	1.38472
ENSG00000270820	RP11-355B11.2	chr2	61471189	61484130	rs35987809:61781155:CA:C	61554020	61554021	0	3.78e-10	0.462896	0.0720661
ENSG00000270820	RP11-355B11.2	chr2	61471189	61484130	rs11902573:61663095:G:A	61435960	61435960	1	5.19e-05	0.428801	0.10481
ENSG00000170264	FAM161A	chr2	61824855	61854143	rs368470075:62075959:A:T	61848824	61848824	0	2.34e-14	1.35366	0.170885
ENSG00000170264	FAM161A	chr2	61824855	61854143	rs4271754:62047358:C:G	61820223	61820223	1	3.24e-17	0.716305	0.0811016
ENSG00000170340	B3GNT2	chr2	62196114	62224731	rs13015124:62624460:T:C	62397325	62397325	0	4.78e-05	0.450986	0.109706
ENSG00000228541	AC093159.1	chr2	62463128	62464070	rs59264438:62588604:A:G	62361469	62361469	0	2.36e-13	0.271103	0.0357471
ENSG00000186889	TMEM17	chr2	62500222	62511894	exm197134	62506054	62506054	0	2.3e-12	-0.596895	0.0824407
ENSG00000143951	WDPCP	chr2	63121384	63827843	rs12329383	63245115	63245115	0	8.96e-07	-0.513145	0.10281
ENSG00000233716	AC074367.1	chr2	63232454	63233577	rs12471158:63481534:A:G	63254399	63254399	0	6.36e-22	-0.656338	0.0642596
ENSG00000233716	AC074367.1	chr2	63232454	63233577	rs11687645:63562369:T:A	63335234	63335234	1	3.07e-05	0.297986	0.0706661
ENSG00000014641	MDH1	chr2	63588610	63607197	rs9749862:63628544:C:T	63401409	63401409	0	3.31e-11	-7.32512	1.07367
ENSG00000143952	VPS54	chr2	63892147	64019072	rs10496105:64320746:G:A	64093612	64093612	0	5.07e-06	-1.8227	0.394123
ENSG00000197329	PELI1	chr2	64092653	64144454	rs61504639:64350863:C:G	64123729	64123729	0	5.19e-14	-0.586628	0.0751498
ENSG00000197329	PELI1	chr2	64092653	64144454	2:63373549:T:G	63146414	63146414	1	1.94e-07	1.28259	0.242108
ENSG00000225889	AC074289.1	chr2	64143240	64252859	rs2555444:64499044:A:G	64271910	64271910	0	1.76e-19	-0.61276	0.064417
ENSG00000225889	AC074289.1	chr2	64143240	64252859	rs2422116	64193102	64193102	1	1.53e-05	0.303916	0.0694162
ENSG00000119862	LGALSL	chr2	64453970	64461381	rs9284770:64663006:C:G	64435872	64435872	0	2.63e-06	-9.90604	2.07853
ENSG00000115902	SLC1A4	chr2	64988478	65023865	rs7585341:65220909:T:C	64993775	64993775	0	6.95e-25	1.00587	0.0911971
ENSG00000115902	SLC1A4	chr2	64988478	65023865	rs113756095:64684769:C:A	64457635	64457635	1	1.96e-05	1.0576	0.24476
ENSG00000011523	CEP68	chr2	65056367	65087004	rs66513608:65358818:T:TAA	65131684	65131684	0	1.77e-09	0.546999	0.0887981
ENSG00000011523	CEP68	chr2	65056367	65087004	rs7562809:65278144:G:C	65051010	65051010	1	3.24e-08	-0.626915	0.111178
ENSG00000138071	ACTR2	chr2	65227754	65271253	rs11698:65497262:A:G	65270128	65270128	0	3.37e-16	-0.656956	0.0771483
ENSG00000138071	ACTR2	chr2	65227754	65271253	rs12463467:65474578:C:T	65247444	65247444	1	2.53e-05	0.304896	0.0715382
ENSG00000143971	ETAA1	chr2	67397320	67410545	rs76623705:67624799:C:G	67397667	67397667	0	9.6e-06	1.20159	0.268009
ENSG00000143971	ETAA1	chr2	67397320	67410545	rs12986934:67492046:A:G	67264914	67264914	1	6.24e-06	-0.331722	0.0724433
ENSG00000243667	WDR92	chr2	68122937	68157560	rs2290116:68365561:T:C	68138429	68138429	0	3.48e-07	-0.582595	0.112417
ENSG00000115946	PNO1	chr2	68157845	68176238	rs200243991:68345261:TAAATAAA:T	68118129	68118136	0	1.35e-05	-1.28194	0.290885
ENSG00000221823	PPP3R1	chr2	68178858	68256237	rs12994570	68186216	68186216	0	4.92e-17	0.668732	0.0761985
ENSG00000221823	PPP3R1	chr2	68178858	68256237	rs62156553:67533093:C:T	67305961	67305961	1	1.67e-06	-0.387954	0.0797829
ENSG00000221823	PPP3R1	chr2	68178858	68256237	rs145256468:68429538:TTTG:T	68202406	68202409	2	3.41e-05	0.319931	0.0763309
ENSG00000273275	RP11-474G23.2	chr2	68179834	68180532	rs70949683:68431485:G:GAT	68204353	68204353	0	1.75e-09	-0.167309	0.0271511
ENSG00000119865	CNRIP1	chr2	68284172	68320051	rs13025842:68546449:G:A	68319317	68319317	0	2.2e-05	1.80859	0.421193
ENSG00000163219	ARHGAP25	chr2	68679602	68826833	rs3969864:68901608:T:C	68674476	68674476	0	4.28e-08	-0.257855	0.0461571
ENSG00000169599	NFU1	chr2	69395751	69437628	rs6733537:69672151:A:G	69445019	69445019	0	1.41e-05	-0.703108	0.159942
ENSG00000115977	AAK1	chr2	69457998	69674349	rs11688141:69704970:G:T	69477838	69477838	0	1.29e-06	-13.386	2.72306
ENSG00000196975	ANXA4	chr2	69644426	69827100	rs10496171	69788049	69788049	0	2.08e-14	4.01841	0.506196
ENSG00000179818	PCBP1-AS1	chr2	69962264	70103220	rs113012284:70325673:T:C	70098541	70098541	0	9.18e-10	-2.23944	0.356988
ENSG00000115998	C2orf42	chr2	70149881	70248615	rs113197365:70427696:G:A	70200564	70200564	0	7.67e-08	-1.0383	0.189588
ENSG00000116005	PCYOX1	chr2	70257387	70281191	rs199985130:70491399:GT:G	70264267	70264268	0	6.36e-05	-4.83692	1.19673
ENSG00000035141	FAM136A	chr2	70295976	70302090	rs3771530:70164805:G:C	69937673	69937673	0	6.3e-06	-0.632028	0.138084
ENSG00000075340	ADD2	chr2	70607619	70768225	rs11901731:71029990:C:T	70802858	70802858	0	1.59e-06	-4.89081	1.00376
ENSG00000152672	CLEC4F	chr2	70808644	70820600	rs66468957:71114291:T:C	70887161	70887161	0	2.59e-47	-12.586	0.759962
ENSG00000231386	AC007395.4	chr2	70810799	70811474	rs66468957:71114291:T:C	70887161	70887161	0	1.47e-11	-0.870211	0.125178
ENSG00000231386	AC007395.4	chr2	70810799	70811474	rs10198077:70781174:C:T	70554042	70554042	1	1.03e-05	-0.520234	0.116465
ENSG00000116031	CD207	chr2	70830215	70835822	rs66468957:71114291:T:C	70887161	70887161	0	1.95e-36	-1.51855	0.108661
ENSG00000116031	CD207	chr2	70830215	70835822	rs201509008:71054905:C:CAAAG	70827774	70827774	1	6.24e-05	-0.291453	0.0720233
ENSG00000116035	VAX2	chr2	70900591	70933446	rs6733407:71152758:G:A	70925628	70925628	0	1.08e-05	0.319133	0.0715942
ENSG00000116035	VAX2	chr2	70900591	70933446	rs67396654:71786559:C:T	71559429	71559429	1	3.01e-05	-1.10384	0.261519
ENSG00000116039	ATP6V1B1	chr2	70935883	70965406	rs77276916:71153436:C:T	70926306	70926306	0	2.28e-05	-1.31843	0.307616
ENSG00000144031	ANKRD53	chr2	70978381	70985499	rs60499273:71204588:T:TAGACCACGGTCCGCC	70977458	70977458	0	2.2e-07	-0.424058	0.0804211
ENSG00000144031	ANKRD53	chr2	70978381	70985499	rs11372261:71581473:C:CT	71354343	71354343	1	3.76e-05	0.394694	0.094689
ENSG00000144043	TEX261	chr2	70985939	70994945	rs7583998:71217538:G:A	70990408	70990408	0	2.02e-08	6.98111	1.2192
ENSG00000124357	NAGK	chr2	71064345	71079805	rs68023366:71233863:C:G	71006733	71006733	0	2.01e-07	0.456937	0.0863622
ENSG00000124357	NAGK	chr2	71064345	71079805	rs2287331:71294552:A:G	71067422	71067422	1	2.77e-07	-0.409709	0.0783693
ENSG00000124383	MPHOSPH10	chr2	71130315	71150101	rs357740:71378689:G:A	71151559	71151559	0	7.71e-08	0.955904	0.174581
ENSG00000124374	PAIP2B	chr2	71182740	71227083	rs141421255:71391783:A:T	71164653	71164653	0	4.56e-14	-0.601263	0.0768406
ENSG00000124374	PAIP2B	chr2	71182740	71227083	rs34964345:71593493:GA:G	71366363	71366364	1	2.13e-09	-0.519941	0.0848445
ENSG00000075292	ZNF638	chr2	71276562	71435069	rs17743415:71562503:T:C	71335373	71335373	0	1.19e-18	-10.3414	1.11598
ENSG00000135636	DYSF	chr2	71453723	71686768	rs78820776:71494353:T:C	71267223	71267223	0	1.14e-16	0.922218	0.106456
ENSG00000135636	DYSF	chr2	71453723	71686768	rs144983575:71602115:AT:A	71374985	71374986	1	5.17e-06	-0.504683	0.109231
ENSG00000144040	SFXN5	chr2	72942037	73075619	rs150924610:73273186:A:AAAAACAACCATGGCTTCC	73046057	73046057	0	1.03e-06	-2.13123	0.429458
ENSG00000135617	PRADC1	chr2	73228007	73233238	rs34363861:73490412:A:G	73263284	73263284	0	3.64e-09	0.416255	0.0689816
ENSG00000135617	PRADC1	chr2	73228007	73233238	rs72846979:73135151:C:T	72908022	72908022	1	4.15e-05	-1.26243	0.304574
ENSG00000135624	CCT7	chr2	73233421	73253021	rs1018342	73244525	73244525	0	8.15e-13	0.520676	0.0703772
ENSG00000135624	CCT7	chr2	73233421	73253021	rs2901390:73279493:G:A	73052364	73052364	1	1.06e-05	-0.558074	0.125073
ENSG00000163013	FBXO41	chr2	73254683	73284431	rs13020419:73440902:T:C	73213774	73213774	0	6.93e-09	1.03081	0.174133
ENSG00000163016	ALMS1P1	chr2	73644920	73685576	rs112833082:73851204:GTCC:G	73624077	73624080	0	2.85e-52	1.06943	0.0603793
ENSG00000144048	DUSP11	chr2	73762185	73780157	rs77305288:74261322:T:A	74034195	74034195	0	3.93e-05	-0.924544	0.222374
ENSG00000144048	DUSP11	chr2	73762185	73780157	rs34526970:73863864:GA:G	73636737	73636738	1	6.01e-05	-0.354446	0.0874004
ENSG00000124356	STAMBP	chr2	73828917	73873659	rs111703599:74078915:C:T	73851788	73851788	0	2.73e-05	3.11298	0.733502
ENSG00000187605	TET3	chr2	73986405	74108176	rs28534414:74222859:C:A	73995732	73995732	0	9.01e-06	-1.97511	0.439153
ENSG00000257800	FNBP1P1	chr2	74120681	74123218	rs828844:74354479:T:G	74127352	74127352	0	5.04e-18	1.08466	0.119474
ENSG00000217702	RP11-287D1.4	chr2	74130584	74135395	rs4563249:74354016:G:T	74126889	74126889	0	3.8e-105	1.05866	0.0351088
ENSG00000163170	BOLA3	chr2	74135399	74147994	rs828888:74372678:A:C	74145551	74145551	0	1.19e-19	1.09885	0.114918
ENSG00000114978	MOB1A	chr2	74152529	74178898	rs34655105:74397851:C:CA	74170724	74170724	0	9.73e-17	-1.64817	0.189784
ENSG00000188687	SLC4A5	chr2	74216243	74343414	exm204560	74474697	74474697	0	3.3e-07	21.2887	4.09981
ENSG00000159239	C2orf81	chr2	74393837	74421662	rs2129602:75175032:G:A	74947905	74947905	0	6.56e-06	0.625267	0.136879
ENSG00000115274	INO80B	chr2	74455024	74457960	rs6546907:74678921:T:C	74451794	74451794	0	8.69e-06	-0.820651	0.182135
ENSG00000115275	MOGS	chr2	74461058	74465410	rs6546916:74872278:A:C	74645151	74645151	0	3.48e-08	1.02244	0.181765
ENSG00000115275	MOGS	chr2	74461058	74465410	rs363691:74841569:C:T	74614442	74614442	1	1.31e-05	0.516673	0.117064
ENSG00000204822	MRPL53	chr2	74471959	74473322	rs11430107:74722126:C:CA	74494999	74494999	0	3.03e-06	-0.658662	0.139082
ENSG00000115282	TTC31	chr2	74483074	74494886	rs12617294:74512808:G:A	74285681	74285681	0	1.23e-05	2.22186	0.50177
ENSG00000144045	DQX1	chr2	74518132	74526336	2:75310736:T:G	75083609	75083609	0	4.77e-06	0.387845	0.0836244
ENSG00000115307	AUP1	chr2	74526646	74529939	rs2021725:74802217:A:G	74575090	74575090	0	2.71e-06	2.55749	0.537274
ENSG00000236209	AC104135.2	chr2	74919556	74924846	rs12366:75185856:G:T	74958729	74958729	0	2.12e-62	0.459462	0.0229268
ENSG00000115350	POLE4	chr2	74958493	74970128	rs1982788:75170639:T:G	74943512	74943512	0	5.84e-31	0.76955	0.0610009
ENSG00000115350	POLE4	chr2	74958493	74970128	rs186105805:75188803:T:C	74961676	74961676	1	1.34e-05	-0.977718	0.221788
ENSG00000270571	RP11-355F16.1	chr2	75154367	75189949	rs11413386:75456089:T:TA	75228963	75228963	0	4.31e-06	0.200354	0.0429964
ENSG00000115364	MRPL19	chr2	75646784	75690851	rs34827428:75876190:T:G	75649064	75649064	0	3.16e-38	-1.9139	0.132825
ENSG00000005436	GCFC2	chr2	75652001	75710989	rs7590674:75926238:G:C	75699112	75699112	0	5.88e-08	0.676036	0.122316
ENSG00000270996	RP11-342K6.4	chr2	75719121	75720018	rs370339707:75902885:C:A	75675759	75675759	0	4.87e-07	0.497274	0.0972158
ENSG00000270996	RP11-342K6.4	chr2	75719121	75720018	rs33915308:75928122:G:C	75700996	75700996	1	2.56e-06	-0.39511	0.0827954
ENSG00000270996	RP11-342K6.4	chr2	75719121	75720018	Ancestry_MIDDLEEAST_Cluster139_chr2_75459144	75232018	75232018	2	7.11e-06	0.342213	0.0752071
ENSG00000176204	LRRTM4	chr2	76747720	77593319	rs371433909:76114141:CA:C	75887015	75887016	0	1.52e-05	0.885949	0.202318
ENSG00000163541	SUCLG1	chr2	84423524	84460045	rs4832103	84607468	84607468	0	8.09e-09	-2.39899	0.407167
ENSG00000115423	DNAH6	chr2	84516456	84819589	rs7561462:84686757:A:G	84459633	84459633	0	5.03e-44	-2.61013	0.165296
ENSG00000152291	TGOLN2	chr2	85318021	85328425	exm206855	85326957	85326957	0	2.57e-13	-4.20615	0.555531
ENSG00000042445	RETSAT	chr2	85342089	85354620	rs11890883:85568033:A:T	85340910	85340910	0	1.81e-18	1.93996	0.21059
ENSG00000042493	CAPG	chr2	85394749	85418432	rs11696093:85636195:T:C	85409072	85409072	0	1.15e-13	0.817228	0.106275
ENSG00000115486	GGCX	chr2	85544724	85561547	rs10700825:85773654:C:CTG	85546531	85546531	0	1.73e-64	4.86982	0.237328
ENSG00000168883	USP39	chr2	85602857	85649282	rs11544042:85843348:C:T	85616225	85616225	0	1.4e-12	-2.84583	0.388949
ENSG00000168887	C2orf68	chr2	85606655	85612066	rs374731788:85840085:CT:C	85612962	85612963	0	2.39e-07	1.13263	0.21546
ENSG00000115525	ST3GAL5	chr2	85839145	85889014	rs35448325:86063614:GA:G	85836491	85836492	0	1.17e-06	4.03413	0.817222
ENSG00000068654	POLR1A	chr2	86020217	86106155	exm-rs1075622	86110807	86110807	0	2.1e-52	5.54152	0.312327
ENSG00000132305	IMMT	chr2	86143933	86195770	rs375769510:86399078:GTA:G	86171955	86171957	0	7.18e-28	-3.68305	0.311555
ENSG00000132313	MRPL35	chr2	86199356	86213794	rs139833482:86463993:G:A	86236870	86236870	0	4.86e-10	-1.15091	0.180363
ENSG00000132313	MRPL35	chr2	86199356	86213794	rs2367205:86447376:C:G	86220253	86220253	1	4.06e-09	-0.860291	0.143027
ENSG00000068615	REEP1	chr2	86213994	86338083	rs17438451:86438600:T:C	86211477	86211477	0	1.03e-44	-6.77963	0.42498
ENSG00000115561	CHMP3	chr2	86503432	86563479	rs2292887:86705565:T:C	86478442	86478442	0	9.67e-24	3.49632	0.326191
ENSG00000239305	RNF103	chr2	86603394	86623866	rs6716701:86612136:C:T	86385013	86385013	0	6.04e-06	1.02701	0.223934
ENSG00000153561	RMND5A	chr2	86720174	86778041	rs199773190:87200839:CT:C	86973716	86973717	0	3.09e-06	-0.415108	0.0877268
ENSG00000153561	RMND5A	chr2	86720174	86778041	2:86150424:C:CT	85923301	85923301	1	4.81e-05	-0.324649	0.0789977
ENSG00000183281	PLGLB1	chr2	87002560	87021852	rs28665479:87156568:A:G	86929445	86929445	0	3.25e-10	-0.476502	0.0738932
ENSG00000183281	PLGLB1	chr2	87002560	87021852	rs6709175	86881088	86881088	1	2.87e-05	-0.391176	0.0924241
ENSG00000231259	AC125232.1	chr2	87031816	87053069	rs1460507:87317017:A:G	87089894	87089894	0	1.35e-26	-4.26626	0.371415
ENSG00000234231	AC093616.4	chr2	87700985	87738105	rs7573463:87315054:C:T	87087931	87087931	0	1.7e-48	2.30532	0.136922
ENSG00000125551	PLGLB2	chr2	87748088	87758793	rs199516415:87163927:A:C	86936804	86936804	0	3.69e-37	0.949884	0.0671257
ENSG00000125551	PLGLB2	chr2	87748088	87758793	rs59215244:87117692:GAAA:G	86890569	86890572	1	5.41e-08	0.533762	0.0963023
ENSG00000185304	RGPD2	chr2	87755956	87825952	rs140356449:88876706:G:A	88577188	88577188	0	5.81e-06	10.1037	2.19897
ENSG00000144115	THNSL2	chr2	88170296	88186636	rs34185550:88436839:T:C	88137320	88137320	0	5.62e-06	0.323204	0.0702286
ENSG00000144115	THNSL2	chr2	88170296	88186636	rs10202136:88442147:G:A	88142628	88142628	1	1.03e-43	1.14962	0.0731422
ENSG00000144115	THNSL2	chr2	88170296	88186636	rs56027847:88453438:A:G	88153919	88153919	2	3.78e-12	1.00537	0.140333
ENSG00000144115	THNSL2	chr2	88170296	88186636	rs10198979:88469104:A:T	88169585	88169585	3	1.21e-09	-0.491491	0.0789393
ENSG00000153574	RPIA	chr2	88691645	88750935	rs59981047:89008272:AT:A	88708754	88708755	0	3.21e-10	-0.393419	0.0609863
ENSG00000283196	RP4-614C10.2	chr2	89542843	89585652	rs148258119:90437386:A:G	90336651	90336651	0	2.92e-06	-1.37041	0.288867
ENSG00000143429	AC027612.6	chr2	91617161	91659972	rs376197140:91709650:CTA:C	91530781	91530783	0	6.91e-05	0.553002	0.137515
ENSG00000213355	CNN2P8	chr2	94737338	94738249	rs1364395:96195632:T:C	95529884	95529884	0	1.41e-05	-0.810838	0.18444
ENSG00000144029	MRPS5	chr2	95087208	95149434	rs191977771:95361534:T:A	94695807	94695807	0	9.22e-08	-3.44512	0.633133
ENSG00000144026	ZNF514	chr2	95147331	95165413	rs1852300:95341388:C:T	94675663	94675663	0	1.59e-10	-0.509319	0.077552
ENSG00000144026	ZNF514	chr2	95147331	95165413	rs2278067:95955680:G:T	95289932	95289932	1	2.17e-14	0.535058	0.0674525
ENSG00000144026	ZNF514	chr2	95147331	95165413	rs5832794:95834169:CA:C	95168424	95168425	2	8.06e-09	-0.478608	0.0812217
ENSG00000144026	ZNF514	chr2	95147331	95165413	rs114028954:95649637:A:G	94983892	94983892	3	1.79e-08	1.80014	0.313172
ENSG00000144026	ZNF514	chr2	95147331	95165413	rs141506949:95553925:G:A	94888180	94888180	4	5.67e-10	-1.2247	0.192715
ENSG00000144026	ZNF514	chr2	95147331	95165413	rs2059313:96207952:A:G	95542204	95542204	5	6.17e-08	-0.372806	0.0675628
ENSG00000144026	ZNF514	chr2	95147331	95165413	rs148001062:95791263:G:A	95125518	95125518	6	6.59e-05	-0.933447	0.231453
ENSG00000275111	ZNF2	chr2	95165433	95184317	rs191977771:95361534:T:A	94695807	94695807	0	0.000229689	-0.628623	0.169092
ENSG00000155066	PROM2	chr2	95274454	95291308	2:95746590:CT:C	95080845	95080846	0	2.51e-05	1.09325	0.256432
ENSG00000155066	PROM2	chr2	95274454	95291308	rs12615758:95671751:G:A	95006006	95006006	1	0.000140659	-0.508242	0.132214
ENSG00000115041	KCNIP3	chr2	95297305	95386083	rs111803884:95859866:CT:C	95194118	95194119	0	2.01e-22	0.414905	0.0400725
ENSG00000272913	RP11-440D17.3	chr2	95525110	95526702	rs189877528:96546352:G:A	95880604	95880604	0	1.33e-05	-0.812806	0.18428
ENSG00000272913	RP11-440D17.3	chr2	95525110	95526702	rs114873791:95700437:C:T	95034692	95034692	1	0.00020918	-0.721266	0.192747
ENSG00000232931	LINC00342	chr2	95807119	95816215	rs56791141:96587496:C:T	95921748	95921748	0	8.04e-14	2.58305	0.333631
ENSG00000174501	ANKRD36C	chr2	95836920	95991831	rs34233881:96545259:G:A	95879511	95879511	0	3.81e-17	0.579997	0.0658287
ENSG00000174501	ANKRD36C	chr2	95836920	95991831	rs35071802:97402064:T:C	96736327	96736327	1	0.000138765	0.273384	0.0710541
ENSG00000084090	STARD7	chr2	96184860	96208825	rs10171471:96847036:T:C	96181298	96181298	0	1.78e-27	-8.96067	0.764679
ENSG00000204685	STARD7-AS1	chr2	96208417	96242621	rs4426565:97051981:C:T	96386243	96386243	0	1.16e-05	0.378213	0.0851788
ENSG00000204685	STARD7-AS1	chr2	96208417	96242621	rs2320433	95391263	95391263	1	7.32e-05	0.272371	0.0679653
ENSG00000135956	TMEM127	chr2	96248517	96265994	2:97075538:TCTC:T	96409800	96409803	0	1.81e-08	2.41464	0.420246
ENSG00000144028	SNRNP200	chr2	96274337	96305515	rs59979953:97014447:G:A	96348709	96348709	0	4.34e-31	21.2156	1.67739
ENSG00000198885	ITPRIPL1	chr2	96325332	96330517	rs612017:97094011:A:T	96428274	96428274	0	5.45e-08	0.221198	0.0399188
ENSG00000121152	NCAPH	chr2	96335788	96373845	rs4907311:97011362:C:T	96345624	96345624	0	7.44e-52	0.7121	0.0404244
ENSG00000158158	CNNM4	chr2	96760903	96811891	rs145496851:97194637:A:C	96528900	96528900	0	1.93e-16	32.7289	3.80925
ENSG00000168763	CNNM3	chr2	96816246	96833911	rs55993211:97882417:A:T	97216680	97216680	0	3.29e-06	2.65532	0.562732
ENSG00000213337	ANKRD39	chr2	96836612	96858095	rs62152902:97569119:C:T	96903382	96903382	0	8.76e-05	0.551727	0.139214
ENSG00000144199	FAHD2B	chr2	97083584	97094882	rs74175487:97979522:C:T	97314328	97314328	0	3.88e-06	0.575809	0.122963
ENSG00000230606	AC159540.1	chr2	97416166	97433527	rs372138121:97928911:T:C	97263174	97263174	0	5.99e-07	19.5514	3.85385
ENSG00000196912	ANKRD36B	chr2	97492664	97589965	rs11688407:98164532:C:T	97548069	97548069	0	6.62e-22	-3.81821	0.374008
ENSG00000135940	COX5B	chr2	97646041	97648383	rs921423:98708410:T:A	98091947	98091947	0	7.95e-05	-1.31756	0.33045
ENSG00000115073	ACTR1B	chr2	97655964	97664107	exm214567	97658891	97658891	0	1.22e-21	3.82562	0.377506
ENSG00000075568	TMEM131	chr2	97756334	97995891	rs112520695:98735208:C:CTAAAA	98118745	98118745	0	4.25e-05	-2.51342	0.607261
ENSG00000222000	AC092675.3	chr2	98331390	98356005	rs6742930:98924921:T:C	98308458	98308458	0	1.06e-18	0.202118	0.0217747
ENSG00000040933	INPP4A	chr2	98444855	98594390	exm-rs12618769	98623468	98623468	0	3.97e-08	-1.98014	0.353555
ENSG00000115446	UNC50	chr2	98608580	98618515	rs76011628:99183981:G:A	98567518	98567518	0	7.35e-05	1.58262	0.395019
ENSG00000071073	MGAT4A	chr2	98619107	98731126	rs9308813:99263380:G:C	98646917	98646917	0	1.53e-22	2.2164	0.213377
ENSG00000135951	TSGA10	chr2	98997262	99154964	rs13035357:99752246:C:T	99135783	99135783	0	6e-80	3.41477	0.141741
ENSG00000241962	RP11-111H13.1	chr2	99141486	99322741	rs55851325:98975469:A:C	98359006	98359006	1	3.99e-05	-0.444313	0.10696
ENSG00000273045	C2orf15	chr2	99141486	99151487	rs34412914:99754030:A:AT	99137567	99137567	0	8.1e-09	0.243167	0.0412718
ENSG00000144182	LIPT1	chr2	99154956	99163157	rs2632284:99775865:C:G	99159402	99159402	0	6.41e-40	1.0972	0.0740544
ENSG00000158411	MITD1	chr2	99161428	99181058	rs35439305:99754349:CA:C	99137886	99137887	0	2.31e-10	-2.1041	0.323414
ENSG00000144214	LYG1	chr2	99284239	99304742	rs9753373:100000654:C:T	99384191	99384191	0	5.24e-07	0.137085	0.0268781
ENSG00000158417	EIF5B	chr2	99337354	99401326	rs70940169:99962406:CA:C	99345943	99345944	0	1.82e-05	3.00024	0.691639
ENSG00000144218	AFF3	chr2	99545420	100142739	rs4556997:100814858:C:A	100198396	100198396	0	2.42e-05	-1.68119	0.393478
ENSG00000170500	LONRF2	chr2	100273292	100322733	rs13006224:100917109:C:T	100300647	100300647	0	4.92e-55	0.946797	0.0515999
ENSG00000170500	LONRF2	chr2	100273292	100322733	rs184118488:100938205:G:A	100321743	100321743	1	1.81e-05	0.531596	0.122506
ENSG00000204634	TBC1D8	chr2	101007618	101252866	rs6727200:101698144:G:A	101081682	101081682	0	6.82e-13	-0.713447	0.0960841
ENSG00000204634	TBC1D8	chr2	101007618	101252866	rs6759692:101739211:C:T	101122749	101122749	1	1.6e-06	-0.381777	0.0783772
ENSG00000272902	RP11-299H21.1	chr2	101151661	101155412	rs7603503:101819666:A:G	101203204	101203204	0	1.11e-05	0.171239	0.0384689
ENSG00000163162	RNF149	chr2	101271220	101308701	rs78228034:101722151:T:C	101105689	101105689	0	1.94e-08	1.17456	0.204862
ENSG00000163162	RNF149	chr2	101271220	101308701	rs11123853:101524476:G:A	100908014	100908014	1	3.24e-05	0.411689	0.0979362
ENSG00000175874	CREG2	chr2	101345552	101387595	rs116287156:102003962:T:C	101387500	101387500	0	2.5e-07	0.42157	0.0803288
ENSG00000281162	LINC01127	chr2	101962057	101987167	rs12469799:102592454:A:G	101975992	101975992	0	3.54e-08	0.420912	0.0748707
ENSG00000281162	LINC01127	chr2	101962057	101987167	rs4851542:102745921:G:A	102129461	102129461	1	3.25e-05	-1.21478	0.289036
ENSG00000115602	IL1RL1	chr2	102311503	102352037	rs4616497:103469980:C:T	102853521	102853521	0	7.08e-06	1.80474	0.396543
ENSG00000115604	IL18R1	chr2	102311530	102398775	rs7568913:102920037:T:C	102303577	102303577	0	6.54e-09	-0.143362	0.0241749
ENSG00000115616	SLC9A2	chr2	102619708	102711318	rs5833029:103230563:AATGG:A	102614104	102614108	0	1.28e-13	0.194795	0.0253826
ENSG00000135953	MFSD9	chr2	102715841	102736888	rs141315404:103415225:G:A	102798766	102798766	0	3.07e-18	0.89388	0.097761
ENSG00000170417	TMEM182	chr2	102736909	102843893	rs11123942:103266497:G:A	102650038	102650038	0	3.78e-05	0.212121	0.0508994
ENSG00000198914	POU3F3	chr2	104855512	104858574	rs72828259:105251554:C:A	104635096	104635096	0	4.72e-05	0.150923	0.0366837
ENSG00000135972	MRPS9	chr2	105037984	105099960	rs112210401:105697380:AC:A	105080922	105080923	0	1.41e-32	-0.965798	0.074164
ENSG00000135972	MRPS9	chr2	105037984	105099960	rs11901492:105621510:C:G	105005052	105005052	1	4.98e-08	0.380664	0.0684873
ENSG00000272994	RP11-332H14.2	chr2	105334028	105337475	rs3749068:105911396:A:G	105294939	105294939	0	3.82e-17	-0.595381	0.0675785
ENSG00000272994	RP11-332H14.2	chr2	105334028	105337475	rs112875062:106581977:G:A	105965521	105965521	1	1.58e-06	-1.10329	0.226389
ENSG00000272994	RP11-332H14.2	chr2	105334028	105337475	2:105916911:TC:T	105300454	105300455	2	3.95e-05	-0.28824	0.0693458
ENSG00000135974	C2orf49	chr2	105337360	105349211	rs2576748:105911258:C:A	105294801	105294801	0	1.69e-08	-1.85963	0.322955
ENSG00000115641	FHL2	chr2	105357713	105438513	rs12712206	105395699	105395699	0	1.52e-09	0.610059	0.0986184
ENSG00000071051	NCK2	chr2	105744898	105894274	rs2377341:106518501:G:C	105902045	105902045	0	7.49e-15	-0.8816	0.109057
ENSG00000071051	NCK2	chr2	105744898	105894274	2:106219009:G:A	105602552	105602552	1	1.7e-05	-0.630294	0.144772
ENSG00000115652	UXS1	chr2	106093304	106194339	rs13032985:106825742:C:G	106209286	106209286	0	1.65e-05	-0.669174	0.153448
ENSG00000153165	RGPD3	chr2	106391291	106468376	rs4676198:107086184:C:T	106469728	106469728	0	2.01e-07	-0.5367	0.101445
ENSG00000144057	ST6GAL2	chr2	106801601	106887108	rs12471465:107611137:G:T	106994681	106994681	0	1.24e-40	-0.878592	0.0586247
ENSG00000144057	ST6GAL2	chr2	106801601	106887108	rs140935158:107547704:T:G	106931248	106931248	1	2.79e-07	1.56837	0.300101
ENSG00000144057	ST6GAL2	chr2	106801601	106887108	rs112586118:107987716:T:C	107371260	107371260	2	1.06e-05	-0.481837	0.108023
ENSG00000196862	RGPD4	chr2	107826938	107890841	rs832330:108510531:A:G	107894075	107894075	0	2.48e-30	-1.10484	0.0886993
ENSG00000198203	SULT1C2	chr2	108288640	108309915	rs2198466:108926967:A:T	108310511	108310511	0	1.98e-08	0.199406	0.0348018
ENSG00000135968	GCC2	chr2	108448562	108509415	rs142279487:108542840:C:T	107926384	107926384	0	5.69e-05	7.27009	1.78683
ENSG00000163006	CCDC138	chr2	108786758	108885477	rs201191699:109422472:AGT:A	108806016	108806018	0	1.58e-12	0.627009	0.085916
ENSG00000172985	SH3RF3	chr2	109129349	109504632	rs4074384:109994191:C:A	109377735	109377735	0	6.46e-22	0.693173	0.0678785
ENSG00000186522	SEPTIN10	chr2	109542983	109614206	2:109213371:GTT:G	108596915	108596917	0	6.63e-05	-0.962818	0.23882
ENSG00000256977	LIMS3	chr2	109898429	109934429	rs12469095:109529701:G:A	108913245	108913245	0	5.77e-09	0.339083	0.0569667
ENSG00000204588	LINC01123	chr2	109987064	109996140	rs116337889:110440178:A:G	109682601	109682601	0	6.06e-07	0.811929	0.16011
ENSG00000204588	LINC01123	chr2	109987064	109996140	rs112880632:111676757:G:C	110919180	110919180	1	3.04e-06	-0.800994	0.169156
ENSG00000175701	LINC00116	chr2	110211530	110245420	2:111183442:G:T	110425865	110425865	0	4.02e-05	-0.673621	0.16223
ENSG00000175772	LINC01106	chr2	110375139	110384442	rs112880632:111676757:G:C	110919180	110919180	0	5.47e-07	0.741299	0.145593
ENSG00000183054	RGPD6	chr2	110513813	110577185	rs2670632:111586327:G:T	110828750	110828750	0	0.000102801	6.23924	1.59035
ENSG00000153094	BCL2L11	chr2	111119379	111168447	rs12233011:112641283:A:G	111883706	111883706	0	6.92e-10	-0.459659	0.0727173
ENSG00000153094	BCL2L11	chr2	111119379	111168447	rs7567444:111863438:T:C	111105861	111105861	1	2.24e-10	-0.458655	0.0704484
ENSG00000153107	ANAPC1	chr2	111766272	111884690	rs147174701:112478327:A:G	111720750	111720750	0	9.19e-10	-2.2256	0.354798
ENSG00000153208	MERTK	chr2	111898480	112029561	rs56097910:112761369:G:A	112003792	112003792	0	1.33e-16	1.57537	0.182292
ENSG00000153208	MERTK	chr2	111898480	112029561	2:112621979:CA:C	111864402	111864403	1	1.25e-05	-0.404746	0.091486
ENSG00000153208	MERTK	chr2	111898480	112029561	rs72823500:112695386:T:G	111937809	111937809	2	3.12e-05	0.68803	0.163317
ENSG00000153214	TMEM87B	chr2	112055224	112119318	rs35845828:112800544:GT:G	112042967	112042968	0	4.3e-15	-0.545547	0.0668371
ENSG00000153214	TMEM87B	chr2	112055224	112119318	rs186497152:112896793:T:C	112139216	112139216	1	3.33e-07	-0.379744	0.0731559
ENSG00000153214	TMEM87B	chr2	112055224	112119318	rs6737824:113776670:A:T	113019093	113019093	2	1.82e-06	-0.348672	0.0719721
ENSG00000144152	FBLN7	chr2	112138386	112188216	rs7577442:112881614:C:T	112124037	112124037	0	5.19e-33	-0.777784	0.0592327
ENSG00000144152	FBLN7	chr2	112138386	112188216	rs4849050	112181971	112181971	1	1.08e-05	0.446641	0.100205
ENSG00000278962	RP11-399B17.1	chr2	112188365	112190635	rs7580507:112879209:A:G	112121632	112121632	0	1.95e-39	-0.803013	0.054626
ENSG00000144161	ZC3H8	chr2	112211526	112255136	rs141182111:113109952:CTCTT:C	112352375	112352379	0	3.14e-07	1.01815	0.195707
ENSG00000169629	RGPD8	chr2	112370093	112434488	2:113129847:A:G	112372270	112372270	0	7.91e-48	-1.22392	0.0733701
ENSG00000169629	RGPD8	chr2	112370093	112434488	rs199623454:113145468:T:C	112387891	112387891	1	2.03e-06	0.353548	0.0733341
ENSG00000114999	TTL	chr2	112482155	112541739	rs4849076:113315090:C:T	112557513	112557513	0	3.15e-07	0.904412	0.173855
ENSG00000125630	POLR1B	chr2	112541916	112577150	rs7586668:113319186:C:T	112561609	112561609	0	6.65e-18	-0.599549	0.0663054
ENSG00000125630	POLR1B	chr2	112541916	112577150	rs62158585:113306827:A:G	112549250	112549250	1	1.44e-09	0.762202	0.123013
ENSG00000231747	AC079922.2	chr2	112621810	112622167	exm2265342	112631655	112631655	0	3.06e-18	-0.837277	0.0915657
ENSG00000237753	AC079922.3	chr2	112641833	112645690	rs6542069:113392181:C:T	112634604	112634604	0	2.96e-25	0.888208	0.079806
ENSG00000237753	AC079922.3	chr2	112641833	112645690	rs36076008:113313335:G:A	112555758	112555758	1	1.3e-05	1.22371	0.277117
ENSG00000144136	SLC20A1	chr2	112645858	112663827	exm2265342	112631655	112631655	0	4.07e-17	7.8945	0.896936
ENSG00000189223	PAX8-AS1	chr2	113211523	113276581	rs4849177:113982584:T:C	113225007	113225007	0	1.72e-52	-0.981968	0.0552825
ENSG00000189223	PAX8-AS1	chr2	113211523	113276581	rs59544264:114430401:TCA:T	113672824	113672826	1	2.67e-07	-0.358361	0.0684572
ENSG00000189223	PAX8-AS1	chr2	113211523	113276581	rs2277884:114035750:C:A	113278173	113278173	2	2.2e-05	-0.588315	0.137
ENSG00000125618	PAX8	chr2	113215998	113278950	rs2863243:113989267:T:C	113231690	113231690	0	3.23e-11	-1.04671	0.153328
ENSG00000136682	CBWD2	chr2	113437692	113496189	rs74713283:114245499:T:C	113487922	113487922	0	2.4e-45	-11.007	0.683611
ENSG00000146556	WASH2P	chr2	113588551	113599043	rs59544264:114430401:TCA:T	113672824	113672826	0	8.35e-23	-3.59314	0.343501
ENSG00000236397	DDX11L2	chr2	113599037	113601261	rs145623386:114425697:CCA:C	113668120	113668122	0	2.25e-76	2.56267	0.110176
ENSG00000279267	RP11-395L14.18	chr2	113605868	113607908	rs115979374:114360270:T:G	113602693	113602693	0	6.47e-36	1.93356	0.13963
ENSG00000240356	RPL23AP7	chr2	113610503	113627090	rs3207085:114367471:C:T	113609894	113609894	0	9.51e-08	0.423929	0.0779923
ENSG00000240356	RPL23AP7	chr2	113610503	113627090	rs199646941:114369746:CT:C	113612169	113612170	1	3.33e-17	-0.671492	0.0760586
ENSG00000240356	RPL23AP7	chr2	113610503	113627090	rs114676503:114361603:A:C	113604026	113604026	2	6.84e-06	-0.342337	0.0750947
ENSG00000144134	RABL2A	chr2	113627230	113643396	rs72611940:114380985:G:A	113623408	113623408	0	6.2e-10	-1.95347	0.308119
ENSG00000115084	SLC35F5	chr2	113705012	113756823	rs10532985:114487356:TATA:T	113729779	113729782	0	3.11e-07	-0.50385	0.0968127
ENSG00000115084	SLC35F5	chr2	113705012	113756823	rs35880605:114531514:CA:C	113773937	113773938	1	4.77e-06	-0.391487	0.0844133
ENSG00000115091	ACTR3	chr2	113889961	113962596	rs6710631:114403635:C:T	113646058	113646058	0	9.2e-08	-1.82459	0.335295
ENSG00000175497	DPP10	chr2	114442300	115845752	rs2420815:116078442:C:T	115320866	115320866	0	7.47e-11	-1.32216	0.197597
ENSG00000235026	DPP10-AS1	chr2	115130936	115161343	rs13021135:115914096:A:C	115156519	115156519	0	1.87e-06	-0.0853659	0.0176421
ENSG00000088205	DDX18	chr2	117814651	117832379	rs11689073:118573396:A:G	117815820	117815820	0	1.89e-09	2.1247	0.345572
ENSG00000125629	INSIG2	chr2	118088453	118110997	rs1559509	118098351	118098351	0	4.85e-11	-2.60963	0.385978
ENSG00000186132	C2orf76	chr2	119302226	119366828	rs11679101:120078414:T:C	119320838	119320838	0	3.36e-09	-0.276904	0.0457846
ENSG00000171227	TMEM37	chr2	119429902	119438520	rs2587692:120209689:A:G	119452113	119452113	0	2.46e-11	-0.710864	0.103476
ENSG00000171227	TMEM37	chr2	119429902	119438520	rs12386162:120185069:A:G	119427493	119427493	1	1.16e-05	0.330557	0.0744508
ENSG00000171227	TMEM37	chr2	119429902	119438520	rs72834816:120247928:C:A	119490352	119490352	2	2.71e-05	-0.876488	0.206442
ENSG00000163075	CFAP221	chr2	119544433	119662251	rs2587689:120282715:T:A	119525139	119525139	0	2.04e-07	-0.363636	0.0687748
ENSG00000163075	CFAP221	chr2	119544433	119662251	rs72833837:121294008:G:A	120536432	120536432	1	2.08e-05	0.81783	0.189854
ENSG00000144120	TMEM177	chr2	119679168	119686507	rs116355307:120448050:A:G	119690474	119690474	0	1.28e-18	-1.47515	0.159351
ENSG00000144120	TMEM177	chr2	119679168	119686507	rs73948943:120432619:A:G	119675043	119675043	1	3.03e-10	0.609872	0.0944045
ENSG00000088179	PTPN4	chr2	119759632	119983818	rs181672543:119744152:G:A	118986576	118986576	0	3.01e-05	6.10857	1.44717
ENSG00000115109	EPB41L5	chr2	120013006	120179119	rs36027189:120932044:G:GA	120174468	120174468	0	3.13e-12	5.78799	0.804626
ENSG00000226479	TMEM185B	chr2	120221279	120223408	exm2273819	120222852	120222852	0	1.54e-12	-0.678827	0.0929619
ENSG00000260634	RP11-521O16.1	chr2	127024253	127025723	rs934826:127825968:G:A	127068392	127068392	0	5.98e-10	0.166119	0.0261768
ENSG00000136717	BIN1	chr2	127048028	127107355	rs10538293:127863046:T:C	127105470	127105470	0	1.62e-19	0.62676	0.0658168
ENSG00000136717	BIN1	chr2	127048028	127107355	rs10189896:127866347:G:A	127108771	127108771	1	2.35e-06	-0.346232	0.0722777
ENSG00000163161	ERCC3	chr2	127257291	127294176	rs4150474:128033327:C:A	127275751	127275751	0	9.76e-29	3.48961	0.289678
ENSG00000169967	MAP3K2	chr2	127298731	127388465	rs12469821:128315579:T:C	127558004	127558004	0	3.42e-05	-2.7761	0.662387
ENSG00000236682	AC068282.3	chr2	127389131	127400580	rs13034157:128153807:C:T	127396231	127396231	0	4.29e-140	2.69699	0.0683793
ENSG00000144231	POLR2D	chr2	127843552	127858157	rs6430955:128592648:G:A	127835074	127835074	0	7.44e-15	-1.03766	0.128347
ENSG00000136731	UGGT1	chr2	128091201	128195677	rs4531877:128861294:A:G	128103720	128103720	0	5.91e-08	4.98681	0.902442
ENSG00000225449	RAB6C-AS1	chr2	129966593	129980466	rs55778502:130736848:A:AATATCTT	129979275	129979275	0	2.02e-07	0.178019	0.0336554
ENSG00000136699	SMPD4	chr2	130151393	130182750	rs150962599:131871534:A:G	131113961	131113961	0	1.26e-06	3.18315	0.646752
ENSG00000213225	NOC2LP1	chr2	130229380	130232106	rs62163064:130869609:A:G	130112036	130112036	0	1.5e-07	-0.49123	0.0918684
ENSG00000136718	IMP4	chr2	130342226	130347810	rs6729562:131079526:C:T	130321953	130321953	0	1.12e-26	2.0075	0.174445
ENSG00000072135	PTPN18	chr2	130356008	130375409	rs9967795:131131866:A:G	130374293	130374293	0	1.47e-21	-2.73148	0.270142
ENSG00000178162	FAR2P2	chr2	130416756	130431363	rs144830943:131217878:C:A	130460305	130460305	0	2.95e-06	-2.51356	0.530122
ENSG00000136698	CFC1	chr2	130592169	130599575	2:131459033:A:C	130701460	130701460	0	1.28e-07	-0.543085	0.100969
ENSG00000240253	FAR2P3	chr2	130690134	130718831	rs59603842:131170840:CT:C	130413267	130413268	0	2.39e-09	-0.31007	0.0507688
ENSG00000136002	ARHGEF4	chr2	130836917	131047263	rs72861480:131719739:G:T	130962166	130962166	0	1.19e-06	3.1856	0.645857
ENSG00000115762	PLEKHB2	chr2	131104848	131353709	rs144656322:131908348:GAC:G	131150775	131150777	0	2.66e-11	-11.2823	1.64523
ENSG00000173272	MZT2A	chr2	131464901	131492743	rs60079614:132246941:GT:G	131489368	131489369	0	3.95e-22	1.11144	0.108202
ENSG00000173272	MZT2A	chr2	131464901	131492743	rs12988424:132250093:T:G	131492520	131492520	1	4.11e-05	-0.374983	0.0904135
ENSG00000152117	AC093838.4	chr2	131492814	131521573	rs12468676:132233063:G:A	131475490	131475490	0	1.18e-76	-1.40189	0.0601035
ENSG00000152117	AC093838.4	chr2	131492814	131521573	rs72864783:132327188:T:G	131569615	131569615	1	5.85e-06	-0.535415	0.116562
ENSG00000197927	C2orf27A	chr2	131722376	131767404	rs6720375:132440073:G:C	131682500	131682500	0	2.66e-18	0.312404	0.0340968
ENSG00000163046	ANKRD30BL	chr2	132147592	132257969	rs3114247:132918389:C:T	132160816	132160816	0	2.29e-08	-0.157636	0.0276409
ENSG00000224043	CCNT2-AS1	chr2	134735465	134918710	rs10432370:135607854:C:T	134850284	134850284	0	1.14e-05	-0.123828	0.0278543
ENSG00000082258	CCNT2	chr2	134918236	134959342	rs66839618:135678923:A:AT	134921353	134921353	0	3.22e-09	2.55762	0.422351
ENSG00000176601	MAP3K19	chr2	134964492	135047468	rs13402101:135785066:T:A	135027496	135027496	0	1.13e-05	-0.296008	0.0665651
ENSG00000115839	RAB3GAP1	chr2	135052266	135176394	rs72293220:135995963:C:CT	135238393	135238393	0	6.45e-05	-3.07117	0.760529
ENSG00000144224	UBXN4	chr2	135741620	135785055	rs67886411:136501964:CAAATT:C	135744394	135744399	0	1.96e-07	-19.4947	3.68166
ENSG00000076003	MCM6	chr2	135839627	135876426	rs10539209:136636813:ACT:A	135879243	135879245	0	9.4e-06	0.726029	0.161768
ENSG00000231890	DARS-AS1	chr2	135985177	136022593	rs201691594:136693966:C:CT	135936396	135936396	0	1.81e-09	-0.813536	0.132149
ENSG00000150540	HNMT	chr2	137964021	138016364	rs10185017	138151782	138151782	0	7.14e-09	0.949397	0.160521
ENSG00000237772	AC092620.3	chr2	138604511	138613167	rs35595094:139325556:G:A	138567986	138567986	0	3.46e-06	-0.774019	0.16442
ENSG00000168702	LRP1B	chr2	140231424	142131701	rs10211565	142131585	142131585	0	3.53e-17	-0.574209	0.0650987
ENSG00000168702	LRP1B	chr2	140231424	142131701	rs10928125:142555475:G:A	141797906	141797906	1	9.33e-10	0.422979	0.0674573
ENSG00000168702	LRP1B	chr2	140231424	142131701	rs374736257:142240713:G:A	141483144	141483144	2	2.63e-06	1.39706	0.293105
ENSG00000115919	KYNU	chr2	142877499	143055832	rs444863:143784193:A:G	143026624	143026624	0	7.56e-12	-0.199822	0.0283186
ENSG00000169554	ZEB2	chr2	144384082	144524583	rs200101140:146059672:AT:A	145302104	145302105	0	5.58e-06	-11.332	2.4615
ENSG00000121989	ACVR2A	chr2	147844518	147930826	rs70992173:148570502:AT:A	147812933	147812934	0	4.42e-11	1.40223	0.206937
ENSG00000115947	ORC4	chr2	147930398	148021604	2:148529577:T:C	147772008	147772008	0	1.56e-05	-5.34943	1.22315
ENSG00000187123	LYPD6	chr2	149329986	149474148	rs111975562:150413745:A:C	149557231	149557231	0	4.59e-08	1.60158	0.287351
ENSG00000187123	LYPD6	chr2	149329986	149474148	rs56168173:150790231:A:G	149933717	149933717	1	5.31e-06	1.2475	0.270332
ENSG00000184898	RBM43	chr2	151247941	151261879	rs2278089	151290158	151290158	0	9.61e-06	-0.352585	0.0786462
ENSG00000080345	RIF1	chr2	151409884	151508013	rs146388415:152447845:G:GC	151591331	151591331	0	6.52e-05	-2.04975	0.507898
ENSG00000183091	NEB	chr2	151485337	151734487	rs74532673:152550727:T:C	151694213	151694213	0	1.44e-12	1.39721	0.191089
ENSG00000183091	NEB	chr2	151485337	151734487	rs6729101	151789297	151789297	1	5.29e-16	0.669369	0.079181
ENSG00000162980	ARL5A	chr2	151788985	151828492	rs2345154:152687242:T:A	151830728	151830728	0	1.66e-05	-1.38822	0.318428
ENSG00000283228	CTD-2021K4.1	chr2	151802652	151973949	rs113697916:151790567:T:TA	150934053	150934053	0	3.55e-05	1.79961	0.430343
ENSG00000182389	CACNB4	chr2	151832769	152099475	rs6756595:152839789:G:A	151983275	151983275	0	3.49e-05	-0.747192	0.1785
ENSG00000115145	STAM2	chr2	152116802	152175992	rs4664080:152978341:G:A	152121827	152121827	0	5.67e-16	2.23448	0.264616
ENSG00000157827	FMNL2	chr2	152335238	152649834	rs72866485:152664438:T:C	151807924	151807924	0	3.5e-05	-2.5297	0.604408
ENSG00000144278	GALNT13	chr2	153871914	154453849	rs113795648:154877151:C:A	154020638	154020638	0	1.96e-15	-3.20079	0.386937
ENSG00000123612	ACVR1C	chr2	157526768	157629005	rs12614487:158434569:C:T	157578057	157578057	0	1.48e-07	0.427113	0.0798287
ENSG00000144283	PKP4	chr2	158456965	158682879	rs1608037	158237065	158237065	0	1.4e-06	0.341605	0.0697267
ENSG00000144283	PKP4	chr2	158456965	158682879	rs76635962:159250254:A:T	158393742	158393742	1	1.37e-05	1.34492	0.30539
ENSG00000163331	DAPL1	chr2	158795318	158862958	rs70994228:159663053:T:TA	158806541	158806541	0	8.62e-24	-1.07761	0.100407
ENSG00000163331	DAPL1	chr2	158795318	158862958	rs1554514:159778008:G:A	158921496	158921496	1	8.34e-06	-0.407981	0.090361
ENSG00000251491	OR7E28P	chr2	158862312	158863285	rs56056398:159707126:G:A	158850614	158850614	0	8.46e-26	-0.740188	0.0656483
ENSG00000251491	OR7E28P	chr2	158862312	158863285	rs35942423:159725812:T:A	158869300	158869300	1	1.68e-09	1.06974	0.173396
ENSG00000196151	WDSUB1	chr2	159235794	159286799	rs72229999:160143010:ACGCCCCGCGCGAGCAGGCCCAGC:A	159286499	159286522	0	2.22e-43	-1.71091	0.109402
ENSG00000224152	AC009506.1	chr2	159615297	159617082	rs67258446:160407977:CAAAA:C	159551466	159551470	0	5.52e-06	1.28657	0.279317
ENSG00000226266	AC009961.3	chr2	159670709	159712435	rs55884912:160645681:AT:A	159789170	159789171	0	3.01e-18	-0.28049	0.0306679
ENSG00000241399	CD302	chr2	159768631	159798255	rs1344632	159828920	159828920	0	6.2e-07	-0.338497	0.0668127
ENSG00000241399	CD302	chr2	159768631	159798255	rs35227137:160575356:T:C	159718845	159718845	1	1.06e-06	-0.664964	0.134157
ENSG00000054219	LY75	chr2	159803356	159904749	rs66496937:160738509:A:G	159881998	159881998	0	2.41e-18	-1.2442	0.135603
ENSG00000144290	SLC4A10	chr2	161424333	161985282	rs1515185:162559426:T:C	161702916	161702916	0	6.68e-28	-20.6361	1.74443
ENSG00000197635	DPP4	chr2	161992242	162074542	rs2098525:162958136:C:T	162101626	162101626	0	1.55e-05	0.198335	0.0453406
ENSG00000182263	FIGN	chr2	163593397	163736012	rs35314562:164588224:GA:G	163731714	163731715	0	5.07e-05	0.857761	0.209383
ENSG00000115290	GRB14	chr2	164492813	164621848	rs12692723:165437736:C:G	164581226	164581226	0	8.17e-07	-0.407963	0.0814262
ENSG00000115290	GRB14	chr2	164492813	164621848	rs4425091	164634715	164634715	1	3e-05	0.309133	0.073218
ENSG00000169507	SLC38A11	chr2	164896187	164955525	rs10184126:165826943:G:T	164970433	164970433	0	3.63e-08	0.142895	0.0254381
ENSG00000178662	CSRNP3	chr2	165469648	165689407	rs7600830:166303284:C:T	165446774	165446774	0	2.45e-07	-2.45586	0.467615
ENSG00000115339	GALNT3	chr2	165747592	165794682	rs16851176	165864109	165864109	0	8.87e-21	0.956012	0.0966772
ENSG00000115339	GALNT3	chr2	165747592	165794682	rs9973361:166716499:T:A	165859989	165859989	1	1.14e-10	-0.469926	0.070969
ENSG00000235192	AC009495.2	chr2	165794852	165810010	rs1023708:166719594:A:G	165863084	165863084	0	1.68e-07	0.129538	0.0243247
ENSG00000123607	TTC21B	chr2	165857476	165953843	rs2304002:166714095:G:A	165857585	165857585	0	8.07e-08	-1.63218	0.298555
ENSG00000236107	AC010127.3	chr2	165957400	166301784	rs4386334:167011681:C:A	166155171	166155171	0	1.41e-06	-0.103236	0.0210799
ENSG00000169432	SCN9A	chr2	166195186	166375993	rs77579497:167219736:A:G	166363226	166363226	0	2.63e-06	3.07036	0.644144
ENSG00000136546	SCN7A	chr2	166403574	166494247	rs7593452	166466012	166466012	0	1.59e-05	-4.50119	1.03035
ENSG00000235335	AC016723.4	chr2	167814775	167941144	rs4349315:168681405:G:T	167824895	167824895	0	9.97e-17	0.650041	0.0748794
ENSG00000235335	AC016723.4	chr2	167814775	167941144	rs78443282:168904231:A:G	168047721	168047721	1	1.68e-07	-0.682975	0.128247
ENSG00000235335	AC016723.4	chr2	167814775	167941144	rs147341238:168664269:T:A	167807759	167807759	2	1.53e-05	0.690387	0.157685
ENSG00000172318	B3GALT1	chr2	167868949	167874041	rs7557358:168614890:T:C	167758380	167758380	0	5.95e-05	0.46089	0.113577
ENSG00000198648	STK39	chr2	167954021	168248141	rs11890527:169031488:T:C	168174978	168174978	0	2.66e-12	-0.605037	0.0838198
ENSG00000198648	STK39	chr2	167954021	168248141	rs6755369:169036091:G:A	168179581	168179581	1	1.13e-11	0.689233	0.0985563
ENSG00000198648	STK39	chr2	167954021	168248141	rs11339372:169008248:CA:C	168151738	168151739	2	8.42e-06	-0.35864	0.0794709
ENSG00000163072	NOSTRIN	chr2	168786540	168865514	rs7584277:169643225:G:A	168786715	168786715	0	4.82e-24	0.978224	0.0905646
ENSG00000152253	SPC25	chr2	168834133	168913371	rs114189440:169776446:G:A	168919936	168919936	0	7.99e-14	-1.06731	0.137836
ENSG00000152254	G6PC2	chr2	168901241	168910000	rs2601066:169269712:T:C	168413202	168413202	0	3.28e-06	10.4787	2.22041
ENSG00000081479	LRP2	chr2	169127110	169362685	rs36016897:170077170:CA:C	169220660	169220661	0	1.09e-36	111.427	7.93828
ENSG00000163093	BBS5	chr2	169479179	169506655	rs11901329:170336659:T:C	169480149	169480149	0	4.55e-07	-2.97273	0.579627
ENSG00000138399	FASTKD1	chr2	169529750	169573875	rs143845376:170387774:C:G	169531264	169531264	0	1.9e-05	-5.18983	1.19906
ENSG00000138398	PPIG	chr2	169584341	169641406	rs62173308:170576381:A:C	169719871	169719871	0	9.01e-06	-2.97434	0.661328
ENSG00000154479	CCDC173	chr2	169645426	169694433	rs140902791:170458918:C:T	169602408	169602408	0	2.96e-11	-2.74422	0.401172
ENSG00000144362	PHOSPHO2	chr2	169694455	169701708	rs116117081:170533111:T:C	169676601	169676601	0	6.3e-06	0.971349	0.212222
ENSG00000144357	UBR3	chr2	169827459	170084131	2:170744293:C:CT	169887783	169887783	0	8.04e-08	4.54422	0.831121
ENSG00000071909	MYO3B	chr2	170178146	170655171	2:171901942:G:GGTCT	171045432	171045432	0	1.2e-05	5.54331	1.25022
ENSG00000204334	ERICH2	chr2	170783787	170798971	rs2356236:171671684:A:G	170815174	170815174	0	7.59e-07	0.158245	0.0314904
ENSG00000071967	CYBRD1	chr2	171522248	171558133	rs112471207:172415930:C:T	171559420	171559420	0	1.03e-17	-0.662535	0.0737422
ENSG00000071967	CYBRD1	chr2	171522248	171558133	rs6732719:172376233:G:C	171519723	171519723	1	1.27e-10	0.541948	0.0820638
ENSG00000071967	CYBRD1	chr2	171522248	171558133	rs76739758:172373335:T:C	171516825	171516825	2	1.26e-07	0.411339	0.0764466
ENSG00000077380	DYNC1I2	chr2	171687410	171748420	rs373690958:172740122:CCTTT:C	171883612	171883616	0	1.91e-07	-3.37968	0.637578
ENSG00000115840	SLC25A12	chr2	171784371	171999859	rs71921844:172594315:AT:A	171737805	171737806	0	6.34e-07	1.89451	0.374266
ENSG00000172878	METAP1D	chr2	171999584	172082430	rs34394102:172808198:C:CA	171951680	171951680	0	4.24e-06	0.405322	0.086916
ENSG00000091409	ITGA6	chr2	172427355	172506282	rs142858678:173309691:TTTTG:T	172444963	172444967	0	7.46e-139	33.3953	0.854334
ENSG00000152256	PDK1	chr2	172555374	172608669	rs11303240:173444432:CT:C	172579704	172579705	0	1.09e-07	-10.5659	1.95311
ENSG00000091428	RAPGEF4	chr2	172735275	173052893	rs11320644:173866117:AC:A	173001389	173001390	0	5.19e-12	1.07837	0.151562
ENSG00000091428	RAPGEF4	chr2	172735275	173052893	rs1991174:173735180:G:C	172870452	172870452	1	3.19e-06	-0.333969	0.0706838
ENSG00000091428	RAPGEF4	chr2	172735275	173052893	rs16860288:173257319:T:C	172392591	172392591	2	5.99e-06	-0.343243	0.0748116
ENSG00000091436	AC013461.1	chr2	173075436	173268010	exm-rs6707813	173058409	173058409	0	1.39e-10	0.523406	0.0794321
ENSG00000091436	AC013461.1	chr2	173075436	173268010	rs62174397:174124391:A:C	173259663	173259663	1	2.22e-06	-0.782164	0.162889
ENSG00000144354	CDCA7	chr2	173354821	173368997	rs35715350:174225146:A:T	173360418	173360418	0	5.24e-09	0.516769	0.0865666
ENSG00000271151	RP11-394I13.2	chr2	173968352	173969418	rs115071937:174798731:G:A	173934003	173934003	0	6.67e-10	-0.172196	0.0272137
ENSG00000138430	OLA1	chr2	174072448	174248698	rs11320666:174589749:TA:T	173725021	173725022	0	1.43e-05	1.66375	0.378622
ENSG00000138433	CIR1	chr2	174348023	174395715	rs149891277:174239533:C:T	173374805	173374805	0	7.51e-06	5.20874	1.14777
ENSG00000144306	SCRN3	chr2	174395731	174429575	rs6738161:175290820:G:A	174426092	174426092	0	5.72e-13	-0.525314	0.0704963
ENSG00000144306	SCRN3	chr2	174395731	174429575	rs12151707:175330938:T:C	174466210	174466210	1	5.67e-09	0.557027	0.0935293
ENSG00000163328	GPR155	chr2	174431572	174487094	rs72919557:175294820:C:T	174430092	174430092	0	4.61e-09	3.78866	0.632263
ENSG00000115935	WIPF1	chr2	174559573	174682916	rs35012591:175561238:A:C	174696510	174696510	0	4.33e-06	0.769993	0.165269
ENSG00000154518	ATP5G3	chr2	175176259	175184607	rs58350508:176042379:TGGAC:T	175177651	175177655	0	8.38e-35	-8.11648	0.597908
ENSG00000144320	KIAA1715	chr2	175923893	176002839	rs56393028:176814163:T:C	175949435	175949435	0	4.77e-14	-0.661622	0.0846237
ENSG00000144320	KIAA1715	chr2	175923893	176002839	rs11682260:176582010:C:G	175717282	175717282	1	2.55e-06	-0.357489	0.0748977
ENSG00000144320	KIAA1715	chr2	175923893	176002839	rs2289966:176794388:C:T	175929660	175929660	2	9.21e-06	-0.655937	0.145999
ENSG00000128654	MTX2	chr2	176269396	176338025	rs112729575:177033144:A:G	176168416	176168416	0	2.31e-05	1.72999	0.403946
ENSG00000280374	RP11-337N6.3	chr2	177317716	177318471	rs35635511:178219935:T:A	177355207	177355207	0	4.45e-06	-0.127371	0.027374
ENSG00000018510	AGPS	chr2	177392645	177559299	rs78896911:178271853:T:C	177407125	177407125	0	9.46e-09	0.569364	0.0970964
ENSG00000018510	AGPS	chr2	177392645	177559299	rs74835321:178254267:G:A	177389539	177389539	1	3.43e-06	-1.54673	0.328432
ENSG00000196659	TTC30B	chr2	177548999	177553014	rs1918345:178510572:C:G	177645844	177645844	0	3.12e-07	0.553015	0.106271
ENSG00000196659	TTC30B	chr2	177548999	177553014	rs13013789:177920136:A:C	177055408	177055408	1	2.77e-05	-0.442688	0.104401
ENSG00000128655	PDE11A	chr2	177623253	178108339	rs1369515:178969434:G:C	178104707	178104707	0	5.65e-09	0.512698	0.0860794
ENSG00000128655	PDE11A	chr2	177623253	178108339	2:179348068:A:T	178483341	178483341	2	5.18e-06	-0.827111	0.17903
ENSG00000128655	PDE11A	chr2	177623253	178108339	rs4893971:178495743:T:C	177631015	177631015	3	2.04e-05	-0.375762	0.0871357
ENSG00000079156	OSBPL6	chr2	178194482	178402891	rs10693473:179018084:T:TAAAG	178153357	178153357	0	1.01e-07	-0.389715	0.0718596
ENSG00000079156	OSBPL6	chr2	178194482	178402891	rs111882666:179362572:C:T	178497845	178497845	1	2.57e-05	-0.507602	0.119218
ENSG00000223960	AC009948.5	chr2	178413940	178440243	rs10930870:180266132:T:C	179401405	179401405	0	4.1e-05	-0.708615	0.170848
ENSG00000204311	DFNB59	chr2	178451437	178461390	2:180066645:T:TATAATAATAATAATAATAATA	179201918	179201918	0	3.01e-05	0.584661	0.1385
ENSG00000155657	TTN	chr2	178525990	178830802	rs13030944:180147388:A:T	179282661	179282661	0	2.04e-05	-0.431061	0.0999743
ENSG00000155657	TTN	chr2	178525990	178830802	2:180048560:G:GGA	179183833	179183833	1	3.51e-05	0.70457	0.168358
ENSG00000270574	RP11-171I2.2	chr2	178578791	178580906	exm247970	178689578	178689578	0	1.74e-06	-0.143326	0.0295278
ENSG00000267784	RP11-171I2.1	chr2	178723458	178727046	rs1017323:179488736:C:T	178624009	178624009	0	1.42e-06	0.534587	0.109185
ENSG00000267784	RP11-171I2.1	chr2	178723458	178727046	rs13425301:180398615:G:T	179533888	179533888	1	6.1e-05	-0.39826	0.098286
ENSG00000163492	CCDC141	chr2	178830270	179050086	rs62175455:179713762:T:A	178849035	178849035	0	4.86e-06	-0.366448	0.0790801
ENSG00000163492	CCDC141	chr2	178830270	179050086	rs114357768:180603970:T:C	179739243	179739243	1	2.21e-05	-1.2088	0.281546
ENSG00000187231	SESTD1	chr2	179101693	179264790	rs12989055:180118407:G:A	179253680	179253680	0	9.41e-07	-4.98687	1.00114
ENSG00000144331	ZNF385B	chr2	179441983	179861505	rs10171283:180308335:C:G	179443608	179443608	0	4.78e-09	-5.29354	0.884344
ENSG00000163510	CWC22	chr2	179944877	180007113	rs4894145:180872251:A:T	180007524	180007524	0	7.63e-26	3.13186	0.277474
ENSG00000170035	UBE2E3	chr2	180967249	181076585	rs13397184:181826233:G:T	180961506	180961506	0	9.67e-10	-1.97677	0.315569
ENSG00000115232	ITGA4	chr2	181457203	181536187	rs72900343:182380071:A:G	181515344	181515344	0	6.03e-09	3.42598	0.576312
ENSG00000188452	CERKL	chr2	181536677	181680665	rs200917645:182416280:TA:T	181551553	181551554	0	1.86e-08	-3.61569	0.629844
ENSG00000162992	NEUROD1	chr2	181673089	181680876	rs6709122:182507723:G:C	181642996	181642996	0	2.56e-14	20.1607	2.54932
ENSG00000138434	SSFA2	chr2	181891834	181930738	rs62178847:181973555:G:A	181108828	181108828	0	3.29e-05	0.756538	0.180138
ENSG00000138434	SSFA2	chr2	181891834	181930738	rs150775467:182454706:AT:A	181589979	181589980	1	5.41e-05	0.530917	0.13009
ENSG00000115252	PDE1A	chr2	182140037	182523192	rs1432520	182227999	182227999	0	1.1e-18	-0.609455	0.0656937
ENSG00000115252	PDE1A	chr2	182140037	182523192	rs58161256:183378337:C:T	182513610	182513610	1	1.2e-28	-1.53642	0.127785
ENSG00000115252	PDE1A	chr2	182140037	182523192	rs3769789:183059200:T:C	182194473	182194473	2	7.28e-06	-0.37497	0.0825021
ENSG00000163002	NUP35	chr2	183117514	183161680	rs10191080:183982833:G:C	183118105	183118105	0	1.3e-07	0.413988	0.0770055
ENSG00000163002	NUP35	chr2	183117514	183161680	rs2705741:183906537:C:T	183041809	183041809	1	1.05e-05	-0.517352	0.115889
ENSG00000163002	NUP35	chr2	183117514	183161680	rs113782208:184057802:G:A	183193074	183193074	2	5.76e-05	-0.776196	0.190911
ENSG00000272800	RP11-438L19.1	chr2	183214320	183215400	rs10183020:184080772:C:T	183216044	183216044	0	4.47e-05	0.067137	0.0162675
ENSG00000226747	AC007966.1	chr2	185719875	185740479	rs78295805:186562987:C:G	185698260	185698260	0	2.55e-97	1.07504	0.0380864
ENSG00000188738	FSIP2	chr2	185738629	185833290	rs13387015:186275499:T:C	185410772	185410772	0	1.19e-21	1.68215	0.16594
ENSG00000231646	FSIP2-AS1	chr2	185783692	185800151	rs71014621:186564811:G:GTATATATATATATATATACA	185700084	185700084	0	7.94e-07	-0.146714	0.0292492
ENSG00000237877	LINC01473	chr2	186032892	186083233	rs72315227:187005249:CTA:C	186140522	186140524	0	2.77e-07	-0.914186	0.17487
ENSG00000237877	LINC01473	chr2	186032892	186083233	rs2595389:187534183:T:G	186669456	186669456	1	7.81e-05	0.27493	0.0688774
ENSG00000138448	ITGAV	chr2	186590066	186680901	rs78455379:187441814:T:A	186577087	186577087	0	1.62e-09	16.1599	2.6166
ENSG00000003436	TFPI	chr2	187464231	187565760	rs12998073:188424763:A:G	187560036	187560036	0	4.84e-12	-0.472244	0.0662716
ENSG00000003436	TFPI	chr2	187464231	187565760	2:187827628:A:G	186962901	186962901	1	3.66e-06	-0.888675	0.189274
ENSG00000204262	COL5A2	chr2	189031897	189179879	rs4666772:189978017:C:T	189113291	189113291	0	4.13e-57	-16.8065	0.892717
ENSG00000115368	WDR75	chr2	189441434	189475565	rs138726519:190319451:G:A	189454725	189454725	0	9.63e-15	-1.78482	0.221766
ENSG00000115368	WDR75	chr2	189441434	189475565	rs71683495:190549555:CA:C	189684829	189684830	1	9.04e-05	0.398608	0.100777
ENSG00000138449	SLC40A1	chr2	189560580	189583758	rs56208508:190442589:T:TGCCTCA	189577863	189577863	0	3.18e-11	0.800882	0.117278
ENSG00000138449	SLC40A1	chr2	189560580	189583758	rs34200358:190422058:AG:A	189557332	189557333	1	1.38e-06	0.395572	0.0807005
ENSG00000138381	ASNSD1	chr2	189661386	189670831	rs7571089:190561793:G:A	189697067	189697067	0	5.07e-115	13.6219	0.41713
ENSG00000128694	OSGEPL1	chr2	189746661	189763227	rs5837169:190764530:T:TTCTC	189899804	189899804	0	8.9e-06	-1.26781	0.281706
ENSG00000273240	RP11-455J20.3	chr2	189763860	189764456	rs138311313:190581547:C:G	189716821	189716821	0	1.54e-17	0.260829	0.0292053
ENSG00000128699	ORMDL1	chr2	189770324	189784371	rs5742985:190661109:A:G	189796383	189796383	0	4.25e-49	1.29496	0.076278
ENSG00000128699	ORMDL1	chr2	189770324	189784371	rs61335355:190791311:CTT:C	189926585	189926587	1	4.6e-07	-0.648221	0.126444
ENSG00000064933	PMS1	chr2	189784086	189877629	rs16831821:190505813:A:G	189641087	189641087	0	4.6e-22	2.74975	0.268182
ENSG00000187699	C2orf88	chr2	189879610	190203484	rs115770474:190663606:C:G	189798880	189798880	0	5.3e-05	0.630073	0.154195
ENSG00000138379	MSTN	chr2	190055698	190062729	rs57566211:190934675:T:C	190069949	190069949	0	7.77e-08	-0.732998	0.133907
ENSG00000198130	HIBCH	chr2	190189736	190344193	exm253053	190296896	190296896	0	2.33e-15	2.56939	0.311508
ENSG00000151689	INPP1	chr2	190343471	190371665	rs1372054:191208347:G:A	190343621	190343621	0	8.92e-15	-0.611708	0.0759038
ENSG00000151689	INPP1	chr2	190343471	190371665	rs57231432:191440057:A:AT	190575331	190575331	1	2.72e-05	0.299032	0.070445
ENSG00000151690	MFSD6	chr2	190408356	190509205	rs10931461:191405280:T:A	190540554	190540554	0	7.88e-07	-2.39588	0.477504
ENSG00000138386	NAB1	chr2	190646747	190692766	rs58515841:191500718:A:T	190635992	190635992	0	2.53e-06	2.52217	0.528244
ENSG00000138378	STAT4	chr2	191029577	191151596	rs4853613:192411653:T:C	191546927	191546927	0	3.14e-11	0.459115	0.0672093
ENSG00000138378	STAT4	chr2	191029577	191151596	rs13006096:192028637:T:C	191163911	191163911	1	8.67e-09	0.498123	0.08472
ENSG00000128641	MYO1B	chr2	191245186	191425389	rs71030331:192117787:G:GA	191253061	191253061	0	2.57e-06	2.94224	0.616658
ENSG00000196950	SLC39A10	chr2	195575978	195737702	rs376527307:196602132:GTGAT:G	195737408	195737412	0	1.21e-20	0.624228	0.0633758
ENSG00000196950	SLC39A10	chr2	195575978	195737702	rs72918625:197538126:C:T	196673402	196673402	1	2.67e-05	0.722947	0.170143
ENSG00000118997	DNAH7	chr2	195737704	196068812	rs116217197:196896235:G:A	196031511	196031511	0	7.89e-33	-8.57691	0.655454
ENSG00000203435	E2F3P2	chr2	195994260	195995680	rs60383977:196914411:T:C	196049687	196049687	0	8.05e-06	-0.158751	0.0351003
ENSG00000081320	STK17B	chr2	196133567	196176503	rs375503496:196299592:CT:C	195434868	195434869	0	8.3e-05	0.180053	0.0452796
ENSG00000119041	GTF3C3	chr2	196763033	196799725	rs34937207:197315213:AT:A	196450489	196450490	0	3.87e-05	-0.427026	0.102605
ENSG00000119041	GTF3C3	chr2	196763033	196799725	rs201628848:198257299:G:GGC	197392575	197392575	1	6.2e-05	0.385296	0.0951805
ENSG00000187944	C2orf66	chr2	196805003	196810276	rs73062959:197694929:T:G	196830205	196830205	0	1.94e-08	-0.345111	0.0601981
ENSG00000197121	PGAP1	chr2	196833005	196927796	rs16859560:197798697:G:T	196933973	196933973	0	1.16e-10	11.6622	1.76174
ENSG00000065413	ANKRD44	chr2	196967018	197311173	rs7591162:197836360:G:A	196971636	196971636	0	5.35e-08	-0.429995	0.0775497
ENSG00000115524	SF3B1	chr2	197389785	197435091	rs200866465:198343620:AT:A	197478896	197478897	0	1.3e-11	-11.0519	1.58523
ENSG00000119042	SATB2	chr2	199269501	199471266	rs116009277:200112851:C:T	199248128	199248128	0	1.08e-14	1.57944	0.196643
ENSG00000119042	SATB2	chr2	199269501	199471266	rs17195804:200123367:G:A	199258644	199258644	1	3.11e-09	-0.410835	0.0677732
ENSG00000226124	FTCDNL1	chr2	199760545	199851173	rs6759018:200620763:T:C	199756040	199756040	0	4.99e-30	-0.35203	0.0284393
ENSG00000162971	TYW5	chr2	199929976	199955736	rs33943305:200794277:AT:A	199929554	199929555	0	3.75e-05	-1.48497	0.356161
ENSG00000163535	SGO2	chr2	200510009	200583782	rs56365733:201485106:T:TG	200620383	200620383	0	5.47e-09	-0.286398	0.048037
ENSG00000138356	AOX1	chr2	200585869	200677064	rs10180210:201508433:G:A	200643710	200643710	0	1.88e-54	1.67228	0.0918098
ENSG00000240344	PPIL3	chr2	200870908	200889303	rs2136600:201742345:C:T	200877622	200877622	0	8.26e-19	-0.732535	0.078649
ENSG00000240344	PPIL3	chr2	200870908	200889303	rs17382934:201644666:A:G	200779943	200779943	1	5.88e-06	0.501351	0.109176
ENSG00000240344	PPIL3	chr2	200870908	200889303	rs57210488:201706347:G:A	200841624	200841624	2	2.43e-05	-0.517454	0.12114
ENSG00000196290	NIF3L1	chr2	200889328	200903930	rs79446796:201716749:G:A	200852026	200852026	0	5.41e-05	3.96904	0.972573
ENSG00000115942	ORC2	chr2	200908974	200963680	rs114491141:202382539:A:G	201517816	201517816	0	9e-06	2.34423	0.52119
ENSG00000155744	FAM126B	chr2	200973719	201071671	rs3888610:201732117:C:T	200867394	200867394	0	1.01e-05	-2.19539	0.491026
ENSG00000064012	CASP8	chr2	201233444	201287711	rs141470809:202160762:C:T	201296039	201296039	0	2.56e-97	-4.4562	0.157873
ENSG00000155749	ALS2CR12	chr2	201288272	201357398	rs6705641:202368441:T:C	201503718	201503718	0	1.84e-07	-0.346343	0.0652441
ENSG00000115993	TRAK2	chr2	201377208	201451579	rs2540328:202249060:C:T	201384337	201384337	0	2.76e-32	-9.19703	0.71022
ENSG00000155754	ALS2CR11	chr2	201487426	201619178	rs34088540:202132405:T:A	201267682	201267682	0	7.45e-08	0.429291	0.0783074
ENSG00000082126	MPP4	chr2	201644871	201698694	rs17384293:202529479:T:C	201664756	201664756	0	8.53e-06	48.0374	10.6517
ENSG00000003393	ALS2	chr2	201700555	201781189	rs16838219:202679085:T:C	201814362	201814362	0	4.3e-08	-2.23482	0.400107
ENSG00000273456	RP11-686O6.2	chr2	202374933	202375604	2:203427559:C:CA	202562836	202562836	0	2.06e-10	0.196392	0.030099
ENSG00000163596	ICA1L	chr2	202773151	202871985	rs78488377:203693277:G:A	202828554	202828554	0	2.64e-08	-1.04626	0.184313
ENSG00000163596	ICA1L	chr2	202773151	202871985	rs4675288:203597414:C:T	202732691	202732691	1	2.75e-05	0.321192	0.0757039
ENSG00000138442	WDR12	chr2	202874783	203014798	rs78404371:203467612:G:T	202602889	202602889	0	6.52e-05	-1.02084	0.252948
ENSG00000138380	CARF	chr2	202912215	202987063	rs72926770:203798585:C:T	202933862	202933862	0	6.84e-20	-0.939247	0.0975086
ENSG00000138380	CARF	chr2	202912215	202987063	rs10587796:203711455:GTCAT:G	202846732	202846736	1	3.27e-08	0.432715	0.0767676
ENSG00000144426	NBEAL1	chr2	203014880	203226378	rs934287:203708307:A:G	202843584	202843584	0	1.34e-05	1.12216	0.254573
ENSG00000138443	ABI2	chr2	203328220	203447723	rs149218255:204695856:AATTT:A	203831133	203831137	0	1.69e-05	-6.34057	1.45606
ENSG00000173166	RAPH1	chr2	203394346	203535410	rs58279659:204484325:A:G	203619602	203619602	0	9.24e-15	-3.4468	0.427958
ENSG00000116117	PARD3B	chr2	204545794	205620162	rs3732082:207041441:G:A	206176717	206176717	0	1.44e-05	-0.675214	0.153756
ENSG00000114933	INO80D	chr2	205993722	206086303	rs75773775:207036440:T:C	206171716	206171716	0	8.21e-16	3.17798	0.378639
ENSG00000023228	NDUFS1	chr2	206114818	206159603	rs1564163	206121904	206121904	0	3.54e-33	-9.12635	0.692851
ENSG00000237580	GCSHP3	chr2	206116111	206116500	2:207030338:AAG:A	206165614	206165616	0	9.49e-06	0.406524	0.0906183
ENSG00000183671	GPR1	chr2	206175317	206218047	rs13392561:207122438:C:T	206257714	206257714	0	2.96e-06	-0.191378	0.0403655
ENSG00000204186	ZDBF2	chr2	206274664	206314428	rs10172343:207242594:T:C	206377870	206377870	0	8.99e-08	-3.40441	0.625099
ENSG00000114948	ADAM23	chr2	206443540	206621130	rs111580190:207185364:G:A	206320640	206320640	0	2.72e-05	1.98026	0.466459
ENSG00000138400	MDH1B	chr2	206737764	206765547	rs140141123:207674545:A:G	206809821	206809821	0	6.37e-50	1.07943	0.0628741
ENSG00000138400	MDH1B	chr2	206737764	206765547	rs144589732:207629963:G:T	206765239	206765239	1	1.86e-15	-2.1936	0.264948
ENSG00000118246	FASTKD2	chr2	206765358	206792509	exm-rs2277912	206769512	206769512	0	4.21e-07	-1.6324	0.317313
ENSG00000118263	KLF7	chr2	207074138	207167267	rs113814941:208039979:C:T	207175255	207175255	0	2.57e-13	-1.77886	0.234953
ENSG00000118260	CREB1	chr2	207529738	207603431	rs141006395:208491129:C:CTTTTGTTTTTGT	207626405	207626405	0	5.99e-05	-1.47188	0.36285
ENSG00000144401	METTL21A	chr2	207580632	207625928	rs16839665:208208814:C:T	207344090	207344090	0	9.56e-07	-0.744663	0.149591
ENSG00000163249	CCNYL1	chr2	207711541	207761839	rs17639938:208617482:G:C	207752758	207752758	0	8.63e-06	-0.694213	0.154021
ENSG00000115020	PIKFYVE	chr2	208266268	208358751	rs13392540:209128814:G:C	208264090	208264090	0	1.85e-14	-0.693988	0.0872388
ENSG00000115020	PIKFYVE	chr2	208266268	208358751	rs56902014:208608816:T:C	207744092	207744092	1	3.77e-06	1.42561	0.304034
ENSG00000144407	PTH2R	chr2	208359715	208854503	rs11693993:209225223:G:A	208360498	208360498	0	5.58e-11	-3.5525	0.527202
ENSG00000078018	MAP2	chr2	209424059	209734118	rs2370830:210661521:A:G	209796797	209796797	0	1.27e-05	-0.413981	0.0936552
ENSG00000078018	MAP2	chr2	209424059	209734118	rs12694198:211327946:T:A	210463222	210463222	1	6.16e-05	0.476382	0.117631
ENSG00000144445	KANSL1L	chr2	210021424	210171383	rs4673501:211024197:A:G	210159473	210159473	0	4.23e-06	0.917627	0.19675
ENSG00000229127	AC007038.7	chr2	210030734	210064356	rs2075116:210882171:A:T	210017447	210017447	0	6.49e-08	0.303052	0.0550166
ENSG00000115365	LANCL1	chr2	210431250	210477652	rs16844516:211337590:T:G	210472866	210472866	0	5.88e-09	4.45489	0.74882
ENSG00000021826	CPS1	chr2	210477683	210679107	rs2371002:211471071:G:A	210606347	210606347	0	2.82e-07	-0.244406	0.0467838
ENSG00000178568	ERBB4	chr2	211375718	212538841	rs905883:213188470:C:T	212323745	212323745	0	3.93e-09	-2.01628	0.334891
ENSG00000270659	RP11-105N14.1	chr2	213152971	213153659	rs35405758:214038397:ACT:A	213173673	213173675	0	9.84e-07	-0.189533	0.0381198
ENSG00000144451	SPAG16	chr2	213284380	214410501	rs7571296:214115522:G:T	213250798	213250798	0	6.32e-06	-0.708595	0.154842
ENSG00000174453	VWC2L	chr2	214411066	214578959	rs10932578	214896989	214896989	0	3.49e-06	0.409901	0.0871111
ENSG00000138376	BARD1	chr2	214725647	214809711	rs13392855:215669746:T:G	214805022	214805022	0	2.77e-33	-0.838285	0.0635123
ENSG00000138376	BARD1	chr2	214725647	214809711	rs11463562:215673218:G:GA	214808494	214808494	1	4.5e-15	0.596314	0.0731163
ENSG00000138376	BARD1	chr2	214725647	214809711	rs114860453:215674619:G:C	214809895	214809895	2	1.03e-11	0.850116	0.121308
ENSG00000229267	AC072062.1	chr2	214810230	214963274	rs737453:215755678:T:C	214890954	214890954	0	1.12e-51	1.00961	0.0574474
ENSG00000229267	AC072062.1	chr2	214810230	214963274	rs717548:215676905:G:A	214812181	214812181	1	1.24e-10	-0.458969	0.0694521
ENSG00000144452	ABCA12	chr2	214931543	215138428	rs34089302:216870130:T:TG	216005407	216005407	0	2.3e-05	-0.379117	0.0884873
ENSG00000144452	ABCA12	chr2	214931543	215138428	rs1250221:216321788:C:G	215457065	215457065	1	2.91e-05	-0.403236	0.0953577
ENSG00000138363	ATIC	chr2	215311818	215349773	rs11690611:216227187:C:T	215362464	215362464	0	2.49e-19	0.874582	0.0923741
ENSG00000138363	ATIC	chr2	215311818	215349773	rs11550205:216176843:C:T	215312120	215312120	1	3.9e-06	-1.07516	0.229658
ENSG00000118242	MREG	chr2	215942806	216034096	rs4622721	215961413	215961413	0	1.36e-11	0.892095	0.128099
ENSG00000118242	MREG	chr2	215942806	216034096	rs13030243:216807227:C:T	215942504	215942504	1	1.47e-09	0.595224	0.0961337
ENSG00000115425	PECR	chr2	215996330	216082955	rs1179679:217767235:T:C	216902512	216902512	0	5.61e-05	-0.284215	0.0697915
ENSG00000079246	XRCC5	chr2	216107465	216206303	rs41297758:216979898:TTG:T	216115175	216115177	0	4.14e-18	-0.588734	0.0646648
ENSG00000079246	XRCC5	chr2	216107465	216206303	rs41302520:217055662:T:C	216190939	216190939	1	1.22e-09	-1.04037	0.167154
ENSG00000079246	XRCC5	chr2	216107465	216206303	rs3836037:216984815:C:CGACA	216120092	216120092	2	1.79e-05	-0.924365	0.21286
ENSG00000079246	XRCC5	chr2	216107465	216206303	rs2241192:217733337:G:C	216868614	216868614	3	4.17e-05	0.389486	0.0939931
ENSG00000279348	RP11-566E18.1	chr2	216211405	216213519	rs116325904:217011871:A:G	216147148	216147148	0	2.14e-31	4.35623	0.342317
ENSG00000260804	PKI55	chr2	216217046	216220192	rs72956701:217109599:G:A	216244876	216244876	0	2.88e-26	1.75136	0.153631
ENSG00000260804	PKI55	chr2	216217046	216220192	rs207903:217089776:C:T	216225053	216225053	1	3.28e-11	-0.522387	0.0765527
ENSG00000138375	SMARCAL1	chr2	216412415	216483053	rs71054476:217325778:GGT:G	216461055	216461057	0	3.2e-09	0.51846	0.0855982
ENSG00000115457	IGFBP2	chr2	216632829	216664436	rs114936798:218040275:A:T	217175552	217175552	0	1.73e-09	2.28235	0.370289
ENSG00000231672	DIRC3	chr2	217284020	217756593	rs1430127:218501953:A:G	217637230	217637230	0	4.67e-27	1.59458	0.137365
ENSG00000163466	ARPC2	chr2	218217095	218254356	rs10171839:219051314:G:A	218186591	218186591	0	3.26e-53	6.23569	0.347795
ENSG00000261338	RP11-378A13.1	chr2	218255320	218257366	rs6736362:219115108:C:T	218250385	218250385	0	9.91e-62	0.837078	0.0420924
ENSG00000127838	PNKD	chr2	218270393	218346793	rs897877:219192755:G:A	218328032	218328032	0	6.33e-09	-0.844858	0.14233
ENSG00000018280	SLC11A1	chr2	218382030	218396894	rs145351013:218346015:T:C	217481292	217481292	0	8.11e-08	-1.44526	0.26442
ENSG00000018280	SLC11A1	chr2	218382030	218396894	rs114651222:218910737:G:C	218046014	218046014	1	5.64e-05	0.788194	0.193611
ENSG00000135913	USP37	chr2	218450252	218568361	rs28449400:219291486:G:A	218426763	218426763	0	1.65e-07	7.01966	1.31729
ENSG00000144580	CNOT9	chr2	218568581	218597080	rs57264314:219478115:CAA:C	218613392	218613394	1	1.11e-05	-0.316538	0.0711195
ENSG00000115556	PLCD4	chr2	218607766	218637184	rs832800:219489856:G:A	218625133	218625133	0	1.53e-08	15.5936	2.69952
ENSG00000115568	ZNF142	chr2	218637917	218659655	rs35472563:219543091:A:G	218678368	218678368	0	3.49e-05	1.69198	0.404201
ENSG00000163481	RNF25	chr2	218663865	218672411	rs35843327:219527866:T:C	218663143	218663143	0	7.04e-06	-1.11029	0.243883
ENSG00000135912	TTLL4	chr2	218710846	218755416	rs3770211:219269729:G:T	218405006	218405006	0	8.94e-08	3.1564	0.579453
ENSG00000135929	CYP27A1	chr2	218781750	218815293	rs143248068:219748212:G:A	218883490	218883490	0	2.88e-05	-4.63868	1.09624
ENSG00000135925	WNT10A	chr2	218880364	218899581	rs3840475:219743789:TC:T	218879067	218879068	0	7.43e-08	-0.406806	0.0742014
ENSG00000235024	AC097468.7	chr2	218944630	218961903	rs359981:219828118:T:C	218963396	218963396	0	1.01e-05	-0.29731	0.0664905
ENSG00000171450	CDK5R2	chr2	218959656	218962162	exm265186	218394133	218394133	0	4.22e-07	8.45072	1.64281
ENSG00000181378	CFAP65	chr2	219002847	219041527	rs60498053:219976386:G:C	219111664	219111664	0	1.75e-09	1.31094	0.212754
ENSG00000187736	NHEJ1	chr2	219075318	219160865	rs10616178:219490981:CAA:C	218626258	218626260	0	7.97e-05	0.308477	0.0773803
ENSG00000115649	CNPPD1	chr2	219171898	219178106	rs66485936:220018415:G:GGC	219153693	219153693	0	1.81e-08	-1.41014	0.245424
ENSG00000115661	STK16	chr2	219245456	219250337	rs4674367:220072852:C:T	219208130	219208130	0	3.99e-05	0.549045	0.132167
ENSG00000127824	TUBA4A	chr2	219249712	219278170	rs1109866	219218557	219218557	0	1.15e-14	9.59319	1.19577
ENSG00000072182	ASIC4	chr2	219514171	219538772	rs56171119:220386815:C:T	219522093	219522093	0	7.71e-07	-2.02111	0.402454
ENSG00000124006	OBSL1	chr2	219550730	219571859	rs62191615:220436758:A:T	219572036	219572036	0	1.86e-06	2.60505	0.538305
ENSG00000116106	EPHA4	chr2	221418028	221574202	rs3770146	221479476	221479476	0	3.74e-42	-4.56916	0.297694
ENSG00000261428	RP11-16P6.1	chr2	222566900	222569719	rs3768973:223436402:C:T	222571683	222571683	0	4.03e-29	0.838485	0.0690364
ENSG00000261428	RP11-16P6.1	chr2	222566900	222569719	rs11883877:223415918:C:T	222551199	222551199	1	7.84e-07	-0.352162	0.07017
ENSG00000116120	FARSB	chr2	222570537	222656337	rs59567959:223526586:C:CA	222661867	222661867	0	8.26e-07	-0.37571	0.0750215
ENSG00000116120	FARSB	chr2	222570537	222656337	rs824935:222807720:A:G	221943001	221943001	1	5.78e-06	-0.466113	0.101422
ENSG00000152056	AP1S3	chr2	223751687	223838027	rs10498154:224641569:C:T	223776852	223776852	0	2.55e-10	1.06402	0.163969
ENSG00000152056	AP1S3	chr2	223751687	223838027	rs666654:224749910:G:T	223885193	223885193	1	3.75e-06	0.328506	0.0700456
ENSG00000085449	WDFY1	chr2	223855717	223945387	rs840361:224733637:G:T	223868920	223868920	0	2.45e-05	-1.20731	0.282805
ENSG00000228446	AC073052.1	chr2	224499388	224500100	rs34338001:225322252:G:A	224457535	224457535	0	8.23e-08	0.116236	0.0212768
ENSG00000273301	RP11-314B1.2	chr2	225698515	225703654	rs150105548:227022305:C:T	226157589	226157589	0	1.66e-06	3.34534	0.687916
ENSG00000169047	IRS1	chr2	226731318	226799759	rs72975419:227397670:C:A	226532954	226532954	0	5.4e-05	1.0582	0.259253
[truncated: 10,506 more rows]

## Sheet: eGenes
Gene_ID	Gene_Symbol	chr1	Gene_start	Gene_end
ENSG00000237094	RP4-669L17.10	chr1	365390	501617
ENSG00000237491	RP11-206L10.9	chr1	778771	810060
ENSG00000228794	LINC01128	chr1	825139	859446
ENSG00000225880	LINC00115	chr1	826207	827522
ENSG00000223764	RP11-54O7.3	chr1	916866	921016
ENSG00000188976	NOC2L	chr1	944205	959309
ENSG00000187642	PERM1	chr1	975205	982093
ENSG00000272512	RP11-54O7.17	chr1	995967	998051
ENSG00000188157	AGRN	chr1	1020124	1056118
ENSG00000078808	SDF4	chr1	1216909	1232031
ENSG00000176022	B3GALT6	chr1	1232266	1235041
ENSG00000127054	CPSF3L	chr1	1311586	1324691
ENSG00000107404	DVL1	chr1	1335277	1349350
ENSG00000175756	AURKAIP1	chr1	1373731	1375495
ENSG00000242485	MRPL20	chr1	1401909	1407313
ENSG00000272455	RP4-758J18.13	chr1	1409097	1410618
ENSG00000235098	ANKRD65	chr1	1418421	1421769
ENSG00000215915	ATAD3C	chr1	1449690	1470158
ENSG00000160072	ATAD3B	chr1	1471770	1497848
ENSG00000228594	FNDC10	chr1	1598013	1600096
ENSG00000189339	SLC35E2B	chr1	1659530	1692728
ENSG00000268575	RP1-283E3.8	chr1	1702737	1737688
ENSG00000215790	SLC35E2	chr1	1724839	1745992
ENSG00000187730	GABRD	chr1	2019325	2030751
ENSG00000182873	RP11-181G12.2	chr1	2181795	2184389
ENSG00000162585	FAAP20	chr1	2184462	2212720
ENSG00000269896	RP4-740C4.5	chr1	2350415	2352820
ENSG00000272420	RP4-740C4.7	chr1	2363062	2363628
ENSG00000157911	PEX10	chr1	2403965	2413797
ENSG00000157873	TNFRSF14	chr1	2555640	2565382
ENSG00000157870	FAM213B	chr1	2586492	2591469
ENSG00000215912	TTC34	chr1	2635977	2801717
ENSG00000130762	ARHGEF16	chr1	3454427	3481113
ENSG00000158109	TPRG1L	chr1	3625003	3630127
ENSG00000227372	TP73-AS1	chr1	3735602	3747336
ENSG00000130764	LRRC47	chr1	3778559	3796504
ENSG00000116198	CEP104	chr1	3812082	3857214
ENSG00000169598	DFFB	chr1	3857268	3885429
ENSG00000198912	C1orf174	chr1	3889126	3900293
ENSG00000131697	NPHP4	chr1	5862812	5992473
ENSG00000069424	KCNAB2	chr1	5991467	6101193
ENSG00000158286	RNF207	chr1	6205476	6221299
ENSG00000116237	ICMT	chr1	6221194	6235972
ENSG00000158292	GPR153	chr1	6247347	6260975
ENSG00000069812	HES2	chr1	6412419	6424670
ENSG00000187017	ESPN	chr1	6424789	6461370
ENSG00000007923	DNAJC11	chr1	6634169	6701924
ENSG00000270171	RP11-338N10.1	chr1	7693125	7694844
ENSG00000270035	RP11-338N10.2	chr1	7698304	7698872
ENSG00000269978	RP11-338N10.3	chr1	7700705	7700970
ENSG00000049245	VAMP3	chr1	7771270	7781432
ENSG00000269925	RP3-467L1.6	chr1	7776384	7776775
ENSG00000116288	PARK7	chr1	7954292	7985505
ENSG00000142599	RERE	chr1	8352398	8817643
ENSG00000049239	H6PD	chr1	9234776	9271337
ENSG00000171621	SPSB1	chr1	9292881	9369532
ENSG00000171603	CLSTN1	chr1	9729027	9824526
ENSG00000173614	NMNAT1	chr1	9943429	9985501
ENSG00000162444	RBP7	chr1	9997207	10016020
ENSG00000130939	UBE4B	chr1	10032833	10181239
ENSG00000054523	KIF1B	chr1	10210806	10381603
ENSG00000175279	APITD1	chr1	10430444	10442809
ENSG00000160049	DFFA	chr1	10456523	10472526
ENSG00000142655	PEX14	chr1	10472289	10630758
ENSG00000271895	RP4-635E18.8	chr1	11029660	11030528
ENSG00000171824	EXOSC10	chr1	11066619	11099881
ENSG00000198793	MTOR	chr1	11106536	11262507
ENSG00000204624	DISP3	chr1	11479167	11537584
ENSG00000116663	FBXO6	chr1	11664125	11674354
ENSG00000116670	MAD2L2	chr1	11674481	11691650
ENSG00000177000	MTHFR	chr1	11785724	11806920
ENSG00000242349	NPPA-AS1	chr1	11841018	11848079
ENSG00000162494	LRRC38	chr1	13474978	13514048
ENSG00000116731	PRDM2	chr1	13700199	13825079
ENSG00000142634	EFHD2	chr1	15409896	15430343
ENSG00000132906	CASP9	chr1	15490833	15526534
ENSG00000116138	DNAJC16	chr1	15526814	15592379
ENSG00000162461	SLC25A34	chr1	15736406	15741396
ENSG00000179743	FLJ37453	chr1	15834475	15848147
ENSG00000173641	HSPB7	chr1	16014029	16019594
ENSG00000186510	CLCNKA	chr1	16018876	16034050
ENSG00000184908	CLCNKB	chr1	16043737	16057308
ENSG00000142632	ARHGEF19	chr1	16197855	16212609
ENSG00000037637	FBXO42	chr1	16246840	16352454
ENSG00000157191	NECAP2	chr1	16440673	16460078
ENSG00000226029	RP4-798A10.2	chr1	16460949	16468481
ENSG00000080947	CROCCP3	chr1	16467437	16499257
ENSG00000261135	RP4-798A10.7	chr1	16514646	16515754
ENSG00000219481	NBPF1	chr1	16562320	16613562
ENSG00000215908	CROCCP2	chr1	16618970	16644683
ENSG00000186301	MST1P2	chr1	16645623	16650289
ENSG00000280114	RP5-875O13.7	chr1	16681098	16688749
ENSG00000268869	ESPNP	chr1	16687340	16720157
ENSG00000058453	CROCC	chr1	16740274	16972979
ENSG00000186715	MST1L	chr1	16754911	16770237
ENSG00000238142	RP11-108M9.4	chr1	16888539	16889649
ENSG00000117118	SDHB	chr1	17018723	17054170
ENSG00000117115	PADI2	chr1	17066762	17119435
ENSG00000142623	PADI1	chr1	17205127	17246005
ENSG00000117154	IGSF21	chr1	18107747	18378483
ENSG00000272084	RP5-1126H10.2	chr1	19072111	19075511
ENSG00000127481	UBR4	chr1	19074507	19210276
ENSG00000127463	EMC1	chr1	19215665	19251552
ENSG00000053372	MRTO4	chr1	19251540	19260128
ENSG00000211454	AKR7L	chr1	19265983	19274194
ENSG00000053371	AKR7A2	chr1	19303966	19312146
ENSG00000040487	PQLC2	chr1	19312327	19329300
ENSG00000173436	MINOS1	chr1	19596978	19629821
ENSG00000158747	NBL1	chr1	19640555	19658456
ENSG00000169914	OTUD3	chr1	19882514	19912945
ENSG00000158816	VWA5B1	chr1	20290920	20354894
ENSG00000162545	CAMK2N1	chr1	20482392	20486220
ENSG00000090432	MUL1	chr1	20499449	20508161
ENSG00000158828	PINK1	chr1	20633456	20651511
ENSG00000117242	PINK1-AS	chr1	20642658	20652193
ENSG00000117245	KIF17	chr1	20664015	20718017
ENSG00000075151	EIF4G3	chr1	20806293	21176888
ENSG00000142794	NBPF3	chr1	21440129	21485005
ENSG00000162551	ALPL	chr1	21509373	21578412
ENSG00000090686	USP48	chr1	21678299	21783606
ENSG00000142798	HSPG2	chr1	21822246	21937297
ENSG00000218510	LINC00339	chr1	22024532	22031225
ENSG00000184677	ZBTB40	chr1	22451852	22531157
ENSG00000070886	EPHA8	chr1	22563565	22603594
ENSG00000133216	EPHB2	chr1	22710840	22921500
ENSG00000169641	LUZP1	chr1	23084024	23177808
ENSG00000125945	ZNF436	chr1	23359449	23369442
ENSG00000249087	ZNF436-AS1	chr1	23368998	23371839
ENSG00000204219	TCEA3	chr1	23381062	23424740
ENSG00000088280	ASAP3	chr1	23428564	23484568
ENSG00000011009	LYPLA2	chr1	23790971	23795539
ENSG00000117305	HMGCL	chr1	23801886	23838620
ENSG00000179163	FUCA1	chr1	23845078	23868294
ENSG00000189266	PNRC2	chr1	23959110	23963462
ENSG00000225315	RP11-293P20.2	chr1	24040836	24086799
ENSG00000142677	IL22RA1	chr1	24119772	24143121
ENSG00000185436	IFNLR1	chr1	24154158	24187959
ENSG00000001460	STPG1	chr1	24357000	24416934
ENSG00000001461	NIPAL3	chr1	24415795	24472976
ENSG00000117602	RCAN3	chr1	24502352	24541040
ENSG00000184454	NCMAP	chr1	24556112	24609328
ENSG00000133226	SRRM1	chr1	24631717	24673267
ENSG00000169504	CLIC4	chr1	24745358	24844324
ENSG00000183726	TMEM50A	chr1	25337918	25362361
ENSG00000188672	RHCE	chr1	25362250	25430192
ENSG00000204178	TMEM57	chr1	25430859	25500209
ENSG00000228172	RP1-317E23.3	chr1	25816750	25820797
ENSG00000117640	MTFR1L	chr1	25818641	25832942
ENSG00000158006	PAFAH2	chr1	25959768	25998157
ENSG00000158008	EXTL1	chr1	26019885	26036464
ENSG00000236782	RP11-96L14.7	chr1	26169517	26171821
ENSG00000142684	ZNF593	chr1	26169872	26170873
ENSG00000142675	CNKSR1	chr1	26177404	26189886
ENSG00000236155	RP11-231P20.2	chr1	26209742	26229840
ENSG00000130695	CEP85	chr1	26234154	26279038
ENSG00000158062	UBXN11	chr1	26281329	26318363
ENSG00000117682	DHDDS	chr1	26432283	26471294
ENSG00000198830	HMGN2	chr1	26472451	26475972
ENSG00000260063	RP5-968P14.2	chr1	26692133	26694131
ENSG00000060642	PIGV	chr1	26787473	26798398
ENSG00000090273	NUDC	chr1	26900239	26946862
ENSG00000142784	WDTC1	chr1	27234517	27308633
ENSG00000186501	TMEM222	chr1	27322146	27336400
ENSG00000117748	RPA2	chr1	27891525	27914746
ENSG00000158161	EYA3	chr1	27970345	28088696
ENSG00000169403	PTAFR	chr1	28147167	28193936
ENSG00000126698	DNAJC8	chr1	28199457	28233025
ENSG00000130770	ATPIF1	chr1	28236110	28246906
ENSG00000270605	RP5-1092A3.4	chr1	28239510	28241453
ENSG00000130766	SESN2	chr1	28259528	28282491
ENSG00000130772	MED18	chr1	28329003	28335967
ENSG00000204138	PHACTR4	chr1	28369583	28500369
ENSG00000180098	TRNAU1AP	chr1	28553086	28578545
ENSG00000116329	OPRD1	chr1	28812143	28871267
ENSG00000229447	RP11-490K7.4	chr1	31263246	31263681
ENSG00000084636	COL16A1	chr1	31652248	31704319
ENSG00000084623	EIF3I	chr1	32221929	32231604
ENSG00000220785	MTMR9LP	chr1	32231659	32241620
ENSG00000116478	HDAC1	chr1	32292087	32333635
ENSG00000225828	FAM229A	chr1	32361271	32364278
ENSG00000160058	BSDC1	chr1	32365104	32394731
ENSG00000162520	SYNC	chr1	32680361	32703596
ENSG00000116497	S100PBP	chr1	32816768	32858879
ENSG00000160097	FNDC5	chr1	32862269	32872482
ENSG00000121905	HPCA	chr1	32885995	32898441
ENSG00000116514	RNF19B	chr1	32936446	32964685
ENSG00000004455	AK2	chr1	33007941	33080996
ENSG00000116525	TRIM62	chr1	33145403	33182059
ENSG00000134686	PHC2	chr1	33323624	33431052
ENSG00000121903	ZSCAN20	chr1	33472646	33496507
ENSG00000121904	CSMD2	chr1	33514000	34165842
ENSG00000187513	GJA4	chr1	34792999	34795747
ENSG00000241014	RP11-244H3.1	chr1	34974357	34985313
ENSG00000142687	KIAA0319L	chr1	35433491	35557950
ENSG00000020129	NCDN	chr1	35557474	35567274
ENSG00000116819	TFAP2E	chr1	35573371	35595328
ENSG00000142686	C1orf216	chr1	35713876	35719472
ENSG00000092847	AGO1	chr1	35869809	35930528
ENSG00000171812	COL8A2	chr1	36095237	36125220
ENSG00000054116	TRAPPC3	chr1	36136571	36156053
ENSG00000116871	MAP7D1	chr1	36155580	36180849
ENSG00000116883	RP11-268J15.5	chr1	36323735	36329221
ENSG00000181817	LSM10	chr1	36391239	36397892
ENSG00000116885	OSCP1	chr1	36415828	36450451
ENSG00000233621	LINC01137	chr1	37454880	37474411
ENSG00000163875	MEAF6	chr1	37492576	37514774
ENSG00000163879	DNALI1	chr1	37556920	37566857
ENSG00000134697	GNL2	chr1	37566817	37595935
ENSG00000116922	C1orf109	chr1	37681571	37692249
ENSG00000134690	CDCA8	chr1	37692419	37709719
ENSG00000183317	EPHA10	chr1	37713881	37765133
ENSG00000185090	MANEAL	chr1	37793803	37801137
ENSG00000204084	INPP5B	chr1	37860698	37947057
ENSG00000183386	FHL3	chr1	37996771	38005606
ENSG00000116954	RRAGC	chr1	38838199	38859823
ENSG00000168653	NDUFS5	chr1	39026319	39034636
ENSG00000182109	RP11-69E11.4	chr1	39522281	39546187
ENSG00000243970	PPIEL	chr1	39531839	39558707
ENSG00000090621	PABPC4	chr1	39560817	39576790
ENSG00000116983	HPCAL4	chr1	39678649	39691689
ENSG00000084072	PPIE	chr1	39692183	39763914
ENSG00000043514	TRIT1	chr1	39841023	39883511
ENSG00000131236	CAP1	chr1	40040234	40072649
ENSG00000131238	PPT1	chr1	40072706	40097703
ENSG00000049089	COL9A2	chr1	40300488	40317816
ENSG00000084070	SMAP2	chr1	40344851	40423326
ENSG00000187815	ZFP69	chr1	40477216	40496343
ENSG00000238287	RP11-656D10.3	chr1	40493158	40508661
ENSG00000164002	EXO5	chr1	40508742	40516556
ENSG00000272145	NFYC-AS1	chr1	40690381	40692066
ENSG00000066136	NFYC	chr1	40691649	40771603
ENSG00000117013	KCNQ4	chr1	40784013	40840452
ENSG00000171793	CTPS1	chr1	40979336	41012565
ENSG00000198815	FOXJ3	chr1	42176540	42335877
ENSG00000066185	ZMYND12	chr1	42430330	42456267
ENSG00000186409	CCDC30	chr1	42463331	42654664
ENSG00000065978	YBX1	chr1	42682428	42702349
ENSG00000164008	C1orf50	chr1	42767270	42775747
ENSG00000177868	SVBP	chr1	42807053	42817252
ENSG00000164010	ERMAP	chr1	42817125	42844989
ENSG00000164011	ZNF691	chr1	42846574	42852477
ENSG00000227533	SLC2A1-AS1	chr1	42959050	42983358
ENSG00000066056	TIE1	chr1	43300994	43323108
ENSG00000066322	ELOVL1	chr1	43363398	43368074
ENSG00000159479	MED8	chr1	43383918	43389808
ENSG00000198198	SZT2	chr1	43389883	43452650
ENSG00000178922	HYI	chr1	43451004	43453989
ENSG00000142949	PTPRF	chr1	43525188	43623666
ENSG00000066135	KDM4A	chr1	43650159	43705515
ENSG00000236200	KDM4A-AS1	chr1	43699766	43708138
ENSG00000126091	ST3GAL3	chr1	43705825	43931165
ENSG00000229444	RP11-184I16.4	chr1	43709393	43727343
ENSG00000117407	ARTN	chr1	43933321	43937241
ENSG00000237950	RP11-7O11.3	chr1	43944371	43946551
ENSG00000117408	IPO13	chr1	43946940	43968022
ENSG00000117410	ATP6V0B	chr1	43974488	43978295
ENSG00000117419	ERI3	chr1	44221071	44355260
ENSG00000187147	RNF220	chr1	44405195	44651724
ENSG00000198520	C1orf228	chr1	44674693	44725591
ENSG00000142937	RPS8	chr1	44775252	44778779
ENSG00000117425	PTCH2	chr1	44819845	44843063
ENSG00000070785	EIF2B3	chr1	44850523	44986722
ENSG00000126088	UROD	chr1	45012148	45015575
ENSG00000162415	ZSWIM5	chr1	45016400	45306209
ENSG00000070759	TESK2	chr1	45343884	45491166
ENSG00000280670	CCDC163P	chr1	45493867	45500079
ENSG00000132763	MMACHC	chr1	45500054	45513382
ENSG00000117450	PRDX1	chr1	45511037	45523047
ENSG00000117448	AKR1A1	chr1	45550544	45570049
ENSG00000159592	GPBP1L1	chr1	45627305	45688113
ENSG00000234329	RP11-767N6.2	chr1	45651040	45651826
ENSG00000197429	IPP	chr1	45694325	45750650
ENSG00000230896	RP11-767N6.7	chr1	45694685	45697075
ENSG00000117461	PIK3R3	chr1	46040141	46133036
ENSG00000085998	POMGNT1	chr1	46188683	46220305
ENSG00000171357	LURAP1	chr1	46203335	46221261
ENSG00000173660	UQCRH	chr1	46303632	46316776
ENSG00000117481	NSUN4	chr1	46340178	46365152
ENSG00000117480	FAAH	chr1	46394266	46413848
ENSG00000232022	FAAHP1	chr1	46432130	46482493
ENSG00000079277	MKNK1	chr1	46557409	46616843
ENSG00000142961	MOB3C	chr1	46607716	46616891
ENSG00000162367	TAL1	chr1	47216291	47232220
ENSG00000123473	STIL	chr1	47250140	47314147
ENSG00000162368	CMPK1	chr1	47333798	47378839
ENSG00000272491	RP5-1024N4.4	chr1	48227889	48229561
ENSG00000132122	SPATA6	chr1	48295373	48472208
ENSG00000123080	CDKN2C	chr1	50960746	50974633
ENSG00000085832	EPS15	chr1	51354264	51519328
ENSG00000078618	NRDC	chr1	51789192	51878937
ENSG00000169213	RAB3B	chr1	51907957	51990764
ENSG00000117862	TXNDC12	chr1	52020132	52056171
ENSG00000085840	ORC1	chr1	52372830	52404459
ENSG00000134744	ZCCHC11	chr1	52408283	52553487
ENSG00000116157	GPX7	chr1	52602373	52609051
ENSG00000162377	COA7	chr1	52684452	52698366
ENSG00000162378	ZYG11B	chr1	52726468	52827342
ENSG00000121310	ECHDC2	chr1	52895911	52927212
ENSG00000116171	SCP2	chr1	52927230	53051703
ENSG00000162383	SLC1A7	chr1	53087180	53142632
ENSG00000157184	CPT2	chr1	53196430	53214197
ENSG00000236723	RP5-1024G6.2	chr1	53209784	53213775
ENSG00000162384	C1orf123	chr1	53214100	53220617
ENSG00000081870	HSPB11	chr1	53916575	53945929
ENSG00000116212	LRRC42	chr1	53946078	53968168
ENSG00000116209	TMEM59	chr1	54026682	54053504
ENSG00000280378	RP4-758J24.6	chr1	54033127	54034880
ENSG00000215883	CYB5RL	chr1	54169652	54200036
ENSG00000116221	MRPL37	chr1	54184042	54225464
ENSG00000184313	MROH7	chr1	54641755	54710266
ENSG00000271723	MROH7-TTC4	chr1	54641787	54742308
ENSG00000162402	USP24	chr1	55066360	55215113
ENSG00000162409	PRKAA2	chr1	56645323	56715335
ENSG00000173406	DAB1	chr1	56994779	58546734
ENSG00000162600	OMA1	chr1	58415385	58546802
ENSG00000162601	MYSM1	chr1	58654740	58700092
ENSG00000232453	RP4-794H19.1	chr1	58882869	58903747
ENSG00000226476	RP11-776H12.1	chr1	60515717	60640491
ENSG00000231252	RP11-436K8.1	chr1	60659632	60867998
ENSG00000162599	NFIA	chr1	60865260	61462793
ENSG00000162604	TM2D1	chr1	61681047	61725423
ENSG00000132849	PATJ	chr1	61742478	62178675
ENSG00000132854	KANK4	chr1	62236980	62319414
ENSG00000116641	DOCK7	chr1	62454299	62688368
ENSG00000125703	ATG4C	chr1	62784136	62865513
ENSG00000142856	ITGB3BP	chr1	63440771	63593721
ENSG00000203965	EFCAB7	chr1	63523373	63572693
ENSG00000116652	DLEU2L	chr1	63547083	63550636
ENSG00000079739	PGM1	chr1	63593277	63660245
ENSG00000162437	RAVER2	chr1	64745096	64833232
ENSG00000162434	JAK1	chr1	64833230	64966504
ENSG00000162433	AK4	chr1	65147550	65232145
ENSG00000116675	DNAJC6	chr1	65248220	65415869
ENSG00000213625	LEPROT	chr1	65420588	65436007
ENSG00000116678	LEPR	chr1	65420653	65641559
ENSG00000184588	PDE4B	chr1	65792515	66374579
ENSG00000118473	SGIP1	chr1	66533384	66748299
ENSG00000152760	TCTEX1D1	chr1	66752460	66778787
ENSG00000152763	WDR78	chr1	66812886	66924887
ENSG00000203963	C1orf141	chr1	67092166	67231853
ENSG00000275678	RP4-547N15.3	chr1	67121606	67123956
ENSG00000116717	GADD45A	chr1	67685062	67688338
ENSG00000172380	GNG12	chr1	67701467	67833467
ENSG00000162595	DIRAS3	chr1	68045963	68051631
ENSG00000116729	WLS	chr1	68098474	68233120
ENSG00000033122	LRRC7	chr1	69568399	70151945
ENSG00000197568	HHLA3	chr1	70354806	70385339
ENSG00000116761	CTH	chr1	70411219	70439851
ENSG00000271992	RP11-42O15.3	chr1	70445072	70445536
ENSG00000050628	PTGER3	chr1	70852354	71047808
ENSG00000229956	ZRANB2-AS2	chr1	71081325	71489976
ENSG00000162620	LRRIQ3	chr1	74026016	74198187
ENSG00000254685	FPGT	chr1	74198213	74234086
ENSG00000259030	FPGT-TNNI3K	chr1	74198236	74543982
ENSG00000116783	TNNI3K	chr1	74235402	74544428
ENSG00000116791	CRYZ	chr1	74705483	74733408
ENSG00000162623	TYW3	chr1	74733153	74766678
ENSG00000137968	SLC44A5	chr1	75202132	75611116
ENSG00000117054	ACADM	chr1	75724348	75787575
ENSG00000137955	RABGGTB	chr1	75786198	75795079
ENSG00000057468	MSH4	chr1	75796883	75913238
ENSG00000154027	AK5	chr1	77282052	77559969
ENSG00000036549	ZZZ3	chr1	77562417	77683419
ENSG00000162616	DNAJB4	chr1	77979176	78017964
ENSG00000122420	PTGFR	chr1	78303885	78539749
ENSG00000233290	RP11-147G16.1	chr1	82215221	82261133
ENSG00000137941	TTLL7	chr1	83865029	83999150
ENSG00000271576	RP11-486G15.2	chr1	84076332	84077931
ENSG00000142875	PRKACB	chr1	84078063	84238498
ENSG00000117133	RPF1	chr1	84479260	84497790
ENSG00000117151	CTBS	chr1	84549607	84574480
ENSG00000180869	LINC01555	chr1	84628231	84635020
ENSG00000117155	SSX2IP	chr1	84643708	84690803
ENSG00000162643	WDR63	chr1	84999148	85133138
ENSG00000055732	MCOLN3	chr1	85018083	85048499
ENSG00000280099	RP11-33E12.2	chr1	85152488	85154203
ENSG00000162642	C1orf52	chr1	85249954	85259672
ENSG00000153904	DDAH1	chr1	85318482	85578363
ENSG00000117174	ZNHIT6	chr1	85649424	85708433
ENSG00000171502	COL24A1	chr1	85729234	86156943
ENSG00000122417	ODF2L	chr1	86346825	86396342
ENSG00000261737	RP4-612B15.3	chr1	86703503	86704462
ENSG00000183291	SELENOF	chr1	86862446	86914424
ENSG00000153936	HS2ST1	chr1	86914649	87109998
ENSG00000267272	LINC01140	chr1	87129766	87169198
ENSG00000065243	PKN2	chr1	88684223	88836255
ENSG00000137944	KYAT3	chr1	88935774	88992953
ENSG00000117226	GBP3	chr1	89006667	89022894
ENSG00000162654	GBP4	chr1	89181149	89198932
ENSG00000197147	LRRC8B	chr1	89524837	89597864
ENSG00000231999	FLJ27354	chr1	89583242	89632894
ENSG00000171492	LRRC8D	chr1	89821015	89936611
ENSG00000228175	GEMIN8P4	chr1	89993594	89994321
ENSG00000143032	BARHL2	chr1	90711540	90717237
ENSG00000162669	HFM1	chr1	91260767	91404869
ENSG00000069702	TGFBR3	chr1	91680344	91906335
ENSG00000189195	BTBD8	chr1	92080306	92184725
ENSG00000273487	RP4-621B10.8	chr1	92189238	92190707
ENSG00000122484	RPAP2	chr1	92298966	92402056
ENSG00000117500	TMED5	chr1	93149743	93180728
ENSG00000122483	CCDC18	chr1	93179920	93278730
ENSG00000223745	CCDC18-AS1	chr1	93262187	93346025
ENSG00000117505	DR1	chr1	93345889	93369498
ENSG00000137942	FNBP1L	chr1	93448132	93554661
ENSG00000023909	GCLM	chr1	93885206	93909456
ENSG00000198691	ABCA4	chr1	93992836	94121132
ENSG00000233482	RP11-78O9.1	chr1	94145112	94145619
ENSG00000137962	ARHGAP29	chr1	94148989	94275068
ENSG00000117528	ABCD3	chr1	94418456	94518666
ENSG00000224081	LINC01057	chr1	94613815	94855426
ENSG00000143036	SLC44A3	chr1	94820343	94895246
ENSG00000235501	RP4-639F20.1	chr1	94927567	94963270
ENSG00000152078	TMEM56	chr1	95117339	95197607
ENSG00000271092	TMEM56-RWDD3	chr1	95117924	95247225
ENSG00000122481	RWDD3	chr1	95234156	95247225
ENSG00000117569	PTBP2	chr1	96721666	96823738
ENSG00000117598	PLPPR5	chr1	98890246	99005032
ENSG00000117600	PLPPR4	chr1	99263954	99309590
ENSG00000099260	PALMD	chr1	99645944	99694541
ENSG00000156869	FRRS1	chr1	99708704	99766631
ENSG00000162688	AGL	chr1	99850085	99924023
ENSG00000283495	AC096949.1	chr1	99861473	99921651
ENSG00000156875	MFSD14A	chr1	100038098	100083377
ENSG00000156876	SASS6	chr1	100083564	100132955
ENSG00000122477	LRRC39	chr1	100148450	100178273
ENSG00000137992	DBT	chr1	100186920	100249834
ENSG00000137996	RTCA	chr1	100266208	100292769
ENSG00000079335	CDC14A	chr1	100345026	100520277
ENSG00000162692	VCAM1	chr1	100719743	100739045
ENSG00000162694	EXTL2	chr1	100872373	100895998
ENSG00000162695	SLC30A7	chr1	100896077	100981753
ENSG00000233184	RP11-421L21.3	chr1	101025879	101087268
ENSG00000060718	COL11A1	chr1	102876468	103108496
ENSG00000185946	RNPC3	chr1	103525692	103555239
ENSG00000240038	AMY2B	chr1	103553816	103579534
ENSG00000243480	AMY2A	chr1	103616812	103625780
ENSG00000215869	RP11-364B6.2	chr1	104072984	104226678
ENSG00000198890	PRMT6	chr1	107056680	107059294
ENSG00000134215	VAV3	chr1	107571161	107965144
ENSG00000085491	SLC25A24	chr1	108134037	108200849
ENSG00000260879	RP11-483I13.5	chr1	108199927	108201491
ENSG00000162636	FAM102B	chr1	108560090	108644900
ENSG00000116266	STXBP3	chr1	108746675	108809526
ENSG00000121957	GPSM2	chr1	108875351	108934545
ENSG00000121940	CLCC1	chr1	108929509	108963457
ENSG00000197780	TAF13	chr1	109062487	109076002
ENSG00000273382	RP5-1065J22.8	chr1	109087972	109090858
ENSG00000116299	KIAA1324	chr1	109113680	109206781
ENSG00000134222	PSRC1	chr1	109279557	109283186
ENSG00000221986	MYBPHL	chr1	109292366	109307041
ENSG00000134243	SORT1	chr1	109309569	109397951
ENSG00000143106	PSMA5	chr1	109399032	109426427
ENSG00000162650	ATXN7L2	chr1	109483480	109492804
ENSG00000181754	AMIGO1	chr1	109504176	109509738
ENSG00000134183	GNAT2	chr1	109603268	109619929
ENSG00000168765	GSTM4	chr1	109656082	109674836
ENSG00000213366	GSTM2	chr1	109668023	109709551
ENSG00000134184	GSTM1	chr1	109687815	109709039
ENSG00000134201	GSTM5	chr1	109712256	109775428
ENSG00000134202	GSTM3	chr1	109733933	109741038
ENSG00000168710	AHCYL1	chr1	109984687	110023741
ENSG00000116396	KCNC4	chr1	110211344	110283100
ENSG00000227963	RP5-1074L1.1	chr1	110286376	110339171
ENSG00000224699	LAMTOR5-AS1	chr1	110347117	110443817
ENSG00000134248	LAMTOR5	chr1	110401250	110407942
ENSG00000240194	CYMP	chr1	110480753	110491277
ENSG00000259834	RP11-284N8.3	chr1	110653561	110657040
ENSG00000177272	KCNA3	chr1	110672466	110675033
ENSG00000156171	DRAM2	chr1	111117334	111140216
ENSG00000162777	DENND2D	chr1	111187175	111204535
ENSG00000173947	PIFO	chr1	111346289	111353013
ENSG00000085465	OVGP1	chr1	111414315	111427777
ENSG00000116459	ATP5F1	chr1	111448865	111462773
ENSG00000143110	C1orf162	chr1	111473793	111478512
ENSG00000121933	TMIGD3	chr1	111483349	111563962
ENSG00000116473	RAP1A	chr1	111542219	111716691
ENSG00000227811	FAM212B-AS1	chr1	111739842	111747798
ENSG00000064703	DDX20	chr1	111755246	111768016
ENSG00000143079	CTTNBP2NL	chr1	112396182	112463456
ENSG00000134245	WNT2B	chr1	112466542	112530165
ENSG00000273483	RP4-671G15.2	chr1	112517800	112518441
ENSG00000007341	ST7L	chr1	112523519	112620825
ENSG00000116489	CAPZA1	chr1	112619174	112671619
ENSG00000155366	RHOC	chr1	112701107	112707434
ENSG00000184599	FAM19A3	chr1	112720420	112727235
ENSG00000215866	LINC01356	chr1	112820171	112850643
ENSG00000224167	RP3-522D1.1	chr1	112850029	112877871
ENSG00000155380	SLC16A1	chr1	112911848	112957013
ENSG00000226419	SLC16A1-AS1	chr1	112956416	113047055
ENSG00000081026	MAGI3	chr1	113390750	113685923
ENSG00000116793	PHTF1	chr1	113696832	113759489
ENSG00000232450	RP4-730K3.3	chr1	113698885	113699631
ENSG00000081019	RSBN1	chr1	113761833	113812476
ENSG00000134242	PTPN22	chr1	113813812	113871759
ENSG00000188761	BCL2L15	chr1	113878169	113887547
ENSG00000134262	AP4B1	chr1	113894749	113905201
ENSG00000118655	DCLRE1B	chr1	113905142	113914086
ENSG00000235527	HIPK1-AS1	chr1	113924001	113929492
ENSG00000163349	HIPK1	chr1	113929193	113977869
ENSG00000116774	OLFML3	chr1	113979392	114035572
ENSG00000134207	SYT6	chr1	114089292	114153919
ENSG00000175984	DENND2C	chr1	114582849	114670422
ENSG00000213281	NRAS	chr1	114704470	114716894
ENSG00000134198	TSPAN2	chr1	115048012	115089500
ENSG00000173218	VANGL1	chr1	115641954	115698224
ENSG00000177551	NHLH2	chr1	115836378	115843917
ENSG00000163393	SLC22A15	chr1	115976499	116070054
ENSG00000203865	ATP1A1-AS1	chr1	116392248	116418622
ENSG00000134247	PTGFRN	chr1	116910058	116990358
ENSG00000116830	TTF2	chr1	117060304	117107453
ENSG00000134253	TRIM45	chr1	117111061	117122587
ENSG00000065183	WDR3	chr1	117929721	117966542
ENSG00000155761	SPAG17	chr1	117953862	118185223
ENSG00000092607	TBX15	chr1	118883047	118989556
ENSG00000116874	WARS2	chr1	119031217	119140671
ENSG00000231365	RP11-418J17.1	chr1	119140397	119275973
ENSG00000143067	ZNF697	chr1	119619423	119647773
ENSG00000261662	RP5-1042I8.7	chr1	119909256	119910613
ENSG00000274642	CH17-472G23.1	chr1	120197086	120319680
ENSG00000223804	CH17-472G23.2	chr1	120267335	120341871
ENSG00000270392	PFN1P2	chr1	120432205	120434052
ENSG00000270231	NBPF8	chr1	120436354	120467739
ENSG00000275131	CH17-472G23.4	chr1	120489861	120701289
ENSG00000273136	NBPF26	chr1	120723924	120841481
ENSG00000226067	LINC00623	chr1	120913276	121009291
ENSG00000171943	SRGAP2C	chr1	121184811	121392822
ENSG00000227082	CH17-437K3.1	chr1	121396755	121463129
ENSG00000266338	NBPF15	chr1	144421387	144461674
ENSG00000196369	SRGAP2B	chr1	144887266	145095528
ENSG00000272419	RP11-403I13.8	chr1	145164100	145216058
ENSG00000162825	NBPF20	chr1	145289901	145405778
ENSG00000265491	RNF115	chr1	145738869	145824077
ENSG00000198483	ANKRD35	chr1	145866561	145885866
ENSG00000265241	RBM8A	chr1	145917715	145927678
ENSG00000271601	LIX1L	chr1	145933424	145958001
ENSG00000233396	RP11-458D21.1	chr1	146052567	146061948
ENSG00000271425	NBPF10	chr1	146064700	146144942
ENSG00000213240	RP11-458D21.5	chr1	146113653	146229000
ENSG00000264343	NOTCH2NL	chr1	146146204	146229026
ENSG00000276509	CH17-353B19.1	chr1	146235807	146237807
ENSG00000268043	NBPF12	chr1	146938745	146996202
ENSG00000131791	PRKAB2	chr1	147155107	147172550
ENSG00000237188	RP11-337C18.8	chr1	147172772	147211568
ENSG00000180867	PDIA3P1	chr1	147178114	147179622
ENSG00000131778	CHD1L	chr1	147242642	147295766
ENSG00000116128	BCL9	chr1	147541413	147626216
ENSG00000162836	ACP6	chr1	147629653	147670496
ENSG00000263956	NBPF11	chr1	148102047	148152322
ENSG00000275140	CH17-478G19.2	chr1	148772641	148784594
ENSG00000178104	PDE4DIP	chr1	148808182	149048286
ENSG00000269713	NBPF9	chr1	149054028	149103561
ENSG00000274265	CH17-189H20.1	chr1	149176023	149251013
ENSG00000215861	WI2-1896O14.1	chr1	149197993	149321732
ENSG00000274423	RP11-544O24.2	chr1	149345662	149357612
ENSG00000271383	NBPF19	chr1	149390624	149556361
ENSG00000150337	FCGR1A	chr1	149782672	149792518
ENSG00000203812	HIST2H2AA3	chr1	149842189	149842736
ENSG00000261716	RP11-196G18.22	chr1	149844499	149849024
ENSG00000272196	HIST2H2AA4	chr1	149851062	149851624
ENSG00000264207	RP11-196G18.23	chr1	149861272	149862504
ENSG00000118298	CA14	chr1	150257160	150265078
ENSG00000118292	C1orf54	chr1	150268201	150280916
ENSG00000159208	CIART	chr1	150282544	150287093
ENSG00000266472	MRPS21	chr1	150293721	150308979
ENSG00000163125	RPRD2	chr1	150363092	150476566
ENSG00000143374	TARS2	chr1	150487365	150507609
ENSG00000143369	ECM1	chr1	150508063	150513789
ENSG00000143382	ADAMTSL4	chr1	150549370	150560937
ENSG00000143384	MCL1	chr1	150574552	150579738
ENSG00000143420	ENSA	chr1	150600852	150629612
ENSG00000143457	GOLPH3L	chr1	150646226	150697144
ENSG00000163131	CTSS	chr1	150730197	150765957
ENSG00000143387	CTSK	chr1	150796209	150808323
ENSG00000143437	ARNT	chr1	150809706	150876768
ENSG00000213190	MLLT11	chr1	151057759	151068497
ENSG00000143458	GABPB2	chr1	151070579	151125542
ENSG00000261168	RP11-68I18.10	chr1	151130076	151131610
ENSG00000143434	SEMA6C	chr1	151131686	151146664
ENSG00000163156	SCNM1	chr1	151156665	151170297
ENSG00000143398	PIP5K1A	chr1	151197950	151249536
ENSG00000159352	PSMD4	chr1	151254704	151267479
ENSG00000143416	SELENBP1	chr1	151364303	151372733
ENSG00000143442	POGZ	chr1	151402725	151459465
ENSG00000143376	SNX27	chr1	151612066	151699091
ENSG00000178796	RIIAD1	chr1	151710434	151729805
ENSG00000143450	OAZ3	chr1	151762900	151771334
ENSG00000182134	TDRKH	chr1	151770108	151791416
ENSG00000203288	RP11-98D18.9	chr1	151790805	151794402
ENSG00000213171	LINGO4	chr1	151800265	151806154
ENSG00000159445	THEM4	chr1	151873585	151909808
ENSG00000197747	S100A10	chr1	151982916	151994390
ENSG00000237975	FLG-AS1	chr1	152168126	152445456
ENSG00000143546	S100A8	chr1	153390033	153391188
ENSG00000188643	S100A16	chr1	153606887	153613145
ENSG00000189171	S100A13	chr1	153618788	153631360
ENSG00000271853	RP1-178F15.5	chr1	153626333	153634340
ENSG00000272030	RP1-178F15.4	chr1	153631439	153634397
ENSG00000198837	DENND4B	chr1	153929502	153946696
ENSG00000143578	CREB3L4	chr1	153967535	153974363
ENSG00000143552	NUP210L	chr1	153992686	154155116
ENSG00000143569	UBAP2L	chr1	154220180	154271510
ENSG00000143575	HAX1	chr1	154272512	154275875
ENSG00000160716	CHRNB2	chr1	154567782	154580026
ENSG00000163354	DCST2	chr1	155018521	155033781
ENSG00000163357	DCST1	chr1	155033825	155050930
ENSG00000143537	ADAM15	chr1	155050567	155062775
ENSG00000169241	SLC50A1	chr1	155135345	155138857
ENSG00000163463	KRTCAP2	chr1	155169409	155173475
ENSG00000185499	MUC1	chr1	155185825	155192916
ENSG00000169231	THBS3	chr1	155195589	155209051
ENSG00000173171	MTX1	chr1	155208700	155213824
ENSG00000176444	CLK2	chr1	155262869	155278491
ENSG00000160752	FDPS	chr1	155308749	155320666
ENSG00000225855	RUSC1-AS1	chr1	155316864	155324176
ENSG00000116539	ASH1L	chr1	155335269	155562807
ENSG00000125459	MSTO1	chr1	155610206	155614967
ENSG00000163374	YY1AP1	chr1	155659444	155689000
ENSG00000132676	DAP3	chr1	155687961	155739010
ENSG00000203761	MSTO2P	chr1	155745830	155750137
ENSG00000116580	GON4L	chr1	155749663	155859400
ENSG00000143622	RIT1	chr1	155897809	155911404
ENSG00000196189	SEMA4A	chr1	156147367	156177752
ENSG00000160785	SLC25A44	chr1	156193933	156212796
ENSG00000242252	BGLAP	chr1	156241963	156243321
ENSG00000160781	PAQR6	chr1	156243322	156248117
ENSG00000198952	SMG5	chr1	156249225	156282825
ENSG00000198715	GLMP	chr1	156290090	156295689
ENSG00000163468	CCT3	chr1	156308969	156367873
ENSG00000163382	NAXE	chr1	156591763	156594299
ENSG00000280316	AL365181.1	chr1	156597174	156599410
ENSG00000143320	CRABP2	chr1	156699607	156705816
ENSG00000143303	RRNAD1	chr1	156728443	156736960
ENSG00000027869	SH2D2A	chr1	156806244	156816862
ENSG00000198400	NTRK1	chr1	156815641	156881850
ENSG00000187800	PEAR1	chr1	156893699	156916434
ENSG00000132694	ARHGEF11	chr1	156934841	157045370
ENSG00000183853	KIRREL	chr1	157993274	158100262
ENSG00000163563	MNDA	chr1	158831318	158849506
ENSG00000213088	ACKR1	chr1	159203308	159206500
ENSG00000188004	C1orf204	chr1	159834475	159855347
ENSG00000272668	RP11-190A12.8	chr1	159866955	159867685
ENSG00000085552	IGSF9	chr1	159927040	159945604
ENSG00000162728	KCNJ9	chr1	160081571	160090563
ENSG00000162729	IGSF8	chr1	160091341	160098943
ENSG00000132681	ATP1A4	chr1	160151571	160186977
ENSG00000143318	CASQ1	chr1	160190557	160201886
ENSG00000122218	COPA	chr1	160289274	160343400
ENSG00000171786	NHLH1	chr1	160367068	160372848
ENSG00000162738	VANGL2	chr1	160400587	160428678
ENSG00000158769	F11R	chr1	160995212	161021348
ENSG00000215845	TSTD1	chr1	161037632	161038990
ENSG00000143256	PFDN2	chr1	161100557	161118111
ENSG00000158793	NIT1	chr1	161118087	161125445
ENSG00000143224	PPOX	chr1	161166411	161178013
ENSG00000158864	NDUFS2	chr1	161197105	161214395
ENSG00000158882	TOMM40L	chr1	161225940	161230744
ENSG00000248485	PCP4L1	chr1	161258728	161285450
ENSG00000143252	SDHC	chr1	161314258	161375340
ENSG00000198929	NOS1AP	chr1	162069775	162370475
ENSG00000239887	C1orf226	chr1	162366909	162386818
ENSG00000232995	RGS5	chr1	163244506	163321894
ENSG00000143198	MGST3	chr1	165630862	165661796
ENSG00000143149	ALDH9A1	chr1	165662217	165698863
ENSG00000224358	RP11-466F5.8	chr1	165768930	165775176
ENSG00000143179	UCK2	chr1	165827532	165911618
ENSG00000143157	POGK	chr1	166839448	166856344
ENSG00000152382	TADA1	chr1	166856511	166876327
ENSG00000143195	ILDR2	chr1	166895712	166975482
ENSG00000143194	MAEL	chr1	166975583	167022214
ENSG00000198842	DUSP27	chr1	167094046	167129165
ENSG00000143190	POU2F1	chr1	167220830	167427345
ENSG00000198821	CD247	chr1	167430641	167518610
ENSG00000143162	CREG1	chr1	167529678	167553767
ENSG00000198771	RCSD1	chr1	167630094	167706249
ENSG00000143158	MPC2	chr1	167916730	167937040
ENSG00000143155	TIPRL	chr1	168178934	168202114
ENSG00000143153	ATP1B1	chr1	169105698	169132722
ENSG00000143156	NME7	chr1	169132532	169367967
ENSG00000117477	CCDC181	chr1	169394871	169460669
ENSG00000213062	RP1-206D15.6	chr1	169486077	169486986
ENSG00000000460	C1orf112	chr1	169662008	169854080
ENSG00000171806	METTL18	chr1	169792530	169794966
ENSG00000000457	SCYL3	chr1	169849632	169894267
ENSG00000120370	GORAB	chr1	170532130	170553446
ENSG00000094963	FMO2	chr1	171185209	171211230
ENSG00000117533	VAMP4	chr1	171700161	171742247
ENSG00000010165	METTL13	chr1	171781665	171814023
ENSG00000135845	PIGC	chr1	172370190	172444086
ENSG00000117586	TNFSF4	chr1	173183735	173207313
ENSG00000117592	PRDX6	chr1	173477267	173488807
ENSG00000162753	SLC9C2	chr1	173500465	173603094
ENSG00000183831	ANKRD45	chr1	173609562	173669862
ENSG00000120334	CENPL	chr1	173799551	173824720
ENSG00000117593	DARS2	chr1	173824504	173858546
ENSG00000270084	GAS5-AS1	chr1	173863249	173863941
ENSG00000234741	GAS5	chr1	173863901	173868882
ENSG00000117601	SERPINC1	chr1	173903805	173917378
ENSG00000152061	RABGAP1L	chr1	174159411	174995308
ENSG00000120333	MRPS14	chr1	175010790	175023425
ENSG00000143207	RFWD2	chr1	175944832	176207493
ENSG00000120341	SEC16B	chr1	177923957	177984303
ENSG00000254154	RP4-798P15.3	chr1	177928789	178038007
ENSG00000242193	RP11-568K15.1	chr1	178006137	178037950
ENSG00000116191	RALGPS2	chr1	178725148	178921841
ENSG00000116199	FAM20B	chr1	179025805	179076562
ENSG00000186283	TOR3A	chr1	179081378	179098023
ENSG00000143322	ABL2	chr1	179099328	179229684
ENSG00000057252	SOAT1	chr1	179293715	179358680
ENSG00000162779	AXDND1	chr1	179365721	179554735
ENSG00000162782	TDRD5	chr1	179591614	179691272
ENSG00000143340	FAM163A	chr1	179743164	179816198
ENSG00000143337	TOR1AIP1	chr1	179882043	179925000
ENSG00000121454	LHX4	chr1	180230287	180278982
ENSG00000143324	XPR1	chr1	180632005	180890251
ENSG00000135835	KIAA1614	chr1	180913155	180951614
ENSG00000135823	STX6	chr1	180972713	181023121
ENSG00000198216	CACNA1E	chr1	181413103	181808084
ENSG00000135828	RNASEL	chr1	182573635	182589256
ENSG00000135824	RGS8	chr1	182641817	182684576
ENSG00000162704	ARPC5	chr1	183620847	183635757
ENSG00000198756	COLGALT2	chr1	183929855	184037729
ENSG00000198860	TSEN15	chr1	184051678	184074212
ENSG00000116667	C1orf21	chr1	184387059	184629020
ENSG00000116406	EDEM3	chr1	184690232	184754913
ENSG00000135842	FAM129A	chr1	184790725	184974550
ENSG00000121486	TRMT1L	chr1	185118099	185157072
ENSG00000116679	IVNS1ABP	chr1	185296389	185317329
ENSG00000116703	PDC	chr1	186443567	186461122
ENSG00000228238	GS1-304P7.2	chr1	186578280	186579299
ENSG00000116711	PLA2G4A	chr1	186828954	186988981
ENSG00000116741	RGS2	chr1	192809040	192812283
ENSG00000272579	RP11-101E13.5	chr1	193090867	193091556
ENSG00000023572	GLRX2	chr1	193096469	193106114
ENSG00000162630	B3GALT2	chr1	193179046	193186654
ENSG00000000971	CFH	chr1	196651879	196747504
ENSG00000213047	DENND1B	chr1	197504749	197775696
ENSG00000116833	NR5A2	chr1	200027603	200177424
ENSG00000118197	DDX59	chr1	200623897	200669969
ENSG00000118200	CAMSAP2	chr1	200739559	200860704
ENSG00000163362	C1orf106	chr1	200891049	200915735
ENSG00000081248	CACNA1S	chr1	201039513	201112566
ENSG00000116857	TMEM9	chr1	201134773	201171574
ENSG00000081277	PKP1	chr1	201283453	201332993
ENSG00000118194	TNNT2	chr1	201359009	201377762
ENSG00000198700	IPO9	chr1	201829142	201884294
ENSG00000198892	SHISA4	chr1	201888681	201892306
ENSG00000176393	RNPEP	chr1	201982373	202006147
ENSG00000234678	RP11-465N4.4	chr1	202000095	202010353
ENSG00000170075	GPR37L1	chr1	202122859	202133592
ENSG00000133067	LGR6	chr1	202193902	202319781
ENSG00000077152	UBE2T	chr1	202331658	202341980
ENSG00000117139	KDM5B	chr1	202724492	202809470
ENSG00000228288	PCAT6	chr1	202810955	202812156
ENSG00000184774	MGAT4EP	chr1	202820267	202827225
ENSG00000234996	RP11-480I12.9	chr1	202861755	202875241
ENSG00000117153	KLHL12	chr1	202891101	202928636
ENSG00000159348	CYB5R1	chr1	202961870	202967280
ENSG00000163444	TMEM183A	chr1	203007387	203024848
ENSG00000143847	PPFIA4	chr1	203026499	203078740
ENSG00000163485	ADORA1	chr1	203090655	203167405
ENSG00000122176	FMOD	chr1	203340629	203351489
ENSG00000188783	PRELP	chr1	203475829	203491352
ENSG00000058668	ATP2B4	chr1	203626562	203744081
ENSG00000058673	ZC3H11A	chr1	203795655	203854124
ENSG00000257315	ZBED6	chr1	203796310	203800558
ENSG00000182004	SNRPE	chr1	203861604	203870550
ENSG00000133056	PIK3C2B	chr1	204422629	204494724
ENSG00000198625	MDM4	chr1	204516380	204558120
ENSG00000184144	CNTN2	chr1	205042938	205078499
ENSG00000174529	TMEM81	chr1	205083130	205084460
ENSG00000117222	RBBP5	chr1	205086143	205122015
ENSG00000133059	DSTYK	chr1	205142506	205211566
ENSG00000133069	TMCC2	chr1	205228177	205273343
ENSG00000163545	NUAK2	chr1	205302060	205321791
ENSG00000162873	KLHDC8A	chr1	205336066	205357090
ENSG00000186007	LEMD1	chr1	205381379	205457091
ENSG00000224717	RP11-576D8.4	chr1	205455930	205469024
ENSG00000174514	MFSD4A	chr1	205568886	205602918
ENSG00000158715	SLC45A3	chr1	205657852	205680459
ENSG00000069275	NUCKS1	chr1	205712820	205750276
ENSG00000117280	RAB29	chr1	205767987	205775460
ENSG00000266094	RASSF5	chr1	206507531	206589448
ENSG00000143486	EIF2D	chr1	206571293	206612463
ENSG00000162889	MAPKAPK2	chr1	206684945	206734283
ENSG00000196352	CD55	chr1	207321509	207386804
ENSG00000117595	IRF6	chr1	209785624	209806175
ENSG00000117597	DIEXF	chr1	209828008	209857565
ENSG00000143469	SYT14	chr1	209938175	210171389
ENSG00000054392	HHAT	chr1	210328253	210676296
ENSG00000153363	LINC00467	chr1	211382804	211435333
ENSG00000198570	RD3	chr1	211476523	211492917
ENSG00000223649	RP11-359E8.3	chr1	211492256	211492917
ENSG00000170385	SLC30A1	chr1	211571569	211578742
ENSG00000117650	NEK2	chr1	211658658	211675630
ENSG00000123684	LPGAT1	chr1	211743458	211830772
ENSG00000143493	INTS7	chr1	211940400	212035542
ENSG00000066027	PPP2R5A	chr1	212285538	212361863
ENSG00000065600	TMEM206	chr1	212363932	212414901
ENSG00000117691	NENF	chr1	212432888	212446379
ENSG00000260805	RP11-61J19.5	chr1	212557834	212559731
ENSG00000162772	ATF3	chr1	212565335	212620777
ENSG00000198468	FLVCR1-AS1	chr1	212852109	212858088
ENSG00000162769	FLVCR1	chr1	212858256	212899363
ENSG00000143494	VASH2	chr1	212950521	212992037
ENSG00000174606	ANGEL2	chr1	212992183	213015826
ENSG00000230461	PROX1-AS1	chr1	213817752	213988508
ENSG00000274895	RP11-478J18.2	chr1	213983794	213986419
ENSG00000143499	SMYD2	chr1	214281103	214337131
ENSG00000152104	PTPN14	chr1	214348697	214552449
ENSG00000136636	KCTD3	chr1	215567393	215621807
ENSG00000196482	ESRRG	chr1	216503247	217137755
ENSG00000092978	GPATCH2	chr1	217426993	217631082
ENSG00000067533	RRP15	chr1	218285288	218337983
ENSG00000196660	SLC30A10	chr1	219685428	219958647
ENSG00000136628	EPRS	chr1	219968602	220046658
ENSG00000162813	BPNT1	chr1	220057483	220090462
ENSG00000218283	MORF4L1P1	chr1	220253571	220254536
ENSG00000116141	MARK1	chr1	220528184	220664461
ENSG00000162817	C1orf115	chr1	220689846	220699157
ENSG00000117791	MTARC2	chr1	220748226	220784815
ENSG00000186205	MTARC1	chr1	220786760	220819657
ENSG00000143507	DUSP10	chr1	221701425	221742176
ENSG00000143498	TAF1A	chr1	222557903	222589933
ENSG00000225265	TAF1A-AS1	chr1	222589826	222593032
ENSG00000272750	RP11-378J18.8	chr1	222658868	222661512
ENSG00000186063	AIDA	chr1	222668014	222713210
ENSG00000162819	BROX	chr1	222712554	222735196
ENSG00000228106	RP11-452F19.3	chr1	222815023	222837384
ENSG00000154309	DISP1	chr1	222872272	223005995
ENSG00000187554	TLR5	chr1	223109407	223143282
ENSG00000143502	SUSD4	chr1	223220820	223364202
ENSG00000162909	CAPN2	chr1	223701594	223776018
ENSG00000227621	PHBP11	chr1	223856580	223857387
ENSG00000188460	ACTBP11	chr1	223863727	223864851
ENSG00000185495	RP11-504P24.3	chr1	223992744	224010612
ENSG00000278467	RP11-504P24.9	chr1	223994263	223995196
ENSG00000143756	FBXO28	chr1	224114088	224162047
ENSG00000143753	DEGS1	chr1	224175757	224193441
ENSG00000143771	CNIH4	chr1	224356851	224379459
ENSG00000143786	CNIH3	chr1	224434661	224740549
ENSG00000143815	LBR	chr1	225401503	225428925
ENSG00000143742	SRP9	chr1	225777814	225790466
ENSG00000143819	EPHX1	chr1	225810093	225845563
ENSG00000196187	TMEM63A	chr1	225845537	225882369
ENSG00000243709	LEFTY1	chr1	225886283	225911382
ENSG00000143811	PYCR2	chr1	225919878	225924340
ENSG00000143751	SDE2	chr1	225982703	225999331
ENSG00000182827	ACBD3	chr1	226144680	226186730
ENSG00000203685	STUM	chr1	226548801	226609214
ENSG00000143772	ITPKB	chr1	226631691	226739323
ENSG00000163050	ADCK3	chr1	226897537	226987545
ENSG00000143776	CDC42BPA	chr1	226989866	227318474
ENSG00000181450	ZNF678	chr1	227563544	227677443
ENSG00000143740	SNAP47	chr1	227728540	227781231
ENSG00000162910	MRPL55	chr1	228106680	228109312
ENSG00000181873	IBA57	chr1	228165816	228182257
ENSG00000162913	C1orf145	chr1	228203507	228213664
ENSG00000154358	OBSCN	chr1	228208131	228378874
ENSG00000181218	HIST3H2A	chr1	228456980	228457873
ENSG00000168159	RNF187	chr1	228487062	228495766
ENSG00000116574	RHOU	chr1	228735078	228746669
ENSG00000168118	RAB4A	chr1	229271063	229305894
ENSG00000135775	COG2	chr1	230642490	230693982
ENSG00000135744	AGT	chr1	230702524	230714297
ENSG00000119280	C1orf198	chr1	230837120	230869589
ENSG00000173409	ARV1	chr1	230978982	231000595
ENSG00000182118	FAM89A	chr1	231018959	231040246
ENSG00000119283	TRIM67	chr1	231162113	231221556
ENSG00000143633	C1orf131	chr1	231223764	231241187
ENSG00000116906	GNPAT	chr1	231241208	231277973
ENSG00000010072	SPRTN	chr1	231337105	231355023
ENSG00000135766	EGLN1	chr1	231363752	231425044
ENSG00000116918	TSNAX	chr1	231528654	231566524
ENSG00000116991	SIPA1L2	chr1	232397966	232561558
ENSG00000212916	MAP10	chr1	232804893	232808407
ENSG00000135778	NTPCR	chr1	232950606	232983882
ENSG00000135749	PCNX2	chr1	232983436	233295713
ENSG00000135750	KCNK1	chr1	233614005	233672512
ENSG00000231663	RP5-827C21.4	chr1	234372808	234373593
ENSG00000168275	COA6	chr1	234373457	234384049
ENSG00000059588	TARBP1	chr1	234391314	234479103
ENSG00000231768	LINC01354	chr1	234527892	234531779
ENSG00000228044	RP4-781K5.4	chr1	234646290	234683176
ENSG00000188739	RBM34	chr1	235131184	235161457
ENSG00000116957	TBCE	chr1	235367361	235448968
ENSG00000168243	GNG4	chr1	235547688	235650754
ENSG00000077585	GPR137B	chr1	236142506	236221865
ENSG00000086619	ERO1B	chr1	236215556	236281985
ENSG00000116977	LGALS8	chr1	236518001	236552981
ENSG00000119285	HEATR1	chr1	236549006	236604504
ENSG00000077522	ACTN2	chr1	236686455	236764631
ENSG00000116984	MTR	chr1	236795282	236903981
ENSG00000133019	CHRM3	chr1	239386566	239915452
ENSG00000180875	GREM2	chr1	240489574	240612149
ENSG00000182901	RGS7	chr1	240775516	241357230
ENSG00000203668	CHML	chr1	241628854	241640254
ENSG00000214837	LINC01347	chr1	243056308	243101744
ENSG00000143702	CEP170	chr1	243124429	243255348
ENSG00000054282	SDCCAG8	chr1	243256035	243500092
ENSG00000203667	COX20	chr1	244835323	244845057
ENSG00000272195	RP11-156E8.1	chr1	244969351	244971088
ENSG00000203666	EFCAB2	chr1	244969706	245127164
ENSG00000185420	SMYD3	chr1	245749343	246507312
ENSG00000162851	TFB2M	chr1	246540561	246566324
ENSG00000162852	CNST	chr1	246566445	246668584
ENSG00000260698	RP11-439E19.9	chr1	246682109	246685075
ENSG00000143653	SCCPDH	chr1	246724048	246768137
ENSG00000260855	RP11-439E19.10	chr1	246772302	246775772
ENSG00000227953	LINC01341	chr1	246776014	246792385
ENSG00000277462	ZNF670	chr1	247036785	247078755
ENSG00000188295	ZNF669	chr1	247099963	247104372
ENSG00000196418	ZNF124	chr1	247121976	247172016
ENSG00000259865	RP11-488L18.10	chr1	247187282	247188526
ENSG00000162714	ZNF496	chr1	247297413	247331846
ENSG00000169224	GCSAML	chr1	247507059	247577690
ENSG00000203663	OR2L2	chr1	248038269	248039206
ENSG00000196071	OR2L13	chr1	248098650	248100922
ENSG00000175137	SH3BP5L	chr1	248810447	248826633
ENSG00000035115	SH3YL1	chr2	217731	266398
ENSG00000151353	TMEM18	chr2	667336	677439
ENSG00000235688	AC116614.1	chr2	949628	950274
ENSG00000172554	SNTG2	chr2	950869	1367613
ENSG00000130508	PXDN	chr2	1631888	1744852
ENSG00000032389	TSSC1	chr2	3188926	3377882
ENSG00000171853	TRAPPC12	chr2	3379676	3485094
ENSG00000182551	ADI1	chr2	3497362	3519736
ENSG00000234171	RNASEH1-AS1	chr2	3558493	3561745
ENSG00000171863	RPS7	chr2	3575206	3580919
ENSG00000232044	LINC01105	chr2	5932688	6001275
ENSG00000235092	ID2-AS1	chr2	8666637	8681863
ENSG00000151693	ASAP2	chr2	9206766	9405683
ENSG00000134330	IAH1	chr2	9473659	9496543
ENSG00000151694	ADAM17	chr2	9488487	9555792
ENSG00000115750	TAF1B	chr2	9843355	9934416
ENSG00000269973	RP11-95D17.1	chr2	9936361	9939590
ENSG00000260077	RP11-254F7.2	chr2	10039093	10040663
ENSG00000172059	KLF11	chr2	10042850	10054836
ENSG00000115761	NOL10	chr2	10570767	10689987
ENSG00000243819	RN7SL832P	chr2	10690345	10692099
ENSG00000150873	C2orf50	chr2	11133054	11146790
ENSG00000134324	LPIN1	chr2	11677596	11827409
ENSG00000071575	TRIB2	chr2	12716890	12742734
ENSG00000225649	AC064875.2	chr2	12966785	13007013
ENSG00000079785	DDX1	chr2	15591179	15631111
ENSG00000197872	FAM49A	chr2	16549460	16666331
ENSG00000163029	SMC6	chr2	17663813	17800242
ENSG00000178295	GEN1	chr2	17753859	17788941
ENSG00000240857	RDH14	chr2	18554724	18560680
ENSG00000228784	LINC00954	chr2	19868861	19885047
ENSG00000183891	TTC32	chr2	19896644	19901986
ENSG00000118965	WDR35	chr2	19910261	19990131
ENSG00000143878	RHOB	chr2	20447075	20449445
ENSG00000118960	HS1BP3	chr2	20560449	20651089
ENSG00000118961	LDAH	chr2	20684015	20823130
ENSG00000119778	ATAD2B	chr2	23748665	23927114
ENSG00000173960	UBXN2A	chr2	23927286	24004909
ENSG00000163026	WDCP	chr2	24029341	24049575
ENSG00000219626	FAM228B	chr2	24076527	24169640
ENSG00000115129	TP53I3	chr2	24077434	24085861
ENSG00000198399	ITSN2	chr2	24202865	24360714
ENSG00000084676	NCOA1	chr2	24491915	24770702
ENSG00000115137	DNAJC27	chr2	24943637	24972094
ENSG00000224165	DNAJC27-AS1	chr2	24971391	25039694
ENSG00000084710	EFR3B	chr2	25042131	25159137
ENSG00000235072	AC012074.2	chr2	25369137	25375845
ENSG00000138101	DTNB	chr2	25377199	25673647
ENSG00000143970	ASXL2	chr2	25733754	25878516
ENSG00000138029	HADHB	chr2	26243171	26290468
ENSG00000138018	EPT1	chr2	26308548	26395891
ENSG00000171303	KCNK3	chr2	26692691	26733420
ENSG00000157851	DPYSL5	chr2	26847748	26950351
ENSG00000084693	AGBL5	chr2	27042365	27070622
ENSG00000138030	KHK	chr2	27086748	27100772
ENSG00000143994	ABHD1	chr2	27123790	27130812
ENSG00000138073	PREB	chr2	27130757	27134675
ENSG00000138074	SLC5A6	chr2	27199588	27212958
ENSG00000138085	ATRAID	chr2	27212028	27217178
ENSG00000084774	CAD	chr2	27217391	27243943
ENSG00000234072	AC074117.10	chr2	27356247	27367622
ENSG00000163795	ZNF513	chr2	27377232	27380790
ENSG00000115241	PPM1G	chr2	27381195	27409687
ENSG00000138002	IFT172	chr2	27444372	27489789
ENSG00000163798	SLC4A1AP	chr2	27663472	27694976
ENSG00000171174	RBKS	chr2	27781365	27891098
ENSG00000213639	PPP1CB	chr2	28751641	28802940
ENSG00000171103	TRMT61B	chr2	28849822	28870301
ENSG00000163811	WDR43	chr2	28894644	28948222
ENSG00000189350	FAM179A	chr2	28956612	29061373
ENSG00000179270	C2orf71	chr2	29060977	29074261
ENSG00000233862	AC016907.3	chr2	30051067	30143804
ENSG00000119801	YPEL5	chr2	30146942	30160533
ENSG00000213626	LBH	chr2	30231532	30323730
ENSG00000172954	LCLAT1	chr2	30447227	30644225
ENSG00000158089	GALNT14	chr2	30910468	31155202
ENSG00000158125	XDH	chr2	31334322	31414715
ENSG00000162961	DPY30	chr2	31867810	32039812
ENSG00000021574	SPAST	chr2	32063612	32157637
ENSG00000276334	AL133243.1	chr2	32521928	32523547
ENSG00000018699	TTC27	chr2	32628033	32821051
ENSG00000049323	LTBP1	chr2	32946973	33399509
ENSG00000152689	RASGRP3	chr2	33436325	33564750
ENSG00000119812	FAM98A	chr2	33583659	33599382
ENSG00000150938	CRIM1	chr2	36355927	36551135
ENSG00000171055	FEZ2	chr2	36531806	36646087
ENSG00000279519	RP11-288C18.1	chr2	36839923	36842539
ENSG00000115808	STRN	chr2	36843641	36966472
ENSG00000008869	HEATR5B	chr2	36968384	37084342
ENSG00000152133	GPATCH11	chr2	37084452	37099244
ENSG00000218739	CEBPZOS	chr2	37196489	37216193
ENSG00000115816	CEBPZ	chr2	37201613	37231713
ENSG00000272054	RP11-423P10.2	chr2	37208876	37212677
ENSG00000115825	PRKD3	chr2	37250503	37324808
ENSG00000115828	QPCT	chr2	37344575	37373322
ENSG00000115841	RMDN2	chr2	37923188	38067142
ENSG00000138061	CYP1B1	chr2	38066974	38109902
ENSG00000119787	ATL2	chr2	38294881	38377285
ENSG00000143889	HNRNPLL	chr2	38561979	38603586
ENSG00000143891	GALM	chr2	38665911	38741237
ENSG00000115875	SRSF7	chr2	38743600	38751494
ENSG00000188010	MORN2	chr2	38875963	38929072
ENSG00000214694	ARHGEF33	chr2	38889881	38975449
ENSG00000115904	SOS1	chr2	38981397	39124345
ENSG00000011566	MAP4K3	chr2	39249267	39437312
ENSG00000231312	AC007246.3	chr2	39436638	39665343
ENSG00000152154	TMEM178A	chr2	39664983	39717963
ENSG00000183023	SLC8A1	chr2	40097271	40611053
ENSG00000162878	PKDCC	chr2	42048021	42058528
ENSG00000143924	EML4	chr2	42169351	42332548
ENSG00000115944	COX7A2L	chr2	42333547	42425088
ENSG00000162882	HAAO	chr2	42767090	42792593
ENSG00000223658	C1GALT1C1L	chr2	43675152	43676322
ENSG00000138036	DYNC2LI1	chr2	43774040	43810010
ENSG00000138095	LRPPRC	chr2	43886509	43996005
ENSG00000138078	PREPL	chr2	44316282	44361862
ENSG00000259439	RP11-89K21.1	chr2	44921078	44939199
ENSG00000236502	SIX3-AS1	chr2	44940155	44941873
ENSG00000138083	SIX3	chr2	44941899	44946077
ENSG00000170577	SIX2	chr2	45005162	45009430
ENSG00000116016	EPAS1	chr2	46293668	46386703
ENSG00000250565	ATP6V1E2	chr2	46490751	46542557
ENSG00000119729	RHOQ	chr2	46541807	46583121
ENSG00000151665	PIGF	chr2	46580938	46617119
ENSG00000119878	CRIPT	chr2	46616417	46625742
ENSG00000279254	RP11-536C12.1	chr2	46668871	46670778
ENSG00000180398	MCFD2	chr2	46901871	46941855
ENSG00000234690	AC073283.4	chr2	47192406	47345074
ENSG00000119888	EPCAM	chr2	47345159	47387601
ENSG00000095002	MSH2	chr2	47402970	47562311
ENSG00000184261	KCNK12	chr2	47516582	47570939
ENSG00000116062	MSH6	chr2	47695531	47810101
ENSG00000170802	FOXN2	chr2	48314638	48379294
ENSG00000272663	RP11-191L17.1	chr2	48440044	48440597
ENSG00000162869	PPP1R21	chr2	48440599	48515391
ENSG00000068781	STON1-GTF2A1L	chr2	48529926	48776517
ENSG00000282998	RP11-152D8.1	chr2	49202127	49451896
ENSG00000143942	CHAC2	chr2	53767793	53775196
ENSG00000119737	GPR75	chr2	53852914	53859989
ENSG00000068878	PSME4	chr2	53864068	53970840
ENSG00000170634	ACYP2	chr2	53970839	54305300
ENSG00000272156	RP11-477N3.1	chr2	54082555	54085066
ENSG00000177994	C2orf73	chr2	54330035	54383742
ENSG00000115306	SPTBN1	chr2	54456286	54671445
ENSG00000214595	EML6	chr2	54723500	54972025
ENSG00000115310	RTN4	chr2	54972188	55112621
ENSG00000162994	CLHC1	chr2	55174792	55232563
ENSG00000143947	RPS27A	chr2	55231904	55235853
ENSG00000162997	PRORSD1P	chr2	55282320	55284522
ENSG00000240401	AC012358.8	chr2	55282351	55346049
ENSG00000115355	CCDC88A	chr2	55287843	55419921
ENSG00000275052	PPP4R3B	chr2	55547293	55618880
ENSG00000272606	RP11-554J4.1	chr2	55617910	55618373
ENSG00000115380	EFEMP1	chr2	55865968	55924139
ENSG00000233251	AC007743.1	chr2	56173535	56185770
ENSG00000231043	AC007238.1	chr2	58460293	58462032
ENSG00000115421	PAPOLG	chr2	60756231	60802085
ENSG00000162924	REL	chr2	60881522	60931610
ENSG00000267520	RP11-373L24.1	chr2	60925910	60931610
ENSG00000237522	NONOP2	chr2	60936820	60938049
ENSG00000162927	PUS10	chr2	60940223	61018259
ENSG00000162928	PEX13	chr2	61017226	61051990
ENSG00000162929	KIAA1841	chr2	61065872	61138034
ENSG00000274769	RP11-493E12.3	chr2	61115788	61164825
ENSG00000212978	AC016747.3	chr2	61141593	61144969
ENSG00000237651	C2orf74	chr2	61145069	61164829
ENSG00000173209	AHSA2	chr2	61177419	61191203
ENSG00000115464	USP34	chr2	61187464	61470769
ENSG00000270820	RP11-355B11.2	chr2	61471189	61484130
ENSG00000170264	FAM161A	chr2	61824855	61854143
ENSG00000170340	B3GNT2	chr2	62196114	62224731
ENSG00000228541	AC093159.1	chr2	62463128	62464070
ENSG00000186889	TMEM17	chr2	62500222	62511894
ENSG00000143951	WDPCP	chr2	63121384	63827843
ENSG00000233716	AC074367.1	chr2	63232454	63233577
ENSG00000014641	MDH1	chr2	63588610	63607197
ENSG00000143952	VPS54	chr2	63892147	64019072
ENSG00000197329	PELI1	chr2	64092653	64144454
ENSG00000225889	AC074289.1	chr2	64143240	64252859
ENSG00000119862	LGALSL	chr2	64453970	64461381
ENSG00000115902	SLC1A4	chr2	64988478	65023865
ENSG00000011523	CEP68	chr2	65056367	65087004
ENSG00000138071	ACTR2	chr2	65227754	65271253
ENSG00000143971	ETAA1	chr2	67397320	67410545
ENSG00000243667	WDR92	chr2	68122937	68157560
ENSG00000115946	PNO1	chr2	68157845	68176238
ENSG00000221823	PPP3R1	chr2	68178858	68256237
ENSG00000273275	RP11-474G23.2	chr2	68179834	68180532
ENSG00000119865	CNRIP1	chr2	68284172	68320051
ENSG00000163219	ARHGAP25	chr2	68679602	68826833
ENSG00000169599	NFU1	chr2	69395751	69437628
ENSG00000115977	AAK1	chr2	69457998	69674349
ENSG00000196975	ANXA4	chr2	69644426	69827100
ENSG00000179818	PCBP1-AS1	chr2	69962264	70103220
ENSG00000115998	C2orf42	chr2	70149881	70248615
ENSG00000116005	PCYOX1	chr2	70257387	70281191
ENSG00000035141	FAM136A	chr2	70295976	70302090
ENSG00000075340	ADD2	chr2	70607619	70768225
ENSG00000152672	CLEC4F	chr2	70808644	70820600
ENSG00000231386	AC007395.4	chr2	70810799	70811474
ENSG00000116031	CD207	chr2	70830215	70835822
ENSG00000116035	VAX2	chr2	70900591	70933446
ENSG00000116039	ATP6V1B1	chr2	70935883	70965406
ENSG00000144031	ANKRD53	chr2	70978381	70985499
ENSG00000144043	TEX261	chr2	70985939	70994945
ENSG00000124357	NAGK	chr2	71064345	71079805
ENSG00000124383	MPHOSPH10	chr2	71130315	71150101
ENSG00000124374	PAIP2B	chr2	71182740	71227083
ENSG00000075292	ZNF638	chr2	71276562	71435069
ENSG00000135636	DYSF	chr2	71453723	71686768
ENSG00000144040	SFXN5	chr2	72942037	73075619
ENSG00000135617	PRADC1	chr2	73228007	73233238
ENSG00000135624	CCT7	chr2	73233421	73253021
ENSG00000163013	FBXO41	chr2	73254683	73284431
ENSG00000163016	ALMS1P1	chr2	73644920	73685576
ENSG00000144048	DUSP11	chr2	73762185	73780157
ENSG00000124356	STAMBP	chr2	73828917	73873659
ENSG00000187605	TET3	chr2	73986405	74108176
ENSG00000257800	FNBP1P1	chr2	74120681	74123218
ENSG00000217702	RP11-287D1.4	chr2	74130584	74135395
ENSG00000163170	BOLA3	chr2	74135399	74147994
ENSG00000114978	MOB1A	chr2	74152529	74178898
ENSG00000188687	SLC4A5	chr2	74216243	74343414
ENSG00000159239	C2orf81	chr2	74393837	74421662
ENSG00000115274	INO80B	chr2	74455024	74457960
ENSG00000115275	MOGS	chr2	74461058	74465410
ENSG00000204822	MRPL53	chr2	74471959	74473322
ENSG00000115282	TTC31	chr2	74483074	74494886
ENSG00000144045	DQX1	chr2	74518132	74526336
ENSG00000115307	AUP1	chr2	74526646	74529939
ENSG00000236209	AC104135.2	chr2	74919556	74924846
ENSG00000115350	POLE4	chr2	74958493	74970128
ENSG00000270571	RP11-355F16.1	chr2	75154367	75189949
ENSG00000115364	MRPL19	chr2	75646784	75690851
ENSG00000005436	GCFC2	chr2	75652001	75710989
ENSG00000270996	RP11-342K6.4	chr2	75719121	75720018
ENSG00000176204	LRRTM4	chr2	76747720	77593319
ENSG00000163541	SUCLG1	chr2	84423524	84460045
ENSG00000115423	DNAH6	chr2	84516456	84819589
ENSG00000152291	TGOLN2	chr2	85318021	85328425
ENSG00000042445	RETSAT	chr2	85342089	85354620
ENSG00000042493	CAPG	chr2	85394749	85418432
ENSG00000115486	GGCX	chr2	85544724	85561547
ENSG00000168883	USP39	chr2	85602857	85649282
ENSG00000168887	C2orf68	chr2	85606655	85612066
ENSG00000115525	ST3GAL5	chr2	85839145	85889014
ENSG00000068654	POLR1A	chr2	86020217	86106155
ENSG00000132305	IMMT	chr2	86143933	86195770
ENSG00000132313	MRPL35	chr2	86199356	86213794
ENSG00000068615	REEP1	chr2	86213994	86338083
ENSG00000115561	CHMP3	chr2	86503432	86563479
ENSG00000239305	RNF103	chr2	86603394	86623866
ENSG00000153561	RMND5A	chr2	86720174	86778041
ENSG00000183281	PLGLB1	chr2	87002560	87021852
ENSG00000231259	AC125232.1	chr2	87031816	87053069
ENSG00000234231	AC093616.4	chr2	87700985	87738105
ENSG00000125551	PLGLB2	chr2	87748088	87758793
ENSG00000185304	RGPD2	chr2	87755956	87825952
ENSG00000144115	THNSL2	chr2	88170296	88186636
ENSG00000153574	RPIA	chr2	88691645	88750935
ENSG00000283196	RP4-614C10.2	chr2	89542843	89585652
ENSG00000143429	AC027612.6	chr2	91617161	91659972
ENSG00000213355	CNN2P8	chr2	94737338	94738249
ENSG00000144029	MRPS5	chr2	95087208	95149434
ENSG00000144026	ZNF514	chr2	95147331	95165413
ENSG00000275111	ZNF2	chr2	95165433	95184317
ENSG00000155066	PROM2	chr2	95274454	95291308
ENSG00000115041	KCNIP3	chr2	95297305	95386083
ENSG00000272913	RP11-440D17.3	chr2	95525110	95526702
ENSG00000232931	LINC00342	chr2	95807119	95816215
ENSG00000174501	ANKRD36C	chr2	95836920	95991831
ENSG00000084090	STARD7	chr2	96184860	96208825
ENSG00000204685	STARD7-AS1	chr2	96208417	96242621
ENSG00000135956	TMEM127	chr2	96248517	96265994
ENSG00000144028	SNRNP200	chr2	96274337	96305515
ENSG00000198885	ITPRIPL1	chr2	96325332	96330517
ENSG00000121152	NCAPH	chr2	96335788	96373845
ENSG00000158158	CNNM4	chr2	96760903	96811891
ENSG00000168763	CNNM3	chr2	96816246	96833911
ENSG00000213337	ANKRD39	chr2	96836612	96858095
ENSG00000144199	FAHD2B	chr2	97083584	97094882
ENSG00000230606	AC159540.1	chr2	97416166	97433527
ENSG00000196912	ANKRD36B	chr2	97492664	97589965
ENSG00000135940	COX5B	chr2	97646041	97648383
ENSG00000115073	ACTR1B	chr2	97655964	97664107
ENSG00000075568	TMEM131	chr2	97756334	97995891
ENSG00000222000	AC092675.3	chr2	98331390	98356005
ENSG00000040933	INPP4A	chr2	98444855	98594390
ENSG00000115446	UNC50	chr2	98608580	98618515
ENSG00000071073	MGAT4A	chr2	98619107	98731126
ENSG00000135951	TSGA10	chr2	98997262	99154964
ENSG00000241962	RP11-111H13.1	chr2	99141486	99322741
ENSG00000273045	C2orf15	chr2	99141486	99151487
ENSG00000144182	LIPT1	chr2	99154956	99163157
ENSG00000158411	MITD1	chr2	99161428	99181058
ENSG00000144214	LYG1	chr2	99284239	99304742
ENSG00000158417	EIF5B	chr2	99337354	99401326
ENSG00000144218	AFF3	chr2	99545420	100142739
ENSG00000170500	LONRF2	chr2	100273292	100322733
ENSG00000204634	TBC1D8	chr2	101007618	101252866
ENSG00000272902	RP11-299H21.1	chr2	101151661	101155412
ENSG00000163162	RNF149	chr2	101271220	101308701
ENSG00000175874	CREG2	chr2	101345552	101387595
ENSG00000281162	LINC01127	chr2	101962057	101987167
ENSG00000115602	IL1RL1	chr2	102311503	102352037
ENSG00000115604	IL18R1	chr2	102311530	102398775
ENSG00000115616	SLC9A2	chr2	102619708	102711318
ENSG00000135953	MFSD9	chr2	102715841	102736888
ENSG00000170417	TMEM182	chr2	102736909	102843893
ENSG00000198914	POU3F3	chr2	104855512	104858574
ENSG00000135972	MRPS9	chr2	105037984	105099960
ENSG00000272994	RP11-332H14.2	chr2	105334028	105337475
ENSG00000135974	C2orf49	chr2	105337360	105349211
ENSG00000115641	FHL2	chr2	105357713	105438513
ENSG00000071051	NCK2	chr2	105744898	105894274
ENSG00000115652	UXS1	chr2	106093304	106194339
ENSG00000153165	RGPD3	chr2	106391291	106468376
ENSG00000144057	ST6GAL2	chr2	106801601	106887108
ENSG00000196862	RGPD4	chr2	107826938	107890841
ENSG00000198203	SULT1C2	chr2	108288640	108309915
ENSG00000135968	GCC2	chr2	108448562	108509415
ENSG00000163006	CCDC138	chr2	108786758	108885477
ENSG00000172985	SH3RF3	chr2	109129349	109504632
ENSG00000186522	SEPTIN10	chr2	109542983	109614206
ENSG00000256977	LIMS3	chr2	109898429	109934429
ENSG00000204588	LINC01123	chr2	109987064	109996140
ENSG00000175701	LINC00116	chr2	110211530	110245420
ENSG00000175772	LINC01106	chr2	110375139	110384442
ENSG00000183054	RGPD6	chr2	110513813	110577185
ENSG00000153094	BCL2L11	chr2	111119379	111168447
ENSG00000153107	ANAPC1	chr2	111766272	111884690
ENSG00000153208	MERTK	chr2	111898480	112029561
ENSG00000153214	TMEM87B	chr2	112055224	112119318
ENSG00000144152	FBLN7	chr2	112138386	112188216
ENSG00000278962	RP11-399B17.1	chr2	112188365	112190635
ENSG00000144161	ZC3H8	chr2	112211526	112255136
ENSG00000169629	RGPD8	chr2	112370093	112434488
ENSG00000114999	TTL	chr2	112482155	112541739
ENSG00000125630	POLR1B	chr2	112541916	112577150
ENSG00000231747	AC079922.2	chr2	112621810	112622167
ENSG00000237753	AC079922.3	chr2	112641833	112645690
ENSG00000144136	SLC20A1	chr2	112645858	112663827
ENSG00000189223	PAX8-AS1	chr2	113211523	113276581
ENSG00000125618	PAX8	chr2	113215998	113278950
ENSG00000136682	CBWD2	chr2	113437692	113496189
ENSG00000146556	WASH2P	chr2	113588551	113599043
ENSG00000236397	DDX11L2	chr2	113599037	113601261
ENSG00000279267	RP11-395L14.18	chr2	113605868	113607908
ENSG00000240356	RPL23AP7	chr2	113610503	113627090
ENSG00000144134	RABL2A	chr2	113627230	113643396
ENSG00000115084	SLC35F5	chr2	113705012	113756823
ENSG00000115091	ACTR3	chr2	113889961	113962596
ENSG00000175497	DPP10	chr2	114442300	115845752
ENSG00000235026	DPP10-AS1	chr2	115130936	115161343
ENSG00000088205	DDX18	chr2	117814651	117832379
ENSG00000125629	INSIG2	chr2	118088453	118110997
ENSG00000186132	C2orf76	chr2	119302226	119366828
ENSG00000171227	TMEM37	chr2	119429902	119438520
ENSG00000163075	CFAP221	chr2	119544433	119662251
ENSG00000144120	TMEM177	chr2	119679168	119686507
ENSG00000088179	PTPN4	chr2	119759632	119983818
ENSG00000115109	EPB41L5	chr2	120013006	120179119
ENSG00000226479	TMEM185B	chr2	120221279	120223408
ENSG00000260634	RP11-521O16.1	chr2	127024253	127025723
ENSG00000136717	BIN1	chr2	127048028	127107355
ENSG00000163161	ERCC3	chr2	127257291	127294176
ENSG00000169967	MAP3K2	chr2	127298731	127388465
ENSG00000236682	AC068282.3	chr2	127389131	127400580
ENSG00000144231	POLR2D	chr2	127843552	127858157
ENSG00000136731	UGGT1	chr2	128091201	128195677
ENSG00000225449	RAB6C-AS1	chr2	129966593	129980466
ENSG00000136699	SMPD4	chr2	130151393	130182750
ENSG00000213225	NOC2LP1	chr2	130229380	130232106
ENSG00000136718	IMP4	chr2	130342226	130347810
ENSG00000072135	PTPN18	chr2	130356008	130375409
ENSG00000178162	FAR2P2	chr2	130416756	130431363
ENSG00000136698	CFC1	chr2	130592169	130599575
ENSG00000240253	FAR2P3	chr2	130690134	130718831
ENSG00000136002	ARHGEF4	chr2	130836917	131047263
ENSG00000115762	PLEKHB2	chr2	131104848	131353709
ENSG00000173272	MZT2A	chr2	131464901	131492743
ENSG00000152117	AC093838.4	chr2	131492814	131521573
ENSG00000197927	C2orf27A	chr2	131722376	131767404
ENSG00000163046	ANKRD30BL	chr2	132147592	132257969
ENSG00000224043	CCNT2-AS1	chr2	134735465	134918710
ENSG00000082258	CCNT2	chr2	134918236	134959342
ENSG00000176601	MAP3K19	chr2	134964492	135047468
ENSG00000115839	RAB3GAP1	chr2	135052266	135176394
ENSG00000144224	UBXN4	chr2	135741620	135785055
ENSG00000076003	MCM6	chr2	135839627	135876426
ENSG00000231890	DARS-AS1	chr2	135985177	136022593
ENSG00000150540	HNMT	chr2	137964021	138016364
ENSG00000237772	AC092620.3	chr2	138604511	138613167
ENSG00000168702	LRP1B	chr2	140231424	142131701
ENSG00000115919	KYNU	chr2	142877499	143055832
ENSG00000169554	ZEB2	chr2	144384082	144524583
ENSG00000121989	ACVR2A	chr2	147844518	147930826
ENSG00000115947	ORC4	chr2	147930398	148021604
ENSG00000187123	LYPD6	chr2	149329986	149474148
ENSG00000184898	RBM43	chr2	151247941	151261879
ENSG00000080345	RIF1	chr2	151409884	151508013
ENSG00000183091	NEB	chr2	151485337	151734487
ENSG00000162980	ARL5A	chr2	151788985	151828492
ENSG00000283228	CTD-2021K4.1	chr2	151802652	151973949
ENSG00000182389	CACNB4	chr2	151832769	152099475
ENSG00000115145	STAM2	chr2	152116802	152175992
ENSG00000157827	FMNL2	chr2	152335238	152649834
ENSG00000144278	GALNT13	chr2	153871914	154453849
ENSG00000123612	ACVR1C	chr2	157526768	157629005
ENSG00000144283	PKP4	chr2	158456965	158682879
ENSG00000163331	DAPL1	chr2	158795318	158862958
ENSG00000251491	OR7E28P	chr2	158862312	158863285
ENSG00000196151	WDSUB1	chr2	159235794	159286799
ENSG00000224152	AC009506.1	chr2	159615297	159617082
ENSG00000226266	AC009961.3	chr2	159670709	159712435
ENSG00000241399	CD302	chr2	159768631	159798255
ENSG00000054219	LY75	chr2	159803356	159904749
ENSG00000144290	SLC4A10	chr2	161424333	161985282
ENSG00000197635	DPP4	chr2	161992242	162074542
ENSG00000182263	FIGN	chr2	163593397	163736012
ENSG00000115290	GRB14	chr2	164492813	164621848
ENSG00000169507	SLC38A11	chr2	164896187	164955525
ENSG00000178662	CSRNP3	chr2	165469648	165689407
ENSG00000115339	GALNT3	chr2	165747592	165794682
ENSG00000235192	AC009495.2	chr2	165794852	165810010
ENSG00000123607	TTC21B	chr2	165857476	165953843
ENSG00000236107	AC010127.3	chr2	165957400	166301784
ENSG00000169432	SCN9A	chr2	166195186	166375993
ENSG00000136546	SCN7A	chr2	166403574	166494247
ENSG00000235335	AC016723.4	chr2	167814775	167941144
ENSG00000172318	B3GALT1	chr2	167868949	167874041
ENSG00000198648	STK39	chr2	167954021	168248141
ENSG00000163072	NOSTRIN	chr2	168786540	168865514
ENSG00000152253	SPC25	chr2	168834133	168913371
ENSG00000152254	G6PC2	chr2	168901241	168910000
ENSG00000081479	LRP2	chr2	169127110	169362685
ENSG00000163093	BBS5	chr2	169479179	169506655
ENSG00000138399	FASTKD1	chr2	169529750	169573875
ENSG00000138398	PPIG	chr2	169584341	169641406
ENSG00000154479	CCDC173	chr2	169645426	169694433
ENSG00000144362	PHOSPHO2	chr2	169694455	169701708
ENSG00000144357	UBR3	chr2	169827459	170084131
ENSG00000071909	MYO3B	chr2	170178146	170655171
ENSG00000204334	ERICH2	chr2	170783787	170798971
ENSG00000071967	CYBRD1	chr2	171522248	171558133
ENSG00000077380	DYNC1I2	chr2	171687410	171748420
ENSG00000115840	SLC25A12	chr2	171784371	171999859
ENSG00000172878	METAP1D	chr2	171999584	172082430
ENSG00000091409	ITGA6	chr2	172427355	172506282
ENSG00000152256	PDK1	chr2	172555374	172608669
ENSG00000091428	RAPGEF4	chr2	172735275	173052893
ENSG00000091436	AC013461.1	chr2	173075436	173268010
ENSG00000144354	CDCA7	chr2	173354821	173368997
ENSG00000271151	RP11-394I13.2	chr2	173968352	173969418
ENSG00000138430	OLA1	chr2	174072448	174248698
ENSG00000138433	CIR1	chr2	174348023	174395715
ENSG00000144306	SCRN3	chr2	174395731	174429575
ENSG00000163328	GPR155	chr2	174431572	174487094
ENSG00000115935	WIPF1	chr2	174559573	174682916
ENSG00000154518	ATP5G3	chr2	175176259	175184607
ENSG00000144320	KIAA1715	chr2	175923893	176002839
ENSG00000128654	MTX2	chr2	176269396	176338025
ENSG00000280374	RP11-337N6.3	chr2	177317716	177318471
ENSG00000018510	AGPS	chr2	177392645	177559299
ENSG00000196659	TTC30B	chr2	177548999	177553014
ENSG00000128655	PDE11A	chr2	177623253	178108339
ENSG00000079156	OSBPL6	chr2	178194482	178402891
ENSG00000223960	AC009948.5	chr2	178413940	178440243
ENSG00000204311	DFNB59	chr2	178451437	178461390
ENSG00000155657	TTN	chr2	178525990	178830802
ENSG00000270574	RP11-171I2.2	chr2	178578791	178580906
ENSG00000267784	RP11-171I2.1	chr2	178723458	178727046
ENSG00000163492	CCDC141	chr2	178830270	179050086
ENSG00000187231	SESTD1	chr2	179101693	179264790
ENSG00000144331	ZNF385B	chr2	179441983	179861505
ENSG00000163510	CWC22	chr2	179944877	180007113
ENSG00000170035	UBE2E3	chr2	180967249	181076585
ENSG00000115232	ITGA4	chr2	181457203	181536187
ENSG00000188452	CERKL	chr2	181536677	181680665
ENSG00000162992	NEUROD1	chr2	181673089	181680876
ENSG00000138434	SSFA2	chr2	181891834	181930738
ENSG00000115252	PDE1A	chr2	182140037	182523192
ENSG00000163002	NUP35	chr2	183117514	183161680
ENSG00000272800	RP11-438L19.1	chr2	183214320	183215400
ENSG00000226747	AC007966.1	chr2	185719875	185740479
ENSG00000188738	FSIP2	chr2	185738629	185833290
ENSG00000231646	FSIP2-AS1	chr2	185783692	185800151
ENSG00000237877	LINC01473	chr2	186032892	186083233
ENSG00000138448	ITGAV	chr2	186590066	186680901
ENSG00000003436	TFPI	chr2	187464231	187565760
ENSG00000204262	COL5A2	chr2	189031897	189179879
ENSG00000115368	WDR75	chr2	189441434	189475565
ENSG00000138449	SLC40A1	chr2	189560580	189583758
ENSG00000138381	ASNSD1	chr2	189661386	189670831
ENSG00000128694	OSGEPL1	chr2	189746661	189763227
ENSG00000273240	RP11-455J20.3	chr2	189763860	189764456
ENSG00000128699	ORMDL1	chr2	189770324	189784371
ENSG00000064933	PMS1	chr2	189784086	189877629
ENSG00000187699	C2orf88	chr2	189879610	190203484
ENSG00000138379	MSTN	chr2	190055698	190062729
ENSG00000198130	HIBCH	chr2	190189736	190344193
ENSG00000151689	INPP1	chr2	190343471	190371665
ENSG00000151690	MFSD6	chr2	190408356	190509205
ENSG00000138386	NAB1	chr2	190646747	190692766
ENSG00000138378	STAT4	chr2	191029577	191151596
ENSG00000128641	MYO1B	chr2	191245186	191425389
ENSG00000196950	SLC39A10	chr2	195575978	195737702
ENSG00000118997	DNAH7	chr2	195737704	196068812
ENSG00000203435	E2F3P2	chr2	195994260	195995680
ENSG00000081320	STK17B	chr2	196133567	196176503
ENSG00000119041	GTF3C3	chr2	196763033	196799725
ENSG00000187944	C2orf66	chr2	196805003	196810276
ENSG00000197121	PGAP1	chr2	196833005	196927796
ENSG00000065413	ANKRD44	chr2	196967018	197311173
ENSG00000115524	SF3B1	chr2	197389785	197435091
ENSG00000119042	SATB2	chr2	199269501	199471266
ENSG00000226124	FTCDNL1	chr2	199760545	199851173
ENSG00000162971	TYW5	chr2	199929976	199955736
ENSG00000163535	SGO2	chr2	200510009	200583782
ENSG00000138356	AOX1	chr2	200585869	200677064
ENSG00000240344	PPIL3	chr2	200870908	200889303
ENSG00000196290	NIF3L1	chr2	200889328	200903930
ENSG00000115942	ORC2	chr2	200908974	200963680
ENSG00000155744	FAM126B	chr2	200973719	201071671
ENSG00000064012	CASP8	chr2	201233444	201287711
ENSG00000155749	ALS2CR12	chr2	201288272	201357398
ENSG00000115993	TRAK2	chr2	201377208	201451579
ENSG00000155754	ALS2CR11	chr2	201487426	201619178
ENSG00000082126	MPP4	chr2	201644871	201698694
ENSG00000003393	ALS2	chr2	201700555	201781189
ENSG00000273456	RP11-686O6.2	chr2	202374933	202375604
ENSG00000163596	ICA1L	chr2	202773151	202871985
ENSG00000138442	WDR12	chr2	202874783	203014798
ENSG00000138380	CARF	chr2	202912215	202987063
ENSG00000144426	NBEAL1	chr2	203014880	203226378
ENSG00000138443	ABI2	chr2	203328220	203447723
ENSG00000173166	RAPH1	chr2	203394346	203535410
ENSG00000116117	PARD3B	chr2	204545794	205620162
ENSG00000114933	INO80D	chr2	205993722	206086303
ENSG00000023228	NDUFS1	chr2	206114818	206159603
ENSG00000237580	GCSHP3	chr2	206116111	206116500
ENSG00000183671	GPR1	chr2	206175317	206218047
ENSG00000204186	ZDBF2	chr2	206274664	206314428
ENSG00000114948	ADAM23	chr2	206443540	206621130
ENSG00000138400	MDH1B	chr2	206737764	206765547
ENSG00000118246	FASTKD2	chr2	206765358	206792509
ENSG00000118263	KLF7	chr2	207074138	207167267
ENSG00000118260	CREB1	chr2	207529738	207603431
ENSG00000144401	METTL21A	chr2	207580632	207625928
ENSG00000163249	CCNYL1	chr2	207711541	207761839
ENSG00000115020	PIKFYVE	chr2	208266268	208358751
ENSG00000144407	PTH2R	chr2	208359715	208854503
ENSG00000078018	MAP2	chr2	209424059	209734118
ENSG00000144445	KANSL1L	chr2	210021424	210171383
ENSG00000229127	AC007038.7	chr2	210030734	210064356
ENSG00000115365	LANCL1	chr2	210431250	210477652
ENSG00000021826	CPS1	chr2	210477683	210679107
ENSG00000178568	ERBB4	chr2	211375718	212538841
ENSG00000270659	RP11-105N14.1	chr2	213152971	213153659
ENSG00000144451	SPAG16	chr2	213284380	214410501
ENSG00000174453	VWC2L	chr2	214411066	214578959
ENSG00000138376	BARD1	chr2	214725647	214809711
ENSG00000229267	AC072062.1	chr2	214810230	214963274
ENSG00000144452	ABCA12	chr2	214931543	215138428
ENSG00000138363	ATIC	chr2	215311818	215349773
ENSG00000118242	MREG	chr2	215942806	216034096
ENSG00000115425	PECR	chr2	215996330	216082955
ENSG00000079246	XRCC5	chr2	216107465	216206303
ENSG00000279348	RP11-566E18.1	chr2	216211405	216213519
ENSG00000260804	PKI55	chr2	216217046	216220192
ENSG00000138375	SMARCAL1	chr2	216412415	216483053
ENSG00000115457	IGFBP2	chr2	216632829	216664436
ENSG00000231672	DIRC3	chr2	217284020	217756593
ENSG00000163466	ARPC2	chr2	218217095	218254356
ENSG00000261338	RP11-378A13.1	chr2	218255320	218257366
ENSG00000127838	PNKD	chr2	218270393	218346793
ENSG00000018280	SLC11A1	chr2	218382030	218396894
ENSG00000135913	USP37	chr2	218450252	218568361
ENSG00000144580	CNOT9	chr2	218568581	218597080
ENSG00000115556	PLCD4	chr2	218607766	218637184
ENSG00000115568	ZNF142	chr2	218637917	218659655
ENSG00000163481	RNF25	chr2	218663865	218672411
ENSG00000135912	TTLL4	chr2	218710846	218755416
ENSG00000135929	CYP27A1	chr2	218781750	218815293
ENSG00000135925	WNT10A	chr2	218880364	218899581
ENSG00000235024	AC097468.7	chr2	218944630	218961903
ENSG00000171450	CDK5R2	chr2	218959656	218962162
ENSG00000181378	CFAP65	chr2	219002847	219041527
ENSG00000187736	NHEJ1	chr2	219075318	219160865
ENSG00000115649	CNPPD1	chr2	219171898	219178106
ENSG00000115661	STK16	chr2	219245456	219250337
ENSG00000127824	TUBA4A	chr2	219249712	219278170
ENSG00000072182	ASIC4	chr2	219514171	219538772
ENSG00000124006	OBSL1	chr2	219550730	219571859
ENSG00000116106	EPHA4	chr2	221418028	221574202
ENSG00000261428	RP11-16P6.1	chr2	222566900	222569719
ENSG00000116120	FARSB	chr2	222570537	222656337
ENSG00000152056	AP1S3	chr2	223751687	223838027
ENSG00000085449	WDFY1	chr2	223855717	223945387
ENSG00000228446	AC073052.1	chr2	224499388	224500100
ENSG00000273301	RP11-314B1.2	chr2	225698515	225703654
ENSG00000169047	IRS1	chr2	226731318	226799759
ENSG00000081052	COL4A4	chr2	227002712	227164113
ENSG00000169031	COL4A3	chr2	227164566	227314792
ENSG00000236432	AC097662.2	chr2	227221053	227325201
ENSG00000168958	MFF	chr2	227325152	227357836
ENSG00000042304	C2orf83	chr2	227610091	227633320
ENSG00000135917	SLC19A3	chr2	227685211	227718012
ENSG00000153820	SPHKAP	chr2	227979951	228181645
ENSG00000153823	PID1	chr2	228850527	229271285
ENSG00000187957	DNER	chr2	229357630	229714558
ENSG00000153827	TRIP12	chr2	229763839	229923239
ENSG00000153832	FBXO36	chr2	229922303	230013109
ENSG00000079263	SP140	chr2	230203111	230313215
ENSG00000185404	SP140L	chr2	230327185	230403732
ENSG00000067066	SP100	chr2	230415943	230544090
ENSG00000135932	CAB39	chr2	230712846	230821075
ENSG00000135916	ITM2C	chr2	230864640	230879248
ENSG00000204128	C2orf72	chr2	231037491	231049719
ENSG00000224376	AC017104.6	chr2	231388977	231394991
ENSG00000283312	RP11-562I5.1	chr2	231493709	231495299
ENSG00000181798	LINC00471	chr2	231508427	231514339
ENSG00000171596	NMUR1	chr2	231523161	231530495
ENSG00000156973	PDE6D	chr2	231732426	231786272
ENSG00000144524	COPS7B	chr2	231781672	231809254
ENSG00000261096	RP11-690I21.2	chr2	231809847	231812352
ENSG00000251485	AC068134.10	chr2	232343117	232343903
ENSG00000135930	EIF4E2	chr2	232550053	232583644
ENSG00000115468	EFHD1	chr2	232606058	232682781
ENSG00000182600	C2orf82	chr2	232857271	232878708
ENSG00000066248	NGEF	chr2	232878687	233013272
ENSG00000085978	ATG16L1	chr2	233210052	233295674
ENSG00000130561	SAG	chr2	233307817	233347055
ENSG00000259793	RP11-400N9.1	chr2	233351133	233353416
ENSG00000085982	USP40	chr2	233475521	233566782
ENSG00000130147	SH3BP4	chr2	234951974	235055714
ENSG00000157985	AGAP1	chr2	235494090	236131800
ENSG00000235529	AGAP1-IT1	chr2	235505752	235507566
ENSG00000132321	IQCA1	chr2	236324148	236507542
ENSG00000144476	ACKR3	chr2	236567788	236582358
ENSG00000227252	AC105760.2	chr2	237059435	237085817
ENSG00000198612	COPS8	chr2	237085313	237100466
ENSG00000124839	RAB17	chr2	237574323	237601614
ENSG00000124831	LRRFIP1	chr2	237627577	237813682
ENSG00000184182	UBE2F	chr2	237966828	238042782
ENSG00000258984	UBE2F-SCLY	chr2	237967015	238099412
ENSG00000132330	SCLY	chr2	238060890	238099413
ENSG00000144488	ESPNL	chr2	238100158	238133287
ENSG00000186235	AC016757.3	chr2	238224553	238231677
ENSG00000065802	ASB1	chr2	238426743	238452250
ENSG00000130414	NDUFA10	chr2	239892451	240025402
ENSG00000142327	RNPEPL1	chr2	240565805	240581372
ENSG00000260942	CAPN10-AS1	chr2	240582701	240586699
ENSG00000178623	GPR35	chr2	240605432	240631259
ENSG00000130294	KIF1A	chr2	240713765	240820308
ENSG00000233392	AC104809.4	chr2	240954618	240967451
ENSG00000162804	SNED1	chr2	240998839	241095568
ENSG00000122085	MTERF4	chr2	241072170	241102332
ENSG00000115687	PASK	chr2	241106100	241150264
ENSG00000115685	PPP1R7	chr2	241149577	241183652
ENSG00000146205	ANO7	chr2	241188510	241225377
ENSG00000115677	HDLBP	chr2	241227265	241317061
ENSG00000168385	SEPTIN2	chr2	241315101	241354027
ENSG00000006607	FARP2	chr2	241356244	241494841
ENSG00000176720	BOK	chr2	241558722	241574138
ENSG00000168393	DTYMK	chr2	241675743	241686991
ENSG00000168395	ING5	chr2	241687086	241729478
ENSG00000180902	D2HGDH	chr2	241734580	241768816
ENSG00000224272	AC114730.3	chr2	241808313	241812016
ENSG00000237940	AC093642.3	chr2	241970684	241977276
ENSG00000280119	AC093642.1	chr2	242001210	242006013
ENSG00000261186	RP11-341N2.1	chr2	242087352	242088457
ENSG00000220804	AC093642.5	chr2	242088634	242160153
ENSG00000134121	CHL1	chr3	196597	409417
ENSG00000224957	LINC01266	chr3	536232	846015
ENSG00000134115	CNTN6	chr3	1092577	1404217
ENSG00000144619	CNTN4	chr3	2098814	3057956
ENSG00000113851	CRBN	chr3	3148993	3179710
ENSG00000271870	RP11-97C16.1	chr3	3152943	3153435
ENSG00000144455	SUMF1	chr3	3700815	4467281
ENSG00000150995	ITPR1	chr3	4493349	4847840
ENSG00000235831	BHLHE40-AS1	chr3	4896810	4979961
ENSG00000134108	ARL8B	chr3	5122221	5180912
ENSG00000227110	LMCD1-AS1	chr3	7952806	8611924
ENSG00000071282	LMCD1	chr3	8501708	8574673
ENSG00000180914	OXTR	chr3	8750409	8769628
ENSG00000070950	RAD18	chr3	8775403	8963773
ENSG00000196220	SRGAP3	chr3	8980592	9363053
ENSG00000206573	THUMPD3-AS1	chr3	9349690	9398579
ENSG00000134077	THUMPD3	chr3	9362843	9386791
ENSG00000250151	ARPC4-TTLL3	chr3	9793083	9835401
ENSG00000214021	TTLL3	chr3	9808087	9855138
ENSG00000156990	RPUSD3	chr3	9837850	9844602
ENSG00000171135	JAGN1	chr3	9890555	9894349
ENSG00000163702	IL17RC	chr3	9917075	9933630
ENSG00000163703	CRELD1	chr3	9933823	9945413
ENSG00000186162	CIDECP	chr3	10014239	10026365
ENSG00000144554	FANCD2	chr3	10026415	10101930
ENSG00000254999	BRK1	chr3	10115593	10127190
ENSG00000231177	LINC00852	chr3	10284420	10285746
ENSG00000240288	GHRLOS	chr3	10285755	10293449
ENSG00000226567	LINC00606	chr3	10759485	10764192
ENSG00000132164	SLC6A11	chr3	10816201	10940733
ENSG00000157103	SLC6A1	chr3	10992725	11039247
ENSG00000197548	ATG7	chr3	11272310	11557665
ENSG00000144560	VGLL4	chr3	11556071	11771350
ENSG00000144559	TAMM41	chr3	11790443	11846919
ENSG00000157152	SYN2	chr3	12004403	12191400
ENSG00000132170	PPARG	chr3	12287369	12434356
ENSG00000154743	TSEN2	chr3	12484433	12539623
ENSG00000075975	MKRN2	chr3	12557015	12583713
ENSG00000132155	RAF1	chr3	12583602	12664226
ENSG00000144712	CAND2	chr3	12796473	12871916
ENSG00000163520	FBLN2	chr3	13549132	13638422
ENSG00000170876	TMEM43	chr3	14124941	14143679
ENSG00000154767	XPC	chr3	14145148	14178783
ENSG00000255021	RP11-536I6.2	chr3	14272374	14303845
ENSG00000251576	LINC01267	chr3	14348452	14352568
ENSG00000131389	SLC6A6	chr3	14402577	14489349
ENSG00000154781	CCDC174	chr3	14651747	14672659
ENSG00000131379	C3orf20	chr3	14675100	14773034
ENSG00000225733	FGD5-AS1	chr3	14920348	14948424
ENSG00000177463	NR2C2	chr3	14947585	15053600
ENSG00000131368	MRPS25	chr3	15042461	15065335
ENSG00000131381	RBSN	chr3	15070074	15099163
ENSG00000131375	CAPN7	chr3	15206153	15252918
ENSG00000224660	SH3BP5-AS1	chr3	15254185	15264493
ENSG00000131370	SH3BP5	chr3	15254854	15341368
ENSG00000206562	METTL6	chr3	15381276	15440566
ENSG00000206561	COLQ	chr3	15450134	15521751
ENSG00000169814	BTD	chr3	15601342	15645822
ENSG00000206560	ANKRD28	chr3	15667237	15859771
ENSG00000270409	RP11-44D5.1	chr3	15732253	15733470
ENSG00000224728	AC090945.1	chr3	15878048	15879571
ENSG00000131386	GALNT15	chr3	16174650	16231992
ENSG00000154813	DPH3	chr3	16257979	16264972
ENSG00000154814	OXNAD1	chr3	16265161	16350299
ENSG00000131374	TBC1D5	chr3	17157163	18444817
ENSG00000182568	SATB1	chr3	18345388	18445588
ENSG00000163576	EFHB	chr3	19879473	19947025
ENSG00000144566	RAB5A	chr3	19947080	19985175
ENSG00000114166	KAT2B	chr3	20040024	20154404
ENSG00000151789	ZNF385D	chr3	21412223	22373321
ENSG00000182247	UBE2E2	chr3	23203021	23591793
ENSG00000174748	RPL15	chr3	23916546	23923692
ENSG00000151090	THRB	chr3	24117161	24495282
ENSG00000077092	RARB	chr3	25174333	25597932
ENSG00000077097	TOP2B	chr3	25597906	25664939
ENSG00000179796	LRRC3B	chr3	26622807	26710776
ENSG00000163491	NEK10	chr3	27110086	27369460
ENSG00000033867	SLC4A7	chr3	27372722	27484420
ENSG00000213846	AC098614.2	chr3	27632977	27635427
ENSG00000206559	ZCWPW2	chr3	28349147	28538122
ENSG00000163513	TGFBR2	chr3	30606503	30694142
ENSG00000144644	GADL1	chr3	30726201	30894765
ENSG00000091317	CMTM6	chr3	32481313	32503408
ENSG00000170266	GLB1	chr3	32996609	33097230
ENSG00000170275	CRTAP	chr3	33113980	33147773
ENSG00000173705	SUSD5	chr3	33150043	33219215
ENSG00000153558	FBXL2	chr3	33277026	33403662
ENSG00000153560	UBP1	chr3	33388337	33441371
ENSG00000163539	CLASP2	chr3	33496246	33718356
ENSG00000271324	RP11-10C24.2	chr3	33793645	33794145
ENSG00000271643	RP11-10C24.3	chr3	33795689	33796950
ENSG00000271020	RP11-10C24.1	chr3	33797150	33797681
ENSG00000170248	PDCD6IP	chr3	33798353	33869707
ENSG00000172995	ARPP21	chr3	35638946	35794496
ENSG00000144681	STAC	chr3	36380345	36548007
ENSG00000163673	DCLK3	chr3	36712423	36764349
ENSG00000230067	HSPD1P6	chr3	36767118	36784167
ENSG00000281100	RP11-640L9.2	chr3	36823152	36825158
ENSG00000076242	MLH1	chr3	36993333	37050918
ENSG00000093167	LRRFIP2	chr3	37052657	37183689
ENSG00000198590	C3orf35	chr3	37386270	37435497
ENSG00000136059	VILL	chr3	37988060	38007188
ENSG00000093217	XYLB	chr3	38346761	38421348
ENSG00000229589	ACVR2B-AS1	chr3	38451028	38454820
ENSG00000157036	EXOG	chr3	38496128	38542161
ENSG00000183873	SCN5A	chr3	38548058	38649673
ENSG00000114742	WDR48	chr3	39051999	39096671
ENSG00000168026	TTC21A	chr3	39107705	39138903
ENSG00000144659	SLC25A38	chr3	39383349	39397351
ENSG00000168028	RPSA	chr3	39406690	39412542
ENSG00000280739	EIF1B-AS1	chr3	40173146	40309698
ENSG00000223797	ENTPD3-AS1	chr3	40313803	40453329
ENSG00000188846	RPL14	chr3	40457293	40468587
ENSG00000172888	ZNF621	chr3	40524879	40574685
ENSG00000168038	ULK4	chr3	41246600	41962430
ENSG00000182606	TRAK1	chr3	42013803	42225889
ENSG00000157093	LYZL4	chr3	42397079	42410600
ENSG00000114812	VIPR1	chr3	42489300	42537573
ENSG00000093183	SEC22C	chr3	42547970	42601080
ENSG00000114857	NKTR	chr3	42600615	42648741
ENSG00000114853	ZBTB47	chr3	42653685	42665854
ENSG00000010282	HHATL	chr3	42692664	42702827
ENSG00000144648	ACKR2	chr3	42804753	42887974
ENSG00000273291	RP11-136C24.3	chr3	42809447	43055871
ENSG00000240747	KRBOX1	chr3	42809484	42942792
ENSG00000144649	FAM198A	chr3	42979268	43060211
ENSG00000163788	SNRK	chr3	43286513	43424764
ENSG00000271941	RP11-188P20.3	chr3	43346924	43347643
ENSG00000179152	TCAIM	chr3	44338120	44409451
ENSG00000196345	ZKSCAN7	chr3	44555194	44594173
ENSG00000144792	ZNF660	chr3	44578224	44599694
ENSG00000186448	ZNF197	chr3	44584889	44648471
ENSG00000163807	KIAA1143	chr3	44737662	44761662
ENSG00000163808	KIF15	chr3	44761718	44873376
ENSG00000169964	TMEM42	chr3	44861870	44865670
ENSG00000075914	EXOSC7	chr3	44975242	45036066
ENSG00000011376	LARS2	chr3	45388507	45549421
ENSG00000144791	LIMD1	chr3	45555395	45686338
ENSG00000163820	FYCO1	chr3	45917900	45995824
ENSG00000178038	ALS2CL	chr3	46668998	46693704
ENSG00000181585	TMIE	chr3	46701334	46710886
ENSG00000160799	CCDC12	chr3	46921727	46982010
ENSG00000160796	NBEAL2	chr3	46979684	47009703
ENSG00000114650	SCAP	chr3	47413695	47477126
ENSG00000114646	CSPG5	chr3	47562240	47580792
ENSG00000173473	SMARCC1	chr3	47585273	47782106
ENSG00000164045	CDC25A	chr3	48157147	48188402
ENSG00000164048	ZNF589	chr3	48241101	48299253
ENSG00000228638	FCF1P2	chr3	48290794	48291375
ENSG00000172113	NME6	chr3	48293265	48301685
ENSG00000232112	TMA7	chr3	48440258	48444208
ENSG00000008300	CELSR3	chr3	48636470	48662915
ENSG00000213672	NCKIPSD	chr3	48673845	48686364
ENSG00000068745	IP6K2	chr3	48688004	48740353
ENSG00000224424	PRKAR2A-AS1	chr3	48847573	48851981
ENSG00000221883	ARIH2OS	chr3	48917789	48919385
ENSG00000177479	ARIH2	chr3	48918822	48986382
ENSG00000178467	P4HTM	chr3	48989887	49007154
ENSG00000178149	DALRD3	chr3	49015489	49022293
ENSG00000178057	NDUFAF3	chr3	49020460	49023495
ENSG00000198218	QRICH1	chr3	49029708	49094363
ENSG00000177352	CCDC71	chr3	49162536	49166321
ENSG00000173421	CCDC36	chr3	49198429	49258104
ENSG00000188315	C3orf62	chr3	49268603	49277909
ENSG00000114316	USP4	chr3	49277832	49340712
ENSG00000145020	AMT	chr3	49416776	49422753
ENSG00000283189	RP11-949J7.8	chr3	49416778	49429314
ENSG00000173402	DAG1	chr3	49468704	49535618
ENSG00000226913	BSN-AS2	chr3	49549307	49554366
ENSG00000173531	MST1	chr3	49683948	49689501
ENSG00000164068	RNF123	chr3	49689500	49721529
ENSG00000173540	GMPPB	chr3	49716845	49723951
ENSG00000183763	TRAIP	chr3	49828600	49856574
ENSG00000164076	CAMKV	chr3	49857989	49870222
ENSG00000004534	RBM6	chr3	49940008	50100045
ENSG00000003756	RBM5	chr3	50088909	50119021
ENSG00000230454	U73166.2	chr3	50260304	50263358
ENSG00000214706	IFRD2	chr3	50287733	50292918
ENSG00000186792	HYAL3	chr3	50292832	50299468
ENSG00000243477	NAT6	chr3	50296403	50299421
ENSG00000114378	HYAL1	chr3	50299890	50312381
ENSG00000068001	HYAL2	chr3	50317791	50322906
ENSG00000114395	CYB561D2	chr3	50350696	50358460
ENSG00000126062	TMEM115	chr3	50354750	50359610
ENSG00000114735	HEMK1	chr3	50569153	50596168
ENSG00000114738	MAPKAPK3	chr3	50611521	50649297
ENSG00000273356	RP11-804H8.6	chr3	50669990	50672048
ENSG00000088538	DOCK3	chr3	50675242	51384198
ENSG00000145050	MANF	chr3	51385048	51389397
ENSG00000164080	RAD54L2	chr3	51541145	51668667
ENSG00000164081	TEX264	chr3	51662694	51704323
ENSG00000280422	RP11-155D18.13	chr3	51951850	51953902
ENSG00000090097	PCBP4	chr3	51957455	51974016
ENSG00000114786	ABHD14A-ACY1	chr3	51974707	51989183
ENSG00000164088	PPM1M	chr3	52245794	52250597
ENSG00000164091	WDR82	chr3	52254422	52288020
ENSG00000168237	GLYCTK	chr3	52287090	52293476
ENSG00000114841	DNAH1	chr3	52316320	52400491
ENSG00000168268	NT5DC2	chr3	52524386	52535054
ENSG00000163938	GNL3	chr3	52681157	52694492
ENSG00000016864	GLT8D1	chr3	52694486	52706083
ENSG00000114902	SPCS1	chr3	52704956	52711146
ENSG00000114904	NEK4	chr3	52708450	52770949
ENSG00000055955	ITIH4	chr3	52812976	52831479
ENSG00000243696	RP5-966M1.6	chr3	52813283	52835729
ENSG00000248592	TMEM110-MUSTN1	chr3	52833122	52897562
ENSG00000213533	TMEM110	chr3	52836220	52897596
ENSG00000163935	SFMBT1	chr3	52903573	53046750
ENSG00000163933	RFT1	chr3	53088484	53130462
ENSG00000163932	PRKCD	chr3	53156010	53192717
ENSG00000163931	TKT	chr3	53224708	53256052
ENSG00000272886	DCP1A	chr3	53283429	53347610
ENSG00000157388	CACNA1D	chr3	53328964	53813733
ENSG00000056736	IL17RB	chr3	53846581	53865800
ENSG00000271976	RP11-884K10.7	chr3	53858995	53861576
ENSG00000113812	ACTR8	chr3	53867067	53882202
ENSG00000113811	SELK	chr3	53884411	53891988
ENSG00000144771	LRTM1	chr3	54918238	54967088
ENSG00000114251	WNT5A	chr3	55465716	55490539
ENSG00000187672	ERC2	chr3	55508309	56468363
ENSG00000180376	CCDC66	chr3	56557162	56621818
ENSG00000163946	FAM208A	chr3	56620134	56683237
ENSG00000157500	APPL1	chr3	57227738	57273468
ENSG00000174844	DNAH12	chr3	57293700	57544344
ENSG00000174839	DENND6A	chr3	57625458	57693089
ENSG00000163681	SLMAP	chr3	57755451	57929168
ENSG00000136068	FLNB	chr3	58008401	58172251
ENSG00000163686	ABHD6	chr3	58237507	58295693
ENSG00000163684	RPP14	chr3	58306248	58324695
ENSG00000168297	PXK	chr3	58332881	58426126
ENSG00000168291	PDHB	chr3	58427631	58433857
ENSG00000272182	RP11-802O23.3	chr3	58428256	58428815
ENSG00000168301	KCTD6	chr3	58492115	58502360
ENSG00000168306	ACOX2	chr3	58505137	58537319
ENSG00000168309	FAM107A	chr3	58564118	58627610
ENSG00000189283	FHIT	chr3	59749311	61251459
ENSG00000241472	PTPRG-AS1	chr3	62260866	62369330
ENSG00000114405	C3orf14	chr3	62318974	62336213
ENSG00000163618	CADPS	chr3	62398347	62875389
ENSG00000224479	AC136289.1	chr3	63741828	63827445
ENSG00000163634	THOC7	chr3	63833871	63863903
ENSG00000239653	PSMD6-AS2	chr3	64004023	64012148
ENSG00000163637	PRICKLE2	chr3	64093868	64445476
ENSG00000151276	MAGI1	chr3	65353526	66038834
ENSG00000144741	SLC25A26	chr3	66133611	66388116
ENSG00000172340	SUCLG2	chr3	67360461	67654614
ENSG00000241316	SUCLG2-AS1	chr3	67654698	67947713
ENSG00000163377	FAM19A4	chr3	68731767	68953297
ENSG00000163378	EOGT	chr3	68975215	69013961
ENSG00000144746	ARL6IP5	chr3	69084945	69106066
ENSG00000163380	LMOD3	chr3	69106873	69123032
ENSG00000114541	FRMD4B	chr3	69169991	69542583
ENSG00000163412	EIF4E3	chr3	71675417	71754773
ENSG00000170837	GPR27	chr3	71754051	71756496
ENSG00000243083	LINC00870	chr3	72151258	72174332
ENSG00000163605	PPP4R2	chr3	72996786	73069199
ENSG00000255423	EBLN2	chr3	73061660	73063337
ENSG00000113805	CNTN3	chr3	74262569	74521140
ENSG00000213300	HNRNPA3P6	chr3	75214632	75215636
ENSG00000244026	FAM86DP	chr3	75421553	75435110
ENSG00000227124	ZNF717	chr3	75709644	75785583
ENSG00000169855	ROBO1	chr3	78597241	79767815
ENSG00000175161	CADM2	chr3	84958982	86074429
ENSG00000243915	THAP12P2	chr3	86012562	86015120
ENSG00000206538	VGLL3	chr3	86876389	86991119
ENSG00000281392	LINC00506	chr3	87089130	87157069
ENSG00000083937	CHMP2B	chr3	87227272	87255548
ENSG00000179097	HTR1F	chr3	87990697	87993835
ENSG00000163320	CGGBP1	chr3	88051945	88149885
ENSG00000179021	C3orf38	chr3	88149744	88168729
ENSG00000044524	EPHA3	chr3	89107525	89482134
ENSG00000178700	DHFRL1	chr3	94047837	94063389
ENSG00000080200	CRYBG3	chr3	97822041	97944963
ENSG00000183185	GABRR3	chr3	97986674	98035304
ENSG00000080819	CPOX	chr3	98521133	98593723
ENSG00000057019	DCBLD2	chr3	98795942	98901689
ENSG00000144810	COL8A1	chr3	99638476	99799226
ENSG00000273374	RP11-383I23.2	chr3	99802700	99806058
ENSG00000184220	CMSS1	chr3	99817835	100181732
ENSG00000114021	NIT2	chr3	100334702	100361635
ENSG00000154174	TOMM70	chr3	100363432	100401398
ENSG00000206535	LNP1	chr3	100401194	100456319
ENSG00000114354	TFG	chr3	100709332	100748966
ENSG00000154175	ABI3BP	chr3	100749157	100993515
ENSG00000138468	SENP7	chr3	101324206	101513241
ENSG00000081154	PCNP	chr3	101574096	101594437
ENSG00000066422	ZBTB11	chr3	101648890	101677495
ENSG00000244119	PDCL3P4	chr3	101712473	101713191
ENSG00000182504	CEP97	chr3	101723926	101770562
ENSG00000144815	NXPE3	chr3	101779203	101827392
ENSG00000170017	ALCAM	chr3	105366910	105576900
ENSG00000114423	CBLB	chr3	105655462	105869552
ENSG00000243701	DUBR	chr3	107240693	107326964
ENSG00000279277	RP11-861A13.3	chr3	108036719	108038445
ENSG00000196776	CD47	chr3	108043299	108091025
ENSG00000114446	IFT57	chr3	108160813	108222570
ENSG00000144821	MYH15	chr3	108380370	108529322
ENSG00000163507	KIAA1524	chr3	108549870	108589644
ENSG00000198919	DZIP3	chr3	108589683	108694846
ENSG00000138472	GUCA1C	chr3	108907793	108953895
ENSG00000177707	NECTIN3	chr3	111070072	111275563
ENSG00000144824	PHLDB2	chr3	111732498	111976517
ENSG00000144834	TAGLN3	chr3	111998665	112013887
ENSG00000091972	CD200	chr3	112332348	112362812
ENSG00000138459	SLC35A5	chr3	112561710	112585577
ENSG00000091986	CCDC80	chr3	112596795	112649530
ENSG00000163607	GTPBP8	chr3	112990919	113015060
ENSG00000163608	NEPRO	chr3	113002441	113019861
ENSG00000144857	BOC	chr3	113211004	113287459
ENSG00000206530	CFAP44	chr3	113286948	113441610
ENSG00000283241	AC026348.1	chr3	113291558	113433664
ENSG00000163611	SPICE1	chr3	113442719	113515187
ENSG00000072858	SIDT1	chr3	113532297	113629578
ENSG00000178075	GRAMD1C	chr3	113828183	113947174
ENSG00000181847	TIGIT	chr3	114276914	114310288
ENSG00000181722	ZBTB20	chr3	114314502	115147271
ENSG00000259976	MIR568	chr3	114314502	114329714
ENSG00000172020	GAP43	chr3	115623325	115721490
ENSG00000144847	IGSF11	chr3	118900558	119146068
ENSG00000176142	TMEM39A	chr3	119429501	119468830
ENSG00000163389	POGLUT1	chr3	119468939	119494708
ENSG00000113845	TIMMDC1	chr3	119498533	119525090
ENSG00000144843	ADPRH	chr3	119579269	119589945
ENSG00000121577	POPDC2	chr3	119636458	119665324
ENSG00000183833	MAATS1	chr3	119703023	119767102
ENSG00000144852	NR1I2	chr3	119780485	119818485
ENSG00000082701	GSK3B	chr3	119821324	120094417
ENSG00000153767	GTF2E1	chr3	120742638	120783069
ENSG00000145087	STXBP5L	chr3	120908073	121424761
ENSG00000173226	IQCB1	chr3	121769764	121835079
ENSG00000163406	SLC15A2	chr3	121894090	121944102
ENSG00000114013	CD86	chr3	122055367	122121139
ENSG00000160124	CCDC58	chr3	122359592	122383231
ENSG00000114023	FAM162A	chr3	122384177	122412334
ENSG00000196981	WDR5B	chr3	122412333	122416051
ENSG00000272758	RP11-299J3.8	chr3	122416208	122443180
ENSG00000169087	HSPBAP1	chr3	122740004	122793824
ENSG00000138463	DIRC2	chr3	122794796	122881139
ENSG00000273033	RP11-67L2.2	chr3	122886942	122892416
ENSG00000082684	SEMA5B	chr3	122909194	123028605
ENSG00000121542	SEC22A	chr3	123201928	123274130
ENSG00000173175	ADCY5	chr3	123282297	123449758
ENSG00000206527	HACD2	chr3	123490821	123585185
ENSG00000239523	MYLK-AS1	chr3	123585543	123644568
ENSG00000160145	KALRN	chr3	124080024	124726325
ENSG00000114491	UMPS	chr3	124730367	124749273
ENSG00000082781	ITGB5	chr3	124761949	124901418
ENSG00000173706	HEG1	chr3	124965711	125055958
ENSG00000144909	OSBPL11	chr3	125528859	125595090
ENSG00000241288	RP11-379B18.5	chr3	125827239	125916384
ENSG00000171084	FAM86JP	chr3	125916621	125930024
ENSG00000114544	SLC41A3	chr3	126006356	126101561
ENSG00000163884	KLF15	chr3	126342636	126357442
ENSG00000070476	ZXDC	chr3	126437602	126475919
ENSG00000197763	TXNRD3	chr3	126607053	126655155
ENSG00000163870	TPRA1	chr3	127573070	127598251
ENSG00000114631	PODXL2	chr3	127629182	127672809
ENSG00000187715	KBTBD12	chr3	127915233	127987671
ENSG00000175792	RUVBL1	chr3	128064779	128153914
ENSG00000132394	EEFSEC	chr3	128153455	128408646
ENSG00000163902	RPN1	chr3	128619971	128681075
ENSG00000075785	RAB7A	chr3	128726123	128814796
ENSG00000261159	RP11-723O4.9	chr3	128859717	128860526
ENSG00000231305	RP11-723O4.2	chr3	128861314	128871540
ENSG00000177646	ACAD9	chr3	128879597	128916067
ENSG00000251474	RPL32P3	chr3	129382923	129399655
ENSG00000163913	IFT122	chr3	129440037	129520507
ENSG00000170893	TRH	chr3	129974306	129977938
ENSG00000249846	RP11-77P16.4	chr3	130112551	130120579
ENSG00000228252	COL6A4P2	chr3	130212824	130273806
ENSG00000017260	ATP2C1	chr3	130850596	131016712
ENSG00000250592	RP11-39E3.3	chr3	130899415	130929976
ENSG00000114670	NEK11	chr3	131026851	131350465
ENSG00000246082	NUDT16P1	chr3	131361899	131365122
ENSG00000198585	NUDT16	chr3	131381672	131388830
ENSG00000196353	CPNE4	chr3	131533556	132285410
ENSG00000138246	DNAJC13	chr3	132417527	132539032
ENSG00000240303	ACAD11	chr3	132558139	132660723
ENSG00000113971	NPHP3	chr3	132680610	132722442
ENSG00000091513	TF	chr3	133745957	133779006
ENSG00000144867	SRPRB	chr3	133784034	133825772
ENSG00000260633	RP11-375I20.6	chr3	134347289	134349233
ENSG00000129055	ANAPC13	chr3	134477707	134486716
ENSG00000182923	CEP63	chr3	134485744	134575017
ENSG00000073711	PPP2R3A	chr3	135965674	136147891
ENSG00000114054	PCCB	chr3	136250307	136337896
ENSG00000261758	RP11-102M11.2	chr3	136752631	136755780
ENSG00000273486	RP11-731C17.2	chr3	136837339	136839021
ENSG00000239213	NCK1-AS1	chr3	136841727	136862054
ENSG00000158163	DZIP1L	chr3	138061991	138115818
ENSG00000181322	NME9	chr3	138261438	138329886
ENSG00000158234	FAIM	chr3	138608607	138633376
ENSG00000051382	PIK3CB	chr3	138652700	138834938
ENSG00000184432	COPB2	chr3	139355601	139389732
ENSG00000114115	RBP1	chr3	139517435	139539829
ENSG00000163864	NMNAT3	chr3	139560181	139678017
ENSG00000250543	RP11-442N1.1	chr3	139688404	139689342
ENSG00000158258	CLSTN2	chr3	139935186	140577397
ENSG00000177311	ZBTB38	chr3	141324214	141449792
ENSG00000155903	RASA2	chr3	141487048	141615342
ENSG00000114124	GRK7	chr3	141778149	141818490
ENSG00000175066	GK5	chr3	142157528	142225607
ENSG00000114127	XRN1	chr3	142306608	142448062
ENSG00000175054	ATR	chr3	142449236	142578826
ENSG00000120756	PLS1	chr3	142596388	142713664
ENSG00000163710	PCOLCE2	chr3	142815923	142889203
ENSG00000188582	PAQR9	chr3	142949165	142963682
ENSG00000241570	PAQR9-AS1	chr3	142960651	143001559
[truncated: 7,396 more rows]
