# Supplementary material for: QTL mapping of human retina DNA methylation identifies 87 gene-epigenome interactions in age-related macular degeneration
Source: Research Square preprint supplement (doi:10.21203/rs.3.rs-3011096/v1), 2023-06-16
Supplement: Supplementary file 88 [file Supplementary_Table37.xlsx]

## Sheet: M2E_SMR_CRE
chr	exposure	trait	top_snp	Gene_symbol	bxy	bxy_se	bxy_pval	heidi_pval	Biotype	HEIDI_Pvalue_Significant	Target gene based on CRE
chr1	cg24323958	ENSG00000085491	rs72693452	SLC25A24	-12.007	1.99086	1.62871e-09	0.949519	protein_coding	TRUE	SLC25A24
chr1	cg13387374	ENSG00000127463	rs3748757	EMC1	-88.6397	16.7572	1.22554e-07	0.930685	protein_coding	TRUE	EMC1
chr1	cg26204283	ENSG00000000457	rs79945836	SCYL3	-4.00036	0.807218	7.20567e-07	0.922803	protein_coding	TRUE	SCYL3
chr1	cg09122657	ENSG00000049239	rs11121349	H6PD	-17.5832	2.35574	8.39351e-14	0.890154	protein_coding	TRUE	H6PD
chr1	cg25763306	ENSG00000270035	rs12747548	RP11-338N10.2	-1.12179	0.161553	3.81764e-12	0.886751	lincRNA	TRUE	RP11-338N10.2
chr1	cg18801370	ENSG00000143442	rs12071705	POGZ	-27.3201	4.27921	1.72088e-10	0.785515	protein_coding	TRUE	POGZ
chr1	cg10234330	ENSG00000224358	rs7518099	RP11-466F5.8	-1.22431	0.220883	2.97673e-08	0.783345	antisense	TRUE	RP11-466F5.8
chr1	cg07302580	ENSG00000081277	rs11801270	PKP1	-129.197	22.8339	1.53052e-08	0.758408	protein_coding	TRUE	PKP1
chr1	cg23594461	ENSG00000081248	rs2281845	CACNA1S	-6.80111	1.15363	3.73773e-09	0.755695	protein_coding	TRUE	CACNA1S
chr1	cg08700651	ENSG00000185436	rs12094257	IFNLR1	-6.1826	1.25886	9.04921e-07	0.727267	protein_coding	TRUE	IFNLR1
chr1	cg17457884	ENSG00000204138	rs11247790	PHACTR4	17.4952	3.55086	8.3491e-07	0.681439	protein_coding	TRUE	PHACTR4
chr1	cg08587864	ENSG00000135845	rs3213563	PIGC	-1.94226	0.371506	1.71294e-07	0.632178	protein_coding	TRUE	PIGC
chr1	cg03579872	ENSG00000116171	rs1242331	SCP2	-16.5876	1.77931	1.13668e-20	0.619584	protein_coding	TRUE	SCP2
chr1	cg04923746	ENSG00000223649	rs10863899	RP11-359E8.3	-0.612375	0.0928005	4.14418e-11	0.612338	lincRNA	TRUE	RP11-359E8.3
chr1	cg16413020	ENSG00000213625	rs12145690	LEPROT	8.01989	1.38172	6.46363e-09	0.574383	protein_coding	TRUE	LEPROT
chr1	cg27529520	ENSG00000117115	rs1022579	PADI2	-63.2115	7.05682	3.32112e-19	0.566623	protein_coding	TRUE	PADI2
chr1	cg14976592	ENSG00000213625	rs12145690	LEPROT	4.56316	0.702241	8.1395e-11	0.563282	protein_coding	TRUE	LEPROT
chr1	cg19716264	ENSG00000203666	rs61844237	EFCAB2	-20.5567	1.63962	4.65557e-36	0.550381	protein_coding	TRUE	EFCAB2
chr1	cg04906435	ENSG00000116514	rs171837	RNF19B	-19.8988	3.60995	3.54347e-08	0.53706	protein_coding	TRUE	RNF19B
chr1	cg08859206	ENSG00000116171	rs1242331	SCP2	-10.8173	1.21214	4.49163e-19	0.531422	protein_coding	TRUE	SCP2
chr1	cg24083324	ENSG00000274895	rs340838	RP11-478J18.2	14.1397	1.96546	6.28873e-13	0.523282	antisense	TRUE	RP11-478J18.2
chr1	cg08885800	ENSG00000081248	rs7516023	CACNA1S	-3.08417	0.460005	2.019e-11	0.508648	protein_coding	TRUE	CACNA1S
chr1	cg08510884	ENSG00000143198	rs12040685	MGST3	-16.1505	2.14728	5.42111e-14	0.493504	protein_coding	TRUE	MGST3
chr1	cg14810798	ENSG00000230461	rs340879	PROX1-AS1	-15.9223	2.4214	4.8443e-11	0.476997	processed_transcript	TRUE	PROX1-AS1
chr1	cg17766148	ENSG00000081248	rs4498834	CACNA1S	-3.55418	0.600957	3.33486e-09	0.467397	protein_coding	TRUE	CACNA1S
chr1	cg07092448	ENSG00000203288	rs1521185	RP11-98D18.9	0.531232	0.108255	9.23796e-07	0.465771	antisense	TRUE	RP11-98D18.9
chr1	cg16835277	ENSG00000117115	rs1022579	PADI2	-127.829	17.4972	2.75858e-13	0.458	protein_coding	TRUE	PADI2
chr1	cg04310824	ENSG00000116171	rs1242331	SCP2	-31.3521	4.82403	8.07752e-11	0.436297	protein_coding	TRUE	SCP2
chr1	cg02813845	ENSG00000116171	rs1242331	SCP2	-8.4304	0.845495	2.04231e-23	0.434766	protein_coding	TRUE	SCP2
chr1	cg18379824	ENSG00000132906	rs4593819	CASP9	3.28885	0.426783	1.2968e-14	0.415254	protein_coding	TRUE	CASP9
chr1	cg25767906	ENSG00000116171	rs1242331	SCP2	-10.4479	1.06454	9.75272e-23	0.411875	protein_coding	TRUE	SCP2
chr1	cg23874078	ENSG00000156171	rs3762374	DRAM2	7.91365	0.994668	1.77593e-15	0.398878	protein_coding	TRUE	DRAM2
chr1	cg19352308	ENSG00000163354	rs4845405	DCST2	18.4883	2.93546	3.01003e-10	0.391905	protein_coding	TRUE	DCST2
chr1	cg24484971	ENSG00000223649	rs10863899	RP11-359E8.3	-0.701815	0.116716	1.82087e-09	0.38767	lincRNA	TRUE	RP11-359E8.3
chr1	cg03609269	ENSG00000116171	rs1242331	SCP2	-11.4194	1.17902	3.47425e-22	0.386256	protein_coding	TRUE	SCP2
chr1	cg05918124	ENSG00000085491	rs61799377	SLC25A24	-8.19948	1.17347	2.80085e-12	0.376735	protein_coding	TRUE	SLC25A24
chr1	cg01802117	ENSG00000116171	rs1242331	SCP2	-5.87309	0.591554	3.13768e-23	0.363771	protein_coding	TRUE	SCP2
chr1	cg20694572	ENSG00000237975	rs1496042	FLG-AS1	5.36692	1.02444	1.61545e-07	0.358696	antisense	TRUE	FLG-AS1
chr1	cg27535305	ENSG00000116171	rs1242331	SCP2	-12.297	1.20569	2.00037e-24	0.356772	protein_coding	TRUE	SCP2
chr1	cg09737265	ENSG00000162669	rs17131429	HFM1	-14.9571	2.4068	5.14758e-10	0.353305	protein_coding	TRUE	HFM1
chr1	cg20630926	ENSG00000117461	rs9429095	PIK3R3	-38.7256	5.47903	1.57228e-12	0.346205	protein_coding	TRUE	PIK3R3
chr1	cg10799510	ENSG00000081277	rs11801270	PKP1	-142.884	27.8454	2.87698e-07	0.342498	protein_coding	TRUE	PKP1
chr1	cg00658007	ENSG00000223649	rs1122745	RP11-359E8.3	-0.421515	0.0673023	3.77594e-10	0.335527	lincRNA	TRUE	RP11-359E8.3
chr1	cg09319435	ENSG00000142655	rs2026792	PEX14	-21.7064	2.5999	6.88845e-17	0.302925	protein_coding	TRUE	PEX14
chr1	cg04181682	ENSG00000117461	rs1707302	PIK3R3	-15.9163	1.34558	2.77915e-32	0.301442	protein_coding	TRUE	PIK3R3
chr1	cg07568418	ENSG00000179163	rs2070954	FUCA1	0.854033	0.163415	1.73078e-07	0.293344	protein_coding	TRUE	FUCA1
chr1	cg20055417	ENSG00000116171	rs1242331	SCP2	-7.21994	0.71593	6.45641e-24	0.287825	protein_coding	TRUE	SCP2
chr1	cg01849514	ENSG00000085491	rs72693452	SLC25A24	-6.07196	1.06082	1.04134e-08	0.287101	protein_coding	TRUE	SLC25A24
chr1	cg27584146	ENSG00000117461	rs1416706	PIK3R3	-20.1019	2.06814	2.48303e-22	0.279702	protein_coding	TRUE	PIK3R3
chr1	cg16341373	ENSG00000116922	rs568817	C1orf109	1.88432	0.346991	5.62078e-08	0.277489	protein_coding	TRUE	C1orf109
chr1	cg06753273	ENSG00000223649	rs1122745	RP11-359E8.3	-0.391491	0.0636758	7.83692e-10	0.275138	lincRNA	TRUE	RP11-359E8.3
chr1	cg24083324	ENSG00000230461	rs340838	PROX1-AS1	16.9301	3.02096	2.09193e-08	0.269408	processed_transcript	TRUE	PROX1-AS1
chr1	cg06974930	ENSG00000117461	rs9429095	PIK3R3	-41.6402	5.30987	4.43296e-15	0.267885	protein_coding	TRUE	PIK3R3
chr1	cg14806693	ENSG00000116514	rs171837	RNF19B	-8.62852	0.997575	5.17242e-18	0.267092	protein_coding	TRUE	RNF19B
chr1	cg21504176	ENSG00000163354	rs4845704	DCST2	27.5621	4.96618	2.85752e-08	0.258164	protein_coding	TRUE	DCST2
chr1	cg27398908	ENSG00000223649	rs7527603	RP11-359E8.3	-0.94311	0.190738	7.63265e-07	0.231309	lincRNA	TRUE	RP11-359E8.3
chr1	cg27182133	ENSG00000142655	rs2150038	PEX14	-27.0781	4.43655	1.03818e-09	0.228242	protein_coding	TRUE	PEX14
chr1	cg04607379	ENSG00000142655	rs2026792	PEX14	-15.2562	1.84561	1.38303e-16	0.221836	protein_coding	TRUE	PEX14
chr1	cg06642677	ENSG00000182004	rs11240607	SNRPE	2.53731	0.390391	8.06337e-11	0.21438	protein_coding	TRUE	SNRPE
chr1	cg05918124	ENSG00000260879	rs61799377	RP11-483I13.5	-0.809126	0.144091	1.96141e-08	0.203875	antisense	TRUE	RP11-483I13.5
chr1	cg10512769	ENSG00000198570	rs12733443	RD3	-16.934	3.04059	2.55724e-08	0.192574	protein_coding	TRUE	RD3
chr1	cg03579872	ENSG00000121310	rs1242331	ECHDC2	-21.5825	3.73214	7.34404e-09	0.190203	protein_coding	TRUE	ECHDC2
chr1	cg08859206	ENSG00000121310	rs1242331	ECHDC2	-14.0747	2.47623	1.31639e-08	0.188436	protein_coding	TRUE	ECHDC2
chr1	cg03609269	ENSG00000121310	rs1242331	ECHDC2	-14.8581	2.5327	4.45122e-09	0.157224	protein_coding	TRUE	ECHDC2
chr1	cg26011752	ENSG00000117461	rs1707302	PIK3R3	-37.333	4.01587	1.45339e-20	0.15162	protein_coding	TRUE	PIK3R3
chr1	cg02813845	ENSG00000121310	rs1242331	ECHDC2	-10.969	1.85031	3.06313e-09	0.144439	protein_coding	TRUE	ECHDC2
chr1	cg27535305	ENSG00000121310	rs1242331	ECHDC2	-16	2.67778	2.29969e-09	0.136229	protein_coding	TRUE	ECHDC2
chr1	cg25767906	ENSG00000121310	rs1242331	ECHDC2	-13.594	2.3061	3.75163e-09	0.130551	protein_coding	TRUE	ECHDC2
chr1	cg01802117	ENSG00000121310	rs1242331	ECHDC2	-7.6416	1.29099	3.23589e-09	0.125695	protein_coding	TRUE	ECHDC2
chr1	cg05531421	ENSG00000116675	rs10789179	DNAJC6	19.8523	3.19629	5.26401e-10	0.122897	protein_coding	TRUE	DNAJC6
chr1	cg14122995	ENSG00000117461	rs1707302	PIK3R3	-57.4563	11.1428	2.51774e-07	0.114592	protein_coding	TRUE	PIK3R3
chr1	cg06992877	ENSG00000272195	rs7545078	RP11-156E8.1	1.92096	0.287223	2.26175e-11	0.106842	antisense	TRUE	RP11-156E8.1
chr1	cg12908607	ENSG00000117407	rs12127737	ARTN	0.423405	0.0744365	1.28439e-08	0.101264	protein_coding	TRUE	ARTN
chr1	cg06792911	ENSG00000227533	rs17387775	SLC2A1-AS1	-5.10836	0.418149	2.53452e-34	0.0992298	lincRNA	TRUE	SLC2A1-AS1
chr1	cg16819028	ENSG00000081277	rs12117501	PKP1	-90.0096	15.5287	6.77763e-09	0.097915	protein_coding	TRUE	PKP1
chr1	cg20055417	ENSG00000121310	rs1242331	ECHDC2	-9.39402	1.57834	2.65179e-09	0.0953521	protein_coding	TRUE	ECHDC2
chr1	cg14810798	ENSG00000274895	rs340879	RP11-478J18.2	-11.6309	1.3914	6.32074e-17	0.0847483	antisense	TRUE	RP11-478J18.2
chr1	cg20677516	ENSG00000228288	rs2275895	PCAT6	-7.92631	1.1075	8.25042e-13	0.0800014	antisense	TRUE	PCAT6
chr1	cg10512769	ENSG00000223649	rs12733443	RP11-359E8.3	-0.274189	0.040304	1.0244e-11	0.070516	lincRNA	TRUE	RP11-359E8.3
chr1	cg09003612	ENSG00000227533	rs17387775	SLC2A1-AS1	-2.61075	0.163219	1.37627e-57	0.0538285	lincRNA	TRUE	SLC2A1-AS1
chr10	cg01217608	ENSG00000271335	rs71033392	RP11-324I22.4	4.52199	0.914557	7.63527e-07	0.930016	antisense	TRUE	RP11-324I22.4
chr10	cg13596132	ENSG00000227165	rs10886785	WDR11-AS1	-1.48752	0.227379	6.06977e-11	0.89029	antisense	TRUE	WDR11-AS1
chr10	cg09943237	ENSG00000226864	rs10887024	ATE1-AS1	-0.823363	0.0675045	3.21833e-34	0.857768	transcribed_unitary_pseudogene	TRUE	ATE1-AS1
chr10	cg04970100	ENSG00000166033	rs4752700	HTRA1	-63.8171	11.4958	2.83493e-08	0.830425	protein_coding	TRUE	HTRA1
chr10	cg13320271	ENSG00000226864	rs10887024	ATE1-AS1	4.88185	0.798531	9.74479e-10	0.829441	transcribed_unitary_pseudogene	TRUE	ATE1-AS1
chr10	cg07444487	ENSG00000226864	rs10887024	ATE1-AS1	-0.630492	0.0493407	2.16685e-37	0.819445	transcribed_unitary_pseudogene	TRUE	ATE1-AS1
chr10	cg24120153	ENSG00000227165	rs10886785	WDR11-AS1	-0.91101	0.12502	3.17117e-13	0.77041	antisense	TRUE	WDR11-AS1
chr10	cg18675610	ENSG00000165322	rs144466157	ARHGAP12	-19.9258	1.91384	2.19839e-25	0.758987	protein_coding	TRUE	ARHGAP12
chr10	cg16466810	ENSG00000166033	rs4237540	HTRA1	-73.0483	12.2664	2.59843e-09	0.733313	protein_coding	TRUE	HTRA1
chr10	cg13812702	ENSG00000226864	rs10887024	ATE1-AS1	-0.861125	0.0707089	4.04835e-34	0.732601	transcribed_unitary_pseudogene	TRUE	ATE1-AS1
chr10	cg20835665	ENSG00000226864	rs10887024	ATE1-AS1	-0.711136	0.0583938	4.05751e-34	0.719161	transcribed_unitary_pseudogene	TRUE	ATE1-AS1
chr10	cg11364714	ENSG00000226864	rs10887024	ATE1-AS1	-2.60581	0.271644	8.57775e-22	0.697782	transcribed_unitary_pseudogene	TRUE	ATE1-AS1
chr10	cg06241170	ENSG00000166033	rs4752700	HTRA1	-127.311	25.9422	9.22537e-07	0.694771	protein_coding	TRUE	HTRA1
chr10	cg19917656	ENSG00000065621	rs641071	GSTO2	-9.93904	1.76427	1.7657e-08	0.682964	protein_coding	TRUE	GSTO2
chr10	cg03417454	ENSG00000226864	rs10887024	ATE1-AS1	-1.81824	0.181998	1.67758e-23	0.654006	transcribed_unitary_pseudogene	TRUE	ATE1-AS1
chr10	cg15331834	ENSG00000224812	rs11389811	TMEM72-AS1	4.15187	0.80179	2.2398e-07	0.638634	antisense	TRUE	TMEM72-AS1
chr10	cg05552874	ENSG00000185745	rs74945792	IFIT1	-10.6883	1.44756	1.53977e-13	0.58137	protein_coding	TRUE	IFIT1
chr10	cg19225512	ENSG00000166228	rs2630336	PCBD1	4.29474	0.865644	7.00158e-07	0.569388	protein_coding	TRUE	PCBD1
chr10	cg21324555	ENSG00000166228	rs2630336	PCBD1	3.03479	0.581718	1.81897e-07	0.550167	protein_coding	TRUE	PCBD1
chr10	cg07409741	ENSG00000166228	rs2854613	PCBD1	-4.87763	0.831444	4.45191e-09	0.529319	protein_coding	TRUE	PCBD1
chr10	cg13133883	ENSG00000148604	rs6585849	RGR	-295.847	57.1587	2.2683e-07	0.492989	protein_coding	TRUE	RGR
chr10	cg10160939	ENSG00000224812	rs10736832	TMEM72-AS1	2.85225	0.562803	4.02163e-07	0.468014	antisense	TRUE	TMEM72-AS1
chr10	cg02693002	ENSG00000065154	rs4144117	OAT	-25.9322	5.02155	2.41493e-07	0.437636	protein_coding	TRUE	OAT
chr10	cg27030141	ENSG00000226864	rs10887024	ATE1-AS1	-0.935558	0.0841142	9.75269e-29	0.404954	transcribed_unitary_pseudogene	TRUE	ATE1-AS1
chr10	cg15019617	ENSG00000185745	rs303216	IFIT1	-14.5091	2.04803	1.39648e-12	0.330574	protein_coding	TRUE	IFIT1
chr10	cg24165102	ENSG00000107854	rs2066275	TNKS2	-22.0846	3.91951	1.75526e-08	0.293111	protein_coding	TRUE	TNKS2
chr10	cg07544152	ENSG00000148482	rs28482234	SLC39A12	-15.1886	2.8518	1.0041e-07	0.224629	protein_coding	TRUE	SLC39A12
chr10	cg12723985	ENSG00000120594	rs16919374	PLXDC2	-115.127	14.8206	7.97093e-15	0.158656	protein_coding	TRUE	PLXDC2
chr10	cg14024017	ENSG00000120594	rs16919374	PLXDC2	-106.205	13.1267	5.92674e-16	0.0940008	protein_coding	TRUE	PLXDC2
chr10	cg03417454	ENSG00000107669	rs10887024	ATE1	3.97527	0.723558	3.92797e-08	0.0892076	protein_coding	TRUE	ATE1
chr10	cg27030141	ENSG00000107669	rs10887024	ATE1	2.04543	0.361259	1.49662e-08	0.0686047	protein_coding	TRUE	ATE1
chr10	cg03898108	ENSG00000120594	rs7908024	PLXDC2	-128.363	17.1952	8.32596e-14	0.0621245	protein_coding	TRUE	PLXDC2
chr10	cg11364714	ENSG00000107669	rs10887024	ATE1	5.69715	1.05015	5.79347e-08	0.053643	protein_coding	TRUE	ATE1
chr11	cg26138821	ENSG00000280367	rs3824897	RP11-121L10.2	-1.56602	0.174355	2.66451e-19	0.996871	TEC	TRUE	RP11-121L10.2
chr11	cg26834418	ENSG00000280367	rs3824897	RP11-121L10.2	-1.15828	0.121706	1.78188e-21	0.980712	TEC	TRUE	RP11-121L10.2
chr11	cg22332266	ENSG00000280367	rs3824897	RP11-121L10.2	-1.13579	0.122795	2.25648e-20	0.975432	TEC	TRUE	RP11-121L10.2
chr11	cg05067963	ENSG00000280367	rs3824897	RP11-121L10.2	-1.17235	0.123117	1.69415e-21	0.974213	TEC	TRUE	RP11-121L10.2
chr11	cg18265608	ENSG00000110455	rs2074038	ACCS	-8.00939	0.798748	1.1548e-23	0.938365	protein_coding	TRUE	ACCS
chr11	cg26028595	ENSG00000280367	rs3824897	RP11-121L10.2	-3.68184	0.465757	2.67775e-15	0.937478	TEC	TRUE	RP11-121L10.2
chr11	cg04351018	ENSG00000280367	rs3824897	RP11-121L10.2	-2.04535	0.249416	2.39279e-16	0.920031	TEC	TRUE	RP11-121L10.2
chr11	cg09612920	ENSG00000023171	rs2846310	GRAMD1B	-192.109	36.9505	2.00275e-07	0.900727	protein_coding	TRUE	GRAMD1B
chr11	cg02232751	ENSG00000166796	rs11605386	LDHC	-3.78923	0.543469	3.11789e-12	0.854691	protein_coding	TRUE	LDHC
chr11	cg15894661	ENSG00000110455	rs2074038	ACCS	-9.74621	0.998706	1.69087e-22	0.768395	protein_coding	TRUE	ACCS
chr11	cg07112634	ENSG00000133316	rs200865978	WDR74	2.41951	0.483204	5.522e-07	0.758788	protein_coding	TRUE	WDR74
chr11	cg09339476	ENSG00000110455	rs2074038	ACCS	-5.67811	0.466863	4.93792e-34	0.755263	protein_coding	TRUE	ACCS
chr11	cg19038246	ENSG00000023171	rs4936820	GRAMD1B	-99.2886	20.0416	7.26577e-07	0.656753	protein_coding	TRUE	GRAMD1B
chr11	cg21871670	ENSG00000167987	rs614872	VPS37C	124.799	24.0116	2.02055e-07	0.648465	protein_coding	TRUE	VPS37C
chr11	cg20584555	ENSG00000167995	rs2668899	BEST1	-9.48342	0.881903	5.71439e-27	0.648351	protein_coding	TRUE	BEST1
chr11	cg23584647	ENSG00000167995	rs2736595	BEST1	-39.1954	5.17895	3.78395e-14	0.631627	protein_coding	TRUE	BEST1
chr11	cg22892043	ENSG00000167995	rs2524294	BEST1	-42.8016	8.46449	4.26764e-07	0.62301	protein_coding	TRUE	BEST1
chr11	cg12728690	ENSG00000023171	rs2846310	GRAMD1B	-127.981	25.0388	3.19935e-07	0.59576	protein_coding	TRUE	GRAMD1B
chr11	cg24961445	ENSG00000023171	rs17127435	GRAMD1B	-144.313	28.5847	4.45023e-07	0.595681	protein_coding	TRUE	GRAMD1B
chr11	cg05861348	ENSG00000165905	rs56148819	LARGE2	-2.97022	0.527848	1.8333e-08	0.572628	protein_coding	TRUE	LARGE2
chr11	cg13555772	ENSG00000177042	rs7945422	TMEM80	-12.3783	2.3306	1.08895e-07	0.568635	protein_coding	TRUE	TMEM80
chr11	cg14167139	ENSG00000178202	rs74822968	KDELC2	-8.12552	0.820328	3.95115e-23	0.557809	protein_coding	TRUE	KDELC2
chr11	cg11562596	ENSG00000167995	rs2524294	BEST1	-8.14462	0.757647	5.9333e-27	0.539837	protein_coding	TRUE	BEST1
chr11	cg18164926	ENSG00000133316	rs472539	WDR74	2.9538	0.595726	7.11049e-07	0.533541	protein_coding	TRUE	WDR74
chr11	cg25948180	ENSG00000149089	rs57257751	APIP	-24.5775	4.57311	7.68625e-08	0.526005	protein_coding	TRUE	APIP
chr11	cg05481452	ENSG00000167995	rs2668899	BEST1	-10.1167	0.982201	7.04167e-25	0.523218	protein_coding	TRUE	BEST1
chr11	cg27205649	ENSG00000137513	rs10736814	NARS2	8.76608	1.43752	1.0737e-09	0.508958	protein_coding	TRUE	NARS2
chr11	cg26621248	ENSG00000177697	rs28648546	CD151	-16.4423	3.10915	1.23411e-07	0.441048	protein_coding	TRUE	CD151
chr11	cg02333667	ENSG00000149089	rs57257751	APIP	-29.0542	5.86194	7.18027e-07	0.43731	protein_coding	TRUE	APIP
chr11	cg07219264	ENSG00000197580	rs360712	BCO2	54.5145	7.61093	7.91244e-13	0.432593	protein_coding	TRUE	BCO2
chr11	cg03818576	ENSG00000148948	rs998447	LRRC4C	-24.8698	3.29119	4.14154e-14	0.425196	protein_coding	TRUE	LRRC4C
chr11	cg12316258	ENSG00000162194	rs113222038	LBHD1	54.0284	8.14703	3.31918e-11	0.415966	protein_coding	TRUE	LBHD1
chr11	cg23350132	ENSG00000110514	rs10501320	MADD	-98.2178	17.1636	1.05005e-08	0.368961	protein_coding	TRUE	MADD
chr11	cg00115288	ENSG00000177042	rs7945422	TMEM80	-8.71614	1.47098	3.11541e-09	0.359267	protein_coding	TRUE	TMEM80
chr11	cg12841566	ENSG00000110514	rs10501320	MADD	-65.8257	10.8151	1.15443e-09	0.357349	protein_coding	TRUE	MADD
chr11	cg13709043	ENSG00000023171	rs4936820	GRAMD1B	-84.1549	16.7526	5.07652e-07	0.353694	protein_coding	TRUE	GRAMD1B
chr11	cg19792802	ENSG00000172803	rs17854357	SNX32	5.29187	0.823028	1.27811e-10	0.319382	protein_coding	TRUE	SNX32
chr11	cg24508095	ENSG00000177697	rs6597977	CD151	-21.3703	3.90225	4.3404e-08	0.30005	protein_coding	TRUE	CD151
chr11	cg16555856	ENSG00000173825	rs77130160	TIGD3	-0.64913	0.110552	4.31253e-09	0.297964	protein_coding	TRUE	TIGD3
chr11	cg11566244	ENSG00000167792	rs12794995	NDUFV1	-28.7698	5.84436	8.53809e-07	0.29204	protein_coding	TRUE	NDUFV1
chr11	cg00452199	ENSG00000110455	rs2074038	ACCS	-4.7659	0.366688	1.26962e-38	0.28666	protein_coding	TRUE	ACCS
chr11	cg20362170	ENSG00000184224	rs12794995	C11orf72	-0.581729	0.0815437	9.75275e-13	0.256184	lincRNA	TRUE	C11orf72
chr11	cg15456821	ENSG00000167995	rs2727272	BEST1	-19.629	2.36873	1.16419e-16	0.233915	protein_coding	TRUE	BEST1
chr11	cg24204282	ENSG00000165905	rs56148819	LARGE2	-3.01905	0.557604	6.15225e-08	0.20814	protein_coding	TRUE	LARGE2
chr11	cg12316258	ENSG00000278615	rs113222038	C11orf98	15.2957	2.45734	4.83065e-10	0.206099	protein_coding	TRUE	C11orf98
chr11	cg16423756	ENSG00000154127	rs7129071	UBASH3B	8.82839	1.6284	5.91011e-08	0.174462	protein_coding	TRUE	UBASH3B
chr11	cg27221977	ENSG00000110514	rs10501320	MADD	-115.792	22.6711	3.26507e-07	0.159741	protein_coding	TRUE	MADD
chr11	cg01743873	ENSG00000177697	rs28478991	CD151	-6.40588	0.779302	2.03457e-16	0.156771	protein_coding	TRUE	CD151
chr11	cg20362170	ENSG00000255119	rs12794995	RP11-655M14.12	-6.04118	0.694255	3.27018e-18	0.156445	antisense	TRUE	RP11-655M14.12
chr11	cg05115468	ENSG00000133316	rs17157578	WDR74	3.23198	0.651313	6.96779e-07	0.149247	protein_coding	TRUE	WDR74
chr11	cg14135214	ENSG00000177042	rs7945422	TMEM80	-6.30939	1.00546	3.49356e-10	0.125831	protein_coding	TRUE	TMEM80
chr11	cg26145333	ENSG00000256269	rs17075	HMBS	-47.9253	9.36462	3.09298e-07	0.119246	protein_coding	TRUE	HMBS
chr11	cg04074835	ENSG00000110455	rs2074038	ACCS	-8.36717	0.770174	1.71093e-27	0.118148	protein_coding	TRUE	ACCS
chr11	cg20362170	ENSG00000167792	rs12794995	NDUFV1	-12.4825	2.23793	2.4371e-08	0.114997	protein_coding	TRUE	NDUFV1
chr11	cg03603279	ENSG00000167792	rs12794995	NDUFV1	-30.7996	6.05424	3.63243e-07	0.109821	protein_coding	TRUE	NDUFV1
chr11	cg20240860	ENSG00000110455	rs2074038	ACCS	-6.00245	0.473837	8.92496e-37	0.107555	protein_coding	TRUE	ACCS
chr11	cg16963683	ENSG00000110455	rs2074038	ACCS	-7.31219	0.739873	4.93152e-23	0.0999541	protein_coding	TRUE	ACCS
chr11	cg11367048	ENSG00000256269	rs17075	HMBS	-12.4584	1.39469	4.15777e-19	0.0865885	protein_coding	TRUE	HMBS
chr11	cg12867237	ENSG00000110455	rs2074038	ACCS	-6.21808	0.65854	3.64938e-21	0.0784634	protein_coding	TRUE	ACCS
chr11	cg10449041	ENSG00000162194	rs35210758	LBHD1	-38.691	5.03151	1.47438e-14	0.0685435	protein_coding	TRUE	LBHD1
chr11	cg10449041	ENSG00000278615	rs35210758	C11orf98	-10.1451	1.53317	3.66426e-11	0.0668957	protein_coding	TRUE	C11orf98
chr11	cg01489981	ENSG00000166796	rs3740714	LDHC	-5.63757	0.916593	7.72023e-10	0.0643596	protein_coding	TRUE	LDHC
chr11	cg04813074	ENSG00000133316	rs200865978	WDR74	2.0721	0.387346	8.82098e-08	0.0559075	protein_coding	TRUE	WDR74
chr12	cg26392922	ENSG00000139725	rs712852	RHOF	-2.03756	0.332747	9.15733e-10	0.984885	protein_coding	TRUE	RHOF
chr12	cg06532071	ENSG00000256576	rs7307636	RP13-977J11.2	-0.965926	0.0992553	2.20792e-22	0.785307	lincRNA	TRUE	RP13-977J11.2
chr12	cg14949892	ENSG00000072609	rs74721187	CHFR	6.80498	1.30061	1.67545e-07	0.776809	protein_coding	TRUE	CHFR
chr12	cg06735598	ENSG00000168778	rs4930708	TCTN2	-25.9718	3.54928	2.52652e-13	0.752079	protein_coding	TRUE	TCTN2
chr12	cg27467734	ENSG00000182544	rs56297209	MFSD5	10.0102	1.51714	4.16469e-11	0.710583	protein_coding	TRUE	MFSD5
chr12	cg05954233	ENSG00000111786	rs680795	SRSF9	-28.7571	4.83118	2.64267e-09	0.707155	protein_coding	TRUE	SRSF9
chr12	cg04906455	ENSG00000253719	rs3832833	ATXN7L3B	-186.85	30.3861	7.78811e-10	0.640212	protein_coding	TRUE	ATXN7L3B
chr12	cg16300310	ENSG00000090615	rs957800	GOLGA3	-113.14	22.1914	3.42546e-07	0.635815	protein_coding	TRUE	GOLGA3
chr12	cg17560472	ENSG00000174718	rs12370315	KIAA1551	2.66912	0.440477	1.3645e-09	0.578398	protein_coding	TRUE	KIAA1551
chr12	cg01097940	ENSG00000010626	rs7138740	LRRC23	38.2464	3.87396	5.46845e-23	0.569195	protein_coding	TRUE	LRRC23
chr12	cg23932063	ENSG00000182993	rs2075268	C12orf60	-4.92643	0.526293	7.92685e-21	0.493047	protein_coding	TRUE	C12orf60
chr12	cg23521905	ENSG00000279500	rs4760537	RP11-21K12.2	-1.587	0.32245	8.58036e-07	0.487185	TEC	TRUE	RP11-21K12.2
chr12	cg03209332	ENSG00000256576	rs7298968	RP13-977J11.2	3.10011	0.48812	2.13769e-10	0.440075	lincRNA	TRUE	RP13-977J11.2
chr12	cg21171335	ENSG00000158023	rs11043242	WDR66	-3.97789	0.385809	6.31663e-25	0.419837	protein_coding	TRUE	WDR66
chr12	cg22134853	ENSG00000060138	rs11053915	YBX3	-270.122	51.1814	1.30786e-07	0.281815	protein_coding	TRUE	YBX3
chr12	cg20594304	ENSG00000111252	rs11065898	SH2B3	-7.46112	0.952746	4.83345e-15	0.107675	protein_coding	TRUE	SH2B3
chr12	cg14760880	ENSG00000111252	rs11065898	SH2B3	-15.0639	1.98774	3.49783e-14	0.10366	protein_coding	TRUE	SH2B3
chr12	cg27362255	ENSG00000176915	rs77178508	ANKLE2	37.1648	7.21649	2.60508e-07	0.101334	protein_coding	TRUE	ANKLE2
chr12	cg03538318	ENSG00000072609	rs55706161	CHFR	5.50737	0.968393	1.29194e-08	0.0795175	protein_coding	TRUE	CHFR
chr13	cg15988970	ENSG00000120675	rs17553284	DNAJC15	-4.25599	0.313908	7.09414e-42	0.869018	protein_coding	TRUE	DNAJC15
chr13	cg09677945	ENSG00000120675	rs17553284	DNAJC15	-5.31922	0.403187	9.6339e-40	0.859858	protein_coding	TRUE	DNAJC15
chr13	cg14729962	ENSG00000120675	rs17553284	DNAJC15	-6.53098	0.487282	5.81758e-41	0.849411	protein_coding	TRUE	DNAJC15
chr13	cg19598875	ENSG00000125247	rs9518129	TMTC4	-11.7635	2.18301	7.09851e-08	0.777502	protein_coding	TRUE	TMTC4
chr13	cg00191181	ENSG00000136141	rs1326110	LRCH1	-10.6511	1.35322	3.52114e-15	0.725055	protein_coding	TRUE	LRCH1
chr13	cg20399252	ENSG00000123179	rs7983905	EBPL	-3.16034	0.605383	1.78541e-07	0.722985	protein_coding	TRUE	EBPL
chr13	cg06650250	ENSG00000136141	rs1326110	LRCH1	-13.2519	2.15608	7.93184e-10	0.628373	protein_coding	TRUE	LRCH1
chr13	cg17351439	ENSG00000183098	rs5805796	GPC6	-12.5754	1.75503	7.76088e-13	0.625053	protein_coding	TRUE	GPC6
chr13	cg08005604	ENSG00000136141	rs28489097	LRCH1	-7.64997	1.02431	8.11776e-14	0.567808	protein_coding	TRUE	LRCH1
chr13	cg02305431	ENSG00000132964	rs3834505	CDK8	-13.0127	2.16628	1.89066e-09	0.557456	protein_coding	TRUE	CDK8
chr13	cg22829304	ENSG00000120696	rs2039134	KBTBD7	3.98459	0.668982	2.58164e-09	0.509924	protein_coding	TRUE	KBTBD7
chr13	cg26544448	ENSG00000102547	rs4942830	CAB39L	-8.16733	1.66052	8.71945e-07	0.494389	protein_coding	TRUE	CAB39L
chr13	cg12201399	ENSG00000120675	rs2281777	DNAJC15	-19.0394	1.7627	3.3948e-27	0.339597	protein_coding	TRUE	DNAJC15
chr13	cg08520986	ENSG00000172915	rs7332116	NBEA	-46.205	9.28313	6.44756e-07	0.243296	protein_coding	TRUE	NBEA
chr13	cg03658251	ENSG00000123179	rs7983905	EBPL	-2.31911	0.341461	1.10791e-11	0.233637	protein_coding	TRUE	EBPL
chr13	cg07252602	ENSG00000235903	rs1087	CPB2-AS1	-3.90145	0.654105	2.45282e-09	0.103014	antisense	TRUE	CPB2-AS1
chr13	cg04663916	ENSG00000123179	rs7983905	EBPL	-1.76529	0.257658	7.31796e-12	0.0779031	protein_coding	TRUE	EBPL
chr14	cg13105904	ENSG00000139899	rs2273632	CBLN3	-0.748471	0.145998	2.95061e-07	0.994641	protein_coding	TRUE	CBLN3
chr14	cg26349299	ENSG00000151748	rs12433935	SAV1	-16.8189	3.11282	6.54924e-08	0.955295	protein_coding	TRUE	SAV1
chr14	cg27312312	ENSG00000186615	rs10146870	KTN1-AS1	-1.88183	0.316322	2.69636e-09	0.906091	antisense	TRUE	KTN1-AS1
chr14	cg06114035	ENSG00000151838	rs8003052	CCDC175	-0.690117	0.0838254	1.82912e-16	0.866486	protein_coding	TRUE	CCDC175
chr14	cg01928351	ENSG00000245466	rs1572678	CTD-2540L5.6	-1.849	0.33532	3.50481e-08	0.845624	lincRNA	TRUE	CTD-2540L5.6
chr14	cg23685650	ENSG00000186615	rs10146870	KTN1-AS1	-1.09172	0.175313	4.74635e-10	0.837686	antisense	TRUE	KTN1-AS1
chr14	cg18135206	ENSG00000156381	rs2273905	ANKRD9	3.55973	0.571835	4.81235e-10	0.818209	protein_coding	TRUE	ANKRD9
chr14	cg01928351	ENSG00000133985	rs1572678	TTC9	-5.15936	0.958697	7.38087e-08	0.721895	protein_coding	TRUE	TTC9
chr14	cg11479689	ENSG00000100884	rs12888763	CPNE6	4.17964	0.829606	4.70162e-07	0.613986	protein_coding	TRUE	CPNE6
chr14	cg16091920	ENSG00000080823	rs1190596	MOK	-572.835	111.087	2.51416e-07	0.588309	protein_coding	TRUE	MOK
chr14	cg02190211	ENSG00000042088	rs942190	TDP1	-8.97841	1.67136	7.79024e-08	0.569701	protein_coding	TRUE	TDP1
chr14	cg01811583	ENSG00000066629	rs11625037	EML1	-33.4504	6.35214	1.39432e-07	0.547568	protein_coding	TRUE	EML1
chr14	cg26180015	ENSG00000066629	rs11625037	EML1	-17.7103	3.09349	1.03424e-08	0.474729	protein_coding	TRUE	EML1
chr14	cg08669673	ENSG00000066629	rs11625037	EML1	-21.8654	4.05264	6.83871e-08	0.447352	protein_coding	TRUE	EML1
chr14	cg16194253	ENSG00000157379	rs45579332	DHRS1	-5.31033	0.735856	5.33317e-13	0.323252	protein_coding	TRUE	DHRS1
chr14	cg23112188	ENSG00000100884	rs12888763	CPNE6	4.71855	0.877897	7.66522e-08	0.267415	protein_coding	TRUE	CPNE6
chr14	cg02940042	ENSG00000182512	rs6575521	GLRX5	-4.32931	0.789937	4.23955e-08	0.24948	protein_coding	TRUE	GLRX5
chr14	cg13725826	ENSG00000066629	rs11625037	EML1	-21.7071	4.24061	3.07379e-07	0.22636	protein_coding	TRUE	EML1
chr14	cg22775413	ENSG00000100884	rs11847138	CPNE6	5.45518	1.05245	2.17976e-07	0.171092	protein_coding	TRUE	CPNE6
chr14	cg12699619	ENSG00000157379	rs11158632	DHRS1	9.61958	1.68416	1.11786e-08	0.168087	protein_coding	TRUE	DHRS1
chr14	cg02467435	ENSG00000151838	rs8003052	CCDC175	-1.24183	0.166281	8.12799e-14	0.165376	protein_coding	TRUE	CCDC175
chr14	cg23494015	ENSG00000151838	rs8003052	CCDC175	-1.4617	0.20663	1.50529e-12	0.154575	protein_coding	TRUE	CCDC175
chr14	cg00524400	ENSG00000100884	rs3561	CPNE6	4.21849	0.765523	3.57628e-08	0.145537	protein_coding	TRUE	CPNE6
chr14	cg09119665	ENSG00000176903	rs4903144	PNMA1	-109.568	20.7936	1.36923e-07	0.104094	protein_coding	TRUE	PNMA1
chr14	cg07922154	ENSG00000081181	rs6573787	ARG2	-13.2279	2.40707	3.89701e-08	0.092953	protein_coding	TRUE	ARG2
chr14	cg14428252	ENSG00000151838	rs6573272	CCDC175	-1.31007	0.223203	4.37289e-09	0.0929189	protein_coding	TRUE	CCDC175
chr14	cg13506670	ENSG00000186615	rs10146870	KTN1-AS1	-0.518085	0.0747186	4.09636e-12	0.0732951	antisense	TRUE	KTN1-AS1
chr15	cg18010014	ENSG00000140450	rs12440256	ARRDC4	-4.90628	0.544615	2.08486e-19	0.813092	protein_coding	TRUE	ARRDC4
chr15	cg14110457	ENSG00000171914	rs2439718	TLN2	-40.6455	6.91845	4.22977e-09	0.777272	protein_coding	TRUE	TLN2
chr15	cg19188572	ENSG00000140307	rs8041394	GTF2A2	6.83938	0.836137	2.84474e-16	0.756126	protein_coding	TRUE	GTF2A2
chr15	cg16992257	ENSG00000090487	rs112533612	SPG21	-5.15231	1.00821	3.21531e-07	0.711066	protein_coding	TRUE	SPG21
chr15	cg01956614	ENSG00000171914	rs2439718	TLN2	-47.6967	9.07648	1.48041e-07	0.547447	protein_coding	TRUE	TLN2
chr15	cg14979946	ENSG00000104064	rs11323034	GABPB1	6.89395	1.26606	5.17464e-08	0.544164	protein_coding	TRUE	GABPB1
chr15	cg26710563	ENSG00000171914	rs56083775	TLN2	-39.5754	5.8528	1.36303e-11	0.514534	protein_coding	TRUE	TLN2
chr15	cg10620100	ENSG00000128928	rs146167647	IVD	-22.1014	3.44787	1.45376e-10	0.333487	protein_coding	TRUE	IVD
chr15	cg02606218	ENSG00000156958	rs17435932	GALK2	-1.61584	0.313061	2.45094e-07	0.331513	protein_coding	TRUE	GALK2
chr15	cg23645969	ENSG00000140323	rs12902102	DISP2	-12.7414	1.73463	2.05242e-13	0.205881	protein_coding	TRUE	DISP2
chr15	cg09159619	ENSG00000248508	rs8041057	SRP14-AS1	11.8326	2.27811	2.05758e-07	0.18215	lincRNA	TRUE	SRP14-AS1
chr15	cg02198044	ENSG00000069869	rs4144243	NEDD4	5.90975	0.924802	1.65578e-10	0.124684	protein_coding	TRUE	NEDD4
chr15	cg14979946	ENSG00000244879	rs11323034	GABPB1-AS1	146.311	18.9345	1.09922e-14	0.122566	antisense	TRUE	GABPB1-AS1
chr15	cg07611606	ENSG00000278600	rs2903105	RP11-81A1.6	-6.74393	1.28911	1.68161e-07	0.116363	sense_intronic	TRUE	RP11-81A1.6
chr15	cg00225070	ENSG00000278600	rs5813998	RP11-81A1.6	-6.18082	1.13419	5.05023e-08	0.115263	sense_intronic	TRUE	RP11-81A1.6
chr15	cg00185634	ENSG00000140323	rs12902102	DISP2	22.5764	3.96948	1.28922e-08	0.0729352	protein_coding	TRUE	DISP2
chr15	cg21165061	ENSG00000140323	rs12902102	DISP2	-10.6062	1.70963	5.51073e-10	0.0618327	protein_coding	TRUE	DISP2
chr15	cg23855392	ENSG00000278600	rs34375570	RP11-81A1.6	-2.45991	0.441697	2.55878e-08	0.0523728	sense_intronic	TRUE	RP11-81A1.6
chr16	cg04793813	ENSG00000169715	rs1610215	MT1E	-6.12182	1.10613	3.12195e-08	0.983178	protein_coding	TRUE	MT1E
chr16	cg20083730	ENSG00000169715	rs1610215	MT1E	-5.1739	0.931942	2.82843e-08	0.924378	protein_coding	TRUE	MT1E
chr16	cg24235633	ENSG00000214725	rs747973	CDIPT-AS1	-1.85766	0.178429	2.20352e-25	0.861702	transcribed_unitary_pseudogene	TRUE	CDIPT-AS1
chr16	cg04287289	ENSG00000204991	rs2376879	SPIRE2	1.05382	0.205152	2.7947e-07	0.849351	protein_coding	TRUE	SPIRE2
chr16	cg02512505	ENSG00000169715	rs1610215	MT1E	-3.57067	0.676393	1.29901e-07	0.822796	protein_coding	TRUE	MT1E
chr16	cg02575675	ENSG00000214725	rs747973	CDIPT-AS1	-1.49078	0.138857	6.89238e-27	0.796578	transcribed_unitary_pseudogene	TRUE	CDIPT-AS1
chr16	cg00519002	ENSG00000169715	rs1610215	MT1E	-4.74896	0.963603	8.29335e-07	0.718404	protein_coding	TRUE	MT1E
chr16	cg06463589	ENSG00000169715	rs1610215	MT1E	-7.53405	1.52032	7.21134e-07	0.710041	protein_coding	TRUE	MT1E
chr16	cg16018533	ENSG00000103202	rs7190051	NME4	-5.01519	0.800482	3.72313e-10	0.68684	protein_coding	TRUE	NME4
chr16	cg01827781	ENSG00000214725	rs747973	CDIPT-AS1	-2.24313	0.213682	8.86999e-26	0.646832	transcribed_unitary_pseudogene	TRUE	CDIPT-AS1
chr16	cg05895034	ENSG00000172460	rs17659759	PRSS30P	-1.92404	0.340733	1.63494e-08	0.640897	unitary_pseudogene	TRUE	PRSS30P
chr16	cg05490519	ENSG00000172460	rs17659759	PRSS30P	-1.83961	0.325947	1.66256e-08	0.628687	unitary_pseudogene	TRUE	PRSS30P
chr16	cg15689738	ENSG00000186187	rs13337167	ZNRF1	-3.57272	0.615511	6.45651e-09	0.619047	protein_coding	TRUE	ZNRF1
chr16	cg05743734	ENSG00000169715	rs1610215	MT1E	-5.05293	0.885298	1.14582e-08	0.618138	protein_coding	TRUE	MT1E
chr16	cg24474561	ENSG00000214725	rs747973	CDIPT-AS1	-4.64976	0.726393	1.54199e-10	0.562521	transcribed_unitary_pseudogene	TRUE	CDIPT-AS1
chr16	cg09745688	ENSG00000172460	rs17659759	PRSS30P	-1.66757	0.291496	1.06063e-08	0.559054	unitary_pseudogene	TRUE	PRSS30P
chr16	cg24496523	ENSG00000263072	rs1053871	ZNF213-AS1	4.70508	0.693016	1.1269e-11	0.555385	antisense	TRUE	ZNF213-AS1
chr16	cg06710853	ENSG00000261332	rs1557672	RP11-297C4.1	-0.86193	0.110798	7.29469e-15	0.414107	antisense	TRUE	RP11-297C4.1
chr16	cg22191015	ENSG00000214725	rs747973	CDIPT-AS1	-6.73387	1.16559	7.59372e-09	0.408786	transcribed_unitary_pseudogene	TRUE	CDIPT-AS1
chr16	cg02684344	ENSG00000263072	rs1053871	ZNF213-AS1	6.81827	1.21283	1.88972e-08	0.369052	antisense	TRUE	ZNF213-AS1
chr16	cg13552869	ENSG00000214725	rs889695	CDIPT-AS1	11.1138	2.23119	6.32169e-07	0.351655	transcribed_unitary_pseudogene	TRUE	CDIPT-AS1
chr16	cg13320631	ENSG00000263072	rs1053871	ZNF213-AS1	5.0043	0.791997	2.6398e-10	0.302612	antisense	TRUE	ZNF213-AS1
chr16	cg26513180	ENSG00000204991	rs7186980	SPIRE2	0.955286	0.184471	2.23645e-07	0.258113	protein_coding	TRUE	SPIRE2
chr16	cg03082108	ENSG00000234719	rs2869492	RP11-166B2.1	-20.876	2.68503	7.54617e-15	0.230169	protein_coding	TRUE	RP11-166B2.1
chr16	cg13768545	ENSG00000103202	rs4984666	NME4	-4.30954	0.61152	1.82486e-12	0.201926	protein_coding	TRUE	NME4
chr16	cg03615426	ENSG00000103550	rs56747844	KNOP1	65.0219	10.3144	2.90044e-10	0.180711	protein_coding	TRUE	KNOP1
chr16	cg01758899	ENSG00000166548	rs13331952	TK2	-5.11853	1.04361	9.35959e-07	0.136353	protein_coding	TRUE	TK2
chr16	cg05335886	ENSG00000006007	rs6497357	GDE1	7.15762	1.251	1.05586e-08	0.0796577	protein_coding	TRUE	GDE1
chr17	cg12742669	ENSG00000108679	rs3785529	LGALS3BP	-19.91	3.73792	1.00132e-07	0.96825	protein_coding	TRUE	LGALS3BP
chr17	cg12432006	ENSG00000133193	rs11544800	FAM104A	-5.27863	0.591357	4.40482e-19	0.957647	protein_coding	TRUE	FAM104A
chr17	cg21927395	ENSG00000141219	rs34739154	C17orf80	43.8005	7.82325	2.15887e-08	0.931087	protein_coding	TRUE	C17orf80
chr17	cg11442173	ENSG00000008283	rs2286569	CYB561	-6.27056	1.01547	6.61555e-10	0.891036	protein_coding	TRUE	CYB561
chr17	cg00034650	ENSG00000108679	rs3785529	LGALS3BP	-15.1942	2.67653	1.37209e-08	0.819808	protein_coding	TRUE	LGALS3BP
chr17	cg24321297	ENSG00000070731	rs16967307	ST6GALNAC2	-52.1803	6.35214	2.12883e-16	0.811906	protein_coding	TRUE	ST6GALNAC2
chr17	cg26576875	ENSG00000133193	rs1052706	FAM104A	-3.44167	0.411659	6.24588e-17	0.796984	protein_coding	TRUE	FAM104A
chr17	cg16905754	ENSG00000267543	rs4346230	RP11-666A8.7	49.1884	9.96093	7.8874e-07	0.785898	sense_intronic	TRUE	RP11-666A8.7
chr17	cg05817667	ENSG00000261873	rs2036670	RP11-515E23.1	-17.8286	2.98766	2.41054e-09	0.763815	protein_coding	TRUE	RP11-515E23.1
chr17	cg14870271	ENSG00000108679	rs3785529	LGALS3BP	-16.1884	3.059	1.20952e-07	0.740137	protein_coding	TRUE	LGALS3BP
chr17	cg20503109	ENSG00000070731	rs16967307	ST6GALNAC2	-80.8372	14.2364	1.3611e-08	0.734965	protein_coding	TRUE	ST6GALNAC2
chr17	cg16584676	ENSG00000159202	rs999474	UBE2Z	16.3269	2.3179	1.86992e-12	0.723885	protein_coding	TRUE	UBE2Z
chr17	cg14243899	ENSG00000070731	rs16967307	ST6GALNAC2	-24.2425	2.69477	2.33787e-19	0.707985	protein_coding	TRUE	ST6GALNAC2
chr17	cg19439071	ENSG00000070731	rs34207189	ST6GALNAC2	-62.1559	9.9291	3.85061e-10	0.69729	protein_coding	TRUE	ST6GALNAC2
chr17	cg22109370	ENSG00000167280	rs56200816	ENGASE	13.8846	2.82458	8.85022e-07	0.643372	protein_coding	TRUE	ENGASE
chr17	cg11202345	ENSG00000108679	rs3785529	LGALS3BP	-16.9763	3.37504	4.90606e-07	0.614009	protein_coding	TRUE	LGALS3BP
chr17	cg12673151	ENSG00000178852	rs118099962	EFCAB13	-1.17146	0.193967	1.54608e-09	0.540532	protein_coding	TRUE	EFCAB13
chr17	cg13664588	ENSG00000070731	rs34207189	ST6GALNAC2	-84.5266	13.2768	1.93418e-10	0.521704	protein_coding	TRUE	ST6GALNAC2
chr17	cg24346909	ENSG00000141219	rs1466117	C17orf80	-38.4839	6.07322	2.34795e-10	0.52054	protein_coding	TRUE	C17orf80
chr17	cg16548154	ENSG00000070731	rs16967307	ST6GALNAC2	-60.8564	7.85504	9.37685e-15	0.500628	protein_coding	TRUE	ST6GALNAC2
chr17	cg10914865	ENSG00000262877	rs1701	RP11-1055B8.4	-28.8725	5.79029	6.15255e-07	0.47467	lincRNA	TRUE	RP11-1055B8.4
chr17	cg08106445	ENSG00000262877	rs1701	RP11-1055B8.4	-38.095	7.1796	1.12058e-07	0.438113	lincRNA	TRUE	RP11-1055B8.4
chr17	cg20207911	ENSG00000109047	rs17682036	RCVRN	1709.58	292.147	4.86357e-09	0.404489	protein_coding	TRUE	RCVRN
chr17	cg03396939	ENSG00000128487	rs12936794	SPECC1	2.42109	0.425834	1.3041e-08	0.3828	protein_coding	TRUE	SPECC1
chr17	cg26576875	ENSG00000141219	rs1052706	C17orf80	8.40517	0.824615	2.13439e-24	0.378399	protein_coding	TRUE	C17orf80
chr17	cg05778709	ENSG00000261873	rs1039768	RP11-515E23.1	21.5794	3.90612	3.30428e-08	0.355493	protein_coding	TRUE	RP11-515E23.1
chr17	cg21920539	ENSG00000186532	rs8065937	SMYD4	-1.28173	0.213968	2.09498e-09	0.329509	protein_coding	TRUE	SMYD4
chr17	cg12432006	ENSG00000141219	rs11544800	C17orf80	12.9726	1.14534	9.70572e-30	0.262535	protein_coding	TRUE	C17orf80
chr17	cg21504240	ENSG00000184185	rs66628279	KCNJ12	-5.22297	1.02369	3.35919e-07	0.2348	protein_coding	TRUE	KCNJ12
chr17	cg16905754	ENSG00000070731	rs34207189	ST6GALNAC2	-82.5109	16.3372	4.40705e-07	0.183928	protein_coding	TRUE	ST6GALNAC2
chr17	cg22579017	ENSG00000258472	rs2286519	RP11-192H23.4	-1.70462	0.288487	3.44534e-09	0.150778	protein_coding	TRUE	RP11-192H23.4
chr17	cg06726167	ENSG00000220205	rs8067606	VAMP2	148.184	22.0106	1.66894e-11	0.117633	protein_coding	TRUE	VAMP2
chr17	cg27546012	ENSG00000182534	rs9914041	MXRA7	-255.632	38.4552	2.98021e-11	0.088347	protein_coding	TRUE	MXRA7
chr17	cg00458337	ENSG00000264920	rs8079333	RP11-6N17.4	-3.78018	0.74399	3.75549e-07	0.0870042	processed_transcript	TRUE	RP11-6N17.4
chr17	cg22150270	ENSG00000267665	rs112637270	RP11-13K12.2	-23.461	4.56605	2.77466e-07	0.0847088	lincRNA	TRUE	RP11-13K12.2
chr17	cg27370759	ENSG00000258472	rs2286519	RP11-192H23.4	-1.4604	0.242115	1.62087e-09	0.0827378	protein_coding	TRUE	RP11-192H23.4
chr17	cg03928539	ENSG00000184185	rs7220315	KCNJ12	-3.95438	0.747257	1.21083e-07	0.0734026	protein_coding	TRUE	KCNJ12
chr17	cg11394644	ENSG00000141219	rs35855827	C17orf80	26.8111	2.37262	1.30867e-29	0.0730488	protein_coding	TRUE	C17orf80
chr17	cg12681669	ENSG00000258472	rs2286519	RP11-192H23.4	-1.43339	0.23492	1.05001e-09	0.0726755	protein_coding	TRUE	RP11-192H23.4
chr17	cg10281770	ENSG00000141580	rs9788998	WDR45B	-7.55043	1.3546	2.49047e-08	0.0717478	protein_coding	TRUE	WDR45B
chr17	cg20832875	ENSG00000182534	rs7212823	MXRA7	-96.5642	11.3313	1.56989e-17	0.0580889	protein_coding	TRUE	MXRA7
chr18	cg20479805	ENSG00000152234	rs35861434	ATP5A1	-112.141	20.7186	6.21208e-08	0.070945	protein_coding	TRUE	ATP5A1
chr18	cg00134212	ENSG00000176890	rs2853741	TYMS	-9.9508	1.64885	1.58968e-09	0.0689751	protein_coding	TRUE	TYMS
chr19	cg20439889	ENSG00000124302	rs111786665	CHST8	1.11893	0.176969	2.56962e-10	0.993314	protein_coding	TRUE	CHST8
chr19	cg24739326	ENSG00000124302	rs73029336	CHST8	1.78777	0.310981	8.98663e-09	0.970857	protein_coding	TRUE	CHST8
chr19	cg09231418	ENSG00000272333	rs77563037	KMT2B	3.89212	0.513744	3.56392e-14	0.968532	protein_coding	TRUE	KMT2B
chr19	cg02625404	ENSG00000124302	rs73029339	CHST8	-0.418873	0.0575432	3.35621e-13	0.947093	protein_coding	TRUE	CHST8
chr19	cg22200289	ENSG00000124302	rs73029336	CHST8	1.35426	0.217214	4.52797e-10	0.914437	protein_coding	TRUE	CHST8
chr19	cg21483110	ENSG00000124302	rs73029336	CHST8	-1.69722	0.253158	2.02545e-11	0.91362	protein_coding	TRUE	CHST8
chr19	cg13959523	ENSG00000124302	rs73029336	CHST8	0.978857	0.148163	3.93212e-11	0.897594	protein_coding	TRUE	CHST8
chr19	cg18823272	ENSG00000124302	rs73029336	CHST8	-0.332974	0.0450165	1.39608e-13	0.889207	protein_coding	TRUE	CHST8
chr19	cg02931271	ENSG00000161618	rs11457049	ALDH16A1	-1.2143	0.232585	1.78075e-07	0.868975	protein_coding	TRUE	ALDH16A1
chr19	cg18469665	ENSG00000173875	rs4804725	ZNF791	-39.4559	5.93039	2.86823e-11	0.866397	protein_coding	TRUE	ZNF791
chr19	cg27198485	ENSG00000124302	rs73029336	CHST8	1.20319	0.186916	1.21815e-10	0.856393	protein_coding	TRUE	CHST8
chr19	cg24270764	ENSG00000167646	rs3848619	DNAAF3	-0.977067	0.121939	1.12169e-15	0.855828	protein_coding	TRUE	DNAAF3
chr19	cg23999422	ENSG00000077463	rs4807546	SIRT6	0.504058	0.0987813	3.34726e-07	0.760393	protein_coding	TRUE	SIRT6
chr19	cg08639586	ENSG00000124302	rs73029336	CHST8	-1.52828	0.238264	1.41545e-10	0.709707	protein_coding	TRUE	CHST8
chr19	cg01287132	ENSG00000077463	rs4807546	SIRT6	0.334432	0.0611423	4.50745e-08	0.676415	protein_coding	TRUE	SIRT6
chr19	cg27482605	ENSG00000167646	rs3848619	DNAAF3	-0.534863	0.0734843	3.37318e-13	0.640564	protein_coding	TRUE	DNAAF3
chr19	cg25619184	ENSG00000174652	rs4804429	ZNF266	65.7253	10.2131	1.23179e-10	0.596796	protein_coding	TRUE	ZNF266
chr19	cg10358533	ENSG00000124302	rs73029336	CHST8	0.877041	0.132395	3.48656e-11	0.59432	protein_coding	TRUE	CHST8
chr19	cg00568177	ENSG00000233527	rs3108594	ZNF529-AS1	-0.356171	0.0720597	7.70385e-07	0.576781	antisense	TRUE	ZNF529-AS1
chr19	cg14516473	ENSG00000178078	rs3810368	STAP2	1.16443	0.1852	3.22773e-10	0.542057	protein_coding	TRUE	STAP2
chr19	cg18812944	ENSG00000267056	rs12459933	AC005336.4	2.88141	0.538572	8.79111e-08	0.537258	processed_pseudogene	TRUE	AC005336.4
chr19	cg07492962	ENSG00000077463	rs4807546	SIRT6	0.301401	0.0519429	6.53179e-09	0.525119	protein_coding	TRUE	SIRT6
chr19	cg09617135	ENSG00000077463	rs4807546	SIRT6	0.632808	0.112617	1.91923e-08	0.505234	protein_coding	TRUE	SIRT6
chr19	cg10863458	ENSG00000105483	rs12984612	CARD8	-11.9815	1.65339	4.27353e-13	0.469529	protein_coding	TRUE	CARD8
chr19	cg16635176	ENSG00000130803	rs6511889	ZNF317	-3.21471	0.638369	4.75811e-07	0.44805	protein_coding	TRUE	ZNF317
chr19	cg06668703	ENSG00000267454	rs2904016	ZNF582-AS1	3.05795	0.437399	2.72544e-12	0.443582	lincRNA	TRUE	ZNF582-AS1
chr19	cg18542377	ENSG00000077463	rs4807546	SIRT6	0.657847	0.113815	7.47093e-09	0.432148	protein_coding	TRUE	SIRT6
chr19	cg17896573	ENSG00000124302	rs73029339	CHST8	1.09797	0.1695	9.31249e-11	0.407602	protein_coding	TRUE	CHST8
chr19	cg15797933	ENSG00000204653	rs1726824	ASPDH	-2.81613	0.520271	6.20442e-08	0.396116	protein_coding	TRUE	ASPDH
chr19	cg02493364	ENSG00000272333	rs77563037	KMT2B	10.5017	1.57943	2.94947e-11	0.37797	protein_coding	TRUE	KMT2B
chr19	cg12103265	ENSG00000124302	rs73029336	CHST8	1.33124	0.209203	1.97312e-10	0.341239	protein_coding	TRUE	CHST8
chr19	cg25824543	ENSG00000105497	rs7245838	ZNF175	5.41509	1.08649	6.22721e-07	0.31779	protein_coding	TRUE	ZNF175
chr19	cg00397851	ENSG00000131845	rs3746226	ZNF304	-18.9015	3.75943	4.96236e-07	0.314181	protein_coding	TRUE	ZNF304
chr19	cg13185545	ENSG00000167646	rs3848619	DNAAF3	-1.85058	0.30465	1.24421e-09	0.295102	protein_coding	TRUE	DNAAF3
chr19	cg02380983	ENSG00000105507	rs138853548	CABP5	-468.552	83.0819	1.70398e-08	0.290291	protein_coding	TRUE	CABP5
chr19	cg13877915	ENSG00000131849	rs7259841	ZNF132	-1.1137	0.133772	8.40459e-17	0.272286	protein_coding	TRUE	ZNF132
chr19	cg12018403	ENSG00000167646	rs3848619	DNAAF3	-0.819748	0.0886129	2.22631e-20	0.258436	protein_coding	TRUE	DNAAF3
chr19	cg25360929	ENSG00000167646	rs3848619	DNAAF3	-1.18795	0.142307	6.95512e-17	0.247133	protein_coding	TRUE	DNAAF3
chr19	cg05558546	ENSG00000167646	rs3848619	DNAAF3	-3.76053	0.750371	5.39892e-07	0.191962	protein_coding	TRUE	DNAAF3
chr19	cg24539764	ENSG00000130332	rs3795039	LSM7	-8.83297	1.70683	2.27835e-07	0.18875	protein_coding	TRUE	LSM7
chr19	cg19636302	ENSG00000125741	rs58193759	OPA3	-9.73099	1.85791	1.62685e-07	0.138198	protein_coding	TRUE	OPA3
chr19	cg22824998	ENSG00000182013	rs3760833	PNMAL1	-44.579	6.81642	6.15401e-11	0.107065	protein_coding	TRUE	PNMAL1
chr19	cg21266559	ENSG00000124302	rs73029336	CHST8	0.833366	0.126559	4.55557e-11	0.0977402	protein_coding	TRUE	CHST8
chr19	cg04937172	ENSG00000105507	rs35439716	CABP5	-149.411	15.0418	2.98914e-23	0.0800795	protein_coding	TRUE	CABP5
chr19	cg05970437	ENSG00000129911	rs10411759	KLF16	13.881	2.22434	4.36119e-10	0.0572981	protein_coding	TRUE	KLF16
chr2	cg13324389	ENSG00000223658	rs13001285	C1GALT1C1L	-1.15023	0.190147	1.45615e-09	0.989433	protein_coding	TRUE	C1GALT1C1L
chr2	cg18817560	ENSG00000223658	rs13001285	C1GALT1C1L	-1.33522	0.246542	6.1016e-08	0.986714	protein_coding	TRUE	C1GALT1C1L
chr2	cg24674087	ENSG00000079785	rs73915402	DDX1	-44.7056	8.48755	1.3852e-07	0.985869	protein_coding	TRUE	DDX1
chr2	cg25276246	ENSG00000162878	rs4952398	PKDCC	-32.1367	6.10876	1.43463e-07	0.934667	protein_coding	TRUE	PKDCC
chr2	cg23410980	ENSG00000115486	rs7568458	GGCX	31.3434	6.0059	1.80126e-07	0.915993	protein_coding	TRUE	GGCX
chr2	cg07346182	ENSG00000136717	rs749008	BIN1	-70.3928	13.206	9.80271e-08	0.840841	protein_coding	TRUE	BIN1
chr2	cg14860182	ENSG00000144028	rs2276648	SNRNP200	124.576	16.2502	1.77229e-14	0.840172	protein_coding	TRUE	SNRNP200
chr2	cg02717117	ENSG00000162994	rs17046778	CLHC1	-4.65562	0.680068	7.60395e-12	0.796659	protein_coding	TRUE	CLHC1
chr2	cg14399236	ENSG00000158411	rs5832868	MITD1	-8.44976	1.53036	3.36246e-08	0.78825	protein_coding	TRUE	MITD1
chr2	cg24470804	ENSG00000135972	rs11326307	MRPS9	25.1595	3.82321	4.68171e-11	0.776924	protein_coding	TRUE	MRPS9
chr2	cg24977027	ENSG00000144115	rs6547757	THNSL2	-21.2712	2.24959	3.21163e-21	0.735413	protein_coding	TRUE	THNSL2
chr2	cg00327537	ENSG00000114978	rs1667601	MOB1A	-10.4413	1.77957	4.42864e-09	0.731229	protein_coding	TRUE	MOB1A
chr2	cg05027052	ENSG00000162994	rs17046778	CLHC1	-5.88686	0.830171	1.33014e-12	0.706836	protein_coding	TRUE	CLHC1
chr2	cg21542459	ENSG00000158411	rs5832868	MITD1	-2.44603	0.418452	5.05309e-09	0.704351	protein_coding	TRUE	MITD1
chr2	cg26648037	ENSG00000132305	rs35957458	IMMT	-20.2184	3.43613	4.00327e-09	0.70088	protein_coding	TRUE	IMMT
chr2	cg24812398	ENSG00000171853	rs7573231	TRAPPC12	-3.40368	0.566339	1.85564e-09	0.695546	protein_coding	TRUE	TRAPPC12
chr2	cg26336264	ENSG00000162994	rs17046778	CLHC1	-6.40278	0.857718	8.33599e-14	0.673976	protein_coding	TRUE	CLHC1
chr2	cg06091295	ENSG00000136717	rs749008	BIN1	-71.3378	12.4011	8.7922e-09	0.496573	protein_coding	TRUE	BIN1
chr2	cg12807937	ENSG00000130414	rs10153593	NDUFA10	-37.3242	5.42282	5.8691e-12	0.47275	protein_coding	TRUE	NDUFA10
chr2	cg03650730	ENSG00000115677	rs12624197	HDLBP	-21.764	3.57016	1.08706e-09	0.381251	protein_coding	TRUE	HDLBP
chr2	cg17186168	ENSG00000134324	rs56387825	LPIN1	43.2455	8.57495	4.57717e-07	0.37941	protein_coding	TRUE	LPIN1
chr2	cg08445696	ENSG00000170500	rs11895772	LONRF2	-77.6005	10.2741	4.25191e-14	0.324361	protein_coding	TRUE	LONRF2
chr2	cg08560184	ENSG00000136717	rs749008	BIN1	-60.412	10.2758	4.12562e-09	0.249597	protein_coding	TRUE	BIN1
chr2	cg13173536	ENSG00000171853	rs7573231	TRAPPC12	-2.75517	0.443634	5.28316e-10	0.24512	protein_coding	TRUE	TRAPPC12
chr2	cg15356281	ENSG00000006607	rs3755397	FARP2	2.78673	0.523597	1.02476e-07	0.245106	protein_coding	TRUE	FARP2
chr2	cg17257571	ENSG00000138376	rs1129804	BARD1	-11.1886	1.47103	2.82886e-14	0.225628	protein_coding	TRUE	BARD1
chr2	cg08541846	ENSG00000115350	rs12366	POLE4	11.4999	1.48516	9.6951e-15	0.18046	protein_coding	TRUE	POLE4
chr2	cg05991902	ENSG00000151693	rs34254156	ASAP2	-22.4504	4.48145	5.45325e-07	0.161988	protein_coding	TRUE	ASAP2
chr2	cg03728395	ENSG00000152291	rs10460587	TGOLN2	11.5964	2.08143	2.52767e-08	0.157605	protein_coding	TRUE	TGOLN2
chr2	cg05349725	ENSG00000144028	rs2276649	SNRNP200	-109.519	19.7752	3.05615e-08	0.154086	protein_coding	TRUE	SNRNP200
chr2	cg21399778	ENSG00000115685	rs2190656	PPP1R7	-3.92989	0.669585	4.38075e-09	0.150733	protein_coding	TRUE	PPP1R7
chr2	cg03650730	ENSG00000168385	rs12624197	SEPTIN2	34.999	6.34983	3.55198e-08	0.0930661	protein_coding	TRUE	SEPTIN2
chr2	cg20158317	ENSG00000173209	rs3821224	AHSA2	52.0143	8.56028	1.23036e-09	0.0681919	protein_coding	TRUE	AHSA2
chr2	cg10293909	ENSG00000115350	rs12366	POLE4	3.28136	0.380995	7.14265e-18	0.0550859	protein_coding	TRUE	POLE4
chr20	cg09328228	ENSG00000166913	rs6031848	YWHAB	-56.1099	10.2824	4.84603e-08	0.931892	protein_coding	TRUE	YWHAB
chr20	cg19579117	ENSG00000198646	rs6087602	NCOA6	25.8837	3.87889	2.50703e-11	0.839726	protein_coding	TRUE	NCOA6
chr20	cg14335121	ENSG00000064601	rs10639182	CTSA	-8.26058	1.52057	5.55487e-08	0.724277	protein_coding	TRUE	CTSA
chr20	cg17003395	ENSG00000089177	rs6105631	KIF16B	-5.93237	1.18854	5.99665e-07	0.416526	protein_coding	TRUE	KIF16B
chr20	cg13981425	ENSG00000100987	rs62215277	VSX1	-18.7156	2.89532	1.01917e-10	0.230626	protein_coding	TRUE	VSX1
chr20	cg05141856	ENSG00000089177	rs6044134	KIF16B	3.14143	0.49041	1.49663e-10	0.205127	protein_coding	TRUE	KIF16B
chr20	cg24467337	ENSG00000088305	rs6579030	DNMT3B	-5.48336	0.965006	1.32973e-08	0.189502	protein_coding	TRUE	DNMT3B
chr20	cg22541963	ENSG00000149679	rs2427323	CABLES2	15.8949	2.8282	1.90786e-08	0.181745	protein_coding	TRUE	CABLES2
chr20	cg22633769	ENSG00000149679	rs2427323	CABLES2	13.0906	2.00428	6.51987e-11	0.117715	protein_coding	TRUE	CABLES2
chr20	cg22356976	ENSG00000125814	rs6048743	NAPB	-148.961	27.3854	5.34501e-08	0.110902	protein_coding	TRUE	NAPB
chr21	cg12638745	ENSG00000157578	rs73367987	LCA5L	1.8629	0.307395	1.35898e-09	0.927432	protein_coding	TRUE	LCA5L
chr21	cg25492865	ENSG00000156261	rs2070610	CCT8	18.1787	3.68279	7.9688e-07	0.861155	protein_coding	TRUE	CCT8
chr21	cg25558037	ENSG00000182093	rs2836997	WRB	-31.67	3.54696	4.30744e-19	0.639999	protein_coding	TRUE	WRB
chr21	cg04455712	ENSG00000160208	rs9977076	RRP1B	-128.322	14.3677	4.21102e-19	0.587033	protein_coding	TRUE	RRP1B
chr21	cg16909583	ENSG00000160208	rs9977076	RRP1B	-63.4299	5.81636	1.08567e-27	0.55314	protein_coding	TRUE	RRP1B
chr21	cg16080308	ENSG00000160208	rs969060	RRP1B	-175.794	20.0102	1.56066e-18	0.535111	protein_coding	TRUE	RRP1B
chr21	cg13210069	ENSG00000160208	rs9977076	RRP1B	-95.1261	9.41331	5.22341e-24	0.484248	protein_coding	TRUE	RRP1B
chr21	cg12638745	ENSG00000185437	rs73367987	SH3BGR	4.25035	0.575204	1.47615e-13	0.289934	protein_coding	TRUE	SH3BGR
chr21	cg19498844	ENSG00000215447	rs9306123	BX322557.10	-4.92693	0.70193	2.23259e-12	0.2293	processed_transcript	TRUE	BX322557.10
chr22	cg12445256	ENSG00000186951	rs135538	PPARA	-130.1	18.8852	5.61917e-12	0.807612	protein_coding	TRUE	PPARA
chr22	cg12672222	ENSG00000280384	rs135539	RP4-695O20.1	-0.522807	0.102506	3.39149e-07	0.602757	sense_intronic	TRUE	RP4-695O20.1
chr22	cg16803515	ENSG00000186951	rs135549	PPARA	-71.3268	8.11164	1.45438e-18	0.572052	protein_coding	TRUE	PPARA
chr22	cg20078119	ENSG00000128408	rs2272804	RIBC2	-1.63342	0.225365	4.2339e-13	0.54223	protein_coding	TRUE	RIBC2
chr22	cg08066140	ENSG00000128408	rs8136881	RIBC2	-1.74997	0.310335	1.71066e-08	0.503906	protein_coding	TRUE	RIBC2
chr22	cg03061223	ENSG00000260708	rs809035	CTA-29F11.1	-11.6536	1.81042	1.21871e-10	0.456786	antisense	TRUE	CTA-29F11.1
chr22	cg05691848	ENSG00000186951	rs135549	PPARA	-87.419	12.5877	3.78984e-12	0.447762	protein_coding	TRUE	PPARA
chr22	cg12672222	ENSG00000186951	rs135539	PPARA	-81.8903	9.64837	2.11173e-17	0.365007	protein_coding	TRUE	PPARA
chr22	cg02543147	ENSG00000186951	rs135538	PPARA	-71.9693	8.24077	2.47281e-18	0.281197	protein_coding	TRUE	PPARA
chr22	cg23159233	ENSG00000186951	rs135538	PPARA	-75.3162	9.3216	6.4901e-16	0.280971	protein_coding	TRUE	PPARA
chr22	cg21330960	ENSG00000128266	rs9612218	GNAZ	-53.7352	10.7774	6.16659e-07	0.276891	protein_coding	TRUE	GNAZ
chr22	cg13252075	ENSG00000186951	rs135569	PPARA	-115.187	17.4476	4.0596e-11	0.276175	protein_coding	TRUE	PPARA
chr22	cg15911859	ENSG00000128408	rs2272804	RIBC2	-1.20634	0.158231	2.46044e-14	0.249129	protein_coding	TRUE	RIBC2
chr22	cg13703010	ENSG00000100225	rs9606961	FBXO7	-43.51	7.7	1.59838e-08	0.213909	protein_coding	TRUE	FBXO7
chr22	cg07410461	ENSG00000186951	rs135549	PPARA	-53.3202	6.10479	2.45469e-18	0.213863	protein_coding	TRUE	PPARA
chr22	cg12198176	ENSG00000128266	rs11090217	GNAZ	-16.3933	2.6964	1.20414e-09	0.210766	protein_coding	TRUE	GNAZ
chr22	cg22409069	ENSG00000100413	rs11554327	POLR3H	-3.21284	0.622965	2.50493e-07	0.145297	protein_coding	TRUE	POLR3H
chr22	cg08846053	ENSG00000186951	rs135549	PPARA	-63.686	7.38769	6.66268e-18	0.123818	protein_coding	TRUE	PPARA
chr22	cg03086022	ENSG00000224086	rs240066	LL22NC03-86G7.1	-5.82823	0.78277	9.64628e-14	0.122125	antisense	TRUE	LL22NC03-86G7.1
chr22	cg27087377	ENSG00000100099	rs3747135	HPS4	-35.1274	5.17338	1.12116e-11	0.108919	protein_coding	TRUE	HPS4
chr22	cg12490598	ENSG00000186951	rs135539	PPARA	-89.1373	12.1866	2.58536e-13	0.105539	protein_coding	TRUE	PPARA
chr22	cg20589873	ENSG00000186951	rs135538	PPARA	-109.231	15.6158	2.65417e-12	0.0698646	protein_coding	TRUE	PPARA
chr3	cg06820102	ENSG00000177311	rs1344672	ZBTB38	-13.687	2.29378	2.41603e-09	0.994203	protein_coding	TRUE	ZBTB38
chr3	cg03848978	ENSG00000177311	rs1344672	ZBTB38	-19.9222	3.23146	7.04472e-10	0.944943	protein_coding	TRUE	ZBTB38
chr3	cg11134956	ENSG00000196220	rs813606	SRGAP3	-28.2829	5.48597	2.52955e-07	0.937161	protein_coding	TRUE	SRGAP3
chr3	cg10394922	ENSG00000177311	rs1344672	ZBTB38	-33.2205	6.05909	4.18778e-08	0.921092	protein_coding	TRUE	ZBTB38
chr3	cg04352534	ENSG00000177311	rs13077048	ZBTB38	-10.8238	1.60344	1.47526e-11	0.87394	protein_coding	TRUE	ZBTB38
chr3	cg11421029	ENSG00000177311	rs13077048	ZBTB38	-13.5652	2.07777	6.63214e-11	0.870668	protein_coding	TRUE	ZBTB38
chr3	cg02860240	ENSG00000171757	rs9878797	LRRC34	-9.49094	1.57152	1.54733e-09	0.755279	protein_coding	TRUE	LRRC34
chr3	cg02936049	ENSG00000177311	rs1344672	ZBTB38	-14.6166	2.30452	2.25945e-10	0.709756	protein_coding	TRUE	ZBTB38
chr3	cg15407766	ENSG00000180370	rs1718406	PAK2	7.41763	1.2867	8.17391e-09	0.704421	protein_coding	TRUE	PAK2
chr3	cg22029806	ENSG00000114446	rs17231503	IFT57	8.63911	1.19658	5.20585e-13	0.663779	protein_coding	TRUE	IFT57
chr3	cg18495847	ENSG00000073792	rs35430985	IGF2BP2	-16.7778	2.2836	2.02527e-13	0.638968	protein_coding	TRUE	IGF2BP2
chr3	cg21380154	ENSG00000177311	rs1344672	ZBTB38	-16.9258	2.65136	1.72734e-10	0.603143	protein_coding	TRUE	ZBTB38
chr3	cg02058357	ENSG00000183185	rs12491083	GABRR3	-62.2081	10.1321	8.2673e-10	0.582326	protein_coding	TRUE	GABRR3
chr3	cg11100080	ENSG00000073792	rs35430985	IGF2BP2	-17.7629	3.38138	1.49521e-07	0.530025	protein_coding	TRUE	IGF2BP2
chr3	cg03187166	ENSG00000114446	rs17231503	IFT57	4.77161	0.599545	1.73833e-15	0.523978	protein_coding	TRUE	IFT57
chr3	cg22029806	ENSG00000196776	rs17231503	CD47	-286.375	30.7986	1.42681e-20	0.465848	protein_coding	TRUE	CD47
chr3	cg11741004	ENSG00000114446	rs17231503	IFT57	9.15379	1.32971	5.81659e-12	0.463514	protein_coding	TRUE	IFT57
chr3	cg19830534	ENSG00000113812	rs2276843	ACTR8	-9.63563	1.61419	2.38219e-09	0.446753	protein_coding	TRUE	ACTR8
chr3	cg08193579	ENSG00000171757	rs9878797	LRRC34	-7.68958	0.944257	3.83935e-16	0.445057	protein_coding	TRUE	LRRC34
chr3	cg03520471	ENSG00000183185	rs12491083	GABRR3	-67.9741	10.5871	1.35858e-10	0.428474	protein_coding	TRUE	GABRR3
chr3	cg05485589	ENSG00000070476	rs114432599	ZXDC	11.5251	1.84181	3.91248e-10	0.39435	protein_coding	TRUE	ZXDC
chr3	cg09010134	ENSG00000164048	rs9830016	ZNF589	-46.9754	5.52876	1.95309e-17	0.338477	protein_coding	TRUE	ZNF589
chr3	cg13787933	ENSG00000177311	rs13069734	ZBTB38	-38.3466	7.31006	1.55659e-07	0.295545	protein_coding	TRUE	ZBTB38
chr3	cg08932533	ENSG00000114446	rs17231503	IFT57	3.9561	0.491042	7.84857e-16	0.268301	protein_coding	TRUE	IFT57
chr3	cg06806080	ENSG00000114446	rs17231503	IFT57	5.99076	0.749372	1.30225e-15	0.215265	protein_coding	TRUE	IFT57
chr3	cg12422228	ENSG00000114446	rs17231503	IFT57	6.97293	0.912813	2.19006e-14	0.203281	protein_coding	TRUE	IFT57
chr3	cg08787647	ENSG00000163913	rs149948721	IFT122	6.05978	1.18422	3.10284e-07	0.181756	protein_coding	TRUE	IFT122
chr3	cg20828052	ENSG00000144909	rs7625936	OSBPL11	-0.913199	0.16655	4.18095e-08	0.161201	protein_coding	TRUE	OSBPL11
chr3	cg02487233	ENSG00000114446	rs17231503	IFT57	8.9881	1.24714	5.72114e-13	0.160191	protein_coding	TRUE	IFT57
chr3	cg05344026	ENSG00000171757	rs9878797	LRRC34	-14.5472	2.46962	3.85161e-09	0.158062	protein_coding	TRUE	LRRC34
chr3	cg00492070	ENSG00000114446	rs17231503	IFT57	6.54432	0.844728	9.39029e-15	0.140634	protein_coding	TRUE	IFT57
chr3	cg01500877	ENSG00000114503	rs7433167	NCBP2	-12.3296	1.82407	1.38561e-11	0.118508	protein_coding	TRUE	NCBP2
chr3	cg16306190	ENSG00000171757	rs9878797	LRRC34	-5.29635	0.859238	7.09285e-10	0.117108	protein_coding	TRUE	LRRC34
chr3	cg21503504	ENSG00000196220	rs586499	SRGAP3	-11.199	1.93938	7.71851e-09	0.0970651	protein_coding	TRUE	SRGAP3
chr3	cg16516295	ENSG00000163913	rs112016935	IFT122	5.42319	0.942186	8.6151e-09	0.0776359	protein_coding	TRUE	IFT122
chr3	cg27467234	ENSG00000171757	rs9878797	LRRC34	-12.7893	2.01004	1.98248e-10	0.0772272	protein_coding	TRUE	LRRC34
chr3	cg12397426	ENSG00000171757	rs9878797	LRRC34	-8.81499	1.28554	7.0314e-12	0.0678338	protein_coding	TRUE	LRRC34
chr3	cg01706045	ENSG00000183185	rs12491083	GABRR3	-82.273	13.6048	1.47249e-09	0.067319	protein_coding	TRUE	GABRR3
chr3	cg16814023	ENSG00000113812	rs2276843	ACTR8	-3.86549	0.335587	1.06329e-30	0.0555056	protein_coding	TRUE	ACTR8
chr3	cg08049441	ENSG00000163913	rs112016935	IFT122	5.44298	0.945851	8.68581e-09	0.0538794	protein_coding	TRUE	IFT122
chr3	cg03040360	ENSG00000114446	rs17231503	IFT57	-27.8079	4.9455	1.87812e-08	0.050447	protein_coding	TRUE	IFT57
chr4	cg10832655	ENSG00000173376	rs6534247	NDNF	-34.5011	4.30982	1.19241e-15	0.996856	protein_coding	TRUE	NDNF
chr4	cg18728025	ENSG00000173376	rs6534247	NDNF	-24.4489	2.96249	1.54697e-16	0.994531	protein_coding	TRUE	NDNF
chr4	cg00957698	ENSG00000173376	rs6534247	NDNF	-65.6963	12.6383	2.01221e-07	0.989614	protein_coding	TRUE	NDNF
chr4	cg02210466	ENSG00000173376	rs6534247	NDNF	-35.628	4.94762	5.97566e-13	0.982385	protein_coding	TRUE	NDNF
chr4	cg25550573	ENSG00000173376	rs6534247	NDNF	-22.6517	2.69349	4.10702e-17	0.968194	protein_coding	TRUE	NDNF
chr4	cg03509106	ENSG00000173376	rs6534247	NDNF	-57.81	8.57498	1.56529e-11	0.919506	protein_coding	TRUE	NDNF
chr4	cg08948841	ENSG00000196810	rs3775092	CTBP1-AS2	2.53589	0.306912	1.42516e-16	0.783412	antisense	TRUE	CTBP1-AS2
chr4	cg00563678	ENSG00000170153	rs78038613	RNF150	-106.182	17.9884	3.57397e-09	0.779521	protein_coding	TRUE	RNF150
chr4	cg12836958	ENSG00000109762	rs3108244	SNX25	-22.6392	2.05144	2.5699e-28	0.777904	protein_coding	TRUE	SNX25
chr4	cg01881046	ENSG00000109762	rs3108244	SNX25	-13.6558	1.09417	9.53709e-36	0.741657	protein_coding	TRUE	SNX25
chr4	cg06481168	ENSG00000250486	rs3733419	FAM218A	1.79682	0.345246	1.94568e-07	0.710011	protein_coding	TRUE	FAM218A
chr4	cg26807632	ENSG00000170153	rs2220344	RNF150	-76.949	14.2084	6.10415e-08	0.665863	protein_coding	TRUE	RNF150
chr4	cg04672903	ENSG00000251580	rs2301787	RP11-539L10.3	-1.5036	0.277164	5.79706e-08	0.610175	lincRNA	TRUE	RP11-539L10.3
chr4	cg11427455	ENSG00000170153	rs78038613	RNF150	-76.4406	13.1426	6.01788e-09	0.575983	protein_coding	TRUE	RNF150
chr4	cg17998594	ENSG00000109762	rs3108244	SNX25	-44.3691	6.01281	1.59359e-13	0.544676	protein_coding	TRUE	SNX25
chr4	cg04849770	ENSG00000251200	rs17711139	RP11-6E9.5	-36.4552	7.38478	7.95244e-07	0.538033	antisense	TRUE	RP11-6E9.5
chr4	cg08095852	ENSG00000150627	rs34435561	WDR17	-84.1795	10.8406	8.15236e-15	0.527897	protein_coding	TRUE	WDR17
chr4	cg08240002	ENSG00000109762	rs3108244	SNX25	-11.5463	0.930638	2.39936e-35	0.525826	protein_coding	TRUE	SNX25
chr4	cg07745915	ENSG00000196810	rs3775092	CTBP1-AS2	5.52159	0.965247	1.06279e-08	0.486456	antisense	TRUE	CTBP1-AS2
chr4	cg25897951	ENSG00000196810	rs3775092	CTBP1-AS2	3.33177	0.456213	2.81229e-13	0.438715	antisense	TRUE	CTBP1-AS2
chr4	cg03217528	ENSG00000168491	rs66481949	CCDC110	4.06109	0.664889	1.00933e-09	0.303791	protein_coding	TRUE	CCDC110
chr4	cg15478081	ENSG00000109762	rs3108297	SNX25	-44.9345	5.6146	1.21279e-15	0.294834	protein_coding	TRUE	SNX25
chr4	cg06435920	ENSG00000109519	rs9986037	GRPEL1	-38.852	7.66438	3.99563e-07	0.293504	protein_coding	TRUE	GRPEL1
chr4	cg13036656	ENSG00000242686	rs28569875	RP11-1191J2.2	4.32019	0.743719	6.28838e-09	0.237354	antisense	TRUE	RP11-1191J2.2
chr4	cg04274830	ENSG00000138760	rs12508223	SCARB2	-69.7497	13.6304	3.10048e-07	0.226789	protein_coding	TRUE	SCARB2
chr4	cg12414557	ENSG00000178222	rs11510471	RNF212	-0.652047	0.120126	5.69773e-08	0.216002	protein_coding	TRUE	RNF212
chr4	cg02503808	ENSG00000109519	rs3822269	GRPEL1	-12.3024	1.27188	3.94234e-22	0.210156	protein_coding	TRUE	GRPEL1
chr4	cg24044084	ENSG00000109572	rs7696352	CLCN3	-27.9906	4.6153	1.32169e-09	0.183361	protein_coding	TRUE	CLCN3
chr4	cg13943980	ENSG00000170846	rs3214185	AC093323.3	17.7193	3.22158	3.79428e-08	0.155923	lincRNA	TRUE	AC093323.3
chr4	cg26479374	ENSG00000090316	rs2199956	MAEA	3.73608	0.625966	2.39433e-09	0.0904339	protein_coding	TRUE	MAEA
chr4	cg13110555	ENSG00000150627	rs36008793	WDR17	-36.5011	4.01648	1.01017e-19	0.0833025	protein_coding	TRUE	WDR17
chr4	cg12244133	ENSG00000150627	rs36008793	WDR17	-40.8715	4.47734	6.94498e-20	0.0637834	protein_coding	TRUE	WDR17
chr5	cg17317391	ENSG00000164404	rs30179	GDF9	-2.51934	0.490449	2.79436e-07	0.983477	protein_coding	TRUE	GDF9
chr5	cg25476565	ENSG00000164904	rs900641	ALDH7A1	-21.8517	3.2885	3.03457e-11	0.966076	protein_coding	TRUE	ALDH7A1
chr5	cg12532266	ENSG00000164404	rs30179	GDF9	-1.9392	0.358474	6.31649e-08	0.961463	protein_coding	TRUE	GDF9
chr5	cg00716870	ENSG00000131507	rs13188700	NDFIP1	-131.461	17.4832	5.50872e-14	0.88276	protein_coding	TRUE	NDFIP1
chr5	cg04869206	ENSG00000164327	rs35476737	RICTOR	112.622	18.378	8.89406e-10	0.848398	protein_coding	TRUE	RICTOR
chr5	cg15325397	ENSG00000154122	rs35088258	ANKH	-47.2528	8.92024	1.17552e-07	0.848303	protein_coding	TRUE	ANKH
chr5	cg18060909	ENSG00000197043	rs2346026	ANXA6	-56.9369	9.06063	3.29984e-10	0.725717	protein_coding	TRUE	ANXA6
chr5	cg21377673	ENSG00000129596	rs34869	CDO1	-6.70098	1.13796	3.89546e-09	0.646234	protein_coding	TRUE	CDO1
chr5	cg26210449	ENSG00000050748	rs3749791	MAPK9	-14.5068	2.82286	2.76147e-07	0.284904	protein_coding	TRUE	MAPK9
chr5	cg06795995	ENSG00000155542	rs185220	SETD9	-4.20767	0.713733	3.7401e-09	0.282207	protein_coding	TRUE	SETD9
chr5	cg03653511	ENSG00000184840	rs34582406	TMED9	9.96476	1.83552	5.67159e-08	0.266465	protein_coding	TRUE	TMED9
chr5	cg05015628	ENSG00000164327	rs13184911	RICTOR	-88.0808	11.8115	8.83669e-14	0.266037	protein_coding	TRUE	RICTOR
chr5	cg24151027	ENSG00000245556	rs4530741	SCAMP1-AS1	-3.54864	0.71815	7.75771e-07	0.256497	lincRNA	TRUE	SCAMP1-AS1
chr5	cg14703610	ENSG00000155542	rs252923	SETD9	6.20299	0.973229	1.84623e-10	0.166151	protein_coding	TRUE	SETD9
chr5	cg17813930	ENSG00000225138	rs10474783	CTD-2228K2.7	18.8664	3.14465	1.9792e-09	0.134365	processed_transcript	TRUE	CTD-2228K2.7
chr5	cg07905924	ENSG00000155542	rs185220	SETD9	-2.55452	0.222213	1.38502e-30	0.126035	protein_coding	TRUE	SETD9
chr5	cg00995047	ENSG00000188002	rs4975678	RP11-43F13.1	-5.86957	1.13946	2.58824e-07	0.063413	transcribed_unprocessed_pseudogene	TRUE	RP11-43F13.1
chr5	cg17347828	ENSG00000131507	rs13188700	NDFIP1	-144.377	24.4839	3.70619e-09	0.0521013	protein_coding	TRUE	NDFIP1
chr6	cg25680145	ENSG00000111906	rs73581685	HDDC2	-17.892	3.24557	3.533e-08	0.844931	protein_coding	TRUE	HDDC2
chr6	cg02939918	ENSG00000051620	rs11441776	HEBP2	-20.5499	2.58006	1.65354e-15	0.789481	protein_coding	TRUE	HEBP2
chr6	cg17104905	ENSG00000124570	rs7751512	SERPINB6	-26.7036	3.90373	7.89002e-12	0.779323	protein_coding	TRUE	SERPINB6
chr6	cg21668832	ENSG00000079691	rs2744254	LRRC16A	-1.09066	0.151824	6.78498e-13	0.741205	protein_coding	TRUE	LRRC16A
chr6	cg17388039	ENSG00000051620	rs11441776	HEBP2	-31.6583	5.91083	8.50908e-08	0.701872	protein_coding	TRUE	HEBP2
chr6	cg26241416	ENSG00000157593	rs13296	SLC35B2	-2.78505	0.533055	1.74446e-07	0.651766	protein_coding	TRUE	SLC35B2
chr6	cg11457367	ENSG00000137261	rs2038137	KIAA0319	2.91182	0.344154	2.65581e-17	0.623641	protein_coding	TRUE	KIAA0319
chr6	cg02206980	ENSG00000124523	rs2841506	SIRT5	3.70816	0.453057	2.72865e-16	0.532574	protein_coding	TRUE	SIRT5
chr6	cg14873182	ENSG00000203756	rs9321194	TMEM244	-28.6088	5.45547	1.57079e-07	0.508381	protein_coding	TRUE	TMEM244
chr6	cg15038512	ENSG00000184465	rs4716383	WDR27	-6.44753	1.21129	1.02154e-07	0.47089	protein_coding	TRUE	WDR27
chr6	cg22015766	ENSG00000065060	rs71538269	UHRF1BP1	-12.3067	1.59311	1.11883e-14	0.396729	protein_coding	TRUE	UHRF1BP1
chr6	cg11561443	ENSG00000135297	rs9341424	MTO1	5.45648	0.980584	2.62865e-08	0.368442	protein_coding	TRUE	MTO1
chr6	cg10643581	ENSG00000216775	rs1513356	RP1-152L7.5	-18.9333	2.63133	6.23164e-13	0.321909	transcribed_unprocessed_pseudogene	TRUE	RP1-152L7.5
chr6	cg09234670	ENSG00000224846	rs2070998	RP1-90J20.8	-2.6177	0.433391	1.54077e-09	0.308015	antisense	TRUE	RP1-90J20.8
chr6	cg03187809	ENSG00000180992	rs200890946	MRPL14	-10.155	1.69095	1.90753e-09	0.247944	protein_coding	TRUE	MRPL14
chr6	cg07838230	ENSG00000112365	rs9398202	ZBTB24	7.8332	1.34575	5.85988e-09	0.237778	protein_coding	TRUE	ZBTB24
chr6	cg06733526	ENSG00000112365	rs6911838	ZBTB24	-23.8843	4.79774	6.41664e-07	0.208568	protein_coding	TRUE	ZBTB24
chr6	cg10519906	ENSG00000065060	rs71538269	UHRF1BP1	-10.0625	1.13882	9.93078e-19	0.177636	protein_coding	TRUE	UHRF1BP1
chr6	cg21102926	ENSG00000137267	rs909963	TUBB2A	12.9419	2.58808	5.71646e-07	0.169497	protein_coding	TRUE	TUBB2A
chr6	cg04623147	ENSG00000213066	rs11399450	FGFR1OP	-15.4033	2.33987	4.61123e-11	0.16577	protein_coding	TRUE	FGFR1OP
chr6	cg13654195	ENSG00000124784	rs6597266	RIOK1	-2.25927	0.396392	1.20095e-08	0.102991	protein_coding	TRUE	RIOK1
chr6	cg07157058	ENSG00000124784	rs6597266	RIOK1	-1.82282	0.323492	1.75239e-08	0.0961712	protein_coding	TRUE	RIOK1
chr6	cg24751129	ENSG00000124713	rs10948059	GNMT	-1.31558	0.204241	1.18426e-10	0.0802748	protein_coding	TRUE	GNMT
chr7	cg01270001	ENSG00000261305	rs112634179	RP4-584D14.7	1.02661	0.182748	1.93622e-08	0.93856	sense_overlapping	TRUE	RP4-584D14.7
chr7	cg26260033	ENSG00000188185	rs12701758	LINC00265	-0.868145	0.165281	1.50014e-07	0.838126	lincRNA	TRUE	LINC00265
chr7	cg26437564	ENSG00000272556	rs73104620	GTF2IP13	-2.42525	0.344752	1.99602e-12	0.812314	transcribed_unprocessed_pseudogene	TRUE	GTF2IP13
chr7	cg01324200	ENSG00000186088	rs9641220	GSAP	-24.2337	4.55259	1.0204e-07	0.796047	protein_coding	TRUE	GSAP
chr7	cg17228231	ENSG00000133606	rs10952680	MKRN1	-30.6912	6.21724	7.95526e-07	0.750671	protein_coding	TRUE	MKRN1
chr7	cg10089657	ENSG00000164849	rs143361185	GPR146	-5.17023	0.866432	2.41272e-09	0.566266	protein_coding	TRUE	GPR146
chr7	cg18833928	ENSG00000211695	rs2534568	TRGV9	-1.1797	0.2279	2.26198e-07	0.405817	TR_V_gene	TRUE	TRGV9
chr7	cg02184386	ENSG00000164849	rs884977	GPR146	-7.1434	1.36928	1.8193e-07	0.393544	protein_coding	TRUE	GPR146
chr7	cg11742189	ENSG00000106348	rs144398561	IMPDH1	-45.1782	7.97339	1.46071e-08	0.390448	protein_coding	TRUE	IMPDH1
chr7	cg16218477	ENSG00000164849	rs884977	GPR146	-2.24317	0.287821	6.50991e-15	0.377845	protein_coding	TRUE	GPR146
chr7	cg19814210	ENSG00000186088	rs9641220	GSAP	10.7279	1.35217	2.12435e-15	0.305377	protein_coding	TRUE	GSAP
chr7	cg04816311	ENSG00000164849	rs884977	GPR146	-5.25898	0.792017	3.13722e-11	0.290207	protein_coding	TRUE	GPR146
chr7	cg18552620	ENSG00000164543	rs6948092	STK17A	4.32905	0.83012	1.83843e-07	0.124437	protein_coding	TRUE	STK17A
chr7	cg13901245	ENSG00000105877	rs2285943	DNAH11	-1.38481	0.204088	1.15813e-11	0.120005	protein_coding	TRUE	DNAH11
chr7	cg07541023	ENSG00000105849	rs2072185	TWISTNB	6.96643	1.32771	1.54624e-07	0.0874567	protein_coding	TRUE	TWISTNB
chr7	cg23358095	ENSG00000164828	rs6959154	SUN1	-20.8551	3.96889	1.48305e-07	0.0785169	protein_coding	TRUE	SUN1
chr8	cg07622412	ENSG00000120910	rs10094778	PPP3CC	-33.5484	6.30993	1.05629e-07	0.925008	protein_coding	TRUE	PPP3CC
chr8	cg26101170	ENSG00000254093	rs56057779	PINX1	1.2034	0.232376	2.23446e-07	0.893068	protein_coding	TRUE	PINX1
chr8	cg27411982	ENSG00000254093	rs4841407	PINX1	-7.01312	1.39178	4.68095e-07	0.76761	protein_coding	TRUE	PINX1
chr8	cg09768257	ENSG00000154328	rs2686211	NEIL2	-10.6526	1.4454	1.70653e-13	0.477483	protein_coding	TRUE	NEIL2
chr8	cg19216211	ENSG00000158941	rs3735901	CCAR2	12.6351	2.37296	1.01154e-07	0.366235	protein_coding	TRUE	CCAR2
chr8	cg03651525	ENSG00000171320	rs35430328	ESCO2	-0.33691	0.0496889	1.19857e-11	0.330489	protein_coding	TRUE	ESCO2
chr8	cg03651525	ENSG00000147419	rs35430328	CCDC25	-3.5503	0.492735	5.79153e-13	0.278141	protein_coding	TRUE	CCDC25
chr8	cg11647077	ENSG00000154328	rs804269	NEIL2	-20.0684	3.27656	9.07832e-10	0.266657	protein_coding	TRUE	NEIL2
chr8	cg14715413	ENSG00000255020	rs2572387	AF131216.5	17.5288	2.99602	4.89526e-09	0.237653	antisense	TRUE	AF131216.5
chr8	cg07298985	ENSG00000197181	rs34010761	PIWIL2	-2.22619	0.327775	1.10743e-11	0.195298	protein_coding	TRUE	PIWIL2
chr8	cg21775007	ENSG00000255020	rs6601582	AF131216.5	-2.67148	0.356805	7.03456e-14	0.194224	antisense	TRUE	AF131216.5
chr8	cg06282530	ENSG00000253716	rs13272454	MINCR	3.70461	0.645859	9.69731e-09	0.127006	antisense	TRUE	MINCR
chr9	cg13470032	ENSG00000183784	rs2484966	C9orf66	-0.827107	0.123697	2.28495e-11	0.951784	protein_coding	TRUE	C9orf66
chr9	cg03808351	ENSG00000056558	rs3761849	TRAF1	22.2697	3.87257	8.89106e-09	0.89625	protein_coding	TRUE	TRAF1
chr9	cg13736810	ENSG00000197958	rs2247310	RPL12	84.722	17.194	8.33274e-07	0.88928	protein_coding	TRUE	RPL12
chr9	cg04498816	ENSG00000183784	rs2484966	C9orf66	-0.533842	0.0746617	8.66911e-13	0.835561	protein_coding	TRUE	C9orf66
chr9	cg11148251	ENSG00000136824	rs4742904	SMC2	6.24792	0.617703	4.75181e-24	0.819336	protein_coding	TRUE	SMC2
chr9	cg14953650	ENSG00000130723	rs34830565	PRRC2B	-93.7329	18.17	2.48732e-07	0.724565	protein_coding	TRUE	PRRC2B
chr9	cg15998541	ENSG00000095209	rs2271247	TMEM38B	11.2891	1.93406	5.31566e-09	0.694804	protein_coding	TRUE	TMEM38B
chr9	cg16223770	ENSG00000165661	rs67827752	QSOX2	-7.43014	1.31048	1.42979e-08	0.693942	protein_coding	TRUE	QSOX2
chr9	cg04498816	ENSG00000107099	rs2484966	DOCK8	-19.9041	2.38672	7.45788e-17	0.646961	protein_coding	TRUE	DOCK8
chr9	cg23964386	ENSG00000106853	rs59942393	PTGR1	-20.2078	3.93541	2.82328e-07	0.64365	protein_coding	TRUE	PTGR1
chr9	cg20999934	ENSG00000086102	rs830576	NFX1	-44.1641	7.54597	4.83728e-09	0.63911	protein_coding	TRUE	NFX1
chr9	cg10991612	ENSG00000095209	rs143959239	TMEM38B	-5.36039	0.989516	6.05468e-08	0.61641	protein_coding	TRUE	TMEM38B
chr9	cg13470032	ENSG00000107099	rs2484966	DOCK8	-30.8385	4.04265	2.37892e-14	0.561075	protein_coding	TRUE	DOCK8
chr9	cg02048133	ENSG00000230074	rs2026118	RP11-195F19.9	-0.891304	0.170681	1.76956e-07	0.434644	antisense	TRUE	RP11-195F19.9
chr9	cg14561904	ENSG00000106853	rs41279069	PTGR1	15.9582	2.36366	1.4635e-11	0.342287	protein_coding	TRUE	PTGR1
chr9	cg01248375	ENSG00000090054	rs10992234	SPTLC1	14.2628	2.60045	4.14064e-08	0.25266	protein_coding	TRUE	SPTLC1
chr9	cg01558660	ENSG00000106993	rs2295964	CDC37L1	-4.2221	0.657133	1.31845e-10	0.153017	protein_coding	TRUE	CDC37L1
chr9	cg17079172	ENSG00000197958	rs3808831	RPL12	147.662	28.8468	3.07444e-07	0.125106	protein_coding	TRUE	RPL12
chr9	cg14774860	ENSG00000262075	rs28380074	DKFZP434A062	37.5456	6.11806	8.4176e-10	0.0837761	lincRNA	TRUE	DKFZP434A062

## Sheet: M2E_SMR_SE
chr	exposure	trait	top_snp	Gene_symbol	bxy	bxy_se	bxy_pval	heidi_pval	Biotype	HEIDI_Pvalue_Significant	Target gene based on SE
chr1	cg10768996	ENSG00000133069	rs1172113	TMCC2	-20.7659	3.75326	3.15234e-08	0.978877	protein_coding	TRUE	TMCC2
chr1	cg16924704	ENSG00000189266	rs75910560	PNRC2	-22.0204	3.36129	5.7084e-11	0.940071	protein_coding	TRUE	PNRC2
chr1	cg23975251	ENSG00000142655	rs202087283	PEX14	-12.2757	1.65117	1.04939e-13	0.904104	protein_coding	TRUE	PEX14
chr1	cg25763306	ENSG00000270035	rs12747548	RP11-338N10.2	-1.12179	0.161553	3.81764e-12	0.886751	lincRNA	TRUE	RP11-338N10.2
chr1	cg23863608	ENSG00000142655	rs202087283	PEX14	-15.1069	1.76234	1.01633e-17	0.880154	protein_coding	TRUE	PEX14
chr1	cg12944311	ENSG00000142655	rs1411402	PEX14	-17.6479	2.55461	4.90633e-12	0.855245	protein_coding	TRUE	PEX14
chr1	cg12806121	ENSG00000142655	rs2483677	PEX14	-13.1072	1.5693	6.69619e-17	0.824361	protein_coding	TRUE	PEX14
chr1	cg00843917	ENSG00000116514	rs194644	RNF19B	-17.273	2.68431	1.23635e-10	0.780739	protein_coding	TRUE	RNF19B
chr1	cg16057915	ENSG00000142655	rs202087283	PEX14	-16.7934	3.24099	2.20029e-07	0.759994	protein_coding	TRUE	PEX14
chr1	cg07302580	ENSG00000081277	rs11801270	PKP1	-129.197	22.8339	1.53052e-08	0.758408	protein_coding	TRUE	PKP1
chr1	cg18879300	ENSG00000117115	rs910223	PADI2	-209.369	35.5223	3.7692e-09	0.737645	protein_coding	TRUE	PADI2
chr1	cg10120255	ENSG00000116514	rs35049190	RNF19B	-16.9461	2.48983	1.0027e-11	0.720405	protein_coding	TRUE	RNF19B
chr1	cg22358066	ENSG00000189266	rs140748141	PNRC2	-33.5527	4.93143	1.01869e-11	0.708658	protein_coding	TRUE	PNRC2
chr1	cg10233913	ENSG00000117115	rs910223	PADI2	-158.081	29.9772	1.33947e-07	0.679341	protein_coding	TRUE	PADI2
chr1	cg06900068	ENSG00000117115	rs910223	PADI2	-218.288	42.1389	2.21647e-07	0.667006	protein_coding	TRUE	PADI2
chr1	cg11170025	ENSG00000133069	rs1668871	TMCC2	-16.499	2.68892	8.46623e-10	0.653754	protein_coding	TRUE	TMCC2
chr1	cg03579872	ENSG00000116171	rs1242331	SCP2	-16.5876	1.77931	1.13668e-20	0.619584	protein_coding	TRUE	SCP2
chr1	cg04923746	ENSG00000223649	rs10863899	RP11-359E8.3	-0.612375	0.0928005	4.14418e-11	0.612338	lincRNA	TRUE	RP11-359E8.3
chr1	cg23072051	ENSG00000142655	rs2506885	PEX14	-28.0206	4.68341	2.19142e-09	0.603933	protein_coding	TRUE	PEX14
chr1	cg27409662	ENSG00000189266	rs140748141	PNRC2	-20.9512	2.97751	1.97141e-12	0.602706	protein_coding	TRUE	PNRC2
chr1	cg12830684	ENSG00000142655	rs2483677	PEX14	-9.67757	1.11962	5.44444e-18	0.599976	protein_coding	TRUE	PEX14
chr1	cg00569276	ENSG00000117115	rs910223	PADI2	-108.057	16.4713	5.37009e-11	0.597562	protein_coding	TRUE	PADI2
chr1	cg04289045	ENSG00000116198	rs12736124	CEP104	-24.0466	4.7995	5.43679e-07	0.596576	protein_coding	TRUE	CEP104
chr1	cg27529520	ENSG00000117115	rs1022579	PADI2	-63.2115	7.05682	3.32112e-19	0.566623	protein_coding	TRUE	PADI2
chr1	cg00597915	ENSG00000117115	rs910223	PADI2	-89.5755	12.1056	1.36687e-13	0.566117	protein_coding	TRUE	PADI2
chr1	cg04906435	ENSG00000116514	rs171837	RNF19B	-19.8988	3.60995	3.54347e-08	0.53706	protein_coding	TRUE	RNF19B
chr1	cg03384426	ENSG00000189266	rs75910560	PNRC2	-17.6924	2.81811	3.42707e-10	0.532286	protein_coding	TRUE	PNRC2
chr1	cg08859206	ENSG00000116171	rs1242331	SCP2	-10.8173	1.21214	4.49163e-19	0.531422	protein_coding	TRUE	SCP2
chr1	cg21931713	ENSG00000142655	rs1411402	PEX14	-41.2384	7.6845	8.03088e-08	0.523728	protein_coding	TRUE	PEX14
chr1	cg24294013	ENSG00000142655	rs2483677	PEX14	-12.711	1.61311	3.2777e-15	0.519463	protein_coding	TRUE	PEX14
chr1	cg04021497	ENSG00000189266	rs72540327	PNRC2	-15.1562	2.13863	1.37192e-12	0.509019	protein_coding	TRUE	PNRC2
chr1	cg06004306	ENSG00000117115	rs910223	PADI2	-78.3972	9.06359	5.16426e-18	0.504824	protein_coding	TRUE	PADI2
chr1	cg12744321	ENSG00000116198	rs34966926	CEP104	-19.9213	3.53278	1.71049e-08	0.496096	protein_coding	TRUE	CEP104
chr1	cg16835277	ENSG00000117115	rs1022579	PADI2	-127.829	17.4972	2.75858e-13	0.458	protein_coding	TRUE	PADI2
chr1	cg04585221	ENSG00000142655	rs1411402	PEX14	-12.3721	1.54465	1.15072e-15	0.45767	protein_coding	TRUE	PEX14
chr1	cg01834541	ENSG00000142655	rs2483677	PEX14	-9.71456	1.0166	1.2244e-21	0.451794	protein_coding	TRUE	PEX14
chr1	cg00889473	ENSG00000116198	rs34966926	CEP104	-16.072	2.90101	3.02198e-08	0.451701	protein_coding	TRUE	CEP104
chr1	cg04310824	ENSG00000116171	rs1242331	SCP2	-31.3521	4.82403	8.07752e-11	0.436297	protein_coding	TRUE	SCP2
chr1	cg02813845	ENSG00000116171	rs1242331	SCP2	-8.4304	0.845495	2.04231e-23	0.434766	protein_coding	TRUE	SCP2
chr1	cg25767906	ENSG00000116171	rs1242331	SCP2	-10.4479	1.06454	9.75272e-23	0.411875	protein_coding	TRUE	SCP2
chr1	cg15554126	ENSG00000142655	rs2483677	PEX14	-20.2484	2.60503	7.67625e-15	0.406065	protein_coding	TRUE	PEX14
chr1	cg09871079	ENSG00000116514	rs9425969	RNF19B	21.8396	4.33651	4.74822e-07	0.388159	protein_coding	TRUE	RNF19B
chr1	cg24484971	ENSG00000223649	rs10863899	RP11-359E8.3	-0.701815	0.116716	1.82087e-09	0.38767	lincRNA	TRUE	RP11-359E8.3
chr1	cg03609269	ENSG00000116171	rs1242331	SCP2	-11.4194	1.17902	3.47425e-22	0.386256	protein_coding	TRUE	SCP2
chr1	cg22157494	ENSG00000116198	rs12755519	CEP104	-17.3177	3.47969	6.46451e-07	0.378574	protein_coding	TRUE	CEP104
chr1	cg10768996	ENSG00000133059	rs1172113	DSTYK	19.3193	3.50653	3.59841e-08	0.373329	protein_coding	TRUE	DSTYK
chr1	cg23987244	ENSG00000142655	rs2483677	PEX14	-11.1434	1.31414	2.26021e-17	0.370312	protein_coding	TRUE	PEX14
chr1	cg16007395	ENSG00000116514	rs35154516	RNF19B	28.8493	5.83935	7.79268e-07	0.36562	protein_coding	TRUE	RNF19B
chr1	cg01802117	ENSG00000116171	rs1242331	SCP2	-5.87309	0.591554	3.13768e-23	0.363771	protein_coding	TRUE	SCP2
chr1	cg27535305	ENSG00000116171	rs1242331	SCP2	-12.297	1.20569	2.00037e-24	0.356772	protein_coding	TRUE	SCP2
chr1	cg10799510	ENSG00000081277	rs11801270	PKP1	-142.884	27.8454	2.87698e-07	0.342498	protein_coding	TRUE	PKP1
chr1	cg05454781	ENSG00000142655	rs2483677	PEX14	-22.2546	2.81253	2.51925e-15	0.33574	protein_coding	TRUE	PEX14
chr1	cg00658007	ENSG00000223649	rs1122745	RP11-359E8.3	-0.421515	0.0673023	3.77594e-10	0.335527	lincRNA	TRUE	RP11-359E8.3
chr1	cg00489772	ENSG00000116198	rs12131756	CEP104	-14.1086	2.49377	1.53549e-08	0.326709	protein_coding	TRUE	CEP104
chr1	cg09319435	ENSG00000142655	rs2026792	PEX14	-21.7064	2.5999	6.88845e-17	0.302925	protein_coding	TRUE	PEX14
chr1	cg20055417	ENSG00000116171	rs1242331	SCP2	-7.21994	0.71593	6.45641e-24	0.287825	protein_coding	TRUE	SCP2
chr1	cg06753273	ENSG00000223649	rs1122745	RP11-359E8.3	-0.391491	0.0636758	7.83692e-10	0.275138	lincRNA	TRUE	RP11-359E8.3
chr1	cg14806693	ENSG00000116514	rs171837	RNF19B	-8.62852	0.997575	5.17242e-18	0.267092	protein_coding	TRUE	RNF19B
chr1	cg07357157	ENSG00000142655	rs2483677	PEX14	-24.6484	3.0967	1.72652e-15	0.246068	protein_coding	TRUE	PEX14
chr1	cg01063935	ENSG00000142655	rs2483677	PEX14	-14.1998	1.79662	2.70929e-15	0.240358	protein_coding	TRUE	PEX14
chr1	cg00695362	ENSG00000131238	rs3131684	PPT1	-28.0265	4.38122	1.58499e-10	0.232089	protein_coding	TRUE	PPT1
chr1	cg27398908	ENSG00000223649	rs7527603	RP11-359E8.3	-0.94311	0.190738	7.63265e-07	0.231309	lincRNA	TRUE	RP11-359E8.3
chr1	cg27182133	ENSG00000142655	rs2150038	PEX14	-27.0781	4.43655	1.03818e-09	0.228242	protein_coding	TRUE	PEX14
chr1	cg04607379	ENSG00000142655	rs2026792	PEX14	-15.2562	1.84561	1.38303e-16	0.221836	protein_coding	TRUE	PEX14
chr1	cg15590113	ENSG00000117115	rs35989645	PADI2	-159.058	22.4508	1.39328e-12	0.203528	protein_coding	TRUE	PADI2
chr1	cg10512769	ENSG00000198570	rs12733443	RD3	-16.934	3.04059	2.55724e-08	0.192574	protein_coding	TRUE	RD3
chr1	cg03579872	ENSG00000121310	rs1242331	ECHDC2	-21.5825	3.73214	7.34404e-09	0.190203	protein_coding	TRUE	ECHDC2
chr1	cg08859206	ENSG00000121310	rs1242331	ECHDC2	-14.0747	2.47623	1.31639e-08	0.188436	protein_coding	TRUE	ECHDC2
chr1	cg26266099	ENSG00000116514	rs194670	RNF19B	-9.9586	1.19996	1.04897e-16	0.170292	protein_coding	TRUE	RNF19B
chr1	ch.1.173201084F	ENSG00000152061	rs61828157	RABGAP1L	10.725	1.76817	1.31471e-09	0.168711	protein_coding	TRUE	RABGAP1L
chr1	cg11633926	ENSG00000270171	rs2995035	RP11-338N10.1	-21.3909	4.28433	5.95016e-07	0.161874	lincRNA	TRUE	RP11-338N10.1
chr1	cg03609269	ENSG00000121310	rs1242331	ECHDC2	-14.8581	2.5327	4.45122e-09	0.157224	protein_coding	TRUE	ECHDC2
chr1	cg02813845	ENSG00000121310	rs1242331	ECHDC2	-10.969	1.85031	3.06313e-09	0.144439	protein_coding	TRUE	ECHDC2
chr1	cg03522107	ENSG00000037637	rs3738631	FBXO42	30.4889	5.55467	4.04496e-08	0.143131	protein_coding	TRUE	FBXO42
chr1	cg27535305	ENSG00000121310	rs1242331	ECHDC2	-16	2.67778	2.29969e-09	0.136229	protein_coding	TRUE	ECHDC2
chr1	cg25767906	ENSG00000121310	rs1242331	ECHDC2	-13.594	2.3061	3.75163e-09	0.130551	protein_coding	TRUE	ECHDC2
chr1	cg01802117	ENSG00000121310	rs1242331	ECHDC2	-7.6416	1.29099	3.23589e-09	0.125695	protein_coding	TRUE	ECHDC2
chr1	cg05531421	ENSG00000116675	rs10789179	DNAJC6	19.8523	3.19629	5.26401e-10	0.122897	protein_coding	TRUE	DNAJC6
chr1	cg26362368	ENSG00000142655	rs2506892	PEX14	-10.4299	1.19805	3.15584e-18	0.103553	protein_coding	TRUE	PEX14
chr1	cg16109817	ENSG00000179743	rs6666548	FLJ37453	0.882332	0.179022	8.28146e-07	0.10127	antisense	TRUE	FLJ37453
chr1	cg12908607	ENSG00000117407	rs12127737	ARTN	0.423405	0.0744365	1.28439e-08	0.101264	protein_coding	TRUE	ARTN
chr1	cg06792911	ENSG00000227533	rs17387775	SLC2A1-AS1	-5.10836	0.418149	2.53452e-34	0.0992298	lincRNA	TRUE	SLC2A1-AS1
chr1	cg16819028	ENSG00000081277	rs12117501	PKP1	-90.0096	15.5287	6.77763e-09	0.097915	protein_coding	TRUE	PKP1
chr1	cg11170025	ENSG00000133059	rs1668871	DSTYK	14.2198	2.46175	7.63574e-09	0.0967773	protein_coding	TRUE	DSTYK
chr1	cg27571230	ENSG00000142655	rs2847344	PEX14	16.7769	2.1815	1.46529e-14	0.0967126	protein_coding	TRUE	PEX14
chr1	cg20055417	ENSG00000121310	rs1242331	ECHDC2	-9.39402	1.57834	2.65179e-09	0.0953521	protein_coding	TRUE	ECHDC2
chr1	cg20677516	ENSG00000228288	rs2275895	PCAT6	-7.92631	1.1075	8.25042e-13	0.0800014	antisense	TRUE	PCAT6
chr1	cg06080068	ENSG00000142655	rs3215946	PEX14	-13.8827	2.01381	5.43346e-12	0.0747827	protein_coding	TRUE	PEX14
chr1	cg10512769	ENSG00000223649	rs12733443	RP11-359E8.3	-0.274189	0.040304	1.0244e-11	0.070516	lincRNA	TRUE	RP11-359E8.3
chr1	cg05990710	ENSG00000231768	rs271761	LINC01354	-1.75993	0.328118	8.15329e-08	0.0679535	lincRNA	TRUE	LINC01354
chr1	cg10714509	ENSG00000231768	rs271761	LINC01354	-1.40697	0.260385	6.53777e-08	0.0652414	lincRNA	TRUE	LINC01354
chr1	cg09003612	ENSG00000227533	rs17387775	SLC2A1-AS1	-2.61075	0.163219	1.37627e-57	0.0538285	lincRNA	TRUE	SLC2A1-AS1
chr1	cg02987928	ENSG00000037637	rs3738631	FBXO42	22.3049	4.01852	2.8481e-08	0.0534186	protein_coding	TRUE	FBXO42
chr10	cg19936380	ENSG00000099204	rs11196819	ABLIM1	-98.7621	20.0622	8.53223e-07	0.971157	protein_coding	TRUE	ABLIM1
chr10	cg18680346	ENSG00000099204	rs11196819	ABLIM1	-29.1667	5.63566	2.27438e-07	0.952099	protein_coding	TRUE	ABLIM1
chr10	cg27642528	ENSG00000122376	rs10887688	FAM35A	-11.8563	1.66217	9.81552e-13	0.952038	protein_coding	TRUE	FAM35A
chr10	cg01217608	ENSG00000271335	rs71033392	RP11-324I22.4	4.52199	0.914557	7.63527e-07	0.930016	antisense	TRUE	RP11-324I22.4
chr10	cg01449818	ENSG00000099204	rs11196819	ABLIM1	-107.661	20.791	2.2398e-07	0.929265	protein_coding	TRUE	ABLIM1
chr10	cg26760942	ENSG00000099204	rs1109267	ABLIM1	-85.0948	16.8433	4.3684e-07	0.88485	protein_coding	TRUE	ABLIM1
chr10	cg17673495	ENSG00000198964	rs10508930	SGMS1	-47.6871	7.48232	1.84997e-10	0.878282	protein_coding	TRUE	SGMS1
chr10	cg06769992	ENSG00000099204	rs11196819	ABLIM1	-105.015	21.3487	8.69803e-07	0.873042	protein_coding	TRUE	ABLIM1
chr10	cg15294435	ENSG00000099204	rs11196819	ABLIM1	-54.8229	9.94926	3.58329e-08	0.869761	protein_coding	TRUE	ABLIM1
chr10	cg18574731	ENSG00000099204	rs11196819	ABLIM1	-127.885	25.8549	7.56567e-07	0.865164	protein_coding	TRUE	ABLIM1
chr10	cg21050356	ENSG00000099204	rs11196819	ABLIM1	-63.5732	11.9859	1.13299e-07	0.843168	protein_coding	TRUE	ABLIM1
chr10	cg12736146	ENSG00000099204	rs11196819	ABLIM1	-58.2752	10.7842	6.52658e-08	0.840122	protein_coding	TRUE	ABLIM1
chr10	cg04970100	ENSG00000166033	rs4752700	HTRA1	-63.8171	11.4958	2.83493e-08	0.830425	protein_coding	TRUE	HTRA1
chr10	cg03223072	ENSG00000099204	rs11599283	ABLIM1	-103.941	20.1611	2.52948e-07	0.817359	protein_coding	TRUE	ABLIM1
chr10	cg20832054	ENSG00000271335	rs11599669	RP11-324I22.4	1.49658	0.192667	7.99191e-15	0.767652	antisense	TRUE	RP11-324I22.4
chr10	cg18675610	ENSG00000165322	rs144466157	ARHGAP12	-19.9258	1.91384	2.19839e-25	0.758987	protein_coding	TRUE	ARHGAP12
chr10	cg06004637	ENSG00000165322	rs2808051	ARHGAP12	-72.3224	12.8132	1.658e-08	0.755446	protein_coding	TRUE	ARHGAP12
chr10	cg20218110	ENSG00000099204	rs11594779	ABLIM1	-81.2777	15.4832	1.52573e-07	0.737275	protein_coding	TRUE	ABLIM1
chr10	cg16466810	ENSG00000166033	rs4237540	HTRA1	-73.0483	12.2664	2.59843e-09	0.733313	protein_coding	TRUE	HTRA1
chr10	cg06241170	ENSG00000166033	rs4752700	HTRA1	-127.311	25.9422	9.22537e-07	0.694771	protein_coding	TRUE	HTRA1
chr10	cg01315572	ENSG00000099204	rs11599283	ABLIM1	-43.4605	8.1588	9.9944e-08	0.669046	protein_coding	TRUE	ABLIM1
chr10	cg26784012	ENSG00000165322	rs2799017	ARHGAP12	-21.0616	1.95279	4.03423e-27	0.622379	protein_coding	TRUE	ARHGAP12
chr10	cg22706007	ENSG00000165322	rs2859755	ARHGAP12	-49.4574	7.93219	4.51712e-10	0.593884	protein_coding	TRUE	ARHGAP12
chr10	cg08587685	ENSG00000099204	rs11196819	ABLIM1	-74.165	14.4834	3.0444e-07	0.582891	protein_coding	TRUE	ABLIM1
chr10	cg13133883	ENSG00000148604	rs6585849	RGR	-295.847	57.1587	2.2683e-07	0.492989	protein_coding	TRUE	RGR
chr10	cg15657225	ENSG00000120594	rs379242	PLXDC2	216.617	28.0532	1.14811e-14	0.469044	protein_coding	TRUE	PLXDC2
chr10	cg07534516	ENSG00000120594	rs2478143	PLXDC2	-73.1529	7.28521	1.00345e-23	0.444703	protein_coding	TRUE	PLXDC2
chr10	cg04781305	ENSG00000271335	rs3003981	RP11-324I22.4	-1.54743	0.175982	1.45512e-18	0.33826	antisense	TRUE	RP11-324I22.4
chr10	cg24037270	ENSG00000198964	rs10508930	SGMS1	-22.0051	2.91904	4.75506e-14	0.236318	protein_coding	TRUE	SGMS1
chr10	cg12723985	ENSG00000120594	rs16919374	PLXDC2	-115.127	14.8206	7.97093e-15	0.158656	protein_coding	TRUE	PLXDC2
chr10	cg03631457	ENSG00000120594	rs2481935	PLXDC2	-133.457	20.2694	4.57449e-11	0.124362	protein_coding	TRUE	PLXDC2
chr10	cg20014988	ENSG00000198964	rs10508930	SGMS1	-32.4375	4.45268	3.21807e-13	0.120832	protein_coding	TRUE	SGMS1
chr10	cg00936935	ENSG00000198964	rs10826171	SGMS1	-30.9237	4.67749	3.81276e-11	0.120579	protein_coding	TRUE	SGMS1
chr10	cg09726879	ENSG00000197746	rs74980167	PSAP	-169.543	23.4686	5.03918e-13	0.107021	protein_coding	TRUE	PSAP
chr10	cg08363235	ENSG00000198964	rs10508930	SGMS1	-19.1134	2.36144	5.77577e-16	0.104695	protein_coding	TRUE	SGMS1
chr10	cg14024017	ENSG00000120594	rs16919374	PLXDC2	-106.205	13.1267	5.92674e-16	0.0940008	protein_coding	TRUE	PLXDC2
chr10	cg13196796	ENSG00000171160	rs11189298	MORN4	-7.09164	1.11152	1.76943e-10	0.0795098	protein_coding	TRUE	MORN4
chr10	cg17288694	ENSG00000232656	rs11250244	IDI2-AS1	3.84813	0.575786	2.33686e-11	0.0772655	antisense	TRUE	IDI2-AS1
chr10	cg00168459	ENSG00000198964	rs10508930	SGMS1	-30.8555	4.53863	1.05777e-11	0.0704047	protein_coding	TRUE	SGMS1
chr10	cg03898108	ENSG00000120594	rs7908024	PLXDC2	-128.363	17.1952	8.32596e-14	0.0621245	protein_coding	TRUE	PLXDC2
chr10	cg05102856	ENSG00000198964	rs10508930	SGMS1	-37.2391	6.33166	4.06798e-09	0.0502279	protein_coding	TRUE	SGMS1
chr11	cg27610672	ENSG00000110436	rs1173923	SLC1A2	-69.8102	12.9713	7.37016e-08	0.997625	protein_coding	TRUE	SLC1A2
chr11	cg07358852	ENSG00000110436	rs1173923	SLC1A2	-82.0753	15.6411	1.54264e-07	0.986968	protein_coding	TRUE	SLC1A2
chr11	cg14479638	ENSG00000110436	rs7767	SLC1A2	-69.031	12.5733	4.0134e-08	0.984047	protein_coding	TRUE	SLC1A2
chr11	cg09612920	ENSG00000023171	rs2846310	GRAMD1B	-192.109	36.9505	2.00275e-07	0.900727	protein_coding	TRUE	GRAMD1B
chr11	cg19038246	ENSG00000023171	rs4936820	GRAMD1B	-99.2886	20.0416	7.26577e-07	0.656753	protein_coding	TRUE	GRAMD1B
chr11	cg21871670	ENSG00000167987	rs614872	VPS37C	124.799	24.0116	2.02055e-07	0.648465	protein_coding	TRUE	VPS37C
chr11	cg20584555	ENSG00000167995	rs2668899	BEST1	-9.48342	0.881903	5.71439e-27	0.648351	protein_coding	TRUE	BEST1
chr11	cg23584647	ENSG00000167995	rs2736595	BEST1	-39.1954	5.17895	3.78395e-14	0.631627	protein_coding	TRUE	BEST1
chr11	cg22892043	ENSG00000167995	rs2524294	BEST1	-42.8016	8.46449	4.26764e-07	0.62301	protein_coding	TRUE	BEST1
chr11	cg12728690	ENSG00000023171	rs2846310	GRAMD1B	-127.981	25.0388	3.19935e-07	0.59576	protein_coding	TRUE	GRAMD1B
chr11	cg24961445	ENSG00000023171	rs17127435	GRAMD1B	-144.313	28.5847	4.45023e-07	0.595681	protein_coding	TRUE	GRAMD1B
chr11	cg05861348	ENSG00000165905	rs56148819	LARGE2	-2.97022	0.527848	1.8333e-08	0.572628	protein_coding	TRUE	LARGE2
chr11	cg11562596	ENSG00000167995	rs2524294	BEST1	-8.14462	0.757647	5.9333e-27	0.539837	protein_coding	TRUE	BEST1
chr11	cg05481452	ENSG00000167995	rs2668899	BEST1	-10.1167	0.982201	7.04167e-25	0.523218	protein_coding	TRUE	BEST1
chr11	cg23350132	ENSG00000110514	rs10501320	MADD	-98.2178	17.1636	1.05005e-08	0.368961	protein_coding	TRUE	MADD
chr11	cg12841566	ENSG00000110514	rs10501320	MADD	-65.8257	10.8151	1.15443e-09	0.357349	protein_coding	TRUE	MADD
chr11	cg13709043	ENSG00000023171	rs4936820	GRAMD1B	-84.1549	16.7526	5.07652e-07	0.353694	protein_coding	TRUE	GRAMD1B
chr11	cg24944820	ENSG00000167995	rs909268	BEST1	61.5278	11.6706	1.34913e-07	0.31041	protein_coding	TRUE	BEST1
chr11	cg07800325	ENSG00000167995	rs909268	BEST1	45.4536	9.04693	5.05524e-07	0.281691	protein_coding	TRUE	BEST1
chr11	cg15456821	ENSG00000167995	rs2727272	BEST1	-19.629	2.36873	1.16419e-16	0.233915	protein_coding	TRUE	BEST1
chr11	cg24204282	ENSG00000165905	rs56148819	LARGE2	-3.01905	0.557604	6.15225e-08	0.20814	protein_coding	TRUE	LARGE2
chr11	cg27221977	ENSG00000110514	rs10501320	MADD	-115.792	22.6711	3.26507e-07	0.159741	protein_coding	TRUE	MADD
chr11	cg26145333	ENSG00000256269	rs17075	HMBS	-47.9253	9.36462	3.09298e-07	0.119246	protein_coding	TRUE	HMBS
chr11	cg11367048	ENSG00000256269	rs17075	HMBS	-12.4584	1.39469	4.15777e-19	0.0865885	protein_coding	TRUE	HMBS
chr12	cg22844555	ENSG00000072609	rs146419925	CHFR	8.58371	1.31074	5.80236e-11	0.997615	protein_coding	TRUE	CHFR
chr12	cg16120883	ENSG00000072609	rs146419925	CHFR	4.7555	0.687665	4.66437e-12	0.996613	protein_coding	TRUE	CHFR
chr12	cg26392922	ENSG00000139725	rs712852	RHOF	-2.03756	0.332747	9.15733e-10	0.984885	protein_coding	TRUE	RHOF
chr12	cg20765580	ENSG00000072609	rs146419925	CHFR	6.14416	0.853985	6.26046e-13	0.984539	protein_coding	TRUE	CHFR
chr12	cg15108326	ENSG00000072609	rs146419925	CHFR	9.20168	1.69379	5.55433e-08	0.984306	protein_coding	TRUE	CHFR
chr12	cg13046214	ENSG00000072609	rs146419925	CHFR	3.66025	0.49468	1.36978e-13	0.977524	protein_coding	TRUE	CHFR
chr12	cg19837214	ENSG00000072609	rs61952781	CHFR	8.19012	1.19388	6.88219e-12	0.972073	protein_coding	TRUE	CHFR
chr12	cg03425615	ENSG00000090615	rs61952781	GOLGA3	-46.3911	5.77369	9.36522e-16	0.959657	protein_coding	TRUE	GOLGA3
chr12	cg09537870	ENSG00000090615	rs72624274	GOLGA3	-46.4402	5.39617	7.55624e-18	0.943775	protein_coding	TRUE	GOLGA3
chr12	cg03425615	ENSG00000072609	rs61952781	CHFR	3.85139	0.492858	5.52255e-15	0.933496	protein_coding	TRUE	CHFR
chr12	cg08695912	ENSG00000072609	rs72624274	CHFR	4.57417	0.607214	4.95705e-14	0.926487	protein_coding	TRUE	CHFR
chr12	cg23058246	ENSG00000072609	rs61952781	CHFR	3.78387	0.482789	4.59522e-15	0.922406	protein_coding	TRUE	CHFR
chr12	cg14903202	ENSG00000072609	rs146419925	CHFR	8.82733	1.4715	1.98703e-09	0.907774	protein_coding	TRUE	CHFR
chr12	cg08424446	ENSG00000072609	rs72624274	CHFR	5.4479	0.853846	1.76598e-10	0.895346	protein_coding	TRUE	CHFR
chr12	cg16120883	ENSG00000090615	rs146419925	GOLGA3	-52.5649	7.83096	1.9139e-11	0.87992	protein_coding	TRUE	GOLGA3
chr12	cg08695912	ENSG00000090615	rs72624274	GOLGA3	-55.0934	7.12748	1.07787e-14	0.878162	protein_coding	TRUE	GOLGA3
chr12	cg02243221	ENSG00000090615	rs72624274	GOLGA3	-46.3191	5.55951	7.98181e-17	0.869095	protein_coding	TRUE	GOLGA3
chr12	cg20765580	ENSG00000090615	rs146419925	GOLGA3	-67.9144	9.74812	3.23956e-12	0.867473	protein_coding	TRUE	GOLGA3
chr12	cg27523351	ENSG00000256875	rs12301509	RP11-503G7.2	-26.4337	4.7413	2.47245e-08	0.836138	lincRNA	TRUE	RP11-503G7.2
chr12	cg22149555	ENSG00000090615	rs72624274	GOLGA3	-52.8285	6.34546	8.40343e-17	0.82746	protein_coding	TRUE	GOLGA3
chr12	cg13046214	ENSG00000090615	rs146419925	GOLGA3	-40.4585	5.65684	8.54309e-13	0.820387	protein_coding	TRUE	GOLGA3
chr12	cg23058246	ENSG00000090615	rs61952781	GOLGA3	-45.5778	5.65478	7.62657e-16	0.819238	protein_coding	TRUE	GOLGA3
chr12	cg19837214	ENSG00000090615	rs61952781	GOLGA3	-98.6523	14.0775	2.42066e-12	0.812456	protein_coding	TRUE	GOLGA3
chr12	cg14949892	ENSG00000090615	rs74721187	GOLGA3	-82.7083	15.479	9.12938e-08	0.781909	protein_coding	TRUE	GOLGA3
chr12	cg14949892	ENSG00000072609	rs74721187	CHFR	6.80498	1.30061	1.67545e-07	0.776809	protein_coding	TRUE	CHFR
chr12	cg22149555	ENSG00000072609	rs72624274	CHFR	4.38613	0.54276	6.41547e-16	0.775584	protein_coding	TRUE	CHFR
chr12	cg08424446	ENSG00000090615	rs72624274	GOLGA3	-65.617	10.0971	8.10659e-11	0.766577	protein_coding	TRUE	GOLGA3
chr12	cg07052262	ENSG00000090615	rs10781656	GOLGA3	-68.5587	9.32251	1.92212e-13	0.764665	protein_coding	TRUE	GOLGA3
chr12	cg09537870	ENSG00000072609	rs72624274	CHFR	3.85574	0.462477	7.61117e-17	0.762049	protein_coding	TRUE	CHFR
chr12	cg16020270	ENSG00000090615	rs72624274	GOLGA3	-58.4709	7.06009	1.21234e-16	0.728521	protein_coding	TRUE	GOLGA3
chr12	cg27523351	ENSG00000256783	rs12301509	RP11-503G7.1	-14.1778	2.61839	6.13966e-08	0.719916	lincRNA	TRUE	RP11-503G7.1
chr12	cg05614952	ENSG00000090615	rs61952781	GOLGA3	-39.5809	4.81495	2.02794e-16	0.71389	protein_coding	TRUE	GOLGA3
chr12	cg16214937	ENSG00000072609	rs10781656	CHFR	7.68814	1.25694	9.56096e-10	0.711436	protein_coding	TRUE	CHFR
chr12	cg07052262	ENSG00000072609	rs10781656	CHFR	5.69117	0.792272	6.80231e-13	0.708498	protein_coding	TRUE	CHFR
chr12	cg22844555	ENSG00000090615	rs146419925	GOLGA3	-94.8799	14.8818	1.82268e-10	0.657663	protein_coding	TRUE	GOLGA3
chr12	cg23470262	ENSG00000090615	rs72624274	GOLGA3	-55.4046	6.84038	5.51241e-16	0.655887	protein_coding	TRUE	GOLGA3
chr12	cg16300310	ENSG00000090615	rs957800	GOLGA3	-113.14	22.1914	3.42546e-07	0.635815	protein_coding	TRUE	GOLGA3
chr12	cg16214937	ENSG00000090615	rs10781656	GOLGA3	-92.6152	14.8876	4.94126e-10	0.619836	protein_coding	TRUE	GOLGA3
chr12	cg02243221	ENSG00000072609	rs72624274	CHFR	3.84568	0.475554	6.12871e-16	0.60794	protein_coding	TRUE	CHFR
chr12	cg16300310	ENSG00000072609	rs957800	CHFR	8.97175	1.81556	7.74938e-07	0.590935	protein_coding	TRUE	CHFR
chr12	cg10388270	ENSG00000090615	rs72624274	GOLGA3	-41.8265	4.97961	4.48175e-17	0.583214	protein_coding	TRUE	GOLGA3
chr12	cg05614952	ENSG00000072609	rs61952781	CHFR	3.28601	0.411537	1.40825e-15	0.553055	protein_coding	TRUE	CHFR
chr12	cg15108326	ENSG00000090615	rs146419925	GOLGA3	-101.711	19.0737	9.68678e-08	0.545827	protein_coding	TRUE	GOLGA3
chr12	cg16020270	ENSG00000072609	rs72624274	CHFR	4.85459	0.603705	8.88641e-16	0.537414	protein_coding	TRUE	CHFR
chr12	cg23521905	ENSG00000279500	rs4760537	RP11-21K12.2	-1.587	0.32245	8.58036e-07	0.487185	TEC	TRUE	RP11-21K12.2
chr12	cg14903202	ENSG00000090615	rs146419925	GOLGA3	-97.5728	16.6367	4.49361e-09	0.415638	protein_coding	TRUE	GOLGA3
chr12	cg22134853	ENSG00000060138	rs11053915	YBX3	-270.122	51.1814	1.30786e-07	0.281815	protein_coding	TRUE	YBX3
chr12	cg23470262	ENSG00000072609	rs72624274	CHFR	4.60001	0.584188	3.42954e-15	0.264578	protein_coding	TRUE	CHFR
chr12	cg10388270	ENSG00000072609	rs72624274	CHFR	3.47268	0.426152	3.6722e-16	0.218748	protein_coding	TRUE	CHFR
chr12	cg16697799	ENSG00000051825	rs143989762	MPHOSPH9	25.3419	4.03434	3.3518e-10	0.185487	protein_coding	TRUE	MPHOSPH9
chr12	cg03538318	ENSG00000090615	rs55706161	GOLGA3	-69.643	11.6155	2.02587e-09	0.121493	protein_coding	TRUE	GOLGA3
chr12	cg01030110	ENSG00000051825	rs7975763	MPHOSPH9	35.3603	4.79711	1.69135e-13	0.0993623	protein_coding	TRUE	MPHOSPH9
chr12	cg03538318	ENSG00000072609	rs55706161	CHFR	5.50737	0.968393	1.29194e-08	0.0795175	protein_coding	TRUE	CHFR
chr12	cg21224286	ENSG00000151062	rs6489330	CACNA2D4	-93.2137	17.3423	7.66076e-08	0.070794	protein_coding	TRUE	CACNA2D4
chr12	cg18946787	ENSG00000256875	rs4883583	RP11-503G7.2	-5.58396	0.867535	1.22194e-10	0.0643544	lincRNA	TRUE	RP11-503G7.2
chr13	cg01313259	ENSG00000102606	rs9515381	ARHGEF7	-36.2974	5.68338	1.69632e-10	0.799477	protein_coding	TRUE	ARHGEF7
chr13	cg02071074	ENSG00000253710	rs73184330	ALG11	5.22792	0.928114	1.77264e-08	0.762969	protein_coding	TRUE	ALG11
chr13	cg20399252	ENSG00000123179	rs7983905	EBPL	-3.16034	0.605383	1.78541e-07	0.722985	protein_coding	TRUE	EBPL
chr13	cg17351439	ENSG00000183098	rs5805796	GPC6	-12.5754	1.75503	7.76088e-13	0.625053	protein_coding	TRUE	GPC6
chr13	cg06646332	ENSG00000102606	rs7983454	ARHGEF7	-36.8622	7.38245	5.93805e-07	0.580311	protein_coding	TRUE	ARHGEF7
chr13	cg08005604	ENSG00000136141	rs28489097	LRCH1	-7.64997	1.02431	8.11776e-14	0.567808	protein_coding	TRUE	LRCH1
chr13	cg02305431	ENSG00000127870	rs3834505	RNF6	-23.9476	4.6489	2.58782e-07	0.502007	protein_coding	TRUE	RNF6
chr13	cg17351439	ENSG00000278177	rs5805796	RP11-632L2.2	-0.518374	0.089205	6.20829e-09	0.292566	antisense	TRUE	RP11-632L2.2
chr13	cg21980364	ENSG00000102606	rs4771737	ARHGEF7	34.6528	6.7685	3.05984e-07	0.262875	protein_coding	TRUE	ARHGEF7
chr13	cg26112799	ENSG00000102606	rs7982732	ARHGEF7	-33.5498	4.62806	4.19217e-13	0.250662	protein_coding	TRUE	ARHGEF7
chr13	cg08520986	ENSG00000172915	rs7332116	NBEA	-46.205	9.28313	6.44756e-07	0.243296	protein_coding	TRUE	NBEA
chr13	cg03658251	ENSG00000123179	rs7983905	EBPL	-2.31911	0.341461	1.10791e-11	0.233637	protein_coding	TRUE	EBPL
chr13	cg08025802	ENSG00000102606	rs9522161	ARHGEF7	-32.771	6.42056	3.32433e-07	0.143994	protein_coding	TRUE	ARHGEF7
chr13	cg16645705	ENSG00000102606	rs4771737	ARHGEF7	36.6017	6.34482	7.98588e-09	0.118234	protein_coding	TRUE	ARHGEF7
chr13	cg04663916	ENSG00000123179	rs7983905	EBPL	-1.76529	0.257658	7.31796e-12	0.0779031	protein_coding	TRUE	EBPL
chr13	cg17440241	ENSG00000132970	rs12867025	WASF3	-30.2153	5.5715	5.85467e-08	0.056791	protein_coding	TRUE	WASF3
chr14	cg25006823	ENSG00000198133	rs7144333	TMEM229B	-12.1057	2.28134	1.11798e-07	0.883157	protein_coding	TRUE	TMEM229B
chr14	cg25786405	ENSG00000198133	rs10134444	TMEM229B	-10.263	2.02169	3.84492e-07	0.841736	protein_coding	TRUE	TMEM229B
chr14	cg24130564	ENSG00000126214	rs35015260	KLC1	23.2151	4.26313	5.1644e-08	0.84159	protein_coding	TRUE	KLC1
chr14	cg11479689	ENSG00000100884	rs12888763	CPNE6	4.17964	0.829606	4.70162e-07	0.613986	protein_coding	TRUE	CPNE6
chr14	cg01811583	ENSG00000066629	rs11625037	EML1	-33.4504	6.35214	1.39432e-07	0.547568	protein_coding	TRUE	EML1
chr14	cg26180015	ENSG00000066629	rs11625037	EML1	-17.7103	3.09349	1.03424e-08	0.474729	protein_coding	TRUE	EML1
chr14	cg08669673	ENSG00000066629	rs11625037	EML1	-21.8654	4.05264	6.83871e-08	0.447352	protein_coding	TRUE	EML1
chr14	cg08778580	ENSG00000198133	rs1555399	TMEM229B	-12.7816	2.15023	2.77676e-09	0.425157	protein_coding	TRUE	TMEM229B
chr14	cg02772825	ENSG00000198133	rs1555399	TMEM229B	-7.25414	1.11715	8.39008e-11	0.387776	protein_coding	TRUE	TMEM229B
chr14	cg23112188	ENSG00000100884	rs12888763	CPNE6	4.71855	0.877897	7.66522e-08	0.267415	protein_coding	TRUE	CPNE6
chr14	cg13725826	ENSG00000066629	rs11625037	EML1	-21.7071	4.24061	3.07379e-07	0.22636	protein_coding	TRUE	EML1
chr14	cg22775413	ENSG00000100884	rs11847138	CPNE6	5.45518	1.05245	2.17976e-07	0.171092	protein_coding	TRUE	CPNE6
chr14	cg00524400	ENSG00000100884	rs3561	CPNE6	4.21849	0.765523	3.57628e-08	0.145537	protein_coding	TRUE	CPNE6
chr14	cg05715076	ENSG00000247970	rs2022745	RP11-543C4.1	0.130326	0.0251097	2.09996e-07	0.122515	lincRNA	TRUE	RP11-543C4.1
chr14	cg21807240	ENSG00000279656	rs12590429	RP11-298I3.6	2.90467	0.528958	3.98972e-08	0.083861	TEC	TRUE	RP11-298I3.6
chr15	cg11829253	ENSG00000140391	rs34443712	TSPAN3	68.9187	9.17256	5.75346e-14	0.94633	protein_coding	TRUE	TSPAN3
chr15	cg16104837	ENSG00000140391	rs62007217	TSPAN3	73.5307	9.61819	2.09004e-14	0.918837	protein_coding	TRUE	TSPAN3
chr15	cg14110457	ENSG00000171914	rs2439718	TLN2	-40.6455	6.91845	4.22977e-09	0.777272	protein_coding	TRUE	TLN2
chr15	cg09192711	ENSG00000140391	rs11630497	TSPAN3	109.822	15.2177	5.32411e-13	0.701806	protein_coding	TRUE	TSPAN3
chr15	cg05046814	ENSG00000140391	rs12912792	TSPAN3	72.1078	11.314	1.84946e-10	0.683104	protein_coding	TRUE	TSPAN3
chr15	cg13958176	ENSG00000173517	rs17466480	PEAK1	88.9634	16.229	4.21158e-08	0.621436	protein_coding	TRUE	PEAK1
chr15	cg01956614	ENSG00000171914	rs2439718	TLN2	-47.6967	9.07648	1.48041e-07	0.547447	protein_coding	TRUE	TLN2
chr15	cg26710563	ENSG00000171914	rs56083775	TLN2	-39.5754	5.8528	1.36303e-11	0.514534	protein_coding	TRUE	TLN2
chr15	cg09192711	ENSG00000173517	rs33931897	PEAK1	68.1246	13.7749	7.59221e-07	0.386923	protein_coding	TRUE	PEAK1
chr15	cg05142942	ENSG00000140391	rs12912792	TSPAN3	120.668	22.4028	7.19369e-08	0.27701	protein_coding	TRUE	TSPAN3
chr15	cg23627990	ENSG00000140391	rs62007217	TSPAN3	-90.9484	16.9978	8.76688e-08	0.206141	protein_coding	TRUE	TSPAN3
chr15	cg09265959	ENSG00000166128	rs1017546	RAB8B	-8.5571	1.60786	1.02605e-07	0.140019	protein_coding	TRUE	RAB8B
chr16	cg02552868	ENSG00000140941	rs8059409	MAP1LC3B	27.4797	5.46185	4.87405e-07	0.990405	protein_coding	TRUE	MAP1LC3B
chr16	cg02552868	ENSG00000103264	rs8059409	FBXO31	-31.5874	4.82881	6.09283e-11	0.966922	protein_coding	TRUE	FBXO31
chr16	cg02626269	ENSG00000140941	rs8059409	MAP1LC3B	35.7362	6.82548	1.64356e-07	0.956406	protein_coding	TRUE	MAP1LC3B
chr16	cg05259094	ENSG00000140941	rs8059409	MAP1LC3B	18.2213	3.40096	8.42936e-08	0.823167	protein_coding	TRUE	MAP1LC3B
chr16	cg02626269	ENSG00000103264	rs8059409	FBXO31	-41.078	5.85904	2.36541e-12	0.8079	protein_coding	TRUE	FBXO31
chr16	cg26593722	ENSG00000140941	rs8059409	MAP1LC3B	28.6397	5.15703	2.79967e-08	0.775765	protein_coding	TRUE	MAP1LC3B
chr16	cg06654782	ENSG00000103264	rs8059409	FBXO31	-63.2545	11.1257	1.3046e-08	0.656782	protein_coding	TRUE	FBXO31
chr16	cg04872075	ENSG00000140941	rs8059409	MAP1LC3B	23.4681	4.47955	1.61507e-07	0.546453	protein_coding	TRUE	MAP1LC3B
chr16	cg03623401	ENSG00000234719	rs8050827	RP11-166B2.1	18.4827	3.33025	2.85766e-08	0.453579	protein_coding	TRUE	RP11-166B2.1
chr16	cg26593722	ENSG00000103264	rs8059409	FBXO31	-32.9207	4.2015	4.67068e-15	0.424761	protein_coding	TRUE	FBXO31
chr16	cg05259094	ENSG00000103264	rs8059409	FBXO31	-20.945	2.86431	2.62429e-13	0.40168	protein_coding	TRUE	FBXO31
chr16	cg03082108	ENSG00000234719	rs2869492	RP11-166B2.1	-20.876	2.68503	7.54617e-15	0.230169	protein_coding	TRUE	RP11-166B2.1
chr16	cg04872075	ENSG00000103264	rs8059409	FBXO31	-26.9761	3.8434	2.23776e-12	0.131261	protein_coding	TRUE	FBXO31
chr16	cg20873866	ENSG00000205078	rs11644633	SYCE1L	2.97638	0.569907	1.76462e-07	0.112468	protein_coding	TRUE	SYCE1L
chr16	cg08491150	ENSG00000205078	rs17769245	SYCE1L	3.55176	0.701366	4.10433e-07	0.0727567	protein_coding	TRUE	SYCE1L
chr17	cg27546012	ENSG00000070495	rs9914041	JMJD6	-53.037	10.7156	7.44022e-07	0.97184	protein_coding	TRUE	JMJD6
chr17	cg16177647	ENSG00000136448	rs9748204	NMT1	33.0541	6.65455	6.79459e-07	0.907686	protein_coding	TRUE	NMT1
chr17	cg10360323	ENSG00000279602	rs1842146	CTD-3014M21.1	-1.21211	0.191012	2.21373e-10	0.8698	TEC	TRUE	CTD-3014M21.1
chr17	cg24321297	ENSG00000070731	rs16967307	ST6GALNAC2	-52.1803	6.35214	2.12883e-16	0.811906	protein_coding	TRUE	ST6GALNAC2
chr17	cg05817667	ENSG00000261873	rs2036670	RP11-515E23.1	-17.8286	2.98766	2.41054e-09	0.763815	protein_coding	TRUE	RP11-515E23.1
chr17	cg12204149	ENSG00000136448	rs9748204	NMT1	21.5838	3.93105	4.00619e-08	0.762271	protein_coding	TRUE	NMT1
chr17	cg00693004	ENSG00000172992	rs59246405	DCAKD	-8.08127	1.56735	2.52273e-07	0.756565	protein_coding	TRUE	DCAKD
chr17	cg20390283	ENSG00000136448	rs112106588	NMT1	21.0136	3.71688	1.57165e-08	0.740551	protein_coding	TRUE	NMT1
chr17	cg20503109	ENSG00000070731	rs16967307	ST6GALNAC2	-80.8372	14.2364	1.3611e-08	0.734965	protein_coding	TRUE	ST6GALNAC2
chr17	cg14243899	ENSG00000070731	rs16967307	ST6GALNAC2	-24.2425	2.69477	2.33787e-19	0.707985	protein_coding	TRUE	ST6GALNAC2
chr17	cg19439071	ENSG00000070731	rs34207189	ST6GALNAC2	-62.1559	9.9291	3.85061e-10	0.69729	protein_coding	TRUE	ST6GALNAC2
chr17	cg24569276	ENSG00000087111	rs2286519	PIGS	-65.4599	10.1006	9.12447e-11	0.696282	protein_coding	TRUE	PIGS
chr17	cg13672501	ENSG00000221995	rs1472081	TIAF1	15.2678	3.05187	5.65103e-07	0.68381	protein_coding	TRUE	TIAF1
chr17	cg21472184	ENSG00000136448	rs12601574	NMT1	13.782	2.08385	3.74787e-11	0.667247	protein_coding	TRUE	NMT1
chr17	cg09146262	ENSG00000087111	rs2286519	PIGS	-133.27	23.0661	7.57109e-09	0.623848	protein_coding	TRUE	PIGS
chr17	cg26730025	ENSG00000136448	rs62065829	NMT1	16.872	2.66621	2.48242e-10	0.621986	protein_coding	TRUE	NMT1
chr17	cg22579017	ENSG00000087111	rs2286519	PIGS	-32.7766	3.17115	4.84932e-25	0.568108	protein_coding	TRUE	PIGS
chr17	cg11114275	ENSG00000221995	rs7207255	TIAF1	-10.1256	2.01511	5.03778e-07	0.537453	protein_coding	TRUE	TIAF1
chr17	cg06263341	ENSG00000267665	rs35281353	RP11-13K12.2	-17.9637	3.03974	3.4289e-09	0.535238	lincRNA	TRUE	RP11-13K12.2
chr17	cg13664588	ENSG00000070731	rs34207189	ST6GALNAC2	-84.5266	13.2768	1.93418e-10	0.521704	protein_coding	TRUE	ST6GALNAC2
chr17	cg19974715	ENSG00000267665	rs12952105	RP11-13K12.2	-12.5781	2.27767	3.34439e-08	0.508401	lincRNA	TRUE	RP11-13K12.2
chr17	cg16548154	ENSG00000070731	rs16967307	ST6GALNAC2	-60.8564	7.85504	9.37685e-15	0.500628	protein_coding	TRUE	ST6GALNAC2
chr17	cg10914865	ENSG00000262877	rs1701	RP11-1055B8.4	-28.8725	5.79029	6.15255e-07	0.47467	lincRNA	TRUE	RP11-1055B8.4
chr17	cg12681669	ENSG00000087111	rs2286519	PIGS	-27.5614	2.39948	1.54426e-30	0.462853	protein_coding	TRUE	PIGS
chr17	cg08106445	ENSG00000262877	rs1701	RP11-1055B8.4	-38.095	7.1796	1.12058e-07	0.438113	lincRNA	TRUE	RP11-1055B8.4
chr17	cg08216426	ENSG00000136448	rs62065829	NMT1	17.9117	2.83648	2.70553e-10	0.430807	protein_coding	TRUE	NMT1
chr17	cg20832875	ENSG00000070495	rs7212823	JMJD6	-19.9038	3.56875	2.44343e-08	0.408939	protein_coding	TRUE	JMJD6
chr17	cg20207911	ENSG00000109047	rs17682036	RCVRN	1709.58	292.147	4.86357e-09	0.404489	protein_coding	TRUE	RCVRN
chr17	cg20961037	ENSG00000172992	rs12950988	DCAKD	-59.691	12.049	7.27011e-07	0.402398	protein_coding	TRUE	DCAKD
chr17	cg16177647	ENSG00000172992	rs9748204	DCAKD	-22.1138	3.87384	1.13974e-08	0.372657	protein_coding	TRUE	DCAKD
chr17	cg15119650	ENSG00000266709	rs7223809	RP11-214O1.2	1.32227	0.204046	9.15876e-11	0.355889	lincRNA	TRUE	RP11-214O1.2
chr17	cg05778709	ENSG00000261873	rs1039768	RP11-515E23.1	21.5794	3.90612	3.30428e-08	0.355493	protein_coding	TRUE	RP11-515E23.1
chr17	cg27370759	ENSG00000087111	rs2286519	PIGS	-28.0807	2.54348	2.44226e-28	0.310047	protein_coding	TRUE	PIGS
chr17	cg23004409	ENSG00000172992	rs12950988	DCAKD	-15.7832	2.40165	4.9704e-11	0.279587	protein_coding	TRUE	DCAKD
chr17	cg05444541	ENSG00000175662	rs8076747	TOM1L2	28.3169	4.62526	9.22804e-10	0.264165	protein_coding	TRUE	TOM1L2
chr17	cg24253367	ENSG00000087111	rs633274	PIGS	-96.4558	17.2638	2.30812e-08	0.263522	protein_coding	TRUE	PIGS
chr17	cg09076584	ENSG00000087111	rs633274	PIGS	-94.2275	15.8883	3.01782e-09	0.203812	protein_coding	TRUE	PIGS
chr17	cg16905754	ENSG00000070731	rs34207189	ST6GALNAC2	-82.5109	16.3372	4.40705e-07	0.183928	protein_coding	TRUE	ST6GALNAC2
chr17	cg22579017	ENSG00000258472	rs2286519	RP11-192H23.4	-1.70462	0.288487	3.44534e-09	0.150778	protein_coding	TRUE	RP11-192H23.4
chr17	cg05253759	ENSG00000087111	rs633274	PIGS	-85.5087	14.2686	2.06261e-09	0.14687	protein_coding	TRUE	PIGS
chr17	cg06726167	ENSG00000220205	rs8067606	VAMP2	148.184	22.0106	1.66894e-11	0.117633	protein_coding	TRUE	VAMP2
chr17	cg07102235	ENSG00000136448	rs3744474	NMT1	32.5121	6.57927	7.74849e-07	0.117098	protein_coding	TRUE	NMT1
chr17	cg27546012	ENSG00000182534	rs9914041	MXRA7	-255.632	38.4552	2.98021e-11	0.088347	protein_coding	TRUE	MXRA7
chr17	cg22150270	ENSG00000267665	rs112637270	RP11-13K12.2	-23.461	4.56605	2.77466e-07	0.0847088	lincRNA	TRUE	RP11-13K12.2
chr17	cg27370759	ENSG00000258472	rs2286519	RP11-192H23.4	-1.4604	0.242115	1.62087e-09	0.0827378	protein_coding	TRUE	RP11-192H23.4
chr17	cg09791835	ENSG00000087111	rs2286519	PIGS	-70.515	11.6192	1.28853e-09	0.0823375	protein_coding	TRUE	PIGS
chr17	cg21472184	ENSG00000172992	rs12601574	DCAKD	-9.22458	1.05202	1.81109e-18	0.0815661	protein_coding	TRUE	DCAKD
chr17	cg11881146	ENSG00000087111	rs2286519	PIGS	75.5176	14.4602	1.76592e-07	0.0732061	protein_coding	TRUE	PIGS
chr17	cg12681669	ENSG00000258472	rs2286519	RP11-192H23.4	-1.43339	0.23492	1.05001e-09	0.0726755	protein_coding	TRUE	RP11-192H23.4
chr17	cg24612305	ENSG00000175662	rs4471742	TOM1L2	-45.5414	8.84732	2.64004e-07	0.0707974	protein_coding	TRUE	TOM1L2
chr17	cg00528014	ENSG00000087111	rs633274	PIGS	-44.1106	7.45056	3.21069e-09	0.0685191	protein_coding	TRUE	PIGS
chr17	cg20832875	ENSG00000182534	rs7212823	MXRA7	-96.5642	11.3313	1.56989e-17	0.0580889	protein_coding	TRUE	MXRA7
chr18	cg11687085	ENSG00000226742	rs4081876	HSBP1L1	-6.70814	1.3188	3.64652e-07	0.853128	protein_coding	TRUE	HSBP1L1
chr18	cg26552025	ENSG00000166569	rs7228681	CPLX4	26.736	4.67065	1.03888e-08	0.170954	protein_coding	TRUE	CPLX4
chr19	cg09231418	ENSG00000272333	rs77563037	KMT2B	3.89212	0.513744	3.56392e-14	0.968532	protein_coding	TRUE	KMT2B
chr19	cg07040712	ENSG00000269420	rs10417229	PLA2G4C-AS1	-19.1763	2.47512	9.36143e-15	0.745472	antisense	TRUE	PLA2G4C-AS1
chr19	cg15609471	ENSG00000142252	rs3745157	GEMIN7	-1.50601	0.2993	4.85912e-07	0.641454	protein_coding	TRUE	GEMIN7
chr19	cg02380983	ENSG00000269420	rs138853548	PLA2G4C-AS1	-31.72	6.06019	1.65731e-07	0.599568	antisense	TRUE	PLA2G4C-AS1
chr19	cg07040712	ENSG00000105507	rs10417229	CABP5	-277.393	30.1865	3.95371e-20	0.573193	protein_coding	TRUE	CABP5
chr19	cg04937172	ENSG00000269420	rs35439716	PLA2G4C-AS1	-10.3504	1.26055	2.19352e-16	0.453916	antisense	TRUE	PLA2G4C-AS1
chr19	cg23522194	ENSG00000269420	rs138853548	PLA2G4C-AS1	-20.3753	3.6639	2.68068e-08	0.444982	antisense	TRUE	PLA2G4C-AS1
chr19	cg02493364	ENSG00000272333	rs77563037	KMT2B	10.5017	1.57943	2.94947e-11	0.37797	protein_coding	TRUE	KMT2B
chr19	cg09422355	ENSG00000269420	rs10415274	PLA2G4C-AS1	-10.6839	1.27671	5.8476e-17	0.371488	antisense	TRUE	PLA2G4C-AS1
chr19	cg02380983	ENSG00000105507	rs138853548	CABP5	-468.552	83.0819	1.70398e-08	0.290291	protein_coding	TRUE	CABP5
chr19	cg26955996	ENSG00000269420	rs35439716	PLA2G4C-AS1	-9.24672	1.04628	9.76948e-19	0.246824	antisense	TRUE	PLA2G4C-AS1
chr19	cg09422355	ENSG00000105507	rs10415274	CABP5	-157.856	15.0983	1.38727e-25	0.223286	protein_coding	TRUE	CABP5
chr19	cg15920400	ENSG00000105507	rs10417229	CABP5	-306.351	39.8282	1.45062e-14	0.217421	protein_coding	TRUE	CABP5
chr19	cg15920400	ENSG00000269420	rs10417229	PLA2G4C-AS1	-21.1782	3.12114	1.15754e-11	0.215164	antisense	TRUE	PLA2G4C-AS1
chr19	cg19801897	ENSG00000272333	rs107068	KMT2B	-27.8076	5.44134	3.21439e-07	0.175344	protein_coding	TRUE	KMT2B
chr19	cg10149529	ENSG00000105507	rs10416064	CABP5	-250.081	28.5526	1.9767e-18	0.0927821	protein_coding	TRUE	CABP5
chr19	cg10149529	ENSG00000269420	rs10416064	PLA2G4C-AS1	-16.9238	2.28125	1.18308e-13	0.0876298	antisense	TRUE	PLA2G4C-AS1
chr19	cg04937172	ENSG00000105507	rs35439716	CABP5	-149.411	15.0418	2.98914e-23	0.0800795	protein_coding	TRUE	CABP5
chr19	cg05970437	ENSG00000129911	rs10411759	KLF16	13.881	2.22434	4.36119e-10	0.0572981	protein_coding	TRUE	KLF16
chr2	cg25276246	ENSG00000162878	rs4952398	PKDCC	-32.1367	6.10876	1.43463e-07	0.934667	protein_coding	TRUE	PKDCC
chr2	cg07346182	ENSG00000136717	rs749008	BIN1	-70.3928	13.206	9.80271e-08	0.840841	protein_coding	TRUE	BIN1
chr2	cg14436272	ENSG00000171596	rs34693999	NMUR1	-6.53011	0.664589	8.71788e-23	0.788497	protein_coding	TRUE	NMUR1
chr2	cg00143376	ENSG00000171596	rs112143922	NMUR1	-23.0285	3.06594	5.86455e-14	0.766566	protein_coding	TRUE	NMUR1
chr2	cg10034588	ENSG00000171596	rs113387157	NMUR1	-10.5217	1.15638	9.13186e-20	0.738001	protein_coding	TRUE	NMUR1
chr2	cg11538967	ENSG00000136717	rs6720234	BIN1	-50.2286	8.62694	5.80456e-09	0.729063	protein_coding	TRUE	BIN1
chr2	cg07109592	ENSG00000115762	rs11685313	PLEKHB2	18.2397	3.66912	6.65667e-07	0.703603	protein_coding	TRUE	PLEKHB2
chr2	cg13182602	ENSG00000136717	rs35322174	BIN1	-42.5484	7.60993	2.25554e-08	0.604859	protein_coding	TRUE	BIN1
chr2	cg08487618	ENSG00000198648	rs16854955	STK39	-56.8029	9.90988	9.92843e-09	0.551238	protein_coding	TRUE	STK39
chr2	cg22872692	ENSG00000198648	rs3769392	STK39	-86.9231	16.0644	6.27073e-08	0.530223	protein_coding	TRUE	STK39
chr2	cg06091295	ENSG00000136717	rs749008	BIN1	-71.3378	12.4011	8.7922e-09	0.496573	protein_coding	TRUE	BIN1
chr2	cg06425843	ENSG00000136717	rs35322174	BIN1	-70.7936	13.1955	8.09595e-08	0.495004	protein_coding	TRUE	BIN1
chr2	cg07301105	ENSG00000171596	rs2008114	NMUR1	29.5022	5.4419	5.9165e-08	0.448996	protein_coding	TRUE	NMUR1
chr2	cg08795597	ENSG00000198648	rs7569501	STK39	62.8181	10.4518	1.85193e-09	0.446772	protein_coding	TRUE	STK39
chr2	cg26872305	ENSG00000198648	rs6433044	STK39	-45.5953	6.66919	8.1031e-12	0.414044	protein_coding	TRUE	STK39
chr2	cg13431910	ENSG00000136717	rs35322174	BIN1	-58.3987	10.8564	7.48161e-08	0.399293	protein_coding	TRUE	BIN1
chr2	cg03650730	ENSG00000115677	rs12624197	HDLBP	-21.764	3.57016	1.08706e-09	0.381251	protein_coding	TRUE	HDLBP
chr2	cg15482884	ENSG00000221823	rs6731036	PPP3R1	19.8669	3.00923	4.05662e-11	0.362202	protein_coding	TRUE	PPP3R1
chr2	cg24695024	ENSG00000198648	rs11372724	STK39	-35.9424	5.03032	8.98986e-13	0.348253	protein_coding	TRUE	STK39
chr2	cg11775828	ENSG00000198648	rs7569501	STK39	-63.5825	10.4567	1.19748e-09	0.253315	protein_coding	TRUE	STK39
chr2	cg08560184	ENSG00000136717	rs749008	BIN1	-60.412	10.2758	4.12562e-09	0.249597	protein_coding	TRUE	BIN1
chr2	cg10820936	ENSG00000118242	rs200857348	MREG	-20.8926	4.2557	9.13946e-07	0.235691	protein_coding	TRUE	MREG
chr2	cg12059950	ENSG00000198648	rs6708854	STK39	-71.6411	9.76691	2.21579e-13	0.227735	protein_coding	TRUE	STK39
chr2	cg09592903	ENSG00000115310	rs2588518	RTN4	-343.977	57.2679	1.89615e-09	0.224418	protein_coding	TRUE	RTN4
chr2	cg22585786	ENSG00000198648	rs7569501	STK39	-52.0015	6.17982	3.93805e-17	0.224174	protein_coding	TRUE	STK39
chr2	cg18054993	ENSG00000118242	rs200857348	MREG	-24.3164	4.87524	6.10913e-07	0.215757	protein_coding	TRUE	MREG
chr2	cg02611153	ENSG00000136717	rs35322174	BIN1	-51.9161	8.50923	1.05311e-09	0.201082	protein_coding	TRUE	BIN1
chr2	cg08568260	ENSG00000198648	rs3769392	STK39	29.2781	3.79705	1.25071e-14	0.184371	protein_coding	TRUE	STK39
chr2	cg19026692	ENSG00000198648	rs11372724	STK39	-55.2992	8.11319	9.36315e-12	0.18346	protein_coding	TRUE	STK39
chr2	cg08541846	ENSG00000115350	rs12366	POLE4	11.4999	1.48516	9.6951e-15	0.18046	protein_coding	TRUE	POLE4
chr2	cg03331300	ENSG00000198648	rs4668025	STK39	-26.0227	3.08807	3.55151e-17	0.167509	protein_coding	TRUE	STK39
chr2	cg13818762	ENSG00000162992	rs62190049	NEUROD1	-71.7674	14.4318	6.59743e-07	0.162898	protein_coding	TRUE	NEUROD1
chr2	cg26009582	ENSG00000118242	rs200857348	MREG	-20.2286	3.88698	1.94842e-07	0.155454	protein_coding	TRUE	MREG
chr2	cg07992385	ENSG00000198648	rs2063962	STK39	-72.1237	9.75571	1.43576e-13	0.138429	protein_coding	TRUE	STK39
chr2	cg02706766	ENSG00000118242	rs200857348	MREG	-16.5018	3.19947	2.50069e-07	0.1262	protein_coding	TRUE	MREG
chr2	cg23692114	ENSG00000115350	rs7586613	POLE4	8.37662	1.29198	8.95899e-11	0.11462	protein_coding	TRUE	POLE4
chr2	cg15126615	ENSG00000115350	rs7586613	POLE4	11.4554	1.95462	4.60945e-09	0.113634	protein_coding	TRUE	POLE4
chr2	cg03650730	ENSG00000168385	rs12624197	SEPTIN2	34.999	6.34983	3.55198e-08	0.0930661	protein_coding	TRUE	SEPTIN2
chr2	cg02226385	ENSG00000168385	rs10205490	SEPTIN2	-46.6959	8.38691	2.58115e-08	0.0623514	protein_coding	TRUE	SEPTIN2
chr2	cg10293909	ENSG00000115350	rs12366	POLE4	3.28136	0.380995	7.14265e-18	0.0550859	protein_coding	TRUE	POLE4
chr2	cg16297948	ENSG00000181798	rs2916579	LINC00471	0.769667	0.151524	3.78443e-07	0.0548025	lincRNA	TRUE	LINC00471
chr20	cg12302830	ENSG00000198646	rs6060017	NCOA6	12.485	1.70273	2.26196e-13	0.789046	protein_coding	TRUE	NCOA6
chr20	cg16810054	ENSG00000198646	rs6060017	NCOA6	11.9506	2.35237	3.76958e-07	0.472047	protein_coding	TRUE	NCOA6
chr20	cg07237542	ENSG00000125814	rs3736755	NAPB	-230.298	40.8546	1.73031e-08	0.155395	protein_coding	TRUE	NAPB
chr21	cg12638745	ENSG00000157578	rs73367987	LCA5L	1.8629	0.307395	1.35898e-09	0.927432	protein_coding	TRUE	LCA5L
chr21	cg25558037	ENSG00000182093	rs2836997	WRB	-31.67	3.54696	4.30744e-19	0.639999	protein_coding	TRUE	WRB
chr21	cg04455712	ENSG00000160208	rs9977076	RRP1B	-128.322	14.3677	4.21102e-19	0.587033	protein_coding	TRUE	RRP1B
chr21	cg16909583	ENSG00000160208	rs9977076	RRP1B	-63.4299	5.81636	1.08567e-27	0.55314	protein_coding	TRUE	RRP1B
chr21	cg16080308	ENSG00000160208	rs969060	RRP1B	-175.794	20.0102	1.56066e-18	0.535111	protein_coding	TRUE	RRP1B
chr21	cg13210069	ENSG00000160208	rs9977076	RRP1B	-95.1261	9.41331	5.22341e-24	0.484248	protein_coding	TRUE	RRP1B
chr21	cg12054554	ENSG00000182093	rs2836998	WRB	143.74	21.0502	8.58481e-12	0.426896	protein_coding	TRUE	WRB
chr21	cg12638745	ENSG00000185437	rs73367987	SH3BGR	4.25035	0.575204	1.47615e-13	0.289934	protein_coding	TRUE	SH3BGR
chr21	cg16071993	ENSG00000160208	rs11702544	RRP1B	-152.266	17.2876	1.27619e-18	0.186946	protein_coding	TRUE	RRP1B
chr21	cg10815453	ENSG00000160208	rs2251253	RRP1B	-85.7559	8.3877	1.54807e-24	0.0587916	protein_coding	TRUE	RRP1B
chr21	cg23342358	ENSG00000183570	rs71324444	PCBP3	-12.6651	2.50067	4.09084e-07	0.0560709	protein_coding	TRUE	PCBP3
chr22	cg12445256	ENSG00000186951	rs135538	PPARA	-130.1	18.8852	5.61917e-12	0.807612	protein_coding	TRUE	PPARA
chr22	cg12672222	ENSG00000280384	rs135539	RP4-695O20.1	-0.522807	0.102506	3.39149e-07	0.602757	sense_intronic	TRUE	RP4-695O20.1
chr22	cg16803515	ENSG00000186951	rs135549	PPARA	-71.3268	8.11164	1.45438e-18	0.572052	protein_coding	TRUE	PPARA
chr22	cg05691848	ENSG00000186951	rs135549	PPARA	-87.419	12.5877	3.78984e-12	0.447762	protein_coding	TRUE	PPARA
chr22	cg12672222	ENSG00000186951	rs135539	PPARA	-81.8903	9.64837	2.11173e-17	0.365007	protein_coding	TRUE	PPARA
chr22	cg02543147	ENSG00000186951	rs135538	PPARA	-71.9693	8.24077	2.47281e-18	0.281197	protein_coding	TRUE	PPARA
chr22	cg23159233	ENSG00000186951	rs135538	PPARA	-75.3162	9.3216	6.4901e-16	0.280971	protein_coding	TRUE	PPARA
chr22	cg07410461	ENSG00000186951	rs135549	PPARA	-53.3202	6.10479	2.45469e-18	0.213863	protein_coding	TRUE	PPARA
chr22	cg08846053	ENSG00000186951	rs135549	PPARA	-63.686	7.38769	6.66268e-18	0.123818	protein_coding	TRUE	PPARA
chr22	cg12490598	ENSG00000186951	rs135539	PPARA	-89.1373	12.1866	2.58536e-13	0.105539	protein_coding	TRUE	PPARA
chr22	cg20589873	ENSG00000186951	rs135538	PPARA	-109.231	15.6158	2.65417e-12	0.0698646	protein_coding	TRUE	PPARA
chr3	cg06820102	ENSG00000177311	rs1344672	ZBTB38	-13.687	2.29378	2.41603e-09	0.994203	protein_coding	TRUE	ZBTB38
chr3	cg02870266	ENSG00000255021	rs7610197	RP11-536I6.2	-31.2911	6.3692	8.97495e-07	0.948497	lincRNA	TRUE	RP11-536I6.2
chr3	cg03848978	ENSG00000177311	rs1344672	ZBTB38	-19.9222	3.23146	7.04472e-10	0.944943	protein_coding	TRUE	ZBTB38
chr3	cg10394922	ENSG00000177311	rs1344672	ZBTB38	-33.2205	6.05909	4.18778e-08	0.921092	protein_coding	TRUE	ZBTB38
chr3	cg03993970	ENSG00000170248	rs9843488	PDCD6IP	-103.751	19.735	1.46279e-07	0.912091	protein_coding	TRUE	PDCD6IP
chr3	cg04352534	ENSG00000177311	rs13077048	ZBTB38	-10.8238	1.60344	1.47526e-11	0.87394	protein_coding	TRUE	ZBTB38
chr3	cg11421029	ENSG00000177311	rs13077048	ZBTB38	-13.5652	2.07777	6.63214e-11	0.870668	protein_coding	TRUE	ZBTB38
chr3	cg26432171	ENSG00000132155	rs35750419	RAF1	46.0226	6.17557	9.1679e-14	0.777119	protein_coding	TRUE	RAF1
chr3	cg02936049	ENSG00000177311	rs1344672	ZBTB38	-14.6166	2.30452	2.25945e-10	0.709756	protein_coding	TRUE	ZBTB38
chr3	cg21380154	ENSG00000177311	rs1344672	ZBTB38	-16.9258	2.65136	1.72734e-10	0.603143	protein_coding	TRUE	ZBTB38
chr3	cg20533576	ENSG00000255021	rs7610197	RP11-536I6.2	-8.13632	0.684912	1.5153e-32	0.488196	lincRNA	TRUE	RP11-536I6.2
chr3	cg22029806	ENSG00000196776	rs17231503	CD47	-286.375	30.7986	1.42681e-20	0.465848	protein_coding	TRUE	CD47
chr3	cg08104207	ENSG00000255021	rs6772730	RP11-536I6.2	-21.0614	2.99549	2.05008e-12	0.442059	lincRNA	TRUE	RP11-536I6.2
chr3	cg13544074	ENSG00000255021	rs10865725	RP11-536I6.2	-26.5805	4.60095	7.59615e-09	0.415175	lincRNA	TRUE	RP11-536I6.2
chr3	cg12790627	ENSG00000255021	rs6772730	RP11-536I6.2	-10.9355	0.96017	4.73714e-30	0.397264	lincRNA	TRUE	RP11-536I6.2
chr3	cg12491496	ENSG00000132155	rs201895405	RAF1	-59.305	11.6759	3.78905e-07	0.358979	protein_coding	TRUE	RAF1
chr3	cg13787933	ENSG00000177311	rs13069734	ZBTB38	-38.3466	7.31006	1.55659e-07	0.295545	protein_coding	TRUE	ZBTB38
chr3	cg08787647	ENSG00000163913	rs149948721	IFT122	6.05978	1.18422	3.10284e-07	0.181756	protein_coding	TRUE	IFT122
chr3	cg16516295	ENSG00000163913	rs112016935	IFT122	5.42319	0.942186	8.6151e-09	0.0776359	protein_coding	TRUE	IFT122
chr3	cg16991944	ENSG00000255021	rs7610197	RP11-536I6.2	-5.19504	0.394679	1.43844e-39	0.0633104	lincRNA	TRUE	RP11-536I6.2
chr3	cg08049441	ENSG00000163913	rs112016935	IFT122	5.44298	0.945851	8.68581e-09	0.0538794	protein_coding	TRUE	IFT122
chr4	cg15478081	ENSG00000164323	rs3108297	CFAP97	-41.9419	5.16112	4.41856e-16	0.986602	protein_coding	TRUE	CFAP97
chr4	cg21907850	ENSG00000109762	rs3108241	SNX25	-31.0646	2.9273	2.62023e-26	0.941701	protein_coding	TRUE	SNX25
chr4	cg08240002	ENSG00000164323	rs3108244	CFAP97	-10.7336	0.835583	9.09596e-38	0.926208	protein_coding	TRUE	CFAP97
chr4	cg12836958	ENSG00000164323	rs3108244	CFAP97	-21.0458	1.8557	8.20811e-30	0.897466	protein_coding	TRUE	CFAP97
chr4	cg06277849	ENSG00000109775	rs36058225	UFSP2	42.6244	8.2857	2.68466e-07	0.896189	protein_coding	TRUE	UFSP2
chr4	cg01881046	ENSG00000164323	rs3108244	CFAP97	-12.6947	0.981992	3.14921e-38	0.810201	protein_coding	TRUE	CFAP97
chr4	cg24290320	ENSG00000071205	rs147731839	ARHGAP10	-30.659	5.7019	7.57425e-08	0.794366	protein_coding	TRUE	ARHGAP10
chr4	cg07557423	ENSG00000124406	rs2612520	ATP8A1	-69.988	10.3318	1.25238e-11	0.793936	protein_coding	TRUE	ATP8A1
chr4	cg12836958	ENSG00000109762	rs3108244	SNX25	-22.6392	2.05144	2.5699e-28	0.777904	protein_coding	TRUE	SNX25
chr4	cg01881046	ENSG00000109762	rs3108244	SNX25	-13.6558	1.09417	9.53709e-36	0.741657	protein_coding	TRUE	SNX25
chr4	cg13467274	ENSG00000182168	rs17024152	UNC5C	-11.5503	2.12438	5.41849e-08	0.657438	protein_coding	TRUE	UNC5C
chr4	cg17998594	ENSG00000164323	rs3108244	CFAP97	-41.2463	5.52282	8.12095e-14	0.634878	protein_coding	TRUE	CFAP97
chr4	cg12654519	ENSG00000071205	rs200445508	ARHGAP10	-69.5391	11.1011	3.74869e-10	0.634162	protein_coding	TRUE	ARHGAP10
chr4	cg17998594	ENSG00000109762	rs3108244	SNX25	-44.3691	6.01281	1.59359e-13	0.544676	protein_coding	TRUE	SNX25
chr4	cg04849770	ENSG00000251200	rs17711139	RP11-6E9.5	-36.4552	7.38478	7.95244e-07	0.538033	antisense	TRUE	RP11-6E9.5
chr4	cg21907850	ENSG00000164323	rs3108241	CFAP97	-29.6618	2.68049	1.83714e-28	0.537775	protein_coding	TRUE	CFAP97
chr4	cg08240002	ENSG00000109762	rs3108244	SNX25	-11.5463	0.930638	2.39936e-35	0.525826	protein_coding	TRUE	SNX25
chr4	cg16878920	ENSG00000071205	rs147731839	ARHGAP10	-26.8853	4.7016	1.07569e-08	0.501999	protein_coding	TRUE	ARHGAP10
chr4	cg15478081	ENSG00000109762	rs3108297	SNX25	-44.9345	5.6146	1.21279e-15	0.294834	protein_coding	TRUE	SNX25
chr4	cg13036656	ENSG00000242686	rs28569875	RP11-1191J2.2	4.32019	0.743719	6.28838e-09	0.237354	antisense	TRUE	RP11-1191J2.2
chr4	cg24386507	ENSG00000182168	rs1971982	UNC5C	-17.1562	3.35665	3.20276e-07	0.231138	protein_coding	TRUE	UNC5C
chr4	cg04274830	ENSG00000138760	rs12508223	SCARB2	-69.7497	13.6304	3.10048e-07	0.226789	protein_coding	TRUE	SCARB2
chr4	cg13845366	ENSG00000071205	rs72951426	ARHGAP10	-36.7539	6.01859	1.01698e-09	0.191753	protein_coding	TRUE	ARHGAP10
chr4	cg08714767	ENSG00000250317	rs9647441	SMIM20	-15.2039	2.85014	9.58285e-08	0.184317	protein_coding	TRUE	SMIM20
chr4	cg12396412	ENSG00000071205	rs116429035	ARHGAP10	-44.5286	7.75337	9.2942e-09	0.085906	protein_coding	TRUE	ARHGAP10
chr4	cg12468008	ENSG00000182168	rs9993649	UNC5C	-10.3514	1.75817	3.9179e-09	0.0761409	protein_coding	TRUE	UNC5C
chr4	cg08018825	ENSG00000250317	rs6841648	SMIM20	-17.4586	3.47641	5.11305e-07	0.0706484	protein_coding	TRUE	SMIM20
chr4	cg11379377	ENSG00000250317	rs2124652	SMIM20	11.1413	2.20273	4.23815e-07	0.0681386	protein_coding	TRUE	SMIM20
chr4	cg02207086	ENSG00000164323	rs2030800	CFAP97	-43.1495	7.14175	1.52341e-09	0.0594654	protein_coding	TRUE	CFAP97
chr4	cg03640051	ENSG00000124406	rs1460357	ATP8A1	-67.9981	8.28243	2.21319e-16	0.056136	protein_coding	TRUE	ATP8A1
chr4	cg17280671	ENSG00000124406	rs10008642	ATP8A1	-135.699	24.512	3.09408e-08	0.053348	protein_coding	TRUE	ATP8A1
chr5	cg23518039	ENSG00000253406	rs2918267	AC012613.2	13.0044	1.64113	2.29944e-15	0.944278	antisense	TRUE	AC012613.2
chr5	cg17593055	ENSG00000253406	rs1866375	AC012613.2	34.8317	6.74254	2.39197e-07	0.921779	antisense	TRUE	AC012613.2
chr5	cg04869206	ENSG00000164327	rs35476737	RICTOR	112.622	18.378	8.89406e-10	0.848398	protein_coding	TRUE	RICTOR
chr5	cg06539116	ENSG00000253406	rs2963489	AC012613.2	-27.1809	3.7313	3.22702e-13	0.755491	antisense	TRUE	AC012613.2
chr5	cg18060909	ENSG00000197043	rs2346026	ANXA6	-56.9369	9.06063	3.29984e-10	0.725717	protein_coding	TRUE	ANXA6
chr5	cg11649167	ENSG00000253406	rs13161048	AC012613.2	21.6047	3.88629	2.70974e-08	0.570923	antisense	TRUE	AC012613.2
chr5	cg23518039	ENSG00000173210	rs2918267	ABLIM3	-29.6038	6.00042	8.07187e-07	0.33219	protein_coding	TRUE	ABLIM3
chr5	cg05015628	ENSG00000164327	rs13184911	RICTOR	-88.0808	11.8115	8.83669e-14	0.266037	protein_coding	TRUE	RICTOR
chr5	cg27543327	ENSG00000173210	rs7714706	ABLIM3	-19.2256	3.66604	1.56929e-07	0.218198	protein_coding	TRUE	ABLIM3
chr5	cg27543327	ENSG00000253406	rs7714706	AC012613.2	8.22171	0.859704	1.13918e-21	0.0988581	antisense	TRUE	AC012613.2
chr6	cg26241416	ENSG00000157593	rs13296	SLC35B2	-2.78505	0.533055	1.74446e-07	0.651766	protein_coding	TRUE	SLC35B2
chr6	cg23927571	ENSG00000007866	rs2395628	TEAD3	-32.2521	6.36635	4.06213e-07	0.454656	protein_coding	TRUE	TEAD3
chr6	cg10714061	ENSG00000161896	rs10672	IP6K3	-9.60633	1.84746	1.99569e-07	0.355264	protein_coding	TRUE	IP6K3
chr6	cg15808668	ENSG00000161896	rs597723	IP6K3	-7.11736	1.21037	4.09428e-09	0.343202	protein_coding	TRUE	IP6K3
chr6	cg11545871	ENSG00000137288	rs6457740	UQCC2	-55.6081	10.855	3.01016e-07	0.338528	protein_coding	TRUE	UQCC2
chr6	cg18708504	ENSG00000137288	rs482786	UQCC2	-37.4427	7.62352	9.03974e-07	0.332136	protein_coding	TRUE	UQCC2
chr6	cg03983138	ENSG00000196821	rs2744944	C6orf106	-83.4179	12.6935	4.97448e-11	0.314558	protein_coding	TRUE	C6orf106
chr6	cg23176759	ENSG00000188107	rs4458657	EYS	-93.7504	14.5081	1.0337e-10	0.296923	protein_coding	TRUE	EYS
chr6	cg12223510	ENSG00000196821	rs58655892	C6orf106	-53.481	5.67369	4.25486e-21	0.152605	protein_coding	TRUE	C6orf106
chr6	cg15251311	ENSG00000161896	rs622917	IP6K3	-6.64647	1.05318	2.7747e-10	0.117822	protein_coding	TRUE	IP6K3
chr6	cg18833713	ENSG00000196821	rs58655892	C6orf106	-54.9191	8.9154	7.27338e-10	0.10615	protein_coding	TRUE	C6orf106
chr6	cg24549488	ENSG00000130338	rs183797	TULP4	-22.8573	4.29238	1.00909e-07	0.0841438	protein_coding	TRUE	TULP4
chr6	cg12029281	ENSG00000007866	rs7744287	TEAD3	-42.5484	8.52278	5.96609e-07	0.0734447	protein_coding	TRUE	TEAD3
chr6	cg11545871	ENSG00000161896	rs6457740	IP6K3	-7.74591	1.42725	5.72622e-08	0.0604066	protein_coding	TRUE	IP6K3
chr7	cg08968200	ENSG00000225329	rs2041830	LHFPL3-AS2	-1.47732	0.281759	1.57807e-07	0.892784	processed_transcript	TRUE	LHFPL3-AS2
chr7	cg14205632	ENSG00000225329	rs11561931	LHFPL3-AS2	-2.71117	0.514542	1.37099e-07	0.855614	processed_transcript	TRUE	LHFPL3-AS2
chr7	cg12483292	ENSG00000122778	rs2774975	KIAA1549	7.62538	1.41316	6.81584e-08	0.60898	protein_coding	TRUE	KIAA1549
chr7	cg06242242	ENSG00000164818	rs6463523	DNAAF5	-4.82256	0.904631	9.76929e-08	0.569754	protein_coding	TRUE	DNAAF5
chr7	cg11064039	ENSG00000164818	rs4724821	DNAAF5	-1.6225	0.265315	9.633e-10	0.471181	protein_coding	TRUE	DNAAF5
chr7	cg11742189	ENSG00000106348	rs144398561	IMPDH1	-45.1782	7.97339	1.46071e-08	0.390448	protein_coding	TRUE	IMPDH1
chr7	cg16868500	ENSG00000177679	rs200043238	SRRM3	-41.8934	7.57695	3.2196e-08	0.276411	protein_coding	TRUE	SRRM3
chr7	cg25483749	ENSG00000136261	rs697509	BZW2	-43.4644	8.25916	1.4206e-07	0.115081	protein_coding	TRUE	BZW2
chr8	cg12177456	ENSG00000183638	rs4841410	RP1L1	-166.735	29.4197	1.44929e-08	0.930654	protein_coding	TRUE	RP1L1
chr8	cg07622412	ENSG00000120910	rs10094778	PPP3CC	-33.5484	6.30993	1.05629e-07	0.925008	protein_coding	TRUE	PPP3CC
chr8	cg26224715	ENSG00000183638	rs4841410	RP1L1	-63.54	9.21718	5.43776e-12	0.879569	protein_coding	TRUE	RP1L1
chr8	cg15627152	ENSG00000132561	rs4735521	MATN2	-41.8922	7.83167	8.84077e-08	0.602654	protein_coding	TRUE	MATN2
chr8	cg24315197	ENSG00000183638	rs7386213	RP1L1	246.596	48.9836	4.79691e-07	0.45416	protein_coding	TRUE	RP1L1
chr8	cg23872081	ENSG00000120910	rs2469745	PPP3CC	30.6614	4.85843	2.77294e-10	0.30894	protein_coding	TRUE	PPP3CC
chr8	cg26101170	ENSG00000183638	rs56057779	RP1L1	-63.6303	9.04542	1.99929e-12	0.302561	protein_coding	TRUE	RP1L1
chr8	cg01800426	ENSG00000253671	rs6586651	RP11-806O11.1	-3.27254	0.656957	6.31395e-07	0.28765	processed_transcript	TRUE	RP11-806O11.1
chr8	cg20213479	ENSG00000183638	rs4841407	RP1L1	-236.34	41.4886	1.22284e-08	0.0954539	protein_coding	TRUE	RP1L1
chr8	cg04898035	ENSG00000253671	rs12549697	RP11-806O11.1	-0.542263	0.0733928	1.48487e-13	0.0564249	processed_transcript	TRUE	RP11-806O11.1
chr9	cg14282632	ENSG00000119139	rs6560589	TJP2	-140.214	21.9249	1.60341e-10	0.990783	protein_coding	TRUE	TJP2
chr9	cg04055528	ENSG00000130723	rs2994040	PRRC2B	-57.4016	7.84448	2.5272e-13	0.951818	protein_coding	TRUE	PRRC2B
chr9	cg05600072	ENSG00000136854	rs4836573	STXBP1	-299.258	60.5026	7.56794e-07	0.924355	protein_coding	TRUE	STXBP1
chr9	cg03808351	ENSG00000056558	rs3761849	TRAF1	22.2697	3.87257	8.89106e-09	0.89625	protein_coding	TRUE	TRAF1
chr9	cg00964918	ENSG00000130723	rs75055012	PRRC2B	-102.147	19.6146	1.91224e-07	0.821258	protein_coding	TRUE	PRRC2B
chr9	cg14953650	ENSG00000130723	rs34830565	PRRC2B	-93.7329	18.17	2.48732e-07	0.724565	protein_coding	TRUE	PRRC2B
chr9	cg16223770	ENSG00000165661	rs67827752	QSOX2	-7.43014	1.31048	1.42979e-08	0.693942	protein_coding	TRUE	QSOX2
chr9	cg07405163	ENSG00000165661	rs36094334	QSOX2	-2.27464	0.351963	1.02837e-10	0.665253	protein_coding	TRUE	QSOX2
chr9	cg13117720	ENSG00000130723	rs2994040	PRRC2B	-99.2314	17.5785	1.65135e-08	0.424939	protein_coding	TRUE	PRRC2B
chr9	cg14335029	ENSG00000130723	rs2994040	PRRC2B	-108.309	17.6188	7.87738e-10	0.398724	protein_coding	TRUE	PRRC2B
chr9	cg14774860	ENSG00000262075	rs28380074	DKFZP434A062	37.5456	6.11806	8.4176e-10	0.0837761	lincRNA	TRUE	DKFZP434A062
chr9	cg07414392	ENSG00000119139	rs7019370	TJP2	-114.211	22.6094	4.38415e-07	0.0731514	protein_coding	TRUE	TJP2

## Sheet: M2E_SMR_Loops
chr	exposure	trait	top_snp	Gene_symbol	bxy	bxy_se	bxy_pval	heidi_pval	Biotype	HEIDI_Pvalue_Significant	Target gene based on loops
chr1	cg13387374	ENSG00000127463	rs3748757	EMC1	-88.6397	16.7572	1.22554e-07	0.930685	protein_coding	TRUE	EMC1
chr1	cg26204283	ENSG00000000457	rs79945836	SCYL3	-4.00036	0.807218	7.20567e-07	0.922803	protein_coding	TRUE	SCYL3
chr1	cg25763306	ENSG00000270035	rs12747548	RP11-338N10.2	-1.12179	0.161553	3.81764e-12	0.886751	lincRNA	TRUE	RP11-338N10.2
chr1	cg07302580	ENSG00000081277	rs11801270	PKP1	-129.197	22.8339	1.53052e-08	0.758408	protein_coding	TRUE	PKP1
chr1	cg23594461	ENSG00000081248	rs2281845	CACNA1S	-6.80111	1.15363	3.73773e-09	0.755695	protein_coding	TRUE	CACNA1S
chr1	cg10120255	ENSG00000116514	rs35049190	RNF19B	-16.9461	2.48983	1.0027e-11	0.720405	protein_coding	TRUE	RNF19B
chr1	cg27529520	ENSG00000117115	rs1022579	PADI2	-63.2115	7.05682	3.32112e-19	0.566623	protein_coding	TRUE	PADI2
chr1	cg04906435	ENSG00000116514	rs171837	RNF19B	-19.8988	3.60995	3.54347e-08	0.53706	protein_coding	TRUE	RNF19B
chr1	cg08885800	ENSG00000081248	rs7516023	CACNA1S	-3.08417	0.460005	2.019e-11	0.508648	protein_coding	TRUE	CACNA1S
chr1	cg17766148	ENSG00000081248	rs4498834	CACNA1S	-3.55418	0.600957	3.33486e-09	0.467397	protein_coding	TRUE	CACNA1S
chr1	cg16835277	ENSG00000117115	rs1022579	PADI2	-127.829	17.4972	2.75858e-13	0.458	protein_coding	TRUE	PADI2
chr1	cg20694572	ENSG00000237975	rs1496042	FLG-AS1	5.36692	1.02444	1.61545e-07	0.358696	antisense	TRUE	FLG-AS1
chr1	cg09737265	ENSG00000162669	rs17131429	HFM1	-14.9571	2.4068	5.14758e-10	0.353305	protein_coding	TRUE	HFM1
chr1	cg10799510	ENSG00000081277	rs11801270	PKP1	-142.884	27.8454	2.87698e-07	0.342498	protein_coding	TRUE	PKP1
chr1	cg09319435	ENSG00000142655	rs2026792	PEX14	-21.7064	2.5999	6.88845e-17	0.302925	protein_coding	TRUE	PEX14
chr1	cg14806693	ENSG00000116514	rs171837	RNF19B	-8.62852	0.997575	5.17242e-18	0.267092	protein_coding	TRUE	RNF19B
chr1	cg27182133	ENSG00000142655	rs2150038	PEX14	-27.0781	4.43655	1.03818e-09	0.228242	protein_coding	TRUE	PEX14
chr1	cg04607379	ENSG00000142655	rs2026792	PEX14	-15.2562	1.84561	1.38303e-16	0.221836	protein_coding	TRUE	PEX14
chr1	cg05531421	ENSG00000116675	rs10789179	DNAJC6	19.8523	3.19629	5.26401e-10	0.122897	protein_coding	TRUE	DNAJC6
chr1	cg16819028	ENSG00000081277	rs12117501	PKP1	-90.0096	15.5287	6.77763e-09	0.097915	protein_coding	TRUE	PKP1
chr1	cg27033754	ENSG00000236200	rs150936757	KDM4A-AS1	5.80019	0.922863	3.2787e-10	0.0942318	antisense	TRUE	KDM4A-AS1
chr11	cg09612920	ENSG00000023171	rs2846310	GRAMD1B	-192.109	36.9505	2.00275e-07	0.900727	protein_coding	TRUE	GRAMD1B
chr11	cg02600515	ENSG00000162222	rs113326335	TTC9C	2.72185	0.46863	6.31856e-09	0.746058	protein_coding	TRUE	TTC9C
chr11	cg19038246	ENSG00000023171	rs4936820	GRAMD1B	-99.2886	20.0416	7.26577e-07	0.656753	protein_coding	TRUE	GRAMD1B
chr11	cg20584555	ENSG00000167995	rs2668899	BEST1	-9.48342	0.881903	5.71439e-27	0.648351	protein_coding	TRUE	BEST1
chr11	cg23584647	ENSG00000167995	rs2736595	BEST1	-39.1954	5.17895	3.78395e-14	0.631627	protein_coding	TRUE	BEST1
chr11	cg22892043	ENSG00000167995	rs2524294	BEST1	-42.8016	8.46449	4.26764e-07	0.62301	protein_coding	TRUE	BEST1
chr11	cg12728690	ENSG00000023171	rs2846310	GRAMD1B	-127.981	25.0388	3.19935e-07	0.59576	protein_coding	TRUE	GRAMD1B
chr11	cg24961445	ENSG00000023171	rs17127435	GRAMD1B	-144.313	28.5847	4.45023e-07	0.595681	protein_coding	TRUE	GRAMD1B
chr11	cg11562596	ENSG00000167995	rs2524294	BEST1	-8.14462	0.757647	5.9333e-27	0.539837	protein_coding	TRUE	BEST1
chr11	cg05481452	ENSG00000167995	rs2668899	BEST1	-10.1167	0.982201	7.04167e-25	0.523218	protein_coding	TRUE	BEST1
chr11	cg03818576	ENSG00000148948	rs998447	LRRC4C	-24.8698	3.29119	4.14154e-14	0.425196	protein_coding	TRUE	LRRC4C
chr11	cg12316258	ENSG00000162194	rs113222038	LBHD1	54.0284	8.14703	3.31918e-11	0.415966	protein_coding	TRUE	LBHD1
chr11	cg11566244	ENSG00000084207	rs12794995	GSTP1	-64.5587	9.72285	3.13916e-11	0.41116	protein_coding	TRUE	GSTP1
chr11	cg13709043	ENSG00000023171	rs4936820	GRAMD1B	-84.1549	16.7526	5.07652e-07	0.353694	protein_coding	TRUE	GRAMD1B
chr11	cg15456821	ENSG00000167995	rs2727272	BEST1	-19.629	2.36873	1.16419e-16	0.233915	protein_coding	TRUE	BEST1
chr11	cg12316258	ENSG00000278615	rs113222038	C11orf98	15.2957	2.45734	4.83065e-10	0.206099	protein_coding	TRUE	C11orf98
chr11	cg20362170	ENSG00000084207	rs12794995	GSTP1	-28.0105	3.26151	8.83516e-18	0.149317	protein_coding	TRUE	GSTP1
chr11	cg03603279	ENSG00000084207	rs12794995	GSTP1	-69.1136	9.78737	1.64707e-12	0.134208	protein_coding	TRUE	GSTP1
chr11	cg10449041	ENSG00000149480	rs35210758	MTA2	-29.424	5.07096	6.53504e-09	0.112206	protein_coding	TRUE	MTA2
chr11	cg10449041	ENSG00000162194	rs35210758	LBHD1	-38.691	5.03151	1.47438e-14	0.0685435	protein_coding	TRUE	LBHD1
chr11	cg10449041	ENSG00000278615	rs35210758	C11orf98	-10.1451	1.53317	3.66426e-11	0.0668957	protein_coding	TRUE	C11orf98
chr11	cg26553513	ENSG00000148948	rs1377104	LRRC4C	-29.2386	4.59504	1.97753e-10	0.063619	protein_coding	TRUE	LRRC4C
chr12	cg03425615	ENSG00000090615	rs61952781	GOLGA3	-46.3911	5.77369	9.36522e-16	0.959657	protein_coding	TRUE	GOLGA3
chr12	cg09537870	ENSG00000090615	rs72624274	GOLGA3	-46.4402	5.39617	7.55624e-18	0.943775	protein_coding	TRUE	GOLGA3
chr12	cg16120883	ENSG00000090615	rs146419925	GOLGA3	-52.5649	7.83096	1.9139e-11	0.87992	protein_coding	TRUE	GOLGA3
chr12	cg08695912	ENSG00000090615	rs72624274	GOLGA3	-55.0934	7.12748	1.07787e-14	0.878162	protein_coding	TRUE	GOLGA3
chr12	cg02243221	ENSG00000090615	rs72624274	GOLGA3	-46.3191	5.55951	7.98181e-17	0.869095	protein_coding	TRUE	GOLGA3
chr12	cg20765580	ENSG00000090615	rs146419925	GOLGA3	-67.9144	9.74812	3.23956e-12	0.867473	protein_coding	TRUE	GOLGA3
chr12	cg22149555	ENSG00000090615	rs72624274	GOLGA3	-52.8285	6.34546	8.40343e-17	0.82746	protein_coding	TRUE	GOLGA3
chr12	cg13046214	ENSG00000090615	rs146419925	GOLGA3	-40.4585	5.65684	8.54309e-13	0.820387	protein_coding	TRUE	GOLGA3
chr12	cg23058246	ENSG00000090615	rs61952781	GOLGA3	-45.5778	5.65478	7.62657e-16	0.819238	protein_coding	TRUE	GOLGA3
chr12	cg19837214	ENSG00000090615	rs61952781	GOLGA3	-98.6523	14.0775	2.42066e-12	0.812456	protein_coding	TRUE	GOLGA3
chr12	cg14949892	ENSG00000072609	rs74721187	CHFR	6.80498	1.30061	1.67545e-07	0.776809	protein_coding	TRUE	CHFR
chr12	cg08424446	ENSG00000090615	rs72624274	GOLGA3	-65.617	10.0971	8.10659e-11	0.766577	protein_coding	TRUE	GOLGA3
chr12	cg07052262	ENSG00000090615	rs10781656	GOLGA3	-68.5587	9.32251	1.92212e-13	0.764665	protein_coding	TRUE	GOLGA3
chr12	cg06735598	ENSG00000168778	rs4930708	TCTN2	-25.9718	3.54928	2.52652e-13	0.752079	protein_coding	TRUE	TCTN2
chr12	cg16020270	ENSG00000090615	rs72624274	GOLGA3	-58.4709	7.06009	1.21234e-16	0.728521	protein_coding	TRUE	GOLGA3
chr12	cg05614952	ENSG00000090615	rs61952781	GOLGA3	-39.5809	4.81495	2.02794e-16	0.71389	protein_coding	TRUE	GOLGA3
chr12	cg22844555	ENSG00000090615	rs146419925	GOLGA3	-94.8799	14.8818	1.82268e-10	0.657663	protein_coding	TRUE	GOLGA3
chr12	cg23470262	ENSG00000090615	rs72624274	GOLGA3	-55.4046	6.84038	5.51241e-16	0.655887	protein_coding	TRUE	GOLGA3
chr12	cg16214937	ENSG00000090615	rs10781656	GOLGA3	-92.6152	14.8876	4.94126e-10	0.619836	protein_coding	TRUE	GOLGA3
chr12	cg10388270	ENSG00000090615	rs72624274	GOLGA3	-41.8265	4.97961	4.48175e-17	0.583214	protein_coding	TRUE	GOLGA3
chr12	cg15108326	ENSG00000090615	rs146419925	GOLGA3	-101.711	19.0737	9.68678e-08	0.545827	protein_coding	TRUE	GOLGA3
chr12	cg14903202	ENSG00000090615	rs146419925	GOLGA3	-97.5728	16.6367	4.49361e-09	0.415638	protein_coding	TRUE	GOLGA3
chr12	cg09904296	ENSG00000090615	rs28372675	GOLGA3	111.323	21.2053	1.52273e-07	0.112354	protein_coding	TRUE	GOLGA3
chr12	cg20594304	ENSG00000111252	rs11065898	SH2B3	-7.46112	0.952746	4.83345e-15	0.107675	protein_coding	TRUE	SH2B3
chr12	cg14760880	ENSG00000111252	rs11065898	SH2B3	-15.0639	1.98774	3.49783e-14	0.10366	protein_coding	TRUE	SH2B3
chr12	cg27362255	ENSG00000176915	rs77178508	ANKLE2	37.1648	7.21649	2.60508e-07	0.101334	protein_coding	TRUE	ANKLE2
chr12	cg03538318	ENSG00000072609	rs55706161	CHFR	5.50737	0.968393	1.29194e-08	0.0795175	protein_coding	TRUE	CHFR
chr13	cg00191181	ENSG00000136141	rs1326110	LRCH1	-10.6511	1.35322	3.52114e-15	0.725055	protein_coding	TRUE	LRCH1
chr13	cg06650250	ENSG00000136141	rs1326110	LRCH1	-13.2519	2.15608	7.93184e-10	0.628373	protein_coding	TRUE	LRCH1
chr13	cg17351439	ENSG00000183098	rs5805796	GPC6	-12.5754	1.75503	7.76088e-13	0.625053	protein_coding	TRUE	GPC6
chr13	cg08005604	ENSG00000136141	rs28489097	LRCH1	-7.64997	1.02431	8.11776e-14	0.567808	protein_coding	TRUE	LRCH1
chr13	cg02305431	ENSG00000132964	rs3834505	CDK8	-13.0127	2.16628	1.89066e-09	0.557456	protein_coding	TRUE	CDK8
chr13	cg08520986	ENSG00000172915	rs7332116	NBEA	-46.205	9.28313	6.44756e-07	0.243296	protein_coding	TRUE	NBEA
chr14	cg16091920	ENSG00000080823	rs1190596	MOK	-572.835	111.087	2.51416e-07	0.588309	protein_coding	TRUE	MOK
chr14	cg01811583	ENSG00000066629	rs11625037	EML1	-33.4504	6.35214	1.39432e-07	0.547568	protein_coding	TRUE	EML1
chr14	cg26180015	ENSG00000066629	rs11625037	EML1	-17.7103	3.09349	1.03424e-08	0.474729	protein_coding	TRUE	EML1
chr14	cg08669673	ENSG00000066629	rs11625037	EML1	-21.8654	4.05264	6.83871e-08	0.447352	protein_coding	TRUE	EML1
chr14	cg13725826	ENSG00000066629	rs11625037	EML1	-21.7071	4.24061	3.07379e-07	0.22636	protein_coding	TRUE	EML1
chr14	cg07922154	ENSG00000081181	rs6573787	ARG2	-13.2279	2.40707	3.89701e-08	0.092953	protein_coding	TRUE	ARG2
chr15	cg14110457	ENSG00000171914	rs2439718	TLN2	-40.6455	6.91845	4.22977e-09	0.777272	protein_coding	TRUE	TLN2
chr15	cg01956614	ENSG00000171914	rs2439718	TLN2	-47.6967	9.07648	1.48041e-07	0.547447	protein_coding	TRUE	TLN2
chr15	cg26710563	ENSG00000171914	rs56083775	TLN2	-39.5754	5.8528	1.36303e-11	0.514534	protein_coding	TRUE	TLN2
chr15	cg22454588	ENSG00000198794	rs11072519	SCAMP5	-332.481	62.126	8.71222e-08	0.385169	protein_coding	TRUE	SCAMP5
chr15	cg10620100	ENSG00000128928	rs146167647	IVD	-22.1014	3.44787	1.45376e-10	0.333487	protein_coding	TRUE	IVD
chr15	cg25186680	ENSG00000196391	rs7181258	ZNF774	-1.1846	0.224516	1.31876e-07	0.24759	protein_coding	TRUE	ZNF774
chr15	cg09265959	ENSG00000166128	rs1017546	RAB8B	-8.5571	1.60786	1.02605e-07	0.140019	protein_coding	TRUE	RAB8B
chr15	cg07611606	ENSG00000278600	rs2903105	RP11-81A1.6	-6.74393	1.28911	1.68161e-07	0.116363	sense_intronic	TRUE	RP11-81A1.6
chr15	cg00225070	ENSG00000278600	rs5813998	RP11-81A1.6	-6.18082	1.13419	5.05023e-08	0.115263	sense_intronic	TRUE	RP11-81A1.6
chr15	cg23855392	ENSG00000278600	rs34375570	RP11-81A1.6	-2.45991	0.441697	2.55878e-08	0.0523728	sense_intronic	TRUE	RP11-81A1.6
chr16	cg15689738	ENSG00000186187	rs13337167	ZNRF1	-3.57272	0.615511	6.45651e-09	0.619047	protein_coding	TRUE	ZNRF1
chr16	cg03623401	ENSG00000234719	rs8050827	RP11-166B2.1	18.4827	3.33025	2.85766e-08	0.453579	protein_coding	TRUE	RP11-166B2.1
chr16	cg05335886	ENSG00000006007	rs6497357	GDE1	7.15762	1.251	1.05586e-08	0.0796577	protein_coding	TRUE	GDE1
chr17	cg12432006	ENSG00000133193	rs11544800	FAM104A	-5.27863	0.591357	4.40482e-19	0.957647	protein_coding	TRUE	FAM104A
chr17	cg20503109	ENSG00000163597	rs16967307	SNHG16	-46.4868	8.6421	7.4858e-08	0.924728	processed_transcript	TRUE	SNHG16
chr17	cg26576875	ENSG00000133193	rs1052706	FAM104A	-3.44167	0.411659	6.24588e-17	0.796984	protein_coding	TRUE	FAM104A
chr17	cg16548154	ENSG00000163597	rs16967307	SNHG16	-34.9965	4.97461	1.99241e-12	0.561719	processed_transcript	TRUE	SNHG16
chr17	cg24346909	ENSG00000166685	rs1466117	COG1	20.2035	3.9542	3.23247e-07	0.438021	protein_coding	TRUE	COG1
chr17	cg14243899	ENSG00000163597	rs16967307	SNHG16	-13.9411	1.75798	2.18866e-15	0.434991	processed_transcript	TRUE	SNHG16
chr17	cg26576875	ENSG00000141219	rs1052706	C17orf80	8.40517	0.824615	2.13439e-24	0.378399	protein_coding	TRUE	C17orf80
chr17	cg24321297	ENSG00000163597	rs16967307	SNHG16	-30.0071	4.06643	1.59212e-13	0.352548	processed_transcript	TRUE	SNHG16
chr17	cg12432006	ENSG00000141219	rs11544800	C17orf80	12.9726	1.14534	9.70572e-30	0.262535	protein_coding	TRUE	C17orf80
chr17	cg01818128	ENSG00000166685	rs1466117	COG1	-10.7309	1.6484	7.51923e-11	0.206222	protein_coding	TRUE	COG1
chr17	cg22579017	ENSG00000258472	rs2286519	RP11-192H23.4	-1.70462	0.288487	3.44534e-09	0.150778	protein_coding	TRUE	RP11-192H23.4
chr17	cg11394644	ENSG00000166685	rs35855827	COG1	-13.8041	2.04593	1.50864e-11	0.100843	protein_coding	TRUE	COG1
chr17	cg27370759	ENSG00000258472	rs2286519	RP11-192H23.4	-1.4604	0.242115	1.62087e-09	0.0827378	protein_coding	TRUE	RP11-192H23.4
chr17	cg12681669	ENSG00000258472	rs2286519	RP11-192H23.4	-1.43339	0.23492	1.05001e-09	0.0726755	protein_coding	TRUE	RP11-192H23.4
chr19	cg25619184	ENSG00000174652	rs4804429	ZNF266	65.7253	10.2131	1.23179e-10	0.596796	protein_coding	TRUE	ZNF266
chr19	cg25824543	ENSG00000105497	rs7245838	ZNF175	5.41509	1.08649	6.22721e-07	0.31779	protein_coding	TRUE	ZNF175
chr19	cg02380983	ENSG00000105507	rs138853548	CABP5	-468.552	83.0819	1.70398e-08	0.290291	protein_coding	TRUE	CABP5
chr19	cg05616010	ENSG00000121413	rs4420637	ZSCAN18	-27.5174	3.57331	1.35199e-14	0.223901	protein_coding	TRUE	ZSCAN18
chr19	cg19636302	ENSG00000125741	rs58193759	OPA3	-9.73099	1.85791	1.62685e-07	0.138198	protein_coding	TRUE	OPA3
chr19	cg04937172	ENSG00000105507	rs35439716	CABP5	-149.411	15.0418	2.98914e-23	0.0800795	protein_coding	TRUE	CABP5
chr2	cg16440984	ENSG00000134324	rs3795974	LPIN1	-177.424	30.4751	5.81681e-09	0.879447	protein_coding	TRUE	LPIN1
chr2	cg23692114	ENSG00000236209	rs7586613	AC104135.2	-1.33224	0.165068	6.98324e-16	0.853704	lincRNA	TRUE	AC104135.2
chr2	cg25654774	ENSG00000134324	rs3795974	LPIN1	-97.6047	17.3245	1.76158e-08	0.639212	protein_coding	TRUE	LPIN1
chr2	cg17186168	ENSG00000134324	rs56387825	LPIN1	43.2455	8.57495	4.57717e-07	0.37941	protein_coding	TRUE	LPIN1
chr2	cg17569203	ENSG00000236209	rs4330128	AC104135.2	-3.49523	0.618715	1.61227e-08	0.163971	lincRNA	TRUE	AC104135.2
chr2	cg15126615	ENSG00000236209	rs7586613	AC104135.2	-1.8219	0.26198	3.54266e-12	0.145178	lincRNA	TRUE	AC104135.2
chr20	cg19579117	ENSG00000198646	rs6087602	NCOA6	25.8837	3.87889	2.50703e-11	0.839726	protein_coding	TRUE	NCOA6
chr20	cg14335121	ENSG00000124104	rs10639182	SNX21	-4.70089	0.683691	6.16624e-12	0.754466	protein_coding	TRUE	SNX21
chr20	cg12287702	ENSG00000101191	rs143636883	DIDO1	-20.7421	4.08221	3.75266e-07	0.390368	protein_coding	TRUE	DIDO1
chr20	cg24467337	ENSG00000088305	rs6579030	DNMT3B	-5.48336	0.965006	1.32973e-08	0.189502	protein_coding	TRUE	DNMT3B
chr20	cg07237542	ENSG00000125814	rs3736755	NAPB	-230.298	40.8546	1.73031e-08	0.155395	protein_coding	TRUE	NAPB
chr20	cg22356976	ENSG00000125814	rs6048743	NAPB	-148.961	27.3854	5.34501e-08	0.110902	protein_coding	TRUE	NAPB
chr22	cg21330960	ENSG00000128266	rs9612218	GNAZ	-53.7352	10.7774	6.16659e-07	0.276891	protein_coding	TRUE	GNAZ
chr22	cg13252075	ENSG00000186951	rs135569	PPARA	-115.187	17.4476	4.0596e-11	0.276175	protein_coding	TRUE	PPARA
chr22	cg12198176	ENSG00000128266	rs11090217	GNAZ	-16.3933	2.6964	1.20414e-09	0.210766	protein_coding	TRUE	GNAZ
chr3	cg06820102	ENSG00000177311	rs1344672	ZBTB38	-13.687	2.29378	2.41603e-09	0.994203	protein_coding	TRUE	ZBTB38
chr3	cg03848978	ENSG00000177311	rs1344672	ZBTB38	-19.9222	3.23146	7.04472e-10	0.944943	protein_coding	TRUE	ZBTB38
chr3	cg11134956	ENSG00000196220	rs813606	SRGAP3	-28.2829	5.48597	2.52955e-07	0.937161	protein_coding	TRUE	SRGAP3
chr3	cg10394922	ENSG00000177311	rs1344672	ZBTB38	-33.2205	6.05909	4.18778e-08	0.921092	protein_coding	TRUE	ZBTB38
chr3	cg04352534	ENSG00000177311	rs13077048	ZBTB38	-10.8238	1.60344	1.47526e-11	0.87394	protein_coding	TRUE	ZBTB38
chr3	cg11421029	ENSG00000177311	rs13077048	ZBTB38	-13.5652	2.07777	6.63214e-11	0.870668	protein_coding	TRUE	ZBTB38
chr3	cg07672748	ENSG00000073792	rs11711477	IGF2BP2	-38.0914	6.82382	2.376e-08	0.756366	protein_coding	TRUE	IGF2BP2
chr3	cg02936049	ENSG00000177311	rs1344672	ZBTB38	-14.6166	2.30452	2.25945e-10	0.709756	protein_coding	TRUE	ZBTB38
chr3	cg22029806	ENSG00000114446	rs17231503	IFT57	8.63911	1.19658	5.20585e-13	0.663779	protein_coding	TRUE	IFT57
chr3	cg16706546	ENSG00000073792	rs5855073	IGF2BP2	-23.1826	3.28182	1.61838e-12	0.651169	protein_coding	TRUE	IGF2BP2
chr3	cg18495847	ENSG00000073792	rs35430985	IGF2BP2	-16.7778	2.2836	2.02527e-13	0.638968	protein_coding	TRUE	IGF2BP2
chr3	cg21380154	ENSG00000177311	rs1344672	ZBTB38	-16.9258	2.65136	1.72734e-10	0.603143	protein_coding	TRUE	ZBTB38
chr3	cg18349522	ENSG00000280739	rs11718621	EIF1B-AS1	-1.02908	0.206644	6.3597e-07	0.535804	processed_transcript	TRUE	EIF1B-AS1
chr3	cg11100080	ENSG00000073792	rs35430985	IGF2BP2	-17.7629	3.38138	1.49521e-07	0.530025	protein_coding	TRUE	IGF2BP2
chr3	cg03187166	ENSG00000114446	rs17231503	IFT57	4.77161	0.599545	1.73833e-15	0.523978	protein_coding	TRUE	IFT57
chr3	cg11741004	ENSG00000114446	rs17231503	IFT57	9.15379	1.32971	5.81659e-12	0.463514	protein_coding	TRUE	IFT57
chr3	cg23956648	ENSG00000073792	rs5855073	IGF2BP2	-17.7211	2.54599	3.39252e-12	0.360518	protein_coding	TRUE	IGF2BP2
chr3	cg13787933	ENSG00000177311	rs13069734	ZBTB38	-38.3466	7.31006	1.55659e-07	0.295545	protein_coding	TRUE	ZBTB38
chr3	cg08932533	ENSG00000114446	rs17231503	IFT57	3.9561	0.491042	7.84857e-16	0.268301	protein_coding	TRUE	IFT57
chr3	cg06806080	ENSG00000114446	rs17231503	IFT57	5.99076	0.749372	1.30225e-15	0.215265	protein_coding	TRUE	IFT57
chr3	cg12422228	ENSG00000114446	rs17231503	IFT57	6.97293	0.912813	2.19006e-14	0.203281	protein_coding	TRUE	IFT57
chr3	cg08787647	ENSG00000163913	rs149948721	IFT122	6.05978	1.18422	3.10284e-07	0.181756	protein_coding	TRUE	IFT122
chr3	cg02487233	ENSG00000114446	rs17231503	IFT57	8.9881	1.24714	5.72114e-13	0.160191	protein_coding	TRUE	IFT57
chr3	cg24332767	ENSG00000156931	rs6444035	VPS8	-22.4182	3.46797	1.01731e-10	0.146753	protein_coding	TRUE	VPS8
chr3	cg00492070	ENSG00000114446	rs17231503	IFT57	6.54432	0.844728	9.39029e-15	0.140634	protein_coding	TRUE	IFT57
chr3	cg01500877	ENSG00000114503	rs7433167	NCBP2	-12.3296	1.82407	1.38561e-11	0.118508	protein_coding	TRUE	NCBP2
chr3	cg22826874	ENSG00000163710	rs4683702	PCOLCE2	-5.21304	0.581772	3.22857e-19	0.100154	protein_coding	TRUE	PCOLCE2
chr3	cg21503504	ENSG00000196220	rs586499	SRGAP3	-11.199	1.93938	7.71851e-09	0.0970651	protein_coding	TRUE	SRGAP3
chr3	cg16516295	ENSG00000163913	rs112016935	IFT122	5.42319	0.942186	8.6151e-09	0.0776359	protein_coding	TRUE	IFT122
chr3	cg08049441	ENSG00000163913	rs112016935	IFT122	5.44298	0.945851	8.68581e-09	0.0538794	protein_coding	TRUE	IFT122
chr3	cg03040360	ENSG00000114446	rs17231503	IFT57	-27.8079	4.9455	1.87812e-08	0.050447	protein_coding	TRUE	IFT57
chr4	cg00563678	ENSG00000170153	rs78038613	RNF150	-106.182	17.9884	3.57397e-09	0.779521	protein_coding	TRUE	RNF150
chr4	cg26807632	ENSG00000170153	rs2220344	RNF150	-76.949	14.2084	6.10415e-08	0.665863	protein_coding	TRUE	RNF150
chr4	cg11427455	ENSG00000170153	rs78038613	RNF150	-76.4406	13.1426	6.01788e-09	0.575983	protein_coding	TRUE	RNF150
chr4	cg06435920	ENSG00000109519	rs9986037	GRPEL1	-38.852	7.66438	3.99563e-07	0.293504	protein_coding	TRUE	GRPEL1
chr4	cg24044084	ENSG00000109572	rs7696352	CLCN3	-27.9906	4.6153	1.32169e-09	0.183361	protein_coding	TRUE	CLCN3
chr4	cg26479374	ENSG00000090316	rs2199956	MAEA	3.73608	0.625966	2.39433e-09	0.0904339	protein_coding	TRUE	MAEA
chr5	cg04869206	ENSG00000164327	rs35476737	RICTOR	112.622	18.378	8.89406e-10	0.848398	protein_coding	TRUE	RICTOR
chr5	cg05015628	ENSG00000164327	rs13184911	RICTOR	-88.0808	11.8115	8.83669e-14	0.266037	protein_coding	TRUE	RICTOR
chr6	cg21668832	ENSG00000079691	rs2744254	LRRC16A	-1.09066	0.151824	6.78498e-13	0.741205	protein_coding	TRUE	LRRC16A
chr6	cg08579663	ENSG00000137274	rs11963805	BPHL	-1.62122	0.322732	5.07565e-07	0.734859	protein_coding	TRUE	BPHL
chr6	cg01356548	ENSG00000137274	rs11961780	BPHL	1.37007	0.278506	8.6835e-07	0.613402	protein_coding	TRUE	BPHL
chr6	cg07838230	ENSG00000112365	rs9398202	ZBTB24	7.8332	1.34575	5.85988e-09	0.237778	protein_coding	TRUE	ZBTB24
chr6	cg04623147	ENSG00000213066	rs11399450	FGFR1OP	-15.4033	2.33987	4.61123e-11	0.16577	protein_coding	TRUE	FGFR1OP
chr7	cg10089657	ENSG00000164849	rs143361185	GPR146	-5.17023	0.866432	2.41272e-09	0.566266	protein_coding	TRUE	GPR146
chr7	cg02184386	ENSG00000164849	rs884977	GPR146	-7.1434	1.36928	1.8193e-07	0.393544	protein_coding	TRUE	GPR146
chr7	cg16218477	ENSG00000164849	rs884977	GPR146	-2.24317	0.287821	6.50991e-15	0.377845	protein_coding	TRUE	GPR146
chr7	cg04816311	ENSG00000164849	rs884977	GPR146	-5.25898	0.792017	3.13722e-11	0.290207	protein_coding	TRUE	GPR146
chr7	cg26619215	ENSG00000164543	rs10247825	STK17A	2.76593	0.517165	8.88122e-08	0.287846	protein_coding	TRUE	STK17A
chr8	cg07622412	ENSG00000120910	rs10094778	PPP3CC	-33.5484	6.30993	1.05629e-07	0.925008	protein_coding	TRUE	PPP3CC
chr8	cg26101170	ENSG00000254093	rs56057779	PINX1	1.2034	0.232376	2.23446e-07	0.893068	protein_coding	TRUE	PINX1
chr8	cg27411982	ENSG00000254093	rs4841407	PINX1	-7.01312	1.39178	4.68095e-07	0.76761	protein_coding	TRUE	PINX1
chr8	cg25654652	ENSG00000120910	rs2249098	PPP3CC	-8.26592	1.40208	3.73642e-09	0.187236	protein_coding	TRUE	PPP3CC
chr8	cg13236298	ENSG00000246477	rs7816606	AF131216.6	-214.278	41.2168	2.00584e-07	0.149857	antisense	TRUE	AF131216.6
chr8	cg06282530	ENSG00000253716	rs13272454	MINCR	3.70461	0.645859	9.69731e-09	0.127006	antisense	TRUE	MINCR
chr8	cg21775007	ENSG00000246477	rs6601582	AF131216.6	-26.3456	2.81851	8.98829e-21	0.101146	antisense	TRUE	AF131216.6
chr11	cg17020635	ENSG00000084207	rs7108149	GSTP1	-57.5546	7.21548	1.50496e-15	0.199189	protein_coding	TRUE	GSTP1
