# Supplementary material for: QTL mapping of human retina DNA methylation identifies 87 gene-epigenome interactions in age-related macular degeneration
Source: Research Square preprint supplement (doi:10.21203/rs.3.rs-3011096/v1), 2023-06-16
Supplement: Supplementary file 94 [file Supplementary_Table39.xlsx]

## Sheet: Sheet1
Gene_symbol	Loci	Method identified
MEPCE	PILRB/PILRA	SMR
DMBT1	ARMS2/HTRA1	SMR
HTRA1	ARMS2/HTRA1	SMR
ZCWPW1	PILRB/PILRA	SMR
CFH	CFH	eCAVIAR
LINC01004	KMT2E/SRPK2	eCAVIAR
ARHGAP21	ARHGAP21	eCAVIAR
RAD51B	RAD51B	eCAVIAR
MARK4	APOE(EXOC3L2/MARK4)	eCAVIAR
GPR108	C3	eCAVIAR
SLC12A5	MMP9	eCAVIAR
BAIAP2L2	SLC16A8	eCAVIAR
RNA5SP305	ARHGAP21	eCAVIAR
MIR6791	C3	eCAVIAR
TRIP10	C3	eCAVIAR
SLC16A8	MMP9	eCAVIAR
LGALS1	SLC16A8	eCAVIAR
GCAT	SLC16A8	eCAVIAR
DDX17	SLC16A8	eCAVIAR
MAN1C1	-	Coloc
MOBKL3	-	Coloc
TCTE1	VEGFA	Coloc
KIFC1	-	Coloc
AARS2	VEGFA	Coloc
DAXX	C2/CFB/SKIV2L	Coloc
CCHCR1	C2/CFB/SKIV2L	Coloc
COL11A2	C2/CFB/SKIV2L	Coloc
CUTA	-	Coloc
BAT1	-	Coloc
TRIM26	-	Coloc
ZBTB12	-	Coloc
HCG9	-	Coloc
NOTCH4	-	Coloc
MUC12	PILRB/PILRA	Coloc
MOSPD3	PILRB/PILRA	Coloc
LAMTOR4	PILRB/PILRA	Coloc
ZAN	PILRB/PILRA	Coloc
SMURF1	-	Coloc
ZKSCAN1	PILRB/PILRA	Coloc
PLOD3	PILRB/PILRA	Coloc
C8orf58	TNFRSF10A	Coloc
PDZD7	-	Coloc
CPN1	-	Coloc
ESYT1	-	Coloc
SARNP	RDH5/CD63	Coloc
GDF11	RDH5/CD63	Coloc
PPM1A	-	Coloc
RTN1	-	Coloc
TRPM1	-	Coloc
LOC101929076	-	Coloc
CCDC33	-	Coloc
C17orf55	NPLOC4/TSPAN10	Coloc
RNF157	-	Coloc
NLK	TMEM97/VTN	Coloc
FN3KRP	-	Coloc
BAIAP2	NPLOC4/TSPAN10	Coloc
SLC16A3	NPLOC4/TSPAN10	Coloc
NPLOC4	-	Coloc
BAHCC1	NPLOC4/TSPAN10	Coloc
ABR	-	Coloc
RPTOR	NPLOC4/TSPAN10	Coloc
PNPLA6	C3	Coloc
OPA3	-	Coloc
LIG1	-	Coloc
MIER2	CNN2	Coloc
SCAMP4	CNN2	Coloc
SCAF1	-	Coloc
RPL13AP5	-	Coloc
TEAD2	-	Coloc
FUT3	-	Coloc
C19orf20	CNN2	Coloc
LMTK3	-	Coloc
MLLT1	C3 (NRTN/FUT6)	Coloc
ZNF235	APOE	Coloc
CAPS	-	Coloc
POLRMT	CNN2	Coloc
MCEMP1	C3	Coloc
DXO	C2/CFB/SKIV2L	Moloc
AP4M1	PILRB/PILRA	Moloc
KMT5A	-	Moloc
MTMR10	-	Moloc
MPI	-	Moloc
EHD4	-	Moloc
CPLX4	-	Moloc
KASH5	-	Moloc
TMEM259	CNN2	Moloc
SNX21	-	Moloc
