# Supplementary material for: QTL mapping of human retina DNA methylation identifies 87 gene-epigenome interactions in age-related macular degeneration
Source: Research Square preprint supplement (doi:10.21203/rs.3.rs-3011096/v1), 2023-06-16
Supplement: Supplementary file 109 [file Supplementary_Table8.xlsx]

## Sheet: eQTMs
Gene_ID	CpG	Gene_symbol	Chr	beta	se	p.value	FDR	Distance	Correlation	Biotype
ENSG00000224616	cg25213402	RTCA-AS1	chr1	7.40652	0.180914	1.57e-72	2.76e-68	-2236	Negative	antisense
ENSG00000177788	cg05469530	RP5-1061H20.4	chr1	4.20388	0.124148	3.57e-59	7.84e-56	225311	Positive	lincRNA
ENSG00000213062	cg26667792	RP1-206D15.6	chr1	3.19052	0.103833	2.17e-57	2.72e-54	-100431	Positive	lincRNA
ENSG00000117862	cg05923103	TXNDC12	chr1	-9.79942	0.352306	1.56e-49	6.23e-47	-784220	Positive	protein_coding
ENSG00000107404	cg08470185	DVL1	chr1	-29.8337	1.1663	4.26e-48	1.31e-45	64142	Negative	protein_coding
ENSG00000283580	cg24483304	RP5-994D16.12	chr1	1.00867	0.0366901	1.67e-46	4.13e-44	-622159	Positive	protein_coding
ENSG00000197530	cg15042692	MIB2	chr1	-22.234	0.827659	5.67e-46	1.26e-43	307335	Positive	protein_coding
ENSG00000224051	cg15042692	CPTP	chr1	-4.26356	0.161693	2.51e-45	4.64e-43	16676	Negative	protein_coding
ENSG00000243970	cg08648409	PPIEL	chr1	-17.2031	0.646675	2.09e-44	3.37e-42	-648772	Negative	unprocessed_pseudogene
ENSG00000173660	cg24325883	UQCRH	chr1	-35.5503	1.43092	9.91e-44	1.43e-41	56069	Negative	protein_coding
ENSG00000116544	cg18881764	DLGAP3	chr1	7.11778	0.315578	1.8e-41	1.78e-39	692890	Positive	protein_coding
ENSG00000197785	cg12655137	ATAD3A	chr1	-6.32047	0.272598	4.42e-40	3.72e-38	-165798	Negative	protein_coding
ENSG00000256029	cg04563953	RP11-190A12.7	chr1	3.00574	0.127348	1.57e-39	1.2e-37	508665	Positive	protein_coding
ENSG00000273213	cg18395499	RP5-998N21.10	chr1	1.79445	0.0858642	6.88e-39	5e-37	-194684	Negative	processed_transcript
ENSG00000132680	cg11572390	KIAA0907	chr1	-53.1411	2.35695	3.21e-38	2.18e-36	370101	Negative	protein_coding
ENSG00000126705	cg11335495	AHDC1	chr1	-23.5468	1.11672	3.28e-37	1.91e-35	-643599	Negative	protein_coding
ENSG00000162441	cg09174674	LZIC	chr1	12.1813	0.585202	3.68e-37	2.13e-35	-98129	Positive	protein_coding
ENSG00000157933	cg17444015	SKI	chr1	16.2018	0.735637	6.15e-37	3.43e-35	-163223	Positive	protein_coding
ENSG00000160094	cg17716617	ZNF362	chr1	-10.6131	0.440763	9.33e-37	5.11e-35	502513	Positive	protein_coding
ENSG00000116251	cg05895952	RPL22	chr1	120.613	5.79425	1.23e-36	6.67e-35	14613	Positive	protein_coding
ENSG00000121753	cg10773309	ADGRB2	chr1	12.5841	0.589309	2.15e-36	1.13e-34	36693	Negative	protein_coding
ENSG00000162599	cg11919778	NFIA	chr1	11.2948	0.580114	7.79e-36	3.78e-34	738399	Positive	protein_coding
ENSG00000131591	cg15042692	C1orf159	chr1	-4.14987	0.196162	8.51e-36	4.1e-34	226262	Negative	protein_coding
ENSG00000116871	cg18881764	MAP7D1	chr1	28.9852	1.44083	1.82e-35	8.44e-34	597253	Negative	protein_coding
ENSG00000240038	cg10951786	AMY2B	chr1	-57.3905	3.13149	4.24e-35	1.88e-33	27834	Positive	protein_coding
ENSG00000160087	cg12655137	UBE2J2	chr1	-6.67133	0.329383	4.67e-35	2.06e-33	424040	Positive	protein_coding
ENSG00000185946	cg10951786	RNPC3	chr1	-44.8172	2.54267	1.4e-34	5.78e-33	-290	Positive	protein_coding
ENSG00000188004	cg14416284	C1orf204	chr1	-2.27834	0.107691	1.6e-34	6.59e-33	264224	Negative	protein_coding
ENSG00000215906	cg07155211	LACTBL1	chr1	6.21307	0.309775	2.39e-34	9.57e-33	416089	Positive	protein_coding
ENSG00000157216	cg00756215	SSBP3	chr1	-43.5902	2.12213	4.5e-34	1.73e-32	538952	Negative	protein_coding
ENSG00000270605	cg10110780	RP5-1092A3.4	chr1	-2.83706	0.140254	9.42e-34	3.45e-32	7119	Negative	antisense
ENSG00000269934	cg19233769	RP5-1139B12.3	chr1	-0.965284	0.0435873	9.92e-34	3.61e-32	-156061	Negative	antisense
ENSG00000023572	cg13543544	GLRX2	chr1	2.81821	0.145772	1.21e-33	4.34e-32	-29771	Positive	protein_coding
ENSG00000143486	cg22048546	EIF2D	chr1	-11.0101	0.573168	1.59e-33	5.62e-32	750079	Negative	protein_coding
ENSG00000272145	cg25275331	NFYC-AS1	chr1	-1.61451	0.0861589	1.66e-33	5.85e-32	-432117	Positive	antisense
ENSG00000143862	cg23214606	ARL8A	chr1	-15.2334	0.743327	2.17e-33	7.55e-32	873919	Negative	protein_coding
ENSG00000162585	cg17444015	FAAP20	chr1	10.1986	0.502263	2.46e-33	8.46e-32	207081	Positive	protein_coding
ENSG00000205090	cg17444015	TMEM240	chr1	1.93007	0.0979707	4.13e-33	1.37e-31	856764	Positive	protein_coding
ENSG00000215908	cg14644471	CROCCP2	chr1	-24.031	1.17967	5.64e-33	1.81e-31	-506224	Negative	transcribed_unprocessed_pseudogene
ENSG00000188976	cg12655137	NOC2L	chr1	-17.934	0.937209	8.42e-33	2.61e-31	733746	Negative	protein_coding
ENSG00000116786	cg11141156	PLEKHM2	chr1	14.8929	0.826699	1.01e-32	3.1e-31	759528	Positive	protein_coding
ENSG00000220323	cg19583621	HIST2H2BD	chr1	-15.8978	0.723052	1.91e-32	5.69e-31	-306947	Negative	processed_pseudogene
ENSG00000228063	cg12668928	LYPLAL1-AS1	chr1	0.478683	0.0251979	4.03e-32	1.16e-30	-811548	Negative	antisense
ENSG00000116679	cg00816620	IVNS1ABP	chr1	-20.8373	1.18023	7.82e-32	2.16e-30	-138019	Positive	protein_coding
ENSG00000236263	cg00660163	RP11-263K19.6	chr1	-0.888031	0.0445793	1.47e-31	3.96e-30	871570	Negative	antisense
ENSG00000116685	cg00449251	KIAA2013	chr1	-6.30691	0.346757	5.45e-31	1.38e-29	-238248	Negative	protein_coding
ENSG00000229739	cg17608619	RP11-295K2.3	chr1	1.30743	0.07237	5.89e-31	1.48e-29	-1053329	Positive	antisense
ENSG00000176022	cg12655137	B3GALT6	chr1	-3.25774	0.175025	9.58e-31	2.35e-29	-445712	Negative	protein_coding
ENSG00000188157	cg15042692	AGRN	chr1	-14.0776	0.74679	1.09e-30	2.66e-29	-287960	Negative	protein_coding
ENSG00000131584	cg08470185	ACAP3	chr1	-72.7702	3.87312	1.91e-30	4.57e-29	107028	Positive	protein_coding
ENSG00000236782	cg11335495	RP11-96L14.7	chr1	-35.8873	1.92411	2.41e-30	5.66e-29	720920	Negative	protein_coding
ENSG00000233396	cg22690212	RP11-458D21.1	chr1	3.19251	0.170375	2.56e-30	5.99e-29	55933	Positive	lincRNA
ENSG00000234741	cg21384371	GAS5	chr1	-9.20805	0.533737	3.17e-30	7.35e-29	-34167	Negative	processed_transcript
ENSG00000244716	cg27014642	RP11-20O24.4	chr1	-0.851542	0.0491707	3.62e-30	8.34e-29	-256935	Negative	processed_pseudogene
ENSG00000277726	cg19955419	RP4-635E18.9	chr1	-1.88671	0.100403	4.07e-30	9.29e-29	801985	Negative	protein_coding
ENSG00000154358	cg11161882	OBSCN	chr1	26.6728	1.52972	9.94e-30	2.16e-28	-198948	Negative	protein_coding
ENSG00000120948	cg00449251	TARDBP	chr1	65.5151	3.60311	1.03e-29	2.23e-28	-668999	Positive	protein_coding
ENSG00000116793	cg27077219	PHTF1	chr1	15.0501	0.846013	1.85e-29	3.89e-28	-846873	Negative	protein_coding
ENSG00000162729	cg04122068	IGSF8	chr1	15.3876	0.920495	2.85e-29	5.91e-28	7374	Positive	protein_coding
ENSG00000122417	cg15833339	ODF2L	chr1	-31.4681	1.94973	9e-29	1.79e-27	49766	Negative	protein_coding
ENSG00000143420	cg00438783	ENSA	chr1	38.2151	2.14153	9.39e-29	1.86e-27	-85100	Positive	protein_coding
ENSG00000130764	cg09857070	LRRC47	chr1	9.29561	0.535571	9.75e-29	1.92e-27	-872223	Negative	protein_coding
ENSG00000271383	cg01464052	NBPF19	chr1	-30.7337	1.87667	1.14e-28	2.23e-27	-807389	Negative	protein_coding
ENSG00000130695	cg19781348	CEP85	chr1	-9.22237	0.522695	1.62e-28	3.12e-27	-920997	Negative	protein_coding
ENSG00000116649	cg11857246	SRM	chr1	5.15147	0.296959	3.15e-28	5.85e-27	626749	Positive	protein_coding
ENSG00000229956	cg12312700	ZRANB2-AS2	chr1	0.693619	0.0429519	3.86e-28	7.06e-27	-98	Positive	processed_transcript
ENSG00000169905	cg09032840	TOR1AIP2	chr1	19.2442	1.09909	4.91e-28	8.91e-27	41917	Negative	protein_coding
ENSG00000187017	cg00069017	ESPN	chr1	104.215	6.19987	5.12e-28	9.25e-27	433196	Positive	protein_coding
ENSG00000134248	cg10174611	LAMTOR5	chr1	-11.9709	0.712226	5.85e-28	1.05e-26	364984	Negative	protein_coding
ENSG00000233954	cg27555392	UQCRHL	chr1	-4.3028	0.261225	8.04e-28	1.43e-26	545428	Negative	protein_coding
ENSG00000157911	cg05753589	PEX10	chr1	7.68112	0.415494	8.74e-28	1.55e-26	-270638	Positive	protein_coding
ENSG00000158008	cg10563103	EXTL1	chr1	-3.96296	0.237213	1.31e-27	2.29e-26	13825	Negative	protein_coding
ENSG00000116809	cg22391883	ZBTB17	chr1	-10.2464	0.602831	1.65e-27	2.85e-26	295363	Positive	protein_coding
ENSG00000116497	cg17716617	S100PBP	chr1	9.50723	0.561967	1.97e-27	3.39e-26	62788	Positive	protein_coding
ENSG00000058673	cg11386686	ZC3H11A	chr1	-65.1082	3.78062	1.99e-27	3.42e-26	490285	Positive	protein_coding
ENSG00000067606	cg12655137	PRKCZ	chr1	-15.5589	0.8927	2.03e-27	3.48e-26	372462	Negative	protein_coding
ENSG00000231999	cg04009514	FLJ27354	chr1	1.50669	0.086325	2.23e-27	3.81e-26	-933846	Positive	antisense
ENSG00000241014	cg07243241	RP11-244H3.1	chr1	-1.37931	0.086457	2.38e-27	4.03e-26	103905	Negative	processed_transcript
ENSG00000117154	cg24379252	IGSF21	chr1	13.557	0.76795	2.94e-27	4.95e-26	-533117	Positive	protein_coding
ENSG00000162572	cg10756715	SCNN1D	chr1	8.21445	0.484181	4.05e-27	6.72e-26	-335709	Positive	protein_coding
ENSG00000189409	cg23537515	MMP23B	chr1	-1.96655	0.111865	4.8e-27	7.88e-26	210554	Negative	protein_coding
ENSG00000078808	cg27503832	SDF4	chr1	-26.0504	1.57385	5.74e-27	9.38e-26	149028	Negative	protein_coding
ENSG00000188807	cg19368966	TMEM201	chr1	13.9656	0.8577	8.54e-27	1.36e-25	-809888	Positive	protein_coding
ENSG00000187961	cg27503832	KLHL17	chr1	-4.3923	0.273222	9.88e-27	1.57e-25	-405352	Negative	protein_coding
ENSG00000090686	cg24221413	USP48	chr1	35.8396	2.19631	2.61e-26	3.94e-25	-993103	Positive	protein_coding
ENSG00000159409	cg22682031	CELF3	chr1	-62.8281	3.83328	3.48e-26	5.18e-25	-89870	Negative	protein_coding
ENSG00000272668	cg24580655	RP11-190A12.8	chr1	7.50842	0.421513	4.74e-26	6.95e-25	679022	Positive	antisense
ENSG00000143376	cg16909824	SNX27	chr1	14.5339	0.941609	5.45e-26	7.95e-25	285044	Positive	protein_coding
ENSG00000058453	cg27555392	CROCC	chr1	88.1714	5.27147	7.09e-26	1.02e-24	387676	Positive	protein_coding
ENSG00000117118	cg15644938	SDHB	chr1	10.1524	0.619722	7.73e-26	1.11e-24	-666063	Positive	protein_coding
ENSG00000248333	cg05753589	CDK11B	chr1	11.7894	0.673295	8.57e-26	1.22e-24	498099	Negative	protein_coding
ENSG00000234807	cg23656542	LINC01135	chr1	1.06344	0.0615048	8.94e-26	1.27e-24	-974712	Positive	lincRNA
ENSG00000182873	cg04637864	RP11-181G12.2	chr1	-1.85754	0.120957	1.28e-25	1.8e-24	-606835	Negative	antisense
ENSG00000134744	cg02626152	ZCCHC11	chr1	-34.2431	2.135	1.32e-25	1.85e-24	-417474	Negative	protein_coding
ENSG00000169972	cg08470185	PUSL1	chr1	-2.71976	0.169176	1.33e-25	1.86e-24	-90821	Positive	protein_coding
ENSG00000198400	cg11572390	NTRK1	chr1	5.17091	0.331109	1.45e-25	2.02e-24	532494	Positive	protein_coding
ENSG00000131778	cg11497794	CHD1L	chr1	-8.17769	0.545874	1.65e-25	2.28e-24	-298573	Positive	protein_coding
ENSG00000121766	cg17517854	ZCCHC17	chr1	-7.82442	0.490631	1.74e-25	2.4e-24	-882740	Negative	protein_coding
ENSG00000143126	cg01416227	CELSR2	chr1	47.4902	3.06755	1.78e-25	2.45e-24	-234624	Negative	protein_coding
ENSG00000273373	cg01416227	RP5-1074L1.4	chr1	-9.12773	0.574327	2.46e-25	3.31e-24	885991	Negative	antisense
ENSG00000160685	cg11750116	ZBTB7B	chr1	8.61483	0.544307	2.81e-25	3.76e-24	-82336	Positive	protein_coding
ENSG00000117697	cg23834779	NSL1	chr1	4.86827	0.306448	3.01e-25	4.02e-24	-690764	Negative	protein_coding
ENSG00000081692	cg13295432	JMJD4	chr1	-4.41287	0.284772	4.2e-25	5.54e-24	375180	Negative	protein_coding
ENSG00000274265	cg19583621	CH17-189H20.1	chr1	-2.15137	0.142244	7.75e-25	9.89e-24	-974074	Positive	lincRNA
ENSG00000134375	cg05923618	TIMM17A	chr1	-12.7282	0.814067	9.75e-25	1.23e-23	931729	Negative	protein_coding
ENSG00000171161	cg14360852	ZNF672	chr1	7.03599	0.48053	9.82e-25	1.24e-23	-68024	Negative	protein_coding
ENSG00000000460	cg06185140	C1orf112	chr1	-6.35229	0.405965	1.29e-24	1.61e-23	-1009606	Negative	protein_coding
ENSG00000162385	cg26832062	MAGOH	chr1	3.4126	0.219696	1.81e-24	2.22e-23	611279	Positive	protein_coding
ENSG00000261326	cg26628511	LINC01355	chr1	22.3847	1.49878	2.44e-24	2.97e-23	-261921	Negative	lincRNA
ENSG00000136631	cg00438783	VPS45	chr1	12.0016	0.802163	2.73e-24	3.3e-23	-448472	Negative	protein_coding
ENSG00000117153	cg11386686	KLHL12	chr1	-8.40691	0.542946	2.74e-24	3.31e-23	414253	Negative	protein_coding
ENSG00000117632	cg14017991	STMN1	chr1	90.6109	6.31871	3.96e-24	4.71e-23	350108	Negative	protein_coding
ENSG00000090020	cg11335495	SLC9A1	chr1	-14.5767	0.945221	5.25e-24	6.19e-23	-208373	Positive	protein_coding
ENSG00000132676	cg18613283	DAP3	chr1	17.4419	1.09647	5.7e-24	6.69e-23	636777	Positive	protein_coding
ENSG00000175756	cg12655137	AURKAIP1	chr1	-12.8282	0.779596	5.75e-24	6.73e-23	304219	Positive	protein_coding
ENSG00000122406	cg05670835	RPL5	chr1	-53.3099	3.71355	7.13e-24	8.21e-23	-615957	Negative	protein_coding
ENSG00000235363	cg09085216	SNRPGP10	chr1	-0.38267	0.0239863	7.94e-24	9.09e-23	991294	Positive	processed_pseudogene
ENSG00000259943	cg05919460	RP1-39G22.7	chr1	14.1376	0.933703	8.07e-24	9.23e-23	-680088	Positive	antisense
ENSG00000249087	cg15741766	ZNF436-AS1	chr1	-3.51969	0.23897	8.18e-24	9.35e-23	-590154	Negative	antisense
ENSG00000204060	cg17908818	FOXO6	chr1	1.31279	0.0899368	8.37e-24	9.56e-23	987401	Negative	protein_coding
ENSG00000162426	cg19060601	SLC45A1	chr1	3.00755	0.205203	1.02e-23	1.16e-22	-208118	Negative	protein_coding
ENSG00000117450	cg27223543	PRDX1	chr1	-42.5857	2.89533	1.03e-23	1.17e-22	-878583	Negative	protein_coding
ENSG00000143315	cg08038078	PIGM	chr1	11.9539	0.752937	1.12e-23	1.26e-22	7351	Positive	protein_coding
ENSG00000142634	cg14793291	EFHD2	chr1	-7.95239	0.503194	1.33e-23	1.49e-22	-439676	Negative	protein_coding
ENSG00000197622	cg00438783	CDC42SE1	chr1	21.3447	1.31393	1.38e-23	1.54e-22	-535220	Positive	protein_coding
ENSG00000127124	cg10200609	HIVEP3	chr1	5.53677	0.358095	1.49e-23	1.66e-22	1177081	Positive	protein_coding
ENSG00000075391	cg25631060	RASAL2	chr1	-43.4246	3.03515	1.53e-23	1.7e-22	929318	Positive	protein_coding
ENSG00000143198	cg10364513	MGST3	chr1	-11.2266	0.762043	1.62e-23	1.79e-22	186071	Positive	protein_coding
ENSG00000179085	cg11750116	DPM3	chr1	2.06653	0.140908	1.77e-23	1.95e-22	-54925	Positive	protein_coding
ENSG00000171603	cg19368966	CLSTN1	chr1	211.834	14.58	1.81e-23	1.99e-22	669773	Negative	protein_coding
ENSG00000007923	cg05895952	DNAJC11	chr1	-14.4307	0.980973	1.82e-23	2e-22	-434535	Positive	protein_coding
ENSG00000262180	cg22265501	OCLM	chr1	-0.393918	0.0283614	1.85e-23	2.03e-22	-584992	Negative	protein_coding
ENSG00000120333	cg12530192	MRPS14	chr1	-4.09118	0.288354	2.18e-23	2.37e-22	-218809	Negative	protein_coding
ENSG00000143552	cg13328788	NUP210L	chr1	-0.892869	0.0423218	2.36e-23	2.56e-22	161927	Negative	protein_coding
ENSG00000185278	cg12530192	ZBTB37	chr1	-31.8801	2.23085	2.57e-23	2.78e-22	-923898	Positive	protein_coding
ENSG00000162384	cg26832062	C1orf123	chr1	7.48902	0.505778	3.09e-23	3.3e-22	624080	Positive	protein_coding
ENSG00000143294	cg09477492	PRCC	chr1	-24.1341	1.64079	4.89e-23	5.15e-22	-16712	Negative	protein_coding
ENSG00000234975	cg19233769	FTH1P2	chr1	0.67841	0.0462292	4.96e-23	5.22e-22	605235	Positive	processed_pseudogene
ENSG00000066136	cg11386025	NFYC	chr1	4.87427	0.333467	5.08e-23	5.33e-22	-127262	Positive	protein_coding
ENSG00000160075	cg15323084	SSU72	chr1	14.9085	0.998105	6.5e-23	6.74e-22	79654	Positive	protein_coding
ENSG00000159363	cg22391883	ATP13A2	chr1	-60.7914	4.07859	6.51e-23	6.75e-22	-748726	Positive	protein_coding
ENSG00000143643	cg27519395	TTC13	chr1	-6.85734	0.488468	8.26e-23	8.44e-22	-37205	Negative	protein_coding
ENSG00000055070	cg18117094	SZRD1	chr1	-15.1653	1.04835	8.35e-23	8.53e-22	-561319	Negative	protein_coding
ENSG00000117360	cg16909824	PRPF3	chr1	-26.0289	1.64941	8.36e-23	8.53e-22	-1005483	Positive	protein_coding
ENSG00000162402	cg00756215	USP24	chr1	32.6236	2.17606	8.38e-23	8.55e-22	-301975	Positive	protein_coding
ENSG00000143793	cg13295432	C1orf35	chr1	-7.46849	0.494386	8.73e-23	8.89e-22	4879	Negative	protein_coding
ENSG00000116478	cg10773309	HDAC1	chr1	-5.32819	0.348753	8.78e-23	8.94e-22	528273	Positive	protein_coding
ENSG00000228502	cg15454523	EEF1A1P11	chr1	1.25966	0.0860179	1.14e-22	1.15e-21	793056	Positive	processed_pseudogene
ENSG00000250575	cg15042692	RP4-669L17.8	chr1	-2.95875	0.190127	1.28e-22	1.28e-21	816855	Positive	unprocessed_pseudogene
ENSG00000158292	cg25225169	GPR153	chr1	11.854	0.742656	1.9e-22	1.87e-21	-255081	Positive	protein_coding
ENSG00000157870	cg17444015	FAM213B	chr1	8.30553	0.559769	2.21e-22	2.17e-21	194949	Negative	protein_coding
ENSG00000241975	cg10101470	TCEB1P19	chr1	1.02009	0.0771194	2.67e-22	2.59e-21	-991972	Positive	processed_pseudogene
ENSG00000011009	cg26737766	LYPLA2	chr1	-11.0291	0.763119	3.05e-22	2.94e-21	-9668	Positive	protein_coding
ENSG00000250135	cg17738504	RP4-622L5.2	chr1	-0.919759	0.0616638	3.27e-22	3.13e-21	431395	Negative	sense_intronic
ENSG00000162613	cg12655452	FUBP1	chr1	-42.6915	3.14879	3.87e-22	3.68e-21	-724646	Negative	protein_coding
ENSG00000143443	cg13841804	C1orf56	chr1	-2.27157	0.148643	3.92e-22	3.73e-21	812621	Negative	protein_coding
ENSG00000271092	cg20634476	TMEM56-RWDD3	chr1	-0.997239	0.0700258	5.73e-22	5.35e-21	-190957	Negative	protein_coding
ENSG00000149527	cg01755342	PLCH2	chr1	-257.411	16.778	5.79e-22	5.4e-21	512023	Negative	protein_coding
ENSG00000069248	cg01582104	NUP133	chr1	26.2244	1.86323	5.83e-22	5.44e-21	118590	Positive	protein_coding
ENSG00000169598	cg12524640	DFFB	chr1	5.35812	0.38622	6.04e-22	5.62e-21	790775	Negative	protein_coding
ENSG00000121905	cg17517854	HPCA	chr1	16.7022	1.12988	7.3e-22	6.72e-21	706272	Positive	protein_coding
ENSG00000162735	cg14978267	PEX19	chr1	-12.2412	0.872558	7.4e-22	6.81e-21	889021	Negative	protein_coding
ENSG00000215790	cg15042692	SLC35E2	chr1	-18.3824	1.08111	7.82e-22	7.18e-21	-416758	Negative	protein_coding
ENSG00000137947	cg21497833	GTF2B	chr1	-3.29041	0.239032	9.43e-22	8.58e-21	630818	Negative	protein_coding
ENSG00000162909	cg09703732	CAPN2	chr1	-11.08	0.803637	9.54e-22	8.66e-21	988798	Negative	protein_coding
ENSG00000137955	cg17556056	RABGGTB	chr1	-12.3483	0.902737	1.66e-21	1.47e-20	552644	Negative	protein_coding
ENSG00000270231	cg04857033	NBPF8	chr1	18.0035	1.37606	2.08e-21	1.82e-20	704061	Negative	unprocessed_pseudogene
ENSG00000237094	cg15130241	RP4-669L17.10	chr1	-6.68808	0.481092	2.44e-21	2.12e-20	1034045	Negative	lincRNA
ENSG00000203965	cg09208651	EFCAB7	chr1	-6.18463	0.456343	3.09e-21	2.66e-20	-720387	Negative	protein_coding
ENSG00000116691	cg00449251	MIIP	chr1	-4.86204	0.346915	3.16e-21	2.71e-20	338123	Positive	protein_coding
ENSG00000116754	cg23730181	SRSF11	chr1	-58.7481	4.32908	3.41e-21	2.92e-20	637626	Positive	protein_coding
ENSG00000132196	cg25336228	HSD17B7	chr1	-2.72283	0.207097	4.16e-21	3.52e-20	-530739	Negative	protein_coding
ENSG00000116171	cg26832062	SCP2	chr1	20.3042	1.47522	4.51e-21	3.8e-20	-910903	Positive	protein_coding
ENSG00000143442	cg05943971	POGZ	chr1	-32.5327	2.3652	4.77e-21	4.01e-20	388486	Negative	protein_coding
ENSG00000116521	cg11750116	SCAMP3	chr1	4.50788	0.345387	5.21e-21	4.36e-20	-171013	Negative	protein_coding
ENSG00000228594	cg17444015	FNDC10	chr1	3.53205	0.232274	5.63e-21	4.71e-20	793530	Positive	protein_coding
ENSG00000268043	cg20924778	NBPF12	chr1	-9.62117	0.747446	6.03e-21	5.03e-20	-602609	Negative	protein_coding
ENSG00000143748	cg26874473	NVL	chr1	4.20058	0.31874	7.33e-21	6.07e-20	929002	Positive	protein_coding
ENSG00000143761	cg04082353	ARF1	chr1	49.1373	3.685	9.22e-21	7.57e-20	353642	Positive	protein_coding
ENSG00000232499	cg19053839	RP11-512F24.1	chr1	0.701874	0.0478226	1.01e-20	8.26e-20	-309227	Negative	processed_pseudogene
ENSG00000177954	cg07429394	RPS27	chr1	95.1264	6.59315	1.06e-20	8.66e-20	44529	Positive	protein_coding
ENSG00000132881	cg27555392	RSG1	chr1	0.952248	0.0695775	1.39e-20	1.12e-19	120905	Negative	protein_coding
ENSG00000235098	cg23443459	ANKRD65	chr1	-2.66558	0.190615	1.49e-20	1.2e-19	156536	Negative	protein_coding
ENSG00000162722	cg07533148	TRIM58	chr1	-1.8309	0.126794	1.52e-20	1.22e-19	-323	Negative	protein_coding
ENSG00000160767	cg11750116	FAM189B	chr1	3.18418	0.227128	1.64e-20	1.31e-19	-162239	Positive	protein_coding
ENSG00000158864	cg21269709	NDUFS2	chr1	-17.9753	1.3629	1.75e-20	1.4e-19	151161	Negative	protein_coding
ENSG00000069424	cg25225169	KCNAB2	chr1	32.7073	2.35684	1.87e-20	1.49e-19	-1345	Positive	protein_coding
ENSG00000143106	cg17827850	PSMA5	chr1	8.99807	0.654517	1.87e-20	1.49e-19	1008721	Positive	protein_coding
ENSG00000168159	cg05926370	RNF187	chr1	36.4604	2.8125	1.88e-20	1.49e-19	273631	Positive	protein_coding
ENSG00000266338	cg18395499	NBPF15	chr1	-11.502	0.918022	1.93e-20	1.53e-19	-721526	Positive	protein_coding
ENSG00000269713	cg24620905	NBPF9	chr1	-13.1733	1.04845	2.27e-20	1.79e-19	882861	Negative	protein_coding
ENSG00000020129	cg18881764	NCDN	chr1	25.6099	1.95214	2.53e-20	1.99e-19	-853	Positive	protein_coding
ENSG00000179051	cg12447589	RCC2	chr1	7.96673	0.618577	2.57e-20	2.02e-19	32369	Negative	protein_coding
ENSG00000172456	cg21488113	FGGY	chr1	-2.19437	0.16599	3.14e-20	2.44e-19	780592	Negative	protein_coding
ENSG00000233290	cg04226724	RP11-147G16.1	chr1	16.9953	1.32781	3.28e-20	2.55e-19	-409449	Positive	lincRNA
ENSG00000265491	cg03844923	RNF115	chr1	-19.9476	1.61186	3.48e-20	2.69e-19	179760	Negative	protein_coding
ENSG00000126091	cg22023046	ST3GAL3	chr1	16.676	1.1848	3.55e-20	2.74e-19	-1070076	Positive	protein_coding
ENSG00000226067	cg15006561	LINC00623	chr1	1.32232	0.111693	3.81e-20	2.94e-19	736578	Negative	lincRNA
ENSG00000162885	cg20296524	B3GALNT2	chr1	-7.2058	0.575042	4.14e-20	3.18e-19	-968322	Negative	protein_coding
ENSG00000131791	cg20924778	PRKAB2	chr1	-12.0148	0.950591	4.2e-20	3.22e-19	386247	Negative	protein_coding
ENSG00000163041	cg26874473	H3F3A	chr1	47.5593	3.59213	4.35e-20	3.33e-19	905515	Positive	protein_coding
ENSG00000233461	cg27504802	RP11-295G20.2	chr1	0.416639	0.0304563	4.4e-20	3.37e-19	-357824	Positive	antisense
ENSG00000081870	cg26832062	HSPB11	chr1	3.52567	0.261492	5.57e-20	4.22e-19	-78395	Negative	protein_coding
ENSG00000272654	cg25741879	RP11-422P24.11	chr1	0.805184	0.0620249	6.25e-20	4.71e-19	194051	Negative	lincRNA
ENSG00000158006	cg10498813	PAFAH2	chr1	-5.271	0.391079	7.78e-20	5.83e-19	76499	Negative	protein_coding
ENSG00000116254	cg22650124	CHD5	chr1	-33.9983	2.48535	8.58e-20	6.41e-19	-233262	Positive	protein_coding
ENSG00000116661	cg00449251	FBXO2	chr1	-7.76552	0.571574	9.29e-20	6.9e-19	44325	Negative	protein_coding
ENSG00000268903	cg24678117	RP11-34P13.15	chr1	-6.27649	0.467139	9.88e-20	7.33e-19	925773	Negative	processed_pseudogene
ENSG00000134698	cg18881764	AGO4	chr1	-20.4192	1.62034	9.89e-20	7.33e-19	249690	Negative	protein_coding
ENSG00000132716	cg13109911	DCAF8	chr1	-38.4778	2.92217	1.02e-19	7.54e-19	-7295	Negative	protein_coding
ENSG00000272455	cg15042692	RP4-758J18.13	chr1	1.15332	0.0848769	1.24e-19	9.1e-19	101016	Positive	lincRNA
ENSG00000116652	cg15654686	DLEU2L	chr1	-2.00499	0.158914	1.85e-19	1.33e-18	23671	Negative	sense_intronic
ENSG00000116584	cg11750116	ARHGEF2	chr1	9.29535	0.661122	1.86e-19	1.33e-18	-861885	Positive	protein_coding
ENSG00000158161	cg06509993	EYA3	chr1	-7.56771	0.584238	1.86e-19	1.33e-18	-604540	Negative	protein_coding
ENSG00000162601	cg21488113	MYSM1	chr1	-17.3216	1.38366	2.01e-19	1.44e-18	-127394	Negative	protein_coding
ENSG00000074964	cg04803684	ARHGEF10L	chr1	-10.9258	0.816912	2.48e-19	1.76e-18	527646	Negative	protein_coding
ENSG00000235613	cg12655452	NSRP1P1	chr1	0.294204	0.0220088	2.54e-19	1.8e-18	627701	Negative	processed_pseudogene
ENSG00000143368	cg18487723	SF3B4	chr1	4.00466	0.307335	2.65e-19	1.87e-18	359425	Positive	protein_coding
ENSG00000171680	cg17079374	PLEKHG5	chr1	8.26291	0.595535	3.22e-19	2.26e-18	781860	Negative	protein_coding
ENSG00000264343	cg11344430	NOTCH2NL	chr1	8.1386	0.657804	3.43e-19	2.4e-18	-286951	Positive	protein_coding
ENSG00000259030	cg17589384	FPGT-TNNI3K	chr1	-3.75276	0.319638	3.49e-19	2.44e-18	-142	Negative	protein_coding
ENSG00000116191	cg12595163	RALGPS2	chr1	-50.8524	4.01721	3.52e-19	2.46e-18	-300552	Positive	protein_coding
ENSG00000121310	cg02626152	ECHDC2	chr1	-31.35	2.51436	4.55e-19	3.14e-18	-905102	Positive	protein_coding
ENSG00000097021	cg10327276	ACOT7	chr1	26.5301	2.04623	4.82e-19	3.31e-18	437787	Positive	protein_coding
ENSG00000143622	cg11750116	RIT1	chr1	-5.52307	0.410404	4.91e-19	3.37e-18	-812842	Positive	protein_coding
ENSG00000162576	cg05753589	MXRA8	chr1	6.47753	0.439495	5.21e-19	3.57e-18	780637	Positive	protein_coding
ENSG00000076864	cg11987090	RAP1GAP	chr1	-91.9089	7.01444	5.9e-19	4.02e-18	855734	Negative	protein_coding
ENSG00000117543	cg05432061	DPH5	chr1	-1.9822	0.158792	6e-19	4.08e-18	-856010	Negative	protein_coding
ENSG00000067704	cg15356516	IARS2	chr1	-16.0099	1.25554	6.39e-19	4.33e-18	-786039	Positive	protein_coding
ENSG00000077157	cg16927778	PPP1R12B	chr1	17.6999	1.36608	7.79e-19	5.24e-18	-640163	Positive	protein_coding
ENSG00000177868	cg11953541	SVBP	chr1	-2.24643	0.175238	8.63e-19	5.79e-18	-472494	Negative	protein_coding
ENSG00000168275	cg06812651	COA6	chr1	-1.99736	0.160826	8.99e-19	6.02e-18	-236897	Negative	protein_coding
ENSG00000197312	cg15290708	DDI2	chr1	22.3333	1.75383	1.15e-18	7.62e-18	207744	Positive	protein_coding
ENSG00000162383	cg26832062	SLC1A7	chr1	-61.2657	5.085	1.32e-18	8.7e-18	751000	Positive	protein_coding
ENSG00000159423	cg00065215	ALDH4A1	chr1	9.73137	0.765401	1.42e-18	9.33e-18	-238656	Positive	protein_coding
ENSG00000064703	cg10174611	DDX20	chr1	-5.23059	0.4164	1.43e-18	9.38e-18	989012	Positive	protein_coding
ENSG00000162923	cg26874473	WDR26	chr1	28.3751	2.3267	1.49e-18	9.77e-18	771193	Positive	protein_coding
ENSG00000281571	cg11344430	AC241585.1	chr1	-0.627461	0.0503947	1.6e-18	1.05e-17	-644401	Negative	protein_coding
ENSG00000243659	cg27335571	RP11-4K3__A.3	chr1	-0.375534	0.0277804	2.7e-18	1.73e-17	-31832	Positive	processed_pseudogene
ENSG00000169914	cg05051464	OTUD3	chr1	-9.21986	0.72966	2.71e-18	1.74e-17	397567	Negative	protein_coding
ENSG00000153904	cg18635645	DDAH1	chr1	46.0038	3.78238	2.93e-18	1.87e-17	-116373	Positive	protein_coding
ENSG00000160072	cg15323084	ATAD3B	chr1	11.913	0.918704	2.96e-18	1.89e-17	-149558	Positive	protein_coding
ENSG00000077585	cg14550672	GPR137B	chr1	52.3099	4.37067	3.54e-18	2.24e-17	-252795	Positive	protein_coding
ENSG00000162408	cg07617633	NOL9	chr1	5.23834	0.390303	3.55e-18	2.24e-17	232118	Positive	protein_coding
ENSG00000175137	cg14360852	SH3BP5L	chr1	5.27026	0.440324	3.67e-18	2.31e-17	95788	Positive	protein_coding
ENSG00000077254	cg12655452	USP33	chr1	-20.0352	1.66122	4.03e-18	2.53e-17	-476578	Negative	protein_coding
ENSG00000122481	cg20238525	RWDD3	chr1	3.81802	0.317852	4.4e-18	2.75e-17	526716	Positive	protein_coding
ENSG00000171824	cg19178679	EXOSC10	chr1	-18.9152	1.5209	4.45e-18	2.77e-17	-273267	Negative	protein_coding
ENSG00000162415	cg05978555	ZSWIM5	chr1	10.7039	0.88513	6.78e-18	4.18e-17	1158681	Negative	protein_coding
ENSG00000168653	cg10024100	NDUFS5	chr1	16.5471	1.34558	7.86e-18	4.81e-17	-858062	Positive	protein_coding
ENSG00000135845	cg14376275	PIGC	chr1	-3.30075	0.283619	8.36e-18	5.11e-17	-528759	Negative	protein_coding
ENSG00000187730	cg23537515	GABRD	chr1	-3.92097	0.294301	8.48e-18	5.17e-17	597788	Negative	protein_coding
ENSG00000143740	cg00355633	SNAP47	chr1	5.12215	0.422419	9.6e-18	5.83e-17	-7698	Positive	protein_coding
ENSG00000054116	cg14333068	TRAPPC3	chr1	-3.93678	0.315623	9.67e-18	5.87e-17	567406	Negative	protein_coding
ENSG00000143669	cg14550672	LYST	chr1	119.353	9.81037	1.44e-17	8.56e-17	734259	Negative	protein_coding
ENSG00000196071	cg09506600	OR2L13	chr1	-1.54128	0.128511	1.51e-17	8.95e-17	158258	Negative	protein_coding
ENSG00000184260	cg01464052	HIST2H2AC	chr1	0.368342	0.0239547	1.59e-17	9.4e-17	-395752	Negative	protein_coding
ENSG00000275131	cg21732948	CH17-472G23.4	chr1	51.7015	4.40095	1.66e-17	9.81e-17	-841940	Negative	transcribed_unprocessed_pseudogene
ENSG00000134255	cg17827850	CEPT1	chr1	11.3281	0.934415	1.83e-17	1.08e-16	731864	Negative	protein_coding
ENSG00000272031	cg16801686	ANKRD34A	chr1	3.62537	0.296719	1.84e-17	1.08e-16	-40799	Positive	protein_coding
ENSG00000177628	cg09413064	GBA	chr1	-22.6327	1.87875	1.89e-17	1.11e-16	-675506	Negative	protein_coding
ENSG00000135837	cg12595163	CEP350	chr1	-25.4205	2.16542	2.1e-17	1.23e-16	929074	Positive	protein_coding
ENSG00000160679	cg27475685	CHTOP	chr1	-15.0699	1.20883	2.19e-17	1.28e-16	-324318	Positive	protein_coding
ENSG00000169962	cg15323084	TAS1R3	chr1	0.745949	0.0504053	2.58e-17	1.49e-16	-290047	Positive	protein_coding
ENSG00000091483	cg17788938	FH	chr1	-13.5647	1.18642	2.79e-17	1.61e-16	22326	Positive	protein_coding
ENSG00000182004	cg23214606	SNRPE	chr1	4.85638	0.413709	3.11e-17	1.78e-16	854276	Positive	protein_coding
ENSG00000186501	cg17798192	TMEM222	chr1	-15.491	1.30125	3.15e-17	1.8e-16	-168134	Positive	protein_coding
ENSG00000133069	cg09085216	TMCC2	chr1	18.5831	1.53528	3.28e-17	1.87e-16	867993	Negative	protein_coding
ENSG00000183114	cg11904887	FAM43B	chr1	-0.778461	0.0661114	3.65e-17	2.07e-16	44264	Negative	protein_coding
ENSG00000159450	cg12714538	TCHH	chr1	0.790453	0.0596591	3.76e-17	2.13e-16	-706646	Positive	protein_coding
ENSG00000196182	cg15387272	STK40	chr1	-7.93828	0.652112	4.16e-17	2.35e-16	58284	Negative	protein_coding
ENSG00000133216	cg14888607	EPHB2	chr1	-13.0416	1.03812	5.06e-17	2.84e-16	796951	Negative	protein_coding
ENSG00000123472	cg24325883	ATPAF1	chr1	-10.0446	0.843038	6.65e-17	3.68e-16	-385108	Positive	protein_coding
ENSG00000116906	cg24073755	GNPAT	chr1	5.06681	0.415444	7.26e-17	4.01e-16	-578480	Positive	protein_coding
ENSG00000229444	cg24483304	RP11-184I16.4	chr1	-2.67133	0.232669	7.71e-17	4.25e-16	-319941	Negative	antisense
ENSG00000223745	cg08861044	CCDC18-AS1	chr1	-8.43208	0.703155	9.89e-17	5.4e-16	799392	Negative	processed_transcript
ENSG00000143437	cg16104481	ARNT	chr1	-30.9928	2.59621	1.08e-16	5.88e-16	-179989	Negative	protein_coding
ENSG00000225972	cg15323084	MTND1P23	chr1	8.2654	0.53596	1.12e-16	6.08e-16	-992265	Negative	unprocessed_pseudogene
ENSG00000237950	cg24146080	RP11-7O11.3	chr1	2.89053	0.210297	1.13e-16	6.13e-16	569887	Positive	antisense
ENSG00000162946	cg17142856	DISC1	chr1	43.9041	3.7016	1.17e-16	6.33e-16	204644	Positive	protein_coding
ENSG00000116128	cg21813591	BCL9	chr1	6.62952	0.594247	1.21e-16	6.54e-16	-58244	Positive	protein_coding
ENSG00000152382	cg20540042	TADA1	chr1	-9.54605	0.826284	1.34e-16	7.2e-16	364245	Negative	protein_coding
ENSG00000225630	cg15323084	MTND2P28	chr1	747.574	55.0587	1.43e-16	7.67e-16	-991687	Positive	unprocessed_pseudogene
ENSG00000187634	cg12655137	SAMD11	chr1	-40.3441	2.91161	1.58e-16	8.44e-16	-754021	Positive	protein_coding
ENSG00000119285	cg00419040	HEATR1	chr1	9.28875	0.816516	1.72e-16	9.16e-16	-266919	Positive	protein_coding
ENSG00000163485	cg15027815	ADORA1	chr1	-12.3499	0.988645	1.73e-16	9.21e-16	928598	Negative	protein_coding
ENSG00000180098	cg16996661	TRNAU1AP	chr1	-2.69844	0.23159	2.85e-16	1.48e-15	-628263	Negative	protein_coding
ENSG00000224870	cg12655137	RP4-758J18.2	chr1	-2.53957	0.212404	2.92e-16	1.52e-15	-278429	Negative	processed_transcript
ENSG00000143553	cg19293769	SNAPIN	chr1	3.78317	0.338696	3.49e-16	1.8e-15	-668696	Negative	protein_coding
ENSG00000182134	cg22682031	TDRKH	chr1	5.27396	0.453611	3.76e-16	1.94e-15	-157573	Positive	protein_coding
ENSG00000278249	cg12014643	SCARNA2	chr1	0.467521	0.0350697	3.98e-16	2.04e-15	-212239	Positive	scaRNA
ENSG00000162706	cg04122068	CADM3	chr1	45.855	4.08672	4.51e-16	2.3e-15	-927105	Positive	protein_coding
ENSG00000277007	cg05367960	RP11-392O17.2	chr1	-0.351863	0.0325137	5.13e-16	2.61e-15	-1001090	Negative	lincRNA
ENSG00000143379	cg16909824	SETDB1	chr1	-5.22071	0.438402	5.78e-16	2.92e-15	-400699	Negative	protein_coding
ENSG00000130762	cg24432048	ARHGEF16	chr1	4.47064	0.384618	7.19e-16	3.61e-15	-456422	Negative	protein_coding
ENSG00000004455	cg13279856	AK2	chr1	29.2929	2.46005	1.03e-15	5.09e-15	-356761	Positive	protein_coding
ENSG00000116151	cg12443001	MORN1	chr1	-4.82103	0.421702	1.09e-15	5.38e-15	214589	Positive	protein_coding
ENSG00000171806	cg02837999	METTL18	chr1	-1.53657	0.140288	1.16e-15	5.72e-15	-423486	Negative	protein_coding
ENSG00000254154	cg25631060	RP4-798P15.3	chr1	-5.66289	0.479278	1.32e-15	6.46e-15	-763965	Positive	processed_transcript
ENSG00000277406	cg12769891	CH17-385C13.2	chr1	3.77064	0.277078	1.42e-15	6.93e-15	-324363	Positive	unprocessed_pseudogene
ENSG00000116459	cg10174611	ATP5F1	chr1	-11.9558	1.08959	1.51e-15	7.35e-15	682631	Negative	protein_coding
ENSG00000243960	cg01650919	RP11-552M11.4	chr1	-1.05419	0.0962884	1.56e-15	7.58e-15	551842	Negative	sense_overlapping
ENSG00000168710	cg01416227	AHCYL1	chr1	-32.7596	3.0138	1.57e-15	7.62e-15	500602	Negative	protein_coding
ENSG00000126107	cg10224098	HECTD3	chr1	5.54915	0.49297	1.59e-15	7.71e-15	-594983	Positive	protein_coding
ENSG00000204624	cg01615673	DISP3	chr1	-18.0824	1.66195	1.64e-15	7.94e-15	-47651	Negative	protein_coding
ENSG00000159592	cg20318713	GPBP1L1	chr1	-12.1198	1.10235	1.71e-15	8.27e-15	-287252	Positive	protein_coding
ENSG00000122435	cg12469756	TRMT13	chr1	-8.14471	0.735286	1.78e-15	8.59e-15	282258	Negative	protein_coding
ENSG00000227671	cg20478514	RP11-488L18.4	chr1	3.07338	0.267827	2.13e-15	1.02e-14	-465689	Negative	transcribed_unprocessed_pseudogene
ENSG00000065243	cg21497833	PKN2	chr1	-13.1957	1.19638	2.18e-15	1.04e-14	-799229	Positive	protein_coding
ENSG00000184677	cg06974961	ZBTB40	chr1	15.3691	1.42113	2.18e-15	1.04e-14	-788474	Positive	protein_coding
ENSG00000116525	cg17716617	TRIM62	chr1	-2.18979	0.179634	2.74e-15	1.3e-14	-391420	Positive	protein_coding
ENSG00000132763	cg00765921	MMACHC	chr1	1.6943	0.149711	3e-15	1.42e-14	-188305	Positive	protein_coding
ENSG00000188529	cg19270505	SRSF10	chr1	-28.2813	2.51232	3.33e-15	1.57e-14	965410	Positive	protein_coding
ENSG00000130766	cg26793905	SESN2	chr1	3.26378	0.272403	3.87e-15	1.81e-14	-388780	Positive	protein_coding
ENSG00000090273	cg10400390	NUDC	chr1	-17.831	1.59562	4.03e-15	1.88e-14	-627048	Negative	protein_coding
ENSG00000132485	cg12312700	ZRANB2	chr1	-38.8623	3.71121	4.24e-15	1.97e-14	18131	Positive	protein_coding
ENSG00000070785	cg19286674	EIF2B3	chr1	6.88077	0.644632	4.47e-15	2.07e-14	136224	Positive	protein_coding
ENSG00000248527	cg15323084	MTATP6P1	chr1	2499.54	175.56	5.54e-15	2.55e-14	-987631	Positive	unprocessed_pseudogene
ENSG00000213057	cg07881152	C1orf220	chr1	-2.84648	0.255905	5.63e-15	2.58e-14	153708	Negative	lincRNA
ENSG00000004487	cg26628511	KDM1A	chr1	9.63018	0.857116	5.67e-15	2.6e-14	57	Positive	protein_coding
ENSG00000134262	cg25190176	AP4B1	chr1	-9.43637	0.903749	5.79e-15	2.65e-14	863878	Negative	protein_coding
ENSG00000143575	cg04498032	HAX1	chr1	-8.50232	0.702685	6.81e-15	3.1e-14	-1000524	Negative	protein_coding
ENSG00000152332	cg13233534	UHMK1	chr1	23.3527	2.16541	8.2e-15	3.71e-14	-64382	Positive	protein_coding
ENSG00000231365	cg19537820	RP11-418J17.1	chr1	1.1087	0.0995372	8.43e-15	3.81e-14	-668798	Positive	antisense
ENSG00000203663	cg17518550	OR2L2	chr1	-1.49489	0.134955	8.57e-15	3.87e-14	480989	Negative	protein_coding
ENSG00000264522	cg13476072	OTUD7B	chr1	12.4452	1.07756	9.09e-15	4.09e-14	-1392	Positive	protein_coding
ENSG00000160753	cg11750116	RUSC1	chr1	7.43019	0.638853	9.23e-15	4.15e-14	235928	Positive	protein_coding
ENSG00000162694	cg23379653	EXTL2	chr1	-5.00479	0.464046	1.05e-14	4.69e-14	-3488	Positive	protein_coding
ENSG00000136636	cg19646445	KCTD3	chr1	54.9679	5.36753	1.14e-14	5.08e-14	-50	Negative	protein_coding
ENSG00000171960	cg07532155	PPIH	chr1	-1.83634	0.166474	1.17e-14	5.21e-14	-872344	Negative	protein_coding
ENSG00000283259	cg03395993	ABC14-1188822O7.1	chr1	-1.66647	0.138741	1.22e-14	5.43e-14	595119	Negative	antisense
ENSG00000143653	cg09559572	SCCPDH	chr1	10.976	0.996827	1.37e-14	6.07e-14	-207742	Positive	protein_coding
ENSG00000143499	cg19090360	SMYD2	chr1	-11.6687	1.11663	1.51e-14	6.66e-14	253431	Negative	protein_coding
ENSG00000159377	cg05272772	PSMB4	chr1	-11.058	1.0431	1.53e-14	6.74e-14	702325	Positive	protein_coding
ENSG00000163131	cg22682031	CTSS	chr1	4.09029	0.383175	1.55e-14	6.83e-14	882346	Positive	protein_coding
ENSG00000228327	cg07010566	RP11-206L10.2	chr1	-28.7538	2.58043	1.62e-14	7.13e-14	702362	Negative	transcribed_unprocessed_pseudogene
ENSG00000117586	cg03584783	TNFSF4	chr1	-0.930411	0.0888073	2.23e-14	9.66e-14	683934	Negative	protein_coding
ENSG00000163879	cg25488697	DNALI1	chr1	-11.728	1.10767	2.3e-14	9.95e-14	-487792	Negative	protein_coding
ENSG00000270171	cg25763306	RP11-338N10.1	chr1	-3.61837	0.332374	2.38e-14	1.03e-13	-11968	Negative	lincRNA
ENSG00000188092	cg20924778	GPR89B	chr1	-2.87207	0.261015	2.41e-14	1.04e-13	387040	Positive	protein_coding
ENSG00000134247	cg24833425	PTGFRN	chr1	7.15575	0.664081	2.62e-14	1.13e-13	-149952	Positive	protein_coding
ENSG00000053372	cg00925509	MRTO4	chr1	2.78011	0.264072	2.74e-14	1.18e-13	-229357	Positive	protein_coding
ENSG00000143624	cg26036199	INTS3	chr1	-41.8232	3.98305	2.92e-14	1.25e-13	-239730	Negative	protein_coding
ENSG00000134709	cg17252666	HOOK1	chr1	-59.722	5.67079	2.97e-14	1.27e-13	-938851	Negative	protein_coding
ENSG00000143156	cg20675235	NME7	chr1	-4.67426	0.453909	3.21e-14	1.37e-13	-789496	Negative	protein_coding
ENSG00000143033	cg19827167	MTF2	chr1	7.9216	0.750901	3.33e-14	1.42e-13	-767415	Positive	protein_coding
ENSG00000162591	cg19359929	MEGF6	chr1	-16.3845	1.32074	4.36e-14	1.83e-13	137248	Negative	protein_coding
ENSG00000142694	cg18881764	EVA1B	chr1	0.475599	0.0362333	4.52e-14	1.9e-13	-763705	Positive	protein_coding
ENSG00000116729	cg05450267	WLS	chr1	-59.508	5.76415	5.03e-14	2.11e-13	134210	Positive	protein_coding
ENSG00000215717	cg04922908	TMEM167B	chr1	-24.6768	2.32326	5.03e-14	2.11e-13	-393911	Negative	protein_coding
ENSG00000173436	cg04338778	MINOS1	chr1	-3.68518	0.348156	5.12e-14	2.14e-13	845122	Positive	protein_coding
ENSG00000131779	cg07011115	PEX11B	chr1	-2.96046	0.296482	5.2e-14	2.18e-13	-25355	Negative	protein_coding
ENSG00000116641	cg18124616	DOCK7	chr1	14.6171	1.39039	5.52e-14	2.3e-13	-17282	Positive	protein_coding
ENSG00000203709	cg05652609	C1orf132	chr1	-26.716	2.48132	5.87e-14	2.44e-13	22468	Positive	lincRNA
ENSG00000117408	cg13864586	IPO13	chr1	34.7514	3.33768	5.89e-14	2.45e-13	-685340	Negative	protein_coding
ENSG00000227811	cg06079481	FAM212B-AS1	chr1	2.08937	0.20419	6.11e-14	2.53e-13	-62	Positive	antisense
ENSG00000162910	cg04082353	MRPL55	chr1	2.91466	0.278704	6.4e-14	2.65e-13	-377661	Positive	protein_coding
ENSG00000197056	cg18881764	ZMYM1	chr1	-3.07641	0.296926	6.56e-14	2.71e-13	-526154	Positive	protein_coding
ENSG00000271576	cg03980824	RP11-486G15.2	chr1	-2.77038	0.265183	6.73e-14	2.78e-13	-76610	Negative	lincRNA
ENSG00000182118	cg09708595	FAM89A	chr1	-4.50705	0.439242	6.91e-14	2.85e-13	-101000	Negative	protein_coding
ENSG00000070759	cg23018400	TESK2	chr1	-1.05665	0.103725	6.99e-14	2.88e-13	903277	Negative	protein_coding
ENSG00000155816	cg19356905	FMN2	chr1	6.92059	0.682997	7.4e-14	3.04e-13	-597753	Negative	protein_coding
ENSG00000123836	cg19452316	PFKFB2	chr1	118.562	11.5922	8.62e-14	3.52e-13	526733	Positive	protein_coding
ENSG00000164010	cg07532155	ERMAP	chr1	-3.19077	0.304593	9.15e-14	3.72e-13	-713645	Negative	protein_coding
ENSG00000203812	cg26352401	HIST2H2AA3	chr1	4.64102	0.364389	9.63e-14	3.91e-13	225915	Positive	protein_coding
ENSG00000142910	cg10773309	TINAGL1	chr1	0.873424	0.0760979	9.87e-14	4e-13	-187325	Negative	protein_coding
ENSG00000135828	cg00837947	RNASEL	chr1	-6.64885	0.619479	1.07e-13	4.32e-13	15779	Negative	protein_coding
ENSG00000158109	cg11946666	TPRG1L	chr1	-20.9095	1.78238	1.08e-13	4.36e-13	293984	Negative	protein_coding
ENSG00000042781	cg10592245	USH2A	chr1	136.33	13.8848	1.15e-13	4.63e-13	-539783	Positive	protein_coding
ENSG00000117000	cg23710710	RLF	chr1	-25.6886	2.3694	1.24e-13	4.97e-13	-96543	Negative	protein_coding
ENSG00000036549	cg00576259	ZZZ3	chr1	14.4871	1.45319	1.37e-13	5.48e-13	197244	Negative	protein_coding
ENSG00000164008	cg02508525	C1orf50	chr1	1.57286	0.151425	1.41e-13	5.63e-13	-996474	Positive	protein_coding
ENSG00000188783	cg21421634	PRELP	chr1	137.186	11.632	1.46e-13	5.83e-13	-804743	Negative	protein_coding
ENSG00000162814	cg12668928	SPATA17	chr1	-1.00518	0.100855	1.5e-13	5.98e-13	-540151	Positive	protein_coding
ENSG00000162669	cg12456433	HFM1	chr1	-4.0432	0.389022	1.59e-13	6.33e-13	143292	Negative	protein_coding
ENSG00000198830	cg11383397	HMGN2	chr1	83.8843	7.93335	1.77e-13	7.02e-13	612818	Negative	protein_coding
ENSG00000163346	cg09413064	PBXIP1	chr1	-181.807	14.8826	1.81e-13	7.17e-13	-385130	Negative	protein_coding
ENSG00000120370	cg25353026	GORAB	chr1	-4.08438	0.425101	1.83e-13	7.25e-13	637754	Positive	protein_coding
ENSG00000117713	cg11383397	ARID1A	chr1	-31.9725	3.0239	2.18e-13	8.59e-13	833614	Negative	protein_coding
ENSG00000048707	cg08202444	VPS13D	chr1	53.528	5.16375	2.33e-13	9.15e-13	575276	Positive	protein_coding
ENSG00000235131	cg05116756	RP5-1092A11.2	chr1	-1.76504	0.167811	2.78e-13	1.09e-12	-22062	Negative	antisense
ENSG00000196505	cg05400613	GDAP2	chr1	7.33857	0.726887	2.86e-13	1.12e-12	65474	Positive	protein_coding
ENSG00000143772	cg23096144	ITPKB	chr1	-3.85751	0.367149	2.94e-13	1.14e-12	-806437	Negative	protein_coding
ENSG00000116580	cg23679769	GON4L	chr1	-13.9562	1.39539	3.62e-13	1.4e-12	822563	Negative	protein_coding
ENSG00000116209	cg26832062	TMEM59	chr1	32.4405	3.18297	3.67e-13	1.41e-12	-188502	Positive	protein_coding
ENSG00000043514	cg11016786	TRIT1	chr1	-7.50627	0.709572	3.75e-13	1.44e-12	-296149	Negative	protein_coding
ENSG00000086619	cg14550672	ERO1B	chr1	10.2261	0.984819	3.94e-13	1.51e-12	179745	Negative	protein_coding
ENSG00000097033	cg09799432	SH3GLB1	chr1	-36.041	3.68173	5.23e-13	1.99e-12	126	Negative	protein_coding
ENSG00000157181	cg22265501	C1orf27	chr1	-6.10638	0.601885	5.32e-13	2.02e-12	-610200	Negative	protein_coding
ENSG00000135823	cg22401267	STX6	chr1	5.71986	0.57212	5.45e-13	2.07e-12	-431795	Positive	protein_coding
ENSG00000174307	cg05923618	PHLDA3	chr1	6.06223	0.547406	5.89e-13	2.22e-12	-440609	Positive	protein_coding
ENSG00000059588	cg11628564	TARBP1	chr1	-24.3797	2.33153	5.97e-13	2.25e-12	346827	Negative	protein_coding
ENSG00000134183	cg09152047	GNAT2	chr1	18.8204	1.87209	6.07e-13	2.29e-12	136946	Positive	protein_coding
ENSG00000136643	cg22489498	RPS6KC1	chr1	-4.78386	0.469645	6.34e-13	2.39e-12	-938135	Positive	protein_coding
ENSG00000174842	cg20609057	GLMN	chr1	22.0867	2.31359	6.44e-13	2.42e-12	934186	Positive	protein_coding
ENSG00000263956	cg11497794	NBPF11	chr1	-4.34933	0.459745	6.6e-13	2.48e-12	-560819	Positive	protein_coding
ENSG00000228238	cg22265501	GS1-304P7.2	chr1	-0.336471	0.0349296	6.69e-13	2.51e-12	-407759	Negative	processed_pseudogene
ENSG00000280222	cg04094653	RP11-174G17.3	chr1	0.480574	0.0432246	7.05e-13	2.64e-12	-537320	Positive	TEC
ENSG00000142676	cg18921123	RPL11	chr1	-54.2859	5.38535	7.71e-13	2.88e-12	-288748	Negative	protein_coding
ENSG00000116668	cg00816620	SWT1	chr1	-2.53905	0.241538	7.78e-13	2.91e-12	-1289	Negative	protein_coding
ENSG00000137941	cg26188784	TTLL7	chr1	-22.7145	2.30135	7.82e-13	2.92e-12	709260	Negative	protein_coding
ENSG00000271601	cg14782735	LIX1L	chr1	9.96363	0.912739	8.31e-13	3.09e-12	-108933	Positive	protein_coding
ENSG00000143387	cg11594892	CTSK	chr1	-7.16953	0.655921	8.58e-13	3.19e-12	80648	Negative	protein_coding
ENSG00000183291	cg24402755	SELENOF	chr1	-33.5969	3.56215	8.63e-13	3.21e-12	52072	Positive	protein_coding
ENSG00000268575	cg21568910	RP1-283E3.8	chr1	-5.58497	0.52766	9.54e-13	3.53e-12	629881	Negative	processed_transcript
ENSG00000223396	cg15622697	RP11-134G8.5	chr1	0.515164	0.0509386	9.66e-13	3.57e-12	-437002	Negative	lincRNA
ENSG00000117748	cg06027600	RPA2	chr1	8.88865	0.830303	1.05e-12	3.87e-12	-9221	Positive	protein_coding
ENSG00000163444	cg13134514	TMEM183A	chr1	-10.111	1.04885	1.11e-12	4.09e-12	196488	Negative	protein_coding
ENSG00000204859	cg05895952	ZBTB48	chr1	-5.55509	0.563802	1.14e-12	4.2e-12	380361	Negative	protein_coding
ENSG00000143479	cg12430618	DYRK3	chr1	2.75921	0.270865	1.17e-12	4.3e-12	-277085	Positive	protein_coding
ENSG00000237975	cg00888758	FLG-AS1	chr1	2.28672	0.211657	1.17e-12	4.3e-12	-56073	Positive	antisense
ENSG00000135838	cg07874330	NPL	chr1	-2.50802	0.253257	1.19e-12	4.37e-12	178513	Negative	protein_coding
ENSG00000121644	cg06992877	DESI2	chr1	-8.36108	0.865966	1.21e-12	4.44e-12	-317091	Negative	protein_coding
ENSG00000163159	cg22682031	VPS72	chr1	-5.2968	0.521283	1.24e-12	4.54e-12	442547	Negative	protein_coding
ENSG00000162728	cg04122068	KCNJ9	chr1	5.53428	0.556413	1.25e-12	4.58e-12	-17176	Positive	protein_coding
ENSG00000221953	cg25307556	C1orf229	chr1	-0.772806	0.0822641	1.28e-12	4.68e-12	-544003	Negative	lincRNA
ENSG00000133226	cg09993145	SRRM1	chr1	41.0631	4.29459	1.3e-12	4.75e-12	-333698	Positive	protein_coding
ENSG00000181218	cg07022056	HIST3H2A	chr1	2.51475	0.25248	1.31e-12	4.78e-12	6326	Positive	protein_coding
ENSG00000117298	cg11904887	ECE1	chr1	-42.2612	4.04131	1.33e-12	4.85e-12	-708938	Negative	protein_coding
ENSG00000175130	cg16697620	MARCKSL1	chr1	-30.7613	2.7558	1.39e-12	5.06e-12	-707244	Negative	protein_coding
ENSG00000162430	cg20385686	SEPN1	chr1	44.9618	3.83767	1.42e-12	5.16e-12	-897784	Positive	protein_coding
ENSG00000198890	cg06947721	PRMT6	chr1	1.82618	0.19177	1.53e-12	5.55e-12	92072	Positive	protein_coding
ENSG00000156875	cg03587651	MFSD14A	chr1	-5.58945	0.581188	1.54e-12	5.58e-12	857628	Negative	protein_coding
ENSG00000117139	cg15622697	KDM5B	chr1	-88.3135	9.07179	1.59e-12	5.75e-12	-768790	Positive	protein_coding
ENSG00000081721	cg01481784	DUSP12	chr1	5.4841	0.543711	1.67e-12	6.03e-12	349823	Negative	protein_coding
ENSG00000162836	cg17697306	ACP6	chr1	-2.20718	0.226679	1.7e-12	6.13e-12	-134548	Positive	protein_coding
ENSG00000162817	cg10966083	C1orf115	chr1	18.83	1.89592	1.73e-12	6.23e-12	161888	Positive	protein_coding
ENSG00000233482	cg26829310	RP11-78O9.1	chr1	-0.933687	0.0953412	1.75e-12	6.3e-12	265623	Negative	antisense
ENSG00000122477	cg12469756	LRRC39	chr1	-24.2157	2.54386	1.83e-12	6.58e-12	-297557	Positive	protein_coding
ENSG00000186094	cg23226852	AGBL4	chr1	2.38181	0.249857	1.85e-12	6.65e-12	2427126	Positive	protein_coding
ENSG00000132692	cg15109730	BCAN	chr1	-19.5525	1.8198	2.15e-12	7.68e-12	-87010	Positive	protein_coding
ENSG00000198715	cg11572390	GLMP	chr1	2.45556	0.239094	2.24e-12	7.98e-12	-6943	Negative	protein_coding
ENSG00000076321	cg21384371	KLHL20	chr1	-2.7966	0.303856	2.36e-12	8.39e-12	-109451	Negative	protein_coding
ENSG00000075151	cg03177642	EIF4G3	chr1	25.3194	2.58863	2.42e-12	8.59e-12	546185	Positive	protein_coding
ENSG00000272449	cg04882365	RP3-395M20.12	chr1	-1.89585	0.130649	2.8e-12	9.89e-12	-787558	Negative	lincRNA
ENSG00000242125	cg22468983	SNHG3	chr1	-5.71499	0.602319	2.82e-12	9.95e-12	136435	Negative	sense_intronic
ENSG00000173947	cg01011619	PIFO	chr1	-9.2309	0.891907	2.83e-12	9.99e-12	382590	Positive	protein_coding
ENSG00000137942	cg12720424	FNBP1L	chr1	19.585	1.96453	3.05e-12	1.07e-11	-799542	Positive	protein_coding
ENSG00000163393	cg25158649	SLC22A15	chr1	-5.01683	0.533745	3.09e-12	1.09e-11	262101	Negative	protein_coding
ENSG00000143252	cg02620307	SDHC	chr1	-13.9639	1.40624	3.2e-12	1.12e-11	82	Negative	protein_coding
ENSG00000078618	cg06141883	NRDC	chr1	29.9047	2.97991	3.23e-12	1.13e-11	267025	Negative	protein_coding
ENSG00000180869	cg26342398	LINC01555	chr1	-0.431494	0.0431771	3.24e-12	1.14e-11	62413	Negative	lincRNA
ENSG00000142599	cg10009930	RERE	chr1	-48.0302	4.79034	3.39e-12	1.19e-11	1186947	Positive	protein_coding
ENSG00000137962	cg17858364	ARHGAP29	chr1	-78.5569	7.92773	3.44e-12	1.2e-11	-802975	Negative	protein_coding
ENSG00000134376	cg13682187	CRB1	chr1	-71.1588	7.73923	3.46e-12	1.21e-11	290822	Negative	protein_coding
ENSG00000180667	cg16192320	YOD1	chr1	-16.6242	1.70912	3.53e-12	1.23e-11	-536434	Positive	protein_coding
ENSG00000143815	cg26874473	LBR	chr1	3.42343	0.358773	3.65e-12	1.27e-11	-245166	Positive	protein_coding
ENSG00000170075	cg15027815	GPR37L1	chr1	-21.3934	1.78886	3.85e-12	1.34e-11	-39139	Negative	protein_coding
ENSG00000041988	cg17079374	THAP3	chr1	2.01373	0.207451	3.95e-12	1.37e-11	-623086	Positive	protein_coding
ENSG00000186141	cg16801686	POLR3C	chr1	1.86359	0.202081	4.05e-12	1.41e-11	-94554	Positive	protein_coding
ENSG00000181450	cg05926370	ZNF678	chr1	-6.59739	0.665067	4.35e-12	1.51e-11	-650208	Positive	protein_coding
ENSG00000273382	cg01938118	RP5-1065J22.8	chr1	0.762906	0.073187	4.44e-12	1.53e-11	-341494	Positive	antisense
ENSG00000116984	cg20863821	MTR	chr1	14.2205	1.52168	5.15e-12	1.77e-11	851383	Negative	protein_coding
ENSG00000213088	cg04122068	ACKR1	chr1	8.01963	0.799057	6.59e-12	2.25e-11	-895407	Positive	protein_coding
ENSG00000007341	cg27077219	ST7L	chr1	4.0069	0.408001	6.68e-12	2.28e-11	326444	Negative	protein_coding
ENSG00000065600	cg07862094	TMEM206	chr1	-1.70494	0.177173	6.7e-12	2.28e-11	203411	Negative	protein_coding
ENSG00000049089	cg03544335	COL9A2	chr1	85.868	6.96181	7.02e-12	2.39e-11	368640	Negative	protein_coding
ENSG00000135775	cg07011025	COG2	chr1	-3.96988	0.420193	7.16e-12	2.43e-11	-336211	Negative	protein_coding
ENSG00000170382	cg21421634	LRRN2	chr1	10.618	1.00916	7.31e-12	2.48e-11	-336621	Positive	protein_coding
ENSG00000142949	cg13233799	PTPRF	chr1	124.07	12.6762	7.52e-12	2.55e-11	-5887	Positive	protein_coding
ENSG00000179403	cg05753589	VWA1	chr1	11.844	0.9708	8.58e-12	2.9e-11	-698465	Negative	protein_coding
ENSG00000158966	cg21716820	CACHD1	chr1	6.62259	0.697816	8.86e-12	2.99e-11	777983	Positive	protein_coding
ENSG00000143373	cg00438783	ZNF687	chr1	-12.2772	1.25604	9.11e-12	3.07e-11	765867	Negative	protein_coding
ENSG00000280157	cg11520395	RP11-520H14.7	chr1	0.865556	0.0929727	9.15e-12	3.08e-11	385109	Positive	TEC
ENSG00000121957	cg19404896	GPSM2	chr1	6.54432	0.701364	9.19e-12	3.09e-11	-551106	Positive	protein_coding
ENSG00000090621	cg16490096	PABPC4	chr1	35.9521	3.70822	9.44e-12	3.18e-11	341173	Positive	protein_coding
ENSG00000160049	cg08108188	DFFA	chr1	16.1223	1.64046	1.07e-11	3.59e-11	337339	Positive	protein_coding
ENSG00000227733	cg08682063	RP4-565E6.1	chr1	-1.51218	0.169947	1.11e-11	3.71e-11	-559023	Negative	lincRNA
ENSG00000196449	cg02460018	YRDC	chr1	2.0923	0.217289	1.12e-11	3.75e-11	-7216	Positive	protein_coding
ENSG00000052723	cg00771553	SIKE1	chr1	9.02072	0.925389	1.14e-11	3.81e-11	872125	Positive	protein_coding
ENSG00000270629	cg05349042	NBPF14	chr1	-9.15304	1.07311	1.16e-11	3.88e-11	-990135	Positive	protein_coding
ENSG00000184908	cg23269169	CLCNKB	chr1	-3.44382	0.34826	1.2e-11	4e-11	-323448	Negative	protein_coding
ENSG00000126070	cg18881764	AGO3	chr1	-11.1857	1.17411	1.23e-11	4.09e-11	372392	Negative	protein_coding
ENSG00000116977	cg20863821	LGALS8	chr1	21.0708	2.30465	1.26e-11	4.19e-11	574091	Positive	protein_coding
ENSG00000237973	cg05433637	MTCO1P12	chr1	110.386	10.2354	1.26e-11	4.19e-11	-944144	Negative	unprocessed_pseudogene
ENSG00000143207	cg15340874	RFWD2	chr1	8.13752	0.883066	1.27e-11	4.22e-11	-944346	Positive	protein_coding
ENSG00000127603	cg08648409	MACF1	chr1	291.515	30.8298	1.29e-11	4.28e-11	207808	Positive	protein_coding
ENSG00000143498	cg09866695	TAF1A	chr1	1.82372	0.197573	1.3e-11	4.31e-11	-983798	Positive	protein_coding
ENSG00000151414	cg03946186	NEK7	chr1	-17.6879	1.80192	1.34e-11	4.44e-11	-1868	Negative	protein_coding
ENSG00000177614	cg07011025	PGBD5	chr1	5.5542	0.599671	1.44e-11	4.76e-11	664202	Positive	protein_coding
ENSG00000254685	cg06997167	FPGT	chr1	-2.49723	0.284761	1.51e-11	4.98e-11	-382	Positive	protein_coding
ENSG00000134184	cg24506221	GSTM1	chr1	-4.68396	0.44049	1.54e-11	5.07e-11	35	Negative	protein_coding
ENSG00000174574	cg16181943	AKIRIN1	chr1	-5.42163	0.585192	1.55e-11	5.1e-11	-404237	Negative	protein_coding
ENSG00000060688	cg21270648	SNRNP40	chr1	-3.43063	0.381331	1.7e-11	5.57e-11	384909	Negative	protein_coding
ENSG00000117335	cg26327947	CD46	chr1	-109.341	10.7401	1.72e-11	5.63e-11	974417	Negative	protein_coding
ENSG00000116406	cg21678760	EDEM3	chr1	-26.7421	2.8324	1.84e-11	6.02e-11	-638949	Positive	protein_coding
ENSG00000163531	cg01111494	NFASC	chr1	-80.3087	8.45707	1.92e-11	6.27e-11	-399065	Positive	protein_coding
ENSG00000223649	cg09355428	RP11-359E8.3	chr1	0.382802	0.0408059	2.26e-11	7.33e-11	-975802	Positive	lincRNA
ENSG00000187801	cg25275331	ZFP69B	chr1	-0.425997	0.0459137	2.38e-11	7.71e-11	191839	Negative	protein_coding
ENSG00000117411	cg23736359	B4GALT2	chr1	6.53709	0.679736	2.49e-11	8.04e-11	-12779	Positive	protein_coding
ENSG00000224687	cg04958082	RASAL2-AS1	chr1	0.716288	0.0808482	2.49e-11	8.04e-11	708028	Positive	lincRNA
ENSG00000160818	cg13531446	GPATCH4	chr1	-3.25284	0.353501	2.62e-11	8.44e-11	-206575	Negative	protein_coding
ENSG00000162623	cg06997167	TYW3	chr1	-4.38571	0.509916	2.81e-11	9.03e-11	534558	Positive	protein_coding
ENSG00000269978	cg17079374	RP11-338N10.3	chr1	-1.56394	0.170694	2.86e-11	9.17e-11	-452752	Negative	lincRNA
ENSG00000162769	cg09195319	FLVCR1	chr1	10.9762	1.17313	2.87e-11	9.2e-11	56	Positive	protein_coding
ENSG00000143032	cg09257488	BARHL2	chr1	5.22257	0.548574	3.1e-11	9.9e-11	139729	Positive	protein_coding
ENSG00000230896	cg20650505	RP11-767N6.7	chr1	0.42865	0.0472747	3.49e-11	1.11e-10	368348	Positive	sense_intronic
ENSG00000117114	cg15997518	ADGRL2	chr1	-29.5733	3.43615	4.94e-11	1.55e-10	-43029	Negative	protein_coding
ENSG00000158850	cg27204405	B4GALT3	chr1	-3.76113	0.431438	5.02e-11	1.58e-10	538219	Negative	protein_coding
ENSG00000160716	cg27086051	CHRNB2	chr1	-18.9292	2.08662	5.15e-11	1.62e-10	-640842	Positive	protein_coding
ENSG00000162600	cg22485350	OMA1	chr1	-3.59228	0.402423	5.56e-11	1.74e-10	-992997	Positive	protein_coding
ENSG00000215788	cg23714370	TNFRSF25	chr1	-6.8214	0.662292	5.73e-11	1.79e-10	-288576	Negative	protein_coding
ENSG00000143127	cg03844923	ITGA10	chr1	-3.92545	0.450564	6.38e-11	1.98e-10	27420	Negative	protein_coding
ENSG00000116703	cg14172633	PDC	chr1	-563.194	64.0618	6.65e-11	2.06e-10	-709141	Negative	protein_coding
ENSG00000159164	cg17633422	SV2A	chr1	101.152	10.8538	7.2e-11	2.22e-10	-3778	Positive	protein_coding
ENSG00000011021	cg10169393	CLCN6	chr1	-9.11081	0.966561	8.43e-11	2.59e-10	-749774	Negative	protein_coding
ENSG00000142606	cg05753589	MMEL1	chr1	0.59279	0.057884	8.5e-11	2.61e-10	-457313	Positive	protein_coding
ENSG00000135778	cg00278134	NTPCR	chr1	-3.06191	0.347597	8.56e-11	2.63e-10	325341	Negative	protein_coding
ENSG00000179862	cg23729340	CITED4	chr1	-0.922252	0.0962617	9.88e-11	3.01e-10	-521202	Negative	protein_coding
ENSG00000226944	cg16416718	RP1-120G22.11	chr1	0.370538	0.0407192	9.91e-11	3.02e-10	579619	Positive	antisense
ENSG00000117480	cg23649500	FAAH	chr1	7.22772	0.80843	1.03e-10	3.13e-10	-829780	Positive	protein_coding
ENSG00000117013	cg14182166	KCNQ4	chr1	-6.81188	0.694566	1.17e-10	3.55e-10	740891	Negative	protein_coding
ENSG00000162604	cg25837719	TM2D1	chr1	-3.51654	0.401834	1.26e-10	3.81e-10	-598749	Negative	protein_coding
ENSG00000183615	cg22604123	FAM167B	chr1	-0.914891	0.0920096	1.28e-10	3.87e-10	-217699	Negative	protein_coding
ENSG00000189339	cg07424616	SLC35E2B	chr1	67.4117	7.43541	1.33e-10	4.01e-10	866446	Positive	protein_coding
ENSG00000186301	cg13612241	MST1P2	chr1	-1.6353	0.187051	1.37e-10	4.13e-10	-587545	Negative	unprocessed_pseudogene
ENSG00000090432	cg24221413	MUL1	chr1	-2.43274	0.267637	1.41e-10	4.24e-10	185747	Negative	protein_coding
ENSG00000127125	cg03346936	PPCS	chr1	4.77895	0.544133	1.68e-10	5.02e-10	-361347	Positive	protein_coding
ENSG00000175279	cg12035827	APITD1	chr1	-0.867192	0.0960301	1.78e-10	5.31e-10	-364736	Negative	protein_coding
ENSG00000143612	cg07429394	C1orf43	chr1	25.7665	2.7988	1.82e-10	5.42e-10	-260463	Negative	protein_coding
ENSG00000057252	cg03115649	SOAT1	chr1	8.07778	0.883862	1.85e-10	5.51e-10	-588686	Positive	protein_coding
ENSG00000060656	cg13075278	PTPRU	chr1	-77.1636	8.76332	1.93e-10	5.74e-10	907634	Negative	protein_coding
ENSG00000134245	cg00969680	WNT2B	chr1	6.52198	0.748105	1.99e-10	5.91e-10	-456924	Negative	protein_coding
ENSG00000173726	cg06812651	TOMM20	chr1	-25.2967	2.91249	2.12e-10	6.28e-10	-498988	Negative	protein_coding
ENSG00000132849	cg01173986	PATJ	chr1	-6.32089	0.790526	2.22e-10	6.56e-10	-853891	Negative	protein_coding
ENSG00000271121	cg13947666	NUDT4P2	chr1	0.728374	0.0720966	2.23e-10	6.59e-10	336378	Positive	processed_pseudogene
ENSG00000142686	cg08142775	C1orf216	chr1	-11.3697	1.26817	2.37e-10	6.99e-10	-681823	Negative	protein_coding
ENSG00000224358	cg15224822	RP11-466F5.8	chr1	-0.683261	0.0810848	2.46e-10	7.24e-10	-587	Negative	antisense
ENSG00000117419	cg20318713	ERI3	chr1	3.74256	0.426256	2.47e-10	7.27e-10	1118982	Negative	protein_coding
ENSG00000133056	cg21421634	PIK3C2B	chr1	6.17337	0.691186	2.47e-10	7.27e-10	-142079	Positive	protein_coding
ENSG00000088035	cg19963700	ALG6	chr1	1.68945	0.201448	2.49e-10	7.32e-10	-476147	Negative	protein_coding
ENSG00000143110	cg11379503	C1orf162	chr1	-1.68075	0.195584	2.49e-10	7.32e-10	707621	Negative	protein_coding
ENSG00000142655	cg21180178	PEX14	chr1	-37.4063	4.05607	2.53e-10	7.44e-10	439336	Negative	protein_coding
ENSG00000186510	cg26228591	CLCNKA	chr1	-6.62115	0.707463	2.55e-10	7.5e-10	290524	Negative	protein_coding
ENSG00000134186	cg01416227	PRPF38B	chr1	-13.664	1.49866	2.65e-10	7.78e-10	-791853	Negative	protein_coding
ENSG00000143398	cg13841804	PIP5K1A	chr1	12.5328	1.47015	3e-10	8.77e-10	962830	Positive	protein_coding
ENSG00000171735	cg24851249	CAMTA1	chr1	40.382	4.53388	3.03e-10	8.85e-10	-811044	Negative	protein_coding
ENSG00000116285	cg13253920	ERRFI1	chr1	14.7472	1.62138	3.35e-10	9.75e-10	193455	Positive	protein_coding
ENSG00000127054	cg05433637	CPSF3L	chr1	-37.0194	3.99203	3.89e-10	1.13e-09	263633	Negative	protein_coding
ENSG00000163349	cg19053839	HIPK1	chr1	-54.7298	6.80577	3.92e-10	1.14e-09	170397	Negative	protein_coding
ENSG00000117475	cg02837999	BLZF1	chr1	-4.76161	0.5472	4.48e-10	1.29e-09	-1073	Negative	protein_coding
ENSG00000154370	cg13295432	TRIM11	chr1	-3.22398	0.32414	5.11e-10	1.46e-09	-288068	Negative	protein_coding
ENSG00000170989	cg20083308	S1PR1	chr1	10.0761	1.17957	5.15e-10	1.47e-09	970766	Positive	protein_coding
ENSG00000160783	cg23184860	PMF1	chr1	-4.07131	0.451912	5.16e-10	1.48e-09	58130	Negative	protein_coding
ENSG00000168118	cg11161882	RAB4A	chr1	-9.89423	1.1089	5.39e-10	1.54e-09	864051	Positive	protein_coding
ENSG00000213047	cg03200818	DENND1B	chr1	-6.12405	0.709928	5.47e-10	1.56e-09	397656	Negative	protein_coding
ENSG00000163348	cg20713492	PYGO2	chr1	-5.4702	0.626657	5.48e-10	1.56e-09	-636020	Negative	protein_coding
ENSG00000181873	cg24826077	IBA57	chr1	2.30405	0.265284	5.68e-10	1.62e-09	403224	Negative	protein_coding
ENSG00000054523	cg19178679	KIF1B	chr1	-125.677	15.2558	5.85e-10	1.67e-09	-582546	Negative	protein_coding
ENSG00000180875	cg10092516	GREM2	chr1	-4.4109	0.552266	5.93e-10	1.69e-09	-349836	Negative	protein_coding
ENSG00000232995	cg13233534	RGS5	chr1	0.88894	0.103837	6.06e-10	1.72e-09	-682872	Negative	antisense
ENSG00000238009	cg16526047	RP11-34P13.7	chr1	-0.510547	0.0604239	6.47e-10	1.84e-09	925218	Negative	lincRNA
ENSG00000156171	cg01011619	DRAM2	chr1	-15.3793	1.70539	7.4e-10	2.09e-09	-153323	Negative	protein_coding
ENSG00000116350	cg27017906	SRSF4	chr1	-10.2877	1.14494	7.81e-10	2.2e-09	-396054	Negative	protein_coding
ENSG00000132780	cg06229859	NASP	chr1	-67.2294	7.03512	8.04e-10	2.27e-09	909168	Negative	protein_coding
ENSG00000225518	cg22492088	RP11-396C23.2	chr1	-0.518494	0.0544279	8.35e-10	2.35e-09	200634	Negative	lincRNA
ENSG00000142794	cg07384903	NBPF3	chr1	3.33865	0.4005	8.48e-10	2.39e-09	263029	Positive	protein_coding
ENSG00000143162	cg11966583	CREG1	chr1	26.5867	3.06435	8.61e-10	2.42e-09	-652876	Positive	protein_coding
ENSG00000159479	cg07532155	MED8	chr1	-9.07466	1.07689	9.05e-10	2.54e-09	146850	Negative	protein_coding
ENSG00000121900	cg17446216	TMEM54	chr1	-3.13167	0.360914	9.31e-10	2.61e-09	-879956	Negative	protein_coding
ENSG00000143633	cg07011025	C1orf131	chr1	-1.2264	0.133977	9.67e-10	2.71e-09	-245071	Negative	protein_coding
ENSG00000117479	cg17818559	SLC19A2	chr1	5.42212	0.640525	1e-09	2.8e-09	-356082	Negative	protein_coding
ENSG00000163462	cg11750116	TRIM46	chr1	1.17999	0.136277	1.06e-09	2.96e-09	88821	Negative	protein_coding
ENSG00000117143	cg24298107	UAP1	chr1	8.84376	0.867559	1.07e-09	2.98e-09	-908265	Positive	protein_coding
ENSG00000136628	cg21648401	EPRS	chr1	50.343	5.99815	1.1e-09	3.06e-09	-39581	Positive	protein_coding
ENSG00000116791	cg06366937	CRYZ	chr1	-6.70709	0.799731	1.23e-09	3.41e-09	-507239	Positive	protein_coding
ENSG00000160050	cg23864468	CCDC28B	chr1	-3.0414	0.363765	1.46e-09	4.03e-09	791677	Negative	protein_coding
ENSG00000153207	cg20478514	AHCTF1	chr1	14.6406	1.75653	1.6e-09	4.4e-09	-114936	Positive	protein_coding
ENSG00000132122	cg11915739	SPATA6	chr1	-4.66926	0.568952	1.67e-09	4.59e-09	177025	Negative	protein_coding
ENSG00000243710	cg04031129	CFAP57	chr1	1.41016	0.169212	1.68e-09	4.61e-09	-209	Positive	protein_coding
ENSG00000160062	cg15593269	ZBTB8A	chr1	0.884293	0.104964	1.78e-09	4.87e-09	-870936	Positive	protein_coding
ENSG00000040487	cg00759836	PQLC2	chr1	-9.22006	1.11645	1.79e-09	4.9e-09	60839	Positive	protein_coding
ENSG00000143469	cg09117778	SYT14	chr1	-13.6145	1.61793	1.82e-09	4.98e-09	692651	Negative	protein_coding
ENSG00000134243	cg11857025	SORT1	chr1	-36.3683	4.34766	1.89e-09	5.16e-09	-218846	Positive	protein_coding
ENSG00000135829	cg10240684	DHX9	chr1	63.919	7.79528	1.93e-09	5.27e-09	167	Positive	protein_coding
ENSG00000196878	cg04558166	LAMB3	chr1	-0.394293	0.0494407	1.94e-09	5.29e-09	213064	Negative	protein_coding
ENSG00000143013	cg20461704	LMO4	chr1	7.5457	0.964272	1.97e-09	5.37e-09	615279	Positive	protein_coding
ENSG00000158747	cg14446565	NBL1	chr1	7.3937	0.890752	2.02e-09	5.5e-09	112415	Positive	protein_coding
ENSG00000271380	cg19501842	RP11-307C12.12	chr1	-0.263306	0.0298856	2.11e-09	5.73e-09	115484	Negative	antisense
ENSG00000008128	cg15323084	CDK11A	chr1	9.19282	0.991567	2.43e-09	6.56e-09	-81052	Negative	protein_coding
ENSG00000127483	cg00631482	HP1BP3	chr1	-33.8203	3.89779	2.55e-09	6.87e-09	880049	Negative	protein_coding
ENSG00000146463	cg09070503	ZMYM4	chr1	20.9824	2.60482	2.7e-09	7.26e-09	-372564	Negative	protein_coding
ENSG00000134215	cg26634003	VAV3	chr1	-8.60539	1.07301	2.77e-09	7.44e-09	306231	Negative	protein_coding
ENSG00000117758	cg17798192	STX12	chr1	23.4857	2.87522	2.96e-09	7.94e-09	282940	Negative	protein_coding
ENSG00000152763	cg00295421	WDR78	chr1	2.51254	0.305905	3.08e-09	8.25e-09	117351	Positive	protein_coding
ENSG00000134717	cg05553634	BTF3L4	chr1	10.9088	1.33931	3.18e-09	8.51e-09	-786473	Positive	protein_coding
ENSG00000117010	cg11386025	ZNF684	chr1	-0.443098	0.0540524	3.23e-09	8.64e-09	-287337	Negative	protein_coding
ENSG00000081026	cg27077219	MAGI3	chr1	24.2161	2.89615	3.27e-09	8.74e-09	540557	Negative	protein_coding
ENSG00000152904	cg06812651	GGPS1	chr1	-5.73741	0.703187	3.37e-09	9e-09	716997	Positive	protein_coding
ENSG00000143222	cg27510197	UFC1	chr1	-16.0925	1.93196	3.38e-09	9.02e-09	947137	Positive	protein_coding
ENSG00000075945	cg10185029	KIFAP3	chr1	-16.3955	2.14316	3.61e-09	9.61e-09	611333	Positive	protein_coding
ENSG00000242252	cg08007199	BGLAP	chr1	-1.08061	0.121385	3.65e-09	9.71e-09	-489653	Negative	protein_coding
ENSG00000251503	cg09994936	APITD1-CORT	chr1	-0.763372	0.084644	3.96e-09	1.05e-08	-471817	Negative	protein_coding
ENSG00000142856	cg09208651	ITGB3BP	chr1	-2.04825	0.256797	4e-09	1.06e-08	802989	Negative	protein_coding
ENSG00000162482	cg09886037	AKR7A3	chr1	0.550708	0.0672528	4.09e-09	1.08e-08	641141	Positive	protein_coding
ENSG00000137936	cg15495124	BCAR3	chr1	-1.34618	0.163301	4.14e-09	1.1e-08	-599451	Negative	protein_coding
ENSG00000198492	cg19901472	YTHDF2	chr1	10.7575	1.29869	4.26e-09	1.13e-08	-494246	Negative	protein_coding
ENSG00000228084	cg12469756	RP5-884G6.2	chr1	-0.235295	0.0287427	4.65e-09	1.22e-08	-117491	Positive	antisense
ENSG00000116752	cg15182583	BCAS2	chr1	-11.1149	1.36402	4.77e-09	1.25e-08	-755099	Negative	protein_coding
ENSG00000260948	cg01083093	RP11-552M11.8	chr1	-1.61171	0.189752	4.84e-09	1.27e-08	45889	Negative	sense_overlapping
ENSG00000163344	cg09413064	PMVK	chr1	-9.73802	1.15972	4.87e-09	1.28e-08	-365794	Negative	protein_coding
ENSG00000162461	cg05946513	SLC25A34	chr1	-2.70819	0.280077	5.01e-09	1.31e-08	595138	Negative	protein_coding
ENSG00000162551	cg00165619	ALPL	chr1	-20.2193	2.31402	5.05e-09	1.32e-08	-1067197	Negative	protein_coding
ENSG00000162458	cg15644938	FBLIM1	chr1	-1.96252	0.223189	5.22e-09	1.37e-08	-596052	Negative	protein_coding
ENSG00000198842	cg20879958	DUSP27	chr1	-3.25651	0.346527	5.22e-09	1.37e-08	-390098	Negative	protein_coding
ENSG00000162851	cg20478514	TFB2M	chr1	1.37957	0.172862	5.97e-09	1.55e-08	183601	Positive	protein_coding
ENSG00000182749	cg11238986	PAQR7	chr1	-1.3021	0.150852	6.32e-09	1.64e-08	669967	Positive	protein_coding
ENSG00000142669	cg01349024	SH3BGRL3	chr1	-11.739	1.3665	6.72e-09	1.74e-08	504551	Negative	protein_coding
ENSG00000092978	cg12668928	GPATCH2	chr1	-2.40493	0.311973	6.85e-09	1.77e-08	744483	Positive	protein_coding
ENSG00000085433	cg05651418	WDR47	chr1	71.2097	9.04097	7.02e-09	1.81e-08	456068	Positive	protein_coding
ENSG00000159346	cg21142038	ADIPOR1	chr1	-57.7546	7.22051	7.15e-09	1.85e-08	-726510	Negative	protein_coding
ENSG00000162664	cg25026529	ZNF326	chr1	-92.572	11.3944	7.16e-09	1.85e-08	-722384	Negative	protein_coding
ENSG00000158156	cg10400390	XKR8	chr1	-1.34065	0.163456	7.82e-09	2.01e-08	432176	Negative	protein_coding
ENSG00000162409	cg22485350	PRKAA2	chr1	-20.4896	2.7071	8.33e-09	2.14e-08	-777073	Negative	protein_coding
ENSG00000162542	cg15015194	TMCO4	chr1	2.21442	0.25126	8.34e-09	2.14e-08	825711	Positive	protein_coding
ENSG00000224167	cg18848478	RP3-522D1.1	chr1	1.52584	0.18275	8.46e-09	2.17e-08	-540980	Positive	lincRNA
ENSG00000127481	cg08244959	UBR4	chr1	42.254	5.22123	8.68e-09	2.23e-08	-966230	Positive	protein_coding
ENSG00000178104	cg03659817	PDE4DIP	chr1	-96.628	12.6545	8.69e-09	2.23e-08	-1128883	Negative	protein_coding
ENSG00000185519	cg00075019	FAM131C	chr1	-6.93624	0.698928	8.83e-09	2.26e-08	179500	Positive	protein_coding
ENSG00000168243	cg12009109	GNG4	chr1	7.50158	0.859341	9.71e-09	2.48e-08	-219405	Negative	protein_coding
ENSG00000185842	cg14971781	DNAH14	chr1	5.36699	0.634808	1.03e-08	2.62e-08	-1290790	Positive	protein_coding
ENSG00000268869	cg18117094	ESPNP	chr1	-1.37636	0.150862	1.07e-08	2.72e-08	226555	Negative	transcribed_unprocessed_pseudogene
ENSG00000277147	cg00438783	LINC00869	chr1	1.87892	0.232106	1.09e-08	2.77e-08	-909417	Positive	lincRNA
ENSG00000198746	cg17798192	GPATCH3	chr1	-2.68936	0.33382	1.1e-08	2.79e-08	599791	Negative	protein_coding
ENSG00000227372	cg12473797	TP73-AS1	chr1	6.33855	0.770741	1.1e-08	2.79e-08	-615717	Positive	unitary_pseudogene
ENSG00000280649	cg14002175	AC245100.1	chr1	0.396396	0.0514494	1.1e-08	2.79e-08	917363	Positive	protein_coding
ENSG00000054118	cg22615819	THRAP3	chr1	20.8224	2.64566	1.2e-08	3.03e-08	293723	Negative	protein_coding
ENSG00000135744	cg03525122	AGT	chr1	12.1652	1.53126	1.25e-08	3.16e-08	-634487	Positive	protein_coding
ENSG00000198815	cg01642049	FOXJ3	chr1	26.6486	2.88746	1.25e-08	3.16e-08	590672	Positive	protein_coding
ENSG00000203739	cg25613247	RP11-296O14.3	chr1	0.643826	0.0821871	1.3e-08	3.28e-08	297075	Positive	antisense
ENSG00000234329	cg04181682	RP11-767N6.2	chr1	-0.208144	0.0262876	1.31e-08	3.3e-08	457319	Negative	processed_pseudogene
ENSG00000163873	cg21418854	GRIK3	chr1	-14.695	1.80229	1.35e-08	3.4e-08	-489347	Negative	protein_coding
ENSG00000265808	cg04857033	SEC22B	chr1	49.6702	6.77491	1.39e-08	3.49e-08	-435109	Negative	protein_coding
ENSG00000231181	cg05659310	RP13-15M17.1	chr1	0.292757	0.0370215	1.42e-08	3.57e-08	491079	Positive	processed_pseudogene
ENSG00000183726	cg11383397	TMEM50A	chr1	11.57	1.39983	1.44e-08	3.61e-08	-521305	Negative	protein_coding
ENSG00000162444	cg13374225	RBP7	chr1	-0.923489	0.107252	1.53e-08	3.83e-08	-36560	Negative	protein_coding
ENSG00000231663	cg04205689	RP5-827C21.4	chr1	1.19927	0.131775	1.64e-08	4.1e-08	-62	Positive	antisense
ENSG00000132702	cg19398794	HAPLN2	chr1	-0.689115	0.0681305	1.67e-08	4.17e-08	537439	Positive	protein_coding
ENSG00000163867	cg18881764	ZMYM6	chr1	-6.54978	0.838833	1.67e-08	4.17e-08	572161	Negative	protein_coding
ENSG00000260855	cg17427154	RP11-439E19.10	chr1	4.38686	0.55721	1.92e-08	4.77e-08	48223	Positive	antisense
ENSG00000143554	cg00395056	SLC27A3	chr1	-2.8232	0.361147	1.97e-08	4.89e-08	93668	Negative	protein_coding
ENSG00000116329	cg06874758	OPRD1	chr1	0.795365	0.0984653	2.06e-08	5.1e-08	-370073	Positive	protein_coding
ENSG00000229447	cg27650656	RP11-490K7.4	chr1	0.225992	0.0289143	2.1e-08	5.19e-08	444573	Negative	processed_pseudogene
ENSG00000132879	cg08202444	FBXO44	chr1	-11.2726	1.45801	2.16e-08	5.33e-08	-379	Negative	protein_coding
ENSG00000222009	cg06788803	BTBD19	chr1	-1.13821	0.132914	2.2e-08	5.43e-08	-531794	Negative	protein_coding
ENSG00000179397	cg01571579	C1orf101	chr1	-1.24764	0.158311	2.28e-08	5.62e-08	2082	Negative	protein_coding
ENSG00000008130	cg22599150	NADK	chr1	-7.86799	0.979158	2.31e-08	5.69e-08	-769494	Negative	protein_coding
ENSG00000196369	cg16801686	SRGAP2B	chr1	3.28415	0.442819	2.31e-08	5.69e-08	1031377	Positive	protein_coding
ENSG00000160710	cg19939555	ADAR	chr1	58.2842	7.10071	2.34e-08	5.76e-08	-623384	Positive	protein_coding
ENSG00000143157	cg22788606	POGK	chr1	-10.2985	1.34773	2.37e-08	5.83e-08	-615510	Positive	protein_coding
ENSG00000188859	cg15173270	FAM78B	chr1	-4.10526	0.541704	2.37e-08	5.83e-08	-912619	Negative	protein_coding
ENSG00000116221	cg05335806	MRPL37	chr1	-3.27381	0.410077	2.41e-08	5.93e-08	-438829	Negative	protein_coding
ENSG00000049246	cg17614383	PER3	chr1	-45.7982	5.77597	2.43e-08	5.97e-08	999347	Negative	protein_coding
ENSG00000273136	cg24482350	NBPF26	chr1	13.2032	1.87967	2.56e-08	6.28e-08	956551	Positive	protein_coding
ENSG00000135776	cg12061711	ABCB10	chr1	3.97579	0.516772	2.72e-08	6.66e-08	-8186	Positive	protein_coding
ENSG00000121931	cg17827850	LRIF1	chr1	8.91954	1.10232	2.76e-08	6.75e-08	-539427	Positive	protein_coding
ENSG00000163875	cg11521434	MEAF6	chr1	9.50386	1.18141	2.77e-08	6.77e-08	269134	Positive	protein_coding
ENSG00000174606	cg04203508	ANGEL2	chr1	-6.79178	0.888458	3.25e-08	7.9e-08	-385992	Negative	protein_coding
ENSG00000261168	cg03541057	RP11-68I18.10	chr1	-0.584664	0.0743656	3.42e-08	8.3e-08	-896178	Negative	sense_overlapping
ENSG00000162704	cg21678760	ARPC5	chr1	-8.51638	1.07326	3.49e-08	8.47e-08	430442	Negative	protein_coding
ENSG00000173171	cg06643584	MTX1	chr1	-1.84251	0.224641	3.53e-08	8.56e-08	-762516	Negative	protein_coding
ENSG00000117016	cg19416230	RIMS3	chr1	10.5067	1.32126	3.57e-08	8.65e-08	855572	Positive	protein_coding
ENSG00000183386	cg08648409	FHL3	chr1	-0.966231	0.121548	3.57e-08	8.65e-08	876738	Positive	protein_coding
ENSG00000188290	cg23537515	HES4	chr1	-7.31178	0.673969	4.15e-08	1e-07	422579	Negative	protein_coding
ENSG00000156876	cg13545645	SASS6	chr1	-3.06963	0.407497	4.45e-08	1.07e-07	182963	Negative	protein_coding
ENSG00000117616	cg08972581	RSRP1	chr1	-18.4839	2.32903	4.62e-08	1.11e-07	577138	Negative	protein_coding
ENSG00000158062	cg14017991	UBXN11	chr1	-25.7109	3.31996	4.73e-08	1.13e-07	-47039	Negative	protein_coding
ENSG00000082512	cg25467833	TRAF5	chr1	-1.10949	0.142068	4.97e-08	1.19e-07	-835104	Positive	protein_coding
ENSG00000084636	cg22604123	COL16A1	chr1	-64.2825	5.82426	5.01e-08	1.2e-07	812658	Negative	protein_coding
ENSG00000143363	cg07367563	PRUNE1	chr1	-1.96423	0.250515	5.07e-08	1.21e-07	-51172	Negative	protein_coding
ENSG00000116266	cg04922908	STXBP3	chr1	-23.5598	2.9035	5.41e-08	1.29e-07	-737040	Negative	protein_coding
ENSG00000083444	cg13868520	PLOD1	chr1	12.7348	1.61909	5.47e-08	1.3e-07	-144944	Positive	protein_coding
ENSG00000092969	cg24410255	TGFB2	chr1	18.5646	2.43991	5.52e-08	1.31e-07	420085	Negative	protein_coding
ENSG00000203666	cg17094624	EFCAB2	chr1	-12.3836	1.68556	5.59e-08	1.33e-07	-121660	Negative	protein_coding
ENSG00000260238	cg20795117	PMF1-BGLAP	chr1	1.36654	0.175544	5.61e-08	1.33e-07	950522	Negative	protein_coding
ENSG00000067208	cg04129046	EVI5	chr1	4.84747	0.654434	5.66e-08	1.35e-07	671888	Positive	protein_coding
ENSG00000173614	cg05655022	NMNAT1	chr1	1.2271	0.162429	5.78e-08	1.37e-07	-1021010	Positive	protein_coding
ENSG00000143543	cg12205230	JTB	chr1	-5.86767	0.769126	5.91e-08	1.4e-07	218206	Negative	protein_coding
ENSG00000154309	cg10103442	DISP1	chr1	1.37809	0.183095	6.01e-08	1.42e-07	406760	Negative	protein_coding
ENSG00000058804	cg26832062	NDC1	chr1	3.35834	0.436779	6.13e-08	1.45e-07	72701	Negative	protein_coding
ENSG00000143164	cg20540042	DCAF6	chr1	-12.1331	1.63582	6.43e-08	1.52e-07	715028	Negative	protein_coding
ENSG00000065135	cg01854652	GNAI3	chr1	-11.3737	1.43122	6.52e-08	1.54e-07	-661452	Positive	protein_coding
ENSG00000116874	cg01717524	WARS2	chr1	-5.14067	0.709508	6.58e-08	1.55e-07	631041	Negative	protein_coding
ENSG00000271425	cg17452625	NBPF10	chr1	3.95162	0.537392	6.63e-08	1.56e-07	-292919	Positive	protein_coding
ENSG00000084072	cg07883627	PPIE	chr1	6.86951	0.911884	6.84e-08	1.61e-07	-46539	Positive	protein_coding
ENSG00000272106	cg07010566	RP11-345P4.9	chr1	-6.49141	0.831215	7.18e-08	1.69e-07	-185511	Negative	antisense
ENSG00000116260	cg13229709	QSOX1	chr1	30.1639	3.91492	7.46e-08	1.75e-07	-206027	Negative	protein_coding
ENSG00000280670	cg11803389	CCDC163P	chr1	-5.612	0.737767	7.58e-08	1.78e-07	5482	Negative	protein_coding
ENSG00000185104	cg22611633	FAF1	chr1	-7.78352	1.04441	7.68e-08	1.8e-07	1441617	Negative	protein_coding
ENSG00000183853	cg12609498	KIRREL	chr1	-6.52178	0.884953	7.85e-08	1.84e-07	-109848	Negative	protein_coding
ENSG00000204138	cg10846285	PHACTR4	chr1	-5.58925	0.73479	8.06e-08	1.89e-07	-812494	Negative	protein_coding
ENSG00000084070	cg02998018	SMAP2	chr1	-12.4523	1.72312	8.12e-08	1.9e-07	304740	Negative	protein_coding
ENSG00000270882	cg17675141	HIST2H4A	chr1	-4.76347	0.624645	8.63e-08	2.02e-07	-403474	Negative	protein_coding
ENSG00000175984	cg19234509	DENND2C	chr1	2.06703	0.277002	9e-08	2.1e-07	-1224	Positive	protein_coding
ENSG00000162545	cg05805297	CAMK2N1	chr1	15.9781	2.03708	9.16e-08	2.13e-07	-191555	Negative	protein_coding
ENSG00000027869	cg16554222	SH2D2A	chr1	-2.61244	0.33072	9.25e-08	2.16e-07	-424301	Negative	protein_coding
ENSG00000171608	cg16050974	PIK3CD	chr1	-1.13414	0.142842	9.48e-08	2.21e-07	-345910	Negative	protein_coding
ENSG00000125945	cg13468252	ZNF436	chr1	12.5636	1.68858	9.5e-08	2.21e-07	418719	Positive	protein_coding
ENSG00000143537	cg13010483	ADAM15	chr1	-14.9763	1.99377	9.6e-08	2.23e-07	-250498	Negative	protein_coding
ENSG00000132781	cg19286674	MUTYH	chr1	-6.22607	0.813772	1.03e-07	2.39e-07	-342417	Negative	protein_coding
ENSG00000220785	cg10307600	MTMR9LP	chr1	-0.905252	0.115978	1.03e-07	2.39e-07	733055	Negative	transcribed_unprocessed_pseudogene
ENSG00000143416	cg22682031	SELENBP1	chr1	-4.65465	0.541021	1.04e-07	2.41e-07	248230	Positive	protein_coding
ENSG00000118873	cg15356516	RAB3GAP2	chr1	-9.38276	1.32798	1.05e-07	2.43e-07	731878	Negative	protein_coding
ENSG00000117859	cg12688215	OSBPL9	chr1	24.6958	3.33715	1.06e-07	2.45e-07	-456377	Positive	protein_coding
ENSG00000116783	cg17589384	TNNI3K	chr1	-1.99967	0.278978	1.07e-07	2.47e-07	37010	Negative	protein_coding
ENSG00000272033	cg12933719	RP11-52A20.2	chr1	1.00818	0.10814	1.07e-07	2.47e-07	152930	Negative	sense_intronic
ENSG00000116147	cg20164016	TNR	chr1	-59.7906	7.92697	1.16e-07	2.68e-07	190141	Negative	protein_coding
ENSG00000081019	cg27077219	RSBN1	chr1	14.3004	1.98618	1.21e-07	2.79e-07	-911874	Negative	protein_coding
ENSG00000275678	cg12312765	RP4-547N15.3	chr1	0.707949	0.0953118	1.27e-07	2.92e-07	-593731	Positive	sense_intronic
ENSG00000177606	cg12475701	JUN	chr1	83.2179	9.53537	1.29e-07	2.96e-07	-233836	Negative	protein_coding
ENSG00000118197	cg05519235	DDX59	chr1	-1.73963	0.226215	1.35e-07	3.1e-07	-581444	Negative	protein_coding
ENSG00000117643	cg25603198	MAN1C1	chr1	-18.2865	2.474	1.4e-07	3.21e-07	-242192	Negative	protein_coding
ENSG00000143183	cg19778201	TMCO1	chr1	9.31152	1.29098	1.41e-07	3.23e-07	-26080	Positive	protein_coding
ENSG00000169224	cg02713706	GCSAML	chr1	-0.518177	0.0644009	1.41e-07	3.23e-07	-11389	Negative	protein_coding
ENSG00000116885	cg16699316	OSCP1	chr1	-3.02091	0.425063	1.57e-07	3.58e-07	48647	Negative	protein_coding
ENSG00000224066	cg18270627	RP4-622L5.7	chr1	-0.724634	0.0835815	1.65e-07	3.76e-07	17527	Negative	antisense
ENSG00000131233	cg06848790	GJA9	chr1	0.319219	0.0448114	1.69e-07	3.85e-07	759247	Positive	protein_coding
ENSG00000160781	cg03055346	PAQR6	chr1	9.63984	1.14777	1.7e-07	3.87e-07	616968	Positive	protein_coding
ENSG00000137968	cg17556056	SLC44A5	chr1	-1.08707	0.13943	1.81e-07	4.11e-07	31422	Negative	protein_coding
ENSG00000162543	cg08225634	UBXN10	chr1	2.45096	0.329265	1.87e-07	4.24e-07	-498554	Positive	protein_coding
ENSG00000163155	cg13625205	LYSMD1	chr1	-6.92908	0.747484	1.92e-07	4.35e-07	452678	Negative	protein_coding
ENSG00000162526	cg13279856	TSSK3	chr1	-0.278025	0.0375138	1.98e-07	4.47e-07	-299658	Negative	protein_coding
ENSG00000143314	cg21284779	MRPL24	chr1	-4.1569	0.541009	2.13e-07	4.8e-07	-796568	Negative	protein_coding
ENSG00000143569	cg16725377	UBAP2L	chr1	-20.2861	2.69283	2.14e-07	4.82e-07	673569	Negative	protein_coding
ENSG00000203685	cg02033788	STUM	chr1	-6.47952	0.845137	2.15e-07	4.84e-07	426357	Negative	protein_coding
ENSG00000143190	cg11966583	POU2F1	chr1	32.2633	4.55473	2.17e-07	4.88e-07	344635	Positive	protein_coding
ENSG00000197989	cg08857906	SNHG12	chr1	-8.67513	0.880169	2.21e-07	4.97e-07	-748050	Negative	antisense
ENSG00000162521	cg04680037	RBBP4	chr1	71.147	9.34096	2.25e-07	5.06e-07	-313740	Positive	protein_coding
ENSG00000162607	cg02063560	USP1	chr1	26.6131	3.86826	2.27e-07	5.1e-07	781564	Positive	protein_coding
ENSG00000221978	cg10934589	CCNL2	chr1	19.1912	2.5403	2.27e-07	5.1e-07	661999	Positive	protein_coding
ENSG00000119283	cg12068761	TRIM67	chr1	9.85329	1.3962	2.32e-07	5.2e-07	735436	Negative	protein_coding
ENSG00000196189	cg08007199	SEMA4A	chr1	-3.72768	0.44488	2.35e-07	5.27e-07	-584471	Negative	protein_coding
ENSG00000143753	cg09020330	DEGS1	chr1	-4.80876	0.65258	2.4e-07	5.37e-07	-181077	Positive	protein_coding
ENSG00000235545	cg15654686	RP11-230B22.1	chr1	-0.199691	0.02749	2.42e-07	5.42e-07	-834929	Negative	antisense
ENSG00000116918	cg13881199	TSNAX	chr1	-39.0421	5.391	2.5e-07	5.58e-07	366110	Negative	protein_coding
ENSG00000159023	cg21062556	EPB41	chr1	-73.854	9.95485	2.52e-07	5.63e-07	381821	Negative	protein_coding
ENSG00000094975	cg14376275	SUCO	chr1	-24.4737	3.25382	2.55e-07	5.69e-07	690919	Negative	protein_coding
ENSG00000198468	cg12596505	FLVCR1-AS1	chr1	-2.24513	0.324564	2.7e-07	6.01e-07	64793	Negative	lincRNA
ENSG00000143434	cg05060677	SEMA6C	chr1	-6.05142	0.7955	2.75e-07	6.12e-07	-123136	Negative	protein_coding
ENSG00000142632	cg26923754	ARHGEF19	chr1	-0.975121	0.119858	2.94e-07	6.53e-07	-461227	Negative	protein_coding
ENSG00000143457	cg20811730	GOLPH3L	chr1	-2.13267	0.285279	2.95e-07	6.55e-07	-324777	Negative	protein_coding
ENSG00000116539	cg23288653	ASH1L	chr1	61.4653	8.31806	3.04e-07	6.74e-07	-161964	Positive	protein_coding
ENSG00000269925	cg13253920	RP3-467L1.6	chr1	0.308415	0.0436903	3.21e-07	7.1e-07	-421476	Positive	sense_intronic
ENSG00000183814	cg00951024	LIN9	chr1	1.88455	0.257461	3.32e-07	7.34e-07	176896	Positive	protein_coding
ENSG00000117407	cg09266468	ARTN	chr1	-1.06721	0.139581	3.38e-07	7.47e-07	-842588	Negative	protein_coding
ENSG00000168389	cg21162694	MFSD2A	chr1	5.79035	0.662413	3.39e-07	7.49e-07	-494671	Positive	protein_coding
ENSG00000266028	cg19452316	SRGAP2	chr1	-7.59166	1.05428	3.48e-07	7.68e-07	-304288	Positive	protein_coding
ENSG00000143742	cg14971781	SRP9	chr1	94.5726	13.4961	3.61e-07	7.95e-07	-409239	Negative	protein_coding
ENSG00000188641	cg24682415	DPYD	chr1	-3.39521	0.475187	3.61e-07	7.95e-07	67404	Negative	protein_coding
ENSG00000116560	cg04263115	SFPQ	chr1	74.6163	10.7328	3.74e-07	8.22e-07	593702	Positive	protein_coding
ENSG00000116830	cg13684632	TTF2	chr1	2.90176	0.395585	3.9e-07	8.56e-07	-761144	Positive	protein_coding
ENSG00000066056	cg17213946	TIE1	chr1	1.22382	0.149505	3.92e-07	8.61e-07	-230863	Positive	protein_coding
ENSG00000143774	cg24610866	GUK1	chr1	107.732	15.4458	4.26e-07	9.33e-07	193240	Positive	protein_coding
ENSG00000198483	cg19930199	ANKRD35	chr1	3.12353	0.420307	4.31e-07	9.43e-07	91294	Positive	protein_coding
ENSG00000143702	cg05090186	CEP170	chr1	-7.35779	1.02532	4.46e-07	9.75e-07	927713	Negative	protein_coding
ENSG00000280099	cg00062020	RP11-33E12.2	chr1	-2.12367	0.308738	4.48e-07	9.79e-07	-517351	Negative	TEC
ENSG00000158793	cg24592207	NIT1	chr1	-1.8192	0.262409	4.52e-07	9.87e-07	-107940	Negative	protein_coding
ENSG00000158615	cg13056222	PPP1R15B	chr1	17.5805	2.19454	4.53e-07	9.89e-07	-153310	Positive	protein_coding
ENSG00000117528	cg01814632	ABCD3	chr1	16.5956	2.39482	4.55e-07	9.93e-07	-202335	Negative	protein_coding
ENSG00000123473	cg02076414	STIL	chr1	1.15503	0.162578	4.63e-07	1.01e-06	64110	Positive	protein_coding
ENSG00000203667	cg13318537	COX20	chr1	58.6818	8.08371	4.63e-07	1.01e-06	633	Negative	protein_coding
ENSG00000260805	ch.1.4129519F	RP11-61J19.5	chr1	0.31244	0.0432172	4.66e-07	1.02e-06	-493060	Positive	lincRNA
ENSG00000125703	cg19963700	ATG4C	chr1	1.50222	0.227234	4.92e-07	1.07e-06	-1059590	Positive	protein_coding
ENSG00000143228	cg16604136	NUF2	chr1	-1.69043	0.242676	5.02e-07	1.09e-06	-55127	Negative	protein_coding
ENSG00000197747	cg20634798	S100A10	chr1	8.64743	1.1599	5.05e-07	1.1e-06	639960	Positive	protein_coding
ENSG00000198691	cg12578791	ABCA4	chr1	459.166	66.5817	5.34e-07	1.16e-06	425799	Negative	protein_coding
ENSG00000270276	cg21284400	HIST2H4B	chr1	5.33811	0.658679	5.34e-07	1.16e-06	155660	Negative	protein_coding
ENSG00000253368	cg09844983	TRNP1	chr1	82.2848	11.2929	5.42e-07	1.17e-06	-920511	Positive	protein_coding
ENSG00000228436	cg08648409	RP5-864K19.4	chr1	-0.386151	0.0536181	5.43e-07	1.17e-06	-13596	Negative	antisense
ENSG00000157881	cg18282011	PANK4	chr1	-22.3926	3.05854	5.9e-07	1.27e-06	-849545	Negative	protein_coding
ENSG00000155380	cg27077219	SLC16A1	chr1	34.2275	4.9791	6.07e-07	1.31e-06	-61889	Positive	protein_coding
ENSG00000159214	cg19286674	CCDC24	chr1	-7.77483	1.06201	6.15e-07	1.32e-06	-995387	Positive	protein_coding
ENSG00000120656	cg04990056	TAF12	chr1	-1.4312	0.19759	6.16e-07	1.33e-06	-815958	Negative	protein_coding
ENSG00000160097	cg16127059	FNDC5	chr1	-10.6153	1.46767	6.28e-07	1.35e-06	19812	Negative	protein_coding
ENSG00000271723	cg03752759	MROH7-TTC4	chr1	-10.9147	1.4578	6.29e-07	1.35e-06	751804	Negative	protein_coding
ENSG00000162631	cg01342222	NTNG1	chr1	4.85122	0.658449	6.76e-07	1.45e-06	-1061250	Positive	protein_coding
ENSG00000198797	cg11851207	BRINP2	chr1	-0.821802	0.12633	7.64e-07	1.63e-06	963632	Negative	protein_coding
ENSG00000235919	cg22234827	ASH1L-AS1	chr1	-0.846464	0.113788	7.81e-07	1.66e-06	587402	Negative	antisense
ENSG00000274944	cg20088882	RP5-864K19.6	chr1	-0.583255	0.0825417	8.2e-07	1.74e-06	77451	Negative	protein_coding
ENSG00000116747	cg11512129	TROVE2	chr1	26.6392	4.17199	8.63e-07	1.83e-06	-122727	Negative	protein_coding
ENSG00000116761	cg21004042	CTH	chr1	-2.62064	0.388392	8.66e-07	1.84e-06	842999	Negative	protein_coding
ENSG00000126067	cg05266437	PSMB2	chr1	-14.2584	1.70343	8.83e-07	1.87e-06	874035	Positive	protein_coding
ENSG00000238198	cg19722720	RP11-31F15.2	chr1	-1.53317	0.216069	8.97e-07	1.9e-06	-502956	Negative	lincRNA
ENSG00000159176	cg27313021	CSRP1	chr1	-22.1431	2.843	9.03e-07	1.91e-06	639337	Negative	protein_coding
ENSG00000237188	cg08682063	RP11-337C18.8	chr1	0.680358	0.102677	9.03e-07	1.91e-06	-427435	Positive	antisense
ENSG00000162642	cg10879116	C1orf52	chr1	-5.92509	0.856565	9.28e-07	1.96e-06	-357159	Positive	protein_coding
ENSG00000135750	cg08765573	KCNK1	chr1	-13.815	2.03654	9.47e-07	2e-06	-648817	Negative	protein_coding
ENSG00000196517	cg04391356	SLC6A9	chr1	16.5693	2.28449	9.52e-07	2.01e-06	-537525	Positive	protein_coding
ENSG00000037637	cg05510104	FBXO42	chr1	8.10163	1.1119	9.97e-07	2.1e-06	-510600	Positive	protein_coding
ENSG00000117640	cg11238986	MTFR1L	chr1	8.01108	1.10989	1.01e-06	2.13e-06	-712537	Positive	protein_coding
ENSG00000134748	cg04869063	PRPF38A	chr1	12.3995	1.63714	1.03e-06	2.17e-06	-961114	Positive	protein_coding
ENSG00000261737	cg17907457	RP4-612B15.3	chr1	-0.277589	0.0417898	1.05e-06	2.21e-06	247412	Negative	antisense
ENSG00000197982	cg14962584	C1orf122	chr1	8.0376	1.17773	1.06e-06	2.23e-06	953034	Positive	protein_coding
ENSG00000142798	cg06912792	HSPG2	chr1	3.98649	0.402825	1.08e-06	2.27e-06	267998	Negative	protein_coding
ENSG00000280378	cg20699740	RP4-758J24.6	chr1	-0.348791	0.0501076	1.08e-06	2.27e-06	15371	Negative	TEC
ENSG00000070886	cg05941864	EPHA8	chr1	-8.27022	1.08662	1.11e-06	2.33e-06	-3996	Negative	protein_coding
ENSG00000117020	cg13318537	AKT3	chr1	66.2399	9.05648	1.12e-06	2.35e-06	1346750	Negative	protein_coding
ENSG00000143493	cg13807351	INTS7	chr1	4.78676	0.697415	1.2e-06	2.51e-06	344995	Negative	protein_coding
ENSG00000143436	cg09275655	MRPL9	chr1	-3.02265	0.427792	1.27e-06	2.65e-06	-42536	Negative	protein_coding
ENSG00000223804	cg15379564	CH17-472G23.2	chr1	-1.40274	0.216175	1.29e-06	2.69e-06	-396145	Negative	transcribed_unprocessed_pseudogene
ENSG00000243480	cg07878955	AMY2A	chr1	-0.564526	0.0911702	1.32e-06	2.75e-06	90945	Negative	protein_coding
ENSG00000162702	cg07148880	ZNF281	chr1	5.56003	0.801636	1.34e-06	2.79e-06	618720	Positive	protein_coding
ENSG00000143614	cg05066693	GATAD2B	chr1	10.7025	1.53865	1.39e-06	2.89e-06	-820361	Positive	protein_coding
ENSG00000143819	cg23096144	EPHX1	chr1	-20.4704	2.53561	1.45e-06	3.01e-06	-15161	Negative	protein_coding
ENSG00000160789	cg24685761	LMNA	chr1	10.4867	0.855488	1.49e-06	3.09e-06	-200788	Positive	protein_coding
ENSG00000162757	cg20589567	C1orf74	chr1	-0.686468	0.101226	1.49e-06	3.09e-06	-381652	Negative	protein_coding
ENSG00000142733	cg10489986	MAP3K6	chr1	4.80633	0.583654	1.51e-06	3.13e-06	-359615	Positive	protein_coding
ENSG00000163362	cg16029189	C1orf106	chr1	-0.98547	0.133327	1.63e-06	3.37e-06	-644261	Negative	protein_coding
ENSG00000215883	cg01902939	CYB5RL	chr1	-3.53173	0.535384	1.63e-06	3.37e-06	-331094	Negative	protein_coding
ENSG00000242861	cg03745431	RP11-285F7.2	chr1	0.828436	0.107368	1.64e-06	3.39e-06	708129	Positive	antisense
ENSG00000143458	cg27405014	GABPB2	chr1	-3.18938	0.435758	1.67e-06	3.45e-06	-276209	Negative	protein_coding
ENSG00000085491	cg25527125	SLC25A24	chr1	8.19561	1.25323	1.74e-06	3.59e-06	742920	Negative	protein_coding
ENSG00000121775	cg10575369	TMEM39B	chr1	2.02615	0.29664	1.75e-06	3.6e-06	320034	Positive	protein_coding
ENSG00000180758	cg17742334	GPR157	chr1	-2.53836	0.337735	1.81e-06	3.72e-06	328766	Negative	protein_coding
ENSG00000254539	cg20292245	RP4-791M13.3	chr1	2.28615	0.361291	1.86e-06	3.82e-06	-1002207	Negative	lincRNA
ENSG00000211451	cg18879829	GNRHR2	chr1	-0.789701	0.119214	1.87e-06	3.84e-06	-77924	Negative	unitary_pseudogene
ENSG00000214114	cg12714180	MYCBP	chr1	-1.8914	0.280161	1.9e-06	3.9e-06	-815915	Negative	protein_coding
ENSG00000122483	cg05395817	CCDC18	chr1	0.414712	0.0569349	1.91e-06	3.92e-06	781114	Positive	protein_coding
ENSG00000117054	cg11842415	ACADM	chr1	-7.77277	1.20186	2e-06	4.09e-06	590365	Positive	protein_coding
ENSG00000117425	cg04400540	PTCH2	chr1	1.79805	0.26481	2.02e-06	4.13e-06	-845274	Positive	protein_coding
ENSG00000272150	cg03805558	NBPF25P	chr1	1.30799	0.19308	2.04e-06	4.17e-06	346337	Positive	transcribed_unprocessed_pseudogene
ENSG00000123091	cg04028306	RNF11	chr1	20.9111	3.11657	2.05e-06	4.19e-06	130219	Negative	protein_coding
ENSG00000198793	cg19602920	MTOR	chr1	-12.8672	1.86444	2.46e-06	4.99e-06	912685	Negative	protein_coding
ENSG00000142611	cg19359929	PRDM16	chr1	-0.83114	0.0975294	2.55e-06	5.17e-06	-556031	Negative	protein_coding
ENSG00000130770	cg04993605	ATPIF1	chr1	-4.24337	0.625656	2.58e-06	5.22e-06	-10432	Negative	protein_coding
ENSG00000117155	cg10879116	SSX2IP	chr1	-201.028	30.1126	2.72e-06	5.49e-06	249087	Negative	protein_coding
ENSG00000118292	cg12072973	C1orf54	chr1	1.4843	0.190861	2.73e-06	5.51e-06	118663	Positive	protein_coding
ENSG00000258634	cg23574748	RP4-773N10.4	chr1	-2.34817	0.354759	2.82e-06	5.69e-06	-587744	Positive	antisense
ENSG00000224986	cg21084142	PPP1R8P1	chr1	-0.158069	0.024544	2.84e-06	5.73e-06	147248	Negative	processed_pseudogene
ENSG00000158716	cg17239103	DUSP23	chr1	-1.26227	0.180496	2.87e-06	5.78e-06	-119352	Negative	protein_coding
ENSG00000117122	cg00075019	MFAP2	chr1	-6.76981	0.883216	2.91e-06	5.86e-06	-737233	Positive	protein_coding
ENSG00000198198	cg04400540	SZT2	chr1	13.6651	2.0339	3.02e-06	6.07e-06	-584688	Negative	protein_coding
ENSG00000117266	cg26866142	CDK18	chr1	-54.2808	6.90259	3.08e-06	6.18e-06	-305955	Negative	protein_coding
ENSG00000116670	cg24635257	MAD2L2	chr1	1.50054	0.220251	3.25e-06	6.51e-06	492410	Positive	protein_coding
ENSG00000157077	cg19776520	ZFYVE9	chr1	24.1029	3.3549	3.29e-06	6.59e-06	-262081	Negative	protein_coding
ENSG00000142684	cg24637425	ZNF593	chr1	-1.07858	0.121618	3.37e-06	6.74e-06	517575	Negative	protein_coding
ENSG00000116857	cg18019070	TMEM9	chr1	14.4792	2.10719	3.51e-06	7.01e-06	-238564	Positive	protein_coding
ENSG00000232596	cg27055894	RP1-37J18.2	chr1	-1.38675	0.193388	3.54e-06	7.06e-06	897125	Negative	lincRNA
ENSG00000271200	cg17414318	RP11-430G17.3	chr1	0.283078	0.0447824	3.73e-06	7.43e-06	-695410	Positive	lincRNA
ENSG00000092621	cg03373466	PHGDH	chr1	10.369	1.48165	3.76e-06	7.49e-06	-63188	Positive	protein_coding
ENSG00000116161	cg15340874	CACYBP	chr1	15.6852	2.19886	3.83e-06	7.62e-06	-1322	Negative	protein_coding
ENSG00000172380	cg20611882	GNG12	chr1	-4.77474	0.738945	3.92e-06	7.79e-06	529551	Negative	protein_coding
ENSG00000177000	cg23687103	MTHFR	chr1	-14.3785	2.1598	3.94e-06	7.83e-06	234122	Negative	protein_coding
ENSG00000230021	cg19816994	RP5-857K21.4	chr1	0.797124	0.104527	3.96e-06	7.87e-06	681985	Positive	lincRNA
ENSG00000198835	cg13295432	GJC2	chr1	-0.571315	0.0878246	4.06e-06	8.06e-06	44325	Negative	protein_coding
ENSG00000237491	cg00702126	RP11-206L10.9	chr1	2.42149	0.364309	4.07e-06	8.08e-06	-655666	Negative	lincRNA
ENSG00000134686	cg24236085	PHC2	chr1	61.7005	9.33082	4.13e-06	8.2e-06	842226	Positive	protein_coding
ENSG00000242193	cg04958082	RP11-568K15.1	chr1	2.63861	0.410351	4.25e-06	8.43e-06	792569	Positive	unitary_pseudogene
ENSG00000117625	cg11225435	RCOR3	chr1	35.1386	5.30137	4.58e-06	9.05e-06	-417296	Positive	protein_coding
ENSG00000116954	cg16896125	RRAGC	chr1	-9.79987	1.28786	4.82e-06	9.5e-06	168503	Positive	protein_coding
ENSG00000198892	cg13134514	SHISA4	chr1	4.18003	0.62191	4.9e-06	9.65e-06	-922206	Negative	protein_coding
ENSG00000143514	cg01022171	TP53BP2	chr1	-26.8285	4.36698	5e-06	9.84e-06	65512	Negative	protein_coding
ENSG00000076356	cg17221524	PLXNA2	chr1	-15.8159	2.4584	5.23e-06	1.03e-05	105825	Positive	protein_coding
ENSG00000234678	cg20771670	RP11-465N4.4	chr1	-0.741732	0.0957465	5.28e-06	1.04e-05	-526806	Negative	antisense
ENSG00000185090	cg03636215	MANEAL	chr1	4.48467	0.70386	5.47e-06	1.07e-05	-253127	Positive	protein_coding
ENSG00000274423	cg21284400	RP11-544O24.2	chr1	-2.24593	0.310376	5.62e-06	1.1e-05	-664044	Negative	unprocessed_pseudogene
ENSG00000162630	cg21815704	B3GALT2	chr1	2.75612	0.45301	5.94e-06	1.16e-05	-72926	Positive	protein_coding
ENSG00000162620	cg21446242	LRRIQ3	chr1	-1.72706	0.277663	6.61e-06	1.29e-05	172128	Negative	protein_coding
ENSG00000178585	cg02461388	CTNNBIP1	chr1	-39.6277	5.03514	6.71e-06	1.31e-05	582610	Negative	protein_coding
ENSG00000154222	cg05553634	CC2D1B	chr1	-3.54913	0.569246	7.23e-06	1.4e-05	496949	Negative	protein_coding
ENSG00000142784	cg03115835	WDTC1	chr1	-147.135	22.1777	7.4e-06	1.44e-05	802277	Negative	protein_coding
ENSG00000121940	cg05651418	CLCC1	chr1	9.24422	1.40297	7.42e-06	1.44e-05	496774	Positive	protein_coding
ENSG00000189266	cg15729771	PNRC2	chr1	40.4048	6.13007	7.59e-06	1.47e-05	-788286	Positive	protein_coding
ENSG00000177674	cg17944110	AGTRAP	chr1	2.42528	0.370685	7.81e-06	1.51e-05	939484	Negative	protein_coding
ENSG00000162496	cg13868520	DHRS3	chr1	6.28396	0.881508	8.36e-06	1.62e-05	-488761	Positive	protein_coding
ENSG00000162873	cg08241939	KLHDC8A	chr1	17.4446	2.51086	8.58e-06	1.66e-05	-604377	Positive	protein_coding
ENSG00000226849	cg05390356	RP4-635E18.7	chr1	-0.185846	0.0285177	8.64e-06	1.67e-05	850546	Negative	antisense
ENSG00000240731	cg05597180	RP5-890O3.9	chr1	0.496321	0.0752078	8.68e-06	1.67e-05	727374	Positive	sense_intronic
ENSG00000155366	cg26330135	RHOC	chr1	62.0627	8.40765	9.43e-06	1.81e-05	-711781	Negative	protein_coding
ENSG00000132694	cg19891271	ARHGEF11	chr1	-35.1226	5.38983	9.69e-06	1.86e-05	-913852	Positive	protein_coding
ENSG00000162695	cg04743063	SLC30A7	chr1	-9.1017	1.43531	9.8e-06	1.88e-05	630098	Negative	protein_coding
ENSG00000282608	cg08162783	ADORA3	chr1	-1.41292	0.187522	1.04e-05	1.99e-05	421283	Negative	protein_coding
ENSG00000248485	cg15026376	PCP4L1	chr1	-15.8301	2.42934	1.06e-05	2.03e-05	-9577	Negative	protein_coding
ENSG00000160752	cg10445911	FDPS	chr1	-8.91867	1.18235	1.07e-05	2.04e-05	309302	Positive	protein_coding
ENSG00000235501	cg03053290	RP4-639F20.1	chr1	-0.683872	0.105927	1.12e-05	2.14e-05	-305461	Positive	antisense
ENSG00000185420	cg02951974	SMYD3	chr1	-0.723997	0.113537	1.13e-05	2.15e-05	947312	Negative	protein_coding
ENSG00000198799	cg23821082	LRIG2	chr1	10.1881	1.51293	1.17e-05	2.23e-05	677193	Positive	protein_coding
ENSG00000197959	cg26839871	DNM3	chr1	-28.238	4.54485	1.22e-05	2.32e-05	-661	Negative	protein_coding
ENSG00000035687	cg13318537	ADSS	chr1	11.5273	1.83092	1.3e-05	2.46e-05	426489	Positive	protein_coding
ENSG00000162522	cg09036220	KIAA1522	chr1	-3.67061	0.51911	1.3e-05	2.46e-05	90713	Negative	protein_coding
ENSG00000121486	cg14172633	TRMT1L	chr1	-10.5454	1.75663	1.35e-05	2.55e-05	616324	Positive	protein_coding
ENSG00000187800	cg24867618	PEAR1	chr1	-0.752965	0.114205	1.36e-05	2.57e-05	19912	Negative	protein_coding
ENSG00000077152	cg01765403	UBE2T	chr1	-0.40222	0.0649203	1.41e-05	2.66e-05	-442840	Negative	protein_coding
ENSG00000143384	cg20811730	MCL1	chr1	-29.329	4.09829	1.44e-05	2.72e-05	-253098	Negative	protein_coding
ENSG00000092850	cg21418854	TEKT2	chr1	-0.278282	0.0417448	1.51e-05	2.84e-05	-222086	Negative	protein_coding
ENSG00000203761	cg13096820	MSTO2P	chr1	0.901296	0.142056	1.52e-05	2.86e-05	663708	Positive	unprocessed_pseudogene
ENSG00000092853	cg09213975	CLSPN	chr1	-15.6723	2.30403	1.58e-05	2.97e-05	394183	Negative	protein_coding
ENSG00000215861	cg07090989	WI2-1896O14.1	chr1	11.6754	1.87847	1.61e-05	3.02e-05	1070894	Positive	unprocessed_pseudogene
ENSG00000116962	cg07102302	NID1	chr1	-2.64095	0.407741	1.65e-05	3.09e-05	166638	Positive	protein_coding
ENSG00000272084	cg27647503	RP5-1126H10.2	chr1	-0.538499	0.0852299	1.73e-05	3.24e-05	396648	Negative	3prime_overlapping_ncRNA
ENSG00000088280	cg10708588	ASAP3	chr1	3.23944	0.504954	1.76e-05	3.29e-05	55760	Positive	protein_coding
ENSG00000117533	cg05158566	VAMP4	chr1	-28.7996	4.78618	1.8e-05	3.36e-05	42306	Positive	protein_coding
ENSG00000143850	cg02895591	PLEKHA6	chr1	-27.9725	4.39972	1.91e-05	3.56e-05	325579	Positive	protein_coding
ENSG00000097096	cg21959316	SYDE2	chr1	29.6808	4.9485	1.95e-05	3.63e-05	-582414	Positive	protein_coding
ENSG00000134644	cg12006201	PUM1	chr1	12.7013	2.01071	1.95e-05	3.63e-05	190870	Negative	protein_coding
ENSG00000184774	cg15027815	MGAT4EP	chr1	0.840299	0.125011	1.99e-05	3.7e-05	658210	Positive	transcribed_unitary_pseudogene
ENSG00000232450	cg09796293	RP4-730K3.3	chr1	-0.953231	0.1605	2.04e-05	3.78e-05	-991418	Negative	transcribed_processed_pseudogene
ENSG00000162654	cg01965380	GBP4	chr1	4.7463	0.566834	2.08e-05	3.85e-05	674361	Positive	protein_coding
ENSG00000260920	cg11386025	RP1-228H13.5	chr1	-0.393441	0.0618921	2.14e-05	3.96e-05	-354591	Positive	sense_overlapping
ENSG00000143318	cg10439651	CASQ1	chr1	-11.1106	1.77675	2.22e-05	4.1e-05	-942643	Negative	protein_coding
ENSG00000162753	cg20940459	SLC9C2	chr1	0.888608	0.140296	2.3e-05	4.24e-05	324324	Positive	protein_coding
ENSG00000014914	cg13560904	MTMR11	chr1	-8.80123	1.35968	2.31e-05	4.26e-05	82254	Negative	protein_coding
ENSG00000281406	cg07368518	BLACAT1	chr1	-2.09879	0.325545	2.32e-05	4.28e-05	60810	Negative	lincRNA
ENSG00000134253	cg07560662	TRIM45	chr1	-4.40161	0.709938	2.37e-05	4.37e-05	-540450	Negative	protein_coding
ENSG00000143303	cg12421032	RRNAD1	chr1	6.30377	1.01118	2.37e-05	4.37e-05	-409794	Positive	protein_coding
ENSG00000171385	cg04611284	KCND3	chr1	-16.5958	2.69709	2.58e-05	4.74e-05	-585325	Negative	protein_coding
ENSG00000120334	cg20656951	CENPL	chr1	-0.432918	0.0730816	2.64e-05	4.85e-05	-852718	Negative	protein_coding
ENSG00000244682	cg07786995	FCGR2C	chr1	-2.04938	0.325878	2.95e-05	5.39e-05	-563585	Negative	polymorphic_pseudogene
ENSG00000120341	cg03112680	SEC16B	chr1	3.16997	0.529622	2.96e-05	5.41e-05	170101	Positive	protein_coding
ENSG00000271895	cg20351062	RP4-635E18.8	chr1	-6.93084	1.09165	3e-05	5.48e-05	-776366	Negative	antisense
ENSG00000162517	cg12639796	PEF1	chr1	-9.51178	1.53549	3.11e-05	5.67e-05	383779	Negative	protein_coding
ENSG00000134202	cg15967012	GSTM3	chr1	21.748	3.2586	3.15e-05	5.74e-05	6439	Positive	protein_coding
ENSG00000131697	cg07830135	NPHP4	chr1	-13.0149	2.16269	3.29e-05	5.98e-05	120699	Negative	protein_coding
ENSG00000143353	cg26757053	LYPLAL1	chr1	-7.51484	1.28238	3.66e-05	6.63e-05	190	Negative	protein_coding
ENSG00000243485	cg03161767	MIR1302-2	chr1	-0.68928	0.111287	3.8e-05	6.87e-05	-929273	Positive	lincRNA
ENSG00000234383	cg23093846	CTBP2P8	chr1	-0.811483	0.138021	3.86e-05	6.97e-05	-118062	Negative	processed_pseudogene
ENSG00000163156	cg16005989	SCNM1	chr1	-3.48707	0.567429	3.87e-05	6.99e-05	108975	Negative	protein_coding
ENSG00000119280	cg26003818	C1orf198	chr1	19.449	3.10379	4.01e-05	7.22e-05	501194	Positive	protein_coding
ENSG00000117448	cg00347280	AKR1A1	chr1	-6.26866	1.0407	4.15e-05	7.47e-05	538381	Negative	protein_coding
ENSG00000173641	ch.1.541122F	HSPB7	chr1	5.02317	0.590631	4.18e-05	7.51e-05	-448610	Negative	protein_coding
ENSG00000164011	cg27508416	ZNF691	chr1	-1.79121	0.294237	4.22e-05	7.58e-05	389725	Negative	protein_coding
ENSG00000269896	cg26295592	RP4-740C4.5	chr1	-1.74575	0.263135	4.26e-05	7.65e-05	-733570	Negative	transcribed_processed_pseudogene
ENSG00000184144	cg24606240	CNTN2	chr1	-1.38654	0.218322	4.32e-05	7.75e-05	-708585	Negative	protein_coding
ENSG00000183520	cg21679142	UTP11	chr1	2.48135	0.413731	4.37e-05	7.84e-05	751654	Negative	protein_coding
ENSG00000053371	cg25020286	AKR7A2	chr1	6.81329	1.09242	4.51e-05	8.08e-05	-673512	Negative	protein_coding
ENSG00000054267	cg20551956	ARID4B	chr1	21.5112	3.55471	4.62e-05	8.27e-05	372973	Positive	protein_coding
ENSG00000158828	cg19078903	PINK1	chr1	-50.1576	8.38174	4.76e-05	8.51e-05	-152770	Negative	protein_coding
ENSG00000198929	cg10679152	NOS1AP	chr1	-1.97172	0.329571	4.8e-05	8.58e-05	872639	Negative	protein_coding
ENSG00000183155	cg11386686	RABIF	chr1	-1.34623	0.210397	4.87e-05	8.7e-05	426412	Negative	protein_coding
ENSG00000175087	cg25603198	PDIK1L	chr1	11.4861	1.94495	4.94e-05	8.82e-05	251505	Negative	protein_coding
ENSG00000163125	cg09726469	RPRD2	chr1	25.7599	4.16638	5.05e-05	9.01e-05	-216447	Positive	protein_coding
ENSG00000130772	cg16922167	MED18	chr1	-0.913783	0.151519	5.29e-05	9.41e-05	693767	Negative	protein_coding
ENSG00000000971	cg11336294	CFH	chr1	-7.56434	1.29974	5.6e-05	9.95e-05	-494971	Negative	protein_coding
ENSG00000186283	cg18153213	TOR3A	chr1	-1.47436	0.252369	5.83e-05	0.00010336	193	Positive	protein_coding
ENSG00000085465	cg14414943	OVGP1	chr1	1.44183	0.229757	5.92e-05	0.00010492	-186218	Positive	protein_coding
ENSG00000143178	cg18018245	TBX19	chr1	-0.741009	0.120363	6.06e-05	0.0001073	343580	Negative	protein_coding
ENSG00000153936	cg17600680	HS2ST1	chr1	-38.9941	6.66322	6.47e-05	0.00011433	137	Negative	protein_coding
ENSG00000123684	cg11225435	LPGAT1	chr1	89.2842	15.1758	6.7e-05	0.00011819	-67784	Positive	protein_coding
ENSG00000273274	cg15469507	ZBTB8B	chr1	0.956778	0.154939	7.11e-05	0.00012516	701414	Positive	protein_coding
ENSG00000117069	cg09826056	ST6GALNAC5	chr1	-6.06698	1.03482	7.13e-05	0.00012547	-1178196	Negative	protein_coding
ENSG00000196482	cg25232669	ESRRG	chr1	-20.4547	3.68921	7.23e-05	0.00012716	217607	Negative	protein_coding
ENSG00000117245	cg27312359	KIF17	chr1	-0.941022	0.160647	7.34e-05	0.00012899	32996	Negative	protein_coding
ENSG00000163382	cg21284779	NAXE	chr1	-3.96722	0.655697	7.49e-05	0.00013155	651027	Negative	protein_coding
ENSG00000143776	ch.1.4414893F	CDC42BPA	chr1	-16.5112	2.78751	7.52e-05	0.00013203	-931801	Negative	protein_coding
ENSG00000197147	cg01423147	LRRC8B	chr1	17.3541	3.10811	7.95e-05	0.00013921	532174	Positive	protein_coding
ENSG00000116731	cg21605566	PRDM2	chr1	19.8102	3.59527	8.15e-05	0.00014255	-48856	Positive	protein_coding
ENSG00000272645	cg09020330	GTF2IP20	chr1	2.38253	0.398505	8.15e-05	0.00014255	405439	Positive	transcribed_unprocessed_pseudogene
ENSG00000143801	cg04082353	PSEN2	chr1	1.7077	0.290529	8.27e-05	0.00014455	-858834	Positive	protein_coding
ENSG00000176261	cg21270648	ZBTB8OS	chr1	-1.74117	0.290977	8.63e-05	0.00015051	-955695	Negative	protein_coding
ENSG00000070831	cg20758506	CDC42	chr1	48.8912	8.06427	8.73e-05	0.00015223	-993822	Positive	protein_coding
ENSG00000156097	cg20610274	GPR61	chr1	-1.45008	0.247461	8.77e-05	0.00015288	-663398	Negative	protein_coding
ENSG00000197106	cg13141442	SLC6A17	chr1	22.8759	3.54924	8.84e-05	0.00015405	684210	Positive	protein_coding
ENSG00000187642	cg04121631	PERM1	chr1	2.24263	0.239584	9.37e-05	0.00016293	-35239	Positive	protein_coding
ENSG00000162931	cg01243544	TRIM17	chr1	0.572486	0.0927556	9.46e-05	0.00016442	-679263	Positive	protein_coding
ENSG00000198162	cg11528995	MAN1A2	chr1	-41.3819	7.24635	9.54e-05	0.00016573	699496	Negative	protein_coding
ENSG00000117318	cg12757705	ID3	chr1	14.8493	2.31622	9.57e-05	0.00016622	761386	Negative	protein_coding
ENSG00000169504	cg15414417	CLIC4	chr1	53.9981	8.40159	9.59e-05	0.00016653	722457	Positive	protein_coding
ENSG00000117151	cg10879116	CTBS	chr1	-17.8845	3.06545	9.72e-05	0.00016865	343183	Negative	protein_coding
ENSG00000116586	cg11482320	LAMTOR2	chr1	3.57691	0.619621	9.85e-05	0.00017079	-907394	Positive	protein_coding
ENSG00000273010	cg24160066	RP11-96K19.5	chr1	0.264089	0.043683	0.00010128	0.00017531	-655940	Positive	antisense
ENSG00000215869	cg00775945	RP11-364B6.2	chr1	0.403084	0.0798172	0.00010476	0.00018093	119256	Positive	transcribed_processed_pseudogene
ENSG00000230615	cg15000684	RP5-1198O20.4	chr1	2.37758	0.389147	0.00010679	0.00018427	-644005	Positive	lincRNA
ENSG00000177181	cg26195652	RIMKLA	chr1	-17.8775	2.95148	0.00010901	0.00018802	-919481	Negative	protein_coding
ENSG00000117707	cg16997900	PROX1	chr1	22.5171	4.05382	0.00010905	0.00018807	931543	Negative	protein_coding
ENSG00000135749	cg19507727	PCNX2	chr1	14.9565	2.65039	0.00011183	0.00019255	-32889	Positive	protein_coding
ENSG00000163866	cg27564656	SMIM12	chr1	4.36574	0.763217	0.00011619	0.00019969	845076	Positive	protein_coding
ENSG00000197587	cg05162791	DMBX1	chr1	-0.703726	0.117661	0.00012405	0.00021245	206521	Negative	protein_coding
ENSG00000198570	cg00085790	RD3	chr1	44.1256	7.9081	0.00012798	0.00021893	72236	Negative	protein_coding
ENSG00000143811	cg14971781	PYCR2	chr1	-26.243	4.61843	0.00013105	0.00022397	267175	Positive	protein_coding
ENSG00000116337	cg20827193	AMPD2	chr1	-91.9355	15.5022	0.00013526	0.00023076	189642	Negative	protein_coding
ENSG00000116774	cg22695389	OLFML3	chr1	-0.858494	0.146251	0.00013716	0.0002338	166780	Negative	protein_coding
ENSG00000158769	cg17613028	F11R	chr1	-2.90546	0.492563	0.0001418	0.0002413	-620532	Negative	protein_coding
ENSG00000186715	cg16466254	MST1L	chr1	-1.96335	0.341082	0.00014322	0.00024352	329246	Negative	transcribed_unprocessed_pseudogene
ENSG00000188739	cg25276149	RBM34	chr1	3.19034	0.560697	0.00015968	0.00027037	-757855	Positive	protein_coding
ENSG00000116473	cg21583850	RAP1A	chr1	-14.603	2.51465	0.00016857	0.00028498	-447962	Negative	protein_coding
ENSG00000198912	cg03613050	C1orf174	chr1	1.93493	0.331946	0.00017472	0.00029492	171886	Positive	protein_coding
ENSG00000142657	cg10882692	PGD	chr1	23.4401	4.01965	0.00017645	0.00029767	72261	Positive	protein_coding
ENSG00000155367	cg00502533	PPM1J	chr1	-5.41678	0.96023	0.00017744	0.00029929	246145	Negative	protein_coding
ENSG00000160766	cg03124475	GBAP1	chr1	-1.42385	0.25149	0.00018172	0.00030609	790118	Negative	transcribed_unprocessed_pseudogene
ENSG00000163050	cg04082353	ADCK3	chr1	1.68906	0.304786	0.00018858	0.0003171	-831482	Positive	protein_coding
ENSG00000143771	cg20492807	CNIH4	chr1	-10.1058	1.83016	0.00019055	0.00032019	-573190	Negative	protein_coding
ENSG00000180867	cg16023912	PDIA3P1	chr1	1.12625	0.211909	0.00020445	0.00034251	-730097	Positive	processed_pseudogene
ENSG00000159445	cg05617886	THEM4	chr1	-7.39237	1.32743	0.00020726	0.00034701	-104330	Negative	protein_coding
ENSG00000162670	cg16305082	BRINP3	chr1	0.759017	0.147031	0.00020872	0.00034936	1356034	Positive	protein_coding
ENSG00000162779	cg03732293	AXDND1	chr1	0.789795	0.143582	0.00021353	0.00035714	-232	Positive	protein_coding
ENSG00000260063	cg23590159	RP5-968P14.2	chr1	-0.607023	0.106524	0.00022184	0.00037057	-388728	Negative	antisense
ENSG00000116455	cg09319202	WDR77	chr1	1.85673	0.34096	0.00022389	0.00037393	-475797	Positive	protein_coding
ENSG00000047410	cg08604429	TPR	chr1	30.8213	5.77539	0.00023312	0.00038886	-656868	Positive	protein_coding
ENSG00000116489	cg21583850	CAPZA1	chr1	-13.8271	2.45093	0.00023418	0.00039049	629625	Positive	protein_coding
ENSG00000097046	cg24174988	CDC7	chr1	-12.2424	1.92541	0.00023682	0.00039459	-579254	Negative	protein_coding
ENSG00000178796	cg07252308	RIIAD1	chr1	0.472438	0.0848354	0.00024232	0.00040322	-513688	Positive	protein_coding
ENSG00000215915	cg25769755	ATAD3C	chr1	-4.07619	0.571861	0.00024971	0.00041516	42349	Negative	protein_coding
ENSG00000160691	cg03668076	SHC1	chr1	-7.72836	1.3008	0.00025146	0.00041783	349027	Negative	protein_coding
ENSG00000143248	cg03381721	RGS5	chr1	28.0363	5.27805	0.00025822	0.00042865	-438334	Positive	antisense
ENSG00000142687	cg08378356	KIAA0319L	chr1	38.1816	7.02988	0.00026534	0.00043973	124061	Positive	protein_coding
ENSG00000173218	cg18907787	VANGL1	chr1	2.13572	0.383249	0.00026758	0.00044332	-490352	Positive	protein_coding
ENSG00000164002	cg25768673	EXO5	chr1	1.98013	0.342862	0.00026891	0.0004454	-1001956	Positive	protein_coding
ENSG00000229191	cg18551618	RP11-168O16.1	chr1	-2.79021	0.439492	0.0002692	0.00044579	353789	Negative	antisense
ENSG00000116819	cg18912897	TFAP2E	chr1	-5.12431	0.916282	0.00027291	0.00045181	-867685	Negative	protein_coding
ENSG00000183831	cg23442110	ANKRD45	chr1	1.70673	0.268099	0.00027741	0.000459	28668	Positive	protein_coding
ENSG00000231252	cg16379336	RP11-436K8.1	chr1	-1.13351	0.209418	0.00028057	0.00046384	-891927	Negative	lincRNA
ENSG00000117593	cg07819919	DARS2	chr1	4.17774	0.762218	0.00028483	0.0004707	-334601	Positive	protein_coding
ENSG00000116717	cg14141421	GADD45A	chr1	4.69783	0.719985	0.00028978	0.00047838	-607976	Positive	protein_coding
ENSG00000133065	cg01880484	SLC41A1	chr1	-13.6615	2.3138	0.00030144	0.00049725	246037	Negative	protein_coding
ENSG00000158796	cg21920303	DEDD	chr1	-8.7434	1.56554	0.00031404	0.00051722	-473408	Negative	protein_coding
ENSG00000226476	cg17252666	RP11-776H12.1	chr1	-0.493279	0.0928145	0.00031688	0.0005215	237921	Negative	lincRNA
ENSG00000197323	cg27635069	TRIM33	chr1	-10.6312	1.9986	0.00032186	0.00052936	944970	Negative	protein_coding
ENSG00000127463	cg05048624	EMC1	chr1	-47.58	8.7316	0.00033017	0.00054251	899426	Negative	protein_coding
ENSG00000162849	cg13108049	KIF26B	chr1	-0.688907	0.120667	0.00033693	0.00055316	714745	Negative	protein_coding
ENSG00000265241	cg05598845	RBM8A	chr1	11.06	2.15756	0.00034108	0.0005597	39837	Positive	protein_coding
ENSG00000117410	cg04563783	ATP6V0B	chr1	15.5877	2.83809	0.00034256	0.00056198	22591	Positive	protein_coding
ENSG00000162738	cg18913171	VANGL2	chr1	6.51484	1.18221	0.00035214	0.00057715	444938	Positive	protein_coding
ENSG00000171612	cg09328789	SLC25A33	chr1	8.25172	1.54034	0.00035542	0.00058221	991593	Positive	protein_coding
ENSG00000143322	cg15206621	ABL2	chr1	19.7165	3.64831	0.00035816	0.00058631	1055518	Positive	protein_coding
ENSG00000162616	cg08514053	DNAJB4	chr1	12.8098	2.17732	0.00036598	0.00059861	197035	Positive	protein_coding
ENSG00000183431	cg14374347	SF3A3	chr1	8.91098	1.64846	0.00036789	0.00060134	-264452	Positive	protein_coding
ENSG00000133059	cg23643450	DSTYK	chr1	-9.45057	1.76639	0.00037281	0.0006091	-519057	Negative	protein_coding
ENSG00000162456	cg21402272	KNCN	chr1	-0.245258	0.0433232	0.00037783	0.00061718	-347047	Negative	protein_coding
ENSG00000130940	cg01576340	CASZ1	chr1	-101.854	17.9334	0.00037954	0.00061982	-726003	Negative	protein_coding
ENSG00000224717	cg07368518	RP11-576D8.4	chr1	-0.582314	0.107276	0.00039094	0.00063789	-39766	Negative	lincRNA
ENSG00000177144	cg14784833	NUDT4P1	chr1	1.36583	0.238618	0.00041612	0.00067759	897371	Positive	processed_pseudogene
ENSG00000135801	cg02296583	TAF5L	chr1	3.20365	0.602017	0.00041983	0.00068325	-250699	Positive	protein_coding
ENSG00000219481	cg16272484	NBPF1	chr1	4.84438	0.914112	0.00043321	0.0007038	875880	Positive	protein_coding
ENSG00000272906	cg26295618	RP11-533E19.7	chr1	-0.390507	0.0689372	0.00044313	0.00071899	229735	Negative	lincRNA
ENSG00000160688	cg03425468	FLAD1	chr1	3.07621	0.552302	0.00044842	0.00072695	-211547	Positive	protein_coding
ENSG00000158711	cg14333970	ELK4	chr1	7.7205	1.38692	0.0004646	0.00075187	122819	Negative	protein_coding
ENSG00000225315	cg22131571	RP11-293P20.2	chr1	1.30087	0.221747	0.00050244	0.00081034	262573	Positive	antisense
ENSG00000260464	cg12945470	RP4-561L24.3	chr1	1.13453	0.21491	0.00050485	0.00081408	151453	Positive	lincRNA
ENSG00000152092	cg01131710	ASTN1	chr1	-12.0465	2.29739	0.00050686	0.00081719	493371	Negative	protein_coding
ENSG00000000457	cg16654023	SCYL3	chr1	-2.67242	0.515067	0.00051056	0.00082283	-481347	Negative	protein_coding
ENSG00000116141	cg08334843	MARK1	chr1	13.8863	2.6296	0.00051155	0.00082423	-883440	Positive	protein_coding
ENSG00000143590	cg14706141	EFNA3	chr1	-2.8686	0.501158	0.00051437	0.00082852	20775	Negative	protein_coding
ENSG00000116604	cg02332577	MEF2D	chr1	94.0896	15.121	0.00051708	0.00083282	672604	Positive	protein_coding
ENSG00000163545	cg16376736	NUAK2	chr1	1.02644	0.181211	0.00053244	0.00085661	-907555	Positive	protein_coding
ENSG00000187554	cg05589251	TLR5	chr1	-0.764393	0.131551	0.00053662	0.0008631	-870773	Negative	protein_coding
ENSG00000117242	cg08061330	PINK1-AS	chr1	1.27719	0.240169	0.00054562	0.00087646	-156797	Positive	antisense
ENSG00000204084	cg11768325	INPP5B	chr1	5.84057	1.1156	0.00055547	0.00089137	-8421	Positive	protein_coding
ENSG00000143226	cg09846895	FCGR2A	chr1	-3.64134	0.555172	0.00056035	0.00089849	32482	Negative	protein_coding
ENSG00000168765	cg22158073	GSTM4	chr1	3.63094	0.681973	0.00057069	0.00091439	-381859	Positive	protein_coding
ENSG00000162745	cg10203578	OLFML2B	chr1	-0.79576	0.136175	0.00058036	0.00092937	55313	Negative	protein_coding
ENSG00000215845	cg11578532	TSTD1	chr1	-0.931151	0.161666	0.00058615	0.0009383	706	Negative	protein_coding
ENSG00000183888	cg23481195	C1orf64	chr1	1.00979	0.185262	0.00059109	0.00094594	437067	Positive	protein_coding
ENSG00000174059	cg17221524	CD34	chr1	-3.8756	0.725792	0.00059297	0.00094887	247095	Negative	protein_coding
ENSG00000154429	cg11161882	CCSAP	chr1	-13.0766	2.49271	0.00060285	0.0009638	-914000	Negative	protein_coding
ENSG00000143179	cg10721030	UCK2	chr1	3.65135	0.713683	0.00061427	0.00098116	-106048	Positive	protein_coding
ENSG00000187513	cg04263115	GJA4	chr1	-0.707859	0.124504	0.00061874	0.00098812	-977081	Negative	protein_coding
ENSG00000160741	cg01011918	CRTC2	chr1	-9.26394	1.70152	0.00063096	0.00100654	-906572	Negative	protein_coding
ENSG00000225855	cg07222421	RUSC1-AS1	chr1	-1.29373	0.204301	0.0006576	0.00104667	431994	Negative	antisense
ENSG00000185495	cg04099562	RP11-504P24.3	chr1	-4.87601	0.940226	0.00066041	0.00105085	-439589	Negative	transcribed_unprocessed_pseudogene
ENSG00000152760	cg05707463	TCTEX1D1	chr1	1.29796	0.241925	0.00066765	0.00106161	-376646	Positive	protein_coding
ENSG00000117691	cg26883251	NENF	chr1	-3.89432	0.764845	0.00067727	0.00107573	-562784	Negative	protein_coding
ENSG00000227533	cg09003612	SLC2A1-AS1	chr1	-1.50717	0.263025	0.00074104	0.00117362	-502	Negative	lincRNA
ENSG00000197429	cg26899948	IPP	chr1	-2.63514	0.50536	0.00075457	0.00119376	-6800	Negative	protein_coding
ENSG00000116701	cg22809683	NCF2	chr1	-1.01343	0.179334	0.00077108	0.0012188	-525782	Negative	protein_coding
ENSG00000143858	cg01781649	SYT2	chr1	-48.8027	8.63325	0.00077442	0.00122374	464735	Negative	protein_coding
ENSG00000152078	cg26619317	TMEM56	chr1	10.1858	1.92328	0.00077866	0.0012301	190522	Positive	protein_coding
ENSG00000162433	cg07966661	AK4	chr1	-69.5308	13.2886	0.00078564	0.00124024	642368	Negative	protein_coding
ENSG00000143079	cg13381990	CTTNBP2NL	chr1	4.77154	0.919442	0.00080898	0.00127526	-795502	Positive	protein_coding
ENSG00000278467	cg23982151	RP11-504P24.9	chr1	-1.10692	0.21675	0.00082685	0.00130202	-189663	Negative	lincRNA
ENSG00000074800	cg12749164	ENO1	chr1	-382.096	67.1449	0.00083685	0.00131661	-658135	Negative	protein_coding
ENSG00000117174	cg02487061	ZNHIT6	chr1	3.40116	0.608896	0.00085155	0.00133888	-393850	Positive	protein_coding
ENSG00000230415	cg08387662	RP5-902P8.10	chr1	-0.199137	0.0372891	0.00085699	0.00134623	-132209	Negative	lincRNA
ENSG00000213190	cg26252253	MLLT11	chr1	37.6845	6.94188	0.00086511	0.00135813	49437	Positive	protein_coding
ENSG00000163468	cg19362080	CCT3	chr1	22.7959	4.36432	0.0008729	0.00136988	-981474	Negative	protein_coding
ENSG00000228463	cg09383789	AP006222.2	chr1	-4.24414	0.827788	0.00088237	0.00138424	858120	Negative	lincRNA
ENSG00000235527	cg10641246	HIPK1-AS1	chr1	0.298725	0.057937	0.00089299	0.0014004	-23665	Positive	antisense
ENSG00000204178	cg11240755	TMEM57	chr1	-2.76088	0.477808	0.00089742	0.00140673	-389999	Negative	protein_coding
ENSG00000162852	cg24062139	CNST	chr1	8.67224	1.69125	0.00090817	0.00142345	-66594	Positive	protein_coding
ENSG00000186364	cg06804431	NUDT17	chr1	-2.37844	0.415869	0.00091144	0.00142832	-73204	Negative	protein_coding
ENSG00000162650	cg26434376	ATXN7L2	chr1	-5.48027	1.05076	0.00098111	0.0015327	176556	Positive	protein_coding
ENSG00000281912	cg09266468	LINC01144	chr1	-1.06817	0.202089	0.00099667	0.00155591	528002	Negative	lincRNA
ENSG00000272512	cg24678117	RP11-54O7.17	chr1	-6.34451	0.913466	0.0010279	0.00160367	64948	Negative	lincRNA
ENSG00000143256	cg10751537	PFDN2	chr1	2.59408	0.481949	0.00103541	0.00161482	67512	Positive	protein_coding
ENSG00000253304	cg15599490	TMEM200B	chr1	0.396593	0.0752425	0.00104583	0.00162976	-613641	Positive	protein_coding
ENSG00000116750	cg12336574	UCHL5	chr1	22.7011	4.65282	0.00105826	0.00164811	109423	Negative	protein_coding
ENSG00000116688	cg03303757	MFN2	chr1	-19.3378	3.71065	0.00107367	0.00167092	920093	Negative	protein_coding
ENSG00000135766	cg13169968	EGLN1	chr1	23.107	4.44055	0.00107449	0.00167205	-935699	Positive	protein_coding
ENSG00000197852	cg02564245	FAM212B	chr1	-0.88278	0.170676	0.00109017	0.00169539	-617823	Negative	protein_coding
ENSG00000009307	cg23960652	CSDE1	chr1	-44.7959	8.61813	0.00111013	0.00172416	-701538	Positive	protein_coding
ENSG00000085840	cg04995860	ORC1	chr1	-0.502514	0.0928437	0.00115509	0.00179003	353571	Negative	protein_coding
ENSG00000008118	cg10433625	CAMK1G	chr1	0.576456	0.106551	0.00120284	0.00185976	982617	Positive	protein_coding
ENSG00000142875	cg10879116	PRKACB	chr1	-64.5061	13.0624	0.00121184	0.00187237	-814732	Negative	protein_coding
ENSG00000243364	cg02791625	EFNA4	chr1	-0.429728	0.0791112	0.00123846	0.00191165	523923	Negative	protein_coding
ENSG00000226396	cg24381445	RP5-1056L3.3	chr1	0.634871	0.11819	0.00124778	0.00192518	-501253	Positive	processed_pseudogene
ENSG00000116675	cg14827054	DNAJC6	chr1	-32.2135	6.31691	0.00127775	0.00196969	741822	Negative	protein_coding
ENSG00000236200	cg08959526	KDM4A-AS1	chr1	-3.65924	0.645297	0.00129151	0.00198934	85200	Negative	antisense
ENSG00000173207	cg03425468	CKS1B	chr1	-0.866911	0.164594	0.00129416	0.00199306	-220232	Negative	protein_coding
ENSG00000228288	cg16055091	PCAT6	chr1	-2.82481	0.515067	0.00130304	0.00200603	799707	Positive	antisense
ENSG00000117751	cg25132696	PPP1R8	chr1	8.0081	1.53991	0.00130401	0.00200736	340615	Positive	protein_coding
ENSG00000126106	cg09266468	TMEM53	chr1	-3.27437	0.629275	0.00132889	0.00204422	140670	Negative	protein_coding
ENSG00000160055	cg11840711	TMEM234	chr1	-0.908159	0.176699	0.0013501	0.00207484	436178	Negative	protein_coding
ENSG00000162687	cg16419253	KCNT2	chr1	-0.599687	0.111192	0.00136634	0.00209889	973925	Negative	protein_coding
ENSG00000117305	cg00404049	HMGCL	chr1	-1.90745	0.362444	0.00137025	0.00210471	177123	Negative	protein_coding
ENSG00000236155	cg19633962	RP11-231P20.2	chr1	0.540953	0.102442	0.00138864	0.00213166	174214	Positive	transcribed_unprocessed_pseudogene
ENSG00000132688	cg05888917	NES	chr1	37.0082	5.39802	0.00139351	0.00213876	-11806	Positive	protein_coding
ENSG00000134222	cg01663277	PSRC1	chr1	-21.3661	3.89106	0.00143256	0.00219638	-575461	Negative	protein_coding
ENSG00000196154	cg06678477	S100A4	chr1	1.48228	0.271711	0.00146695	0.00224755	-244407	Positive	protein_coding
ENSG00000187147	cg19286674	RNF220	chr1	-11.3159	2.17625	0.00152562	0.00233418	-581552	Negative	protein_coding
ENSG00000143344	cg09013655	RGL1	chr1	-21.6648	4.13703	0.00154721	0.00236536	-399844	Negative	protein_coding
ENSG00000143603	cg13572380	KCNN3	chr1	-1.30762	0.233012	0.00155928	0.00238319	33919	Negative	protein_coding
ENSG00000137944	cg02473334	KYAT3	chr1	4.15331	0.846451	0.00156319	0.00238834	427656	Positive	protein_coding
ENSG00000274386	cg11256186	RP5-994D16.11	chr1	0.958189	0.175941	0.00156655	0.00239326	961853	Positive	protein_coding
ENSG00000270084	cg06956500	GAS5-AS1	chr1	0.169946	0.0345378	0.00171176	0.00260604	147017	Positive	antisense
ENSG00000225492	cg07998124	GBP1P1	chr1	-0.554022	0.100252	0.00177851	0.00270275	-386921	Negative	transcribed_unprocessed_pseudogene
ENSG00000049239	cg09122657	H6PD	chr1	-5.38097	1.06704	0.00183414	0.00278224	-79	Negative	protein_coding
ENSG00000162643	cg10879116	WDR63	chr1	-0.544188	0.109984	0.0018351	0.00278321	106353	Negative	protein_coding
ENSG00000177888	cg13246670	ZBTB41	chr1	14.6951	3.09533	0.00186631	0.00282835	532878	Negative	protein_coding
ENSG00000270149	cg01371154	RP11-544M22.13	chr1	-0.356777	0.0668582	0.00190394	0.00288115	768770	Negative	protein_coding
ENSG00000018625	cg01448881	ATP1A2	chr1	-106.741	19.8887	0.00192083	0.00290447	1286	Positive	protein_coding
ENSG00000118733	cg18374697	OLFM3	chr1	-8.13551	1.71146	0.00192876	0.0029157	-776655	Negative	protein_coding
ENSG00000079739	cg10748669	PGM1	chr1	6.18363	1.2768	0.0019812	0.00299189	514362	Positive	protein_coding
ENSG00000276600	cg20998511	RAB7B	chr1	-1.85758	0.332288	0.00201763	0.00304324	822028	Negative	protein_coding
ENSG00000185220	cg01438286	PGBD2	chr1	-0.964302	0.205647	0.00206985	0.00311932	356	Negative	protein_coding
ENSG00000143393	cg16916264	PI4KB	chr1	-9.32186	1.81533	0.00210414	0.00316856	-732030	Negative	protein_coding
ENSG00000276509	cg03001828	CH17-353B19.1	chr1	0.299509	0.0620328	0.00213184	0.0032089	198626	Positive	lincRNA
ENSG00000176393	cg08115330	RNPEP	chr1	2.23326	0.452079	0.00214433	0.00322687	986247	Positive	protein_coding
ENSG00000158882	cg00549451	TOMM40L	chr1	-6.12042	1.24797	0.00215491	0.00324084	-214029	Negative	protein_coding
ENSG00000198700	cg07041185	IPO9	chr1	-15.7349	3.09115	0.0021655	0.00325537	265725	Negative	protein_coding
ENSG00000143578	cg12640942	CREB3L4	chr1	1.85238	0.350333	0.00219203	0.003293	-226623	Positive	protein_coding
ENSG00000132854	cg18129198	KANK4	chr1	-3.75012	0.654208	0.00226208	0.00339476	547857	Negative	protein_coding
ENSG00000180287	cg12474159	PLD5	chr1	-0.923173	0.183703	0.00235455	0.00352631	-658736	Negative	protein_coding
ENSG00000143382	cg17336496	ADAMTSL4	chr1	3.89991	0.629975	0.00236975	0.00354695	649877	Negative	protein_coding
ENSG00000198756	cg26564172	COLGALT2	chr1	-8.12373	1.51107	0.00244096	0.00365012	-170651	Negative	protein_coding
ENSG00000178922	cg01642049	HYI	chr1	-5.54485	1.03862	0.00246501	0.00368358	-683792	Negative	protein_coding
ENSG00000142937	cg04362757	RPS8	chr1	-21.5264	4.31831	0.0024665	0.0036855	43776	Negative	protein_coding
ENSG00000117682	cg22167396	DHDDS	chr1	9.09683	1.80545	0.00248787	0.00371585	-195781	Negative	protein_coding
ENSG00000183780	cg07187135	SLC35F3	chr1	0.865576	0.170729	0.00249208	0.0037215	-1224140	Positive	protein_coding
ENSG00000213281	cg15740508	NRAS	chr1	2.61821	0.544935	0.00252947	0.00377412	-8531	Positive	protein_coding
ENSG00000131788	cg19930199	PIAS3	chr1	-6.16095	1.35943	0.00254032	0.00378871	109332	Negative	protein_coding
ENSG00000117115	cg10233913	PADI2	chr1	-24.4088	4.97917	0.00261854	0.00390173	52906	Negative	protein_coding
ENSG00000058668	cg07606636	ATP2B4	chr1	105.235	20.7047	0.00264967	0.00394443	-863958	Positive	protein_coding
ENSG00000142677	cg03855983	IL22RA1	chr1	0.723903	0.131551	0.00265262	0.00394849	737897	Positive	protein_coding
ENSG00000198626	cg19655142	RYR2	chr1	7.20215	1.51554	0.00267312	0.00397698	-631331	Negative	protein_coding
ENSG00000223764	cg23795938	RP11-54O7.3	chr1	-4.8037	0.699531	0.00268414	0.0039927	509176	Negative	lincRNA
ENSG00000198216	cg01190965	CACNA1E	chr1	2.77667	0.575001	0.00271962	0.00404308	-1471624	Positive	protein_coding
ENSG00000264207	cg08858295	RP11-196G18.23	chr1	-0.765041	0.1597	0.00273261	0.00406078	-146033	Negative	antisense
ENSG00000185630	cg23844705	PBX1	chr1	16.199	3.39881	0.0027574	0.00409603	-49014	Positive	protein_coding
ENSG00000143194	cg06665322	MAEL	chr1	-2.22913	0.470834	0.00280428	0.00416225	-114546	Negative	protein_coding
ENSG00000143155	cg20540042	TIPRL	chr1	-4.94369	1.01099	0.00281196	0.00417214	958207	Negative	protein_coding
ENSG00000116212	cg11841758	LRRC42	chr1	-3.69186	0.679464	0.0028796	0.00426613	707399	Negative	protein_coding
ENSG00000213625	cg07342512	LEPROT	chr1	-4.74856	0.990881	0.00295414	0.00437028	268	Positive	protein_coding
ENSG00000142864	cg15991072	SERBP1	chr1	43.3922	9.33648	0.00296207	0.00438165	-100089	Positive	protein_coding
ENSG00000154511	cg16316947	FAM69A	chr1	5.90042	1.24356	0.00298335	0.00441164	347858	Positive	protein_coding
ENSG00000227621	cg25622749	PHBP11	chr1	-0.17919	0.0378061	0.00300622	0.00444359	473674	Negative	processed_pseudogene
ENSG00000134201	cg25210835	GSTM5	chr1	-8.34219	1.40799	0.00301871	0.00446167	-426	Negative	protein_coding
ENSG00000159348	cg07098528	CYB5R1	chr1	7.06913	1.44621	0.00304388	0.00449698	310947	Positive	protein_coding
ENSG00000084652	cg04680037	TXLNA	chr1	-10.2811	1.9694	0.00306978	0.00453334	-785207	Positive	protein_coding
ENSG00000184313	cg16397644	MROH7	chr1	5.4436	1.03637	0.0030952	0.00456896	-56895	Positive	protein_coding
ENSG00000160051	cg20457193	IQCC	chr1	0.689078	0.136628	0.0031118	0.00459154	26082	Positive	protein_coding
ENSG00000265972	cg17452625	TXNIP	chr1	5.83492	1.2851	0.00312469	0.00460863	-220655	Positive	protein_coding
ENSG00000237424	cg12603243	FOXD2-AS1	chr1	2.00155	0.404908	0.00314709	0.00463933	-962028	Positive	antisense
ENSG00000238142	cg06662252	RP11-108M9.4	chr1	0.976908	0.195494	0.00315491	0.00465008	-366915	Positive	lincRNA
ENSG00000196890	cg07166216	HIST3H2BB	chr1	0.899416	0.162737	0.00321774	0.00473712	348654	Positive	protein_coding
ENSG00000066557	cg10721728	LRRC40	chr1	-5.42875	1.18184	0.0032708	0.00481403	-196754	Negative	protein_coding
ENSG00000122218	cg01489523	COPA	chr1	22.0055	4.48014	0.00331213	0.00487282	-430631	Positive	protein_coding
ENSG00000090104	cg14662181	RGS1	chr1	-38.4133	6.7573	0.00332884	0.00489658	136044	Negative	protein_coding
ENSG00000077549	cg11947149	CAPZB	chr1	-11.9279	2.34683	0.00334447	0.00491833	-304691	Negative	protein_coding
ENSG00000239887	cg11754482	C1orf226	chr1	5.3925	1.07677	0.00344781	0.00506057	-697918	Negative	protein_coding
ENSG00000157873	cg06082439	TNFRSF14	chr1	-9.80056	1.24822	0.00354837	0.00520164	625156	Negative	protein_coding
ENSG00000023909	cg10319137	GCLM	chr1	-10.511	2.20037	0.00354917	0.00520239	-539171	Negative	protein_coding
ENSG00000279838	cg22883077	RP4-635A23.6	chr1	0.297899	0.0629854	0.00356267	0.00522087	25130	Positive	TEC
ENSG00000001460	cg01840215	STPG1	chr1	-14.1211	2.85849	0.00364411	0.00533132	-376850	Negative	protein_coding
ENSG00000134690	cg03946269	CDCA8	chr1	-0.29243	0.0618818	0.00379068	0.00553195	-101337	Negative	protein_coding
ENSG00000272491	cg20465832	RP5-1024N4.4	chr1	-0.295663	0.0571452	0.00383833	0.00559823	-25243	Negative	antisense
ENSG00000143845	cg20325269	ETNK2	chr1	6.46542	1.35642	0.00389644	0.00567921	280134	Positive	protein_coding
ENSG00000125944	cg11987090	HNRNPR	chr1	23.1897	4.82949	0.00395417	0.00575952	-851822	Negative	protein_coding
ENSG00000116205	cg22162435	TCEANC2	chr1	4.00682	0.82256	0.00400637	0.00583218	-946025	Positive	protein_coding
ENSG00000143621	cg22112564	ILF2	chr1	-4.92435	0.979084	0.00404573	0.00588753	284945	Negative	protein_coding
ENSG00000186205	cg05365199	MTARC1	chr1	-3.31772	0.722001	0.00412512	0.00599859	-644632	Positive	protein_coding
ENSG00000228526	cg06758477	MIR34A	chr1	-1.48839	0.263192	0.00416826	0.00605631	1032702	Negative	lincRNA
ENSG00000270136	cg26204978	MINOS1-NBL1	chr1	-1.49348	0.259794	0.00428821	0.00622339	-816359	Negative	protein_coding
ENSG00000142961	cg15458577	MOB3C	chr1	2.05001	0.430505	0.00429491	0.0062326	-125389	Positive	protein_coding
ENSG00000162627	cg22235012	SNX7	chr1	-1.44601	0.29345	0.00433584	0.00629095	740822	Negative	protein_coding
ENSG00000168528	cg06087962	SERINC2	chr1	-0.487889	0.0841629	0.00440893	0.00639279	-795969	Positive	protein_coding
ENSG00000173406	cg10278986	DAB1	chr1	-3.98907	0.827671	0.00455189	0.00658756	-484761	Negative	protein_coding
ENSG00000072694	cg09846895	FCGR2B	chr1	-2.33079	0.389641	0.00457824	0.00662462	190199	Negative	protein_coding
ENSG00000060718	cg17340590	COL11A1	chr1	17.4938	3.9847	0.00462876	0.00669165	641197	Positive	protein_coding
ENSG00000230461	cg08634987	PROX1-AS1	chr1	3.47268	0.749486	0.00493402	0.00711016	-556093	Positive	processed_transcript
ENSG00000177272	cg01854652	KCNA3	chr1	0.386273	0.082456	0.00496514	0.00715266	-462398	Positive	protein_coding
ENSG00000116922	cg16341373	C1orf109	chr1	1.28781	0.278146	0.00498858	0.00718465	10720	Positive	protein_coding
ENSG00000168679	cg22615948	SLC16A4	chr1	2.09998	0.400679	0.00522197	0.0075048	946525	Positive	protein_coding
ENSG00000197780	cg20827193	TAF13	chr1	8.04185	1.48503	0.00523192	0.00751725	363976	Negative	protein_coding
ENSG00000163374	cg22353551	YY1AP1	chr1	10.2105	2.09879	0.00527923	0.00758127	728604	Positive	protein_coding
ENSG00000116704	cg02565946	SLC35D1	chr1	9.72829	2.12677	0.00531913	0.00763257	540247	Positive	protein_coding
ENSG00000132681	cg08548748	ATP1A4	chr1	2.18158	0.368008	0.00545799	0.0078216	370999	Positive	protein_coding
ENSG00000157184	cg23224303	CPT2	chr1	3.99949	0.853979	0.00546002	0.00782387	-694103	Positive	protein_coding
ENSG00000134242	cg13962325	PTPN22	chr1	-1.55183	0.264337	0.00549818	0.0078747	813158	Negative	protein_coding
ENSG00000142583	cg09146155	SLC2A5	chr1	-2.48162	0.449449	0.00552004	0.0079015	851182	Positive	protein_coding
ENSG00000143149	cg24459396	ALDH9A1	chr1	-21.3139	4.54308	0.00551976	0.0079015	-237301	Negative	protein_coding
ENSG00000188295	cg03408556	ZNF669	chr1	1.32685	0.293351	0.005581	0.00798161	11445	Negative	protein_coding
ENSG00000116741	cg25619551	RGS2	chr1	-27.7008	6.35188	0.00564812	0.00807432	-931873	Negative	protein_coding
ENSG00000143369	cg20348081	ECM1	chr1	1.39549	0.274014	0.00568732	0.00812738	247657	Negative	protein_coding
ENSG00000137970	cg24682415	RPL7P9	chr1	-0.596988	0.141959	0.00576526	0.00823442	466273	Negative	processed_pseudogene
ENSG00000117600	cg16174952	PLPPR4	chr1	5.22679	1.16865	0.00581987	0.00830972	-706539	Positive	protein_coding
ENSG00000163563	cg27082765	MNDA	chr1	-4.89058	1.04843	0.00586115	0.00836593	11737	Negative	protein_coding
ENSG00000275140	cg17149103	CH17-478G19.2	chr1	-2.41603	0.554921	0.00602826	0.0085905	-455276	Negative	unprocessed_pseudogene
ENSG00000218283	cg10211079	MORF4L1P1	chr1	-1.98608	0.438827	0.00621891	0.00885141	840744	Negative	processed_pseudogene
ENSG00000171812	cg08471205	COL8A2	chr1	-1.34021	0.263728	0.006261	0.00890845	39176	Negative	protein_coding
ENSG00000117385	cg27034720	P3H1	chr1	-4.01081	0.86963	0.00631992	0.00898719	-290075	Negative	protein_coding
ENSG00000163874	cg14784113	ZC3H12A	chr1	-0.920763	0.142871	0.00640724	0.00910179	-40395	Negative	protein_coding
ENSG00000060642	cg01681396	PIGV	chr1	1.35854	0.289483	0.00641421	0.00911021	-562159	Positive	protein_coding
ENSG00000084623	cg03444100	EIF3I	chr1	-11.107	2.31275	0.00649223	0.00921426	4306	Negative	protein_coding
ENSG00000123080	cg15574895	CDKN2C	chr1	1.48671	0.323067	0.00653184	0.0092668	292815	Positive	protein_coding
ENSG00000171943	cg09871471	SRGAP2C	chr1	3.00602	0.917944	0.00656624	0.00931034	-334292	Positive	protein_coding
ENSG00000117477	cg23662453	CCDC181	chr1	11.8985	2.66518	0.006625	0.00938533	679647	Positive	protein_coding
ENSG00000143641	cg03525122	GALNT2	chr1	9.4994	2.03033	0.00705286	0.00996495	-10046	Positive	protein_coding
ENSG00000174151	cg23405243	CYB561D1	chr1	3.78177	0.812575	0.00726403	0.0102419	-962301	Positive	protein_coding
ENSG00000188672	cg21826606	RHCE	chr1	0.23153	0.0487166	0.00729745	0.0102841	-95685	Positive	protein_coding
ENSG00000081237	cg19976315	PTPRC	chr1	1.73847	0.340484	0.00734069	0.0103442	726088	Positive	protein_coding
ENSG00000142945	cg21991229	KIF2C	chr1	-0.672759	0.14673	0.00734171	0.0103446	-35641	Negative	protein_coding
ENSG00000142892	cg08514053	PIGK	chr1	6.06571	1.3249	0.00735499	0.010361	693151	Positive	protein_coding
ENSG00000162434	cg17336761	JAK1	chr1	-8.61327	1.94355	0.0075311	0.0105947	46360	Negative	protein_coding
ENSG00000123689	cg20869305	G0S2	chr1	2.14309	0.388163	0.007535	0.0105993	-152559	Positive	protein_coding
ENSG00000159189	cg11847808	C1QC	chr1	-3.30487	0.650091	0.00764707	0.0107475	80515	Negative	protein_coding
ENSG00000135842	cg18032827	FAM129A	chr1	-2.81992	0.536791	0.00779125	0.0109405	467451	Positive	protein_coding
ENSG00000143375	cg15900387	CGN	chr1	-5.55148	1.08596	0.00783392	0.010996	744081	Negative	protein_coding
ENSG00000143119	cg12969813	CD53	chr1	-3.28106	0.588415	0.00811082	0.0113647	143660	Negative	protein_coding
ENSG00000235263	cg10882692	RP13-392I16.1	chr1	2.74563	0.576427	0.00841476	0.0117681	825239	Negative	lincRNA
ENSG00000228044	cg03001875	RP4-781K5.4	chr1	0.459257	0.0991635	0.00845777	0.0118245	167201	Positive	lincRNA
ENSG00000135824	cg07680530	RGS8	chr1	-18.8411	4.21102	0.00846834	0.0118345	-340435	Negative	protein_coding
ENSG00000137992	cg03050965	DBT	chr1	2.50036	0.551184	0.00849091	0.0118632	1052762	Positive	protein_coding
ENSG00000272195	cg19716264	RP11-156E8.1	chr1	0.385422	0.0854288	0.00861415	0.0120249	49498	Positive	antisense
ENSG00000143570	cg13947272	SLC39A1	chr1	-3.4849	0.73662	0.00870755	0.0121466	978004	Negative	protein_coding
ENSG00000116903	cg06523340	EXOC8	chr1	9.15464	1.7689	0.00879715	0.0122648	-91604	Negative	protein_coding
ENSG00000228175	cg16695835	GEMIN8P4	chr1	0.683195	0.154517	0.00886569	0.0123545	1734	Positive	processed_pseudogene
ENSG00000143147	cg25099403	GPR161	chr1	5.29245	1.19703	0.00888955	0.0123848	-858868	Positive	protein_coding
ENSG00000228172	cg03694649	RP1-317E23.3	chr1	-0.424453	0.086286	0.00891217	0.0124123	740258	Negative	antisense
ENSG00000162782	cg05314329	TDRD5	chr1	-0.174728	0.0389294	0.00897279	0.0124928	-942762	Negative	protein_coding
ENSG00000280114	cg13770924	RP5-875O13.7	chr1	1.48718	0.315417	0.00902364	0.0125596	402366	Positive	unprocessed_pseudogene
ENSG00000117394	cg00045275	SLC2A1	chr1	258.339	50.8601	0.00909739	0.0126533	-1403	Positive	protein_coding
ENSG00000137996	cg11820522	RTCA	chr1	-4.00816	0.901456	0.00915795	0.0127315	287	Positive	protein_coding
ENSG00000117505	cg15394350	DR1	chr1	-17.1911	3.85951	0.00917834	0.0127568	861207	Negative	protein_coding
ENSG00000078900	cg12133393	TP73	chr1	0.229941	0.0443423	0.00934909	0.0129879	-247615	Positive	protein_coding
ENSG00000117461	cg03146154	PIK3R3	chr1	17.3223	3.82921	0.00939166	0.0130429	-289075	Positive	protein_coding
ENSG00000196660	cg18217102	SLC30A10	chr1	0.45798	0.103522	0.00951905	0.0132115	-807802	Positive	protein_coding
ENSG00000143158	cg17423711	MPC2	chr1	6.51533	1.36984	0.0097515	0.0135149	-695734	Positive	protein_coding
ENSG00000058799	cg05979549	YIPF1	chr1	4.37707	0.903888	0.00989393	0.0137015	311830	Positive	protein_coding
ENSG00000143842	cg09671119	SOX13	chr1	-2.75068	0.591576	0.0101544	0.0140435	776012	Negative	protein_coding
ENSG00000084628	cg17395458	NKAIN1	chr1	1.48419	0.303784	0.0103071	0.0142434	675801	Negative	protein_coding
ENSG00000260879	cg25404394	RP11-483I13.5	chr1	-0.641615	0.143896	0.0104382	0.0144177	-359991	Negative	antisense
ENSG00000117650	cg26187123	NEK2	chr1	-0.385833	0.0878961	0.0105823	0.0146042	-335018	Negative	protein_coding
ENSG00000225077	cg08429159	LINC00337	chr1	0.623443	0.123726	0.010826	0.0149275	-368517	Positive	lincRNA
ENSG00000143224	cg04603146	PPOX	chr1	-11.5598	2.55934	0.0108389	0.0149418	-234085	Negative	protein_coding
ENSG00000134697	cg21679142	GNL2	chr1	4.04784	0.783661	0.0108859	0.0150007	-309212	Positive	protein_coding
ENSG00000174827	cg12769891	PDZK1	chr1	-0.287112	0.0694349	0.0108903	0.0150044	325999	Negative	protein_coding
ENSG00000233184	cg24646972	RP11-421L21.3	chr1	-0.986672	0.220752	0.0109181	0.0150404	98377	Negative	antisense
ENSG00000163463	cg07737038	KRTCAP2	chr1	-2.17497	0.473702	0.0109199	0.0150417	955464	Negative	protein_coding
ENSG00000085831	cg19104318	TTC39A	chr1	-6.25811	1.2892	0.0111869	0.0153854	29760	Negative	protein_coding
ENSG00000259865	cg03466998	RP11-488L18.10	chr1	1.29902	0.291865	0.0115163	0.0158137	229491	Positive	lincRNA
ENSG00000116194	cg10785394	ANGPTL1	chr1	2.64494	0.600905	0.0117194	0.0160674	174336	Positive	protein_coding
ENSG00000122484	cg05422343	RPAP2	chr1	40.3264	9.35619	0.01179	0.0161544	412810	Positive	protein_coding
ENSG00000143171	cg26823212	RXRG	chr1	-8.52584	1.9123	0.0118405	0.0162183	507148	Positive	protein_coding
ENSG00000162783	cg00093888	IER5	chr1	1.41737	0.264715	0.0119777	0.0163973	812325	Positive	protein_coding
ENSG00000173846	cg17278038	PLK3	chr1	1.63338	0.333903	0.012094	0.01655	-186521	Positive	protein_coding
ENSG00000236085	cg01394944	ACTG1P4	chr1	1.96071	0.524098	0.0121101	0.0165708	-503434	Positive	processed_pseudogene
ENSG00000162639	cg13178487	HENMT1	chr1	2.06837	0.475315	0.0122498	0.0167528	314774	Positive	protein_coding
ENSG00000163877	cg07104684	SNIP1	chr1	-3.44361	0.764993	0.0122941	0.0168068	943563	Negative	protein_coding
ENSG00000198837	cg22946974	DENND4B	chr1	-17.5911	3.89205	0.0125353	0.017116	-816008	Negative	protein_coding
ENSG00000134250	cg17592360	NOTCH2	chr1	33.3859	7.92897	0.0129489	0.0176443	-910586	Positive	protein_coding
ENSG00000065978	cg16152117	YBX1	chr1	84.5419	18.612	0.0130819	0.0178146	726391	Positive	protein_coding
ENSG00000050628	cg18275321	PTGER3	chr1	3.0883	0.741977	0.0131636	0.0179217	-497396	Positive	protein_coding
ENSG00000086015	cg09941208	MAST2	chr1	-19.2284	4.22703	0.0132631	0.0180501	944411	Negative	protein_coding
ENSG00000162494	cg19283112	LRRC38	chr1	-1.31701	0.304757	0.0132663	0.018053	274085	Negative	protein_coding
ENSG00000197956	cg21948655	S100A6	chr1	10.1392	1.78899	0.0135128	0.0183742	-657337	Positive	protein_coding
ENSG00000155363	cg23435013	MOV10	chr1	12.8895	2.97409	0.0135564	0.0184293	-30589	Positive	protein_coding
ENSG00000267272	cg12535934	LINC01140	chr1	0.46954	0.111374	0.0138798	0.0188368	317995	Positive	lincRNA
ENSG00000226084	cg20417424	RP4-706A16.3	chr1	0.318339	0.0733574	0.013927	0.0188966	262859	Positive	processed_pseudogene
ENSG00000270035	cg15977292	RP11-338N10.2	chr1	2.38692	0.514953	0.0140707	0.0190797	970095	Positive	lincRNA
ENSG00000010803	cg13784898	SCMH1	chr1	2.76374	0.626917	0.0140753	0.0190845	334553	Positive	protein_coding
ENSG00000116883	cg19379491	RP11-268J15.5	chr1	-13.2977	2.64436	0.0143038	0.0193793	-122580	Positive	antisense
ENSG00000143502	cg19185520	SUSD4	chr1	3.71473	0.860859	0.0144515	0.0195689	-308759	Positive	protein_coding
ENSG00000116983	cg15985196	HPCAL4	chr1	15.5421	3.53001	0.0146005	0.0197616	-818857	Positive	protein_coding
ENSG00000125462	cg05532239	C1orf61	chr1	43.3884	9.58073	0.014733	0.0199302	-64783	Positive	protein_coding
ENSG00000203943	cg23533703	SAMD13	chr1	-0.629849	0.147145	0.0150249	0.0202969	-977817	Negative	protein_coding
ENSG00000177807	cg16097078	KCNJ10	chr1	-46.417	10.1112	0.0152104	0.0205301	62949	Negative	protein_coding
ENSG00000118473	cg23722790	SGIP1	chr1	86.1715	20.1585	0.0152177	0.0205384	-468536	Positive	protein_coding
ENSG00000271741	cg14377468	RP11-244H3.4	chr1	-2.51068	0.585808	0.0152801	0.0206211	474617	Negative	protein_coding
ENSG00000116833	cg00754027	NR5A2	chr1	0.355969	0.0845022	0.0154558	0.0208485	-593717	Positive	protein_coding
ENSG00000117614	cg16583560	SYF2	chr1	7.01241	1.58848	0.015941	0.0214668	790895	Positive	protein_coding
ENSG00000171729	cg15188947	TMEM51	chr1	-0.339145	0.0747079	0.0160202	0.0215669	95355	Negative	protein_coding
ENSG00000069702	cg09737265	TGFBR3	chr1	-3.941	0.866668	0.0160307	0.0215777	-275187	Positive	protein_coding
ENSG00000273367	cg05528018	RP5-827C21.6	chr1	0.267588	0.0575763	0.0161141	0.0216799	694239	Positive	antisense
ENSG00000272205	cg17859187	RP11-277B15.3	chr1	-0.436818	0.100433	0.0162005	0.0217819	958860	Negative	lincRNA
ENSG00000162825	cg13947666	NBPF20	chr1	-1.5472	0.389219	0.0163086	0.0219199	671892	Negative	protein_coding
ENSG00000158859	cg18450905	ADAMTS4	chr1	11.4072	2.08387	0.0164396	0.0220841	541586	Positive	protein_coding
ENSG00000243749	cg14891611	TMEM35B	chr1	1.2078	0.27816	0.0165733	0.0222518	-38377	Positive	protein_coding
ENSG00000143341	cg13274183	HMCN1	chr1	1.49223	0.353785	0.0166883	0.0224011	-561118	Positive	protein_coding
ENSG00000203747	cg09846895	FCGR3A	chr1	-7.73863	1.43955	0.0168535	0.022602	-68811	Negative	protein_coding
ENSG00000226754	cg26044123	RP5-1024G6.5	chr1	-0.327226	0.0748268	0.0172295	0.0230765	-362752	Negative	antisense
ENSG00000117724	cg10592245	CENPF	chr1	1.01801	0.247602	0.0174202	0.0233176	-479913	Positive	protein_coding
ENSG00000239945	cg04788999	RP11-34P13.8	chr1	0.224394	0.0543583	0.0176717	0.0236308	924919	Positive	lincRNA
ENSG00000162775	cg07124668	RBM15	chr1	-1.27065	0.29478	0.017742	0.0237162	-1008143	Negative	protein_coding
ENSG00000162614	cg13296396	NEXN	chr1	0.253131	0.0585577	0.0182203	0.0243163	-340925	Positive	protein_coding
ENSG00000055732	cg25795716	MCOLN3	chr1	-0.880714	0.139164	0.0182703	0.0243775	-71763	Negative	protein_coding
ENSG00000117262	cg08001629	GPR89A	chr1	5.74394	1.46284	0.0183451	0.0244606	-216255	Positive	protein_coding
ENSG00000174514	cg10169797	MFSD4A	chr1	-28.4407	6.57697	0.0190012	0.0252989	856266	Negative	protein_coding
ENSG00000230368	cg15099879	FAM41C	chr1	0.803913	0.146566	0.0190787	0.0253925	574205	Positive	lincRNA
ENSG00000142675	cg25521012	CNKSR1	chr1	-1.28528	0.281856	0.0192304	0.025579	-950190	Negative	protein_coding
ENSG00000238260	cg17603271	RP11-46F15.2	chr1	-0.705496	0.150137	0.0194939	0.0259137	156427	Negative	antisense
ENSG00000188786	cg26007664	MTF1	chr1	-7.52285	1.77882	0.0195964	0.0260421	-335358	Negative	protein_coding
ENSG00000169213	cg08439494	RAB3B	chr1	3.90053	0.869314	0.0196084	0.0260541	993654	Positive	protein_coding
ENSG00000158246	cg01963906	FAM46B	chr1	-4.73396	1.01863	0.0200635	0.0266266	345729	Positive	protein_coding
ENSG00000132718	cg22006683	SYT11	chr1	-143.295	28.3913	0.0201029	0.0266748	-293462	Negative	protein_coding
ENSG00000116698	cg25219591	SMG7	chr1	30.2796	7.12544	0.0204302	0.0270927	-522	Positive	protein_coding
ENSG00000213516	cg01533966	RBMXL1	chr1	3.50087	0.849932	0.0210548	0.0278854	918150	Positive	protein_coding
ENSG00000143630	cg01971813	HCN3	chr1	2.02309	0.438647	0.0215115	0.0284644	-17926	Positive	protein_coding
ENSG00000154380	cg15730248	ENAH	chr1	18.483	4.19504	0.0219569	0.0290189	1009532	Positive	protein_coding
ENSG00000177301	cg02605776	KCNA2	chr1	-24.3728	5.49239	0.0226751	0.029914	444701	Negative	protein_coding
ENSG00000143355	cg04113478	LHX9	chr1	-7.40333	1.58336	0.0229443	0.0302556	-11372	Positive	protein_coding
ENSG00000162373	cg10090188	BEND5	chr1	-0.757602	0.188143	0.0231193	0.0304725	26009	Negative	protein_coding
ENSG00000118200	cg20869257	CAMSAP2	chr1	30.206	7.02348	0.0233358	0.0307465	-544262	Positive	protein_coding
ENSG00000196352	cg26271110	CD55	chr1	-5.49573	1.27416	0.0236189	0.0311055	764074	Positive	protein_coding
ENSG00000134198	cg03050884	TSPAN2	chr1	-0.869321	0.173078	0.0238013	0.0313339	-296970	Negative	protein_coding
ENSG00000203814	cg02961109	HIST2H2BF	chr1	-1.30368	0.30471	0.0239998	0.0315716	797372	Negative	protein_coding
ENSG00000225828	cg09369954	FAM229A	chr1	-4.29921	0.95301	0.0245754	0.0323022	-163108	Negative	protein_coding
ENSG00000143418	cg13560904	CERS2	chr1	-26.3016	5.49747	0.0248535	0.0326548	-949678	Negative	protein_coding
ENSG00000198860	cg00479535	TSEN15	chr1	-2.42912	0.587435	0.0250123	0.0328519	341	Negative	protein_coding
ENSG00000230124	cg25159832	ACBD6	chr1	2.2069	0.517856	0.0253558	0.0332757	-941776	Positive	protein_coding
ENSG00000188643	cg17467146	S100A16	chr1	-4.22185	0.835525	0.0258778	0.0339202	144351	Negative	protein_coding
ENSG00000118454	cg27592707	ANKRD13C	chr1	8.38525	2.15833	0.0265284	0.0347419	-213833	Negative	protein_coding
ENSG00000158714	cg17613028	SLAMF8	chr1	-0.836014	0.156711	0.0273677	0.0357745	-547868	Negative	protein_coding
ENSG00000231768	cg00777689	LINC01354	chr1	-1.34774	0.315474	0.027649	0.0361283	-913690	Negative	lincRNA
ENSG00000057757	cg22014430	PITHD1	chr1	-7.86328	1.84701	0.0277014	0.0361906	26935	Negative	protein_coding
ENSG00000162407	cg09317107	PLPP3	chr1	-14.4461	3.55686	0.0279231	0.0364625	294024	Negative	protein_coding
ENSG00000142661	cg27095256	MYOM3	chr1	1.03422	0.23105	0.0280279	0.0365858	873851	Negative	protein_coding
ENSG00000153363	cg25768273	LINC00467	chr1	-1.21275	0.29818	0.0281858	0.03677	-355501	Negative	lincRNA
ENSG00000143093	cg12563931	STRIP1	chr1	5.75042	1.36321	0.0282921	0.036899	781651	Positive	protein_coding
ENSG00000242485	cg00175702	MRPL20	chr1	7.91108	1.73451	0.0288818	0.0376026	776040	Positive	protein_coding
ENSG00000143067	cg01439876	ZNF697	chr1	0.272254	0.0682072	0.0293246	0.0381339	-618664	Positive	protein_coding
ENSG00000162419	cg10165585	GMEB1	chr1	-2.92892	0.703032	0.0293812	0.0382047	-453798	Negative	protein_coding
ENSG00000270872	cg04722247	SRGAP2D	chr1	-0.359043	0.109866	0.0296637	0.0385521	239120	Negative	unprocessed_pseudogene
ENSG00000010072	cg07918814	SPRTN	chr1	1.81385	0.442457	0.0297677	0.038671	590369	Positive	protein_coding
ENSG00000079277	cg19921581	MKNK1	chr1	-1.842	0.422291	0.029804	0.0387115	-163400	Positive	protein_coding
ENSG00000143674	cg11908002	RP5-862P8.2	chr1	-0.861896	0.212706	0.0302852	0.0393161	810935	Negative	protein_coding
ENSG00000225880	cg05378358	LINC00115	chr1	0.59173	0.137504	0.0306489	0.0397472	499454	Positive	lincRNA
ENSG00000181817	cg00836308	LSM10	chr1	-1.69821	0.408912	0.0307181	0.0398311	-303880	Negative	protein_coding
ENSG00000270392	cg04841346	PFN1P2	chr1	-0.609414	0.161423	0.0308245	0.0399602	-256000	Negative	transcribed_processed_pseudogene
ENSG00000184371	cg06956273	CSF1	chr1	4.75399	0.911763	0.0309397	0.0401007	297241	Positive	protein_coding
ENSG00000121851	cg27236173	POLR3GL	chr1	-6.31097	1.63075	0.0311743	0.0403958	6628	Negative	protein_coding
ENSG00000203705	cg11251012	TATDN3	chr1	-6.86474	1.61878	0.0319113	0.041296	-56391	Negative	protein_coding
ENSG00000142627	cg23481195	EPHA2	chr1	31.7641	6.89935	0.0325354	0.0420541	-557168	Positive	protein_coding
ENSG00000240194	cg15365029	CYMP	chr1	-0.457117	0.104412	0.032956	0.042579	73545	Negative	unitary_pseudogene
ENSG00000069812	cg11554771	HES2	chr1	1.93484	0.461547	0.0333656	0.0430892	-166888	Positive	protein_coding
ENSG00000143515	cg19362080	ATP8B2	chr1	-1.54534	0.35485	0.0340182	0.0438706	-1001941	Negative	protein_coding
ENSG00000132128	cg23538557	LRRC41	chr1	-15.8605	3.84728	0.0342403	0.044128	133188	Positive	protein_coding
ENSG00000116299	cg14777056	KIAA1324	chr1	2.26194	0.3949	0.0347437	0.044734	9138	Positive	protein_coding
ENSG00000028137	cg16882903	TNFRSF1B	chr1	-5.04494	1.14414	0.0359117	0.0461501	-310319	Positive	protein_coding
ENSG00000131236	cg02482035	CAP1	chr1	16.6616	3.8081	0.0359858	0.0462419	-714112	Positive	protein_coding
ENSG00000271992	cg10805954	RP11-42O15.3	chr1	-0.389422	0.100716	0.0359984	0.0462547	29100	Negative	lincRNA
ENSG00000169241	cg18157364	SLC50A1	chr1	-0.667084	0.155836	0.0361107	0.0463787	-101214	Negative	protein_coding
ENSG00000236723	cg17526999	RP5-1024G6.2	chr1	0.226475	0.0549836	0.0364609	0.0468045	-576555	Positive	antisense
ENSG00000162777	cg06948763	DENND2D	chr1	-0.669208	0.157215	0.0366156	0.0469893	-965513	Negative	protein_coding
ENSG00000158869	cg09846895	FCER1G	chr1	-1.7142	0.347276	0.0370736	0.0475459	-257714	Negative	protein_coding
ENSG00000142867	cg22372968	BCL10	chr1	0.665754	0.169847	0.0373954	0.0479375	-507123	Positive	protein_coding
ENSG00000158773	cg21920303	USF1	chr1	-7.34792	1.77607	0.0375464	0.0481206	-391685	Negative	protein_coding
ENSG00000198841	cg12620005	KTI12	chr1	0.753344	0.189905	0.0378902	0.0485506	-718120	Positive	protein_coding
ENSG00000163354	cg15204354	DCST2	chr1	-17.9224	4.12029	0.0382935	0.0490424	15915	Negative	protein_coding
ENSG00000143847	cg04398759	PPFIA4	chr1	-24.1301	5.80576	0.0389329	0.0497923	-105440	Positive	protein_coding
ENSG00000134371	cg13092082	CDC73	chr1	-5.38934	1.3791	0.0389762	0.0498404	488568	Positive	protein_coding
ENSG00000171865	cg14487680	RNASEH1	chr2	-13.6951	0.447706	1.89e-53	1.33e-50	-163346	Positive	protein_coding
ENSG00000233654	cg09481946	AC093388.3	chr2	-1.8438	0.0621172	5.23e-52	2.97e-49	750316	Negative	antisense
ENSG00000213699	cg07673023	SLC35F6	chr2	12.8134	0.447465	3.55e-50	1.6e-47	-447577	Negative	protein_coding
ENSG00000224043	cg04807900	CCNT2-AS1	chr2	1.1437	0.0424641	9.69e-48	2.75e-45	183433	Positive	antisense
ENSG00000279519	cg08583611	RP11-288C18.1	chr2	-3.92426	0.157483	2.42e-47	6.44e-45	-482471	Negative	TEC
ENSG00000270696	cg27560248	RP11-342K6.1	chr2	-2.4166	0.0960991	3.47e-46	8.47e-44	-651394	Negative	antisense
ENSG00000233426	cg26205062	EIF3FP3	chr2	2.98907	0.113529	3.76e-46	8.93e-44	-176869	Positive	processed_pseudogene
ENSG00000065413	cg09050313	ANKRD44	chr2	2.95227	0.116981	4.51e-46	1.04e-43	548840	Positive	protein_coding
ENSG00000226479	cg16690011	TMEM185B	chr2	4.62422	0.185807	4.41e-45	7.83e-43	-741052	Positive	protein_coding
ENSG00000243147	cg00022308	MRPL33	chr2	-8.82132	0.37747	2.69e-43	3.64e-41	142753	Negative	protein_coding
ENSG00000125633	cg20961469	CCDC93	chr2	-28.3225	1.21995	1.3e-42	1.5e-40	394953	Positive	protein_coding
ENSG00000231043	cg26205062	AC007238.1	chr2	-1.76286	0.0776888	2.14e-40	1.85e-38	-31983	Positive	processed_pseudogene
ENSG00000119760	cg07673023	SUPT7L	chr2	-24.6153	1.05406	9.48e-40	7.54e-38	-438948	Negative	protein_coding
ENSG00000132300	cg02485389	PTCD3	chr2	21.5724	0.979287	2.01e-39	1.51e-37	494291	Negative	protein_coding
ENSG00000237638	cg03813437	AC007386.2	chr2	1.28147	0.0554092	4.36e-39	3.21e-37	534865	Positive	lincRNA
ENSG00000227682	cg00972584	ATP5A1P2	chr2	0.479604	0.0229097	8.22e-38	5.25e-36	66398	Positive	transcribed_processed_pseudogene
ENSG00000229337	cg18942019	AC079305.8	chr2	0.649863	0.0272189	1.21e-37	7.49e-36	36257	Positive	antisense
ENSG00000272622	cg27373217	RP11-395N3.2	chr2	2.13623	0.104977	5.16e-37	2.94e-35	-524989	Positive	lincRNA
ENSG00000171863	cg14487680	RPS7	chr2	83.3464	4.0177	1.58e-36	8.49e-35	197176	Negative	protein_coding
ENSG00000143947	cg23241628	RPS27A	chr2	-94.0997	4.53354	1.8e-36	9.59e-35	180996	Negative	protein_coding
ENSG00000213189	cg09571233	BTF3L4P2	chr2	1.10203	0.0539603	6.09e-36	3.01e-34	-512724	Negative	processed_pseudogene
ENSG00000240253	cg09006498	FAR2P3	chr2	4.72501	0.220061	6.13e-36	3.02e-34	-403169	Positive	transcribed_unprocessed_pseudogene
ENSG00000071082	cg22016434	RPL31	chr2	83.6623	4.11106	3.46e-35	1.55e-33	-250658	Positive	protein_coding
ENSG00000235092	cg06039539	ID2-AS1	chr2	2.58967	0.123619	4.15e-35	1.85e-33	439923	Positive	antisense
ENSG00000173163	cg03262820	COMMD1	chr2	-3.22248	0.169085	1.74e-34	7.13e-33	193721	Negative	protein_coding
ENSG00000152082	cg18661819	MZT2B	chr2	21.8931	1.10193	5.18e-34	1.98e-32	-174130	Negative	protein_coding
ENSG00000119013	cg23598054	NDUFB3	chr2	-10.4	0.535374	5.21e-34	1.99e-32	181888	Negative	protein_coding
ENSG00000003509	cg08583611	NDUFAF7	chr2	-6.11241	0.330268	1.03e-33	3.73e-32	874180	Negative	protein_coding
ENSG00000171853	cg01745480	TRAPPC12	chr2	-12.7687	0.678207	5.45e-33	1.76e-31	-255765	Negative	protein_coding
ENSG00000227210	cg08518329	AC079145.4	chr2	0.595513	0.0295164	6.87e-33	2.17e-31	88027	Positive	antisense
ENSG00000168763	cg26912078	CNNM3	chr2	-12.2609	0.634327	9.29e-33	2.85e-31	-41326	Positive	protein_coding
ENSG00000230749	cg01406988	MEIS1-AS2	chr2	0.901646	0.0469811	2.65e-32	7.72e-31	-3410	Positive	antisense
ENSG00000130294	cg03896836	KIF1A	chr2	316.143	15.8631	3.21e-32	9.29e-31	106847	Negative	protein_coding
ENSG00000134330	cg05515713	IAH1	chr2	5.30005	0.275695	1.48e-31	3.98e-30	-648649	Negative	protein_coding
ENSG00000119778	cg04076037	ATAD2B	chr2	14.3551	0.820565	1.77e-31	4.71e-30	374703	Positive	protein_coding
ENSG00000189223	cg17445212	PAX8-AS1	chr2	-16.1319	0.785064	6.71e-31	1.68e-29	-24315	Negative	processed_transcript
ENSG00000124006	cg02322376	OBSL1	chr2	-65.8963	3.69606	8.59e-31	2.13e-29	-344082	Negative	protein_coding
ENSG00000138083	cg10665110	SIX3	chr2	25.8526	1.42277	1.04e-30	2.55e-29	462033	Positive	protein_coding
ENSG00000063660	cg23285209	GPC1	chr2	-16.0961	0.897043	1.16e-30	2.83e-29	-713809	Negative	protein_coding
ENSG00000176946	cg03896836	THAP4	chr2	6.57472	0.373771	1.52e-30	3.65e-29	-763797	Positive	protein_coding
ENSG00000204581	cg19149114	AC096670.3	chr2	-0.370098	0.0217565	2.44e-30	5.73e-29	555279	Negative	antisense
ENSG00000130414	cg03896836	NDUFA10	chr2	-30.2937	1.61055	4.35e-30	9.88e-29	928158	Negative	protein_coding
ENSG00000138029	cg07673023	HADHB	chr2	-20.1624	1.16515	1.3e-29	2.79e-28	-968691	Negative	protein_coding
ENSG00000115756	cg05515713	HPCAL1	chr2	-27.5021	1.55144	3.32e-29	6.82e-28	180582	Positive	protein_coding
ENSG00000229321	cg19303749	AC008269.2	chr2	-0.654053	0.0365885	3.36e-29	6.88e-28	-827189	Negative	lincRNA
ENSG00000114982	cg08974656	KANSL3	chr2	30.4076	1.73337	9.52e-29	1.88e-27	-327341	Positive	protein_coding
ENSG00000169564	cg04589975	PCBP1	chr2	-27.5046	1.63718	1.11e-28	2.17e-27	-103600	Negative	protein_coding
ENSG00000014641	cg15853117	MDH1	chr2	-55.0923	3.20703	2.53e-28	4.76e-27	538778	Positive	protein_coding
ENSG00000054356	cg13805112	PTPRN	chr2	40.2285	2.52161	2.61e-28	4.9e-27	353072	Positive	protein_coding
ENSG00000155636	cg14807549	RBM45	chr2	4.92293	0.292029	3.13e-28	5.82e-27	-338797	Positive	protein_coding
ENSG00000134317	cg05515713	GRHL1	chr2	6.06918	0.37122	5.02e-28	9.1e-27	-170614	Positive	protein_coding
ENSG00000197756	cg25108567	RPL37A	chr2	-75.349	4.40594	1.47e-27	2.56e-26	383260	Negative	protein_coding
ENSG00000138434	cg13998023	SSFA2	chr2	-65.2681	3.98568	1.9e-27	3.27e-26	909887	Negative	protein_coding
ENSG00000135945	cg27205326	REV1	chr2	-16.9034	0.999073	2.31e-27	3.92e-26	607655	Negative	protein_coding
ENSG00000071051	cg14980090	NCK2	chr2	-11.2861	0.696708	4.51e-27	7.44e-26	-449620	Negative	protein_coding
ENSG00000115446	cg00151788	UNC50	chr2	15.1399	0.922538	4.73e-27	7.77e-26	-532716	Positive	protein_coding
ENSG00000235655	cg18183628	H3F3AP4	chr2	4.69183	0.282884	5.25e-27	8.59e-26	232721	Positive	processed_pseudogene
ENSG00000151665	cg13138389	PIGF	chr2	-4.08928	0.255391	6.6e-27	1.07e-25	117894	Positive	protein_coding
ENSG00000144227	cg23663635	NXPH2	chr2	1.47615	0.0907475	7.43e-27	1.2e-25	-167328	Positive	protein_coding
ENSG00000272994	cg22877572	RP11-332H14.2	chr2	-4.60428	0.292044	1.03e-26	1.63e-25	-295450	Negative	lincRNA
ENSG00000115840	cg17824923	SLC25A12	chr2	-11.6148	0.707273	1.1e-26	1.74e-25	316456	Negative	protein_coding
ENSG00000003393	cg23598054	ALS2	chr2	-18.8461	1.19762	1.74e-26	2.68e-25	-810722	Negative	protein_coding
ENSG00000163541	cg15769486	SUCLG1	chr2	-10.781	0.715675	1.74e-26	2.68e-25	481906	Negative	protein_coding
ENSG00000116035	cg14163408	VAX2	chr2	-12.9203	0.737184	2.25e-26	3.42e-25	598868	Negative	protein_coding
ENSG00000144119	cg06886896	C1QL2	chr2	8.61806	0.48596	3.12e-26	4.68e-25	522817	Positive	protein_coding
ENSG00000234171	cg14487680	RNASEH1-AS1	chr2	-1.87845	0.117302	2.29e-25	3.11e-24	180390	Negative	antisense
ENSG00000013441	cg20218060	CLK1	chr2	375.833	24.7454	4.23e-25	5.57e-24	11547	Negative	protein_coding
ENSG00000142330	cg03896836	CAPN10	chr2	5.51798	0.354257	4.45e-25	5.85e-24	-233874	Negative	protein_coding
ENSG00000119787	cg20091107	ATL2	chr2	13.3355	0.866403	7.46e-25	9.54e-24	83757	Negative	protein_coding
ENSG00000115524	cg06760571	SF3B1	chr2	143.422	9.5661	9.22e-25	1.17e-23	46599	Negative	protein_coding
ENSG00000251569	cg14352442	RP11-724O16.1	chr2	11.6984	0.735722	1.4e-24	1.74e-23	-348207	Negative	protein_coding
ENSG00000144061	cg02391338	NPHP1	chr2	-11.476	0.745718	1.53e-24	1.89e-23	82769	Negative	protein_coding
ENSG00000171303	cg07031794	KCNK3	chr2	22.5979	1.44607	1.58e-24	1.95e-23	346609	Positive	protein_coding
ENSG00000221944	cg25506396	TIGD1	chr2	-6.25709	0.39706	2.36e-24	2.87e-23	806251	Positive	protein_coding
ENSG00000257135	cg03251967	RP11-320M2.1	chr2	0.603812	0.0367939	2.42e-24	2.94e-23	-684476	Positive	lincRNA
ENSG00000173209	cg24053619	AHSA2	chr2	39.535	2.61121	3.89e-24	4.63e-23	111281	Positive	protein_coding
ENSG00000154518	cg09421732	ATP5G3	chr2	-14.3496	0.940529	5.04e-24	5.96e-23	929723	Negative	protein_coding
ENSG00000204822	cg00036386	MRPL53	chr2	-3.88344	0.259313	6.48e-24	7.52e-23	-7117	Positive	protein_coding
ENSG00000114923	cg18014247	SLC4A3	chr2	-58.3927	3.7343	1.05e-23	1.19e-22	408394	Positive	protein_coding
ENSG00000115464	cg10736404	USP34	chr2	111.608	7.71053	1.49e-23	1.66e-22	701322	Negative	protein_coding
ENSG00000183513	cg00179844	COA5	chr2	11.0433	0.763573	1.58e-23	1.75e-22	-685492	Negative	protein_coding
ENSG00000138050	cg07392460	THUMPD2	chr2	6.35304	0.442016	1.91e-23	2.1e-22	-860133	Positive	protein_coding
ENSG00000156973	cg00616369	PDE6D	chr2	12.4792	0.887384	1.97e-23	2.16e-22	-268048	Negative	protein_coding
ENSG00000144021	cg26529376	CIAO1	chr2	14.7907	1.00676	2.87e-23	3.08e-22	919552	Positive	protein_coding
ENSG00000142327	cg11745688	RNPEPL1	chr2	5.18136	0.35225	3.95e-23	4.19e-22	-707209	Positive	protein_coding
ENSG00000114942	cg20698237	EEF1B2	chr2	13.5554	0.984063	4.27e-23	4.52e-22	155800	Negative	protein_coding
ENSG00000173272	cg09006498	MZT2A	chr2	4.61294	0.30921	5.46e-23	5.7e-22	-371598	Positive	protein_coding
ENSG00000158411	cg00151788	MITD1	chr2	16.0905	1.13853	6.78e-23	7.01e-22	-20132	Positive	protein_coding
ENSG00000169031	cg21477232	COL4A3	chr2	-58.5103	4.15586	7.24e-23	7.45e-22	34330	Negative	protein_coding
ENSG00000198399	cg04076037	ITSN2	chr2	13.1717	0.878903	1.02e-22	1.03e-21	-79497	Negative	protein_coding
ENSG00000197927	cg09006498	C2orf27A	chr2	-0.689301	0.0480907	1.28e-22	1.28e-21	629115	Negative	transcribed_unprocessed_pseudogene
ENSG00000135930	cg25506396	EIF4E2	chr2	-8.20691	0.586434	2.48e-22	2.41e-21	-803547	Positive	protein_coding
ENSG00000143952	cg15853117	VPS54	chr2	-16.6386	1.13287	2.9e-22	2.8e-21	-842315	Negative	protein_coding
ENSG00000123989	cg07867558	CHPF	chr2	38.4491	2.45736	3.02e-22	2.91e-21	-879206	Positive	protein_coding
ENSG00000183054	cg16258445	RGPD6	chr2	76.9519	5.53868	5.3e-22	4.98e-21	608629	Positive	protein_coding
ENSG00000035115	cg17497490	SH3YL1	chr2	4.41075	0.328745	5.95e-22	5.54e-21	731274	Positive	protein_coding
ENSG00000115233	cg09064687	PSMD14	chr2	-12.5354	0.858981	6.11e-22	5.68e-21	70100	Positive	protein_coding
ENSG00000065548	cg07993132	ZC3H15	chr2	-12.1324	0.904426	6.52e-22	6.04e-21	-1003	Negative	protein_coding
ENSG00000119866	cg11594131	BCL11A	chr2	1.11599	0.0779968	6.71e-22	6.21e-21	1087705	Positive	protein_coding
ENSG00000163170	cg17053845	BOLA3	chr2	-1.53765	0.113554	6.75e-22	6.24e-21	12606	Negative	protein_coding
ENSG00000272606	cg18257814	RP11-554J4.1	chr2	-0.918051	0.0644561	7.61e-22	7e-21	198615	Positive	antisense
ENSG00000188010	cg00483940	MORN2	chr2	-3.61185	0.258177	7.92e-22	7.27e-21	-1037827	Negative	protein_coding
ENSG00000235026	cg02393663	DPP10-AS1	chr2	1.33415	0.101109	1.06e-21	9.58e-21	-665366	Positive	antisense
ENSG00000122085	cg19463885	MTERF4	chr2	-13.4404	0.941502	1.14e-21	1.03e-20	615262	Negative	protein_coding
ENSG00000270757	cg09337141	HSPE1-MOB4	chr2	-2.94428	0.223445	1.23e-21	1.1e-20	740898	Negative	protein_coding
ENSG00000119801	cg18022777	YPEL5	chr2	-26.8501	1.94557	1.41e-21	1.26e-20	225156	Negative	protein_coding
ENSG00000223935	cg14150252	AC008074.3	chr2	0.816353	0.0561768	1.52e-21	1.35e-20	-552771	Positive	antisense
ENSG00000204099	cg13716566	NEU4	chr2	-1.91197	0.118956	1.76e-21	1.55e-20	975998	Negative	protein_coding
ENSG00000237298	cg17740434	TTN-AS1	chr2	-3.03806	0.216246	1.81e-21	1.59e-20	-2154	Negative	antisense
ENSG00000234072	cg19635810	AC074117.10	chr2	17.0337	1.21825	1.88e-21	1.64e-20	591917	Negative	antisense
ENSG00000119737	cg10960675	GPR75	chr2	5.1487	0.379763	2.1e-21	1.83e-20	-85491	Positive	protein_coding
ENSG00000118997	cg20913732	DNAH7	chr2	20.8895	1.59084	2.76e-21	2.38e-20	1188992	Positive	protein_coding
ENSG00000198075	cg15192223	SULT1C4	chr2	7.83777	0.529293	2.96e-21	2.55e-20	-71018	Positive	protein_coding
ENSG00000115977	cg25804718	AAK1	chr2	-84.939	6.36776	3.97e-21	3.36e-20	184896	Negative	protein_coding
ENSG00000151692	cg18115488	RNF144A	chr2	-23.3146	1.69231	4.28e-21	3.61e-20	-9693	Negative	protein_coding
ENSG00000115392	cg26205062	FANCL	chr2	-5.69001	0.441738	5.06e-21	4.24e-20	269066	Positive	protein_coding
ENSG00000115282	cg11475635	TTC31	chr2	-11.5395	0.819588	7.74e-21	6.39e-20	10164	Negative	protein_coding
ENSG00000143977	cg17064663	SNRPG	chr2	-5.53893	0.399727	1.08e-20	8.81e-20	849828	Negative	protein_coding
ENSG00000143727	cg27341428	ACP1	chr2	-19.4809	1.44463	1.1e-20	8.96e-20	-17394	Positive	protein_coding
ENSG00000162929	cg13484946	KIAA1841	chr2	18.0854	1.37383	1.91e-20	1.52e-19	-348	Positive	protein_coding
ENSG00000179818	cg11223003	PCBP1-AS1	chr2	13.4402	0.956772	2.65e-20	2.08e-19	-317864	Positive	processed_transcript
ENSG00000138080	cg18791923	EMILIN1	chr2	1.52428	0.0939749	3.66e-20	2.83e-19	-693066	Positive	protein_coding
ENSG00000136718	cg04420083	IMP4	chr2	9.95339	0.74945	5.7e-20	4.31e-19	-692726	Positive	protein_coding
ENSG00000091409	cg11027822	ITGA6	chr2	-13.3526	0.889461	7.78e-20	5.83e-19	-6468	Negative	protein_coding
ENSG00000240857	cg06061049	RDH14	chr2	3.86621	0.307935	8.77e-20	6.54e-19	-801115	Positive	protein_coding
ENSG00000159239	cg19977241	C2orf81	chr2	-1.5531	0.116959	1.03e-19	7.61e-19	71674	Negative	protein_coding
ENSG00000229816	cg08357990	DDX50P1	chr2	-0.341075	0.0270931	1.09e-19	8.03e-19	-932883	Negative	processed_pseudogene
ENSG00000115109	cg00404435	EPB41L5	chr2	42.4056	3.49403	1.34e-19	9.78e-19	357258	Positive	protein_coding
ENSG00000226564	ch.2.180908690F	FTH1P20	chr2	-0.438664	0.0360572	1.39e-19	1.01e-18	-537149	Negative	processed_pseudogene
ENSG00000188760	cg18014247	TMEM198	chr2	-3.58671	0.272453	1.43e-19	1.04e-18	324663	Negative	protein_coding
ENSG00000183891	cg15548588	TTC32	chr2	-5.46961	0.435518	1.52e-19	1.11e-18	-533503	Positive	protein_coding
ENSG00000136698	cg11216682	CFC1	chr2	3.14586	0.240302	1.63e-19	1.18e-18	-235874	Positive	protein_coding
ENSG00000115762	cg08879546	PLEKHB2	chr2	69.4661	5.81226	1.75e-19	1.26e-18	748690	Positive	protein_coding
ENSG00000144118	cg20222640	RALB	chr2	-4.36001	0.337965	1.87e-19	1.34e-18	560999	Negative	protein_coding
ENSG00000136682	cg04746199	CBWD2	chr2	-15.5426	1.26807	2.31e-19	1.65e-18	160734	Negative	protein_coding
ENSG00000168397	cg05287748	ATG4B	chr2	-14.1784	1.10098	2.86e-19	2.01e-18	-97305	Negative	protein_coding
ENSG00000169967	cg20254231	MAP3K2	chr2	-33.3548	2.70828	3.36e-19	2.35e-18	512811	Negative	protein_coding
ENSG00000170035	cg13998023	UBE2E3	chr2	-9.5526	0.76662	3.83e-19	2.66e-18	-14595	Negative	protein_coding
ENSG00000124356	cg03230456	STAMBP	chr2	5.85939	0.428544	4.18e-19	2.89e-18	-883225	Positive	protein_coding
ENSG00000082126	cg25820361	MPP4	chr2	392.764	30.6512	4.31e-19	2.98e-18	-780230	Positive	protein_coding
ENSG00000198925	cg02322376	ATG9A	chr2	-27.2676	2.1461	4.8e-19	3.3e-18	-12734	Positive	protein_coding
ENSG00000115128	cg24967852	SF3B6	chr2	6.84606	0.548075	5.1e-19	3.49e-18	904652	Positive	protein_coding
ENSG00000115839	cg04807900	RAB3GAP1	chr2	-14.8319	1.20327	5.7e-19	3.89e-18	133368	Negative	protein_coding
ENSG00000138028	cg01740367	CGREF1	chr2	-3.65683	0.272601	6.03e-19	4.1e-18	-27493	Negative	protein_coding
ENSG00000115760	cg26030832	BIRC6	chr2	-58.3535	4.67052	6.92e-19	4.67e-18	79303	Negative	protein_coding
ENSG00000125611	cg09982942	CHCHD5	chr2	-2.47021	0.193012	7.21e-19	4.86e-18	443417	Positive	protein_coding
ENSG00000115944	cg03969316	COX7A2L	chr2	-37.4095	2.99718	7.53e-19	5.07e-18	-492748	Positive	protein_coding
ENSG00000236824	cg12448545	BCYRN1	chr2	-3.02289	0.229366	8.56e-19	5.75e-18	-571324	Positive	scRNA
ENSG00000144224	cg04807900	UBXN4	chr2	-61.2757	5.03826	8.74e-19	5.86e-18	822837	Negative	protein_coding
ENSG00000091428	cg04782776	RAPGEF4	chr2	-7.20666	0.580806	9.06e-19	6.06e-18	652088	Negative	protein_coding
ENSG00000169047	cg07435537	IRS1	chr2	3.96397	0.311941	1.12e-18	7.42e-18	71479	Positive	protein_coding
ENSG00000198130	cg25856179	HIBCH	chr2	12.5878	0.993499	1.39e-18	9.14e-18	824244	Positive	protein_coding
ENSG00000123607	cg10207546	TTC21B	chr2	-10.9508	0.854211	1.57e-18	1.03e-17	-158644	Negative	protein_coding
ENSG00000135976	cg14860182	ANKRD36	chr2	37.3016	3.09604	1.81e-18	1.18e-17	807577	Positive	protein_coding
ENSG00000144233	cg21679674	AMMECR1L	chr2	3.33799	0.280065	2.17e-18	1.41e-17	-335391	Positive	protein_coding
ENSG00000229689	cg09915357	AC009237.8	chr2	1.49317	0.124206	2.25e-18	1.46e-17	531571	Positive	transcribed_unprocessed_pseudogene
ENSG00000223923	cg04995243	AC010136.2	chr2	0.62967	0.0431467	2.47e-18	1.59e-17	-422157	Positive	antisense
ENSG00000115241	cg19635810	PPM1G	chr2	-23.0921	1.85464	2.6e-18	1.67e-17	-616866	Negative	protein_coding
ENSG00000136560	cg09064687	TANK	chr2	-11.8173	0.943348	2.72e-18	1.74e-17	-101417	Positive	protein_coding
ENSG00000077380	cg17824923	DYNC1I2	chr2	-17.0292	1.38802	2.74e-18	1.76e-17	-412452	Negative	protein_coding
ENSG00000144136	cg01056174	SLC20A1	chr2	22.9463	1.91084	2.9e-18	1.85e-17	761778	Positive	protein_coding
ENSG00000115484	cg24053619	CCT4	chr2	27.5505	2.26565	3.01e-18	1.92e-17	-801948	Positive	protein_coding
ENSG00000236432	cg05526886	AC097662.2	chr2	-1.0036	0.0824314	3.06e-18	1.95e-17	-384907	Negative	antisense
ENSG00000128694	cg04955406	OSGEPL1	chr2	3.67717	0.313601	3.5e-18	2.22e-17	37572	Positive	protein_coding
ENSG00000163006	cg15192223	CCDC138	chr2	-1.38167	0.111913	3.64e-18	2.3e-17	337828	Negative	protein_coding
ENSG00000171450	cg23092714	CDK5R2	chr2	-21.5302	1.72489	4.41e-18	2.75e-17	-31841	Positive	protein_coding
ENSG00000168288	cg15155801	MMADHC	chr2	-6.93577	0.588738	4.55e-18	2.83e-17	17983	Negative	protein_coding
ENSG00000163794	cg07673023	UCN	chr2	0.471108	0.0350805	4.73e-18	2.94e-17	-95539	Negative	protein_coding
ENSG00000204745	cg18983330	AC083899.3	chr2	1.77857	0.145757	4.89e-18	3.04e-17	930126	Negative	unprocessed_pseudogene
ENSG00000239467	cg20961425	AC007405.6	chr2	0.565714	0.047583	5.92e-18	3.66e-17	938335	Positive	lincRNA
ENSG00000135951	cg15496985	TSGA10	chr2	6.25461	0.524256	6.75e-18	4.16e-17	157507	Positive	protein_coding
ENSG00000055917	cg15548588	PUM2	chr2	-47.3098	3.92274	6.76e-18	4.17e-17	-885563	Negative	protein_coding
ENSG00000084710	cg04076037	EFR3B	chr2	-22.3042	1.80988	7.79e-18	4.78e-17	918709	Negative	protein_coding
ENSG00000008869	cg08583611	HEATR5B	chr2	-14.7971	1.17293	7.92e-18	4.85e-17	-610932	Positive	protein_coding
ENSG00000171551	cg01230160	ECEL1	chr2	31.5048	2.43857	7.93e-18	4.85e-17	875295	Positive	protein_coding
ENSG00000144134	cg08231831	RABL2A	chr2	-7.86885	0.694442	8.4e-18	5.13e-17	999759	Negative	protein_coding
ENSG00000082146	cg14791081	STRADB	chr2	-12.3067	0.988831	9.5e-18	5.77e-17	-256191	Negative	protein_coding
ENSG00000198648	cg12059950	STK39	chr2	-15.8005	1.32903	1.14e-17	6.87e-17	207131	Negative	protein_coding
ENSG00000163795	cg01740367	ZNF513	chr2	-6.2424	0.519248	1.17e-17	7.04e-17	-305839	Negative	protein_coding
ENSG00000170144	cg25844977	HNRNPA3	chr2	-72.0103	5.95553	1.52e-17	9e-17	-512291	Negative	protein_coding
ENSG00000204843	cg26040211	DCTN1	chr2	57.3114	4.94921	1.86e-17	1.09e-16	597826	Negative	protein_coding
ENSG00000032389	cg14487680	TSSC1	chr2	-5.02315	0.422036	2.19e-17	1.28e-16	189159	Positive	protein_coding
ENSG00000066248	cg11043438	NGEF	chr2	-2.40944	0.19926	2.52e-17	1.46e-16	-289911	Negative	protein_coding
ENSG00000138381	cg11185688	ASNSD1	chr2	-18.253	1.49101	3.05e-17	1.75e-16	-2390	Negative	protein_coding
ENSG00000178171	cg09006498	AMER3	chr2	5.30234	0.417772	3.09e-17	1.77e-16	-337867	Positive	protein_coding
ENSG00000144406	ch.2.4215183F	UNC80	chr2	-35.2882	3.02669	3.33e-17	1.9e-16	-765202	Negative	protein_coding
ENSG00000260942	cg14375807	CAPN10-AS1	chr2	-1.79307	0.145126	3.33e-17	1.9e-16	-349544	Negative	antisense
ENSG00000124357	cg25719132	NAGK	chr2	-21.7166	1.7996	3.4e-17	1.94e-16	770805	Negative	protein_coding
ENSG00000072182	cg02322376	ASIC4	chr2	-26.6432	2.18204	4.39e-17	2.48e-16	307524	Negative	protein_coding
ENSG00000115041	cg23970798	KCNIP3	chr2	-1.27395	0.104353	5.39e-17	3.01e-16	131652	Negative	protein_coding
ENSG00000115368	cg04955406	WDR75	chr2	9.20484	0.802107	5.55e-17	3.09e-16	-342786	Negative	protein_coding
ENSG00000115884	cg09853866	SDC1	chr2	-1.71838	0.14774	5.75e-17	3.2e-16	150102	Negative	protein_coding
ENSG00000228400	ch.2.2616385F	AC079154.1	chr2	0.64667	0.0558333	6.24e-17	3.47e-16	923099	Positive	antisense
ENSG00000205795	cg09050269	CYS1	chr2	-3.45994	0.275615	6.29e-17	3.49e-16	790464	Negative	protein_coding
ENSG00000231646	cg07993132	FSIP2-AS1	chr2	-0.333329	0.0299361	6.83e-17	3.78e-16	834882	Positive	antisense
ENSG00000115350	cg07023902	POLE4	chr2	-7.15217	0.607667	7.18e-17	3.97e-16	503436	Negative	protein_coding
ENSG00000115942	cg23092801	ORC2	chr2	-6.34244	0.544431	7.19e-17	3.97e-16	-634357	Negative	protein_coding
ENSG00000180228	cg14807549	PRKRA	chr2	16.4471	1.46602	1.03e-16	5.61e-16	19807	Positive	protein_coding
ENSG00000244563	cg13703087	AC006011.4	chr2	-0.686176	0.0593573	1.08e-16	5.88e-16	244665	Negative	processed_pseudogene
ENSG00000115548	cg01314398	KDM3A	chr2	-47.6024	4.01754	1.11e-16	6.03e-16	901960	Negative	protein_coding
ENSG00000157851	cg01740367	DPYSL5	chr2	-30.5928	2.68418	1.29e-16	6.95e-16	-223649	Negative	protein_coding
ENSG00000143933	cg13138389	CALM2	chr2	-82.1975	7.1287	1.81e-16	9.6e-16	-461252	Positive	protein_coding
ENSG00000182600	cg08817786	C2orf82	chr2	-3.85007	0.317638	2.04e-16	1.08e-15	251278	Negative	protein_coding
ENSG00000138002	cg25142582	IFT172	chr2	-19.048	1.65793	2.12e-16	1.12e-15	-232176	Negative	protein_coding
ENSG00000162975	cg16208369	KCNF1	chr2	1.01161	0.07781	2.12e-16	1.12e-15	99333	Positive	protein_coding
ENSG00000119041	cg06760571	GTF3C3	chr2	15.043	1.27279	2.69e-16	1.4e-15	672079	Negative	protein_coding
ENSG00000068878	cg15418474	PSME4	chr2	20.9145	1.78581	2.78e-16	1.45e-15	-76948	Positive	protein_coding
ENSG00000162882	cg18542495	HAAO	chr2	0.903968	0.0755855	3.24e-16	1.68e-15	501313	Positive	protein_coding
ENSG00000223658	cg09325404	C1GALT1C1L	chr2	-1.01679	0.0883742	4.45e-16	2.27e-15	1180	Negative	protein_coding
ENSG00000214595	cg18257814	EML6	chr2	-14.4528	1.20656	4.63e-16	2.36e-15	-695795	Positive	protein_coding
ENSG00000082258	cg27450667	CCNT2	chr2	47.4331	4.26673	4.8e-16	2.45e-15	-958292	Negative	protein_coding
ENSG00000115020	cg19303749	PIKFYVE	chr2	33.561	3.01505	4.86e-16	2.47e-15	640741	Positive	protein_coding
ENSG00000153107	cg09718640	ANAPC1	chr2	-18.7604	1.6178	5.19e-16	2.63e-15	1153009	Negative	protein_coding
ENSG00000233230	cg00620552	AC079807.2	chr2	0.96635	0.088515	5.75e-16	2.91e-15	122720	Negative	antisense
ENSG00000075292	cg17064663	ZNF638	chr2	-36.0353	2.95841	8.1e-16	4.04e-15	145371	Negative	protein_coding
ENSG00000082438	cg10207546	COBLL1	chr2	-41.3081	3.8578	8.76e-16	4.37e-15	1045207	Negative	protein_coding
ENSG00000138101	cg10386445	DTNB	chr2	14.4389	1.15756	8.99e-16	4.47e-15	605581	Positive	protein_coding
ENSG00000116001	cg21288083	TIA1	chr2	135.121	11.4903	9.3e-16	4.62e-15	48732	Positive	protein_coding
ENSG00000138382	cg14352442	METTL5	chr2	3.31792	0.289151	1e-15	4.95e-15	17606	Negative	protein_coding
ENSG00000115137	cg04076037	DNAJC27	chr2	8.77042	0.789881	1.16e-15	5.72e-15	-820269	Negative	protein_coding
ENSG00000115364	cg18470397	MRPL19	chr2	3.36696	0.300529	1.18e-15	5.81e-15	796943	Positive	protein_coding
ENSG00000114993	cg00036386	RTKN	chr2	-1.5469	0.137349	1.28e-15	6.28e-15	39029	Negative	protein_coding
ENSG00000115568	cg18014247	ZNF142	chr2	-8.30423	0.748252	1.43e-15	6.98e-15	581084	Positive	protein_coding
ENSG00000124370	cg23427269	MCEE	chr2	-1.10664	0.0973565	1.45e-15	7.07e-15	-341372	Positive	protein_coding
ENSG00000163161	cg21679674	ERCC3	chr2	7.3141	0.650986	1.85e-15	8.91e-15	268949	Positive	protein_coding
ENSG00000180902	cg11745688	D2HGDH	chr2	8.92005	0.670343	1.86e-15	8.95e-15	461589	Negative	protein_coding
ENSG00000115084	cg18477962	SLC35F5	chr2	-13.696	1.25188	1.93e-15	9.27e-15	-983438	Negative	protein_coding
ENSG00000011566	cg01000469	MAP4K3	chr2	21.7719	1.9726	2.36e-15	1.12e-14	-128676	Positive	protein_coding
ENSG00000115138	cg13265513	POMC	chr2	-0.652863	0.0505201	2.68e-15	1.27e-14	-118494	Positive	protein_coding
ENSG00000155729	cg05142833	KCTD18	chr2	-3.80123	0.354058	3.03e-15	1.43e-14	-749163	Negative	protein_coding
ENSG00000118960	cg02458141	HS1BP3	chr2	1.74649	0.166398	3.34e-15	1.57e-14	57708	Negative	protein_coding
ENSG00000143924	cg15200793	EML4	chr2	-16.5977	1.45811	3.69e-15	1.73e-14	-325824	Positive	protein_coding
ENSG00000136531	cg10207546	SCN2A	chr2	-13.5387	1.21061	4e-15	1.87e-14	-503838	Positive	protein_coding
ENSG00000116062	cg01352634	MSH6	chr2	-11.6483	1.03018	4.18e-15	1.95e-14	-211573	Negative	protein_coding
ENSG00000115325	cg20340806	DOK1	chr2	-2.53296	0.218088	4.34e-15	2.02e-14	370207	Negative	protein_coding
ENSG00000072163	cg08472795	LIMS2	chr2	1.20405	0.0995391	4.83e-15	2.24e-14	671298	Positive	protein_coding
ENSG00000132323	cg16631539	ILKAP	chr2	-2.53005	0.233396	4.99e-15	2.3e-14	-110091	Negative	protein_coding
ENSG00000138380	cg05983229	CARF	chr2	8.69424	0.800367	5.31e-15	2.44e-14	-415917	Negative	protein_coding
ENSG00000196290	cg15144697	NIF3L1	chr2	-4.83995	0.440477	5.61e-15	2.58e-14	-181924	Negative	protein_coding
ENSG00000204186	cg23270712	ZDBF2	chr2	-22.8885	2.06277	5.7e-15	2.61e-14	789679	Negative	protein_coding
ENSG00000187231	cg14807549	SESTD1	chr2	15.6657	1.45834	6.31e-15	2.88e-14	-650457	Positive	protein_coding
ENSG00000115159	cg14784877	GPD2	chr2	11.6879	1.09316	6.65e-15	3.03e-14	-864324	Negative	protein_coding
ENSG00000085978	cg25506396	ATG16L1	chr2	-5.22716	0.473858	6.87e-15	3.12e-14	-144170	Positive	protein_coding
ENSG00000197223	cg15810720	C1D	chr2	-4.38801	0.40941	7.78e-15	3.52e-14	212456	Negative	protein_coding
ENSG00000163359	cg17283117	COL6A3	chr2	-1.18888	0.0945231	9.6e-15	4.31e-14	915975	Negative	protein_coding
ENSG00000197713	cg07239116	RPE	chr2	-3.51845	0.352888	9.92e-15	4.45e-14	-168961	Positive	protein_coding
ENSG00000152284	cg26316101	TCF7L1	chr2	1.29248	0.111567	1.09e-14	4.87e-14	-195044	Negative	protein_coding
ENSG00000169629	cg04746199	RGPD8	chr2	-8.63626	0.805318	1.23e-14	5.47e-14	906865	Negative	protein_coding
ENSG00000115677	cg05287748	HDLBP	chr2	-33.8832	3.07705	1.62e-14	7.13e-14	507254	Negative	protein_coding
ENSG00000088205	cg20961469	DDX18	chr2	-8.46402	0.819499	1.64e-14	7.21e-14	-495740	Negative	protein_coding
ENSG00000198914	cg14956808	POU3F3	chr2	0.473222	0.0438061	1.64e-14	7.21e-14	442936	Positive	protein_coding
ENSG00000128699	cg04955406	ORMDL1	chr2	29.6799	2.72236	2.19e-14	9.5e-14	13965	Negative	protein_coding
ENSG00000151687	cg06477289	ANKAR	chr2	-1.85809	0.176068	2.57e-14	1.11e-13	-861018	Negative	protein_coding
ENSG00000198612	cg01613696	COPS8	chr2	24.9247	2.33945	3.79e-14	1.6e-13	-975059	Positive	protein_coding
ENSG00000163251	cg10440877	FZD5	chr2	22.6447	2.11226	4.19e-14	1.77e-13	-248847	Positive	protein_coding
ENSG00000115486	cg26316101	GGCX	chr2	-4.44376	0.420267	4.98e-14	2.09e-13	-216284	Positive	protein_coding
ENSG00000115419	cg25856179	GLS	chr2	66.2764	6.30056	5.16e-14	2.16e-13	-133152	Negative	protein_coding
ENSG00000267784	cg17740434	RP11-171I2.1	chr2	-0.534005	0.0525953	5.32e-14	2.22e-13	200120	Negative	antisense
ENSG00000115694	cg03896836	STK25	chr2	12.8521	1.25849	5.39e-14	2.25e-13	-672062	Positive	protein_coding
ENSG00000162881	cg05422883	OXER1	chr2	-0.676187	0.0579341	5.42e-14	2.26e-13	83311	Negative	protein_coding
ENSG00000138400	cg19303749	MDH1B	chr2	4.40429	0.427132	5.44e-14	2.27e-13	887751	Positive	protein_coding
ENSG00000162961	cg02727605	DPY30	chr2	5.46349	0.50027	5.55e-14	2.31e-13	143122	Negative	protein_coding
ENSG00000163013	cg20340806	FBXO41	chr2	-10.8694	1.0386	5.78e-14	2.4e-13	924137	Negative	protein_coding
ENSG00000144460	cg15352431	NYAP2	chr2	1.83075	0.175662	6.25e-14	2.59e-13	-631582	Positive	protein_coding
ENSG00000144426	cg05983229	NBEAL1	chr2	4.39743	0.439128	6.85e-14	2.83e-13	-313252	Negative	protein_coding
ENSG00000196843	cg14021728	ARID5A	chr2	-9.55831	0.938852	7.18e-14	2.96e-13	215003	Negative	protein_coding
ENSG00000144362	cg14352442	PHOSPHO2	chr2	1.21001	0.120675	7.23e-14	2.98e-13	-133233	Negative	protein_coding
ENSG00000115423	cg01295084	DNAH6	chr2	-3.17582	0.317706	8.67e-14	3.54e-13	-356	Negative	protein_coding
ENSG00000168958	cg19382545	MFF	chr2	-35.801	3.56064	9.43e-14	3.83e-13	526198	Positive	protein_coding
ENSG00000187514	cg23081357	PTMA	chr2	-105.159	9.82833	1.19e-13	4.78e-13	861562	Negative	protein_coding
ENSG00000163026	cg04076037	WDCP	chr2	3.32117	0.337513	1.22e-13	4.9e-13	94020	Positive	protein_coding
ENSG00000237580	cg04647948	GCSHP3	chr2	-0.241006	0.0236829	1.28e-13	5.13e-13	-30411	Negative	processed_pseudogene
ENSG00000196151	cg03994381	WDSUB1	chr2	-2.10295	0.199667	1.42e-13	5.67e-13	379214	Negative	protein_coding
ENSG00000236283	cg01975548	AC013463.2	chr2	0.293263	0.0286783	1.68e-13	6.68e-13	-363468	Positive	antisense
ENSG00000136536	cg12860092	MARCHF7	chr2	-27.9572	2.67204	1.84e-13	7.28e-13	743839	Positive	protein_coding
ENSG00000144029	cg25820224	MRPS5	chr2	-5.74775	0.572569	1.89e-13	7.47e-13	36437	Negative	protein_coding
ENSG00000144579	cg02322376	CTDSP1	chr2	-17.1613	1.56729	2.15e-13	8.48e-13	-808390	Negative	protein_coding
ENSG00000115947	cg06394585	ORC4	chr2	-11.5127	1.15776	2.23e-13	8.78e-13	89949	Positive	protein_coding
ENSG00000196975	cg25804718	ANXA4	chr2	-10.2562	0.987414	2.28e-13	8.97e-13	1532	Negative	protein_coding
ENSG00000274049	cg08434152	INO80B-WBP1	chr2	-10.559	1.00808	2.38e-13	9.35e-13	276445	Positive	protein_coding
ENSG00000152056	cg01589079	AP1S3	chr2	-1.80769	0.175693	2.43e-13	9.54e-13	1053867	Negative	protein_coding
ENSG00000074054	cg16605590	CLASP1	chr2	34.5429	3.41695	2.91e-13	1.13e-12	398881	Positive	protein_coding
ENSG00000138036	cg15131722	DYNC2LI1	chr2	12.0264	1.19574	2.92e-13	1.14e-12	-587989	Positive	protein_coding
ENSG00000231259	cg06415678	AC125232.1	chr2	9.99336	1.04121	3.12e-13	1.21e-12	-468318	Negative	unprocessed_pseudogene
ENSG00000144228	cg10532188	SPOPL	chr2	-8.9132	0.916157	3.27e-13	1.27e-12	-928	Positive	protein_coding
ENSG00000174501	cg25241038	ANKRD36C	chr2	10.3664	1.00254	3.46e-13	1.34e-12	-562192	Positive	protein_coding
ENSG00000134324	cg23689227	LPIN1	chr2	-16.9873	1.66635	3.54e-13	1.37e-12	-107654	Negative	protein_coding
ENSG00000231584	cg07224438	FAHD2CP	chr2	-2.53497	0.234004	4.15e-13	1.59e-12	-750197	Negative	transcribed_unprocessed_pseudogene
ENSG00000128654	cg02328579	MTX2	chr2	-4.80551	0.472928	4.57e-13	1.74e-12	142155	Negative	protein_coding
ENSG00000072195	cg02322376	SPEG	chr2	-6.38226	0.619744	4.58e-13	1.75e-12	228197	Negative	protein_coding
ENSG00000152672	cg07094440	CLEC4F	chr2	-8.6246	0.857307	4.59e-13	1.75e-12	90751	Negative	protein_coding
ENSG00000163516	cg12186652	ANKZF1	chr2	23.8577	2.19322	4.87e-13	1.85e-12	243999	Negative	protein_coding
ENSG00000196659	cg26709537	TTC30B	chr2	6.15452	0.628667	5.31e-13	2.02e-12	-336538	Positive	protein_coding
ENSG00000228474	cg00022308	OST4	chr2	-4.46792	0.439709	5.52e-13	2.09e-12	558492	Positive	protein_coding
ENSG00000144357	cg09392443	UBR3	chr2	-37.7143	3.98885	6.43e-13	2.42e-12	-989018	Negative	protein_coding
ENSG00000118961	cg02458141	LDAH	chr2	-2.19343	0.222376	6.63e-13	2.49e-12	-65858	Negative	protein_coding
ENSG00000169764	cg15853117	UGP2	chr2	-14.4635	1.40159	7.14e-13	2.68e-12	791109	Positive	protein_coding
ENSG00000214711	cg26072433	CAPN14	chr2	-0.804599	0.0808987	7.32e-13	2.74e-12	867262	Negative	protein_coding
ENSG00000163596	cg05983229	ICA1L	chr2	8.3308	0.851914	8.34e-13	3.1e-12	554981	Positive	protein_coding
ENSG00000143878	cg13413084	RHOB	chr2	51.4388	4.77344	9.15e-13	3.39e-12	116603	Positive	protein_coding
ENSG00000144381	cg06760571	HSPD1	chr2	58.2714	5.48833	1.04e-12	3.84e-12	-51470	Positive	protein_coding
ENSG00000176771	cg20838753	NCKAP5	chr2	3.11695	0.31675	1.29e-12	4.72e-12	1652617	Positive	protein_coding
ENSG00000030419	cg01663232	IKZF2	chr2	-5.71275	0.606691	1.32e-12	4.82e-12	152525	Negative	protein_coding
ENSG00000197635	cg08973102	DPP4	chr2	-0.69856	0.0729518	1.37e-12	4.99e-12	351777	Positive	protein_coding
ENSG00000162927	cg24053619	PUS10	chr2	2.66331	0.25972	1.38e-12	5.03e-12	125915	Negative	protein_coding
ENSG00000283312	cg00476790	RP11-562I5.1	chr2	-2.16868	0.19853	1.45e-12	5.27e-12	-264252	Negative	processed_pseudogene
ENSG00000048991	cg09641469	R3HDM1	chr2	4.2067	0.462289	1.54e-12	5.58e-12	508189	Negative	protein_coding
ENSG00000144034	cg08434152	TPRKB	chr2	4.57073	0.443844	1.54e-12	5.58e-12	449539	Positive	protein_coding
ENSG00000064933	cg09481946	PMS1	chr2	8.39865	0.867437	1.65e-12	5.96e-12	-454	Positive	protein_coding
ENSG00000170500	cg05692746	LONRF2	chr2	-21.4011	2.17632	1.73e-12	6.23e-12	47831	Negative	protein_coding
ENSG00000136002	cg09596239	ARHGEF4	chr2	-10.8728	1.15919	1.93e-12	6.92e-12	654453	Negative	protein_coding
ENSG00000163040	cg10989806	CCDC74A	chr2	1.02331	0.103111	2e-12	7.16e-12	452589	Positive	protein_coding
ENSG00000115053	cg15286942	NCL	chr2	60.3152	6.42249	2.17e-12	7.75e-12	-735897	Positive	protein_coding
ENSG00000138032	cg09615101	PPM1B	chr2	-31.6908	3.30314	2.39e-12	8.49e-12	-773399	Negative	protein_coding
ENSG00000272054	cg08583611	RP11-423P10.2	chr2	-0.735156	0.0717137	2.7e-12	9.55e-12	851424	Negative	sense_intronic
ENSG00000162972	cg08779779	C2orf47	chr2	-1.60671	0.170174	2.82e-12	9.95e-12	497474	Negative	protein_coding
ENSG00000082898	cg10736404	XPO1	chr2	86.3703	8.86409	2.89e-12	1.02e-11	410936	Negative	protein_coding
ENSG00000213355	cg08151337	CNN2P8	chr2	1.01851	0.106997	3.2e-12	1.12e-11	-469685	Positive	processed_pseudogene
ENSG00000132329	cg18401108	RAMP1	chr2	-0.699695	0.0728814	3.48e-12	1.21e-11	650780	Negative	protein_coding
ENSG00000146556	cg10762132	WASH2P	chr2	-17.987	1.79576	3.89e-12	1.35e-11	942594	Negative	transcribed_unprocessed_pseudogene
ENSG00000163126	cg14021728	ANKRD23	chr2	-2.78583	0.295345	3.94e-12	1.37e-11	-502786	Negative	protein_coding
ENSG00000162981	cg10881774	FAM84A	chr2	5.35031	0.573215	4.1e-12	1.42e-11	-929016	Positive	protein_coding
ENSG00000115556	cg21295476	PLCD4	chr2	-142.229	13.9738	4.21e-12	1.46e-11	-372319	Negative	protein_coding
ENSG00000115825	cg08583611	PRKD3	chr2	-34.3434	3.47617	4.24e-12	1.47e-11	-893051	Negative	protein_coding
ENSG00000138035	cg18257814	PNPT1	chr2	-6.1305	0.570623	4.46e-12	1.54e-11	-214767	Negative	protein_coding
ENSG00000115239	cg22215492	ASB3	chr2	-10.8219	1.16154	5.41e-12	1.86e-11	582747	Negative	protein_coding
ENSG00000176887	cg11041686	SOX11	chr2	0.996809	0.107075	6.56e-12	2.24e-11	-948211	Positive	protein_coding
ENSG00000243943	cg01740367	ZNF512	chr2	13.4986	1.43183	6.9e-12	2.35e-11	511573	Positive	protein_coding
ENSG00000153094	cg26911026	BCL2L11	chr2	-13.3953	1.43912	7.12e-12	2.42e-11	386701	Negative	protein_coding
ENSG00000144485	cg02053006	HES6	chr2	0.660291	0.0663609	8.27e-12	2.8e-11	-816591	Positive	protein_coding
ENSG00000188011	cg23285209	RTP5	chr2	-0.439206	0.0377927	8.27e-12	2.8e-11	720128	Negative	protein_coding
ENSG00000163249	cg07024464	CCNYL1	chr2	-2.65017	0.275363	8.29e-12	2.8e-11	-662258	Negative	protein_coding
ENSG00000144451	cg01774108	SPAG16	chr2	-3.37719	0.361188	1.13e-11	3.78e-11	132990	Negative	protein_coding
ENSG00000080345	cg13570853	RIF1	chr2	34.6722	3.69608	1.21e-11	4.03e-11	-183	Negative	protein_coding
ENSG00000115514	cg01430870	TXNDC9	chr2	4.25881	0.456046	1.22e-11	4.06e-11	18954	Positive	protein_coding
ENSG00000143995	cg01406988	MEIS1	chr2	-14.3584	1.62835	1.23e-11	4.09e-11	-2226	Negative	protein_coding
ENSG00000270557	cg09971156	RP11-546J1.1	chr2	-0.39234	0.0428395	1.24e-11	4.12e-11	863	Negative	lincRNA
ENSG00000123636	cg12860092	BAZ2B	chr2	-47.17	5.07074	1.31e-11	4.34e-11	-350361	Positive	protein_coding
ENSG00000135916	cg03727500	ITM2C	chr2	-43.6885	4.57012	1.32e-11	4.37e-11	-618984	Positive	protein_coding
ENSG00000171174	cg07380771	RBKS	chr2	2.51335	0.245402	1.42e-11	4.69e-11	635650	Positive	protein_coding
ENSG00000163481	cg14345026	RNF25	chr2	-3.58588	0.358736	1.52e-11	5.01e-11	542746	Negative	protein_coding
ENSG00000128708	cg04530992	HAT1	chr2	10.1838	1.09326	1.59e-11	5.23e-11	28177	Positive	protein_coding
ENSG00000135913	cg02322376	USP37	chr2	22.8341	2.27447	1.62e-11	5.32e-11	756395	Negative	protein_coding
ENSG00000153214	cg00162206	TMEM87B	chr2	6.60581	0.718031	1.72e-11	5.63e-11	-427067	Positive	protein_coding
ENSG00000079263	cg17486579	SP140	chr2	0.925028	0.102722	2.19e-11	7.11e-11	-41745	Positive	protein_coding
ENSG00000237522	cg01648237	NONOP2	chr2	-0.180265	0.0199729	2.25e-11	7.3e-11	208112	Positive	processed_pseudogene
ENSG00000235688	cg14025123	AC116614.1	chr2	1.61991	0.132912	2.28e-11	7.39e-11	-699788	Positive	antisense
ENSG00000239474	cg14352442	KLHL41	chr2	6.37137	0.687976	2.32e-11	7.52e-11	-317985	Negative	protein_coding
ENSG00000229267	cg26166177	AC072062.1	chr2	1.25983	0.128998	2.4e-11	7.77e-11	-585928	Positive	antisense
ENSG00000144580	cg12186652	CNOT9	chr2	6.51008	0.670232	2.42e-11	7.83e-11	-417178	Negative	protein_coding
ENSG00000144229	cg24936472	THSD7B	chr2	-23.7846	2.66323	2.44e-11	7.9e-11	968004	Negative	protein_coding
ENSG00000132330	cg24887490	SCLY	chr2	-3.5969	0.367245	2.5e-11	8.07e-11	190034	Negative	protein_coding
ENSG00000162944	cg17286258	RFTN2	chr2	7.98048	0.846754	2.54e-11	8.19e-11	-133202	Negative	protein_coding
ENSG00000157833	cg01740367	GAREM2	chr2	-7.01745	0.71243	2.59e-11	8.35e-11	-898308	Negative	protein_coding
ENSG00000169016	cg27471536	E2F6	chr2	-2.69989	0.281961	2.67e-11	8.59e-11	-311259	Negative	protein_coding
ENSG00000273456	cg05983229	RP11-686O6.2	chr2	-0.246055	0.0261376	2.67e-11	8.59e-11	953199	Positive	lincRNA
ENSG00000135637	cg19885631	CCDC142	chr2	1.99829	0.219026	2.68e-11	8.62e-11	-292958	Positive	protein_coding
ENSG00000172985	cg00203089	SH3RF3	chr2	-2.24557	0.236059	2.76e-11	8.87e-11	594526	Negative	protein_coding
ENSG00000163001	cg06622286	CFAP36	chr2	-23.5105	2.33026	2.79e-11	8.96e-11	471290	Negative	protein_coding
ENSG00000144161	cg27310163	ZC3H8	chr2	4.20682	0.463686	2.91e-11	9.32e-11	373135	Positive	protein_coding
ENSG00000162999	cg16733505	DUSP19	chr2	1.02827	0.122294	2.93e-11	9.38e-11	186829	Positive	protein_coding
ENSG00000273466	cg27269112	RP11-548H3.1	chr2	-0.492432	0.0511699	3.58e-11	1.14e-10	-251010	Negative	antisense
ENSG00000231943	cg16894184	PGM5P4-AS1	chr2	2.51057	0.258601	3.82e-11	1.21e-10	-984865	Positive	lincRNA
ENSG00000236107	cg07072567	AC010127.3	chr2	0.479575	0.0529705	3.87e-11	1.23e-10	718661	Positive	antisense
ENSG00000116031	cg23644992	CD207	chr2	-3.19473	0.347423	5.45e-11	1.71e-10	69265	Negative	protein_coding
ENSG00000187123	cg12035092	LYPD6	chr2	-3.87989	0.404691	5.66e-11	1.77e-10	454328	Negative	protein_coding
ENSG00000138399	cg14352442	FASTKD1	chr2	6.75279	0.707767	6.36e-11	1.97e-10	299179	Negative	protein_coding
ENSG00000115904	cg09181878	SOS1	chr2	14.7076	1.58923	6.49e-11	2.01e-10	-229860	Negative	protein_coding
ENSG00000115365	cg18774447	LANCL1	chr2	-22.9062	2.8419	6.72e-11	2.08e-10	726790	Negative	protein_coding
ENSG00000138030	cg15478930	KHK	chr2	3.66581	0.36931	7.67e-11	2.36e-10	-342488	Positive	protein_coding
ENSG00000135974	cg11239111	C2orf49	chr2	23.4795	2.61838	8.12e-11	2.5e-10	-857186	Positive	protein_coding
ENSG00000168393	cg06137232	DTYMK	chr2	-2.3751	0.264503	8.51e-11	2.61e-10	-439055	Negative	protein_coding
ENSG00000171103	cg19189422	TRMT61B	chr2	-1.53296	0.178182	8.9e-11	2.72e-10	347325	Negative	protein_coding
ENSG00000183281	cg08229694	PLGLB1	chr2	8.73757	0.996798	9.1e-11	2.78e-10	-807485	Positive	protein_coding
ENSG00000153827	cg23011754	TRIP12	chr2	75.6604	8.94034	9.31e-11	2.85e-10	950095	Positive	protein_coding
ENSG00000115211	cg21764843	EIF2B4	chr2	-9.43703	1.03313	1.15e-10	3.49e-10	-894302	Negative	protein_coding
ENSG00000138386	cg18838207	NAB1	chr2	28.2711	3.28407	1.3e-10	3.93e-10	862216	Positive	protein_coding
ENSG00000144031	cg17348029	ANKRD53	chr2	4.01493	0.435707	1.43e-10	4.3e-10	-945977	Positive	protein_coding
ENSG00000269973	cg17588464	RP11-95D17.1	chr2	-1.28755	0.147237	1.49e-10	4.47e-10	134429	Negative	lincRNA
ENSG00000184898	ch.2.3109681F	RBM43	chr2	1.66321	0.188214	1.51e-10	4.53e-10	-647141	Positive	protein_coding
ENSG00000188452	cg14097374	CERKL	chr2	-8.18951	0.952723	1.54e-10	4.62e-10	-459290	Positive	protein_coding
ENSG00000176714	cg01740367	CCDC121	chr2	3.61228	0.394383	1.69e-10	5.05e-10	-554243	Positive	protein_coding
ENSG00000162959	cg02727605	MEMO1	chr2	4.88825	0.5494	1.9e-10	5.65e-10	145871	Positive	protein_coding
ENSG00000271855	cg11056409	RP11-214N9.1	chr2	-0.327593	0.0365607	1.95e-10	5.79e-10	552886	Negative	lincRNA
ENSG00000226321	cg12697306	CROCC2	chr2	-0.652237	0.0575024	2.09e-10	6.19e-10	-746659	Positive	protein_coding
ENSG00000214694	cg12874164	ARHGEF33	chr2	1.15072	0.135611	2.72e-10	7.97e-10	-234673	Positive	protein_coding
ENSG00000272667	cg03723556	RP11-395A13.2	chr2	-0.441045	0.0511443	3.06e-10	8.93e-10	498461	Negative	lincRNA
ENSG00000168906	cg02485389	MAT2A	chr2	159.673	17.3413	3.25e-10	9.47e-10	-72764	Positive	protein_coding
ENSG00000153237	cg12860092	CCDC148	chr2	-2.66424	0.304283	3.97e-10	1.15e-09	797537	Negative	protein_coding
ENSG00000163029	cg06061049	SMC6	chr2	4.59941	0.53126	4.19e-10	1.21e-09	89796	Positive	protein_coding
ENSG00000197121	cg23273364	PGAP1	chr2	-18.2033	1.95236	4.2e-10	1.21e-09	667050	Negative	protein_coding
ENSG00000273305	cg23970798	RP11-440D17.4	chr2	0.260882	0.0307641	4.23e-10	1.22e-09	372294	Positive	lincRNA
ENSG00000270820	cg04758010	RP11-355B11.2	chr2	0.710673	0.0843237	4.44e-10	1.28e-09	-940990	Negative	antisense
ENSG00000136709	cg10180764	WDR33	chr2	16.7761	1.88714	4.45e-10	1.28e-09	-174138	Negative	protein_coding
ENSG00000138018	cg17509807	EPT1	chr2	37.0859	4.08325	4.45e-10	1.28e-09	-1048091	Negative	protein_coding
ENSG00000114933	cg24744501	INO80D	chr2	-9.3714	1.14158	5.14e-10	1.47e-09	165730	Negative	protein_coding
ENSG00000068724	cg21405109	TTC7A	chr2	-10.6022	1.19836	5.15e-10	1.47e-09	-866809	Negative	protein_coding
ENSG00000144583	cg09162385	MARCHF4	chr2	1.63068	0.191768	7.15e-10	2.02e-09	349513	Positive	protein_coding
ENSG00000018510	cg14807549	AGPS	chr2	5.32457	0.620456	7.2e-10	2.04e-09	-1058453	Positive	protein_coding
ENSG00000118965	cg09853866	WDR35	chr2	16.1077	1.90012	7.34e-10	2.07e-09	440639	Positive	protein_coding
ENSG00000163166	cg12632573	IWS1	chr2	8.11286	0.955176	7.66e-10	2.16e-09	-410540	Positive	protein_coding
ENSG00000261096	cg15527197	RP11-690I21.2	chr2	-0.498804	0.0596248	7.88e-10	2.22e-09	753139	Negative	sense_overlapping
ENSG00000233870	cg24265195	AC007881.4	chr2	0.303874	0.0307224	8.15e-10	2.3e-09	-370201	Positive	unprocessed_pseudogene
ENSG00000115816	cg18163683	CEBPZ	chr2	-14.7476	1.6696	9.07e-10	2.55e-09	896230	Negative	protein_coding
ENSG00000225439	cg20090558	BOLA3-AS1	chr2	2.08552	0.238776	1.06e-09	2.96e-09	971962	Positive	antisense
ENSG00000178623	cg25284798	GPR35	chr2	-1.89475	0.210224	1.12e-09	3.12e-09	222623	Negative	protein_coding
ENSG00000211460	cg13208492	TSN	chr2	16.5062	1.77913	1.17e-09	3.25e-09	-18697	Negative	protein_coding
ENSG00000162997	cg18257814	PRORSD1P	chr2	-1.08413	0.132642	1.26e-09	3.49e-09	-136975	Negative	transcribed_unitary_pseudogene
ENSG00000115641	cg08926965	FHL2	chr2	-1.77212	0.212954	1.29e-09	3.57e-09	-485065	Negative	protein_coding
ENSG00000256671	cg10869830	LIMS4	chr2	-0.221844	0.0266666	1.33e-09	3.68e-09	-900364	Positive	protein_coding
ENSG00000153201	cg21184585	RANBP2	chr2	56.3656	6.72252	1.37e-09	3.79e-09	-894836	Positive	protein_coding
ENSG00000176720	cg08584184	BOK	chr2	9.26308	0.852762	1.43e-09	3.95e-09	236074	Positive	protein_coding
ENSG00000189362	cg04955406	NEMP2	chr2	0.622503	0.0737787	1.48e-09	4.08e-09	-720106	Positive	protein_coding
ENSG00000135622	cg00893834	SEMA4F	chr2	-5.8972	0.704002	1.55e-09	4.27e-09	916793	Negative	protein_coding
ENSG00000144040	cg01833212	SFXN5	chr2	16.2567	1.72884	1.59e-09	4.37e-09	-22818	Positive	protein_coding
ENSG00000233716	cg12904795	AC074367.1	chr2	0.298166	0.0362459	1.73e-09	4.74e-09	786225	Positive	processed_pseudogene
ENSG00000177519	cg10316514	RPRM	chr2	0.518951	0.0636229	1.97e-09	5.37e-09	-990623	Positive	protein_coding
ENSG00000144115	cg26963093	THNSL2	chr2	-6.11951	0.792344	2.06e-09	5.6e-09	84	Negative	protein_coding
ENSG00000068912	cg15418474	ERLEC1	chr2	19.2935	2.35739	2.12e-09	5.75e-09	-77	Negative	protein_coding
ENSG00000163806	cg03275949	SPDYA	chr2	0.672487	0.0751625	2.36e-09	6.39e-09	891779	Positive	protein_coding
ENSG00000095002	cg21405109	MSH2	chr2	14.4288	1.77396	2.6e-09	7e-09	-379997	Negative	protein_coding
ENSG00000144191	cg14211415	CNGA3	chr2	9.54175	1.20516	2.64e-09	7.11e-09	350248	Positive	protein_coding
ENSG00000143942	cg01135477	CHAC2	chr2	1.13747	0.138116	2.96e-09	7.94e-09	-19076	Positive	protein_coding
ENSG00000236790	cg23004591	LINC00299	chr2	-1.27745	0.143292	3.4e-09	9.07e-09	1434037	Negative	lincRNA
ENSG00000229127	cg11421132	AC007038.7	chr2	-0.578456	0.0725607	3.45e-09	9.2e-09	451317	Negative	antisense
ENSG00000115875	cg09635984	SRSF7	chr2	-29.2549	3.57774	3.54e-09	9.43e-09	973594	Negative	protein_coding
ENSG00000144026	cg17995403	ZNF514	chr2	-53.0342	6.6112	3.66e-09	9.73e-09	20551	Negative	protein_coding
ENSG00000237753	cg08231831	AC079922.3	chr2	-0.564203	0.0718641	3.76e-09	9.99e-09	-14362	Negative	lincRNA
ENSG00000084764	cg01740367	MAPRE3	chr2	-22.1254	2.67342	4.18e-09	1.11e-08	-100784	Negative	protein_coding
ENSG00000068024	cg24831107	HDAC4	chr2	4.78527	0.570212	4.55e-09	1.2e-08	-759670	Positive	protein_coding
ENSG00000163075	cg10340658	CFAP221	chr2	-4.03065	0.517969	5.37e-09	1.4e-08	439984	Negative	protein_coding
ENSG00000169599	cg08194677	NFU1	chr2	-4.93346	0.596543	5.38e-09	1.41e-08	-382768	Negative	protein_coding
ENSG00000138078	cg09615101	PREPL	chr2	-85.4196	10.4508	5.52e-09	1.44e-08	625087	Negative	protein_coding
ENSG00000115216	cg25223497	NRBP1	chr2	-10.5343	1.28273	5.58e-09	1.46e-08	71881	Negative	protein_coding
ENSG00000132305	cg06415678	IMMT	chr2	11.4249	1.47933	5.85e-09	1.52e-08	419565	Positive	protein_coding
ENSG00000136720	cg19925427	HS6ST1	chr2	-48.9859	5.74572	5.93e-09	1.54e-08	-3244	Positive	protein_coding
ENSG00000237772	cg21620608	AC092620.3	chr2	4.88633	0.536734	6.07e-09	1.58e-08	99703	Positive	lincRNA
ENSG00000077232	cg11166746	DNAJC10	chr2	-15.3748	1.93238	6.19e-09	1.61e-08	-407937	Negative	protein_coding
ENSG00000085760	cg14821713	MTIF2	chr2	-2.5131	0.31394	6.25e-09	1.62e-08	-226738	Negative	protein_coding
ENSG00000114956	cg03230456	DGUOK	chr2	3.26431	0.392776	6.99e-09	1.81e-08	-785315	Positive	protein_coding
ENSG00000115827	cg04530992	DCAF17	chr2	11.8123	1.40272	7.36e-09	1.9e-08	-460054	Positive	protein_coding
ENSG00000187944	cg20913732	C2orf66	chr2	0.614112	0.0771542	8.72e-09	2.24e-08	121693	Positive	protein_coding
ENSG00000188687	cg09916336	SLC4A5	chr2	21.8066	2.75102	9.25e-09	2.37e-08	438763	Positive	protein_coding
ENSG00000172845	cg17160437	SP3	chr2	-7.83387	0.994736	9.26e-09	2.37e-08	460497	Negative	protein_coding
ENSG00000172428	cg08748373	COPS9	chr2	2.37451	0.274149	9.55e-09	2.44e-08	309402	Positive	protein_coding
ENSG00000213225	cg24284522	NOC2LP1	chr2	2.42411	0.296726	9.65e-09	2.46e-08	-782149	Positive	transcribed_processed_pseudogene
ENSG00000188177	cg04746199	ZC3H6	chr2	-15.9142	2.04835	9.73e-09	2.48e-08	-1001360	Negative	protein_coding
ENSG00000119844	cg00626599	AFTPH	chr2	22.4519	2.86367	1.01e-08	2.57e-08	682534	Positive	protein_coding
ENSG00000144231	cg21339084	POLR2D	chr2	-3.94011	0.511689	1.03e-08	2.62e-08	-178694	Negative	protein_coding
ENSG00000144395	cg18949409	CCDC150	chr2	-0.425547	0.0533156	1.1e-08	2.79e-08	467776	Negative	protein_coding
ENSG00000132326	cg02933624	PER2	chr2	8.19333	1.01207	1.19e-08	3.01e-08	-913690	Positive	protein_coding
ENSG00000138448	cg26839791	ITGAV	chr2	-152.311	19.826	1.3e-08	3.28e-08	-103729	Negative	protein_coding
ENSG00000272851	cg16881408	RP11-801F7.1	chr2	1.03566	0.118422	1.36e-08	3.42e-08	-528393	Positive	antisense
ENSG00000135931	cg16819369	ARMC9	chr2	-44.3281	5.42558	1.37e-08	3.45e-08	333527	Negative	protein_coding
ENSG00000213160	cg04949346	KLHL23	chr2	-7.74756	1.0111	1.38e-08	3.47e-08	804000	Negative	protein_coding
ENSG00000132313	cg08229694	MRPL35	chr2	11.7838	1.46501	1.43e-08	3.59e-08	4281	Positive	protein_coding
ENSG00000261338	cg04184094	RP11-378A13.1	chr2	-0.811283	0.104007	1.61e-08	4.03e-08	-67257	Negative	sense_overlapping
ENSG00000081479	cg04922656	LRP2	chr2	-80.787	10.0988	1.62e-08	4.05e-08	567086	Negative	protein_coding
ENSG00000084090	cg07224438	STARD7	chr2	25.8925	3.38193	1.62e-08	4.05e-08	575889	Negative	protein_coding
ENSG00000197557	cg13332925	TTC30A	chr2	10.2094	1.2898	1.62e-08	4.05e-08	-220168	Negative	protein_coding
ENSG00000115970	cg15131722	THADA	chr2	5.66552	0.750259	1.85e-08	4.6e-08	1131192	Positive	protein_coding
ENSG00000213963	cg00789792	AC074286.1	chr2	1.18269	0.158172	1.86e-08	4.63e-08	1097469	Positive	sense_overlapping
ENSG00000116095	cg00534253	PLEKHA3	chr2	7.05453	0.80207	1.87e-08	4.65e-08	29561	Negative	protein_coding
ENSG00000138411	cg18527435	HECW2	chr2	-12.8632	1.65293	1.94e-08	4.82e-08	-120167	Negative	protein_coding
ENSG00000196862	cg20520273	RGPD4	chr2	1.14596	0.150467	1.94e-08	4.82e-08	-959746	Positive	protein_coding
ENSG00000168890	cg08229694	TMEM150A	chr2	-1.49011	0.19539	1.97e-08	4.89e-08	596527	Negative	protein_coding
ENSG00000234028	cg13876776	AC062029.1	chr2	-4.78768	0.628961	2.07e-08	5.12e-08	571657	Negative	antisense
ENSG00000114988	cg26912078	LMAN2L	chr2	1.7201	0.223883	2.19e-08	5.41e-08	151642	Positive	protein_coding
ENSG00000125629	cg05036212	INSIG2	chr2	-10.6335	1.39554	2.19e-08	5.41e-08	-763663	Negative	protein_coding
ENSG00000196912	cg21258705	ANKRD36B	chr2	8.76627	1.11443	2.23e-08	5.5e-08	-529971	Positive	protein_coding
ENSG00000198522	cg01740367	GPN1	chr2	4.80272	0.627457	2.45e-08	6.02e-08	556851	Positive	protein_coding
ENSG00000240356	cg27665312	RPL23AP7	chr2	2.87327	0.367862	2.74e-08	6.71e-08	146328	Positive	transcribed_processed_pseudogene
ENSG00000222000	cg14628889	AC092675.3	chr2	-0.240744	0.0313138	2.77e-08	6.77e-08	810429	Negative	antisense
ENSG00000084774	cg04151012	CAD	chr2	4.62424	0.593513	2.85e-08	6.97e-08	-366293	Negative	protein_coding
ENSG00000135999	cg21579828	EPC2	chr2	-5.59377	0.724879	2.96e-08	7.22e-08	800271	Negative	protein_coding
ENSG00000171055	cg04525212	FEZ2	chr2	-6.82005	0.862236	3.02e-08	7.37e-08	-176017	Negative	protein_coding
ENSG00000135631	cg11251086	RAB11FIP5	chr2	-30.962	3.9753	3.13e-08	7.62e-08	706638	Negative	protein_coding
ENSG00000138385	cg14352442	SSB	chr2	8.92014	1.15528	3.15e-08	7.67e-08	-35754	Negative	protein_coding
ENSG00000163162	cg05861971	RNF149	chr2	-2.59288	0.343231	3.26e-08	7.93e-08	-451202	Negative	protein_coding
ENSG00000055332	cg07589149	EIF2AK2	chr2	-7.82318	0.995193	3.32e-08	8.07e-08	836187	Negative	protein_coding
ENSG00000184182	cg17056000	UBE2F	chr2	3.5079	0.455259	3.42e-08	8.3e-08	-99648	Positive	protein_coding
ENSG00000084731	cg16498920	KIF3C	chr2	26.6128	3.1993	3.51e-08	8.51e-08	-674176	Positive	protein_coding
ENSG00000196504	cg04117832	PRPF40A	chr2	-9.15557	1.22935	3.58e-08	8.67e-08	-822877	Negative	protein_coding
ENSG00000186522	cg15605888	SEPTIN10	chr2	8.62881	1.11844	3.89e-08	9.4e-08	-755962	Positive	protein_coding
ENSG00000234231	cg02988254	AC093616.4	chr2	-0.615936	0.0759782	3.98e-08	9.61e-08	-990703	Negative	unprocessed_pseudogene
ENSG00000015568	cg24154631	RGPD5	chr2	35.314	4.58627	4.07e-08	9.82e-08	-902210	Positive	protein_coding
ENSG00000115295	cg06591652	CLIP4	chr2	-34.1196	4.52508	4.49e-08	1.08e-07	704943	Positive	protein_coding
ENSG00000136717	cg15634735	BIN1	chr2	-102.282	13.4157	4.67e-08	1.12e-07	979021	Positive	protein_coding
ENSG00000162971	cg05142833	TYW5	chr2	-10.3269	1.27467	4.83e-08	1.16e-07	-189118	Negative	protein_coding
ENSG00000159399	cg19234858	HK2	chr2	914.185	116.308	4.91e-08	1.18e-07	304736	Negative	protein_coding
ENSG00000055813	cg02271827	CCDC85A	chr2	-3.57127	0.421643	4.93e-08	1.18e-07	412524	Negative	protein_coding
ENSG00000125637	cg04746199	PSD4	chr2	4.61936	0.474624	4.99e-08	1.19e-07	-119632	Positive	protein_coding
ENSG00000079785	cg01312393	DDX1	chr2	-24.3929	3.30961	5.23e-08	1.25e-07	-350178	Positive	protein_coding
ENSG00000135924	cg02322376	DNAJB2	chr2	-42.9856	5.68257	5.42e-08	1.29e-07	72621	Positive	protein_coding
ENSG00000224928	cg25859012	KRT8P30	chr2	-0.339059	0.0445171	5.65e-08	1.34e-07	-293846	Positive	processed_pseudogene
ENSG00000229692	cg09181878	SOS1-IT1	chr2	0.626954	0.0836907	5.66e-08	1.35e-07	-240743	Positive	sense_intronic
ENSG00000125551	cg03085106	PLGLB2	chr2	-2.0889	0.29322	6e-08	1.42e-07	-533271	Negative	protein_coding
ENSG00000116030	cg20732105	SUMO1	chr2	-17.3833	2.35036	6.4e-08	1.51e-07	-171998	Negative	protein_coding
ENSG00000144290	cg13327466	SLC4A10	chr2	-31.8893	4.35679	6.57e-08	1.55e-07	-200025	Negative	protein_coding
ENSG00000078018	cg04507925	MAP2	chr2	-169.301	23.7447	7.5e-08	1.76e-07	-535988	Negative	protein_coding
ENSG00000115541	cg24512321	HSPE1	chr2	-4.40849	0.569384	8.07e-08	1.89e-07	-814684	Negative	protein_coding
ENSG00000168395	cg14933899	ING5	chr2	-7.59473	1.01261	8.44e-08	1.97e-07	584665	Negative	protein_coding
ENSG00000115207	cg24855396	GTF3C2	chr2	8.75522	1.17687	9.08e-08	2.12e-07	-848661	Positive	protein_coding
ENSG00000138079	cg04881214	SLC3A1	chr2	-0.786029	0.0996275	9.25e-08	2.16e-07	106733	Positive	protein_coding
ENSG00000171132	cg15554875	PRKCE	chr2	21.54	2.77799	9.3e-08	2.17e-07	641798	Positive	protein_coding
ENSG00000230606	cg26912078	AC159540.1	chr2	8.72019	1.13084	9.62e-08	2.24e-07	-558594	Negative	lincRNA
ENSG00000018699	cg02727605	TTC27	chr2	3.58882	0.495602	9.8e-08	2.28e-07	617101	Positive	protein_coding
ENSG00000157827	cg13570853	FMNL2	chr2	12.8395	1.64782	1e-07	2.32e-07	925108	Negative	protein_coding
ENSG00000135972	cg08891558	MRPS9	chr2	-4.16993	0.560308	1.05e-07	2.43e-07	-87624	Negative	protein_coding
ENSG00000151779	cg17722263	NBAS	chr2	-7.53445	1.03233	1.05e-07	2.43e-07	753359	Positive	protein_coding
ENSG00000177917	cg10911952	ARL6IP6	chr2	10.2463	1.35672	1.18e-07	2.72e-07	618638	Positive	protein_coding
ENSG00000115966	cg07566169	ATF2	chr2	-19.2242	2.70349	1.2e-07	2.76e-07	1036712	Negative	protein_coding
ENSG00000221823	cg01275515	PPP3R1	chr2	255.745	35.1736	1.22e-07	2.81e-07	-20958	Positive	protein_coding
ENSG00000270574	cg25844977	RP11-171I2.2	chr2	-0.22505	0.0322397	1.23e-07	2.83e-07	853936	Negative	antisense
ENSG00000169554	cg23310540	ZEB2	chr2	17.9395	2.4656	1.26e-07	2.9e-07	-882656	Positive	protein_coding
ENSG00000175701	cg26001287	LINC00116	chr2	1.48923	0.202597	1.36e-07	3.12e-07	908647	Positive	protein_coding
ENSG00000143970	cg02313965	ASXL2	chr2	24.0815	3.21557	1.54e-07	3.52e-07	-940040	Positive	protein_coding
ENSG00000144445	cg07239116	KANSL1L	chr2	-3.16038	0.428078	1.54e-07	3.52e-07	150105	Positive	protein_coding
ENSG00000134323	cg07251280	MYCN	chr2	1.34875	0.166948	1.76e-07	4e-07	207975	Positive	protein_coding
ENSG00000185404	cg14473050	SP140L	chr2	-0.686367	0.0945855	1.84e-07	4.17e-07	-537819	Negative	protein_coding
ENSG00000172878	cg08856772	METAP1D	chr2	4.55293	0.638236	1.94e-07	4.39e-07	105437	Positive	protein_coding
ENSG00000144182	cg15496985	LIPT1	chr2	2.73642	0.319801	2.04e-07	4.6e-07	187	Positive	protein_coding
ENSG00000079246	cg03222971	XRCC5	chr2	-60.1959	8.05831	2.4e-07	5.37e-07	-586833	Positive	protein_coding
ENSG00000138443	cg00035812	ABI2	chr2	63.159	9.13999	2.41e-07	5.4e-07	-416	Positive	protein_coding
ENSG00000136715	cg08385249	SAP130	chr2	3.20067	0.437339	2.43e-07	5.44e-07	-265418	Positive	protein_coding
ENSG00000144504	cg14933899	ANKMY1	chr2	-2.76626	0.356477	2.45e-07	5.48e-07	622998	Negative	protein_coding
ENSG00000242735	cg18110965	RPSAP26	chr2	-0.33857	0.0479212	2.49e-07	5.56e-07	-49535	Negative	processed_pseudogene
ENSG00000118242	cg10820936	MREG	chr2	-9.67674	1.3451	2.94e-07	6.53e-07	63927	Negative	protein_coding
ENSG00000267520	cg22197434	RP11-373L24.1	chr2	-4.01518	0.5718	3.01e-07	6.68e-07	371827	Negative	3prime_overlapping_ncRNA
ENSG00000239305	cg12737876	RNF103	chr2	6.50115	0.889898	3.02e-07	6.7e-07	-987289	Negative	protein_coding
ENSG00000172318	cg23819100	B3GALT1	chr2	2.01769	0.288837	3.5e-07	7.72e-07	-476862	Positive	protein_coding
ENSG00000172974	cg02205099	AC007318.5	chr2	0.251814	0.0355326	3.59e-07	7.9e-07	17693	Positive	processed_pseudogene
ENSG00000163798	cg04617441	SLC4A1AP	chr2	4.62714	0.643103	3.62e-07	7.97e-07	253743	Positive	protein_coding
ENSG00000055044	cg21014120	NOP58	chr2	11.2647	1.51426	3.95e-07	8.67e-07	-606064	Negative	protein_coding
ENSG00000162951	cg13229579	LRRTM1	chr2	-0.508968	0.073875	3.99e-07	8.75e-07	-650594	Negative	protein_coding
ENSG00000114948	cg16353127	ADAM23	chr2	-7.44735	1.05888	4.29e-07	9.39e-07	182988	Negative	protein_coding
ENSG00000157985	cg15872575	AGAP1	chr2	83.6332	11.3764	4.7e-07	1.02e-06	-770351	Positive	protein_coding
ENSG00000275052	cg20338300	PPP4R3B	chr2	-28.5578	4.11874	5.3e-07	1.15e-06	637107	Negative	protein_coding
ENSG00000272913	cg21385616	RP11-440D17.3	chr2	2.32769	0.334333	5.64e-07	1.22e-06	591247	Negative	lincRNA
ENSG00000143870	cg11774850	PDIA6	chr2	17.9141	2.34781	5.81e-07	1.25e-06	957821	Positive	protein_coding
ENSG00000163482	cg21295476	STK36	chr2	-24.104	2.66462	5.92e-07	1.28e-06	-308105	Negative	protein_coding
ENSG00000143919	cg08319079	CAMKMT	chr2	-1.52435	0.203666	5.98e-07	1.29e-06	-571138	Negative	protein_coding
ENSG00000272807	cg04100532	RP11-260M2.1	chr2	-0.372856	0.0544131	6.18e-07	1.33e-06	256581	Negative	antisense
ENSG00000279267	cg27665312	RP11-395L14.18	chr2	2.69407	0.390746	6.7e-07	1.44e-06	150963	Positive	TEC
ENSG00000135932	cg17661357	CAB39	chr2	33.2941	4.45147	6.76e-07	1.45e-06	-1073390	Positive	protein_coding
ENSG00000138413	cg20873420	IDH1	chr2	-14.8353	1.96696	6.96e-07	1.49e-06	-466034	Negative	protein_coding
ENSG00000171150	cg23104428	SOCS5	chr2	18.2184	2.55585	6.97e-07	1.49e-06	-373540	Positive	protein_coding
ENSG00000226853	cg19979107	AC010894.3	chr2	-0.252437	0.0360796	7.21e-07	1.54e-06	152	Negative	lincRNA
ENSG00000144407	cg18755114	PTH2R	chr2	7.23646	1.07521	7.5e-07	1.6e-06	105408	Positive	protein_coding
ENSG00000079308	cg27288971	TNS1	chr2	46.0957	6.31652	7.58e-07	1.62e-06	417629	Positive	protein_coding
ENSG00000118260	cg08953113	CREB1	chr2	12.1476	1.73108	8.53e-07	1.81e-06	-181884	Positive	protein_coding
ENSG00000273064	cg08562592	RP11-474G23.3	chr2	-0.177286	0.0262039	9.23e-07	1.95e-06	19738	Negative	antisense
ENSG00000170802	cg05977259	FOXN2	chr2	-1.72956	0.25067	9.77e-07	2.06e-06	408723	Negative	protein_coding
ENSG00000243819	cg13734707	RN7SL832P	chr2	0.505026	0.071433	1.04e-06	2.19e-06	290166	Positive	lincRNA
ENSG00000013016	cg15062189	EHD3	chr2	-11.4063	1.70898	1.11e-06	2.33e-06	-805597	Positive	protein_coding
ENSG00000153208	cg08740967	MERTK	chr2	-9.26607	1.26554	1.18e-06	2.47e-06	-725999	Negative	protein_coding
ENSG00000143891	cg03247208	GALM	chr2	3.19003	0.441922	1.22e-06	2.55e-06	-112425	Positive	protein_coding
ENSG00000152683	cg02727605	SLC30A6	chr2	5.22478	0.768533	1.28e-06	2.67e-06	154910	Positive	protein_coding
ENSG00000272769	cg17321385	RP11-725P16.2	chr2	-0.203494	0.0311509	1.31e-06	2.73e-06	-673396	Positive	lincRNA
ENSG00000119862	cg27159677	LGALSL	chr2	-35.9352	5.38195	1.34e-06	2.79e-06	-978256	Positive	protein_coding
ENSG00000153832	cg05658730	FBXO36	chr2	-1.69348	0.247602	1.35e-06	2.81e-06	-792540	Negative	protein_coding
ENSG00000075340	cg20663997	ADD2	chr2	51.1095	7.13201	1.48e-06	3.07e-06	-962779	Negative	protein_coding
ENSG00000135900	cg13529898	MRPL44	chr2	2.00027	0.311565	1.62e-06	3.35e-06	-839216	Positive	protein_coding
ENSG00000155755	cg18429434	TMEM237	chr2	136.799	20.8462	1.63e-06	3.37e-06	1014824	Positive	protein_coding
ENSG00000158435	cg05861971	CNOT11	chr2	-2.46876	0.359773	1.74e-06	3.59e-06	432869	Positive	protein_coding
ENSG00000173744	cg19382545	AGFG1	chr2	-25.2739	3.79487	1.75e-06	3.6e-06	673199	Negative	protein_coding
ENSG00000115073	cg00179844	ACTR1B	chr2	-6.41373	0.94975	1.77e-06	3.64e-06	257859	Negative	protein_coding
ENSG00000115468	cg11043438	EFHD1	chr2	-8.87357	1.11823	1.79e-06	3.68e-06	17267	Positive	protein_coding
ENSG00000163214	cg18915467	DHX57	chr2	-3.29083	0.500206	1.86e-06	3.82e-06	-920030	Negative	protein_coding
ENSG00000123977	cg10156861	DAW1	chr2	-0.274138	0.0407845	1.87e-06	3.84e-06	545973	Negative	protein_coding
ENSG00000068654	cg00670742	POLR1A	chr2	10.0373	1.50214	1.93e-06	3.96e-06	787492	Positive	protein_coding
ENSG00000068781	cg00493304	STON1-GTF2A1L	chr2	2.97857	0.429957	2.02e-06	4.13e-06	-87844	Positive	protein_coding
ENSG00000072135	cg17578196	PTPN18	chr2	7.153	1.06973	2.21e-06	4.5e-06	432932	Positive	protein_coding
ENSG00000204104	cg05486647	TRAF3IP1	chr2	4.57533	0.635842	2.31e-06	4.7e-06	42490	Positive	protein_coding
ENSG00000035141	cg23081331	FAM136A	chr2	5.51775	0.822785	2.37e-06	4.82e-06	-47109	Positive	protein_coding
ENSG00000197329	cg11050609	PELI1	chr2	7.44508	1.1145	2.42e-06	4.92e-06	1037819	Positive	protein_coding
ENSG00000213553	cg04395688	RPLP0P6	chr2	1.06088	0.158099	2.54e-06	5.15e-06	-955755	Positive	processed_pseudogene
ENSG00000280119	cg16599744	AC093642.1	chr2	-0.723816	0.107135	2.6e-06	5.26e-06	115051	Negative	TEC
ENSG00000270571	cg20340806	RP11-355F16.1	chr2	0.643075	0.0962467	2.71e-06	5.48e-06	975547	Positive	antisense
ENSG00000204406	cg06394585	MBD5	chr2	-4.52172	0.720817	2.86e-06	5.76e-06	665	Positive	protein_coding
ENSG00000121988	cg23566794	ZRANB3	chr2	2.23201	0.348494	2.93e-06	5.9e-06	-409374	Positive	protein_coding
ENSG00000115866	cg16549637	DARS	chr2	-20.8619	3.11262	3.12e-06	6.26e-06	187779	Negative	protein_coding
ENSG00000226833	cg18743140	AC097724.3	chr2	-0.801553	0.114229	3.18e-06	6.38e-06	-250361	Negative	antisense
ENSG00000214336	cg03085106	FOXI3	chr2	1.60671	0.240417	3.43e-06	6.86e-06	-165429	Negative	protein_coding
ENSG00000172086	cg19910382	KRCC1	chr2	-9.12359	1.39267	3.51e-06	7.01e-06	100837	Negative	protein_coding
ENSG00000283228	cg17873910	CTD-2021K4.1	chr2	2.05904	0.311246	3.53e-06	7.04e-06	532657	Positive	protein_coding
ENSG00000138430	cg15482976	OLA1	chr2	-16.9294	2.46456	3.74e-06	7.45e-06	-108202	Negative	protein_coding
ENSG00000136699	cg17578196	SMPD4	chr2	11.101	1.75047	3.92e-06	7.79e-06	-228279	Negative	protein_coding
ENSG00000135925	cg05546878	WNT10A	chr2	-2.32608	0.327388	4.45e-06	8.81e-06	48880	Negative	protein_coding
ENSG00000138376	cg17400031	BARD1	chr2	4.76958	0.722336	4.49e-06	8.88e-06	585887	Positive	protein_coding
ENSG00000226266	cg22512663	AC009961.3	chr2	0.321994	0.050168	4.49e-06	8.88e-06	595204	Positive	lincRNA
ENSG00000261829	cg25971292	RP11-223I10.1	chr2	-0.670796	0.0903247	4.57e-06	9.03e-06	-641733	Negative	sense_overlapping
ENSG00000168702	cg22830273	LRP1B	chr2	-6.06577	0.979941	4.62e-06	9.12e-06	1900291	Negative	protein_coding
ENSG00000218739	cg07049977	CEBPZOS	chr2	3.90462	0.56866	5.05e-06	9.94e-06	-34905	Positive	protein_coding
ENSG00000151694	cg07649498	ADAM17	chr2	12.9323	1.70955	5.09e-06	1e-05	-65329	Positive	protein_coding
ENSG00000152256	cg27055476	PDK1	chr2	-46.1417	6.97428	5.28e-06	1.04e-05	-717762	Negative	protein_coding
ENSG00000248672	cg10279072	LY75-CD302	chr2	-0.571788	0.0840384	5.42e-06	1.06e-05	-653010	Negative	protein_coding
ENSG00000242282	cg05121660	AC108488.4	chr2	0.461807	0.0700035	5.75e-06	1.13e-05	-49332	Negative	lincRNA
ENSG00000136546	cg20489467	SCN7A	chr2	-21.4691	3.36548	6.05e-06	1.18e-05	-449633	Negative	protein_coding
ENSG00000158050	cg13112407	DUSP2	chr2	-1.30602	0.150105	6.07e-06	1.19e-05	396025	Negative	protein_coding
ENSG00000064012	cg23280754	CASP8	chr2	2.40891	0.359094	6.76e-06	1.32e-05	-123726	Positive	protein_coding
ENSG00000119865	cg01275515	CNRIP1	chr2	30.0692	4.74771	7.18e-06	1.4e-05	-126272	Positive	protein_coding
ENSG00000119777	cg14462928	TMEM214	chr2	-8.28179	1.22861	7.64e-06	1.48e-05	-17424	Negative	protein_coding
ENSG00000196208	cg14465207	GREB1	chr2	-2.08043	0.300865	7.69e-06	1.49e-05	671217	Positive	protein_coding
ENSG00000115306	cg15687447	SPTBN1	chr2	-199.354	30.45	8.2e-06	1.59e-05	-825900	Negative	protein_coding
ENSG00000204929	cg11433622	AC074391.1	chr2	0.172671	0.0265425	9.34e-06	1.8e-05	-1003706	Positive	processed_transcript
ENSG00000115290	cg16305248	GRB14	chr2	-1.10737	0.17689	9.6e-06	1.84e-05	252406	Negative	protein_coding
ENSG00000150938	cg09904111	CRIM1	chr2	41.1883	6.73394	1.02e-05	1.95e-05	-840893	Positive	protein_coding
ENSG00000182263	cg10394294	FIGN	chr2	-1.71697	0.292827	1.02e-05	1.95e-05	124373	Negative	protein_coding
ENSG00000152133	cg19911844	GPATCH11	chr2	16.0328	2.5678	1.08e-05	2.06e-05	-240297	Positive	protein_coding
ENSG00000186235	cg14359659	AC016757.3	chr2	-1.24351	0.175424	1.1e-05	2.1e-05	-61150	Negative	processed_transcript
ENSG00000278962	cg19149114	RP11-399B17.1	chr2	0.511485	0.0828218	1.14e-05	2.17e-05	534740	Positive	TEC
ENSG00000115474	cg12908797	KCNJ13	chr2	6.191	0.902777	1.17e-05	2.23e-05	565486	Positive	protein_coding
ENSG00000240344	cg09731141	PPIL3	chr2	-2.94817	0.467546	1.25e-05	2.37e-05	771732	Negative	protein_coding
ENSG00000276517	cg23829772	AL133243.2	chr2	-0.399446	0.0640591	1.25e-05	2.37e-05	-54509	Negative	sense_intronic
ENSG00000168894	cg04738827	RNF181	chr2	2.5738	0.402024	1.31e-05	2.48e-05	-16802	Positive	protein_coding
ENSG00000123983	cg14449571	ACSL3	chr2	36.2775	6.02066	1.33e-05	2.52e-05	204800	Positive	protein_coding
ENSG00000233251	cg23515644	AC007743.1	chr2	-0.428483	0.0665837	1.33e-05	2.52e-05	-720354	Negative	antisense
ENSG00000198586	cg04863950	TLK1	chr2	34.5581	5.04943	1.38e-05	2.61e-05	532376	Positive	protein_coding
ENSG00000144488	cg21657788	ESPNL	chr2	1.42009	0.190367	1.39e-05	2.63e-05	842138	Positive	protein_coding
ENSG00000116039	cg11660398	ATP6V1B1	chr2	-1.04289	0.159516	1.42e-05	2.68e-05	28840	Negative	protein_coding
ENSG00000178074	cg21136715	C2orf69	chr2	-8.08689	1.32882	1.44e-05	2.72e-05	453764	Negative	protein_coding
ENSG00000138449	cg11692477	SLC40A1	chr2	29.8797	4.9625	1.45e-05	2.73e-05	20172	Positive	protein_coding
ENSG00000204311	cg13667965	DFNB59	chr2	-0.5678	0.0897604	1.45e-05	2.73e-05	32005	Positive	protein_coding
ENSG00000136710	cg04173252	CCDC115	chr2	-2.01541	0.338217	1.46e-05	2.75e-05	4981	Negative	protein_coding
ENSG00000227252	cg18757710	AC105760.2	chr2	-0.418518	0.0669142	1.63e-05	3.06e-05	-948532	Negative	antisense
ENSG00000163510	cg17152205	CWC22	chr2	-5.43492	0.880644	1.84e-05	3.43e-05	181044	Negative	protein_coding
ENSG00000144331	cg26619478	ZNF385B	chr2	22.8553	3.77669	1.85e-05	3.45e-05	-177082	Negative	protein_coding
ENSG00000138073	cg01704636	PREB	chr2	-6.79178	1.08724	1.99e-05	3.7e-05	-402271	Negative	protein_coding
ENSG00000119004	cg08366885	CYP20A1	chr2	1.34415	0.225598	2e-05	3.71e-05	-295708	Positive	protein_coding
ENSG00000198885	cg22589722	ITPRIPL1	chr2	0.929194	0.14808	2.04e-05	3.78e-05	-608891	Positive	protein_coding
ENSG00000152518	cg18542495	ZFP36L2	chr2	21.1991	3.26183	2.06e-05	3.82e-05	46000	Positive	protein_coding
ENSG00000138081	cg21405109	FBXO11	chr2	14.7327	2.09339	2.2e-05	4.07e-05	-6350	Positive	protein_coding
ENSG00000251485	cg18867375	AC068134.10	chr2	-1.13718	0.1805	2.32e-05	4.28e-05	-207142	Negative	processed_pseudogene
ENSG00000281195	cg13019856	ZNF638-IT1	chr2	0.430928	0.0697545	2.63e-05	4.83e-05	655778	Positive	processed_transcript
ENSG00000276334	cg17678946	AL133243.1	chr2	-0.852548	0.145138	2.67e-05	4.9e-05	511071	Negative	sense_intronic
ENSG00000115145	cg13570853	STAM2	chr2	12.5807	2.01098	2.68e-05	4.92e-05	-706735	Positive	protein_coding
ENSG00000144036	cg23851476	EXOC6B	chr2	-9.10716	1.50046	2.81e-05	5.15e-05	740564	Negative	protein_coding
ENSG00000121989	cg06394585	ACVR2A	chr2	-3.4352	0.600405	2.84e-05	5.2e-05	-175829	Positive	protein_coding
ENSG00000118246	cg17764507	FASTKD2	chr2	-9.44976	1.58709	2.86e-05	5.23e-05	491015	Negative	protein_coding
[truncated: 11,748 more rows]
